# Supplementary material
Source: PubMed Central journal article supplement (PMC3873777)
Supplement: NIHMS490390-supplement-Supplement.pdf [file NIHMS490390-supplement-Supplement.pdf]

## Online Supplement

### Identification of Hypertension Susceptibility Loci on Rat Chromosome 12

Michael J. Flister<sup>1,2</sup>, Sasha Z. Prisco<sup>1,2</sup>, Allison B. Sarkis<sup>1,2</sup>, Caitlin C. O'Meara<sup>1,2</sup>, Matthew Hoffman<sup>1,2</sup>, Jaime Wendt-Andrae<sup>1</sup>, Carol Moreno<sup>1,2</sup>, Jozef Lazar<sup>1,3</sup>, Howard J. Jacob<sup>1,2,4</sup>

<sup>1</sup>Human and Molecular Genetics Center and Departments of <sup>2</sup>Physiology, <sup>3</sup>Dermatology, and <sup>4</sup>Pediatrics, Medical College of Wisconsin, Milwaukee, Wisconsin

## Expanded Materials and Methods

### Generation of SS-12<sup>BN</sup> Congenic Rats

All rats were provided food and water *ad libitum* and were housed at the Medical College of Wisconsin (MCW) Animal Resource Center. All procedures were approved by the MCW IACUC committee. The SS-12<sup>BN</sup>/Mcwi consomic was originally by selectively breeding the SS/JrHsd/Mcwi (SS) and BN/SsN/Mcwi (BN) strains as previously described.<sup>1</sup> Congenic strains were generated by crossing SS/JrHsd/Mcwi and SS-12<sup>BN</sup>/Mcwi, followed by intercrossing the F1 progeny and F2 generation to capture different regions of RNO12 by marker-assisted selection as described previously.<sup>1</sup> This approach resulted in three new congenic strains: line A [SS.BN-(D12Arb13-D12Mit2)/Mcwi; RGD ID 5683886], line B [SS.BN-(D12Hmgc3-D12Rat79)/Mcwi; RGD ID 5683888] and line C [SS.BN-(D12Hmgc3-D12Hmgc6)/Mcwi; RGD ID 5683890].

### Blood Pressure Measurement

At 9-10 weeks of age, telemetry transmitters (TA11PA-C40, Data Sciences, St. Paul, MN) were subcutaneously implanted with a catheter inserted into the abdominal aorta via the femoral artery. At post-surgical day 4, mean arterial pressure (MAP) was measured from 9AM to 1PM for three consecutive days on freely moving, conscious rats that were fed normal Purina chow (1% NaCl). Rats were then placed on high-salt diet (8% NaCl) for 7 days and MAP was measured again on day 7.

### Measurement of Protein and Albumin Excretion

On post-surgical day 3 (immediately prior to the first MAP recordings), rats were placed in metabolic cages and acclimated for 24 hours, followed by 24 hour urine collection. Total protein and albumin were measured as described previously.<sup>2,3</sup>

### Echocardiography

Echocardiographic assessments were performed on a GE Vivid 7 ultrasound machine (GE Healthcare, Waukesha, WI) equipped with a 10MHz transducer. Rats were anesthetized and echocardiographic images were recorded in the parasternal long axis (PLA) view. M-mode in PLA views was used to measure interventricular septum thickness during diastole.

### Histology

Kidneys and hearts were excised, fixed in 10% formalin, and paraffin-embedded. Tissues were sectioned at 3µm thickness and stained with Gomori's One-Step Trichrome. High-powered fields were acquired at 400X (kidney) and 200X (heart) magnification using a Nikon E-400 with a Spot Insight camera (Nikon Instruments, Melville, NY) and low-powered fields (heart) were acquired at 1X (4,000dpi) using a Nikon Coolscan VED (Nikon Instruments, Melville, NY). To assess renal damage, glomerular sclerosis was scored on a scale of 0 (~0% sclerosis) to 4 (~100% sclerosis) using images acquired at 400X magnification and presented as the mean score of 60 glomeruli per animal. Medullary protein casting was measured as described previously.<sup>4</sup> Percent medullary protein casting was calculated as [(protein cast area/total area)x100]. Cardiac fibrosis was measured from images acquired at 200X magnification (n=50 images per heart section). Fibrotic tissue was quantified as the percent of total left ventricle (LV) tissue using Metamorph software (Molecular Devices, Sunnyvale, CA).

## Genomic Sequencing and Analysis

Double stranded genomic DNA (gDNA) was isolated using a QIAamp DNA kit (Qiagen, Germantown, MD) from the liver of an 8 week old female SS/JrHsD/Mcwi rat from the colony maintained at the Medical College of Wisconsin. Isolated gDNA was quantified by PicoGreen assay (Invitrogen, Carlsbad, CA) and 3 µg of total gDNA was sheared to 300-400bp size using a Covaris E210 Acoustic Shearer. (Covaris, Wolburn, MA). Sheared gDNA was then prepped for sequencing using a SPRIworks Fragment Library System 1 kit (Beckman Coulter, Brea, CA). Adapted gDNA fragments were amplified by 6 rounds of PCR, followed by quality assessment of the gDNA library using the Agilent 2100 Bioanalyzer (Agilent Technology, Rockville, MD). Prior to sequencing, the gDNA library was quantified again via qPCR and clustered on the v3 flowcell using the cBot Cluster generation system (Illumina, San Diego, CA). Sequencing was performed on the HiSeq 2000 using TruSeq v3 chemistry and 2x100 paired end-reads. SS/JrHsD/Mcwi genomic sequence was aligned by Casava v1.8.1 to the BN/SsN/Mcwi reference genome generated by Gibbs et al<sup>5</sup> from gDNA isolated from one female BN/SsN/Mcwi rat. Casava v1.8.1 was set to default to include multi-seed alignment, gapped alignment (up to 10 bases), semi-repeat resolution, and orphan alignment. Variant detection used Casava v1.8.1 defaults and single nucleotide variants covered by two or more reads with a variant frequency of 30% or greater were included in annotation and downstream analysis. Compared with the BN/SsN/Mcwi reference genome, we detected a total of 3,424,433 variants across the SS/JrHsD/Mcwi genome.

## References

1. Cowley AW, Jr., Stoll M, Greene AS, Kaldunski ML, Roman RJ, Tonellato PJ, Schork NJ, Dumas P, Jacob HJ. Genetically defined risk of salt sensitivity in an intercross of brown norway and dahl s rats. *Physiol Genomics*. 2000;2:107-115
2. Mattson DL, Dwinell MR, Greene AS, Kwitek AE, Roman RJ, Jacob HJ, Cowley AW, Jr. Chromosome substitution reveals the genetic basis of dahl salt-sensitive hypertension and renal disease. *Am J Physiol Renal Physiol*. 2008;295:F837-842
3. Moreno C, Dumas P, Kaldunski ML, Tonellato PJ, Greene AS, Roman RJ, Cheng Q, Wang Z, Jacob HJ, Cowley AW, Jr. Genomic map of cardiovascular phenotypes of hypertension in female dahl s rats. *Physiol Genomics*. 2003;15:243-257
4. O'Meara CC, Lazar J, Hoffman M, Moreno C, Jacob HJ. Refined mapping of the renal failure rf-3 quantitative trait locus. *J Am Soc Nephrol*. 2011;22:518-525
5. Gibbs RA, Weinstock GM, Metzker ML, Muzny DM, Sodergren EJ, Scherer S, Scott G, Steffen D, Worley KC, Burch PE, Okwuonu G, Hines S, Lewis L, DeRamo C, Delgado O, Dugan-Rocha S, Miner G, Morgan M, Hawes A, Gill R, Celera, Holt RA, Adams MD, Amanatides PG, Baden-Tillson H, Barnstead M, Chin S, Evans CA, Ferriera S, Fosler C, Glodek A, Gu Z, Jennings D, Kraft CL, Nguyen T, Pfannkoch CM, Sitter C, Sutton GG, Venter JC, Woodage T, Smith D, Lee HM, Gustafson E, Cahill P, Kana A, Doucette-Stamm L, Weinstock K, Fectel K, Weiss RB, Dunn DM, Green ED, Blakesley RW, Bouffard GG, De Jong PJ, Osoegawa K, Zhu B, Marra M, Schein J, Bosdet I, Fjell C, Jones S, Krzywinski M, Mathewson C, Siddiqui A, Wye N, McPherson J, Zhao S, Fraser CM, Shetty J, Shatsman S, Geer K, Chen Y, Abramzon S, Nierman WC, Havlak PH, Chen R, Durbin KJ, Egan A, Ren Y, Song XZ, Li B, Liu Y, Qin X, Cawley S, Cooney AJ, D'Souza LM, Martin K, Wu JQ, Gonzalez-Garay ML, Jackson AR, Kalafus KJ, McLeod MP, Milosavljevic A, Virk D, Volkov A, Wheeler DA, Zhang Z, Bailey JA,

Eichler EE, Tuzun E, Birney E, Mongin E, Ureta-Vidal A, Woodwark C, Zdobnov E, Bork P, Suyama M, Torrents D, Alexandersson M, Trask BJ, Young JM, Huang H, Wang H, Xing H, Daniels S, Gietzen D, Schmidt J, Stevens K, Vitt U, Wingrove J, Camara F, Mar Alba M, Abril JF, Guigo R, Smit A, Dubchak I, Rubin EM, Couronne O, Poliakov A, Hubner N, Ganten D, Goesele C, Hummel O, Kreitler T, Lee YA, Monti J, Schulz H, Zimdahl H, Himmelbauer H, Lehrach H, Jacob HJ, Bromberg S, Gullings-Handley J, Jensen-Seaman MI, Kwitek AE, Lazar J, Pasko D, Tonellato PJ, Twigger S, Ponting CP, Duarte JM, Rice S, Goodstadt L, Beatson SA, Emes RD, Winter EE, Webber C, Brandt P, Nyakatura G, Adetobi M, Chiaromonte F, Elnitski L, Eswara P, Hardison RC, Hou M, Kolbe D, Makova K, Miller W, Nekrutenko A, Riemer C, Schwartz S, Taylor J, Yang S, Zhang Y, Lindpaintner K, Andrews TD, Caccamo M, Clamp M, Clarke L, Curwen V, Durbin R, Eyras E, Searle SM, Cooper GM, Batzoglou S, Brudno M, Sidow A, Stone EA, Payseur BA, Bourque G, Lopez-Otin C, Puente XS, Chakrabarti K, Chatterji S, Dewey C, Pachter L, Bray N, Yap VB, Caspi A, Tesler G, Pevzner PA, Haussler D, Roskin KM, Baertsch R, Clawson H, Furey TS, Hinrichs AS, Karolchik D, Kent WJ, Rosenbloom KR, Trumbower H, Weirauch M, Cooper DN, Stenson PD, Ma B, Brent M, Arumugam M, Shteynberg D, Copley RR, Taylor MS, Riethman H, Mudunuri U, Peterson J, Guyer M, Felsenfeld A, Old S, Mockrin S, Collins F. Genome sequence of the brown norway rat yields insights into mammalian evolution. *Nature*. 2004;428:493-521

Supplementary Table S1. List of genes that are located in the line C congenic region.

| Gene Symbol         | Gene Name                                                            | Chromosome | Start      | Stop       |
|---------------------|----------------------------------------------------------------------|------------|------------|------------|
| <i>RGD1560686</i>   | similar to sidekick 1                                                | 12         | 12,804,028 | 13,799,554 |
| <i>LOC679733</i>    | similar to <i>Saccharomyces cerevisiae</i> Nip7p homolog             | 12         | 13,856,711 | 13,857,232 |
| <i>LOC679750</i>    | similar to Salivary gland secretion 1 CG3047-PA                      | 12         | 13,992,273 | 14,001,829 |
| <i>LOC100363332</i> | caspase recruitment domain family, member 11                         | 12         | 14,165,040 | 14,229,267 |
| <i>Gna12</i>        | guanine nucleotide binding protein (G protein) alpha 12              | 12         | 14,275,708 | 14,354,843 |
| <i>LOC100363385</i> | hypothetical protein LOC100363385                                    | 12         | 14,353,761 | 14,355,027 |
| <i>Amz1</i>         | archaelysin family metalloproteinase 1                               | 12         | 14,362,469 | 14,380,322 |
| <i>RGD1565146</i>   | similar to hypothetical gene supported by AF226663                   | 12         | 14,400,221 | 14,411,251 |
| <i>lqce</i>         | IQ motif containing E                                                | 12         | 14,414,172 | 14,451,362 |
| <i>Ttyh3</i>        | tweety homolog 3 ( <i>Drosophila</i> )                               | 12         | 14,463,541 | 14,491,939 |
| <i>Lfng</i>         | LFNG O-fucosylpeptide 3-beta-N-acetylglucosaminyltransferase         | 12         | 14,497,704 | 14,505,723 |
| <i>Grifin</i>       | galectin-related inter-fiber protein                                 | 12         | 14,547,385 | 14,549,367 |
| <i>Chst12</i>       | carbohydrate (chondroitin 4) sulfotransferase 12                     | 12         | 14,577,440 | 14,579,051 |
| <i>LOC679924</i>    | similar to Kif19A CG9913-PB, isoform B                               | 12         | 14,617,651 | 14,664,219 |
| <i>Eif3b</i>        | eukaryotic translation initiation factor 3, subunit B                | 12         | 14,666,974 | 14,692,130 |
| <i>Snx8</i>         | sorting nexin 8                                                      | 12         | 14,724,880 | 14,773,455 |
| <i>Nudt1</i>        | nudix (nucleoside diphosphate linked moiety X)-type motif 1          | 12         | 14,775,536 | 14,778,845 |
| <i>Ftsj2</i>        | FtsJ homolog 2 ( <i>E. coli</i> )                                    | 12         | 14,782,565 | 14,787,472 |
| <i>Mad111</i>       | MAD1 mitotic arrest deficient-like 1 (yeast)                         | 12         | 14,793,899 | 15,107,476 |
| <i>Ppp1r28</i>      | protein phosphatase 1, regulatory subunit 28                         | 12         | 15,136,816 | 15,201,367 |
| <i>LOC680028</i>    | hypothetical protein LOC680028                                       | 12         | 15,196,996 | 15,197,190 |
| <i>LOC100361517</i> | proteasome (prosome, macropain) assembly chaperone 3-like            | 12         | 15,287,238 | 15,290,127 |
| <i>Tmem184a</i>     | transmembrane protein 184A                                           | 12         | 15,301,547 | 15,309,858 |
|                     | v-maf musculoaponeurotic fibrosarcoma oncogene homolog K             |            |            |            |
| <i>Mafk</i>         | (avian)                                                              | 12         | 15,312,420 | 15,323,137 |
| <i>RGD1308908</i>   | similar to KIAA1440 protein                                          | 12         | 15,339,114 | 15,364,370 |
| <i>Micall2</i>      | MICAL-like 2                                                         | 12         | 15,377,780 | 15,406,394 |
| <i>Uncx</i>         | UNC homeobox                                                         | 12         | 15,576,541 | 15,581,062 |
| <i>LOC498152</i>    | hypothetical protein LOC498152                                       | 12         | 15,604,958 | 15,642,276 |
| <i>Zfand2a</i>      | zinc finger, AN1-type domain 2A                                      | 12         | 15,661,609 | 15,672,672 |
| <i>LOC498154</i>    | hypothetical protein LOC498154                                       | 12         | 15,686,414 | 15,789,818 |
| <i>Gper</i>         | G protein-coupled estrogen receptor 1                                | 12         | 15,718,615 | 15,719,893 |
| <i>Gpr146</i>       | G protein-coupled receptor 146                                       | 12         | 15,754,815 | 15,767,922 |
| <i>Cyp2w1</i>       | cytochrome P450, family 2, subfamily w, polypeptide 1                | 12         | 15,792,480 | 15,797,202 |
| <i>Cox19</i>        | COX19 cytochrome c oxidase assembly homolog ( <i>S. cerevisiae</i> ) | 12         | 15,804,279 | 15,812,139 |
| <i>Adap1</i>        | ArfGAP with dual PH domains 1                                        | 12         | 15,825,017 | 15,877,643 |
| <i>Get4</i>         | golgi to ER traffic protein 4 homolog ( <i>S. cerevisiae</i> )       | 12         | 15,878,543 | 15,895,587 |
| <i>Sun1</i>         | Sad1 and UNC84 domain containing 1                                   | 12         | 15,899,105 | 15,931,964 |
| <i>Heatr2</i>       | HEAT repeat containing 2                                             | 12         | 15,955,971 | 15,994,971 |
| <i>Prkar1b</i>      | protein kinase, cAMP dependent regulatory, type I, beta              | 12         | 16,025,867 | 16,131,129 |
| <i>Pdgfa</i>        | platelet-derived growth factor alpha polypeptide                     | 12         | 16,151,045 | 16,172,412 |
| <i>LOC498155</i>    | LRRGT00167                                                           | 12         | 16,238,088 | 16,293,427 |
|                     | similar to Forkhead box protein L1 (Forkhead-related protein         |            |            |            |
| <i>LOC680273</i>    | FKHL11) (Forkhead-related transcription factor 7) (FREAC-7)          | 12         | 16,332,382 | 16,334,529 |
| <i>Fam20c</i>       | family with sequence similarity 20, member C                         | 12         | 16,340,407 | 16,399,325 |
| <i>RGD1566386</i>   | similar to Hypothetical protein A430033K04                           | 12         | 16,486,311 | 16,521,305 |
| <i>Zfp68</i>        | zinc finger protein 68                                               | 12         | 16,534,544 | 16,549,408 |
| <i>RGD1562569</i>   | similar to ribosomal protein S8                                      | 12         | 16,556,461 | 16,557,100 |
| <i>Vom2r-ps98</i>   | vomer nasal 2 receptor, pseudogene 98                                | 12         | 16,573,329 | 16,575,298 |

|                     |                                                                            |    |            |            |
|---------------------|----------------------------------------------------------------------------|----|------------|------------|
| <i>RGD1560412</i>   | similar to Leukosialin precursor (Leucocyte sialoglycoprotein)             | 12 | 16,603,488 | 16,604,704 |
| <i>RGD1566324</i>   | similar to Leukosialin precursor (Leucocyte sialoglycoprotein)             | 12 | 16,609,166 | 16,610,207 |
| <i>LOC501810</i>    | similar to Leukosialin precursor (Leucocyte sialoglycoprotein)             | 12 | 16,614,453 | 16,615,487 |
| <i>LOC100361826</i> | (Sialophorin) (Ly-48) (B cell differentiation antigen LP-3) (CD43 antigen) | 12 | 16,619,650 | 16,624,487 |
| <i>LOC501811</i>    | sialophorin-like                                                           | 12 | 16,624,843 | 16,625,910 |
| <i>MGC112692</i>    | similar to Leukosialin precursor (Leucocyte sialoglycoprotein)             | 12 | 16,634,927 | 16,639,883 |
| <i>LOC501812</i>    | (Sialophorin) (CD43) (W3/13 antigen)                                       | 12 | 16,640,231 | 16,641,257 |
| <i>LOC288521</i>    | similar to Leukosialin precursor (Leucocyte sialoglycoprotein)             | 12 | 16,645,358 | 16,656,498 |
| <i>LOC501813</i>    | (Sialophorin) (Ly-48) (B cell differentiation antigen LP-3) (CD43 antigen) | 12 | 16,656,848 | 16,657,883 |
| <i>RGD1560474</i>   | similar to Leukosialin precursor (Leucocyte sialoglycoprotein)             | 12 | 16,663,607 | 16,664,763 |
| <i>LOC680456</i>    | similar to autism susceptibility candidate 2                               | 12 | 16,708,817 | 16,732,567 |
| <i>Zfp157</i>       | zinc finger protein 157                                                    | 12 | 16,757,409 | 16,780,022 |
| <i>Olr1573-ps</i>   | olfactory receptor pseudogene 1573                                         | 12 | 16,796,234 | 16,796,824 |
| <i>Dhrsx</i>        | dehydrogenase/reductase (SDR family) X-linked                              | 12 | 16,807,161 | 16,810,619 |
| <i>Asmt</i>         | acetylserotonin O-methyltransferase                                        | 12 | 16,811,892 | 16,817,186 |
| <i>Akap17a</i>      | A kinase (PRKA) anchor protein 17A                                         | 12 | 16,818,052 | 16,822,097 |
| <i>Asmtl</i>        | acetylserotonin O-methyltransferase-like                                   | 12 | 16,824,865 | 16,825,701 |
| <i>Il3ra</i>        | interleukin 3 receptor, alpha                                              | 12 | 16,825,702 | 16,830,035 |
| <i>RGD1560288</i>   | similar to DNA segment, Chr 19, Brigham & Womens Genetics 1357 expressed   | 12 | 16,878,632 | 16,889,305 |
| <i>Olr1574-ps</i>   | olfactory receptor pseudogene 1574                                         | 12 | 17,142,878 | 17,143,922 |
| <i>Cyp3a9</i>       | cytochrome P450, family 3, subfamily a, polypeptide 9                      | 12 | 17,164,384 | 17,204,589 |
| <i>Vamp7</i>        | vesicle-associated membrane protein 7                                      | 12 | 17,248,700 | 17,278,193 |
| <i>Spry3</i>        | sprouty homolog 3 (Drosophila)                                             | 12 | 17,343,080 | 17,344,990 |
| <i>LOC363883</i>    | similar to dopamine-responsive protein                                     | 12 | 17,386,796 | 17,387,837 |
| <i>LOC100361974</i> | ribosomal protein L31-like                                                 | 12 | 17,453,648 | 17,454,084 |
| <i>Gjc3</i>         | gap junction protein, gamma 3                                              | 12 | 17,460,857 | 17,487,768 |
| <i>RGD1564846</i>   | similar to RIKEN cDNA 2310015N07                                           | 12 | 17,465,911 | 17,468,956 |
| <i>Azgp1</i>        | alpha-2-glycoprotein 1, zinc-binding                                       | 12 | 17,492,913 | 17,498,949 |
| <i>LOC100362036</i> | ribosomal protein L34-like                                                 | 12 | 17,527,944 | 17,528,286 |
| <i>Zkscan1</i>      | zinc finger with KRAB and SCAN domains 1                                   | 12 | 17,530,383 | 17,546,785 |
| <i>LOC680767</i>    | similar to transcription elongation factor B (SIII), polypeptide 1         | 12 | 17,553,581 | 17,553,919 |
| <i>Zscan21</i>      | zinc finger and SCAN domain containing 21                                  | 12 | 17,562,312 | 17,578,086 |
| <i>LOC680790</i>    | similar to Nhp2 non-histone chromosome protein 2-like 1                    | 12 | 17,582,867 | 17,583,242 |
| <i>Cops6</i>        | COP9 constitutive photomorphogenic homolog subunit 6 (Arabidopsis)         | 12 | 17,604,017 | 17,606,856 |
| <i>Mcm7</i>         | minichromosome maintenance complex component 7                             | 12 | 17,607,250 | 17,614,508 |
| <i>Ap4m1</i>        | adaptor-related protein complex 4, mu 1 subunit                            | 12 | 17,614,882 | 17,620,773 |
| <i>Taf6</i>         | TAF6 RNA polymerase II, TATA box binding protein (TBP)-associated factor   | 12 | 17,620,900 | 17,629,268 |
| <i>Cnpy4</i>        | canopy 4 homolog (zebrafish)                                               | 12 | 17,629,658 | 17,635,758 |
| <i>Mblac1</i>       | metallo-beta-lactamase domain containing 1                                 | 12 | 17,636,473 | 17,637,735 |
| <i>LOC680711</i>    | hypothetical protein LOC680711                                             | 12 | 17,662,584 | 17,674,137 |

|                     |                                                             |    |            |            |
|---------------------|-------------------------------------------------------------|----|------------|------------|
| <i>LOC680825</i>    | hypothetical protein LOC680825                              | 12 | 17,689,073 | 17,707,343 |
| <i>LOC680837</i>    | hypothetical protein LOC680837                              | 12 | 17,718,578 | 17,719,599 |
| <i>RGD1559954</i>   | similar to family with sequence similarity 55, member C     | 12 | 17,760,815 | 17,777,085 |
| <i>RGD1564217</i>   | similar to family with sequence similarity 55, member C     | 12 | 17,782,727 | 17,806,340 |
| <i>RGD1562319</i>   | similar to family with sequence similarity 55, member C     | 12 | 17,819,106 | 17,833,317 |
| <i>RGD1309735</i>   | similar to CG14977-PA                                       | 12 | 17,839,249 | 17,843,070 |
| <i>RGD1305455</i>   | similar to hypothetical protein FLJ10925                    | 12 | 17,843,341 | 17,847,631 |
| <i>Gal3st4</i>      | galactose-3-O-sulfotransferase 4                            | 12 | 17,848,556 | 17,857,313 |
| <i>Gpc2</i>         | glypican 2                                                  | 12 | 17,858,354 | 17,864,687 |
| <i>Stag3</i>        | stromal antigen 3                                           | 12 | 17,865,273 | 17,896,993 |
| <i>LOC680923</i>    | similar to paired immunoglobulin-like type 2 receptor beta  | 12 | 17,946,826 | 17,975,559 |
| <i>RGD1559588</i>   | similar to cell surface receptor FDFACT                     | 12 | 17,981,785 | 17,984,938 |
| <i>Vom2r61</i>      | vomeronasal 2 receptor, 61                                  | 12 | 18,021,620 | 18,048,363 |
| <i>LOC100362404</i> | paired immunoglobulin-like type 2 receptor beta 2           | 12 | 18,075,785 | 18,080,278 |
| <i>Vom2r62</i>      | vomeronasal 2 receptor, 62                                  | 12 | 18,107,411 | 18,124,977 |
| <i>Vom2r-ps99</i>   | vomeronasal 2 receptor, pseudogene 99                       | 12 | 18,166,814 | 18,200,879 |
| <i>Vom2r63</i>      | vomeronasal 2 receptor, 63                                  | 12 | 18,210,310 | 18,239,240 |
| <i>LOC681035</i>    | similar to paired immunoglobulin-like type 2 receptor beta  | 12 | 18,568,780 | 18,573,264 |
| <i>RGD1563400</i>   | similar to paired immunoglobulin-like type 2 receptor beta  | 12 | 18,574,807 | 18,582,256 |
| <i>LOC681069</i>    | similar to paired immunoglobulin-like type 2 receptor beta  | 12 | 18,630,556 | 18,637,912 |
| <i>Vom2r-ps100</i>  | vomeronasal 2 receptor, pseudogene 100                      | 12 | 18,674,488 | 18,688,606 |
| <i>Vom2r64</i>      | vomeronasal 2 receptor, 64                                  | 12 | 18,701,953 | 18,732,104 |
| <i>Vom2r-ps101</i>  | vomeronasal 2 receptor, pseudogene 101                      | 12 | 18,765,220 | 18,776,171 |
| <i>Vom2r-ps102</i>  | vomeronasal 2 receptor, pseudogene 102                      | 12 | 18,830,028 | 18,840,812 |
| <i>Vom2r-ps103</i>  | vomeronasal 2 receptor, pseudogene 103                      | 12 | 18,844,617 | 18,863,789 |
| <i>LOC100360108</i> | cell surface receptor FDFACT-like                           | 12 | 18,890,150 | 18,892,671 |
| <i>RGD1559499</i>   | similar to cell surface receptor FDFACT                     | 12 | 18,896,828 | 18,899,948 |
| <i>RGD1560281</i>   | similar to cell surface receptor FDFACT                     | 12 | 18,926,184 | 18,931,430 |
| <i>RGD1559677</i>   | similar to cell surface receptor FDFACT                     | 12 | 18,932,918 | 18,942,687 |
| <i>LOC681182</i>    | similar to paired immunoglobulin-like type 2 receptor beta  | 12 | 18,994,131 | 19,000,080 |
| <i>LOC681196</i>    | similar to paired immunoglobulin-like type 2 receptor beta  | 12 | 19,045,486 | 19,079,185 |
| <i>LOC681213</i>    | similar to paired immunoglobulin-like type 2 receptor alpha | 12 | 19,058,050 | 19,072,797 |
| <i>RGD1565670</i>   | similar to cell surface receptor FDFACT                     | 12 | 19,084,811 | 19,093,202 |
| <i>LOC681238</i>    | similar to paired immunoglobulin-like type 2 receptor beta  | 12 | 19,094,558 | 19,099,939 |
| <i>LOC681248</i>    | similar to paired immunoglobulin-like type 2 receptor beta  | 12 | 19,127,617 | 19,132,998 |
| <i>LOC681266</i>    | similar to paired immunoglobulin-like type 2 receptor beta  | 12 | 19,134,350 | 19,142,741 |
| <i>LOC681277</i>    | similar to paired immunoglobulin-like type 2 receptor alpha | 12 | 19,167,490 | 19,170,750 |
| <i>LOC363894</i>    | similar to paired immunoglobulin-like type 2 receptor beta  | 12 | 19,195,520 | 19,198,637 |
| <i>Vom2r-ps104</i>  | vomeronasal 2 receptor, pseudogene 104                      | 12 | 19,234,764 | 19,252,481 |
| <i>Vom2r-ps106</i>  | vomeronasal 2 receptor, pseudogene 106                      | 12 | 19,275,802 | 19,301,682 |
| <i>Vom2r-ps105</i>  | vomeronasal 2 receptor, pseudogene 105                      | 12 | 19,314,635 | 19,392,099 |
| <i>Vom2r-ps107</i>  | vomeronasal 2 receptor, pseudogene 107                      | 12 | 19,391,191 | 19,392,090 |
| <i>Vom2r-ps108</i>  | vomeronasal 2 receptor, pseudogene 108                      | 12 | 19,415,245 | 19,430,492 |
| <i>LOC681341</i>    | similar to paired immunoglobulin-like type 2 receptor beta  | 12 | 19,463,192 | 19,469,141 |
| <i>Zan</i>          | zonadhesin                                                  | 12 | 19,534,110 | 19,544,674 |

Supplementary Table S2. List of all variants located within the line C congenic region

| Gene Symbol | Ensembl ID         | Position   | Function   | Ref nt | Var nt | Ref aa | Var aa |
|-------------|--------------------|------------|------------|--------|--------|--------|--------|
| F1M749_RAT  | ENSRNOT00000060520 | 13,400,109 | DOWNSTREAM | C      | T      | -      | -      |
| F1M749_RAT  | ENSRNOT00000060520 | 13,400,886 | INTRONIC   | T      | G      | -      | -      |
| F1M749_RAT  | ENSRNOT00000060520 | 13,400,900 | INTRONIC   | T      | C      | -      | -      |
| F1M749_RAT  | ENSRNOT00000060520 | 13,401,100 | INTRONIC   | A      | G      | -      | -      |
| F1M749_RAT  | ENSRNOT00000060520 | 13,402,359 | INTRONIC   | G      | A      | -      | -      |
| F1M749_RAT  | ENSRNOT00000060520 | 13,402,590 | INTRONIC   | C      | T      | -      | -      |
| F1M749_RAT  | ENSRNOT00000060520 | 13,404,578 | INTRONIC   | T      | G      | -      | -      |
| F1M749_RAT  | ENSRNOT00000060520 | 13,404,811 | INTRONIC   | G      | A      | -      | -      |
| F1M749_RAT  | ENSRNOT00000060520 | 13,404,813 | INTRONIC   | G      | A      | -      | -      |
| F1M749_RAT  | ENSRNOT00000060520 | 13,405,044 | INTRONIC   | T      | C      | -      | -      |
| F1M749_RAT  | ENSRNOT00000060520 | 13,405,075 | INTRONIC   | T      | C      | -      | -      |
| F1M749_RAT  | ENSRNOT00000060520 | 13,405,396 | INTRONIC   | T      | G      | -      | -      |
| F1M749_RAT  | ENSRNOT00000060520 | 13,405,411 | INTRONIC   | C      | T      | -      | -      |
| F1M749_RAT  | ENSRNOT00000060520 | 13,405,471 | INTRONIC   | T      | C      | -      | -      |
| F1M749_RAT  | ENSRNOT00000060520 | 13,405,476 | INTRONIC   | T      | A      | -      | -      |
| F1M749_RAT  | ENSRNOT00000060520 | 13,405,674 | INTRONIC   | A      | C      | -      | -      |
| F1M749_RAT  | ENSRNOT00000060520 | 13,405,890 | INTRONIC   | G      | A      | -      | -      |
| F1M749_RAT  | ENSRNOT00000060520 | 13,406,282 | INTRONIC   | C      | T      | -      | -      |
| F1M749_RAT  | ENSRNOT00000060520 | 13,406,419 | INTRONIC   | C      | T      | -      | -      |
| F1M749_RAT  | ENSRNOT00000060520 | 13,406,540 | INTRONIC   | C      | T      | -      | -      |
| F1M749_RAT  | ENSRNOT00000060520 | 13,406,573 | INTRONIC   | T      | C      | -      | -      |
| F1M749_RAT  | ENSRNOT00000060520 | 13,406,627 | INTRONIC   | G      | A      | -      | -      |
| F1M749_RAT  | ENSRNOT00000060520 | 13,406,658 | INTRONIC   | C      | T      | -      | -      |
| F1M749_RAT  | ENSRNOT00000060520 | 13,407,038 | INTRONIC   | T      | C      | -      | -      |
| F1M749_RAT  | ENSRNOT00000060520 | 13,407,112 | INTRONIC   | A      | G      | -      | -      |
| F1M749_RAT  | ENSRNOT00000060520 | 13,407,260 | INTRONIC   | T      | A      | -      | -      |
| F1M749_RAT  | ENSRNOT00000060520 | 13,407,412 | INTRONIC   | G      | C      | -      | -      |
| F1M749_RAT  | ENSRNOT00000060520 | 13,407,448 | INTRONIC   | C      | T      | -      | -      |
| F1M749_RAT  | ENSRNOT00000060520 | 13,407,482 | INTRONIC   | G      | T      | -      | -      |
| F1M749_RAT  | ENSRNOT00000060520 | 13,407,745 | INTRONIC   | T      | A      | -      | -      |
| F1M749_RAT  | ENSRNOT00000060520 | 13,407,996 | INTRONIC   | A      | C      | -      | -      |
| F1M749_RAT  | ENSRNOT00000060520 | 13,408,000 | INTRONIC   | C      | T      | -      | -      |
| F1M749_RAT  | ENSRNOT00000060520 | 13,408,701 | INTRONIC   | T      | C      | -      | -      |
| F1M749_RAT  | ENSRNOT00000060520 | 13,408,708 | INTRONIC   | G      | A      | -      | -      |
| F1M749_RAT  | ENSRNOT00000060520 | 13,408,723 | INTRONIC   | C      | T      | -      | -      |
| F1M749_RAT  | ENSRNOT00000060520 | 13,408,729 | INTRONIC   | G      | T      | -      | -      |
| F1M749_RAT  | ENSRNOT00000060520 | 13,408,780 | INTRONIC   | C      | T      | -      | -      |
| F1M749_RAT  | ENSRNOT00000060520 | 13,408,820 | INTRONIC   | G      | A      | -      | -      |
| F1M749_RAT  | ENSRNOT00000060520 | 13,408,836 | INTRONIC   | G      | A      | -      | -      |
| F1M749_RAT  | ENSRNOT00000060520 | 13,408,844 | INTRONIC   | A      | T      | -      | -      |
| F1M749_RAT  | ENSRNOT00000060520 | 13,408,846 | INTRONIC   | A      | G      | -      | -      |
| F1M749_RAT  | ENSRNOT00000060520 | 13,408,926 | INTRONIC   | A      | G      | -      | -      |
| F1M749_RAT  | ENSRNOT00000060520 | 13,408,945 | INTRONIC   | G      | A      | -      | -      |
| F1M749_RAT  | ENSRNOT00000060520 | 13,408,960 | INTRONIC   | T      | G      | -      | -      |
| F1M749_RAT  | ENSRNOT00000060520 | 13,408,993 | INTRONIC   | T      | C      | -      | -      |
| F1M749_RAT  | ENSRNOT00000060520 | 13,409,121 | INTRONIC   | T      | C      | -      | -      |
| F1M749_RAT  | ENSRNOT00000060520 | 13,409,216 | INTRONIC   | T      | C      | -      | -      |
| F1M749_RAT  | ENSRNOT00000060520 | 13,409,270 | INTRONIC   | C      | T      | -      | -      |
| F1M749_RAT  | ENSRNOT00000060520 | 13,409,369 | INTRONIC   | G      | C      | -      | -      |
| F1M749_RAT  | ENSRNOT00000060520 | 13,409,433 | INTRONIC   | A      | G      | -      | -      |
| F1M749_RAT  | ENSRNOT00000060520 | 13,409,758 | INTRONIC   | A      | C      | -      | -      |
| F1M749_RAT  | ENSRNOT00000060520 | 13,410,203 | INTRONIC   | T      | G      | -      | -      |
| F1M749_RAT  | ENSRNOT00000060520 | 13,410,217 | INTRONIC   | G      | A      | -      | -      |
| F1M749_RAT  | ENSRNOT00000060520 | 13,410,250 | INTRONIC   | G      | A      | -      | -      |
| F1M749_RAT  | ENSRNOT00000060520 | 13,410,268 | INTRONIC   | A      | T      | -      | -      |
| F1M749_RAT  | ENSRNOT00000060520 | 13,410,369 | INTRONIC   | G      | A      | -      | -      |
| F1M749_RAT  | ENSRNOT00000060520 | 13,410,372 | INTRONIC   | C      | G      | -      | -      |
| F1M749_RAT  | ENSRNOT00000060520 | 13,410,403 | INTRONIC   | A      | G      | -      | -      |
| F1M749_RAT  | ENSRNOT00000060520 | 13,410,436 | INTRONIC   | A      | G      | -      | -      |
| F1M749_RAT  | ENSRNOT00000060520 | 13,410,457 | INTRONIC   | T      | C      | -      | -      |
| F1M749_RAT  | ENSRNOT00000060520 | 13,410,579 | INTRONIC   | G      | A      | -      | -      |
| F1M749_RAT  | ENSRNOT00000060520 | 13,410,609 | INTRONIC   | C      | T      | -      | -      |
| F1M749_RAT  | ENSRNOT00000060520 | 13,410,695 | INTRONIC   | G      | T      | -      | -      |
| F1M749_RAT  | ENSRNOT00000060520 | 13,410,696 | INTRONIC   | A      | T      | -      | -      |
| F1M749_RAT  | ENSRNOT00000060520 | 13,410,908 | INTRONIC   | A      | G      | -      | -      |
| F1M749_RAT  | ENSRNOT00000060520 | 13,410,981 | INTRONIC   | C      | T      | -      | -      |
| F1M749_RAT  | ENSRNOT00000060520 | 13,411,190 | INTRONIC   | T      | G      | -      | -      |
| F1M749_RAT  | ENSRNOT00000060520 | 13,411,431 | INTRONIC   | C      | T      | -      | -      |
| F1M749_RAT  | ENSRNOT00000060520 | 13,411,527 | INTRONIC   | C      | T      | -      | -      |
| F1M749_RAT  | ENSRNOT00000060520 | 13,411,716 | INTRONIC   | C      | T      | -      | -      |
| F1M749_RAT  | ENSRNOT00000060520 | 13,412,467 | INTRONIC   | G      | C      | -      | -      |
| F1M749_RAT  | ENSRNOT00000060520 | 13,412,582 | INTRONIC   | A      | G      | -      | -      |
| F1M749_RAT  | ENSRNOT00000060520 | 13,413,001 | INTRONIC   | G      | A      | -      | -      |
| F1M749_RAT  | ENSRNOT00000060520 | 13,413,162 | INTRONIC   | C      | A      | -      | -      |
| F1M749_RAT  | ENSRNOT00000060520 | 13,413,356 | INTRONIC   | A      | G      | -      | -      |
| F1M749_RAT  | ENSRNOT00000060520 | 13,415,113 | INTRONIC   | C      | G      | -      | -      |
| F1M749_RAT  | ENSRNOT00000060520 | 13,415,591 | INTRONIC   | C      | T      | -      | -      |
| F1M749_RAT  | ENSRNOT00000060520 | 13,415,603 | INTRONIC   | C      | G      | -      | -      |



|            |                    |            |                        |   |   |   |   |
|------------|--------------------|------------|------------------------|---|---|---|---|
| F1M749_RAT | ENSRNOT00000060520 | 13,417,107 | INTRONIC               | C | T | - | - |
| F1M749_RAT | ENSRNOT00000060520 | 13,417,349 | INTRONIC               | A | G | - | - |
| F1M749_RAT | ENSRNOT00000060520 | 13,417,554 | INTRONIC               | C | T | - | - |
| F1M749_RAT | ENSRNOT00000060520 | 13,418,095 | INTRONIC               | T | G | - | - |
| F1M749_RAT | ENSRNOT00000060520 | 13,418,175 | INTRONIC               | G | A | - | - |
| F1M749_RAT | ENSRNOT00000060520 | 13,418,509 | INTRONIC               | C | T | - | - |
| F1M749_RAT | ENSRNOT00000060520 | 13,421,547 | INTRONIC               | T | C | - | - |
| F1M749_RAT | ENSRNOT00000060520 | 13,421,830 | INTRONIC               | T | G | - | - |
| F1M749_RAT | ENSRNOT00000060520 | 13,421,834 | INTRONIC               | A | C | - | - |
| F1M749_RAT | ENSRNOT00000060520 | 13,422,327 | INTRONIC               | T | G | - | - |
| F1M749_RAT | ENSRNOT00000060520 | 13,422,823 | INTRONIC               | A | G | - | - |
| F1M749_RAT | ENSRNOT00000060520 | 13,422,981 | INTRONIC               | G | A | - | - |
| F1M749_RAT | ENSRNOT00000060520 | 13,424,373 | INTRONIC               | G | C | - | - |
| F1M749_RAT | ENSRNOT00000060520 | 13,424,848 | UPSTREAM               | G | A | - | - |
| F1M749_RAT | ENSRNOT00000060520 | 13,424,861 | UPSTREAM               | T | G | - | - |
| F1M749_RAT | ENSRNOT00000060520 | 13,425,192 | UPSTREAM               | T | C | - | - |
| F1M749_RAT | ENSRNOT00000060520 | 13,425,356 | UPSTREAM               | C | T | - | - |
| F1M749_RAT | ENSRNOT00000060520 | 13,425,733 | UPSTREAM               | T | C | - | - |
| F1M749_RAT | ENSRNOT00000060520 | 13,426,080 | UPSTREAM               | C | T | - | - |
| F1M749_RAT | ENSRNOT00000060520 | 13,426,119 | UPSTREAM               | C | T | - | - |
| F1M749_RAT | ENSRNOT00000060520 | 13,426,431 | UPSTREAM               | A | G | - | - |
| F1M749_RAT | ENSRNOT00000060520 | 13,427,077 | UPSTREAM               | T | C | - | - |
| F1M749_RAT | ENSRNOT00000060520 | 13,427,302 | UPSTREAM               | C | T | - | - |
| F1M749_RAT | ENSRNOT00000060520 | 13,427,659 | UPSTREAM               | G | A | - | - |
| F1M749_RAT | ENSRNOT00000060520 | 13,427,796 | UPSTREAM               | A | G | - | - |
| F1M749_RAT | ENSRNOT00000060520 | 13,428,149 | UPSTREAM               | T | C | - | - |
| F1M749_RAT | ENSRNOT00000060520 | 13,428,273 | UPSTREAM               | G | A | - | - |
| F1M749_RAT | ENSRNOT00000060520 | 13,428,293 | UPSTREAM               | A | G | - | - |
| F1M749_RAT | ENSRNOT00000060520 | 13,428,577 | UPSTREAM               | T | C | - | - |
| F1M749_RAT | ENSRNOT00000060520 | 13,428,887 | UPSTREAM               | T | A | - | - |
| F1M749_RAT | ENSRNOT00000060520 | 13,429,391 | UPSTREAM               | T | A | - | - |
|            | -                  | 13,429,731 | INTERGENIC             | G | C | - | - |
|            | -                  | 13,430,080 | INTERGENIC             | A | G | - | - |
|            | -                  | 13,431,422 | INTERGENIC             | G | A | - | - |
|            | -                  | 13,431,835 | INTERGENIC             | C | A | - | - |
|            | -                  | 13,433,029 | INTERGENIC             | T | C | - | - |
|            | -                  | 13,433,062 | INTERGENIC             | T | C | - | - |
|            | -                  | 13,433,187 | INTERGENIC             | T | C | - | - |
|            | -                  | 13,433,228 | INTERGENIC             | C | T | - | - |
|            | -                  | 13,433,431 | INTERGENIC             | C | T | - | - |
|            | -                  | 13,434,173 | INTERGENIC             | T | C | - | - |
|            | -                  | 13,434,234 | INTERGENIC             | T | C | - | - |
|            | -                  | 13,434,243 | INTERGENIC             | T | C | - | - |
|            | -                  | 13,434,259 | INTERGENIC             | A | C | - | - |
|            | -                  | 13,434,879 | INTERGENIC             | T | A | - | - |
|            | -                  | 13,435,255 | INTERGENIC             | T | C | - | - |
|            | -                  | 13,435,601 | INTERGENIC             | T | A | - | - |
|            | -                  | 13,435,783 | INTERGENIC             | G | A | - | - |
| U6         | ENSRNOT00000069493 | 13,436,306 | UPSTREAM               | A | G | - | - |
| U6         | ENSRNOT00000069493 | 13,436,571 | UPSTREAM               | G | A | - | - |
| U6         | ENSRNOT00000069493 | 13,436,678 | UPSTREAM               | G | C | - | - |
| U6         | ENSRNOT00000069493 | 13,436,771 | UPSTREAM               | A | G | - | - |
| U6         | ENSRNOT00000069493 | 13,436,774 | UPSTREAM               | G | A | - | - |
| U6         | ENSRNOT00000069493 | 13,436,988 | UPSTREAM               | A | G | - | - |
| U6         | ENSRNOT00000069493 | 13,438,150 | UPSTREAM               | C | T | - | - |
| U6         | ENSRNOT00000069493 | 13,438,449 | UPSTREAM               | T | C | - | - |
| U6         | ENSRNOT00000069493 | 13,438,477 | UPSTREAM               | G | C | - | - |
| U6         | ENSRNOT00000069493 | 13,438,489 | UPSTREAM               | A | G | - | - |
| U6         | ENSRNOT00000069493 | 13,438,756 | UPSTREAM               | A | G | - | - |
| U6         | ENSRNOT00000069493 | 13,438,788 | UPSTREAM               | G | A | - | - |
| U6         | ENSRNOT00000069493 | 13,438,805 | UPSTREAM               | G | A | - | - |
| U6         | ENSRNOT00000069493 | 13,438,898 | UPSTREAM               | C | G | - | - |
| U6         | ENSRNOT00000069493 | 13,439,012 | UPSTREAM               | G | A | - | - |
| U6         | ENSRNOT00000069493 | 13,439,331 | UPSTREAM               | C | A | - | - |
| U6         | ENSRNOT00000069493 | 13,439,577 | UPSTREAM               | C | A | - | - |
| U6         | ENSRNOT00000069493 | 13,439,888 | UPSTREAM               | T | G | - | - |
| U6         | ENSRNOT00000069493 | 13,440,088 | UPSTREAM               | T | C | - | - |
| U6         | ENSRNOT00000069493 | 13,440,988 | UPSTREAM               | T | C | - | - |
| U6         | ENSRNOT00000069493 | 13,441,021 | UPSTREAM               | T | G | - | - |
| U6         | ENSRNOT00000069493 | 13,441,040 | UPSTREAM               | T | G | - | - |
| U6         | ENSRNOT00000069493 | 13,441,049 | UPSTREAM               | G | A | - | - |
| U6         | ENSRNOT00000069493 | 13,441,053 | UPSTREAM               | T | C | - | - |
| U6         | ENSRNOT00000069493 | 13,441,079 | UPSTREAM               | A | G | - | - |
| U6         | ENSRNOT00000069493 | 13,441,083 | UPSTREAM               | C | G | - | - |
| U6         | ENSRNOT00000069493 | 13,441,127 | UPSTREAM               | A | G | - | - |
| U6         | ENSRNOT00000069493 | 13,441,156 | WITHIN_NON_CODING_GENE | T | G | - | - |
| U6         | ENSRNOT00000069493 | 13,441,199 | WITHIN_NON_CODING_GENE | G | A | - | - |
| U6         | ENSRNOT00000069493 | 13,445,310 | DOWNSTREAM             | T | C | - | - |
|            | -                  | 13,447,237 | INTERGENIC             | C | A | - | - |
|            | -                  | 13,449,895 | INTERGENIC             | G | A | - | - |

|   |            |            |   |   |   |   |
|---|------------|------------|---|---|---|---|
| - | 13,449,943 | INTERGENIC | A | G | - | - |
| - | 13,451,523 | INTERGENIC | G | A | - | - |
| - | 13,451,529 | INTERGENIC | T | C | - | - |
| - | 13,451,555 | INTERGENIC | A | G | - | - |
| - | 13,451,600 | INTERGENIC | G | A | - | - |
| - | 13,453,566 | INTERGENIC | G | T | - | - |
| - | 13,453,567 | INTERGENIC | T | G | - | - |
| - | 13,454,000 | INTERGENIC | G | A | - | - |
| - | 13,455,158 | INTERGENIC | C | T | - | - |
| - | 13,457,635 | INTERGENIC | T | C | - | - |
| - | 13,458,253 | INTERGENIC | C | T | - | - |
| - | 13,458,508 | INTERGENIC | T | C | - | - |
| - | 13,458,617 | INTERGENIC | T | G | - | - |
| - | 13,459,073 | INTERGENIC | C | A | - | - |
| - | 13,459,545 | INTERGENIC | T | C | - | - |
| - | 13,460,618 | INTERGENIC | C | A | - | - |
| - | 13,461,660 | INTERGENIC | G | A | - | - |
| - | 13,461,676 | INTERGENIC | A | G | - | - |
| - | 13,461,855 | INTERGENIC | C | T | - | - |
| - | 13,462,020 | INTERGENIC | T | C | - | - |
| - | 13,462,568 | INTERGENIC | G | A | - | - |
| - | 13,462,572 | INTERGENIC | A | T | - | - |
| - | 13,462,577 | INTERGENIC | T | A | - | - |
| - | 13,464,256 | INTERGENIC | C | A | - | - |
| - | 13,464,510 | INTERGENIC | G | A | - | - |
| - | 13,464,578 | INTERGENIC | T | G | - | - |
| - | 13,465,384 | INTERGENIC | A | G | - | - |
| - | 13,465,518 | INTERGENIC | C | G | - | - |
| - | 13,466,912 | INTERGENIC | C | T | - | - |
| - | 13,466,994 | INTERGENIC | A | T | - | - |
| - | 13,467,305 | INTERGENIC | A | T | - | - |
| - | 13,467,360 | INTERGENIC | T | C | - | - |
| - | 13,468,670 | INTERGENIC | A | C | - | - |
| - | 13,468,842 | INTERGENIC | C | T | - | - |
| - | 13,468,851 | INTERGENIC | T | C | - | - |
| - | 13,469,151 | INTERGENIC | G | A | - | - |
| - | 13,470,368 | INTERGENIC | C | T | - | - |
| - | 13,471,196 | INTERGENIC | G | A | - | - |
| - | 13,471,248 | INTERGENIC | G | A | - | - |
| - | 13,471,592 | INTERGENIC | C | T | - | - |
| - | 13,471,887 | INTERGENIC | C | T | - | - |
| - | 13,472,177 | INTERGENIC | T | C | - | - |
| - | 13,472,241 | INTERGENIC | G | A | - | - |
| - | 13,472,589 | INTERGENIC | G | T | - | - |
| - | 13,474,229 | INTERGENIC | C | T | - | - |
| - | 13,476,292 | INTERGENIC | A | C | - | - |
| - | 13,478,035 | INTERGENIC | T | C | - | - |
| - | 13,480,224 | INTERGENIC | C | G | - | - |
| - | 13,481,459 | INTERGENIC | A | G | - | - |
| - | 13,481,477 | INTERGENIC | T | C | - | - |
| - | 13,481,536 | INTERGENIC | C | A | - | - |
| - | 13,482,455 | INTERGENIC | C | A | - | - |
| - | 13,483,172 | INTERGENIC | C | T | - | - |
| - | 13,483,591 | INTERGENIC | T | C | - | - |
| - | 13,483,635 | INTERGENIC | T | C | - | - |
| - | 13,483,740 | INTERGENIC | A | C | - | - |
| - | 13,483,743 | INTERGENIC | T | C | - | - |
| - | 13,483,824 | INTERGENIC | C | T | - | - |
| - | 13,483,850 | INTERGENIC | G | A | - | - |
| - | 13,483,861 | INTERGENIC | G | C | - | - |
| - | 13,483,934 | INTERGENIC | T | C | - | - |
| - | 13,484,312 | INTERGENIC | T | C | - | - |
| - | 13,484,491 | INTERGENIC | A | C | - | - |
| - | 13,485,164 | INTERGENIC | C | T | - | - |
| - | 13,485,179 | INTERGENIC | T | C | - | - |
| - | 13,485,379 | INTERGENIC | C | T | - | - |
| - | 13,485,853 | INTERGENIC | G | A | - | - |
| - | 13,485,956 | INTERGENIC | C | G | - | - |
| - | 13,485,963 | INTERGENIC | G | A | - | - |
| - | 13,486,632 | INTERGENIC | G | A | - | - |
| - | 13,487,858 | INTERGENIC | C | G | - | - |
| - | 13,488,340 | INTERGENIC | G | C | - | - |
| - | 13,488,947 | INTERGENIC | T | C | - | - |
| - | 13,489,058 | INTERGENIC | A | T | - | - |
| - | 13,489,246 | INTERGENIC | T | C | - | - |
| - | 13,489,248 | INTERGENIC | G | T | - | - |
| - | 13,489,677 | INTERGENIC | A | G | - | - |
| - | 13,489,689 | INTERGENIC | G | A | - | - |
| - | 13,490,443 | INTERGENIC | T | C | - | - |
| - | 13,490,448 | INTERGENIC | C | T | - | - |

|   |            |            |   |   |   |   |
|---|------------|------------|---|---|---|---|
| - | 13,490,593 | INTERGENIC | C | T | - | - |
| - | 13,490,595 | INTERGENIC | G | T | - | - |
| - | 13,490,667 | INTERGENIC | T | C | - | - |
| - | 13,491,502 | INTERGENIC | C | A | - | - |
| - | 13,492,277 | INTERGENIC | T | A | - | - |
| - | 13,492,461 | INTERGENIC | C | T | - | - |
| - | 13,492,871 | INTERGENIC | G | A | - | - |
| - | 13,493,872 | INTERGENIC | G | A | - | - |
| - | 13,494,115 | INTERGENIC | T | C | - | - |
| - | 13,494,227 | INTERGENIC | G | A | - | - |
| - | 13,494,305 | INTERGENIC | C | T | - | - |
| - | 13,494,848 | INTERGENIC | T | C | - | - |
| - | 13,494,997 | INTERGENIC | C | G | - | - |
| - | 13,495,504 | INTERGENIC | T | G | - | - |
| - | 13,495,721 | INTERGENIC | G | A | - | - |
| - | 13,496,151 | INTERGENIC | C | T | - | - |
| - | 13,496,268 | INTERGENIC | G | A | - | - |
| - | 13,496,286 | INTERGENIC | G | A | - | - |
| - | 13,496,366 | INTERGENIC | G | A | - | - |
| - | 13,498,267 | INTERGENIC | C | T | - | - |
| - | 13,498,745 | INTERGENIC | A | G | - | - |
| - | 13,498,976 | INTERGENIC | G | T | - | - |
| - | 13,499,797 | INTERGENIC | A | G | - | - |
| - | 13,499,820 | INTERGENIC | A | T | - | - |
| - | 13,499,944 | INTERGENIC | G | A | - | - |
| - | 13,499,980 | INTERGENIC | T | C | - | - |
| - | 13,500,149 | INTERGENIC | G | A | - | - |
| - | 13,500,309 | INTERGENIC | G | A | - | - |
| - | 13,500,416 | INTERGENIC | C | T | - | - |
| - | 13,500,433 | INTERGENIC | C | T | - | - |
| - | 13,500,465 | INTERGENIC | A | G | - | - |
| - | 13,500,542 | INTERGENIC | C | T | - | - |
| - | 13,500,611 | INTERGENIC | G | A | - | - |
| - | 13,500,861 | INTERGENIC | T | G | - | - |
| - | 13,501,163 | INTERGENIC | C | T | - | - |
| - | 13,501,321 | INTERGENIC | A | C | - | - |
| - | 13,501,418 | INTERGENIC | G | T | - | - |
| - | 13,501,470 | INTERGENIC | C | T | - | - |
| - | 13,501,568 | INTERGENIC | C | T | - | - |
| - | 13,501,656 | INTERGENIC | T | C | - | - |
| - | 13,501,669 | INTERGENIC | G | A | - | - |
| - | 13,501,905 | INTERGENIC | A | C | - | - |
| - | 13,501,991 | INTERGENIC | C | A | - | - |
| - | 13,502,235 | INTERGENIC | C | T | - | - |
| - | 13,502,593 | INTERGENIC | C | T | - | - |
| - | 13,503,170 | INTERGENIC | C | T | - | - |
| - | 13,503,868 | INTERGENIC | G | T | - | - |
| - | 13,503,894 | INTERGENIC | C | T | - | - |
| - | 13,504,452 | INTERGENIC | G | A | - | - |
| - | 13,504,645 | INTERGENIC | T | C | - | - |
| - | 13,504,652 | INTERGENIC | C | T | - | - |
| - | 13,504,738 | INTERGENIC | C | A | - | - |
| - | 13,504,740 | INTERGENIC | G | A | - | - |
| - | 13,504,876 | INTERGENIC | A | C | - | - |
| - | 13,504,894 | INTERGENIC | C | A | - | - |
| - | 13,505,022 | INTERGENIC | C | G | - | - |
| - | 13,505,065 | INTERGENIC | G | A | - | - |
| - | 13,505,110 | INTERGENIC | C | T | - | - |
| - | 13,505,132 | INTERGENIC | G | C | - | - |
| - | 13,505,205 | INTERGENIC | A | G | - | - |
| - | 13,505,282 | INTERGENIC | G | A | - | - |
| - | 13,505,301 | INTERGENIC | T | C | - | - |
| - | 13,505,304 | INTERGENIC | A | C | - | - |
| - | 13,505,362 | INTERGENIC | A | G | - | - |
| - | 13,505,439 | INTERGENIC | G | T | - | - |
| - | 13,505,621 | INTERGENIC | G | C | - | - |
| - | 13,505,663 | INTERGENIC | T | C | - | - |
| - | 13,505,748 | INTERGENIC | T | C | - | - |
| - | 13,505,787 | INTERGENIC | G | T | - | - |
| - | 13,505,851 | INTERGENIC | C | T | - | - |
| - | 13,505,862 | INTERGENIC | C | A | - | - |
| - | 13,505,982 | INTERGENIC | T | G | - | - |
| - | 13,506,094 | INTERGENIC | T | G | - | - |
| - | 13,506,102 | INTERGENIC | G | A | - | - |
| - | 13,506,133 | INTERGENIC | T | C | - | - |
| - | 13,506,150 | INTERGENIC | G | A | - | - |
| - | 13,506,219 | INTERGENIC | A | G | - | - |
| - | 13,506,339 | INTERGENIC | A | G | - | - |
| - | 13,506,341 | INTERGENIC | A | C | - | - |
| - | 13,506,342 | INTERGENIC | A | C | - | - |

|   |            |            |   |   |   |   |
|---|------------|------------|---|---|---|---|
| - | 13,506,408 | INTERGENIC | T | C | - | - |
| - | 13,506,495 | INTERGENIC | C | T | - | - |
| - | 13,506,502 | INTERGENIC | C | T | - | - |
| - | 13,506,566 | INTERGENIC | A | T | - | - |
| - | 13,506,661 | INTERGENIC | A | G | - | - |
| - | 13,507,466 | INTERGENIC | A | C | - | - |
| - | 13,508,030 | INTERGENIC | T | A | - | - |
| - | 13,508,185 | INTERGENIC | C | T | - | - |
| - | 13,508,254 | INTERGENIC | C | G | - | - |
| - | 13,508,256 | INTERGENIC | C | T | - | - |
| - | 13,508,543 | INTERGENIC | C | T | - | - |
| - | 13,508,844 | INTERGENIC | C | T | - | - |
| - | 13,508,980 | INTERGENIC | A | T | - | - |
| - | 13,509,280 | INTERGENIC | A | G | - | - |
| - | 13,509,297 | INTERGENIC | A | G | - | - |
| - | 13,509,320 | INTERGENIC | A | G | - | - |
| - | 13,509,384 | INTERGENIC | A | G | - | - |
| - | 13,509,387 | INTERGENIC | G | A | - | - |
| - | 13,509,437 | INTERGENIC | T | C | - | - |
| - | 13,509,484 | INTERGENIC | C | T | - | - |
| - | 13,509,532 | INTERGENIC | A | G | - | - |
| - | 13,509,723 | INTERGENIC | G | C | - | - |
| - | 13,509,783 | INTERGENIC | C | T | - | - |
| - | 13,509,834 | INTERGENIC | G | C | - | - |
| - | 13,509,861 | INTERGENIC | A | G | - | - |
| - | 13,509,879 | INTERGENIC | C | A | - | - |
| - | 13,509,912 | INTERGENIC | C | T | - | - |
| - | 13,510,113 | INTERGENIC | G | A | - | - |
| - | 13,510,156 | INTERGENIC | T | A | - | - |
| - | 13,510,332 | INTERGENIC | A | G | - | - |
| - | 13,510,360 | INTERGENIC | T | C | - | - |
| - | 13,510,528 | INTERGENIC | T | G | - | - |
| - | 13,510,586 | INTERGENIC | G | A | - | - |
| - | 13,510,722 | INTERGENIC | A | G | - | - |
| - | 13,510,919 | INTERGENIC | G | A | - | - |
| - | 13,510,935 | INTERGENIC | C | A | - | - |
| - | 13,511,174 | INTERGENIC | A | T | - | - |
| - | 13,511,243 | INTERGENIC | G | A | - | - |
| - | 13,511,368 | INTERGENIC | G | A | - | - |
| - | 13,511,521 | INTERGENIC | T | C | - | - |
| - | 13,511,612 | INTERGENIC | A | G | - | - |
| - | 13,511,666 | INTERGENIC | A | C | - | - |
| - | 13,511,783 | INTERGENIC | C | T | - | - |
| - | 13,512,264 | INTERGENIC | A | G | - | - |
| - | 13,513,244 | INTERGENIC | A | T | - | - |
| - | 13,513,533 | INTERGENIC | T | C | - | - |
| - | 13,513,624 | INTERGENIC | T | C | - | - |
| - | 13,513,681 | INTERGENIC | T | C | - | - |
| - | 13,513,936 | INTERGENIC | C | T | - | - |
| - | 13,514,042 | INTERGENIC | C | A | - | - |
| - | 13,514,784 | INTERGENIC | G | A | - | - |
| - | 13,514,912 | INTERGENIC | A | G | - | - |
| - | 13,515,225 | INTERGENIC | G | C | - | - |
| - | 13,515,366 | INTERGENIC | T | C | - | - |
| - | 13,515,463 | INTERGENIC | T | C | - | - |
| - | 13,515,874 | INTERGENIC | T | C | - | - |
| - | 13,515,929 | INTERGENIC | T | C | - | - |
| - | 13,516,138 | INTERGENIC | T | C | - | - |
| - | 13,516,531 | INTERGENIC | C | T | - | - |
| - | 13,516,969 | INTERGENIC | G | T | - | - |
| - | 13,517,483 | INTERGENIC | A | G | - | - |
| - | 13,517,504 | INTERGENIC | A | G | - | - |
| - | 13,517,550 | INTERGENIC | G | C | - | - |
| - | 13,517,684 | INTERGENIC | G | A | - | - |
| - | 13,517,699 | INTERGENIC | T | C | - | - |
| - | 13,517,739 | INTERGENIC | A | G | - | - |
| - | 13,517,740 | INTERGENIC | C | T | - | - |
| - | 13,518,011 | INTERGENIC | C | T | - | - |
| - | 13,518,350 | INTERGENIC | G | T | - | - |
| - | 13,518,800 | INTERGENIC | A | T | - | - |
| - | 13,518,826 | INTERGENIC | C | G | - | - |
| - | 13,518,840 | INTERGENIC | C | G | - | - |
| - | 13,518,868 | INTERGENIC | C | G | - | - |
| - | 13,519,029 | INTERGENIC | G | A | - | - |
| - | 13,519,165 | INTERGENIC | C | T | - | - |
| - | 13,520,176 | INTERGENIC | A | G | - | - |
| - | 13,520,483 | INTERGENIC | G | C | - | - |
| - | 13,520,498 | INTERGENIC | T | C | - | - |
| - | 13,520,701 | INTERGENIC | C | T | - | - |
| - | 13,520,705 | INTERGENIC | C | T | - | - |

|   |            |            |   |   |   |   |
|---|------------|------------|---|---|---|---|
| - | 13,520,726 | INTERGENIC | G | A | - | - |
| - | 13,520,730 | INTERGENIC | G | A | - | - |
| - | 13,520,783 | INTERGENIC | C | T | - | - |
| - | 13,520,818 | INTERGENIC | T | C | - | - |
| - | 13,520,832 | INTERGENIC | G | A | - | - |
| - | 13,521,221 | INTERGENIC | T | C | - | - |
| - | 13,521,517 | INTERGENIC | T | C | - | - |
| - | 13,522,112 | INTERGENIC | G | A | - | - |
| - | 13,522,178 | INTERGENIC | A | G | - | - |
| - | 13,522,904 | INTERGENIC | A | C | - | - |
| - | 13,522,953 | INTERGENIC | A | G | - | - |
| - | 13,522,970 | INTERGENIC | C | T | - | - |
| - | 13,522,989 | INTERGENIC | A | G | - | - |
| - | 13,523,016 | INTERGENIC | G | A | - | - |
| - | 13,523,030 | INTERGENIC | A | G | - | - |
| - | 13,523,099 | INTERGENIC | T | C | - | - |
| - | 13,523,354 | INTERGENIC | C | T | - | - |
| - | 13,523,372 | INTERGENIC | G | A | - | - |
| - | 13,523,394 | INTERGENIC | G | T | - | - |
| - | 13,523,434 | INTERGENIC | G | A | - | - |
| - | 13,523,488 | INTERGENIC | A | T | - | - |
| - | 13,523,724 | INTERGENIC | G | A | - | - |
| - | 13,523,737 | INTERGENIC | A | G | - | - |
| - | 13,524,237 | INTERGENIC | T | C | - | - |
| - | 13,524,576 | INTERGENIC | C | A | - | - |
| - | 13,524,799 | INTERGENIC | T | C | - | - |
| - | 13,524,840 | INTERGENIC | G | A | - | - |
| - | 13,529,683 | INTERGENIC | T | C | - | - |
| - | 13,530,975 | INTERGENIC | G | C | - | - |
| - | 13,530,991 | INTERGENIC | C | A | - | - |
| - | 13,531,825 | INTERGENIC | T | C | - | - |
| - | 13,532,488 | INTERGENIC | T | C | - | - |
| - | 13,532,503 | INTERGENIC | C | T | - | - |
| - | 13,532,781 | INTERGENIC | A | G | - | - |
| - | 13,534,545 | INTERGENIC | T | G | - | - |
| - | 13,535,242 | INTERGENIC | A | G | - | - |
| - | 13,535,775 | INTERGENIC | C | T | - | - |
| - | 13,535,933 | INTERGENIC | A | G | - | - |
| - | 13,536,462 | INTERGENIC | C | T | - | - |
| - | 13,536,681 | INTERGENIC | T | C | - | - |
| - | 13,537,368 | INTERGENIC | C | A | - | - |
| - | 13,537,607 | INTERGENIC | A | G | - | - |
| - | 13,538,277 | INTERGENIC | T | C | - | - |
| - | 13,538,684 | INTERGENIC | A | G | - | - |
| - | 13,538,920 | INTERGENIC | A | T | - | - |
| - | 13,541,312 | INTERGENIC | T | C | - | - |
| - | 13,542,220 | INTERGENIC | A | G | - | - |
| - | 13,544,274 | INTERGENIC | C | A | - | - |
| - | 13,544,738 | INTERGENIC | T | C | - | - |
| - | 13,544,741 | INTERGENIC | C | T | - | - |
| - | 13,555,503 | INTERGENIC | T | C | - | - |
| - | 13,556,373 | INTERGENIC | A | G | - | - |
| - | 13,556,958 | INTERGENIC | A | G | - | - |
| - | 13,557,908 | INTERGENIC | T | C | - | - |
| - | 13,559,274 | INTERGENIC | A | C | - | - |
| - | 13,559,496 | INTERGENIC | C | T | - | - |
| - | 13,559,507 | INTERGENIC | G | C | - | - |
| - | 13,559,522 | INTERGENIC | G | T | - | - |
| - | 13,560,014 | INTERGENIC | T | C | - | - |
| - | 13,560,079 | INTERGENIC | C | T | - | - |
| - | 13,560,130 | INTERGENIC | C | A | - | - |
| - | 13,561,999 | INTERGENIC | A | G | - | - |
| - | 13,562,001 | INTERGENIC | G | T | - | - |
| - | 13,562,092 | INTERGENIC | G | C | - | - |
| - | 13,562,093 | INTERGENIC | C | A | - | - |
| - | 13,563,667 | INTERGENIC | G | A | - | - |
| - | 13,564,596 | INTERGENIC | A | G | - | - |
| - | 13,568,537 | INTERGENIC | T | A | - | - |
| - | 13,568,539 | INTERGENIC | T | A | - | - |
| - | 13,571,072 | INTERGENIC | A | G | - | - |
| - | 13,571,287 | INTERGENIC | G | A | - | - |
| - | 13,572,441 | INTERGENIC | C | T | - | - |
| - | 13,575,073 | INTERGENIC | A | G | - | - |
| - | 13,576,559 | INTERGENIC | T | C | - | - |
| - | 13,576,591 | INTERGENIC | A | C | - | - |
| - | 13,576,750 | INTERGENIC | A | T | - | - |
| - | 13,579,953 | INTERGENIC | A | G | - | - |
| - | 13,585,626 | INTERGENIC | A | G | - | - |
| - | 13,587,011 | INTERGENIC | A | G | - | - |
| - | 13,587,017 | INTERGENIC | C | T | - | - |

|   |            |            |   |   |   |   |
|---|------------|------------|---|---|---|---|
| - | 13,587,174 | INTERGENIC | C | T | - | - |
| - | 13,588,768 | INTERGENIC | T | C | - | - |
| - | 13,589,118 | INTERGENIC | C | T | - | - |
| - | 13,589,742 | INTERGENIC | G | A | - | - |
| - | 13,590,117 | INTERGENIC | G | A | - | - |
| - | 13,590,734 | INTERGENIC | A | G | - | - |
| - | 13,590,995 | INTERGENIC | A | C | - | - |
| - | 13,591,004 | INTERGENIC | G | A | - | - |
| - | 13,591,504 | INTERGENIC | A | G | - | - |
| - | 13,591,553 | INTERGENIC | C | T | - | - |
| - | 13,591,672 | INTERGENIC | T | G | - | - |
| - | 13,591,794 | INTERGENIC | A | G | - | - |
| - | 13,591,805 | INTERGENIC | C | A | - | - |
| - | 13,591,843 | INTERGENIC | A | G | - | - |
| - | 13,591,872 | INTERGENIC | G | A | - | - |
| - | 13,592,187 | INTERGENIC | T | C | - | - |
| - | 13,592,285 | INTERGENIC | A | G | - | - |
| - | 13,592,331 | INTERGENIC | A | G | - | - |
| - | 13,592,482 | INTERGENIC | C | T | - | - |
| - | 13,592,705 | INTERGENIC | C | T | - | - |
| - | 13,592,924 | INTERGENIC | A | G | - | - |
| - | 13,592,981 | INTERGENIC | T | C | - | - |
| - | 13,593,780 | INTERGENIC | T | C | - | - |
| - | 13,593,932 | INTERGENIC | C | T | - | - |
| - | 13,594,227 | INTERGENIC | A | G | - | - |
| - | 13,595,299 | INTERGENIC | A | G | - | - |
| - | 13,595,509 | INTERGENIC | A | C | - | - |
| - | 13,595,617 | INTERGENIC | G | A | - | - |
| - | 13,595,636 | INTERGENIC | G | A | - | - |
| - | 13,595,858 | INTERGENIC | A | G | - | - |
| - | 13,596,080 | INTERGENIC | C | T | - | - |
| - | 13,596,106 | INTERGENIC | C | T | - | - |
| - | 13,596,813 | INTERGENIC | G | T | - | - |
| - | 13,596,838 | INTERGENIC | A | G | - | - |
| - | 13,597,008 | INTERGENIC | A | G | - | - |
| - | 13,597,103 | INTERGENIC | A | G | - | - |
| - | 13,597,213 | INTERGENIC | A | G | - | - |
| - | 13,597,294 | INTERGENIC | C | A | - | - |
| - | 13,597,561 | INTERGENIC | C | G | - | - |
| - | 13,597,578 | INTERGENIC | T | C | - | - |
| - | 13,597,611 | INTERGENIC | T | C | - | - |
| - | 13,597,761 | INTERGENIC | G | A | - | - |
| - | 13,597,971 | INTERGENIC | T | C | - | - |
| - | 13,598,133 | INTERGENIC | A | G | - | - |
| - | 13,598,237 | INTERGENIC | A | G | - | - |
| - | 13,598,279 | INTERGENIC | T | C | - | - |
| - | 13,598,480 | INTERGENIC | C | T | - | - |
| - | 13,598,660 | INTERGENIC | G | A | - | - |
| - | 13,598,670 | INTERGENIC | G | A | - | - |
| - | 13,598,682 | INTERGENIC | C | T | - | - |
| - | 13,598,755 | INTERGENIC | G | A | - | - |
| - | 13,598,766 | INTERGENIC | G | A | - | - |
| - | 13,598,834 | INTERGENIC | G | T | - | - |
| - | 13,598,991 | INTERGENIC | G | A | - | - |
| - | 13,599,045 | INTERGENIC | A | T | - | - |
| - | 13,599,117 | INTERGENIC | A | G | - | - |
| - | 13,599,209 | INTERGENIC | T | A | - | - |
| - | 13,599,214 | INTERGENIC | A | T | - | - |
| - | 13,599,289 | INTERGENIC | T | C | - | - |
| - | 13,599,414 | INTERGENIC | G | A | - | - |
| - | 13,599,542 | INTERGENIC | G | A | - | - |
| - | 13,599,679 | INTERGENIC | T | C | - | - |
| - | 13,600,078 | INTERGENIC | C | A | - | - |
| - | 13,600,137 | INTERGENIC | C | T | - | - |
| - | 13,600,158 | INTERGENIC | A | G | - | - |
| - | 13,600,179 | INTERGENIC | G | A | - | - |
| - | 13,600,221 | INTERGENIC | A | G | - | - |
| - | 13,600,328 | INTERGENIC | T | G | - | - |
| - | 13,600,388 | INTERGENIC | A | T | - | - |
| - | 13,600,395 | INTERGENIC | T | C | - | - |
| - | 13,600,446 | INTERGENIC | C | T | - | - |
| - | 13,600,459 | INTERGENIC | G | A | - | - |
| - | 13,600,495 | INTERGENIC | G | A | - | - |
| - | 13,600,511 | INTERGENIC | G | T | - | - |
| - | 13,600,536 | INTERGENIC | T | C | - | - |
| - | 13,600,578 | INTERGENIC | A | G | - | - |
| - | 13,600,596 | INTERGENIC | C | T | - | - |
| - | 13,600,663 | INTERGENIC | A | G | - | - |
| - | 13,600,682 | INTERGENIC | G | C | - | - |
| - | 13,600,693 | INTERGENIC | T | G | - | - |

|   |            |            |   |   |   |   |
|---|------------|------------|---|---|---|---|
| - | 13,600,957 | INTERGENIC | A | T | - | - |
| - | 13,600,973 | INTERGENIC | A | G | - | - |
| - | 13,601,242 | INTERGENIC | A | G | - | - |
| - | 13,601,336 | INTERGENIC | C | G | - | - |
| - | 13,601,501 | INTERGENIC | A | G | - | - |
| - | 13,601,512 | INTERGENIC | T | G | - | - |
| - | 13,601,689 | INTERGENIC | A | T | - | - |
| - | 13,602,140 | INTERGENIC | A | C | - | - |
| - | 13,602,203 | INTERGENIC | T | C | - | - |
| - | 13,602,236 | INTERGENIC | T | C | - | - |
| - | 13,602,311 | INTERGENIC | T | C | - | - |
| - | 13,602,341 | INTERGENIC | A | C | - | - |
| - | 13,602,372 | INTERGENIC | T | C | - | - |
| - | 13,603,151 | INTERGENIC | G | A | - | - |
| - | 13,603,160 | INTERGENIC | T | G | - | - |
| - | 13,603,275 | INTERGENIC | G | T | - | - |
| - | 13,603,414 | INTERGENIC | G | T | - | - |
| - | 13,603,422 | INTERGENIC | A | G | - | - |
| - | 13,603,448 | INTERGENIC | G | A | - | - |
| - | 13,603,537 | INTERGENIC | T | G | - | - |
| - | 13,603,612 | INTERGENIC | C | T | - | - |
| - | 13,603,777 | INTERGENIC | G | A | - | - |
| - | 13,603,799 | INTERGENIC | C | T | - | - |
| - | 13,603,874 | INTERGENIC | A | T | - | - |
| - | 13,603,975 | INTERGENIC | C | T | - | - |
| - | 13,603,979 | INTERGENIC | A | G | - | - |
| - | 13,603,992 | INTERGENIC | G | T | - | - |
| - | 13,604,034 | INTERGENIC | G | C | - | - |
| - | 13,604,078 | INTERGENIC | A | G | - | - |
| - | 13,604,119 | INTERGENIC | T | C | - | - |
| - | 13,604,137 | INTERGENIC | T | C | - | - |
| - | 13,604,162 | INTERGENIC | G | A | - | - |
| - | 13,604,552 | INTERGENIC | C | A | - | - |
| - | 13,604,609 | INTERGENIC | C | T | - | - |
| - | 13,604,938 | INTERGENIC | G | A | - | - |
| - | 13,605,172 | INTERGENIC | A | G | - | - |
| - | 13,605,543 | INTERGENIC | C | A | - | - |
| - | 13,606,289 | INTERGENIC | T | C | - | - |
| - | 13,608,383 | INTERGENIC | G | T | - | - |
| - | 13,608,389 | INTERGENIC | T | G | - | - |
| - | 13,609,353 | INTERGENIC | G | A | - | - |
| - | 13,611,027 | INTERGENIC | A | G | - | - |
| - | 13,613,677 | INTERGENIC | G | A | - | - |
| - | 13,615,124 | INTERGENIC | T | C | - | - |
| - | 13,615,267 | INTERGENIC | G | A | - | - |
| - | 13,615,646 | INTERGENIC | A | G | - | - |
| - | 13,617,404 | INTERGENIC | G | A | - | - |
| - | 13,617,624 | INTERGENIC | G | A | - | - |
| - | 13,618,693 | INTERGENIC | T | C | - | - |
| - | 13,619,699 | INTERGENIC | C | T | - | - |
| - | 13,619,776 | INTERGENIC | C | T | - | - |
| - | 13,619,836 | INTERGENIC | G | A | - | - |
| - | 13,619,839 | INTERGENIC | A | T | - | - |
| - | 13,620,090 | INTERGENIC | T | G | - | - |
| - | 13,620,319 | INTERGENIC | C | T | - | - |
| - | 13,620,614 | INTERGENIC | G | A | - | - |
| - | 13,620,892 | INTERGENIC | T | C | - | - |
| - | 13,621,047 | INTERGENIC | G | C | - | - |
| - | 13,621,318 | INTERGENIC | G | C | - | - |
| - | 13,621,345 | INTERGENIC | C | T | - | - |
| - | 13,621,399 | INTERGENIC | G | T | - | - |
| - | 13,621,406 | INTERGENIC | C | T | - | - |
| - | 13,621,455 | INTERGENIC | A | G | - | - |
| - | 13,621,469 | INTERGENIC | T | G | - | - |
| - | 13,624,174 | INTERGENIC | C | T | - | - |
| - | 13,624,508 | INTERGENIC | G | A | - | - |
| - | 13,624,516 | INTERGENIC | C | T | - | - |
| - | 13,624,540 | INTERGENIC | G | C | - | - |
| - | 13,624,637 | INTERGENIC | G | C | - | - |
| - | 13,624,840 | INTERGENIC | C | G | - | - |
| - | 13,625,042 | INTERGENIC | C | T | - | - |
| - | 13,633,555 | INTERGENIC | G | C | - | - |
| - | 13,633,562 | INTERGENIC | C | T | - | - |
| - | 13,635,148 | INTERGENIC | C | T | - | - |
| - | 13,636,279 | INTERGENIC | C | A | - | - |
| - | 13,637,883 | INTERGENIC | C | T | - | - |
| - | 13,650,117 | INTERGENIC | C | T | - | - |
| - | 13,651,117 | INTERGENIC | C | T | - | - |
| - | 13,652,431 | INTERGENIC | C | T | - | - |
| - | 13,665,100 | INTERGENIC | T | A | - | - |

|                    |            |                        |   |   |   |   |
|--------------------|------------|------------------------|---|---|---|---|
| -                  | 13,666,465 | INTERGENIC             | C | A | - | - |
| ENSRNOT00000030304 | 13,669,124 | DOWNSTREAM             | T | A | - | - |
| ENSRNOT00000030304 | 13,672,898 | WITHIN_NON_CODING_GENE | G | A | - | - |
| -                  | 13,682,993 | INTERGENIC             | A | G | - | - |
| -                  | 13,686,211 | INTERGENIC             | T | C | - | - |
| -                  | 13,688,387 | INTERGENIC             | T | C | - | - |
| -                  | 13,694,826 | INTERGENIC             | A | G | - | - |
| -                  | 13,701,903 | INTERGENIC             | A | T | - | - |
| -                  | 13,704,472 | INTERGENIC             | C | T | - | - |
| -                  | 13,711,218 | INTERGENIC             | A | G | - | - |
| -                  | 13,711,886 | INTERGENIC             | C | T | - | - |
| -                  | 13,712,640 | INTERGENIC             | T | A | - | - |
| -                  | 13,713,226 | INTERGENIC             | T | C | - | - |
| -                  | 13,715,542 | INTERGENIC             | T | C | - | - |
| -                  | 13,716,537 | INTERGENIC             | A | G | - | - |
| -                  | 13,717,505 | INTERGENIC             | A | C | - | - |
| -                  | 13,721,196 | INTERGENIC             | A | G | - | - |
| -                  | 13,721,232 | INTERGENIC             | G | A | - | - |
| -                  | 13,721,441 | INTERGENIC             | T | A | - | - |
| -                  | 13,721,853 | INTERGENIC             | T | C | - | - |
| -                  | 13,721,859 | INTERGENIC             | C | T | - | - |
| -                  | 13,721,911 | INTERGENIC             | G | C | - | - |
| -                  | 13,721,987 | INTERGENIC             | T | C | - | - |
| -                  | 13,721,998 | INTERGENIC             | T | C | - | - |
| -                  | 13,722,164 | INTERGENIC             | T | G | - | - |
| -                  | 13,722,229 | INTERGENIC             | G | A | - | - |
| -                  | 13,722,345 | INTERGENIC             | C | T | - | - |
| -                  | 13,722,354 | INTERGENIC             | T | C | - | - |
| -                  | 13,722,528 | INTERGENIC             | G | C | - | - |
| -                  | 13,722,546 | INTERGENIC             | G | C | - | - |
| -                  | 13,722,589 | INTERGENIC             | A | G | - | - |
| -                  | 13,722,696 | INTERGENIC             | G | A | - | - |
| -                  | 13,722,797 | INTERGENIC             | G | T | - | - |
| -                  | 13,722,892 | INTERGENIC             | G | A | - | - |
| -                  | 13,722,937 | INTERGENIC             | C | T | - | - |
| -                  | 13,723,185 | INTERGENIC             | T | A | - | - |
| -                  | 13,723,213 | INTERGENIC             | G | C | - | - |
| -                  | 13,723,248 | INTERGENIC             | C | T | - | - |
| -                  | 13,723,288 | INTERGENIC             | A | C | - | - |
| -                  | 13,723,326 | INTERGENIC             | G | T | - | - |
| -                  | 13,723,376 | INTERGENIC             | G | A | - | - |
| -                  | 13,723,487 | INTERGENIC             | C | T | - | - |
| -                  | 13,723,546 | INTERGENIC             | C | T | - | - |
| -                  | 13,723,589 | INTERGENIC             | T | C | - | - |
| -                  | 13,723,909 | INTERGENIC             | A | T | - | - |
| -                  | 13,723,927 | INTERGENIC             | G | T | - | - |
| -                  | 13,723,985 | INTERGENIC             | T | C | - | - |
| -                  | 13,724,056 | INTERGENIC             | G | A | - | - |
| -                  | 13,724,063 | INTERGENIC             | T | G | - | - |
| -                  | 13,724,083 | INTERGENIC             | G | A | - | - |
| -                  | 13,724,121 | INTERGENIC             | A | T | - | - |
| -                  | 13,724,246 | INTERGENIC             | A | G | - | - |
| -                  | 13,724,473 | INTERGENIC             | C | T | - | - |
| -                  | 13,724,526 | INTERGENIC             | C | A | - | - |
| -                  | 13,724,865 | INTERGENIC             | G | A | - | - |
| -                  | 13,725,089 | INTERGENIC             | A | G | - | - |
| -                  | 13,725,156 | INTERGENIC             | C | T | - | - |
| -                  | 13,725,183 | INTERGENIC             | A | T | - | - |
| -                  | 13,725,184 | INTERGENIC             | T | A | - | - |
| -                  | 13,725,201 | INTERGENIC             | G | A | - | - |
| -                  | 13,725,270 | INTERGENIC             | A | G | - | - |
| -                  | 13,725,325 | INTERGENIC             | A | C | - | - |
| -                  | 13,725,327 | INTERGENIC             | A | C | - | - |
| -                  | 13,725,396 | INTERGENIC             | C | A | - | - |
| -                  | 13,725,530 | INTERGENIC             | A | G | - | - |
| -                  | 13,725,623 | INTERGENIC             | A | T | - | - |
| -                  | 13,726,150 | INTERGENIC             | T | C | - | - |
| -                  | 13,726,319 | INTERGENIC             | A | G | - | - |
| -                  | 13,726,416 | INTERGENIC             | G | A | - | - |
| -                  | 13,726,539 | INTERGENIC             | T | A | - | - |
| -                  | 13,726,543 | INTERGENIC             | T | C | - | - |
| -                  | 13,726,632 | INTERGENIC             | C | G | - | - |
| -                  | 13,727,283 | INTERGENIC             | A | T | - | - |
| -                  | 13,727,303 | INTERGENIC             | G | A | - | - |
| -                  | 13,727,551 | INTERGENIC             | G | C | - | - |
| -                  | 13,727,668 | INTERGENIC             | T | C | - | - |
| -                  | 13,727,985 | INTERGENIC             | G | A | - | - |
| -                  | 13,728,157 | INTERGENIC             | G | A | - | - |
| -                  | 13,728,211 | INTERGENIC             | T | A | - | - |
| -                  | 13,728,281 | INTERGENIC             | C | T | - | - |



|   |            |            |   |   |   |   |
|---|------------|------------|---|---|---|---|
| - | 13,728,883 | INTERGENIC | A | G | - | - |
| - | 13,729,068 | INTERGENIC | A | G | - | - |
| - | 13,729,178 | INTERGENIC | C | T | - | - |
| - | 13,729,220 | INTERGENIC | T | A | - | - |
| - | 13,729,370 | INTERGENIC | T | A | - | - |
| - | 13,729,371 | INTERGENIC | A | G | - | - |
| - | 13,729,656 | INTERGENIC | G | A | - | - |
| - | 13,730,645 | INTERGENIC | G | A | - | - |
| - | 13,732,852 | INTERGENIC | C | T | - | - |
| - | 13,733,051 | INTERGENIC | G | A | - | - |
| - | 13,733,333 | INTERGENIC | G | A | - | - |
| - | 13,734,064 | INTERGENIC | A | G | - | - |
| - | 13,734,113 | INTERGENIC | A | G | - | - |
| - | 13,734,228 | INTERGENIC | T | C | - | - |
| - | 13,734,325 | INTERGENIC | T | C | - | - |
| - | 13,734,544 | INTERGENIC | A | G | - | - |
| - | 13,738,412 | INTERGENIC | A | T | - | - |
| - | 13,739,552 | INTERGENIC | T | C | - | - |
| - | 13,740,560 | INTERGENIC | T | C | - | - |
| - | 13,740,701 | INTERGENIC | G | A | - | - |
| - | 13,740,864 | INTERGENIC | G | A | - | - |
| - | 13,741,537 | INTERGENIC | G | A | - | - |
| - | 13,742,395 | INTERGENIC | T | C | - | - |
| - | 13,743,098 | INTERGENIC | T | A | - | - |
| - | 13,743,358 | INTERGENIC | T | C | - | - |
| - | 13,744,455 | INTERGENIC | C | T | - | - |
| - | 13,744,464 | INTERGENIC | C | T | - | - |
| - | 13,744,657 | INTERGENIC | A | C | - | - |
| - | 13,744,706 | INTERGENIC | G | A | - | - |
| - | 13,745,032 | INTERGENIC | A | G | - | - |
| - | 13,745,034 | INTERGENIC | C | G | - | - |
| - | 13,745,151 | INTERGENIC | T | C | - | - |
| - | 13,745,152 | INTERGENIC | C | A | - | - |
| - | 13,775,378 | INTERGENIC | T | G | - | - |
| - | 13,775,380 | INTERGENIC | A | C | - | - |
| - | 13,775,459 | INTERGENIC | A | C | - | - |
| - | 13,775,462 | INTERGENIC | T | A | - | - |
| - | 13,775,542 | INTERGENIC | A | T | - | - |
| - | 13,775,610 | INTERGENIC | T | G | - | - |
| - | 13,776,295 | INTERGENIC | T | G | - | - |
| - | 13,776,459 | INTERGENIC | A | G | - | - |
| - | 13,776,554 | INTERGENIC | A | G | - | - |
| - | 13,777,515 | INTERGENIC | T | C | - | - |
| - | 13,777,937 | INTERGENIC | G | A | - | - |
| - | 13,778,214 | INTERGENIC | T | C | - | - |
| - | 13,778,380 | INTERGENIC | C | T | - | - |
| - | 13,778,589 | INTERGENIC | G | A | - | - |
| - | 13,779,344 | INTERGENIC | T | C | - | - |
| - | 13,779,345 | INTERGENIC | G | A | - | - |
| - | 13,779,377 | INTERGENIC | G | A | - | - |
| - | 13,779,395 | INTERGENIC | C | G | - | - |
| - | 13,779,428 | INTERGENIC | T | A | - | - |
| - | 13,779,467 | INTERGENIC | C | G | - | - |
| - | 13,779,639 | INTERGENIC | C | A | - | - |
| - | 13,779,662 | INTERGENIC | A | G | - | - |
| - | 13,779,846 | INTERGENIC | C | T | - | - |
| - | 13,779,891 | INTERGENIC | A | G | - | - |
| - | 13,779,905 | INTERGENIC | A | G | - | - |
| - | 13,780,221 | INTERGENIC | G | C | - | - |
| - | 13,780,266 | INTERGENIC | A | T | - | - |
| - | 13,780,308 | INTERGENIC | A | T | - | - |
| - | 13,780,644 | INTERGENIC | T | C | - | - |
| - | 13,780,810 | INTERGENIC | T | C | - | - |
| - | 13,780,982 | INTERGENIC | C | T | - | - |
| - | 13,781,217 | INTERGENIC | T | A | - | - |
| - | 13,781,221 | INTERGENIC | T | A | - | - |
| - | 13,781,291 | INTERGENIC | C | T | - | - |
| - | 13,781,717 | INTERGENIC | A | G | - | - |
| - | 13,782,216 | INTERGENIC | C | G | - | - |
| - | 13,782,292 | INTERGENIC | A | C | - | - |
| - | 13,782,316 | INTERGENIC | G | A | - | - |
| - | 13,782,339 | INTERGENIC | C | G | - | - |
| - | 13,782,359 | INTERGENIC | T | C | - | - |
| - | 13,782,404 | INTERGENIC | T | C | - | - |
| - | 13,782,475 | INTERGENIC | C | T | - | - |
| - | 13,782,864 | INTERGENIC | A | G | - | - |
| - | 13,782,961 | INTERGENIC | G | T | - | - |
| - | 13,783,087 | INTERGENIC | C | T | - | - |
| - | 13,783,106 | INTERGENIC | G | A | - | - |
| - | 13,783,397 | INTERGENIC | C | T | - | - |

|   |            |            |   |   |   |   |
|---|------------|------------|---|---|---|---|
| - | 13,784,869 | INTERGENIC | C | T | - | - |
| - | 13,785,326 | INTERGENIC | A | T | - | - |
| - | 13,787,986 | INTERGENIC | G | C | - | - |
| - | 13,787,992 | INTERGENIC | C | G | - | - |
| - | 13,788,025 | INTERGENIC | A | G | - | - |
| - | 13,788,504 | INTERGENIC | C | T | - | - |
| - | 13,788,729 | INTERGENIC | T | C | - | - |
| - | 13,788,890 | INTERGENIC | A | G | - | - |
| - | 13,789,983 | INTERGENIC | T | A | - | - |
| - | 13,790,624 | INTERGENIC | A | G | - | - |
| - | 13,791,298 | INTERGENIC | C | A | - | - |
| - | 13,792,116 | INTERGENIC | A | G | - | - |
| - | 13,793,362 | INTERGENIC | G | A | - | - |
| - | 13,793,685 | INTERGENIC | G | A | - | - |
| - | 13,794,070 | INTERGENIC | A | G | - | - |
| - | 13,794,287 | INTERGENIC | C | T | - | - |
| - | 13,794,516 | INTERGENIC | C | T | - | - |
| - | 13,794,774 | INTERGENIC | C | T | - | - |
| - | 13,794,783 | INTERGENIC | T | C | - | - |
| - | 13,795,123 | INTERGENIC | C | T | - | - |
| - | 13,795,858 | INTERGENIC | C | T | - | - |
| - | 13,796,403 | INTERGENIC | C | T | - | - |
| - | 13,796,458 | INTERGENIC | G | A | - | - |
| - | 13,796,523 | INTERGENIC | G | A | - | - |
| - | 13,796,799 | INTERGENIC | G | A | - | - |
| - | 13,796,917 | INTERGENIC | T | G | - | - |
| - | 13,797,295 | INTERGENIC | T | A | - | - |
| - | 13,797,603 | INTERGENIC | T | A | - | - |
| - | 13,797,605 | INTERGENIC | G | C | - | - |
| - | 13,797,682 | INTERGENIC | T | G | - | - |
| - | 13,797,727 | INTERGENIC | T | C | - | - |
| - | 13,797,911 | INTERGENIC | A | G | - | - |
| - | 13,798,052 | INTERGENIC | T | C | - | - |
| - | 13,798,097 | INTERGENIC | A | G | - | - |
| - | 13,798,199 | INTERGENIC | A | G | - | - |
| - | 13,798,279 | INTERGENIC | A | G | - | - |
| - | 13,798,321 | INTERGENIC | A | G | - | - |
| - | 13,798,340 | INTERGENIC | T | C | - | - |
| - | 13,798,559 | INTERGENIC | C | A | - | - |
| - | 13,798,889 | INTERGENIC | C | A | - | - |
| - | 13,800,007 | INTERGENIC | T | A | - | - |
| - | 13,800,023 | INTERGENIC | G | A | - | - |
| - | 13,800,292 | INTERGENIC | G | A | - | - |
| - | 13,801,849 | INTERGENIC | G | A | - | - |
| - | 13,801,870 | INTERGENIC | G | A | - | - |
| - | 13,802,856 | INTERGENIC | A | T | - | - |
| - | 13,803,263 | INTERGENIC | G | A | - | - |
| - | 13,803,910 | INTERGENIC | T | A | - | - |
| - | 13,804,502 | INTERGENIC | A | G | - | - |
| - | 13,807,052 | INTERGENIC | G | A | - | - |
| - | 13,807,331 | INTERGENIC | C | T | - | - |
| - | 13,807,706 | INTERGENIC | A | G | - | - |
| - | 13,808,707 | INTERGENIC | A | C | - | - |
| - | 13,808,876 | INTERGENIC | A | G | - | - |
| - | 13,808,897 | INTERGENIC | G | A | - | - |
| - | 13,809,151 | INTERGENIC | T | A | - | - |
| - | 13,809,152 | INTERGENIC | C | T | - | - |
| - | 13,809,229 | INTERGENIC | G | T | - | - |
| - | 13,809,423 | INTERGENIC | T | G | - | - |
| - | 13,809,454 | INTERGENIC | G | A | - | - |
| - | 13,809,510 | INTERGENIC | G | T | - | - |
| - | 13,809,591 | INTERGENIC | G | A | - | - |
| - | 13,809,691 | INTERGENIC | A | G | - | - |
| - | 13,809,752 | INTERGENIC | T | C | - | - |
| - | 13,809,821 | INTERGENIC | T | C | - | - |
| - | 13,809,830 | INTERGENIC | G | A | - | - |
| - | 13,809,989 | INTERGENIC | C | G | - | - |
| - | 13,809,993 | INTERGENIC | C | G | - | - |
| - | 13,811,150 | INTERGENIC | T | C | - | - |
| - | 13,811,316 | INTERGENIC | C | T | - | - |
| - | 13,811,791 | INTERGENIC | A | G | - | - |
| - | 13,812,238 | INTERGENIC | C | T | - | - |
| - | 13,813,723 | INTERGENIC | G | T | - | - |
| - | 13,813,725 | INTERGENIC | T | A | - | - |
| - | 13,813,781 | INTERGENIC | C | T | - | - |
| - | 13,814,189 | INTERGENIC | G | A | - | - |
| - | 13,814,472 | INTERGENIC | G | A | - | - |
| - | 13,814,563 | INTERGENIC | C | T | - | - |
| - | 13,814,769 | INTERGENIC | G | C | - | - |
| - | 13,814,848 | INTERGENIC | C | T | - | - |

|   |            |            |   |   |   |   |
|---|------------|------------|---|---|---|---|
| - | 13,814,945 | INTERGENIC | T | C | - | - |
| - | 13,815,374 | INTERGENIC | T | A | - | - |
| - | 13,815,715 | INTERGENIC | G | A | - | - |
| - | 13,815,780 | INTERGENIC | A | G | - | - |
| - | 13,815,800 | INTERGENIC | A | C | - | - |
| - | 13,815,888 | INTERGENIC | A | G | - | - |
| - | 13,816,258 | INTERGENIC | C | A | - | - |
| - | 13,816,438 | INTERGENIC | G | A | - | - |
| - | 13,816,555 | INTERGENIC | C | A | - | - |
| - | 13,816,673 | INTERGENIC | T | C | - | - |
| - | 13,816,876 | INTERGENIC | A | G | - | - |
| - | 13,816,887 | INTERGENIC | C | T | - | - |
| - | 13,818,062 | INTERGENIC | T | C | - | - |
| - | 13,818,182 | INTERGENIC | G | A | - | - |
| - | 13,818,345 | INTERGENIC | A | T | - | - |
| - | 13,818,615 | INTERGENIC | C | A | - | - |
| - | 13,818,686 | INTERGENIC | A | G | - | - |
| - | 13,819,058 | INTERGENIC | T | C | - | - |
| - | 13,819,402 | INTERGENIC | C | T | - | - |
| - | 13,819,617 | INTERGENIC | G | A | - | - |
| - | 13,820,660 | INTERGENIC | C | T | - | - |
| - | 13,821,019 | INTERGENIC | A | G | - | - |
| - | 13,821,057 | INTERGENIC | G | A | - | - |
| - | 13,821,423 | INTERGENIC | T | C | - | - |
| - | 13,821,937 | INTERGENIC | A | G | - | - |
| - | 13,822,172 | INTERGENIC | A | C | - | - |
| - | 13,822,270 | INTERGENIC | G | T | - | - |
| - | 13,822,376 | INTERGENIC | A | G | - | - |
| - | 13,822,426 | INTERGENIC | T | A | - | - |
| - | 13,822,427 | INTERGENIC | A | T | - | - |
| - | 13,822,478 | INTERGENIC | C | G | - | - |
| - | 13,822,505 | INTERGENIC | T | C | - | - |
| - | 13,822,509 | INTERGENIC | A | G | - | - |
| - | 13,822,899 | INTERGENIC | T | C | - | - |
| - | 13,822,914 | INTERGENIC | C | T | - | - |
| - | 13,823,024 | INTERGENIC | A | T | - | - |
| - | 13,823,216 | INTERGENIC | C | A | - | - |
| - | 13,823,779 | INTERGENIC | C | A | - | - |
| - | 13,823,795 | INTERGENIC | C | T | - | - |
| - | 13,824,465 | INTERGENIC | T | C | - | - |
| - | 13,824,636 | INTERGENIC | C | A | - | - |
| - | 13,824,647 | INTERGENIC | T | C | - | - |
| - | 13,824,769 | INTERGENIC | C | T | - | - |
| - | 13,824,774 | INTERGENIC | A | T | - | - |
| - | 13,824,821 | INTERGENIC | A | T | - | - |
| - | 13,824,989 | INTERGENIC | A | G | - | - |
| - | 13,824,995 | INTERGENIC | G | A | - | - |
| - | 13,825,013 | INTERGENIC | A | G | - | - |
| - | 13,825,182 | INTERGENIC | C | T | - | - |
| - | 13,825,251 | INTERGENIC | C | T | - | - |
| - | 13,825,283 | INTERGENIC | C | A | - | - |
| - | 13,825,551 | INTERGENIC | C | T | - | - |
| - | 13,825,710 | INTERGENIC | C | T | - | - |
| - | 13,825,744 | INTERGENIC | C | A | - | - |
| - | 13,826,024 | INTERGENIC | G | A | - | - |
| - | 13,826,333 | INTERGENIC | C | A | - | - |
| - | 13,826,357 | INTERGENIC | T | C | - | - |
| - | 13,826,360 | INTERGENIC | A | G | - | - |
| - | 13,826,570 | INTERGENIC | T | C | - | - |
| - | 13,827,867 | INTERGENIC | T | C | - | - |
| - | 13,828,405 | INTERGENIC | T | C | - | - |
| - | 13,828,926 | INTERGENIC | T | G | - | - |
| - | 13,829,343 | INTERGENIC | G | A | - | - |
| - | 13,830,113 | INTERGENIC | C | A | - | - |
| - | 13,830,154 | INTERGENIC | T | A | - | - |
| - | 13,830,908 | INTERGENIC | G | A | - | - |
| - | 13,831,148 | INTERGENIC | A | G | - | - |
| - | 13,831,345 | INTERGENIC | G | A | - | - |
| - | 13,831,403 | INTERGENIC | G | A | - | - |
| - | 13,832,358 | INTERGENIC | A | G | - | - |
| - | 13,832,530 | INTERGENIC | G | T | - | - |
| - | 13,832,786 | INTERGENIC | G | A | - | - |
| - | 13,834,059 | INTERGENIC | C | A | - | - |
| - | 13,834,125 | INTERGENIC | T | C | - | - |
| - | 13,834,209 | INTERGENIC | G | A | - | - |
| - | 13,835,077 | INTERGENIC | G | A | - | - |
| - | 13,835,394 | INTERGENIC | G | A | - | - |
| - | 13,835,603 | INTERGENIC | G | A | - | - |
| - | 13,835,607 | INTERGENIC | T | G | - | - |
| - | 13,835,771 | INTERGENIC | G | A | - | - |

|   |            |            |   |   |   |   |
|---|------------|------------|---|---|---|---|
| - | 13,836,340 | INTERGENIC | T | C | - | - |
| - | 13,836,856 | INTERGENIC | C | T | - | - |
| - | 13,837,919 | INTERGENIC | A | G | - | - |
| - | 13,838,316 | INTERGENIC | A | G | - | - |
| - | 13,839,928 | INTERGENIC | A | T | - | - |
| - | 13,840,911 | INTERGENIC | C | T | - | - |
| - | 13,841,493 | INTERGENIC | A | G | - | - |
| - | 13,844,785 | INTERGENIC | T | C | - | - |
| - | 13,845,279 | INTERGENIC | A | G | - | - |
| - | 13,845,570 | INTERGENIC | G | T | - | - |
| - | 13,845,571 | INTERGENIC | A | C | - | - |
| - | 13,845,620 | INTERGENIC | A | C | - | - |
| - | 13,846,198 | INTERGENIC | C | T | - | - |
| - | 13,847,490 | INTERGENIC | G | A | - | - |
| - | 13,848,141 | INTERGENIC | A | G | - | - |
| - | 13,848,399 | INTERGENIC | A | G | - | - |
| - | 13,848,502 | INTERGENIC | A | G | - | - |
| - | 13,848,630 | INTERGENIC | A | G | - | - |
| - | 13,848,964 | INTERGENIC | A | T | - | - |
| - | 13,848,969 | INTERGENIC | C | T | - | - |
| - | 13,849,140 | INTERGENIC | C | T | - | - |
| - | 13,852,397 | INTERGENIC | G | C | - | - |
| - | 13,853,083 | INTERGENIC | C | T | - | - |
| - | 13,853,673 | INTERGENIC | G | C | - | - |
| - | 13,853,759 | INTERGENIC | G | A | - | - |
| - | 13,854,024 | INTERGENIC | T | C | - | - |
| - | 13,855,712 | INTERGENIC | G | T | - | - |
| - | 13,855,823 | INTERGENIC | T | C | - | - |
| - | 13,858,010 | INTERGENIC | C | T | - | - |
| - | 13,858,882 | INTERGENIC | G | A | - | - |
| - | 13,858,966 | INTERGENIC | G | A | - | - |
| - | 13,858,967 | INTERGENIC | C | G | - | - |
| - | 13,859,518 | INTERGENIC | A | T | - | - |
| - | 13,859,737 | INTERGENIC | T | C | - | - |
| - | 13,860,298 | INTERGENIC | G | T | - | - |
| - | 13,860,686 | INTERGENIC | G | C | - | - |
| - | 13,860,986 | INTERGENIC | C | G | - | - |
| - | 13,860,988 | INTERGENIC | G | C | - | - |
| - | 13,861,264 | INTERGENIC | A | G | - | - |
| - | 13,861,374 | INTERGENIC | C | T | - | - |
| - | 13,861,378 | INTERGENIC | T | C | - | - |
| - | 13,861,689 | INTERGENIC | T | C | - | - |
| - | 13,862,424 | INTERGENIC | T | C | - | - |
| - | 13,862,664 | INTERGENIC | T | C | - | - |
| - | 13,862,786 | INTERGENIC | G | C | - | - |
| - | 13,862,891 | INTERGENIC | G | A | - | - |
| - | 13,863,176 | INTERGENIC | C | T | - | - |
| - | 13,863,487 | INTERGENIC | C | A | - | - |
| - | 13,863,688 | INTERGENIC | T | A | - | - |
| - | 13,864,263 | INTERGENIC | G | A | - | - |
| - | 13,864,383 | INTERGENIC | C | T | - | - |
| - | 13,864,562 | INTERGENIC | A | G | - | - |
| - | 13,864,671 | INTERGENIC | C | T | - | - |
| - | 13,865,592 | INTERGENIC | G | A | - | - |
| - | 13,865,643 | INTERGENIC | A | G | - | - |
| - | 13,865,951 | INTERGENIC | C | T | - | - |
| - | 13,865,957 | INTERGENIC | C | T | - | - |
| - | 13,866,106 | INTERGENIC | T | C | - | - |
| - | 13,866,283 | INTERGENIC | G | C | - | - |
| - | 13,866,380 | INTERGENIC | A | T | - | - |
| - | 13,866,676 | INTERGENIC | G | A | - | - |
| - | 13,866,769 | INTERGENIC | T | C | - | - |
| - | 13,866,826 | INTERGENIC | G | A | - | - |
| - | 13,866,869 | INTERGENIC | G | A | - | - |
| - | 13,866,873 | INTERGENIC | G | A | - | - |
| - | 13,867,036 | INTERGENIC | C | A | - | - |
| - | 13,867,956 | INTERGENIC | C | T | - | - |
| - | 13,869,628 | INTERGENIC | A | G | - | - |
| - | 13,869,883 | INTERGENIC | T | A | - | - |
| - | 13,870,209 | INTERGENIC | G | A | - | - |
| - | 13,871,179 | INTERGENIC | A | G | - | - |
| - | 13,872,387 | INTERGENIC | T | A | - | - |
| - | 13,872,532 | INTERGENIC | C | T | - | - |
| - | 13,875,529 | INTERGENIC | A | G | - | - |
| - | 13,875,901 | INTERGENIC | A | T | - | - |
| - | 13,875,911 | INTERGENIC | A | G | - | - |
| - | 13,875,944 | INTERGENIC | A | G | - | - |
| - | 13,875,949 | INTERGENIC | T | C | - | - |
| - | 13,876,174 | INTERGENIC | T | A | - | - |
| - | 13,876,197 | INTERGENIC | A | G | - | - |

|   |            |            |   |   |   |   |
|---|------------|------------|---|---|---|---|
| - | 13,876,213 | INTERGENIC | G | A | - | - |
| - | 13,876,334 | INTERGENIC | T | A | - | - |
| - | 13,876,410 | INTERGENIC | A | G | - | - |
| - | 13,876,468 | INTERGENIC | G | A | - | - |
| - | 13,876,476 | INTERGENIC | C | T | - | - |
| - | 13,876,506 | INTERGENIC | G | A | - | - |
| - | 13,876,510 | INTERGENIC | T | G | - | - |
| - | 13,876,564 | INTERGENIC | C | T | - | - |
| - | 13,876,592 | INTERGENIC | A | G | - | - |
| - | 13,876,647 | INTERGENIC | C | T | - | - |
| - | 13,876,693 | INTERGENIC | A | G | - | - |
| - | 13,876,750 | INTERGENIC | T | C | - | - |
| - | 13,876,826 | INTERGENIC | A | G | - | - |
| - | 13,877,177 | INTERGENIC | C | T | - | - |
| - | 13,878,268 | INTERGENIC | T | C | - | - |
| - | 13,878,436 | INTERGENIC | C | T | - | - |
| - | 13,878,457 | INTERGENIC | A | G | - | - |
| - | 13,878,543 | INTERGENIC | T | C | - | - |
| - | 13,879,009 | INTERGENIC | C | T | - | - |
| - | 13,880,424 | INTERGENIC | A | G | - | - |
| - | 13,883,700 | INTERGENIC | G | A | - | - |
| - | 13,883,851 | INTERGENIC | G | A | - | - |
| - | 13,886,306 | INTERGENIC | G | A | - | - |
| - | 13,886,433 | INTERGENIC | C | T | - | - |
| - | 13,886,722 | INTERGENIC | C | T | - | - |
| - | 13,886,776 | INTERGENIC | A | G | - | - |
| - | 13,889,641 | INTERGENIC | A | G | - | - |
| - | 13,889,824 | INTERGENIC | G | A | - | - |
| - | 13,889,863 | INTERGENIC | C | T | - | - |
| - | 13,894,246 | INTERGENIC | A | G | - | - |
| - | 13,895,057 | INTERGENIC | G | A | - | - |
| - | 13,895,081 | INTERGENIC | C | A | - | - |
| - | 13,895,347 | INTERGENIC | T | A | - | - |
| - | 13,895,973 | INTERGENIC | A | C | - | - |
| - | 13,896,525 | INTERGENIC | G | A | - | - |
| - | 13,897,271 | INTERGENIC | C | A | - | - |
| - | 13,897,380 | INTERGENIC | A | C | - | - |
| - | 13,897,795 | INTERGENIC | T | G | - | - |
| - | 13,898,068 | INTERGENIC | A | G | - | - |
| - | 13,898,211 | INTERGENIC | G | A | - | - |
| - | 13,898,669 | INTERGENIC | G | A | - | - |
| - | 13,898,680 | INTERGENIC | A | G | - | - |
| - | 13,898,737 | INTERGENIC | G | A | - | - |
| - | 13,898,748 | INTERGENIC | C | A | - | - |
| - | 13,898,796 | INTERGENIC | C | T | - | - |
| - | 13,898,834 | INTERGENIC | C | T | - | - |
| - | 13,900,317 | INTERGENIC | C | T | - | - |
| - | 13,900,997 | INTERGENIC | G | A | - | - |
| - | 13,901,036 | INTERGENIC | C | T | - | - |
| - | 13,902,249 | INTERGENIC | G | C | - | - |
| - | 13,902,978 | INTERGENIC | G | A | - | - |
| - | 13,903,133 | INTERGENIC | A | G | - | - |
| - | 13,903,441 | INTERGENIC | T | C | - | - |
| - | 13,903,540 | INTERGENIC | T | C | - | - |
| - | 13,903,661 | INTERGENIC | C | G | - | - |
| - | 13,903,790 | INTERGENIC | A | G | - | - |
| - | 13,905,036 | INTERGENIC | G | A | - | - |
| - | 13,905,124 | INTERGENIC | C | A | - | - |
| - | 13,905,145 | INTERGENIC | A | G | - | - |
| - | 13,915,701 | INTERGENIC | C | T | - | - |
| - | 13,918,372 | INTERGENIC | A | C | - | - |
| - | 13,918,378 | INTERGENIC | A | G | - | - |
| - | 13,918,411 | INTERGENIC | A | C | - | - |
| - | 13,918,424 | INTERGENIC | A | C | - | - |
| - | 13,918,495 | INTERGENIC | T | G | - | - |
| - | 13,918,711 | INTERGENIC | C | G | - | - |
| - | 13,919,384 | INTERGENIC | C | T | - | - |
| - | 13,919,386 | INTERGENIC | A | T | - | - |
| - | 13,919,423 | INTERGENIC | T | C | - | - |
| - | 13,926,494 | INTERGENIC | T | C | - | - |
| - | 13,926,900 | INTERGENIC | C | A | - | - |
| - | 13,928,343 | INTERGENIC | G | T | - | - |
| - | 13,928,433 | INTERGENIC | T | C | - | - |
| - | 13,928,487 | INTERGENIC | T | C | - | - |
| - | 13,929,079 | INTERGENIC | A | G | - | - |
| - | 13,930,526 | INTERGENIC | G | A | - | - |
| - | 13,930,555 | INTERGENIC | T | G | - | - |
| - | 13,930,622 | INTERGENIC | A | G | - | - |
| - | 13,930,691 | INTERGENIC | T | C | - | - |
| - | 13,930,740 | INTERGENIC | G | A | - | - |

|   |            |            |   |   |   |   |
|---|------------|------------|---|---|---|---|
| - | 13,930,793 | INTERGENIC | G | A | - | - |
| - | 13,931,273 | INTERGENIC | T | C | - | - |
| - | 13,931,734 | INTERGENIC | T | G | - | - |
| - | 13,932,414 | INTERGENIC | A | G | - | - |
| - | 13,932,438 | INTERGENIC | A | G | - | - |
| - | 13,932,985 | INTERGENIC | C | T | - | - |
| - | 13,933,130 | INTERGENIC | G | C | - | - |
| - | 13,935,746 | INTERGENIC | A | G | - | - |
| - | 13,935,957 | INTERGENIC | G | A | - | - |
| - | 13,935,985 | INTERGENIC | T | C | - | - |
| - | 13,936,173 | INTERGENIC | C | T | - | - |
| - | 13,936,850 | INTERGENIC | A | C | - | - |
| - | 13,937,677 | INTERGENIC | C | T | - | - |
| - | 13,938,262 | INTERGENIC | A | G | - | - |
| - | 13,938,712 | INTERGENIC | A | C | - | - |
| - | 13,939,019 | INTERGENIC | A | G | - | - |
| - | 13,940,395 | INTERGENIC | G | A | - | - |
| - | 13,941,903 | INTERGENIC | C | T | - | - |
| - | 13,942,936 | INTERGENIC | C | G | - | - |
| - | 13,943,191 | INTERGENIC | A | G | - | - |
| - | 13,946,279 | INTERGENIC | A | G | - | - |
| - | 13,946,973 | INTERGENIC | A | G | - | - |
| - | 13,960,327 | INTERGENIC | T | C | - | - |
| - | 13,960,457 | INTERGENIC | G | C | - | - |
| - | 13,963,451 | INTERGENIC | C | T | - | - |
| - | 13,963,924 | INTERGENIC | G | T | - | - |
| - | 13,963,925 | INTERGENIC | T | G | - | - |
| - | 13,963,962 | INTERGENIC | C | G | - | - |
| - | 13,964,170 | INTERGENIC | G | A | - | - |
| - | 13,964,977 | INTERGENIC | T | G | - | - |
| - | 13,965,862 | INTERGENIC | G | A | - | - |
| - | 13,965,863 | INTERGENIC | C | A | - | - |
| - | 13,965,967 | INTERGENIC | A | G | - | - |
| - | 13,966,504 | INTERGENIC | G | T | - | - |
| - | 13,966,739 | INTERGENIC | G | T | - | - |
| - | 13,966,836 | INTERGENIC | C | T | - | - |
| - | 13,967,051 | INTERGENIC | T | C | - | - |
| - | 13,967,303 | INTERGENIC | G | A | - | - |
| - | 13,967,349 | INTERGENIC | G | T | - | - |
| - | 13,967,772 | INTERGENIC | C | T | - | - |
| - | 13,967,849 | INTERGENIC | G | A | - | - |
| - | 13,967,933 | INTERGENIC | C | T | - | - |
| - | 13,967,934 | INTERGENIC | A | G | - | - |
| - | 13,968,325 | INTERGENIC | G | A | - | - |
| - | 13,968,331 | INTERGENIC | A | G | - | - |
| - | 13,968,401 | INTERGENIC | G | A | - | - |
| - | 13,968,425 | INTERGENIC | T | A | - | - |
| - | 13,968,770 | INTERGENIC | A | G | - | - |
| - | 13,968,840 | INTERGENIC | T | C | - | - |
| - | 13,968,858 | INTERGENIC | G | A | - | - |
| - | 13,969,155 | INTERGENIC | C | T | - | - |
| - | 13,969,471 | INTERGENIC | C | A | - | - |
| - | 13,969,490 | INTERGENIC | A | G | - | - |
| - | 13,969,491 | INTERGENIC | C | T | - | - |
| - | 13,969,578 | INTERGENIC | T | C | - | - |
| - | 13,969,666 | INTERGENIC | C | T | - | - |
| - | 13,969,713 | INTERGENIC | G | A | - | - |
| - | 13,969,737 | INTERGENIC | G | C | - | - |
| - | 13,970,049 | INTERGENIC | C | T | - | - |
| - | 13,970,054 | INTERGENIC | G | A | - | - |
| - | 13,970,172 | INTERGENIC | T | C | - | - |
| - | 13,970,314 | INTERGENIC | G | A | - | - |
| - | 13,970,433 | INTERGENIC | T | C | - | - |
| - | 13,970,434 | INTERGENIC | G | A | - | - |
| - | 13,970,452 | INTERGENIC | G | T | - | - |
| - | 13,970,470 | INTERGENIC | C | T | - | - |
| - | 13,970,636 | INTERGENIC | C | T | - | - |
| - | 13,970,806 | INTERGENIC | C | T | - | - |
| - | 13,970,969 | INTERGENIC | G | C | - | - |
| - | 13,971,046 | INTERGENIC | G | C | - | - |
| - | 13,971,171 | INTERGENIC | A | T | - | - |
| - | 13,971,276 | INTERGENIC | G | A | - | - |
| - | 13,971,396 | INTERGENIC | C | T | - | - |
| - | 13,971,407 | INTERGENIC | T | C | - | - |
| - | 13,971,467 | INTERGENIC | G | A | - | - |
| - | 13,971,663 | INTERGENIC | T | C | - | - |
| - | 13,971,738 | INTERGENIC | C | T | - | - |
| - | 13,971,825 | INTERGENIC | A | G | - | - |
| - | 13,971,904 | INTERGENIC | A | G | - | - |
| - | 13,972,083 | INTERGENIC | T | G | - | - |

|   |            |            |   |   |   |   |
|---|------------|------------|---|---|---|---|
| - | 13,972,113 | INTERGENIC | G | C | - | - |
| - | 13,972,119 | INTERGENIC | T | C | - | - |
| - | 13,972,143 | INTERGENIC | T | A | - | - |
| - | 13,972,219 | INTERGENIC | C | T | - | - |
| - | 13,972,226 | INTERGENIC | T | C | - | - |
| - | 13,972,256 | INTERGENIC | G | C | - | - |
| - | 13,972,270 | INTERGENIC | A | G | - | - |
| - | 13,972,501 | INTERGENIC | G | A | - | - |
| - | 13,972,545 | INTERGENIC | A | C | - | - |
| - | 13,972,686 | INTERGENIC | G | A | - | - |
| - | 13,972,692 | INTERGENIC | A | T | - | - |
| - | 13,972,791 | INTERGENIC | C | T | - | - |
| - | 13,972,833 | INTERGENIC | G | A | - | - |
| - | 13,972,836 | INTERGENIC | T | G | - | - |
| - | 13,972,883 | INTERGENIC | A | G | - | - |
| - | 13,972,903 | INTERGENIC | A | G | - | - |
| - | 13,972,912 | INTERGENIC | G | A | - | - |
| - | 13,972,967 | INTERGENIC | A | G | - | - |
| - | 13,972,983 | INTERGENIC | A | T | - | - |
| - | 13,973,012 | INTERGENIC | C | T | - | - |
| - | 13,973,073 | INTERGENIC | G | A | - | - |
| - | 13,973,145 | INTERGENIC | G | A | - | - |
| - | 13,973,154 | INTERGENIC | A | G | - | - |
| - | 13,973,203 | INTERGENIC | T | C | - | - |
| - | 13,973,204 | INTERGENIC | G | A | - | - |
| - | 13,973,422 | INTERGENIC | C | T | - | - |
| - | 13,973,440 | INTERGENIC | T | C | - | - |
| - | 13,973,465 | INTERGENIC | A | G | - | - |
| - | 13,973,550 | INTERGENIC | A | G | - | - |
| - | 13,973,654 | INTERGENIC | C | A | - | - |
| - | 13,973,660 | INTERGENIC | G | C | - | - |
| - | 13,973,945 | INTERGENIC | G | A | - | - |
| - | 13,974,037 | INTERGENIC | G | A | - | - |
| - | 13,974,062 | INTERGENIC | G | A | - | - |
| - | 13,974,109 | INTERGENIC | A | G | - | - |
| - | 13,974,359 | INTERGENIC | A | C | - | - |
| - | 13,974,542 | INTERGENIC | C | T | - | - |
| - | 13,974,556 | INTERGENIC | C | T | - | - |
| - | 13,974,585 | INTERGENIC | C | T | - | - |
| - | 13,974,626 | INTERGENIC | G | C | - | - |
| - | 13,974,643 | INTERGENIC | T | C | - | - |
| - | 13,974,696 | INTERGENIC | C | T | - | - |
| - | 13,974,744 | INTERGENIC | C | T | - | - |
| - | 13,974,787 | INTERGENIC | C | T | - | - |
| - | 13,974,793 | INTERGENIC | C | G | - | - |
| - | 13,974,831 | INTERGENIC | T | C | - | - |
| - | 13,974,847 | INTERGENIC | A | G | - | - |
| - | 13,974,862 | INTERGENIC | G | A | - | - |
| - | 13,974,904 | INTERGENIC | C | T | - | - |
| - | 13,974,908 | INTERGENIC | T | A | - | - |
| - | 13,974,974 | INTERGENIC | C | T | - | - |
| - | 13,975,464 | INTERGENIC | G | A | - | - |
| - | 13,975,499 | INTERGENIC | C | T | - | - |
| - | 13,975,504 | INTERGENIC | A | G | - | - |
| - | 13,975,517 | INTERGENIC | G | A | - | - |
| - | 13,975,537 | INTERGENIC | A | G | - | - |
| - | 13,975,538 | INTERGENIC | A | C | - | - |
| - | 13,975,763 | INTERGENIC | A | C | - | - |
| - | 13,975,764 | INTERGENIC | G | A | - | - |
| - | 13,975,833 | INTERGENIC | C | G | - | - |
| - | 13,975,867 | INTERGENIC | A | T | - | - |
| - | 13,976,322 | INTERGENIC | C | T | - | - |
| - | 13,976,400 | INTERGENIC | G | A | - | - |
| - | 13,976,601 | INTERGENIC | G | A | - | - |
| - | 13,976,602 | INTERGENIC | G | C | - | - |
| - | 13,976,652 | INTERGENIC | T | C | - | - |
| - | 13,976,762 | INTERGENIC | C | T | - | - |
| - | 13,976,804 | INTERGENIC | A | G | - | - |
| - | 13,976,929 | INTERGENIC | T | C | - | - |
| - | 13,977,049 | INTERGENIC | T | C | - | - |
| - | 13,977,357 | INTERGENIC | T | A | - | - |
| - | 13,977,428 | INTERGENIC | A | G | - | - |
| - | 13,978,017 | INTERGENIC | G | A | - | - |
| - | 13,978,059 | INTERGENIC | G | A | - | - |
| - | 13,978,189 | INTERGENIC | G | A | - | - |
| - | 13,978,467 | INTERGENIC | G | A | - | - |
| - | 13,978,475 | INTERGENIC | C | G | - | - |
| - | 13,978,487 | INTERGENIC | G | A | - | - |
| - | 13,978,489 | INTERGENIC | G | A | - | - |
| - | 13,978,550 | INTERGENIC | A | G | - | - |

|            |                    |            |                       |   |   |   |   |
|------------|--------------------|------------|-----------------------|---|---|---|---|
| -          | -                  | 13,979,009 | INTERGENIC            | A | G | - | - |
| -          | -                  | 13,979,097 | INTERGENIC            | C | G | - | - |
| -          | -                  | 13,979,175 | INTERGENIC            | C | T | - | - |
| -          | -                  | 13,979,176 | INTERGENIC            | T | G | - | - |
| -          | -                  | 13,979,542 | INTERGENIC            | A | G | - | - |
| -          | -                  | 13,979,823 | INTERGENIC            | A | G | - | - |
| -          | -                  | 13,980,228 | INTERGENIC            | C | T | - | - |
| -          | -                  | 13,980,302 | INTERGENIC            | A | C | - | - |
| -          | -                  | 13,980,781 | INTERGENIC            | G | C | - | - |
| -          | -                  | 13,981,121 | INTERGENIC            | T | C | - | - |
| -          | -                  | 13,981,174 | INTERGENIC            | G | A | - | - |
| -          | -                  | 13,981,253 | INTERGENIC            | G | A | - | - |
| -          | -                  | 13,981,369 | INTERGENIC            | C | T | - | - |
| -          | -                  | 13,981,427 | INTERGENIC            | G | A | - | - |
| -          | -                  | 13,981,847 | INTERGENIC            | T | C | - | - |
| -          | -                  | 13,981,906 | INTERGENIC            | G | A | - | - |
| -          | -                  | 13,982,087 | INTERGENIC            | G | A | - | - |
| -          | -                  | 13,982,233 | INTERGENIC            | C | T | - | - |
| -          | -                  | 13,982,537 | INTERGENIC            | G | A | - | - |
| -          | -                  | 13,982,581 | INTERGENIC            | A | T | - | - |
| -          | -                  | 13,983,593 | INTERGENIC            | G | A | - | - |
| -          | -                  | 13,983,773 | INTERGENIC            | A | G | - | - |
| -          | -                  | 13,984,539 | INTERGENIC            | C | T | - | - |
| -          | -                  | 13,984,644 | INTERGENIC            | C | T | - | - |
| -          | -                  | 13,984,703 | INTERGENIC            | T | C | - | - |
| -          | -                  | 13,984,734 | INTERGENIC            | A | G | - | - |
| -          | -                  | 13,985,489 | INTERGENIC            | G | A | - | - |
| -          | -                  | 13,985,741 | INTERGENIC            | T | C | - | - |
| -          | -                  | 13,985,838 | INTERGENIC            | C | A | - | - |
| -          | -                  | 13,986,315 | INTERGENIC            | T | C | - | - |
| -          | -                  | 13,986,853 | INTERGENIC            | T | C | - | - |
| -          | -                  | 13,987,512 | INTERGENIC            | T | C | - | - |
| F1LUI3_RAT | ENSRNOT00000029004 | 13,987,975 | DOWNSTREAM            | A | G | - | - |
| F1LUI3_RAT | ENSRNOT00000029004 | 13,988,059 | DOWNSTREAM            | C | T | - | - |
| F1LUI3_RAT | ENSRNOT00000029004 | 13,988,308 | DOWNSTREAM            | T | C | - | - |
| F1LUI3_RAT | ENSRNOT00000029004 | 13,988,573 | DOWNSTREAM            | T | C | - | - |
| F1LUI3_RAT | ENSRNOT00000029004 | 13,988,595 | DOWNSTREAM            | T | C | - | - |
| F1LUI3_RAT | ENSRNOT00000029004 | 13,990,355 | DOWNSTREAM            | G | A | - | - |
| F1LUI3_RAT | ENSRNOT00000029004 | 13,990,440 | DOWNSTREAM            | T | A | - | - |
| F1LUI3_RAT | ENSRNOT00000029004 | 13,990,610 | DOWNSTREAM            | C | A | - | - |
| F1LUI3_RAT | ENSRNOT00000029004 | 13,991,006 | DOWNSTREAM            | T | C | - | - |
| F1LUI3_RAT | ENSRNOT00000029004 | 13,991,394 | DOWNSTREAM            | G | T | - | - |
| F1LUI3_RAT | ENSRNOT00000029004 | 13,991,396 | DOWNSTREAM            | G | T | - | - |
| F1LUI3_RAT | ENSRNOT00000029004 | 13,991,425 | DOWNSTREAM            | A | G | - | - |
| F1LUI3_RAT | ENSRNOT00000029004 | 13,991,463 | DOWNSTREAM            | C | G | - | - |
| F1LUI3_RAT | ENSRNOT00000029004 | 13,991,707 | DOWNSTREAM            | C | A | - | - |
| F1LUI3_RAT | ENSRNOT00000029004 | 13,991,826 | DOWNSTREAM            | G | A | - | - |
| F1LUI3_RAT | ENSRNOT00000029004 | 13,991,958 | DOWNSTREAM            | T | C | - | - |
| F1LUI3_RAT | ENSRNOT00000029004 | 13,991,991 | DOWNSTREAM            | C | T | - | - |
| F1LUI3_RAT | ENSRNOT00000029004 | 13,992,033 | DOWNSTREAM            | C | G | - | - |
| F1LUI3_RAT | ENSRNOT00000029004 | 13,992,150 | DOWNSTREAM            | T | C | - | - |
| F1LUI3_RAT | ENSRNOT00000029004 | 13,992,198 | DOWNSTREAM            | T | C | - | - |
| F1LUI3_RAT | ENSRNOT00000029004 | 13,992,206 | DOWNSTREAM            | A | G | - | - |
| F1LUI3_RAT | ENSRNOT00000029004 | 13,992,250 | DOWNSTREAM            | C | A | - | - |
| F1LUI3_RAT | ENSRNOT00000029004 | 13,992,347 | DOWNSTREAM            | A | G | - | - |
| F1LUI3_RAT | ENSRNOT00000029004 | 13,992,364 | DOWNSTREAM            | G | A | - | - |
| F1LUI3_RAT | ENSRNOT00000029004 | 13,993,542 | INTRONIC              | T | C | - | - |
| F1LUI3_RAT | ENSRNOT00000029004 | 13,993,570 | INTRONIC              | C | G | - | - |
| F1LUI3_RAT | ENSRNOT00000029004 | 13,993,651 | INTRONIC              | A | G | - | - |
| F1LUI3_RAT | ENSRNOT00000029004 | 13,993,668 | INTRONIC              | G | A | - | - |
| F1LUI3_RAT | ENSRNOT00000029004 | 13,993,812 | NON_SYNONYMOUS_CODING | G | A | T | I |
| F1LUI3_RAT | ENSRNOT00000029004 | 13,993,860 | NON_SYNONYMOUS_CODING | G | A | T | I |
| F1LUI3_RAT | ENSRNOT00000029004 | 13,995,070 | NON_SYNONYMOUS_CODING | C | G | E | Q |
| F1LUI3_RAT | ENSRNOT00000029004 | 13,995,087 | NON_SYNONYMOUS_CODING | T | G | H | P |
| F1LUI3_RAT | ENSRNOT00000029004 | 13,995,109 | NON_SYNONYMOUS_CODING | T | A | T | S |
| F1LUI3_RAT | ENSRNOT00000029004 | 13,995,118 | NON_SYNONYMOUS_CODING | C | G | E | Q |
| F1LUI3_RAT | ENSRNOT00000029004 | 13,995,427 | NON_SYNONYMOUS_CODING | C | T | A | T |
| F1LUI3_RAT | ENSRNOT00000029004 | 13,995,694 | UPSTREAM              | C | G | - | - |
| F1LUI3_RAT | ENSRNOT00000029004 | 13,996,014 | UPSTREAM              | A | G | - | - |
| F1LUI3_RAT | ENSRNOT00000029004 | 13,996,365 | UPSTREAM              | A | T | - | - |
| F1LUI3_RAT | ENSRNOT00000029004 | 13,998,125 | UPSTREAM              | G | T | - | - |
| F1LUI3_RAT | ENSRNOT00000029004 | 13,998,433 | UPSTREAM              | C | T | - | - |
| F1LUI3_RAT | ENSRNOT00000029004 | 13,998,575 | UPSTREAM              | C | T | - | - |
| F1LUI3_RAT | ENSRNOT00000029004 | 13,998,628 | UPSTREAM              | C | A | - | - |
| F1LUI3_RAT | ENSRNOT00000029004 | 13,998,715 | UPSTREAM              | A | C | - | - |
| F1LUI3_RAT | ENSRNOT00000029004 | 13,998,757 | UPSTREAM              | G | C | - | - |
| F1LUI3_RAT | ENSRNOT00000029004 | 13,998,810 | UPSTREAM              | C | T | - | - |
| F1LUI3_RAT | ENSRNOT00000029004 | 13,999,317 | UPSTREAM              | A | G | - | - |
| F1LUI3_RAT | ENSRNOT00000029004 | 13,999,478 | UPSTREAM              | T | C | - | - |
| F1LUI3_RAT | ENSRNOT00000029004 | 13,999,814 | UPSTREAM              | T | C | - | - |



|            |                    |            |            |   |   |   |   |
|------------|--------------------|------------|------------|---|---|---|---|
| F1LUI3_RAT | ENSRNOT00000029004 | 13,999,909 | UPSTREAM   | C | A | - | - |
| F1LUI3_RAT | ENSRNOT00000029004 | 13,999,969 | UPSTREAM   | G | A | - | - |
| F1LUI3_RAT | ENSRNOT00000029004 | 14,000,302 | UPSTREAM   | T | G | - | - |
| -          | -                  | 14,000,579 | INTERGENIC | G | A | - | - |
| -          | -                  | 14,000,849 | INTERGENIC | T | G | - | - |
| -          | -                  | 14,000,980 | INTERGENIC | C | G | - | - |
| -          | -                  | 14,001,051 | INTERGENIC | G | A | - | - |
| -          | -                  | 14,001,196 | INTERGENIC | A | G | - | - |
| -          | -                  | 14,001,358 | INTERGENIC | C | A | - | - |
| -          | -                  | 14,001,364 | INTERGENIC | C | A | - | - |
| -          | -                  | 14,001,611 | INTERGENIC | C | G | - | - |
| -          | -                  | 14,001,650 | INTERGENIC | T | C | - | - |
| -          | -                  | 14,001,764 | INTERGENIC | G | A | - | - |
| -          | -                  | 14,001,766 | INTERGENIC | C | G | - | - |
| -          | -                  | 14,001,844 | INTERGENIC | C | G | - | - |
| -          | -                  | 14,001,845 | INTERGENIC | T | C | - | - |
| -          | -                  | 14,001,898 | INTERGENIC | A | G | - | - |
| -          | -                  | 14,002,072 | INTERGENIC | G | C | - | - |
| -          | -                  | 14,002,251 | INTERGENIC | C | T | - | - |
| -          | -                  | 14,002,517 | INTERGENIC | T | C | - | - |
| -          | -                  | 14,002,878 | INTERGENIC | C | T | - | - |
| -          | -                  | 14,003,248 | INTERGENIC | G | A | - | - |
| -          | -                  | 14,003,288 | INTERGENIC | A | G | - | - |
| -          | -                  | 14,003,448 | INTERGENIC | C | T | - | - |
| -          | -                  | 14,003,456 | INTERGENIC | C | T | - | - |
| -          | -                  | 14,003,503 | INTERGENIC | C | T | - | - |
| -          | -                  | 14,003,584 | INTERGENIC | G | A | - | - |
| -          | -                  | 14,003,648 | INTERGENIC | A | T | - | - |
| -          | -                  | 14,003,724 | INTERGENIC | T | C | - | - |
| -          | -                  | 14,003,775 | INTERGENIC | G | C | - | - |
| -          | -                  | 14,003,820 | INTERGENIC | A | G | - | - |
| -          | -                  | 14,003,993 | INTERGENIC | A | G | - | - |
| -          | -                  | 14,003,997 | INTERGENIC | A | G | - | - |
| -          | -                  | 14,004,199 | INTERGENIC | T | G | - | - |
| -          | -                  | 14,004,646 | INTERGENIC | G | A | - | - |
| -          | -                  | 14,004,766 | INTERGENIC | C | A | - | - |
| -          | -                  | 14,004,958 | INTERGENIC | A | G | - | - |
| -          | -                  | 14,005,137 | INTERGENIC | C | G | - | - |
| -          | -                  | 14,005,155 | INTERGENIC | T | C | - | - |
| -          | -                  | 14,005,255 | INTERGENIC | G | A | - | - |
| -          | -                  | 14,005,301 | INTERGENIC | C | A | - | - |
| -          | -                  | 14,005,617 | INTERGENIC | T | C | - | - |
| -          | -                  | 14,005,821 | INTERGENIC | C | A | - | - |
| -          | -                  | 14,006,071 | INTERGENIC | T | A | - | - |
| -          | -                  | 14,006,153 | INTERGENIC | G | A | - | - |
| -          | -                  | 14,006,207 | INTERGENIC | G | A | - | - |
| -          | -                  | 14,006,316 | INTERGENIC | C | T | - | - |
| -          | -                  | 14,006,545 | INTERGENIC | T | C | - | - |
| -          | -                  | 14,006,601 | INTERGENIC | G | A | - | - |
| -          | -                  | 14,006,604 | INTERGENIC | G | A | - | - |
| -          | -                  | 14,007,696 | INTERGENIC | T | C | - | - |
| -          | -                  | 14,016,627 | INTERGENIC | T | C | - | - |
| -          | -                  | 14,016,719 | INTERGENIC | T | G | - | - |
| -          | -                  | 14,016,755 | INTERGENIC | T | A | - | - |
| -          | -                  | 14,016,757 | INTERGENIC | G | A | - | - |
| -          | -                  | 14,016,922 | INTERGENIC | G | T | - | - |
| -          | -                  | 14,016,923 | INTERGENIC | A | G | - | - |
| -          | -                  | 14,017,044 | INTERGENIC | A | T | - | - |
| -          | -                  | 14,017,097 | INTERGENIC | G | A | - | - |
| -          | -                  | 14,017,183 | INTERGENIC | C | G | - | - |
| -          | -                  | 14,017,238 | INTERGENIC | A | G | - | - |
| -          | -                  | 14,017,320 | INTERGENIC | T | C | - | - |
| -          | -                  | 14,017,848 | INTERGENIC | C | T | - | - |
| -          | -                  | 14,017,890 | INTERGENIC | T | C | - | - |
| -          | -                  | 14,017,934 | INTERGENIC | C | T | - | - |
| -          | -                  | 14,018,031 | INTERGENIC | T | C | - | - |
| -          | -                  | 14,018,076 | INTERGENIC | A | G | - | - |
| -          | -                  | 14,018,166 | INTERGENIC | A | C | - | - |
| -          | -                  | 14,018,810 | INTERGENIC | A | G | - | - |
| -          | -                  | 14,019,089 | INTERGENIC | A | T | - | - |
| -          | -                  | 14,019,206 | INTERGENIC | T | C | - | - |
| -          | -                  | 14,019,401 | INTERGENIC | G | C | - | - |
| -          | -                  | 14,019,546 | INTERGENIC | C | T | - | - |
| -          | -                  | 14,020,000 | INTERGENIC | G | A | - | - |
| -          | -                  | 14,020,037 | INTERGENIC | C | T | - | - |
| -          | -                  | 14,020,195 | INTERGENIC | G | A | - | - |
| -          | -                  | 14,020,396 | INTERGENIC | G | A | - | - |
| -          | -                  | 14,021,637 | INTERGENIC | T | C | - | - |
| -          | -                  | 14,022,224 | INTERGENIC | A | T | - | - |
| -          | -                  | 14,022,753 | INTERGENIC | A | C | - | - |

|   |            |            |   |   |   |   |
|---|------------|------------|---|---|---|---|
| - | 14,023,337 | INTERGENIC | T | C | - | - |
| - | 14,023,408 | INTERGENIC | T | C | - | - |
| - | 14,024,421 | INTERGENIC | A | G | - | - |
| - | 14,024,434 | INTERGENIC | G | A | - | - |
| - | 14,024,678 | INTERGENIC | A | G | - | - |
| - | 14,024,738 | INTERGENIC | T | C | - | - |
| - | 14,024,745 | INTERGENIC | G | A | - | - |
| - | 14,024,929 | INTERGENIC | A | G | - | - |
| - | 14,025,432 | INTERGENIC | C | T | - | - |
| - | 14,025,875 | INTERGENIC | G | A | - | - |
| - | 14,026,171 | INTERGENIC | T | A | - | - |
| - | 14,026,204 | INTERGENIC | G | A | - | - |
| - | 14,026,220 | INTERGENIC | T | C | - | - |
| - | 14,026,261 | INTERGENIC | C | T | - | - |
| - | 14,026,476 | INTERGENIC | C | T | - | - |
| - | 14,026,700 | INTERGENIC | G | A | - | - |
| - | 14,027,164 | INTERGENIC | A | T | - | - |
| - | 14,027,416 | INTERGENIC | A | T | - | - |
| - | 14,027,487 | INTERGENIC | C | T | - | - |
| - | 14,028,100 | INTERGENIC | A | G | - | - |
| - | 14,028,293 | INTERGENIC | C | T | - | - |
| - | 14,028,402 | INTERGENIC | A | G | - | - |
| - | 14,029,261 | INTERGENIC | C | T | - | - |
| - | 14,030,569 | INTERGENIC | T | A | - | - |
| - | 14,032,040 | INTERGENIC | A | G | - | - |
| - | 14,033,503 | INTERGENIC | C | T | - | - |
| - | 14,033,684 | INTERGENIC | T | C | - | - |
| - | 14,033,889 | INTERGENIC | G | A | - | - |
| - | 14,034,965 | INTERGENIC | G | A | - | - |
| - | 14,035,230 | INTERGENIC | C | A | - | - |
| - | 14,035,564 | INTERGENIC | C | T | - | - |
| - | 14,035,904 | INTERGENIC | T | C | - | - |
| - | 14,035,989 | INTERGENIC | C | T | - | - |
| - | 14,037,651 | INTERGENIC | T | C | - | - |
| - | 14,037,654 | INTERGENIC | A | G | - | - |
| - | 14,048,824 | INTERGENIC | A | G | - | - |
| - | 14,049,614 | INTERGENIC | T | C | - | - |
| - | 14,050,437 | INTERGENIC | C | T | - | - |
| - | 14,050,559 | INTERGENIC | T | G | - | - |
| - | 14,050,863 | INTERGENIC | T | C | - | - |
| - | 14,051,426 | INTERGENIC | G | A | - | - |
| - | 14,052,952 | INTERGENIC | C | T | - | - |
| - | 14,053,011 | INTERGENIC | T | C | - | - |
| - | 14,053,149 | INTERGENIC | C | T | - | - |
| - | 14,053,546 | INTERGENIC | C | T | - | - |
| - | 14,054,984 | INTERGENIC | G | T | - | - |
| - | 14,055,024 | INTERGENIC | A | G | - | - |
| - | 14,055,658 | INTERGENIC | C | T | - | - |
| - | 14,055,848 | INTERGENIC | C | T | - | - |
| - | 14,056,610 | INTERGENIC | C | T | - | - |
| - | 14,056,730 | INTERGENIC | A | G | - | - |
| - | 14,058,193 | INTERGENIC | T | C | - | - |
| - | 14,058,924 | INTERGENIC | T | G | - | - |
| - | 14,058,961 | INTERGENIC | G | A | - | - |
| - | 14,059,040 | INTERGENIC | G | A | - | - |
| - | 14,059,081 | INTERGENIC | T | G | - | - |
| - | 14,059,118 | INTERGENIC | G | A | - | - |
| - | 14,060,027 | INTERGENIC | G | A | - | - |
| - | 14,060,264 | INTERGENIC | A | G | - | - |
| - | 14,060,324 | INTERGENIC | A | G | - | - |
| - | 14,060,573 | INTERGENIC | C | G | - | - |
| - | 14,060,688 | INTERGENIC | A | G | - | - |
| - | 14,061,863 | INTERGENIC | C | A | - | - |
| - | 14,062,943 | INTERGENIC | T | G | - | - |
| - | 14,063,044 | INTERGENIC | C | T | - | - |
| - | 14,063,944 | INTERGENIC | A | G | - | - |
| - | 14,065,204 | INTERGENIC | C | G | - | - |
| - | 14,065,208 | INTERGENIC | G | C | - | - |
| - | 14,065,626 | INTERGENIC | C | T | - | - |
| - | 14,066,012 | INTERGENIC | C | G | - | - |
| - | 14,066,597 | INTERGENIC | G | A | - | - |
| - | 14,069,291 | INTERGENIC | T | G | - | - |
| - | 14,070,521 | INTERGENIC | A | G | - | - |
| - | 14,072,312 | INTERGENIC | C | T | - | - |
| - | 14,072,772 | INTERGENIC | G | T | - | - |
| - | 14,073,483 | INTERGENIC | T | C | - | - |
| - | 14,073,604 | INTERGENIC | G | A | - | - |
| - | 14,078,407 | INTERGENIC | T | C | - | - |
| - | 14,078,567 | INTERGENIC | A | G | - | - |
| - | 14,079,369 | INTERGENIC | T | A | - | - |

|   |            |            |   |   |   |   |
|---|------------|------------|---|---|---|---|
| - | 14,079,399 | INTERGENIC | G | C | - | - |
| - | 14,079,973 | INTERGENIC | C | T | - | - |
| - | 14,080,733 | INTERGENIC | A | G | - | - |
| - | 14,080,775 | INTERGENIC | A | G | - | - |
| - | 14,081,015 | INTERGENIC | C | G | - | - |
| - | 14,081,269 | INTERGENIC | C | A | - | - |
| - | 14,081,323 | INTERGENIC | C | T | - | - |
| - | 14,083,215 | INTERGENIC | T | C | - | - |
| - | 14,083,278 | INTERGENIC | A | G | - | - |
| - | 14,083,353 | INTERGENIC | A | C | - | - |
| - | 14,083,822 | INTERGENIC | G | A | - | - |
| - | 14,084,535 | INTERGENIC | A | T | - | - |
| - | 14,084,592 | INTERGENIC | T | C | - | - |
| - | 14,086,263 | INTERGENIC | A | T | - | - |
| - | 14,087,058 | INTERGENIC | T | C | - | - |
| - | 14,087,291 | INTERGENIC | G | A | - | - |
| - | 14,087,548 | INTERGENIC | A | G | - | - |
| - | 14,089,187 | INTERGENIC | G | A | - | - |
| - | 14,089,379 | INTERGENIC | A | T | - | - |
| - | 14,089,380 | INTERGENIC | A | C | - | - |
| - | 14,089,554 | INTERGENIC | T | C | - | - |
| - | 14,089,956 | INTERGENIC | G | A | - | - |
| - | 14,090,771 | INTERGENIC | T | C | - | - |
| - | 14,091,522 | INTERGENIC | G | A | - | - |
| - | 14,092,346 | INTERGENIC | T | A | - | - |
| - | 14,092,477 | INTERGENIC | A | T | - | - |
| - | 14,092,540 | INTERGENIC | A | G | - | - |
| - | 14,092,587 | INTERGENIC | A | C | - | - |
| - | 14,092,631 | INTERGENIC | T | C | - | - |
| - | 14,092,632 | INTERGENIC | G | A | - | - |
| - | 14,093,101 | INTERGENIC | C | T | - | - |
| - | 14,093,175 | INTERGENIC | T | C | - | - |
| - | 14,093,252 | INTERGENIC | C | T | - | - |
| - | 14,093,931 | INTERGENIC | A | C | - | - |
| - | 14,096,131 | INTERGENIC | A | G | - | - |
| - | 14,096,270 | INTERGENIC | C | G | - | - |
| - | 14,096,419 | INTERGENIC | G | A | - | - |
| - | 14,096,474 | INTERGENIC | G | A | - | - |
| - | 14,096,506 | INTERGENIC | G | A | - | - |
| - | 14,096,621 | INTERGENIC | T | G | - | - |
| - | 14,096,904 | INTERGENIC | G | C | - | - |
| - | 14,096,962 | INTERGENIC | T | C | - | - |
| - | 14,097,052 | INTERGENIC | G | A | - | - |
| - | 14,097,191 | INTERGENIC | C | T | - | - |
| - | 14,097,194 | INTERGENIC | A | T | - | - |
| - | 14,097,290 | INTERGENIC | A | G | - | - |
| - | 14,097,303 | INTERGENIC | A | T | - | - |
| - | 14,097,635 | INTERGENIC | C | T | - | - |
| - | 14,097,768 | INTERGENIC | G | A | - | - |
| - | 14,097,773 | INTERGENIC | T | C | - | - |
| - | 14,097,820 | INTERGENIC | T | G | - | - |
| - | 14,098,134 | INTERGENIC | C | T | - | - |
| - | 14,098,167 | INTERGENIC | G | A | - | - |
| - | 14,098,224 | INTERGENIC | T | C | - | - |
| - | 14,098,226 | INTERGENIC | T | C | - | - |
| - | 14,098,349 | INTERGENIC | A | G | - | - |
| - | 14,098,564 | INTERGENIC | C | T | - | - |
| - | 14,099,531 | INTERGENIC | C | T | - | - |
| - | 14,099,556 | INTERGENIC | T | C | - | - |
| - | 14,099,608 | INTERGENIC | T | C | - | - |
| - | 14,099,653 | INTERGENIC | A | C | - | - |
| - | 14,099,654 | INTERGENIC | C | T | - | - |
| - | 14,100,603 | INTERGENIC | A | C | - | - |
| - | 14,101,346 | INTERGENIC | A | G | - | - |
| - | 14,101,507 | INTERGENIC | G | A | - | - |
| - | 14,101,914 | INTERGENIC | A | T | - | - |
| - | 14,102,006 | INTERGENIC | C | A | - | - |
| - | 14,102,300 | INTERGENIC | A | G | - | - |
| - | 14,103,053 | INTERGENIC | G | A | - | - |
| - | 14,103,319 | INTERGENIC | C | T | - | - |
| - | 14,103,494 | INTERGENIC | A | G | - | - |
| - | 14,103,495 | INTERGENIC | C | T | - | - |
| - | 14,103,531 | INTERGENIC | A | G | - | - |
| - | 14,103,640 | INTERGENIC | G | A | - | - |
| - | 14,103,912 | INTERGENIC | G | C | - | - |
| - | 14,103,946 | INTERGENIC | T | C | - | - |
| - | 14,104,149 | INTERGENIC | A | C | - | - |
| - | 14,104,968 | INTERGENIC | G | A | - | - |
| - | 14,105,391 | INTERGENIC | A | G | - | - |
| - | 14,105,484 | INTERGENIC | A | G | - | - |

|   |            |            |   |   |   |   |
|---|------------|------------|---|---|---|---|
| - | 14,105,501 | INTERGENIC | A | G | - | - |
| - | 14,105,593 | INTERGENIC | T | C | - | - |
| - | 14,105,643 | INTERGENIC | T | C | - | - |
| - | 14,105,658 | INTERGENIC | C | T | - | - |
| - | 14,105,693 | INTERGENIC | T | C | - | - |
| - | 14,105,757 | INTERGENIC | T | C | - | - |
| - | 14,105,837 | INTERGENIC | C | T | - | - |
| - | 14,105,845 | INTERGENIC | C | A | - | - |
| - | 14,105,946 | INTERGENIC | T | C | - | - |
| - | 14,106,014 | INTERGENIC | A | T | - | - |
| - | 14,106,076 | INTERGENIC | A | G | - | - |
| - | 14,106,108 | INTERGENIC | T | C | - | - |
| - | 14,106,286 | INTERGENIC | G | A | - | - |
| - | 14,106,363 | INTERGENIC | C | G | - | - |
| - | 14,106,450 | INTERGENIC | G | C | - | - |
| - | 14,106,506 | INTERGENIC | G | A | - | - |
| - | 14,106,517 | INTERGENIC | G | A | - | - |
| - | 14,106,858 | INTERGENIC | A | G | - | - |
| - | 14,106,930 | INTERGENIC | T | C | - | - |
| - | 14,106,947 | INTERGENIC | T | C | - | - |
| - | 14,106,961 | INTERGENIC | T | C | - | - |
| - | 14,107,013 | INTERGENIC | G | A | - | - |
| - | 14,107,081 | INTERGENIC | A | G | - | - |
| - | 14,107,453 | INTERGENIC | C | A | - | - |
| - | 14,107,595 | INTERGENIC | G | A | - | - |
| - | 14,108,026 | INTERGENIC | A | G | - | - |
| - | 14,108,900 | INTERGENIC | C | G | - | - |
| - | 14,109,539 | INTERGENIC | C | T | - | - |
| - | 14,110,118 | INTERGENIC | A | G | - | - |
| - | 14,110,504 | INTERGENIC | G | A | - | - |
| - | 14,110,569 | INTERGENIC | T | G | - | - |
| - | 14,110,838 | INTERGENIC | G | T | - | - |
| - | 14,110,899 | INTERGENIC | T | G | - | - |
| - | 14,111,052 | INTERGENIC | A | T | - | - |
| - | 14,111,100 | INTERGENIC | T | C | - | - |
| - | 14,111,134 | INTERGENIC | G | A | - | - |
| - | 14,111,178 | INTERGENIC | A | G | - | - |
| - | 14,111,597 | INTERGENIC | G | A | - | - |
| - | 14,111,634 | INTERGENIC | C | T | - | - |
| - | 14,111,643 | INTERGENIC | C | A | - | - |
| - | 14,112,221 | INTERGENIC | T | C | - | - |
| - | 14,113,111 | INTERGENIC | C | G | - | - |
| - | 14,113,113 | INTERGENIC | C | G | - | - |
| - | 14,113,351 | INTERGENIC | C | T | - | - |
| - | 14,114,019 | INTERGENIC | G | A | - | - |
| - | 14,114,406 | INTERGENIC | T | C | - | - |
| - | 14,115,338 | INTERGENIC | G | A | - | - |
| - | 14,115,490 | INTERGENIC | G | A | - | - |
| - | 14,116,093 | INTERGENIC | G | C | - | - |
| - | 14,116,114 | INTERGENIC | A | T | - | - |
| - | 14,116,951 | INTERGENIC | A | C | - | - |
| - | 14,117,424 | INTERGENIC | A | G | - | - |
| - | 14,117,667 | INTERGENIC | A | T | - | - |
| - | 14,119,047 | INTERGENIC | T | C | - | - |
| - | 14,119,347 | INTERGENIC | C | T | - | - |
| - | 14,119,514 | INTERGENIC | A | G | - | - |
| - | 14,119,638 | INTERGENIC | C | T | - | - |
| - | 14,119,983 | INTERGENIC | C | T | - | - |
| - | 14,120,261 | INTERGENIC | C | T | - | - |
| - | 14,120,435 | INTERGENIC | T | C | - | - |
| - | 14,120,860 | INTERGENIC | T | C | - | - |
| - | 14,121,271 | INTERGENIC | G | A | - | - |
| - | 14,121,316 | INTERGENIC | T | C | - | - |
| - | 14,121,326 | INTERGENIC | T | A | - | - |
| - | 14,121,352 | INTERGENIC | A | G | - | - |
| - | 14,121,441 | INTERGENIC | A | C | - | - |
| - | 14,121,489 | INTERGENIC | G | T | - | - |
| - | 14,121,592 | INTERGENIC | G | A | - | - |
| - | 14,121,810 | INTERGENIC | G | A | - | - |
| - | 14,126,572 | INTERGENIC | G | A | - | - |
| - | 14,126,615 | INTERGENIC | G | T | - | - |
| - | 14,126,617 | INTERGENIC | G | T | - | - |
| - | 14,126,700 | INTERGENIC | G | C | - | - |
| - | 14,126,720 | INTERGENIC | G | A | - | - |
| - | 14,126,725 | INTERGENIC | G | T | - | - |
| - | 14,126,744 | INTERGENIC | G | T | - | - |
| - | 14,126,765 | INTERGENIC | G | A | - | - |
| - | 14,126,808 | INTERGENIC | G | A | - | - |
| - | 14,127,072 | INTERGENIC | T | C | - | - |
| - | 14,127,372 | INTERGENIC | C | T | - | - |

|   |            |            |   |   |   |   |
|---|------------|------------|---|---|---|---|
| - | 14,127,373 | INTERGENIC | G | A | - | - |
| - | 14,127,415 | INTERGENIC | C | A | - | - |
| - | 14,128,007 | INTERGENIC | G | C | - | - |
| - | 14,128,202 | INTERGENIC | C | A | - | - |
| - | 14,128,340 | INTERGENIC | T | C | - | - |
| - | 14,128,480 | INTERGENIC | C | T | - | - |
| - | 14,128,482 | INTERGENIC | G | C | - | - |
| - | 14,128,619 | INTERGENIC | C | T | - | - |
| - | 14,128,820 | INTERGENIC | C | A | - | - |
| - | 14,129,038 | INTERGENIC | G | A | - | - |
| - | 14,129,402 | INTERGENIC | C | T | - | - |
| - | 14,129,502 | INTERGENIC | T | G | - | - |
| - | 14,129,524 | INTERGENIC | C | T | - | - |
| - | 14,129,541 | INTERGENIC | G | A | - | - |
| - | 14,129,744 | INTERGENIC | G | A | - | - |
| - | 14,129,949 | INTERGENIC | T | C | - | - |
| - | 14,130,263 | INTERGENIC | G | A | - | - |
| - | 14,130,301 | INTERGENIC | A | G | - | - |
| - | 14,131,786 | INTERGENIC | A | G | - | - |
| - | 14,131,898 | INTERGENIC | G | T | - | - |
| - | 14,131,947 | INTERGENIC | G | T | - | - |
| - | 14,131,957 | INTERGENIC | G | A | - | - |
| - | 14,132,067 | INTERGENIC | C | T | - | - |
| - | 14,132,080 | INTERGENIC | C | A | - | - |
| - | 14,132,158 | INTERGENIC | C | G | - | - |
| - | 14,132,184 | INTERGENIC | G | T | - | - |
| - | 14,132,188 | INTERGENIC | A | C | - | - |
| - | 14,132,400 | INTERGENIC | T | C | - | - |
| - | 14,132,828 | INTERGENIC | A | G | - | - |
| - | 14,132,915 | INTERGENIC | A | G | - | - |
| - | 14,133,177 | INTERGENIC | G | A | - | - |
| - | 14,133,255 | INTERGENIC | G | A | - | - |
| - | 14,133,507 | INTERGENIC | T | C | - | - |
| - | 14,133,516 | INTERGENIC | A | G | - | - |
| - | 14,133,892 | INTERGENIC | A | G | - | - |
| - | 14,134,143 | INTERGENIC | G | A | - | - |
| - | 14,134,193 | INTERGENIC | A | G | - | - |
| - | 14,134,367 | INTERGENIC | A | C | - | - |
| - | 14,134,809 | INTERGENIC | G | A | - | - |
| - | 14,136,674 | INTERGENIC | C | G | - | - |
| - | 14,137,099 | INTERGENIC | A | G | - | - |
| - | 14,137,172 | INTERGENIC | A | G | - | - |
| - | 14,137,219 | INTERGENIC | C | T | - | - |
| - | 14,137,405 | INTERGENIC | G | A | - | - |
| - | 14,137,483 | INTERGENIC | T | C | - | - |
| - | 14,137,853 | INTERGENIC | C | A | - | - |
| - | 14,138,549 | INTERGENIC | T | C | - | - |
| - | 14,138,779 | INTERGENIC | T | G | - | - |
| - | 14,139,425 | INTERGENIC | G | A | - | - |
| - | 14,139,628 | INTERGENIC | G | A | - | - |
| - | 14,139,738 | INTERGENIC | C | T | - | - |
| - | 14,139,769 | INTERGENIC | A | G | - | - |
| - | 14,139,854 | INTERGENIC | C | T | - | - |
| - | 14,140,006 | INTERGENIC | A | G | - | - |
| - | 14,140,015 | INTERGENIC | G | T | - | - |
| - | 14,140,096 | INTERGENIC | T | C | - | - |
| - | 14,140,100 | INTERGENIC | C | T | - | - |
| - | 14,140,105 | INTERGENIC | A | C | - | - |
| - | 14,140,119 | INTERGENIC | G | A | - | - |
| - | 14,140,172 | INTERGENIC | T | G | - | - |
| - | 14,140,196 | INTERGENIC | G | A | - | - |
| - | 14,140,278 | INTERGENIC | T | C | - | - |
| - | 14,140,320 | INTERGENIC | A | G | - | - |
| - | 14,140,335 | INTERGENIC | G | A | - | - |
| - | 14,140,808 | INTERGENIC | C | T | - | - |
| - | 14,140,896 | INTERGENIC | A | G | - | - |
| - | 14,141,114 | INTERGENIC | A | G | - | - |
| - | 14,141,303 | INTERGENIC | G | A | - | - |
| - | 14,141,398 | INTERGENIC | T | C | - | - |
| - | 14,141,821 | INTERGENIC | A | G | - | - |
| - | 14,142,152 | INTERGENIC | C | T | - | - |
| - | 14,142,191 | INTERGENIC | G | T | - | - |
| - | 14,142,867 | INTERGENIC | A | G | - | - |
| - | 14,143,019 | INTERGENIC | G | C | - | - |
| - | 14,143,074 | INTERGENIC | A | G | - | - |
| - | 14,143,103 | INTERGENIC | A | G | - | - |
| - | 14,143,130 | INTERGENIC | C | A | - | - |
| - | 14,143,131 | INTERGENIC | C | T | - | - |
| - | 14,143,551 | INTERGENIC | G | A | - | - |
| - | 14,143,594 | INTERGENIC | A | T | - | - |

|   |            |            |   |   |   |   |
|---|------------|------------|---|---|---|---|
| - | 14,143,596 | INTERGENIC | G | T | - | - |
| - | 14,143,612 | INTERGENIC | G | A | - | - |
| - | 14,143,730 | INTERGENIC | A | G | - | - |
| - | 14,143,741 | INTERGENIC | A | G | - | - |
| - | 14,143,753 | INTERGENIC | T | C | - | - |
| - | 14,143,788 | INTERGENIC | C | T | - | - |
| - | 14,143,817 | INTERGENIC | G | C | - | - |
| - | 14,143,863 | INTERGENIC | G | A | - | - |
| - | 14,143,961 | INTERGENIC | A | G | - | - |
| - | 14,144,193 | INTERGENIC | G | A | - | - |
| - | 14,144,197 | INTERGENIC | A | G | - | - |
| - | 14,144,218 | INTERGENIC | G | A | - | - |
| - | 14,144,231 | INTERGENIC | A | G | - | - |
| - | 14,144,274 | INTERGENIC | G | C | - | - |
| - | 14,144,291 | INTERGENIC | T | C | - | - |
| - | 14,144,328 | INTERGENIC | T | C | - | - |
| - | 14,144,576 | INTERGENIC | A | C | - | - |
| - | 14,144,794 | INTERGENIC | A | G | - | - |
| - | 14,144,820 | INTERGENIC | A | G | - | - |
| - | 14,144,992 | INTERGENIC | G | A | - | - |
| - | 14,145,193 | INTERGENIC | G | A | - | - |
| - | 14,145,218 | INTERGENIC | T | C | - | - |
| - | 14,145,353 | INTERGENIC | G | A | - | - |
| - | 14,145,377 | INTERGENIC | C | T | - | - |
| - | 14,145,379 | INTERGENIC | T | A | - | - |
| - | 14,145,926 | INTERGENIC | A | G | - | - |
| - | 14,146,034 | INTERGENIC | C | A | - | - |
| - | 14,146,315 | INTERGENIC | C | T | - | - |
| - | 14,146,424 | INTERGENIC | T | C | - | - |
| - | 14,146,557 | INTERGENIC | A | C | - | - |
| - | 14,147,547 | INTERGENIC | T | C | - | - |
| - | 14,147,691 | INTERGENIC | C | T | - | - |
| - | 14,147,712 | INTERGENIC | A | G | - | - |
| - | 14,147,915 | INTERGENIC | T | G | - | - |
| - | 14,148,397 | INTERGENIC | T | C | - | - |
| - | 14,148,422 | INTERGENIC | A | G | - | - |
| - | 14,148,449 | INTERGENIC | C | T | - | - |
| - | 14,148,464 | INTERGENIC | T | G | - | - |
| - | 14,148,500 | INTERGENIC | A | G | - | - |
| - | 14,148,544 | INTERGENIC | A | T | - | - |
| - | 14,148,558 | INTERGENIC | C | A | - | - |
| - | 14,148,614 | INTERGENIC | G | A | - | - |
| - | 14,148,623 | INTERGENIC | C | A | - | - |
| - | 14,148,742 | INTERGENIC | A | G | - | - |
| - | 14,149,244 | INTERGENIC | C | T | - | - |
| - | 14,149,817 | INTERGENIC | A | G | - | - |
| - | 14,149,846 | INTERGENIC | A | G | - | - |
| - | 14,150,131 | INTERGENIC | T | G | - | - |
| - | 14,150,228 | INTERGENIC | T | G | - | - |
| - | 14,155,648 | INTERGENIC | A | G | - | - |
| - | 14,155,812 | INTERGENIC | G | A | - | - |
| - | 14,157,808 | INTERGENIC | C | G | - | - |
| - | 14,158,058 | INTERGENIC | T | C | - | - |
| - | 14,160,792 | INTERGENIC | T | C | - | - |
| - | 14,160,887 | INTERGENIC | C | A | - | - |
| - | 14,160,905 | INTERGENIC | T | G | - | - |
| - | 14,161,032 | INTERGENIC | A | G | - | - |
| - | 14,161,208 | INTERGENIC | A | G | - | - |
| - | 14,162,513 | INTERGENIC | C | T | - | - |
| - | 14,163,137 | INTERGENIC | G | A | - | - |
| - | 14,163,744 | INTERGENIC | T | A | - | - |
| - | 14,165,825 | INTERGENIC | C | T | - | - |
| - | 14,165,838 | INTERGENIC | A | G | - | - |
| - | 14,166,051 | INTERGENIC | A | G | - | - |
| - | 14,166,204 | INTERGENIC | C | A | - | - |
| - | 14,166,211 | INTERGENIC | C | G | - | - |
| - | 14,166,245 | INTERGENIC | C | A | - | - |
| - | 14,166,432 | INTERGENIC | A | G | - | - |
| - | 14,167,230 | INTERGENIC | A | C | - | - |
| - | 14,167,282 | INTERGENIC | G | A | - | - |
| - | 14,167,413 | INTERGENIC | G | A | - | - |
| - | 14,167,437 | INTERGENIC | G | A | - | - |
| - | 14,167,544 | INTERGENIC | A | C | - | - |
| - | 14,167,545 | INTERGENIC | G | A | - | - |
| - | 14,167,607 | INTERGENIC | A | G | - | - |
| - | 14,167,706 | INTERGENIC | C | T | - | - |
| - | 14,167,746 | INTERGENIC | C | T | - | - |
| - | 14,167,794 | INTERGENIC | A | G | - | - |
| - | 14,168,129 | INTERGENIC | G | T | - | - |
| - | 14,168,334 | INTERGENIC | G | A | - | - |

|            |                    |            |                   |   |   |   |   |
|------------|--------------------|------------|-------------------|---|---|---|---|
| -          |                    | 14,168,409 | INTERGENIC        | A | G | - | - |
| -          |                    | 14,168,415 | INTERGENIC        | A | G | - | - |
| -          |                    | 14,168,763 | INTERGENIC        | G | C | - | - |
| -          |                    | 14,168,764 | INTERGENIC        | G | A | - | - |
| -          |                    | 14,168,771 | INTERGENIC        | T | G | - | - |
| -          |                    | 14,168,814 | INTERGENIC        | A | G | - | - |
| -          |                    | 14,168,825 | INTERGENIC        | C | A | - | - |
| -          |                    | 14,169,049 | INTERGENIC        | G | A | - | - |
| -          |                    | 14,169,177 | INTERGENIC        | T | C | - | - |
| -          |                    | 14,169,229 | INTERGENIC        | T | A | - | - |
| -          |                    | 14,169,304 | INTERGENIC        | G | A | - | - |
| -          |                    | 14,169,381 | INTERGENIC        | A | G | - | - |
| -          |                    | 14,169,387 | INTERGENIC        | G | A | - | - |
| -          |                    | 14,169,407 | INTERGENIC        | A | G | - | - |
| -          |                    | 14,169,635 | INTERGENIC        | A | T | - | - |
| -          |                    | 14,169,699 | INTERGENIC        | T | G | - | - |
| -          |                    | 14,169,712 | INTERGENIC        | G | A | - | - |
| -          |                    | 14,169,724 | INTERGENIC        | C | T | - | - |
| -          |                    | 14,169,754 | INTERGENIC        | C | T | - | - |
| -          |                    | 14,169,812 | INTERGENIC        | A | T | - | - |
| -          |                    | 14,169,891 | INTERGENIC        | G | A | - | - |
| -          |                    | 14,170,168 | INTERGENIC        | C | T | - | - |
| -          |                    | 14,170,169 | INTERGENIC        | A | G | - | - |
| -          |                    | 14,170,201 | INTERGENIC        | G | A | - | - |
| -          |                    | 14,170,392 | INTERGENIC        | C | T | - | - |
| -          |                    | 14,170,512 | INTERGENIC        | G | A | - | - |
| -          |                    | 14,170,770 | INTERGENIC        | C | T | - | - |
| -          |                    | 14,171,081 | INTERGENIC        | G | A | - | - |
| -          |                    | 14,171,370 | INTERGENIC        | T | C | - | - |
| -          |                    | 14,171,406 | INTERGENIC        | T | C | - | - |
| -          |                    | 14,171,426 | INTERGENIC        | A | T | - | - |
| -          |                    | 14,171,427 | INTERGENIC        | A | C | - | - |
| -          |                    | 14,171,648 | INTERGENIC        | C | T | - | - |
| -          |                    | 14,171,717 | INTERGENIC        | G | C | - | - |
| -          |                    | 14,171,751 | INTERGENIC        | C | G | - | - |
| -          |                    | 14,171,789 | INTERGENIC        | A | G | - | - |
| -          |                    | 14,172,022 | INTERGENIC        | C | A | - | - |
| -          |                    | 14,172,174 | INTERGENIC        | G | A | - | - |
| -          |                    | 14,172,327 | INTERGENIC        | T | C | - | - |
| -          |                    | 14,172,398 | INTERGENIC        | T | C | - | - |
| -          |                    | 14,172,756 | INTERGENIC        | C | T | - | - |
| -          |                    | 14,173,224 | INTERGENIC        | T | G | - | - |
| -          |                    | 14,174,120 | INTERGENIC        | A | G | - | - |
| -          |                    | 14,174,363 | INTERGENIC        | T | A | - | - |
| -          |                    | 14,174,395 | INTERGENIC        | G | A | - | - |
| -          |                    | 14,174,444 | INTERGENIC        | C | T | - | - |
| -          |                    | 14,174,773 | INTERGENIC        | T | C | - | - |
| -          |                    | 14,174,989 | INTERGENIC        | A | G | - | - |
| -          |                    | 14,175,948 | INTERGENIC        | T | A | - | - |
| -          |                    | 14,175,949 | INTERGENIC        | C | T | - | - |
| -          |                    | 14,176,043 | INTERGENIC        | T | G | - | - |
| -          |                    | 14,176,145 | INTERGENIC        | T | C | - | - |
| -          |                    | 14,176,598 | INTERGENIC        | A | G | - | - |
| -          |                    | 14,176,690 | INTERGENIC        | A | T | - | - |
| -          |                    | 14,177,235 | INTERGENIC        | C | T | - | - |
| -          |                    | 14,178,125 | INTERGENIC        | G | A | - | - |
| -          |                    | 14,178,162 | INTERGENIC        | G | A | - | - |
| -          |                    | 14,178,415 | INTERGENIC        | A | G | - | - |
| -          |                    | 14,179,767 | INTERGENIC        | A | G | - | - |
| -          |                    | 14,179,856 | INTERGENIC        | C | T | - | - |
| -          |                    | 14,180,051 | INTERGENIC        | T | A | - | - |
| -          |                    | 14,180,152 | INTERGENIC        | A | G | - | - |
| F1M1I1_RAT | ENSRNOT00000051382 | 14,183,454 | UPSTREAM          | A | G | - | - |
| F1M1I1_RAT | ENSRNOT00000051382 | 14,184,747 | UPSTREAM          | T | C | - | - |
| F1M1I1_RAT | ENSRNOT00000051382 | 14,184,892 | UPSTREAM          | G | A | - | - |
| F1M1I1_RAT | ENSRNOT00000051382 | 14,185,912 | UPSTREAM          | G | C | - | - |
| F1M1I1_RAT | ENSRNOT00000051382 | 14,186,445 | UPSTREAM          | G | T | - | - |
| F1M1I1_RAT | ENSRNOT00000051382 | 14,186,447 | UPSTREAM          | T | C | - | - |
| F1M1I1_RAT | ENSRNOT00000051382 | 14,187,481 | SYNONYMOUS_CODING | T | C | - | - |
| F1M1I1_RAT | ENSRNOT00000051382 | 14,187,640 | INTRONIC          | A | G | - | - |
| F1M1I1_RAT | ENSRNOT00000051382 | 14,187,819 | INTRONIC          | T | C | - | - |
| F1M1I1_RAT | ENSRNOT00000051382 | 14,187,907 | INTRONIC          | T | A | - | - |
| F1M1I1_RAT | ENSRNOT00000051382 | 14,188,016 | INTRONIC          | G | T | - | - |
| F1M1I1_RAT | ENSRNOT00000051382 | 14,188,080 | INTRONIC          | A | C | - | - |
| F1M1I1_RAT | ENSRNOT00000051382 | 14,188,141 | INTRONIC          | A | G | - | - |
| F1M1I1_RAT | ENSRNOT00000051382 | 14,188,909 | INTRONIC          | G | A | - | - |
| F1M1I1_RAT | ENSRNOT00000051382 | 14,188,911 | INTRONIC          | C | A | - | - |
| F1M1I1_RAT | ENSRNOT00000051382 | 14,188,938 | INTRONIC          | C | T | - | - |
| F1M1I1_RAT | ENSRNOT00000051382 | 14,189,361 | INTRONIC          | T | C | - | - |
| F1M1I1_RAT | ENSRNOT00000051382 | 14,189,416 | INTRONIC          | C | G | - | - |

|            |                    |            |                       |   |   |   |   |
|------------|--------------------|------------|-----------------------|---|---|---|---|
| F1M1I1_RAT | ENSRNOT00000051382 | 14,189,510 | INTRONIC              | T | C | - | - |
| F1M1I1_RAT | ENSRNOT00000051382 | 14,189,566 | INTRONIC              | A | G | - | - |
| F1M1I1_RAT | ENSRNOT00000051382 | 14,189,572 | INTRONIC              | A | G | - | - |
| F1M1I1_RAT | ENSRNOT00000051382 | 14,189,754 | INTRONIC              | C | T | - | - |
| F1M1I1_RAT | ENSRNOT00000051382 | 14,190,440 | INTRONIC              | A | G | - | - |
| F1M1I1_RAT | ENSRNOT00000051382 | 14,190,537 | INTRONIC              | A | T | - | - |
| F1M1I1_RAT | ENSRNOT00000051382 | 14,190,902 | INTRONIC              | T | G | - | - |
| F1M1I1_RAT | ENSRNOT00000051382 | 14,191,000 | INTRONIC              | C | T | - | - |
| F1M1I1_RAT | ENSRNOT00000051382 | 14,191,254 | INTRONIC              | G | A | - | - |
| F1M1I1_RAT | ENSRNOT00000051382 | 14,191,451 | INTRONIC              | G | A | - | - |
| F1M1I1_RAT | ENSRNOT00000051382 | 14,191,841 | INTRONIC              | C | T | - | - |
| F1M1I1_RAT | ENSRNOT00000051382 | 14,191,978 | INTRONIC              | A | G | - | - |
| F1M1I1_RAT | ENSRNOT00000051382 | 14,191,999 | INTRONIC              | T | G | - | - |
| F1M1I1_RAT | ENSRNOT00000051382 | 14,192,009 | INTRONIC              | C | T | - | - |
| F1M1I1_RAT | ENSRNOT00000051382 | 14,192,128 | INTRONIC              | G | A | - | - |
| F1M1I1_RAT | ENSRNOT00000051382 | 14,192,192 | INTRONIC              | G | C | - | - |
| F1M1I1_RAT | ENSRNOT00000051382 | 14,192,790 | INTRONIC              | G | C | - | - |
| F1M1I1_RAT | ENSRNOT00000051382 | 14,193,132 | INTRONIC              | G | T | - | - |
| F1M1I1_RAT | ENSRNOT00000051382 | 14,193,175 | INTRONIC              | G | A | - | - |
| F1M1I1_RAT | ENSRNOT00000051382 | 14,193,263 | INTRONIC              | A | G | - | - |
| F1M1I1_RAT | ENSRNOT00000051382 | 14,193,933 | INTRONIC              | C | T | - | - |
| F1M1I1_RAT | ENSRNOT00000051382 | 14,193,985 | INTRONIC              | T | G | - | - |
| F1M1I1_RAT | ENSRNOT00000051382 | 14,194,134 | INTRONIC              | T | A | - | - |
| F1M1I1_RAT | ENSRNOT00000051382 | 14,194,209 | INTRONIC              | T | C | - | - |
| F1M1I1_RAT | ENSRNOT00000051382 | 14,194,218 | INTRONIC              | G | C | - | - |
| F1M1I1_RAT | ENSRNOT00000051382 | 14,195,008 | INTRONIC              | C | A | - | - |
| F1M1I1_RAT | ENSRNOT00000051382 | 14,195,054 | INTRONIC              | A | G | - | - |
| F1M1I1_RAT | ENSRNOT00000051382 | 14,195,256 | INTRONIC              | A | G | - | - |
| F1M1I1_RAT | ENSRNOT00000051382 | 14,195,291 | INTRONIC              | A | C | - | - |
| F1M1I1_RAT | ENSRNOT00000051382 | 14,195,590 | INTRONIC              | C | T | - | - |
| F1M1I1_RAT | ENSRNOT00000051382 | 14,195,642 | INTRONIC              | C | A | - | - |
| F1M1I1_RAT | ENSRNOT00000051382 | 14,196,189 | INTRONIC              | T | C | - | - |
| F1M1I1_RAT | ENSRNOT00000051382 | 14,196,332 | INTRONIC              | G | C | - | - |
| F1M1I1_RAT | ENSRNOT00000051382 | 14,196,339 | INTRONIC              | T | C | - | - |
| F1M1I1_RAT | ENSRNOT00000051382 | 14,196,484 | INTRONIC              | T | C | - | - |
| F1M1I1_RAT | ENSRNOT00000051382 | 14,196,700 | INTRONIC              | C | T | - | - |
| F1M1I1_RAT | ENSRNOT00000051382 | 14,197,459 | INTRONIC              | T | C | - | - |
| F1M1I1_RAT | ENSRNOT00000051382 | 14,198,021 | INTRONIC              | A | G | - | - |
| F1M1I1_RAT | ENSRNOT00000051382 | 14,198,074 | INTRONIC              | T | C | - | - |
| F1M1I1_RAT | ENSRNOT00000051382 | 14,198,296 | INTRONIC              | T | C | - | - |
| F1M1I1_RAT | ENSRNOT00000051382 | 14,198,500 | INTRONIC              | T | C | - | - |
| F1M1I1_RAT | ENSRNOT00000051382 | 14,198,588 | INTRONIC              | G | A | - | - |
| F1M1I1_RAT | ENSRNOT00000051382 | 14,198,838 | INTRONIC              | T | A | - | - |
| F1M1I1_RAT | ENSRNOT00000051382 | 14,198,946 | INTRONIC              | C | T | - | - |
| F1M1I1_RAT | ENSRNOT00000051382 | 14,199,003 | INTRONIC              | A | G | - | - |
| F1M1I1_RAT | ENSRNOT00000051382 | 14,199,545 | INTRONIC              | A | G | - | - |
| F1M1I1_RAT | ENSRNOT00000051382 | 14,199,558 | INTRONIC              | C | T | - | - |
| F1M1I1_RAT | ENSRNOT00000051382 | 14,199,728 | INTRONIC              | A | G | - | - |
| F1M1I1_RAT | ENSRNOT00000051382 | 14,200,281 | INTRONIC              | G | A | - | - |
| F1M1I1_RAT | ENSRNOT00000051382 | 14,200,306 | INTRONIC              | A | G | - | - |
| F1M1I1_RAT | ENSRNOT00000051382 | 14,200,320 | INTRONIC              | G | A | - | - |
| F1M1I1_RAT | ENSRNOT00000051382 | 14,200,524 | SYNONYMOUS_CODING     | A | G | - | - |
| F1M1I1_RAT | ENSRNOT00000051382 | 14,200,749 | INTRONIC              | T | G | - | - |
| F1M1I1_RAT | ENSRNOT00000051382 | 14,201,807 | INTRONIC              | A | G | - | - |
| F1M1I1_RAT | ENSRNOT00000051382 | 14,201,808 | INTRONIC              | T | C | - | - |
| F1M1I1_RAT | ENSRNOT00000051382 | 14,202,016 | INTRONIC              | T | C | - | - |
| F1M1I1_RAT | ENSRNOT00000051382 | 14,202,118 | INTRONIC              | G | A | - | - |
| F1M1I1_RAT | ENSRNOT00000051382 | 14,202,122 | INTRONIC              | C | T | - | - |
| F1M1I1_RAT | ENSRNOT00000051382 | 14,202,171 | INTRONIC              | G | A | - | - |
| F1M1I1_RAT | ENSRNOT00000051382 | 14,202,175 | INTRONIC              | C | T | - | - |
| F1M1I1_RAT | ENSRNOT00000051382 | 14,203,345 | INTRONIC              | A | C | - | - |
| F1M1I1_RAT | ENSRNOT00000051382 | 14,203,519 | INTRONIC              | A | C | - | - |
| F1M1I1_RAT | ENSRNOT00000051382 | 14,204,184 | INTRONIC              | A | G | - | - |
| F1M1I1_RAT | ENSRNOT00000051382 | 14,204,448 | INTRONIC              | C | T | - | - |
| F1M1I1_RAT | ENSRNOT00000051382 | 14,204,512 | INTRONIC              | T | C | - | - |
| F1M1I1_RAT | ENSRNOT00000051382 | 14,204,871 | INTRONIC              | A | G | - | - |
| F1M1I1_RAT | ENSRNOT00000051382 | 14,206,068 | INTRONIC              | C | T | - | - |
| F1M1I1_RAT | ENSRNOT00000051382 | 14,206,161 | INTRONIC              | G | A | - | - |
| F1M1I1_RAT | ENSRNOT00000051382 | 14,206,886 | INTRONIC              | C | G | - | - |
| F1M1I1_RAT | ENSRNOT00000051382 | 14,209,803 | INTRONIC              | G | C | - | - |
| F1M1I1_RAT | ENSRNOT00000051382 | 14,209,915 | INTRONIC              | C | T | - | - |
| F1M1I1_RAT | ENSRNOT00000051382 | 14,210,384 | INTRONIC              | A | G | - | - |
| F1M1I1_RAT | ENSRNOT00000051382 | 14,210,559 | INTRONIC              | G | C | - | - |
| F1M1I1_RAT | ENSRNOT00000051382 | 14,211,229 | INTRONIC              | C | T | - | - |
| F1M1I1_RAT | ENSRNOT00000051382 | 14,212,981 | INTRONIC              | T | C | - | - |
| F1M1I1_RAT | ENSRNOT00000051382 | 14,213,489 | INTRONIC              | C | A | - | - |
| F1M1I1_RAT | ENSRNOT00000051382 | 14,213,506 | INTRONIC              | T | C | - | - |
| F1M1I1_RAT | ENSRNOT00000051382 | 14,216,979 | INTRONIC              | G | A | - | - |
| F1M1I1_RAT | ENSRNOT00000051382 | 14,217,245 | INTRONIC              | T | C | - | - |
| F1M1I1_RAT | ENSRNOT00000051382 | 14,218,596 | ESSENTIAL_SPLICE_SITE | G | C | - | - |



|            |                    |            |                       |   |   |   |   |
|------------|--------------------|------------|-----------------------|---|---|---|---|
| F1M1I1_RAT | ENSRNOT00000051382 | 14,218,784 | INTRONIC              | G | A | - | - |
| F1M1I1_RAT | ENSRNOT00000051382 | 14,219,145 | NON_SYNONYMOUS_CODING | C | A | P | T |
| F1M1I1_RAT | ENSRNOT00000051382 | 14,219,232 | INTRONIC              | A | G | - | - |
| F1M1I1_RAT | ENSRNOT00000051382 | 14,219,300 | INTRONIC              | G | A | - | - |
| F1M1I1_RAT | ENSRNOT00000051382 | 14,219,318 | INTRONIC              | G | A | - | - |
| F1M1I1_RAT | ENSRNOT00000051382 | 14,219,531 | INTRONIC              | A | G | - | - |
| F1M1I1_RAT | ENSRNOT00000051382 | 14,219,911 | INTRONIC              | C | G | - | - |
| F1M1I1_RAT | ENSRNOT00000051382 | 14,220,017 | INTRONIC              | T | C | - | - |
| F1M1I1_RAT | ENSRNOT00000051382 | 14,220,075 | INTRONIC              | T | C | - | - |
| F1M1I1_RAT | ENSRNOT00000051382 | 14,220,097 | INTRONIC              | T | C | - | - |
| F1M1I1_RAT | ENSRNOT00000051382 | 14,220,166 | INTRONIC              | A | C | - | - |
| F1M1I1_RAT | ENSRNOT00000051382 | 14,220,170 | INTRONIC              | T | C | - | - |
| F1M1I1_RAT | ENSRNOT00000051382 | 14,220,195 | INTRONIC              | C | A | - | - |
| F1M1I1_RAT | ENSRNOT00000051382 | 14,220,340 | INTRONIC              | G | A | - | - |
| F1M1I1_RAT | ENSRNOT00000051382 | 14,220,343 | INTRONIC              | T | G | - | - |
| F1M1I1_RAT | ENSRNOT00000051382 | 14,220,349 | INTRONIC              | A | G | - | - |
| F1M1I1_RAT | ENSRNOT00000051382 | 14,220,482 | INTRONIC              | G | A | - | - |
| F1M1I1_RAT | ENSRNOT00000051382 | 14,220,551 | INTRONIC              | C | T | - | - |
| F1M1I1_RAT | ENSRNOT00000051382 | 14,220,593 | INTRONIC              | G | A | - | - |
| F1M1I1_RAT | ENSRNOT00000051382 | 14,220,636 | INTRONIC              | A | G | - | - |
| F1M1I1_RAT | ENSRNOT00000051382 | 14,220,655 | INTRONIC              | A | G | - | - |
| F1M1I1_RAT | ENSRNOT00000051382 | 14,221,057 | INTRONIC              | T | C | - | - |
| F1M1I1_RAT | ENSRNOT00000051382 | 14,221,079 | INTRONIC              | C | T | - | - |
| F1M1I1_RAT | ENSRNOT00000051382 | 14,221,156 | INTRONIC              | T | C | - | - |
| F1M1I1_RAT | ENSRNOT00000051382 | 14,221,234 | INTRONIC              | T | C | - | - |
| F1M1I1_RAT | ENSRNOT00000051382 | 14,221,255 | INTRONIC              | G | C | - | - |
| F1M1I1_RAT | ENSRNOT00000051382 | 14,221,461 | INTRONIC              | C | T | - | - |
| F1M1I1_RAT | ENSRNOT00000051382 | 14,221,472 | INTRONIC              | T | C | - | - |
| F1M1I1_RAT | ENSRNOT00000051382 | 14,221,485 | INTRONIC              | G | A | - | - |
| F1M1I1_RAT | ENSRNOT00000051382 | 14,221,529 | INTRONIC              | C | T | - | - |
| F1M1I1_RAT | ENSRNOT00000051382 | 14,221,583 | INTRONIC              | G | A | - | - |
| F1M1I1_RAT | ENSRNOT00000051382 | 14,222,786 | INTRONIC              | C | T | - | - |
| F1M1I1_RAT | ENSRNOT00000051382 | 14,223,120 | INTRONIC              | C | T | - | - |
| F1M1I1_RAT | ENSRNOT00000051382 | 14,223,438 | INTRONIC              | A | C | - | - |
| F1M1I1_RAT | ENSRNOT00000051382 | 14,224,121 | INTRONIC              | G | A | - | - |
| F1M1I1_RAT | ENSRNOT00000051382 | 14,224,486 | INTRONIC              | T | C | - | - |
| F1M1I1_RAT | ENSRNOT00000051382 | 14,224,491 | INTRONIC              | G | A | - | - |
| F1M1I1_RAT | ENSRNOT00000051382 | 14,225,277 | INTRONIC              | T | A | - | - |
| F1M1I1_RAT | ENSRNOT00000051382 | 14,226,536 | INTRONIC              | A | G | - | - |
| F1M1I1_RAT | ENSRNOT00000051382 | 14,227,015 | INTRONIC              | C | T | - | - |
| F1M1I1_RAT | ENSRNOT00000051382 | 14,227,017 | INTRONIC              | T | C | - | - |
| F1M1I1_RAT | ENSRNOT00000051382 | 14,227,041 | INTRONIC              | G | T | - | - |
| F1M1I1_RAT | ENSRNOT00000051382 | 14,227,409 | INTRONIC              | G | A | - | - |
| F1M1I1_RAT | ENSRNOT00000051382 | 14,227,814 | INTRONIC              | G | A | - | - |
| F1M1I1_RAT | ENSRNOT00000051382 | 14,228,267 | INTRONIC              | G | C | - | - |
| F1M1I1_RAT | ENSRNOT00000051382 | 14,228,335 | INTRONIC              | C | T | - | - |
| F1M1I1_RAT | ENSRNOT00000051382 | 14,229,628 | DOWNSTREAM            | A | G | - | - |
| F1M1I1_RAT | ENSRNOT00000051382 | 14,230,241 | DOWNSTREAM            | C | A | - | - |
| F1M1I1_RAT | ENSRNOT00000051382 | 14,230,617 | DOWNSTREAM            | A | T | - | - |
| F1M1I1_RAT | ENSRNOT00000051382 | 14,230,841 | DOWNSTREAM            | A | G | - | - |
| F1M1I1_RAT | ENSRNOT00000051382 | 14,230,844 | DOWNSTREAM            | G | A | - | - |
| F1M1I1_RAT | ENSRNOT00000051382 | 14,230,893 | DOWNSTREAM            | G | A | - | - |
| F1M1I1_RAT | ENSRNOT00000051382 | 14,230,894 | DOWNSTREAM            | C | G | - | - |
| F1M1I1_RAT | ENSRNOT00000051382 | 14,230,927 | DOWNSTREAM            | A | G | - | - |
| F1M1I1_RAT | ENSRNOT00000051382 | 14,232,015 | DOWNSTREAM            | G | A | - | - |
| F1M1I1_RAT | ENSRNOT00000051382 | 14,232,082 | DOWNSTREAM            | G | A | - | - |
| F1M1I1_RAT | ENSRNOT00000051382 | 14,232,909 | DOWNSTREAM            | C | T | - | - |
| F1M1I1_RAT | ENSRNOT00000051382 | 14,233,447 | DOWNSTREAM            | A | G | - | - |
| F1M1I1_RAT | ENSRNOT00000051382 | 14,233,449 | DOWNSTREAM            | A | G | - | - |
| F1M1I1_RAT | ENSRNOT00000051382 | 14,233,693 | DOWNSTREAM            | C | T | - | - |
| F1M1I1_RAT | ENSRNOT00000051382 | 14,233,896 | DOWNSTREAM            | T | G | - | - |
| F1M1I1_RAT | ENSRNOT00000051382 | 14,234,225 | DOWNSTREAM            | A | C | - | - |
| -          | -                  | 14,234,351 | INTERGENIC            | T | C | - | - |
| -          | -                  | 14,234,776 | INTERGENIC            | C | T | - | - |
| -          | -                  | 14,242,863 | INTERGENIC            | G | A | - | - |
| -          | -                  | 14,242,916 | INTERGENIC            | A | G | - | - |
| -          | -                  | 14,244,353 | INTERGENIC            | T | A | - | - |
| -          | -                  | 14,244,355 | INTERGENIC            | A | T | - | - |
| Gna12      | ENSRNOT00000001654 | 14,282,377 | INTRONIC              | C | G | - | - |
| Gna12      | ENSRNOT00000001654 | 14,295,400 | INTRONIC              | A | G | - | - |
| Gna12      | ENSRNOT00000001654 | 14,305,570 | INTRONIC              | G | A | - | - |
| Gna12      | ENSRNOT00000001654 | 14,309,273 | INTRONIC              | C | A | - | - |
| Gna12      | ENSRNOT00000001654 | 14,309,279 | INTRONIC              | G | C | - | - |
| Gna12      | ENSRNOT00000001654 | 14,309,316 | INTRONIC              | T | A | - | - |
| Gna12      | ENSRNOT00000001654 | 14,309,459 | INTRONIC              | T | A | - | - |
| Gna12      | ENSRNOT00000001654 | 14,309,466 | INTRONIC              | G | A | - | - |
| Gna12      | ENSRNOT00000001654 | 14,314,123 | INTRONIC              | G | C | - | - |
| Gna12      | ENSRNOT00000001654 | 14,315,961 | INTRONIC              | A | G | - | - |
| Gna12      | ENSRNOT00000001654 | 14,318,754 | INTRONIC              | A | G | - | - |
| Gna12      | ENSRNOT00000001654 | 14,332,329 | INTRONIC              | T | C | - | - |

|            |                    |            |                       |   |   |   |   |
|------------|--------------------|------------|-----------------------|---|---|---|---|
| Gna12      | ENSRNOT0000001654  | 14,341,536 | INTRONIC              | T | C | - | - |
| Gna12      | ENSRNOT0000001654  | 14,341,537 | INTRONIC              | C | T | - | - |
| Gna12      | ENSRNOT0000001654  | 14,345,364 | INTRONIC              | A | C | - | - |
| Amz1       | ENSRNOT00000039726 | 14,371,304 | INTRONIC              | T | G | - | - |
| Amz1       | ENSRNOT00000039726 | 14,375,753 | INTRONIC              | T | C | - | - |
| Amz1       | ENSRNOT00000039726 | 14,375,757 | INTRONIC              | T | A | - | - |
| Amz1       | ENSRNOT00000039726 | 14,379,274 | INTRONIC              | G | T | - | - |
| Amz1       | ENSRNOT00000039726 | 14,379,676 | INTRONIC              | A | G | - | - |
| Amz1       | ENSRNOT00000039726 | 14,382,110 | UPSTREAM              | A | G | - | - |
| Amz1       | ENSRNOT00000039726 | 14,382,123 | UPSTREAM              | C | T | - | - |
| Amz1       | ENSRNOT00000039726 | 14,382,176 | UPSTREAM              | C | T | - | - |
| Amz1       | ENSRNOT00000039726 | 14,382,187 | UPSTREAM              | G | A | - | - |
| Amz1       | ENSRNOT00000039726 | 14,382,228 | UPSTREAM              | C | T | - | - |
|            | -                  | 14,393,734 | INTERGENIC            | A | C | - | - |
|            | -                  | 14,393,828 | INTERGENIC            | C | T | - | - |
|            | -                  | 14,394,048 | INTERGENIC            | T | C | - | - |
|            | -                  | 14,394,817 | INTERGENIC            | A | G | - | - |
| RGD1565146 | ENSRNOT00000001661 | 14,395,504 | DOWNSTREAM            | T | A | - | - |
| RGD1565146 | ENSRNOT00000001661 | 14,395,947 | DOWNSTREAM            | T | C | - | - |
| RGD1565146 | ENSRNOT00000001661 | 14,396,094 | DOWNSTREAM            | A | G | - | - |
| RGD1565146 | ENSRNOT00000001661 | 14,396,096 | DOWNSTREAM            | A | G | - | - |
| RGD1565146 | ENSRNOT00000001661 | 14,396,362 | DOWNSTREAM            | T | G | - | - |
| RGD1565146 | ENSRNOT00000001661 | 14,396,364 | DOWNSTREAM            | C | T | - | - |
| RGD1565146 | ENSRNOT00000001661 | 14,396,375 | DOWNSTREAM            | G | A | - | - |
| RGD1565146 | ENSRNOT00000001661 | 14,396,501 | DOWNSTREAM            | G | T | - | - |
| RGD1565146 | ENSRNOT00000001661 | 14,396,533 | DOWNSTREAM            | T | C | - | - |
| RGD1565146 | ENSRNOT00000001661 | 14,396,637 | DOWNSTREAM            | A | G | - | - |
| RGD1565146 | ENSRNOT00000001661 | 14,396,758 | DOWNSTREAM            | C | T | - | - |
| RGD1565146 | ENSRNOT00000001661 | 14,397,731 | DOWNSTREAM            | A | G | - | - |
| RGD1565146 | ENSRNOT00000001661 | 14,398,727 | DOWNSTREAM            | C | T | - | - |
| RGD1565146 | ENSRNOT00000001661 | 14,405,020 | INTRONIC              | G | A | - | - |
| RGD1565146 | ENSRNOT00000001661 | 14,405,240 | INTRONIC              | T | C | - | - |
| RGD1565146 | ENSRNOT00000001661 | 14,406,110 | NON_SYNONYMOUS_CODING | A | G | V | A |
| RGD1565146 | ENSRNOT00000001661 | 14,406,847 | INTRONIC              | C | T | - | - |
| RGD1565146 | ENSRNOT00000001661 | 14,408,261 | INTRONIC              | G | A | - | - |
| RGD1565146 | ENSRNOT00000001661 | 14,408,870 | INTRONIC              | C | A | - | - |
| RGD1565146 | ENSRNOT00000001661 | 14,409,347 | INTRONIC              | A | C | - | - |
| RGD1565146 | ENSRNOT00000001661 | 14,413,076 | UPSTREAM              | G | A | - | - |
| lqce       | ENSRNOT00000001667 | 14,416,906 | INTRONIC              | C | T | - | - |
| lqce       | ENSRNOT00000001667 | 14,417,159 | INTRONIC              | G | A | - | - |
| lqce       | ENSRNOT00000001667 | 14,423,736 | INTRONIC              | A | G | - | - |
| lqce       | ENSRNOT00000001667 | 14,424,355 | INTRONIC              | G | T | - | - |
| lqce       | ENSRNOT00000001667 | 14,424,366 | INTRONIC              | G | A | - | - |
| lqce       | ENSRNOT00000001667 | 14,424,369 | INTRONIC              | C | T | - | - |
| lqce       | ENSRNOT00000001667 | 14,424,419 | INTRONIC              | G | A | - | - |
| lqce       | ENSRNOT00000001667 | 14,424,522 | INTRONIC              | G | A | - | - |
| lqce       | ENSRNOT00000001667 | 14,424,552 | INTRONIC              | A | G | - | - |
| lqce       | ENSRNOT00000001667 | 14,424,713 | INTRONIC              | A | G | - | - |
| lqce       | ENSRNOT00000001667 | 14,424,717 | INTRONIC              | C | T | - | - |
| lqce       | ENSRNOT00000001667 | 14,424,841 | INTRONIC              | A | C | - | - |
| lqce       | ENSRNOT00000001667 | 14,425,223 | INTRONIC              | G | A | - | - |
| lqce       | ENSRNOT00000001667 | 14,425,238 | INTRONIC              | T | C | - | - |
| lqce       | ENSRNOT00000001667 | 14,426,750 | INTRONIC              | T | A | - | - |
| lqce       | ENSRNOT00000001667 | 14,427,648 | INTRONIC              | G | A | - | - |
| lqce       | ENSRNOT00000001667 | 14,428,521 | INTRONIC              | A | C | - | - |
| lqce       | ENSRNOT00000001667 | 14,428,540 | INTRONIC              | A | G | - | - |
| lqce       | ENSRNOT00000001667 | 14,428,574 | INTRONIC              | C | A | - | - |
| lqce       | ENSRNOT00000001667 | 14,428,847 | INTRONIC              | A | T | - | - |
| lqce       | ENSRNOT00000001667 | 14,429,020 | INTRONIC              | A | G | - | - |
| lqce       | ENSRNOT00000001667 | 14,432,452 | INTRONIC              | C | T | - | - |
| lqce       | ENSRNOT00000001667 | 14,435,262 | INTRONIC              | T | C | - | - |
| lqce       | ENSRNOT00000001667 | 14,436,371 | INTRONIC              | G | A | - | - |
| lqce       | ENSRNOT00000001667 | 14,436,933 | INTRONIC              | G | A | - | - |
| lqce       | ENSRNOT00000001667 | 14,437,043 | INTRONIC              | C | T | - | - |
| lqce       | ENSRNOT00000001667 | 14,437,675 | INTRONIC              | T | C | - | - |
| lqce       | ENSRNOT00000001667 | 14,439,017 | INTRONIC              | T | C | - | - |
| lqce       | ENSRNOT00000001667 | 14,440,403 | INTRONIC              | A | G | - | - |
| lqce       | ENSRNOT00000001667 | 14,440,404 | INTRONIC              | A | G | - | - |
| lqce       | ENSRNOT00000001667 | 14,441,718 | SYNONYMOUS_CODING     | A | G | - | - |
| lqce       | ENSRNOT00000001667 | 14,442,003 | INTRONIC              | G | A | - | - |
| lqce       | ENSRNOT00000001667 | 14,442,535 | INTRONIC              | A | T | - | - |
| lqce       | ENSRNOT00000001667 | 14,443,400 | INTRONIC              | C | T | - | - |
| lqce       | ENSRNOT00000001667 | 14,443,571 | INTRONIC              | C | T | - | - |
| lqce       | ENSRNOT00000001667 | 14,443,729 | INTRONIC              | C | T | - | - |
| lqce       | ENSRNOT00000001667 | 14,443,911 | INTRONIC              | A | G | - | - |
| lqce       | ENSRNOT00000001667 | 14,446,164 | INTRONIC              | A | G | - | - |
| lqce       | ENSRNOT00000001667 | 14,446,465 | INTRONIC              | G | C | - | - |
| lqce       | ENSRNOT00000001667 | 14,446,741 | INTRONIC              | G | A | - | - |
| lqce       | ENSRNOT00000001667 | 14,448,569 | INTRONIC              | A | C | - | - |
| lqce       | ENSRNOT00000001667 | 14,451,730 | DOWNSTREAM            | C | T | - | - |

|       |                    |            |                       |   |   |   |   |
|-------|--------------------|------------|-----------------------|---|---|---|---|
| lqce  | ENSRNOT0000001667  | 14,456,028 | DOWNSTREAM            | C | T | - | - |
| lqce  | ENSRNOT0000001667  | 14,456,067 | DOWNSTREAM            | A | C | - | - |
| lqce  | ENSRNOT0000001667  | 14,456,196 | DOWNSTREAM            | C | T | - | - |
| lqce  | ENSRNOT0000001667  | 14,456,358 | DOWNSTREAM            | C | T | - | - |
|       | -                  | 14,456,485 | INTERGENIC            | A | G | - | - |
|       | -                  | 14,456,511 | INTERGENIC            | G | A | - | - |
|       | -                  | 14,456,584 | INTERGENIC            | C | T | - | - |
|       | -                  | 14,456,672 | INTERGENIC            | C | T | - | - |
|       | -                  | 14,456,811 | INTERGENIC            | C | T | - | - |
|       | -                  | 14,456,920 | INTERGENIC            | A | G | - | - |
|       | -                  | 14,456,934 | INTERGENIC            | C | G | - | - |
|       | -                  | 14,456,962 | INTERGENIC            | C | T | - | - |
|       | -                  | 14,456,989 | INTERGENIC            | A | G | - | - |
|       | -                  | 14,457,115 | INTERGENIC            | G | A | - | - |
|       | -                  | 14,458,008 | INTERGENIC            | G | A | - | - |
|       | -                  | 14,458,172 | INTERGENIC            | T | C | - | - |
| Ttyh3 | ENSRNOT00000038773 | 14,458,943 | UPSTREAM              | C | T | - | - |
| Ttyh3 | ENSRNOT00000038773 | 14,458,957 | UPSTREAM              | A | T | - | - |
| Ttyh3 | ENSRNOT00000038773 | 14,459,043 | UPSTREAM              | C | T | - | - |
| Ttyh3 | ENSRNOT00000038773 | 14,460,169 | UPSTREAM              | A | G | - | - |
| Ttyh3 | ENSRNOT00000038773 | 14,460,605 | UPSTREAM              | G | A | - | - |
| Ttyh3 | ENSRNOT00000038773 | 14,461,728 | UPSTREAM              | T | C | - | - |
| Ttyh3 | ENSRNOT00000038773 | 14,461,960 | UPSTREAM              | A | G | - | - |
| Ttyh3 | ENSRNOT00000038773 | 14,462,050 | UPSTREAM              | A | G | - | - |
| Ttyh3 | ENSRNOT00000038773 | 14,462,749 | UPSTREAM              | T | C | - | - |
| Ttyh3 | ENSRNOT00000038773 | 14,463,048 | UPSTREAM              | A | T | - | - |
| Ttyh3 | ENSRNOT00000038773 | 14,464,985 | INTRONIC              | A | C | - | - |
| Ttyh3 | ENSRNOT00000038773 | 14,465,009 | INTRONIC              | A | G | - | - |
| Ttyh3 | ENSRNOT00000038773 | 14,465,989 | INTRONIC              | G | C | - | - |
| Ttyh3 | ENSRNOT00000038773 | 14,467,483 | INTRONIC              | C | T | - | - |
| Ttyh3 | ENSRNOT00000038773 | 14,467,767 | INTRONIC              | A | G | - | - |
| Ttyh3 | ENSRNOT00000038773 | 14,467,983 | INTRONIC              | G | A | - | - |
| Ttyh3 | ENSRNOT00000038773 | 14,468,057 | INTRONIC              | G | T | - | - |
| Ttyh3 | ENSRNOT00000038773 | 14,468,177 | INTRONIC              | T | C | - | - |
| Ttyh3 | ENSRNOT00000038773 | 14,469,346 | INTRONIC              | G | C | - | - |
| Ttyh3 | ENSRNOT00000038773 | 14,470,217 | INTRONIC              | A | C | - | - |
| Ttyh3 | ENSRNOT00000038773 | 14,470,412 | INTRONIC              | A | G | - | - |
| Ttyh3 | ENSRNOT00000038773 | 14,470,455 | INTRONIC              | T | C | - | - |
| Ttyh3 | ENSRNOT00000038773 | 14,470,522 | INTRONIC              | T | C | - | - |
| Ttyh3 | ENSRNOT00000038773 | 14,470,526 | INTRONIC              | A | G | - | - |
| Ttyh3 | ENSRNOT00000038773 | 14,470,542 | INTRONIC              | A | G | - | - |
| Ttyh3 | ENSRNOT00000038773 | 14,470,665 | INTRONIC              | G | A | - | - |
| Ttyh3 | ENSRNOT00000038773 | 14,472,217 | INTRONIC              | T | C | - | - |
| Ttyh3 | ENSRNOT00000038773 | 14,472,561 | INTRONIC              | T | A | - | - |
| Ttyh3 | ENSRNOT00000038773 | 14,472,778 | INTRONIC              | C | T | - | - |
| Ttyh3 | ENSRNOT00000038773 | 14,473,700 | INTRONIC              | A | G | - | - |
| Ttyh3 | ENSRNOT00000038773 | 14,473,794 | INTRONIC              | G | T | - | - |
| Ttyh3 | ENSRNOT00000038773 | 14,473,796 | INTRONIC              | G | T | - | - |
| Ttyh3 | ENSRNOT00000038773 | 14,474,951 | INTRONIC              | C | T | - | - |
| Ttyh3 | ENSRNOT00000038773 | 14,475,007 | INTRONIC              | A | G | - | - |
| Ttyh3 | ENSRNOT00000038773 | 14,475,288 | INTRONIC              | T | C | - | - |
| Ttyh3 | ENSRNOT00000038773 | 14,475,415 | INTRONIC              | A | G | - | - |
| Ttyh3 | ENSRNOT00000038773 | 14,476,009 | INTRONIC              | G | C | - | - |
| Ttyh3 | ENSRNOT00000038773 | 14,476,082 | INTRONIC              | C | T | - | - |
| Ttyh3 | ENSRNOT00000038773 | 14,476,452 | INTRONIC              | T | C | - | - |
| Ttyh3 | ENSRNOT00000038773 | 14,477,563 | INTRONIC              | G | A | - | - |
| Ttyh3 | ENSRNOT00000038773 | 14,477,673 | INTRONIC              | T | C | - | - |
| Ttyh3 | ENSRNOT00000038773 | 14,477,837 | INTRONIC              | C | G | - | - |
| Ttyh3 | ENSRNOT00000038773 | 14,477,854 | INTRONIC              | T | G | - | - |
| Ttyh3 | ENSRNOT00000038773 | 14,478,455 | INTRONIC              | G | A | - | - |
| Ttyh3 | ENSRNOT00000038773 | 14,479,128 | SPLICE_SITE,INTRONIC  | T | C | - | - |
| Ttyh3 | ENSRNOT00000038773 | 14,479,159 | SYNONYMOUS_CODING     | C | T | - | - |
| Ttyh3 | ENSRNOT00000038773 | 14,479,391 | INTRONIC              | G | A | - | - |
| Ttyh3 | ENSRNOT00000038773 | 14,480,031 | INTRONIC              | A | G | - | - |
| Ttyh3 | ENSRNOT00000038773 | 14,480,874 | NON_SYNONYMOUS_CODING | A | C | N | T |
| Ttyh3 | ENSRNOT00000038773 | 14,481,140 | INTRONIC              | T | C | - | - |
| Ttyh3 | ENSRNOT00000038773 | 14,481,199 | INTRONIC              | C | T | - | - |
| Ttyh3 | ENSRNOT00000038773 | 14,481,588 | INTRONIC              | C | T | - | - |
| Ttyh3 | ENSRNOT00000038773 | 14,481,724 | INTRONIC              | A | G | - | - |
| Ttyh3 | ENSRNOT00000038773 | 14,481,962 | INTRONIC              | A | G | - | - |
| Ttyh3 | ENSRNOT00000038773 | 14,482,703 | INTRONIC              | C | T | - | - |
| Ttyh3 | ENSRNOT00000038773 | 14,483,447 | INTRONIC              | T | C | - | - |
| Ttyh3 | ENSRNOT00000038773 | 14,483,818 | INTRONIC              | G | A | - | - |
| Ttyh3 | ENSRNOT00000038773 | 14,484,188 | INTRONIC              | G | C | - | - |
| Ttyh3 | ENSRNOT00000038773 | 14,484,327 | INTRONIC              | A | G | - | - |
| Ttyh3 | ENSRNOT00000038773 | 14,484,435 | INTRONIC              | G | A | - | - |
| Ttyh3 | ENSRNOT00000038773 | 14,484,692 | INTRONIC              | A | G | - | - |
| Ttyh3 | ENSRNOT00000038773 | 14,484,719 | INTRONIC              | T | G | - | - |
| Ttyh3 | ENSRNOT00000038773 | 14,485,205 | INTRONIC              | G | A | - | - |
| Ttyh3 | ENSRNOT00000038773 | 14,485,325 | INTRONIC              | A | G | - | - |

|       |                    |            |            |   |   |   |   |
|-------|--------------------|------------|------------|---|---|---|---|
| Ttyh3 | ENSRNOT00000038773 | 14,485,720 | INTRONIC   | A | G | - | - |
| Ttyh3 | ENSRNOT00000038773 | 14,485,853 | INTRONIC   | C | G | - | - |
| Ttyh3 | ENSRNOT00000038773 | 14,486,641 | INTRONIC   | C | T | - | - |
| Ttyh3 | ENSRNOT00000038773 | 14,490,066 | 3PRIME_UTR | A | G | - | - |
| Ttyh3 | ENSRNOT00000038773 | 14,491,285 | 3PRIME_UTR | A | G | - | - |
| Ttyh3 | ENSRNOT00000038773 | 14,491,366 | 3PRIME_UTR | G | A | - | - |
| Ttyh3 | ENSRNOT00000038773 | 14,492,387 | DOWNSTREAM | T | C | - | - |
| Ttyh3 | ENSRNOT00000038773 | 14,492,395 | DOWNSTREAM | A | C | - | - |
| Ttyh3 | ENSRNOT00000038773 | 14,492,482 | DOWNSTREAM | A | G | - | - |
| Ttyh3 | ENSRNOT00000038773 | 14,492,647 | DOWNSTREAM | G | A | - | - |
| Lfng  | ENSRNOT00000001682 | 14,492,803 | DOWNSTREAM | A | G | - | - |
| Lfng  | ENSRNOT00000001682 | 14,492,824 | DOWNSTREAM | C | A | - | - |
| Lfng  | ENSRNOT00000001682 | 14,493,264 | DOWNSTREAM | G | A | - | - |
| Lfng  | ENSRNOT00000001682 | 14,493,480 | DOWNSTREAM | G | A | - | - |
| Lfng  | ENSRNOT00000001682 | 14,493,519 | DOWNSTREAM | C | A | - | - |
| Lfng  | ENSRNOT00000001682 | 14,493,532 | DOWNSTREAM | A | G | - | - |
| Lfng  | ENSRNOT00000001682 | 14,494,156 | DOWNSTREAM | G | A | - | - |
| Lfng  | ENSRNOT00000001682 | 14,495,408 | DOWNSTREAM | A | T | - | - |
| Lfng  | ENSRNOT00000001682 | 14,496,236 | DOWNSTREAM | T | C | - | - |
| Lfng  | ENSRNOT00000001682 | 14,500,437 | INTRONIC   | A | G | - | - |
| Lfng  | ENSRNOT00000001682 | 14,501,163 | INTRONIC   | T | C | - | - |
| Lfng  | ENSRNOT00000001682 | 14,501,636 | INTRONIC   | T | A | - | - |
| Lfng  | ENSRNOT00000001682 | 14,502,593 | INTRONIC   | G | A | - | - |
| Lfng  | ENSRNOT00000001682 | 14,503,615 | INTRONIC   | T | C | - | - |
| Lfng  | ENSRNOT00000001682 | 14,505,916 | UPSTREAM   | C | A | - | - |
| Lfng  | ENSRNOT00000001682 | 14,506,116 | UPSTREAM   | G | A | - | - |
| Lfng  | ENSRNOT00000001682 | 14,506,611 | UPSTREAM   | A | G | - | - |
| Lfng  | ENSRNOT00000001682 | 14,507,809 | UPSTREAM   | C | T | - | - |
| Lfng  | ENSRNOT00000001682 | 14,507,844 | UPSTREAM   | C | G | - | - |
| Lfng  | ENSRNOT00000001682 | 14,507,888 | UPSTREAM   | G | A | - | - |
| Lfng  | ENSRNOT00000001682 | 14,508,176 | UPSTREAM   | A | G | - | - |
| Lfng  | ENSRNOT00000001682 | 14,508,445 | UPSTREAM   | C | T | - | - |
| Lfng  | ENSRNOT00000001682 | 14,508,652 | UPSTREAM   | G | A | - | - |
| Lfng  | ENSRNOT00000001682 | 14,508,683 | UPSTREAM   | C | T | - | - |
| Lfng  | ENSRNOT00000001682 | 14,508,727 | UPSTREAM   | T | C | - | - |
| Lfng  | ENSRNOT00000001682 | 14,509,057 | UPSTREAM   | T | C | - | - |
| Lfng  | ENSRNOT00000001682 | 14,509,079 | UPSTREAM   | G | A | - | - |
| Lfng  | ENSRNOT00000001682 | 14,509,084 | UPSTREAM   | G | A | - | - |
| Lfng  | ENSRNOT00000001682 | 14,509,163 | UPSTREAM   | T | C | - | - |
| Lfng  | ENSRNOT00000001682 | 14,509,189 | UPSTREAM   | T | C | - | - |
| Lfng  | ENSRNOT00000001682 | 14,509,747 | UPSTREAM   | T | C | - | - |
| Lfng  | ENSRNOT00000001682 | 14,509,811 | UPSTREAM   | T | C | - | - |
| Lfng  | ENSRNOT00000001682 | 14,510,013 | UPSTREAM   | G | A | - | - |
| Lfng  | ENSRNOT00000001682 | 14,510,437 | UPSTREAM   | G | A | - | - |
| -     | -                  | 14,510,930 | INTERGENIC | G | A | - | - |
| -     | -                  | 14,510,933 | INTERGENIC | G | A | - | - |
| -     | -                  | 14,510,987 | INTERGENIC | G | C | - | - |
| -     | -                  | 14,511,101 | INTERGENIC | A | G | - | - |
| -     | -                  | 14,511,588 | INTERGENIC | A | G | - | - |
| -     | -                  | 14,511,737 | INTERGENIC | T | C | - | - |
| -     | -                  | 14,511,892 | INTERGENIC | G | T | - | - |
| -     | -                  | 14,512,391 | INTERGENIC | A | G | - | - |
| -     | -                  | 14,512,452 | INTERGENIC | T | C | - | - |
| -     | -                  | 14,512,453 | INTERGENIC | G | A | - | - |
| -     | -                  | 14,512,464 | INTERGENIC | T | C | - | - |
| -     | -                  | 14,512,465 | INTERGENIC | G | A | - | - |
| -     | -                  | 14,512,504 | INTERGENIC | C | T | - | - |
| -     | -                  | 14,512,510 | INTERGENIC | G | A | - | - |
| -     | -                  | 14,512,550 | INTERGENIC | T | C | - | - |
| -     | -                  | 14,514,061 | INTERGENIC | A | G | - | - |
| -     | -                  | 14,514,834 | INTERGENIC | G | A | - | - |
| -     | -                  | 14,515,718 | INTERGENIC | C | T | - | - |
| -     | -                  | 14,515,720 | INTERGENIC | T | C | - | - |
| -     | -                  | 14,515,773 | INTERGENIC | C | T | - | - |
| -     | -                  | 14,516,259 | INTERGENIC | T | C | - | - |
| -     | -                  | 14,516,432 | INTERGENIC | G | A | - | - |
| -     | -                  | 14,516,492 | INTERGENIC | C | A | - | - |
| -     | -                  | 14,516,791 | INTERGENIC | A | G | - | - |
| -     | -                  | 14,516,927 | INTERGENIC | C | T | - | - |
| -     | -                  | 14,517,063 | INTERGENIC | C | A | - | - |
| -     | -                  | 14,517,488 | INTERGENIC | C | T | - | - |
| -     | -                  | 14,517,688 | INTERGENIC | G | T | - | - |
| -     | -                  | 14,517,812 | INTERGENIC | A | G | - | - |
| -     | -                  | 14,518,112 | INTERGENIC | T | C | - | - |
| -     | -                  | 14,518,934 | INTERGENIC | C | T | - | - |
| -     | -                  | 14,518,936 | INTERGENIC | T | C | - | - |
| -     | -                  | 14,519,109 | INTERGENIC | G | A | - | - |
| -     | -                  | 14,519,971 | INTERGENIC | T | C | - | - |
| -     | -                  | 14,519,972 | INTERGENIC | C | T | - | - |
| -     | -                  | 14,520,783 | INTERGENIC | T | G | - | - |

|        |                    |            |            |   |   |   |   |
|--------|--------------------|------------|------------|---|---|---|---|
| -      |                    | 14,521,025 | INTERGENIC | A | G | - | - |
| -      |                    | 14,521,368 | INTERGENIC | A | C | - | - |
| -      |                    | 14,522,081 | INTERGENIC | G | A | - | - |
| -      |                    | 14,522,178 | INTERGENIC | T | C | - | - |
| -      |                    | 14,522,788 | INTERGENIC | A | G | - | - |
| -      |                    | 14,523,034 | INTERGENIC | T | C | - | - |
| -      |                    | 14,523,527 | INTERGENIC | T | C | - | - |
| -      |                    | 14,523,743 | INTERGENIC | C | A | - | - |
| -      |                    | 14,523,750 | INTERGENIC | T | A | - | - |
| -      |                    | 14,523,922 | INTERGENIC | A | G | - | - |
| -      |                    | 14,524,910 | INTERGENIC | C | T | - | - |
| -      |                    | 14,525,328 | INTERGENIC | T | C | - | - |
| -      |                    | 14,525,565 | INTERGENIC | C | T | - | - |
| -      |                    | 14,526,324 | INTERGENIC | T | G | - | - |
| -      |                    | 14,526,325 | INTERGENIC | T | G | - | - |
| -      |                    | 14,527,028 | INTERGENIC | G | A | - | - |
| -      |                    | 14,528,214 | INTERGENIC | T | C | - | - |
| -      |                    | 14,528,275 | INTERGENIC | G | A | - | - |
| -      |                    | 14,528,811 | INTERGENIC | G | A | - | - |
| -      |                    | 14,529,270 | INTERGENIC | G | C | - | - |
| -      |                    | 14,529,607 | INTERGENIC | C | G | - | - |
| -      |                    | 14,531,119 | INTERGENIC | T | C | - | - |
| -      |                    | 14,531,595 | INTERGENIC | A | G | - | - |
| -      |                    | 14,532,105 | INTERGENIC | A | G | - | - |
| -      |                    | 14,532,120 | INTERGENIC | G | A | - | - |
| -      |                    | 14,532,368 | INTERGENIC | T | C | - | - |
| -      |                    | 14,532,384 | INTERGENIC | G | C | - | - |
| -      |                    | 14,532,404 | INTERGENIC | C | G | - | - |
| -      |                    | 14,533,193 | INTERGENIC | C | T | - | - |
| -      |                    | 14,533,249 | INTERGENIC | C | T | - | - |
| -      |                    | 14,534,652 | INTERGENIC | G | A | - | - |
| -      |                    | 14,534,718 | INTERGENIC | T | G | - | - |
| -      |                    | 14,534,869 | INTERGENIC | A | T | - | - |
| -      |                    | 14,535,118 | INTERGENIC | G | A | - | - |
| -      |                    | 14,535,132 | INTERGENIC | A | T | - | - |
| -      |                    | 14,535,746 | INTERGENIC | C | T | - | - |
| -      |                    | 14,535,747 | INTERGENIC | G | C | - | - |
| -      |                    | 14,535,831 | INTERGENIC | T | C | - | - |
| -      |                    | 14,535,884 | INTERGENIC | G | A | - | - |
| -      |                    | 14,536,237 | INTERGENIC | C | T | - | - |
| -      |                    | 14,536,482 | INTERGENIC | G | A | - | - |
| -      |                    | 14,536,790 | INTERGENIC | C | T | - | - |
| -      |                    | 14,536,796 | INTERGENIC | T | C | - | - |
| -      |                    | 14,537,061 | INTERGENIC | G | C | - | - |
| -      |                    | 14,537,744 | INTERGENIC | A | T | - | - |
| -      |                    | 14,538,271 | INTERGENIC | G | A | - | - |
| -      |                    | 14,538,276 | INTERGENIC | G | A | - | - |
| -      |                    | 14,539,327 | INTERGENIC | T | G | - | - |
| -      |                    | 14,540,233 | INTERGENIC | G | T | - | - |
| -      |                    | 14,540,413 | INTERGENIC | A | G | - | - |
| -      |                    | 14,540,696 | INTERGENIC | C | T | - | - |
| -      |                    | 14,540,790 | INTERGENIC | T | C | - | - |
| -      |                    | 14,540,836 | INTERGENIC | T | C | - | - |
| -      |                    | 14,540,865 | INTERGENIC | T | C | - | - |
| -      |                    | 14,540,906 | INTERGENIC | A | C | - | - |
| -      |                    | 14,540,980 | INTERGENIC | G | T | - | - |
| -      |                    | 14,540,986 | INTERGENIC | T | C | - | - |
| -      |                    | 14,541,106 | INTERGENIC | C | T | - | - |
| -      |                    | 14,541,177 | INTERGENIC | A | G | - | - |
| -      |                    | 14,541,486 | INTERGENIC | A | G | - | - |
| -      |                    | 14,541,567 | INTERGENIC | T | C | - | - |
| -      |                    | 14,541,690 | INTERGENIC | A | T | - | - |
| -      |                    | 14,541,779 | INTERGENIC | G | A | - | - |
| -      |                    | 14,541,817 | INTERGENIC | C | T | - | - |
| -      |                    | 14,541,834 | INTERGENIC | C | T | - | - |
| -      |                    | 14,541,879 | INTERGENIC | T | C | - | - |
| -      |                    | 14,541,883 | INTERGENIC | A | G | - | - |
| -      |                    | 14,541,926 | INTERGENIC | A | G | - | - |
| -      |                    | 14,542,119 | INTERGENIC | G | A | - | - |
| -      |                    | 14,542,194 | INTERGENIC | T | A | - | - |
| -      |                    | 14,542,345 | INTERGENIC | G | A | - | - |
| Grifin | ENSRNOT00000001686 | 14,542,443 | UPSTREAM   | G | A | - | - |
| Grifin | ENSRNOT00000001686 | 14,542,461 | UPSTREAM   | T | C | - | - |
| Grifin | ENSRNOT00000001686 | 14,542,687 | UPSTREAM   | C | T | - | - |
| Grifin | ENSRNOT00000001686 | 14,543,263 | UPSTREAM   | G | A | - | - |
| Grifin | ENSRNOT00000001686 | 14,543,756 | UPSTREAM   | C | G | - | - |
| Grifin | ENSRNOT00000001686 | 14,544,154 | UPSTREAM   | C | T | - | - |
| Grifin | ENSRNOT00000001686 | 14,544,341 | UPSTREAM   | C | T | - | - |
| Grifin | ENSRNOT00000001686 | 14,544,533 | UPSTREAM   | A | G | - | - |
| Grifin | ENSRNOT00000001686 | 14,544,713 | UPSTREAM   | T | C | - | - |

|        |                    |            |            |   |   |   |   |
|--------|--------------------|------------|------------|---|---|---|---|
| Grifin | ENSRNOT00000001686 | 14,544,940 | UPSTREAM   | C | G | - | - |
| Grifin | ENSRNOT00000001686 | 14,544,973 | UPSTREAM   | C | T | - | - |
| Grifin | ENSRNOT00000001686 | 14,545,361 | UPSTREAM   | G | A | - | - |
| Grifin | ENSRNOT00000001686 | 14,545,395 | UPSTREAM   | A | G | - | - |
| Grifin | ENSRNOT00000001686 | 14,545,659 | UPSTREAM   | G | A | - | - |
| Grifin | ENSRNOT00000001686 | 14,545,756 | UPSTREAM   | C | T | - | - |
| Grifin | ENSRNOT00000001686 | 14,545,826 | UPSTREAM   | T | C | - | - |
| Grifin | ENSRNOT00000001686 | 14,546,172 | UPSTREAM   | C | T | - | - |
| Grifin | ENSRNOT00000001686 | 14,546,454 | UPSTREAM   | T | C | - | - |
| Grifin | ENSRNOT00000001686 | 14,546,624 | UPSTREAM   | T | C | - | - |
| Grifin | ENSRNOT00000001686 | 14,546,767 | UPSTREAM   | G | A | - | - |
| Grifin | ENSRNOT00000001686 | 14,546,902 | UPSTREAM   | C | T | - | - |
| Grifin | ENSRNOT00000001686 | 14,547,099 | UPSTREAM   | A | G | - | - |
| Grifin | ENSRNOT00000001686 | 14,547,148 | UPSTREAM   | A | G | - | - |
| Grifin | ENSRNOT00000001686 | 14,547,222 | UPSTREAM   | C | A | - | - |
| Grifin | ENSRNOT00000001686 | 14,547,277 | UPSTREAM   | G | A | - | - |
| Grifin | ENSRNOT00000001686 | 14,547,671 | INTRONIC   | T | C | - | - |
| Grifin | ENSRNOT00000001686 | 14,548,143 | INTRONIC   | G | A | - | - |
| Grifin | ENSRNOT00000001686 | 14,548,398 | INTRONIC   | G | A | - | - |
| Grifin | ENSRNOT00000001686 | 14,549,811 | DOWNSTREAM | G | T | - | - |
| Grifin | ENSRNOT00000001686 | 14,549,813 | DOWNSTREAM | A | G | - | - |
| Grifin | ENSRNOT00000001686 | 14,549,949 | DOWNSTREAM | G | A | - | - |
| Grifin | ENSRNOT00000001686 | 14,549,973 | DOWNSTREAM | T | C | - | - |
| Grifin | ENSRNOT00000001686 | 14,550,107 | DOWNSTREAM | G | C | - | - |
| Grifin | ENSRNOT00000001686 | 14,550,451 | DOWNSTREAM | T | G | - | - |
| Grifin | ENSRNOT00000001686 | 14,551,339 | DOWNSTREAM | T | C | - | - |
| Grifin | ENSRNOT00000001686 | 14,552,152 | DOWNSTREAM | A | G | - | - |
| Grifin | ENSRNOT00000001686 | 14,553,130 | DOWNSTREAM | G | A | - | - |
| Grifin | ENSRNOT00000001686 | 14,553,284 | DOWNSTREAM | A | C | - | - |
| Grifin | ENSRNOT00000001686 | 14,553,297 | DOWNSTREAM | A | C | - | - |
| Grifin | ENSRNOT00000001686 | 14,553,570 | DOWNSTREAM | T | C | - | - |
| Grifin | ENSRNOT00000001686 | 14,553,863 | DOWNSTREAM | A | T | - | - |
| Grifin | ENSRNOT00000001686 | 14,553,994 | DOWNSTREAM | G | A | - | - |
| Grifin | ENSRNOT00000001686 | 14,554,021 | DOWNSTREAM | A | G | - | - |
| -      | -                  | 14,555,003 | INTERGENIC | G | A | - | - |
| -      | -                  | 14,555,795 | INTERGENIC | A | C | - | - |
| -      | -                  | 14,556,052 | INTERGENIC | A | G | - | - |
| -      | -                  | 14,556,073 | INTERGENIC | C | T | - | - |
| -      | -                  | 14,556,126 | INTERGENIC | T | C | - | - |
| -      | -                  | 14,556,135 | INTERGENIC | A | G | - | - |
| -      | -                  | 14,556,180 | INTERGENIC | C | T | - | - |
| -      | -                  | 14,558,054 | INTERGENIC | G | A | - | - |
| -      | -                  | 14,558,101 | INTERGENIC | C | G | - | - |
| -      | -                  | 14,558,698 | INTERGENIC | C | T | - | - |
| -      | -                  | 14,558,827 | INTERGENIC | A | C | - | - |
| -      | -                  | 14,558,907 | INTERGENIC | C | G | - | - |
| -      | -                  | 14,559,084 | INTERGENIC | T | C | - | - |
| -      | -                  | 14,559,085 | INTERGENIC | C | T | - | - |
| -      | -                  | 14,559,124 | INTERGENIC | C | T | - | - |
| -      | -                  | 14,559,355 | INTERGENIC | A | T | - | - |
| -      | -                  | 14,559,527 | INTERGENIC | G | A | - | - |
| -      | -                  | 14,559,926 | INTERGENIC | A | G | - | - |
| -      | -                  | 14,560,025 | INTERGENIC | C | G | - | - |
| -      | -                  | 14,560,026 | INTERGENIC | C | T | - | - |
| -      | -                  | 14,560,111 | INTERGENIC | A | G | - | - |
| -      | -                  | 14,560,463 | INTERGENIC | A | G | - | - |
| -      | -                  | 14,560,464 | INTERGENIC | A | C | - | - |
| -      | -                  | 14,560,794 | INTERGENIC | T | C | - | - |
| -      | -                  | 14,560,801 | INTERGENIC | T | A | - | - |
| -      | -                  | 14,561,054 | INTERGENIC | C | T | - | - |
| -      | -                  | 14,561,056 | INTERGENIC | A | C | - | - |
| -      | -                  | 14,561,083 | INTERGENIC | C | A | - | - |
| -      | -                  | 14,561,132 | INTERGENIC | A | C | - | - |
| -      | -                  | 14,561,179 | INTERGENIC | T | C | - | - |
| -      | -                  | 14,561,243 | INTERGENIC | C | T | - | - |
| -      | -                  | 14,561,244 | INTERGENIC | A | G | - | - |
| -      | -                  | 14,561,289 | INTERGENIC | G | T | - | - |
| -      | -                  | 14,561,330 | INTERGENIC | T | C | - | - |
| -      | -                  | 14,561,334 | INTERGENIC | T | C | - | - |
| -      | -                  | 14,561,545 | INTERGENIC | C | T | - | - |
| -      | -                  | 14,562,555 | INTERGENIC | G | C | - | - |
| -      | -                  | 14,562,851 | INTERGENIC | C | T | - | - |
| -      | -                  | 14,563,276 | INTERGENIC | A | G | - | - |
| -      | -                  | 14,563,427 | INTERGENIC | T | G | - | - |
| -      | -                  | 14,563,428 | INTERGENIC | A | T | - | - |
| -      | -                  | 14,563,955 | INTERGENIC | A | G | - | - |
| -      | -                  | 14,564,083 | INTERGENIC | G | T | - | - |
| -      | -                  | 14,564,084 | INTERGENIC | T | G | - | - |
| -      | -                  | 14,564,179 | INTERGENIC | T | G | - | - |
| -      | -                  | 14,564,502 | INTERGENIC | C | A | - | - |

|        |                    |            |                        |   |   |   |   |
|--------|--------------------|------------|------------------------|---|---|---|---|
| -      |                    | 14,565,363 | INTERGENIC             | T | G | - | - |
| -      |                    | 14,565,885 | INTERGENIC             | G | A | - | - |
| -      |                    | 14,566,079 | INTERGENIC             | G | C | - | - |
| -      |                    | 14,566,080 | INTERGENIC             | C | A | - | - |
| -      |                    | 14,566,901 | INTERGENIC             | T | C | - | - |
| -      |                    | 14,567,738 | INTERGENIC             | T | C | - | - |
| -      |                    | 14,567,777 | INTERGENIC             | T | C | - | - |
| -      |                    | 14,567,974 | INTERGENIC             | T | C | - | - |
| -      |                    | 14,568,344 | INTERGENIC             | T | A | - | - |
| -      |                    | 14,568,583 | INTERGENIC             | G | A | - | - |
| -      |                    | 14,568,804 | INTERGENIC             | A | G | - | - |
| -      |                    | 14,569,520 | INTERGENIC             | G | T | - | - |
| -      |                    | 14,571,505 | INTERGENIC             | C | A | - | - |
| Chst12 | ENSRNOT00000001688 | 14,572,810 | DOWNSTREAM             | T | A | - | - |
| Chst12 | ENSRNOT00000001688 | 14,574,713 | DOWNSTREAM             | C | T | - | - |
| Chst12 | ENSRNOT00000001688 | 14,575,887 | DOWNSTREAM             | A | G | - | - |
| Chst12 | ENSRNOT00000001688 | 14,575,940 | DOWNSTREAM             | G | A | - | - |
| Chst12 | ENSRNOT00000001688 | 14,575,958 | DOWNSTREAM             | C | A | - | - |
| Chst12 | ENSRNOT00000001688 | 14,575,967 | DOWNSTREAM             | C | T | - | - |
| Chst12 | ENSRNOT00000001688 | 14,575,968 | DOWNSTREAM             | A | C | - | - |
| Chst12 | ENSRNOT00000001688 | 14,576,003 | DOWNSTREAM             | C | T | - | - |
| Chst12 | ENSRNOT00000001688 | 14,576,414 | DOWNSTREAM             | G | T | - | - |
| Chst12 | ENSRNOT00000001688 | 14,576,471 | DOWNSTREAM             | G | A | - | - |
| Chst12 | ENSRNOT00000001688 | 14,577,860 | WITHIN_NON_CODING_GENE | G | A | - | - |
| Chst12 | ENSRNOT00000001688 | 14,577,923 | WITHIN_NON_CODING_GENE | C | T | - | - |
| Chst12 | ENSRNOT00000001688 | 14,578,742 | WITHIN_NON_CODING_GENE | T | C | - | - |
| Chst12 | ENSRNOT00000001688 | 14,579,265 | UPSTREAM               | T | A | - | - |
| Chst12 | ENSRNOT00000001688 | 14,579,975 | UPSTREAM               | C | T | - | - |
| Chst12 | ENSRNOT00000001688 | 14,580,735 | UPSTREAM               | C | T | - | - |
| Chst12 | ENSRNOT00000001688 | 14,583,805 | UPSTREAM               | G | A | - | - |
| -      |                    | 14,584,208 | INTERGENIC             | C | T | - | - |
| -      |                    | 14,585,237 | INTERGENIC             | G | A | - | - |
| -      |                    | 14,586,368 | INTERGENIC             | A | G | - | - |
| -      |                    | 14,586,477 | INTERGENIC             | A | C | - | - |
| -      |                    | 14,586,583 | INTERGENIC             | T | C | - | - |
| -      |                    | 14,586,588 | INTERGENIC             | T | C | - | - |
| -      |                    | 14,586,667 | INTERGENIC             | A | G | - | - |
| -      |                    | 14,587,012 | INTERGENIC             | T | C | - | - |
| -      |                    | 14,587,343 | INTERGENIC             | C | T | - | - |
| -      |                    | 14,587,363 | INTERGENIC             | C | T | - | - |
| -      |                    | 14,587,837 | INTERGENIC             | A | G | - | - |
| -      |                    | 14,588,209 | INTERGENIC             | C | T | - | - |
| -      |                    | 14,588,782 | INTERGENIC             | C | T | - | - |
| -      |                    | 14,589,309 | INTERGENIC             | C | T | - | - |
| -      |                    | 14,589,366 | INTERGENIC             | C | T | - | - |
| -      |                    | 14,589,441 | INTERGENIC             | G | A | - | - |
| -      |                    | 14,589,618 | INTERGENIC             | C | T | - | - |
| -      |                    | 14,589,776 | INTERGENIC             | A | C | - | - |
| -      |                    | 14,590,260 | INTERGENIC             | G | A | - | - |
| -      |                    | 14,590,743 | INTERGENIC             | A | G | - | - |
| -      |                    | 14,591,001 | INTERGENIC             | A | T | - | - |
| -      |                    | 14,592,910 | INTERGENIC             | G | C | - | - |
| -      |                    | 14,594,815 | INTERGENIC             | T | C | - | - |
| -      |                    | 14,594,816 | INTERGENIC             | T | C | - | - |
| -      |                    | 14,594,987 | INTERGENIC             | G | T | - | - |
| -      |                    | 14,594,995 | INTERGENIC             | G | A | - | - |
| -      |                    | 14,595,061 | INTERGENIC             | T | C | - | - |
| -      |                    | 14,595,062 | INTERGENIC             | C | T | - | - |
| -      |                    | 14,595,248 | INTERGENIC             | T | G | - | - |
| -      |                    | 14,595,736 | INTERGENIC             | A | G | - | - |
| -      |                    | 14,597,520 | INTERGENIC             | T | C | - | - |
| -      |                    | 14,598,379 | INTERGENIC             | G | A | - | - |
| -      |                    | 14,598,591 | INTERGENIC             | T | C | - | - |
| -      |                    | 14,600,380 | INTERGENIC             | T | A | - | - |
| -      |                    | 14,601,191 | INTERGENIC             | A | G | - | - |
| -      |                    | 14,601,472 | INTERGENIC             | T | C | - | - |
| -      |                    | 14,601,497 | INTERGENIC             | C | T | - | - |
| -      |                    | 14,601,667 | INTERGENIC             | T | C | - | - |
| -      |                    | 14,601,939 | INTERGENIC             | A | T | - | - |
| -      |                    | 14,602,215 | INTERGENIC             | G | T | - | - |
| -      |                    | 14,602,265 | INTERGENIC             | C | A | - | - |
| -      |                    | 14,602,313 | INTERGENIC             | A | G | - | - |
| -      |                    | 14,602,619 | INTERGENIC             | G | C | - | - |
| -      |                    | 14,602,829 | INTERGENIC             | A | G | - | - |
| -      |                    | 14,603,313 | INTERGENIC             | A | G | - | - |
| -      |                    | 14,603,323 | INTERGENIC             | G | A | - | - |
| -      |                    | 14,603,681 | INTERGENIC             | A | G | - | - |
| -      |                    | 14,604,122 | INTERGENIC             | C | A | - | - |
| -      |                    | 14,604,184 | INTERGENIC             | C | T | - | - |
| -      |                    | 14,604,878 | INTERGENIC             | A | G | - | - |

|            |                    |            |            |   |   |   |   |
|------------|--------------------|------------|------------|---|---|---|---|
| -          | -                  | 14,605,006 | INTERGENIC | A | G | - | - |
| -          | -                  | 14,605,051 | INTERGENIC | C | A | - | - |
| -          | -                  | 14,605,203 | INTERGENIC | G | A | - | - |
| -          | -                  | 14,605,290 | INTERGENIC | G | T | - | - |
| -          | -                  | 14,605,404 | INTERGENIC | G | A | - | - |
| -          | -                  | 14,605,414 | INTERGENIC | C | A | - | - |
| -          | -                  | 14,605,455 | INTERGENIC | G | C | - | - |
| -          | -                  | 14,605,479 | INTERGENIC | C | T | - | - |
| -          | -                  | 14,605,560 | INTERGENIC | A | C | - | - |
| -          | -                  | 14,605,992 | INTERGENIC | C | T | - | - |
| -          | -                  | 14,606,723 | INTERGENIC | C | T | - | - |
| -          | -                  | 14,606,749 | INTERGENIC | G | T | - | - |
| -          | -                  | 14,606,770 | INTERGENIC | C | T | - | - |
| -          | -                  | 14,607,577 | INTERGENIC | C | T | - | - |
| -          | -                  | 14,607,630 | INTERGENIC | C | T | - | - |
| -          | -                  | 14,607,651 | INTERGENIC | G | A | - | - |
| -          | -                  | 14,607,860 | INTERGENIC | G | A | - | - |
| -          | -                  | 14,607,912 | INTERGENIC | A | G | - | - |
| -          | -                  | 14,608,196 | INTERGENIC | A | G | - | - |
| -          | -                  | 14,608,277 | INTERGENIC | T | C | - | - |
| -          | -                  | 14,608,895 | INTERGENIC | T | A | - | - |
| -          | -                  | 14,609,155 | INTERGENIC | A | G | - | - |
| -          | -                  | 14,609,608 | INTERGENIC | A | G | - | - |
| -          | -                  | 14,609,814 | INTERGENIC | C | T | - | - |
| -          | -                  | 14,610,000 | INTERGENIC | G | A | - | - |
| -          | -                  | 14,610,055 | INTERGENIC | A | C | - | - |
| -          | -                  | 14,610,311 | INTERGENIC | T | G | - | - |
| -          | -                  | 14,610,798 | INTERGENIC | C | A | - | - |
| -          | -                  | 14,610,966 | INTERGENIC | T | C | - | - |
| -          | -                  | 14,611,066 | INTERGENIC | G | T | - | - |
| -          | -                  | 14,611,811 | INTERGENIC | G | T | - | - |
| -          | -                  | 14,612,273 | INTERGENIC | T | C | - | - |
| -          | -                  | 14,612,429 | INTERGENIC | G | T | - | - |
| -          | -                  | 14,612,557 | INTERGENIC | G | A | - | - |
| -          | -                  | 14,613,418 | INTERGENIC | G | A | - | - |
| -          | -                  | 14,613,491 | INTERGENIC | C | T | - | - |
| -          | -                  | 14,613,797 | INTERGENIC | T | C | - | - |
| -          | -                  | 14,614,184 | INTERGENIC | T | C | - | - |
| -          | -                  | 14,614,917 | INTERGENIC | G | A | - | - |
| -          | -                  | 14,616,095 | INTERGENIC | G | A | - | - |
| -          | -                  | 14,616,458 | INTERGENIC | A | G | - | - |
| -          | -                  | 14,617,408 | INTERGENIC | C | T | - | - |
| -          | -                  | 14,617,841 | INTERGENIC | G | A | - | - |
| -          | -                  | 14,617,844 | INTERGENIC | T | C | - | - |
| -          | -                  | 14,618,783 | INTERGENIC | T | C | - | - |
| -          | -                  | 14,619,134 | INTERGENIC | T | G | - | - |
| -          | -                  | 14,619,135 | INTERGENIC | T | A | - | - |
| -          | -                  | 14,619,277 | INTERGENIC | T | C | - | - |
| -          | -                  | 14,619,418 | INTERGENIC | G | A | - | - |
| -          | -                  | 14,621,099 | INTERGENIC | G | A | - | - |
| -          | -                  | 14,621,533 | INTERGENIC | G | A | - | - |
| -          | -                  | 14,622,457 | INTERGENIC | C | A | - | - |
| -          | -                  | 14,622,463 | INTERGENIC | T | G | - | - |
| -          | -                  | 14,623,016 | INTERGENIC | C | A | - | - |
| -          | -                  | 14,625,564 | INTERGENIC | T | A | - | - |
| -          | -                  | 14,625,686 | INTERGENIC | T | C | - | - |
| -          | -                  | 14,625,728 | INTERGENIC | A | G | - | - |
| -          | -                  | 14,625,736 | INTERGENIC | A | G | - | - |
| -          | -                  | 14,627,442 | INTERGENIC | G | A | - | - |
| -          | -                  | 14,629,168 | INTERGENIC | A | G | - | - |
| F1M821_RAT | ENSRNOT00000060463 | 14,630,385 | DOWNSTREAM | A | T | - | - |
| F1M821_RAT | ENSRNOT00000060463 | 14,630,519 | DOWNSTREAM | C | G | - | - |
| F1M821_RAT | ENSRNOT00000060463 | 14,630,621 | DOWNSTREAM | T | C | - | - |
| F1M821_RAT | ENSRNOT00000060463 | 14,630,667 | DOWNSTREAM | C | T | - | - |
| F1M821_RAT | ENSRNOT00000060463 | 14,630,668 | DOWNSTREAM | A | G | - | - |
| F1M821_RAT | ENSRNOT00000060463 | 14,630,695 | DOWNSTREAM | T | C | - | - |
| F1M821_RAT | ENSRNOT00000060463 | 14,630,799 | DOWNSTREAM | G | A | - | - |
| F1M821_RAT | ENSRNOT00000060463 | 14,630,870 | DOWNSTREAM | A | C | - | - |
| F1M821_RAT | ENSRNOT00000060463 | 14,630,999 | DOWNSTREAM | C | T | - | - |
| F1M821_RAT | ENSRNOT00000060463 | 14,631,059 | DOWNSTREAM | G | A | - | - |
| F1M821_RAT | ENSRNOT00000060463 | 14,631,133 | DOWNSTREAM | C | A | - | - |
| F1M821_RAT | ENSRNOT00000060463 | 14,631,153 | DOWNSTREAM | C | A | - | - |
| F1M821_RAT | ENSRNOT00000060463 | 14,631,259 | DOWNSTREAM | T | C | - | - |
| F1M821_RAT | ENSRNOT00000060463 | 14,631,332 | DOWNSTREAM | G | A | - | - |
| F1M821_RAT | ENSRNOT00000060463 | 14,631,477 | DOWNSTREAM | C | A | - | - |
| F1M821_RAT | ENSRNOT00000060463 | 14,631,525 | DOWNSTREAM | A | C | - | - |
| F1M821_RAT | ENSRNOT00000060463 | 14,631,626 | DOWNSTREAM | A | G | - | - |
| F1M821_RAT | ENSRNOT00000060463 | 14,631,691 | DOWNSTREAM | T | C | - | - |
| F1M821_RAT | ENSRNOT00000060463 | 14,631,695 | DOWNSTREAM | T | G | - | - |
| F1M821_RAT | ENSRNOT00000060463 | 14,631,742 | DOWNSTREAM | C | T | - | - |



|            |                   |            |                      |   |   |   |   |
|------------|-------------------|------------|----------------------|---|---|---|---|
| F1M821_RAT | ENSRNOT0000060463 | 14,631,749 | DOWNSTREAM           | T | A | - | - |
| F1M821_RAT | ENSRNOT0000060463 | 14,631,826 | DOWNSTREAM           | A | G | - | - |
| F1M821_RAT | ENSRNOT0000060463 | 14,631,925 | DOWNSTREAM           | T | C | - | - |
| F1M821_RAT | ENSRNOT0000060463 | 14,632,018 | DOWNSTREAM           | T | C | - | - |
| F1M821_RAT | ENSRNOT0000060463 | 14,632,031 | DOWNSTREAM           | A | G | - | - |
| F1M821_RAT | ENSRNOT0000060463 | 14,632,157 | DOWNSTREAM           | T | C | - | - |
| F1M821_RAT | ENSRNOT0000060463 | 14,632,184 | DOWNSTREAM           | G | C | - | - |
| F1M821_RAT | ENSRNOT0000060463 | 14,632,186 | DOWNSTREAM           | T | C | - | - |
| F1M821_RAT | ENSRNOT0000060463 | 14,632,600 | DOWNSTREAM           | C | T | - | - |
| F1M821_RAT | ENSRNOT0000060463 | 14,632,621 | DOWNSTREAM           | A | G | - | - |
| F1M821_RAT | ENSRNOT0000060463 | 14,632,748 | DOWNSTREAM           | T | C | - | - |
| F1M821_RAT | ENSRNOT0000060463 | 14,632,850 | DOWNSTREAM           | C | T | - | - |
| F1M821_RAT | ENSRNOT0000060463 | 14,632,865 | DOWNSTREAM           | G | A | - | - |
| F1M821_RAT | ENSRNOT0000060463 | 14,632,893 | DOWNSTREAM           | A | G | - | - |
| F1M821_RAT | ENSRNOT0000060463 | 14,633,176 | DOWNSTREAM           | G | A | - | - |
| F1M821_RAT | ENSRNOT0000060463 | 14,633,805 | DOWNSTREAM           | G | A | - | - |
| U6         | ENSRNOT0000053993 | 14,634,668 | UPSTREAM             | C | G | - | - |
| U6         | ENSRNOT0000053993 | 14,636,964 | UPSTREAM             | C | G | - | - |
| U6         | ENSRNOT0000053993 | 14,639,179 | UPSTREAM             | C | A | - | - |
| U6         | ENSRNOT0000053993 | 14,639,611 | DOWNSTREAM           | G | A | - | - |
| U6         | ENSRNOT0000053993 | 14,640,710 | DOWNSTREAM           | G | A | - | - |
| U6         | ENSRNOT0000053993 | 14,640,785 | DOWNSTREAM           | A | C | - | - |
| U6         | ENSRNOT0000053993 | 14,640,921 | DOWNSTREAM           | T | G | - | - |
| U6         | ENSRNOT0000053993 | 14,641,382 | DOWNSTREAM           | T | A | - | - |
| U6         | ENSRNOT0000053993 | 14,641,714 | DOWNSTREAM           | G | T | - | - |
| U6         | ENSRNOT0000053993 | 14,642,828 | DOWNSTREAM           | G | A | - | - |
| U6         | ENSRNOT0000053993 | 14,643,645 | DOWNSTREAM           | A | G | - | - |
| F1M821_RAT | ENSRNOT0000060463 | 14,645,869 | INTRONIC             | T | C | - | - |
| F1M821_RAT | ENSRNOT0000060463 | 14,646,250 | INTRONIC             | A | G | - | - |
| F1M821_RAT | ENSRNOT0000060463 | 14,646,592 | INTRONIC             | A | G | - | - |
| F1M821_RAT | ENSRNOT0000060463 | 14,647,526 | INTRONIC             | G | A | - | - |
| F1M821_RAT | ENSRNOT0000060463 | 14,647,543 | INTRONIC             | G | C | - | - |
| F1M821_RAT | ENSRNOT0000060463 | 14,647,741 | INTRONIC             | A | G | - | - |
| F1M821_RAT | ENSRNOT0000060463 | 14,647,791 | SPLICE_SITE,INTRONIC | C | T | - | - |
| F1M821_RAT | ENSRNOT0000060463 | 14,648,604 | INTRONIC             | G | A | - | - |
| F1M821_RAT | ENSRNOT0000060463 | 14,649,243 | INTRONIC             | C | A | - | - |
| F1M821_RAT | ENSRNOT0000060463 | 14,649,389 | INTRONIC             | C | T | - | - |
| F1M821_RAT | ENSRNOT0000060463 | 14,649,436 | INTRONIC             | T | A | - | - |
| F1M821_RAT | ENSRNOT0000060463 | 14,651,200 | INTRONIC             | A | G | - | - |
| F1M821_RAT | ENSRNOT0000060463 | 14,653,009 | INTRONIC             | A | G | - | - |
| F1M821_RAT | ENSRNOT0000060463 | 14,653,754 | INTRONIC             | T | C | - | - |
| F1M821_RAT | ENSRNOT0000060463 | 14,654,830 | INTRONIC             | C | T | - | - |
| F1M821_RAT | ENSRNOT0000060463 | 14,655,305 | INTRONIC             | G | A | - | - |
| F1M821_RAT | ENSRNOT0000060463 | 14,655,332 | INTRONIC             | A | G | - | - |
| F1M821_RAT | ENSRNOT0000060463 | 14,655,502 | INTRONIC             | A | C | - | - |
| F1M821_RAT | ENSRNOT0000060463 | 14,656,548 | INTRONIC             | T | C | - | - |
| F1M821_RAT | ENSRNOT0000060463 | 14,657,845 | INTRONIC             | G | A | - | - |
| Eif3b      | ENSRNOT0000001689 | 14,663,264 | DOWNSTREAM           | T | C | - | - |
| Eif3b      | ENSRNOT0000001689 | 14,663,320 | DOWNSTREAM           | C | G | - | - |
| Eif3b      | ENSRNOT0000001689 | 14,677,470 | INTRONIC             | A | T | - | - |
| Eif3b      | ENSRNOT0000001689 | 14,677,570 | INTRONIC             | C | T | - | - |
| Eif3b      | ENSRNOT0000001689 | 14,678,492 | INTRONIC             | G | A | - | - |
| Eif3b      | ENSRNOT0000001689 | 14,679,429 | INTRONIC             | G | T | - | - |
| Eif3b      | ENSRNOT0000001689 | 14,680,451 | INTRONIC             | G | T | - | - |
| Eif3b      | ENSRNOT0000001689 | 14,686,772 | INTRONIC             | G | C | - | - |
| Eif3b      | ENSRNOT0000001689 | 14,686,960 | INTRONIC             | G | A | - | - |
| Eif3b      | ENSRNOT0000001689 | 14,686,962 | INTRONIC             | A | G | - | - |
| Eif3b      | ENSRNOT0000001689 | 14,688,228 | INTRONIC             | A | C | - | - |
| Eif3b      | ENSRNOT0000001689 | 14,689,972 | INTRONIC             | C | A | - | - |
| Eif3b      | ENSRNOT0000001689 | 14,693,528 | UPSTREAM             | A | G | - | - |
| Eif3b      | ENSRNOT0000001689 | 14,693,624 | UPSTREAM             | T | A | - | - |
| Eif3b      | ENSRNOT0000001689 | 14,693,885 | UPSTREAM             | T | C | - | - |
| Eif3b      | ENSRNOT0000001689 | 14,693,887 | UPSTREAM             | A | C | - | - |
| Eif3b      | ENSRNOT0000001689 | 14,693,910 | UPSTREAM             | C | T | - | - |
| Eif3b      | ENSRNOT0000001689 | 14,694,235 | UPSTREAM             | A | T | - | - |
| Eif3b      | ENSRNOT0000001689 | 14,694,390 | UPSTREAM             | T | C | - | - |
| Eif3b      | ENSRNOT0000001689 | 14,695,274 | UPSTREAM             | G | A | - | - |
| Eif3b      | ENSRNOT0000001689 | 14,695,434 | UPSTREAM             | G | A | - | - |
| Eif3b      | ENSRNOT0000001689 | 14,695,480 | UPSTREAM             | G | A | - | - |
| Eif3b      | ENSRNOT0000001689 | 14,695,729 | UPSTREAM             | T | G | - | - |
| Eif3b      | ENSRNOT0000001689 | 14,695,809 | UPSTREAM             | A | G | - | - |
| Eif3b      | ENSRNOT0000001689 | 14,696,765 | UPSTREAM             | G | A | - | - |
| Eif3b      | ENSRNOT0000001689 | 14,696,768 | UPSTREAM             | A | G | - | - |
| Eif3b      | ENSRNOT0000001689 | 14,696,917 | UPSTREAM             | A | T | - | - |
| Eif3b      | ENSRNOT0000001689 | 14,697,021 | UPSTREAM             | A | G | - | - |
| -          | -                 | 14,697,201 | INTERGENIC           | A | G | - | - |
| -          | -                 | 14,697,618 | INTERGENIC           | T | G | - | - |
| -          | -                 | 14,697,706 | INTERGENIC           | C | G | - | - |
| -          | -                 | 14,697,838 | INTERGENIC           | A | C | - | - |
| -          | -                 | 14,698,263 | INTERGENIC           | G | A | - | - |

|   |            |            |   |   |   |   |
|---|------------|------------|---|---|---|---|
| - | 14,698,349 | INTERGENIC | T | A | - | - |
| - | 14,698,442 | INTERGENIC | A | T | - | - |
| - | 14,698,477 | INTERGENIC | T | A | - | - |
| - | 14,698,603 | INTERGENIC | C | G | - | - |
| - | 14,698,707 | INTERGENIC | C | T | - | - |
| - | 14,698,932 | INTERGENIC | T | C | - | - |
| - | 14,698,940 | INTERGENIC | C | T | - | - |
| - | 14,698,960 | INTERGENIC | T | G | - | - |
| - | 14,699,015 | INTERGENIC | G | A | - | - |
| - | 14,699,046 | INTERGENIC | C | T | - | - |
| - | 14,699,121 | INTERGENIC | G | T | - | - |
| - | 14,699,126 | INTERGENIC | C | T | - | - |
| - | 14,699,150 | INTERGENIC | A | G | - | - |
| - | 14,699,246 | INTERGENIC | C | T | - | - |
| - | 14,699,248 | INTERGENIC | C | T | - | - |
| - | 14,699,284 | INTERGENIC | T | C | - | - |
| - | 14,699,400 | INTERGENIC | G | A | - | - |
| - | 14,699,450 | INTERGENIC | T | C | - | - |
| - | 14,699,498 | INTERGENIC | A | G | - | - |
| - | 14,699,517 | INTERGENIC | T | C | - | - |
| - | 14,699,565 | INTERGENIC | A | G | - | - |
| - | 14,699,602 | INTERGENIC | G | A | - | - |
| - | 14,699,618 | INTERGENIC | T | A | - | - |
| - | 14,699,640 | INTERGENIC | C | A | - | - |
| - | 14,699,713 | INTERGENIC | A | T | - | - |
| - | 14,699,720 | INTERGENIC | T | C | - | - |
| - | 14,699,735 | INTERGENIC | T | C | - | - |
| - | 14,699,998 | INTERGENIC | C | T | - | - |
| - | 14,700,051 | INTERGENIC | C | T | - | - |
| - | 14,700,054 | INTERGENIC | G | A | - | - |
| - | 14,700,077 | INTERGENIC | G | A | - | - |
| - | 14,700,156 | INTERGENIC | T | C | - | - |
| - | 14,700,541 | INTERGENIC | A | C | - | - |
| - | 14,700,716 | INTERGENIC | C | T | - | - |
| - | 14,700,859 | INTERGENIC | A | G | - | - |
| - | 14,701,098 | INTERGENIC | T | G | - | - |
| - | 14,701,140 | INTERGENIC | T | C | - | - |
| - | 14,701,369 | INTERGENIC | T | C | - | - |
| - | 14,701,451 | INTERGENIC | C | G | - | - |
| - | 14,701,512 | INTERGENIC | C | G | - | - |
| - | 14,701,516 | INTERGENIC | C | G | - | - |
| - | 14,701,615 | INTERGENIC | T | A | - | - |
| - | 14,701,909 | INTERGENIC | G | A | - | - |
| - | 14,702,030 | INTERGENIC | G | A | - | - |
| - | 14,702,076 | INTERGENIC | T | C | - | - |
| - | 14,702,142 | INTERGENIC | G | A | - | - |
| - | 14,702,579 | INTERGENIC | T | C | - | - |
| - | 14,702,682 | INTERGENIC | A | T | - | - |
| - | 14,702,683 | INTERGENIC | A | T | - | - |
| - | 14,702,894 | INTERGENIC | C | T | - | - |
| - | 14,703,009 | INTERGENIC | T | C | - | - |
| - | 14,703,331 | INTERGENIC | G | A | - | - |
| - | 14,703,352 | INTERGENIC | T | C | - | - |
| - | 14,703,392 | INTERGENIC | A | G | - | - |
| - | 14,703,476 | INTERGENIC | A | G | - | - |
| - | 14,703,588 | INTERGENIC | A | G | - | - |
| - | 14,703,610 | INTERGENIC | A | T | - | - |
| - | 14,703,655 | INTERGENIC | A | G | - | - |
| - | 14,703,728 | INTERGENIC | T | A | - | - |
| - | 14,703,766 | INTERGENIC | G | C | - | - |
| - | 14,704,266 | INTERGENIC | C | T | - | - |
| - | 14,704,741 | INTERGENIC | A | G | - | - |
| - | 14,704,802 | INTERGENIC | G | T | - | - |
| - | 14,705,193 | INTERGENIC | C | T | - | - |
| - | 14,705,198 | INTERGENIC | C | A | - | - |
| - | 14,705,237 | INTERGENIC | T | C | - | - |
| - | 14,705,254 | INTERGENIC | T | C | - | - |
| - | 14,705,546 | INTERGENIC | T | C | - | - |
| - | 14,705,559 | INTERGENIC | C | T | - | - |
| - | 14,705,608 | INTERGENIC | T | C | - | - |
| - | 14,705,686 | INTERGENIC | C | T | - | - |
| - | 14,706,481 | INTERGENIC | C | T | - | - |
| - | 14,706,681 | INTERGENIC | A | G | - | - |
| - | 14,706,967 | INTERGENIC | A | C | - | - |
| - | 14,706,990 | INTERGENIC | C | T | - | - |
| - | 14,707,278 | INTERGENIC | G | A | - | - |
| - | 14,707,731 | INTERGENIC | T | C | - | - |
| - | 14,708,368 | INTERGENIC | G | A | - | - |
| - | 14,709,008 | INTERGENIC | A | T | - | - |
| - | 14,709,954 | INTERGENIC | G | A | - | - |

|      |                    |            |            |   |   |   |   |
|------|--------------------|------------|------------|---|---|---|---|
| -    |                    | 14,710,363 | INTERGENIC | G | A | - | - |
| -    |                    | 14,710,603 | INTERGENIC | T | C | - | - |
| -    |                    | 14,710,650 | INTERGENIC | G | A | - | - |
| -    |                    | 14,710,667 | INTERGENIC | G | C | - | - |
| -    |                    | 14,710,718 | INTERGENIC | G | A | - | - |
| -    |                    | 14,710,912 | INTERGENIC | C | T | - | - |
| -    |                    | 14,711,000 | INTERGENIC | C | T | - | - |
| -    |                    | 14,711,071 | INTERGENIC | A | G | - | - |
| -    |                    | 14,711,091 | INTERGENIC | T | A | - | - |
| -    |                    | 14,711,116 | INTERGENIC | C | T | - | - |
| -    |                    | 14,711,154 | INTERGENIC | C | T | - | - |
| -    |                    | 14,711,293 | INTERGENIC | A | C | - | - |
| -    |                    | 14,713,313 | INTERGENIC | T | C | - | - |
| -    |                    | 14,713,445 | INTERGENIC | A | G | - | - |
| -    |                    | 14,713,562 | INTERGENIC | C | G | - | - |
| -    |                    | 14,713,625 | INTERGENIC | A | G | - | - |
| -    |                    | 14,713,636 | INTERGENIC | C | T | - | - |
| -    |                    | 14,713,655 | INTERGENIC | C | T | - | - |
| -    |                    | 14,713,735 | INTERGENIC | C | T | - | - |
| -    |                    | 14,713,768 | INTERGENIC | G | A | - | - |
| -    |                    | 14,715,171 | INTERGENIC | T | C | - | - |
| -    |                    | 14,715,294 | INTERGENIC | T | C | - | - |
| -    |                    | 14,715,344 | INTERGENIC | G | C | - | - |
| -    |                    | 14,715,345 | INTERGENIC | T | C | - | - |
| -    |                    | 14,715,508 | INTERGENIC | G | A | - | - |
| -    |                    | 14,715,534 | INTERGENIC | G | C | - | - |
| -    |                    | 14,715,915 | INTERGENIC | T | C | - | - |
| -    |                    | 14,716,305 | INTERGENIC | T | C | - | - |
| -    |                    | 14,716,508 | INTERGENIC | C | T | - | - |
| -    |                    | 14,716,764 | INTERGENIC | C | T | - | - |
| -    |                    | 14,716,765 | INTERGENIC | C | T | - | - |
| -    |                    | 14,716,768 | INTERGENIC | G | C | - | - |
| -    |                    | 14,716,885 | INTERGENIC | C | T | - | - |
| -    |                    | 14,716,887 | INTERGENIC | C | T | - | - |
| -    |                    | 14,717,143 | INTERGENIC | G | C | - | - |
| -    |                    | 14,717,242 | INTERGENIC | C | T | - | - |
| -    |                    | 14,717,292 | INTERGENIC | T | C | - | - |
| -    |                    | 14,717,329 | INTERGENIC | A | T | - | - |
| -    |                    | 14,718,831 | INTERGENIC | C | G | - | - |
| -    |                    | 14,718,931 | INTERGENIC | T | C | - | - |
| -    |                    | 14,719,276 | INTERGENIC | A | C | - | - |
| -    |                    | 14,719,608 | INTERGENIC | G | A | - | - |
| -    |                    | 14,719,688 | INTERGENIC | C | T | - | - |
| -    |                    | 14,719,697 | INTERGENIC | G | A | - | - |
| -    |                    | 14,719,706 | INTERGENIC | A | T | - | - |
| -    |                    | 14,719,730 | INTERGENIC | A | G | - | - |
| -    |                    | 14,719,785 | INTERGENIC | T | C | - | - |
| -    |                    | 14,719,798 | INTERGENIC | A | G | - | - |
| -    |                    | 14,719,814 | INTERGENIC | T | C | - | - |
| Snx8 | ENSRNOT00000001696 | 14,720,022 | UPSTREAM   | A | G | - | - |
| Snx8 | ENSRNOT00000001696 | 14,720,613 | UPSTREAM   | A | G | - | - |
| Snx8 | ENSRNOT00000001696 | 14,721,047 | UPSTREAM   | T | C | - | - |
| Snx8 | ENSRNOT00000001696 | 14,721,380 | UPSTREAM   | C | A | - | - |
| Snx8 | ENSRNOT00000001696 | 14,721,457 | UPSTREAM   | G | A | - | - |
| Snx8 | ENSRNOT00000001696 | 14,721,462 | UPSTREAM   | G | A | - | - |
| Snx8 | ENSRNOT00000001696 | 14,721,730 | UPSTREAM   | G | C | - | - |
| Snx8 | ENSRNOT00000001696 | 14,721,878 | UPSTREAM   | C | T | - | - |
| Snx8 | ENSRNOT00000001696 | 14,722,341 | UPSTREAM   | T | G | - | - |
| Snx8 | ENSRNOT00000001696 | 14,722,607 | UPSTREAM   | A | G | - | - |
| Snx8 | ENSRNOT00000001696 | 14,722,706 | UPSTREAM   | A | G | - | - |
| Snx8 | ENSRNOT00000001696 | 14,722,738 | UPSTREAM   | G | T | - | - |
| Snx8 | ENSRNOT00000001696 | 14,722,878 | UPSTREAM   | A | C | - | - |
| Snx8 | ENSRNOT00000001696 | 14,722,880 | UPSTREAM   | G | A | - | - |
| Snx8 | ENSRNOT00000001696 | 14,723,390 | UPSTREAM   | C | T | - | - |
| Snx8 | ENSRNOT00000001696 | 14,723,522 | UPSTREAM   | A | G | - | - |
| Snx8 | ENSRNOT00000001696 | 14,723,857 | UPSTREAM   | G | A | - | - |
| Snx8 | ENSRNOT00000001696 | 14,725,600 | INTRONIC   | A | G | - | - |
| Snx8 | ENSRNOT00000001696 | 14,725,736 | INTRONIC   | T | C | - | - |
| Snx8 | ENSRNOT00000001696 | 14,725,739 | INTRONIC   | G | C | - | - |
| Snx8 | ENSRNOT00000001696 | 14,726,067 | INTRONIC   | G | T | - | - |
| Snx8 | ENSRNOT00000001696 | 14,728,419 | INTRONIC   | T | C | - | - |
| Snx8 | ENSRNOT00000001696 | 14,729,659 | INTRONIC   | G | A | - | - |
| Snx8 | ENSRNOT00000001696 | 14,730,919 | INTRONIC   | A | G | - | - |
| Snx8 | ENSRNOT00000001696 | 14,730,944 | INTRONIC   | C | G | - | - |
| Snx8 | ENSRNOT00000001696 | 14,731,423 | INTRONIC   | A | G | - | - |
| Snx8 | ENSRNOT00000001696 | 14,732,236 | INTRONIC   | C | G | - | - |
| Snx8 | ENSRNOT00000001696 | 14,732,342 | INTRONIC   | T | C | - | - |
| Snx8 | ENSRNOT00000001696 | 14,734,429 | INTRONIC   | G | C | - | - |
| Snx8 | ENSRNOT00000001696 | 14,735,624 | INTRONIC   | A | G | - | - |
| Snx8 | ENSRNOT00000001696 | 14,736,883 | INTRONIC   | C | T | - | - |

|      |                    |            |            |   |   |   |   |
|------|--------------------|------------|------------|---|---|---|---|
| Snx8 | ENSRNOT00000001696 | 14,737,037 | INTRONIC   | A | T | - | - |
| Snx8 | ENSRNOT00000001696 | 14,737,301 | INTRONIC   | G | T | - | - |
| Snx8 | ENSRNOT00000001696 | 14,737,303 | INTRONIC   | T | G | - | - |
| Snx8 | ENSRNOT00000001696 | 14,737,359 | INTRONIC   | C | G | - | - |
| Snx8 | ENSRNOT00000001696 | 14,737,723 | INTRONIC   | G | A | - | - |
| Snx8 | ENSRNOT00000001696 | 14,738,080 | INTRONIC   | C | G | - | - |
| Snx8 | ENSRNOT00000001696 | 14,738,164 | INTRONIC   | G | T | - | - |
| Snx8 | ENSRNOT00000001696 | 14,738,279 | INTRONIC   | T | C | - | - |
| Snx8 | ENSRNOT00000001696 | 14,738,374 | INTRONIC   | A | T | - | - |
| Snx8 | ENSRNOT00000001696 | 14,738,545 | INTRONIC   | C | A | - | - |
| Snx8 | ENSRNOT00000001696 | 14,738,982 | INTRONIC   | T | A | - | - |
| Snx8 | ENSRNOT00000001696 | 14,739,529 | INTRONIC   | G | C | - | - |
| Snx8 | ENSRNOT00000001696 | 14,741,676 | INTRONIC   | G | T | - | - |
| Snx8 | ENSRNOT00000001696 | 14,743,228 | INTRONIC   | T | C | - | - |
| Snx8 | ENSRNOT00000001696 | 14,743,684 | INTRONIC   | G | T | - | - |
| Snx8 | ENSRNOT00000001696 | 14,744,223 | INTRONIC   | G | T | - | - |
| Snx8 | ENSRNOT00000001696 | 14,744,761 | INTRONIC   | C | T | - | - |
| Snx8 | ENSRNOT00000001696 | 14,744,977 | INTRONIC   | T | C | - | - |
| Snx8 | ENSRNOT00000001696 | 14,745,005 | INTRONIC   | G | A | - | - |
| Snx8 | ENSRNOT00000001696 | 14,745,501 | INTRONIC   | T | G | - | - |
| Snx8 | ENSRNOT00000001696 | 14,745,526 | INTRONIC   | T | C | - | - |
| Snx8 | ENSRNOT00000001696 | 14,746,221 | INTRONIC   | G | A | - | - |
| Snx8 | ENSRNOT00000001696 | 14,747,649 | INTRONIC   | T | C | - | - |
| Snx8 | ENSRNOT00000001696 | 14,748,125 | INTRONIC   | T | A | - | - |
| Snx8 | ENSRNOT00000001696 | 14,749,867 | INTRONIC   | G | A | - | - |
| Snx8 | ENSRNOT00000001696 | 14,750,182 | INTRONIC   | T | C | - | - |
| Snx8 | ENSRNOT00000001696 | 14,751,097 | INTRONIC   | T | G | - | - |
| Snx8 | ENSRNOT00000001696 | 14,752,248 | INTRONIC   | C | T | - | - |
| Snx8 | ENSRNOT00000001696 | 14,753,139 | INTRONIC   | T | A | - | - |
| Snx8 | ENSRNOT00000001696 | 14,753,445 | INTRONIC   | A | T | - | - |
| Snx8 | ENSRNOT00000001696 | 14,754,007 | INTRONIC   | G | A | - | - |
| Snx8 | ENSRNOT00000001696 | 14,754,196 | INTRONIC   | G | T | - | - |
| Snx8 | ENSRNOT00000001696 | 14,756,249 | INTRONIC   | C | G | - | - |
| Snx8 | ENSRNOT00000001696 | 14,757,316 | INTRONIC   | C | T | - | - |
| Snx8 | ENSRNOT00000001696 | 14,758,106 | INTRONIC   | G | A | - | - |
| Snx8 | ENSRNOT00000001696 | 14,758,141 | INTRONIC   | T | C | - | - |
| Snx8 | ENSRNOT00000001696 | 14,759,912 | INTRONIC   | G | A | - | - |
| Snx8 | ENSRNOT00000001696 | 14,759,953 | INTRONIC   | T | C | - | - |
| Snx8 | ENSRNOT00000001696 | 14,759,978 | INTRONIC   | T | C | - | - |
| Snx8 | ENSRNOT00000001696 | 14,760,851 | INTRONIC   | T | C | - | - |
| Snx8 | ENSRNOT00000001696 | 14,760,917 | INTRONIC   | A | G | - | - |
| Snx8 | ENSRNOT00000001696 | 14,761,221 | INTRONIC   | C | T | - | - |
| Snx8 | ENSRNOT00000001696 | 14,761,970 | INTRONIC   | T | C | - | - |
| Snx8 | ENSRNOT00000001696 | 14,762,170 | INTRONIC   | C | T | - | - |
| Snx8 | ENSRNOT00000001696 | 14,762,181 | INTRONIC   | G | T | - | - |
| Snx8 | ENSRNOT00000001696 | 14,762,184 | INTRONIC   | C | A | - | - |
| Snx8 | ENSRNOT00000001696 | 14,762,217 | INTRONIC   | G | T | - | - |
| Snx8 | ENSRNOT00000001696 | 14,762,220 | INTRONIC   | C | A | - | - |
| Snx8 | ENSRNOT00000001696 | 14,762,431 | INTRONIC   | C | T | - | - |
| Snx8 | ENSRNOT00000001696 | 14,762,453 | INTRONIC   | C | T | - | - |
| Snx8 | ENSRNOT00000001696 | 14,762,469 | INTRONIC   | G | T | - | - |
| Snx8 | ENSRNOT00000001696 | 14,762,505 | INTRONIC   | G | T | - | - |
| Snx8 | ENSRNOT00000001696 | 14,762,983 | INTRONIC   | G | A | - | - |
| Snx8 | ENSRNOT00000001696 | 14,763,284 | INTRONIC   | C | A | - | - |
| Snx8 | ENSRNOT00000001696 | 14,764,679 | INTRONIC   | C | T | - | - |
| Snx8 | ENSRNOT00000001696 | 14,764,890 | INTRONIC   | T | C | - | - |
| Snx8 | ENSRNOT00000001696 | 14,765,503 | INTRONIC   | C | T | - | - |
| Snx8 | ENSRNOT00000001696 | 14,765,529 | INTRONIC   | C | T | - | - |
| Snx8 | ENSRNOT00000001696 | 14,765,530 | INTRONIC   | C | T | - | - |
| Snx8 | ENSRNOT00000001696 | 14,765,861 | INTRONIC   | T | G | - | - |
| Snx8 | ENSRNOT00000001696 | 14,766,210 | INTRONIC   | G | A | - | - |
| Snx8 | ENSRNOT00000001696 | 14,766,516 | INTRONIC   | C | A | - | - |
| Snx8 | ENSRNOT00000001696 | 14,766,849 | INTRONIC   | G | A | - | - |
| Snx8 | ENSRNOT00000001696 | 14,767,456 | INTRONIC   | T | C | - | - |
| Snx8 | ENSRNOT00000001696 | 14,767,508 | INTRONIC   | C | T | - | - |
| Snx8 | ENSRNOT00000001696 | 14,767,720 | INTRONIC   | C | T | - | - |
| Snx8 | ENSRNOT00000001696 | 14,768,937 | INTRONIC   | C | T | - | - |
| Snx8 | ENSRNOT00000001696 | 14,768,981 | INTRONIC   | C | T | - | - |
| Snx8 | ENSRNOT00000001696 | 14,769,700 | INTRONIC   | T | G | - | - |
| Snx8 | ENSRNOT00000001696 | 14,770,152 | INTRONIC   | C | T | - | - |
| Snx8 | ENSRNOT00000001696 | 14,770,622 | INTRONIC   | C | T | - | - |
| Snx8 | ENSRNOT00000001696 | 14,771,157 | INTRONIC   | T | C | - | - |
| Snx8 | ENSRNOT00000001696 | 14,771,510 | INTRONIC   | C | T | - | - |
| Snx8 | ENSRNOT00000001696 | 14,771,694 | INTRONIC   | A | G | - | - |
| Snx8 | ENSRNOT00000001696 | 14,771,760 | INTRONIC   | G | A | - | - |
| Snx8 | ENSRNOT00000001696 | 14,772,709 | 3PRIME_UTR | G | C | - | - |
| Snx8 | ENSRNOT00000001696 | 14,772,773 | 3PRIME_UTR | C | T | - | - |
| Snx8 | ENSRNOT00000001696 | 14,773,680 | DOWNSTREAM | A | G | - | - |
| Snx8 | ENSRNOT00000001696 | 14,774,854 | DOWNSTREAM | G | A | - | - |
| Snx8 | ENSRNOT00000001696 | 14,774,954 | DOWNSTREAM | A | C | - | - |

|        |                    |            |            |   |   |   |   |
|--------|--------------------|------------|------------|---|---|---|---|
| Snx8   | ENSRNOT00000001696 | 14,775,013 | DOWNSTREAM | A | G | - | - |
| Snx8   | ENSRNOT00000001696 | 14,775,072 | DOWNSTREAM | A | G | - | - |
| Snx8   | ENSRNOT00000001696 | 14,775,422 | DOWNSTREAM | G | T | - | - |
| Snx8   | ENSRNOT00000001696 | 14,776,556 | DOWNSTREAM | T | C | - | - |
| Snx8   | ENSRNOT00000001696 | 14,777,238 | DOWNSTREAM | G | T | - | - |
| Snx8   | ENSRNOT00000001696 | 14,777,328 | DOWNSTREAM | T | A | - | - |
| Snx8   | ENSRNOT00000001696 | 14,777,351 | DOWNSTREAM | C | T | - | - |
| Snx8   | ENSRNOT00000001696 | 14,777,387 | DOWNSTREAM | T | C | - | - |
| Snx8   | ENSRNOT00000001696 | 14,777,534 | DOWNSTREAM | A | G | - | - |
| Snx8   | ENSRNOT00000001696 | 14,777,691 | DOWNSTREAM | T | C | - | - |
| Snx8   | ENSRNOT00000001696 | 14,777,906 | DOWNSTREAM | C | T | - | - |
| Snx8   | ENSRNOT00000001696 | 14,778,167 | DOWNSTREAM | T | C | - | - |
| Snx8   | ENSRNOT00000001696 | 14,778,311 | DOWNSTREAM | T | C | - | - |
| Snx8   | ENSRNOT00000001696 | 14,778,339 | DOWNSTREAM | A | G | - | - |
| Nudt1  | ENSRNOT00000001700 | 14,779,705 | UPSTREAM   | A | T | - | - |
| Nudt1  | ENSRNOT00000001700 | 14,779,979 | UPSTREAM   | A | T | - | - |
| Nudt1  | ENSRNOT00000001700 | 14,780,158 | UPSTREAM   | A | G | - | - |
| Nudt1  | ENSRNOT00000001700 | 14,780,230 | UPSTREAM   | T | C | - | - |
| Nudt1  | ENSRNOT00000001700 | 14,781,093 | UPSTREAM   | T | C | - | - |
| Nudt1  | ENSRNOT00000001700 | 14,781,369 | UPSTREAM   | T | G | - | - |
| Nudt1  | ENSRNOT00000001700 | 14,781,395 | UPSTREAM   | A | G | - | - |
| Nudt1  | ENSRNOT00000001700 | 14,781,439 | UPSTREAM   | T | C | - | - |
| Nudt1  | ENSRNOT00000001700 | 14,781,935 | UPSTREAM   | A | G | - | - |
| Nudt1  | ENSRNOT00000001700 | 14,782,082 | UPSTREAM   | G | A | - | - |
| Nudt1  | ENSRNOT00000001700 | 14,782,115 | UPSTREAM   | A | G | - | - |
| Ftsj2  | ENSRNOT00000042366 | 14,786,833 | 3PRIME_UTR | T | A | - | - |
| Ftsj2  | ENSRNOT00000042366 | 14,788,177 | DOWNSTREAM | C | A | - | - |
| Ftsj2  | ENSRNOT00000042366 | 14,788,853 | DOWNSTREAM | A | T | - | - |
| Mad1l1 | ENSRNOT00000001709 | 14,789,842 | UPSTREAM   | C | T | - | - |
| Mad1l1 | ENSRNOT00000001709 | 14,790,363 | UPSTREAM   | C | A | - | - |
| Mad1l1 | ENSRNOT00000001709 | 14,790,469 | UPSTREAM   | C | T | - | - |
| Mad1l1 | ENSRNOT00000001709 | 14,790,503 | UPSTREAM   | C | A | - | - |
| Mad1l1 | ENSRNOT00000001709 | 14,791,174 | UPSTREAM   | A | C | - | - |
| Mad1l1 | ENSRNOT00000001709 | 14,791,430 | UPSTREAM   | T | C | - | - |
| Mad1l1 | ENSRNOT00000001709 | 14,794,596 | INTRONIC   | A | G | - | - |
| Mad1l1 | ENSRNOT00000001709 | 14,794,815 | INTRONIC   | C | T | - | - |
| Mad1l1 | ENSRNOT00000001709 | 14,795,192 | INTRONIC   | A | C | - | - |
| Mad1l1 | ENSRNOT00000001709 | 14,795,334 | INTRONIC   | T | C | - | - |
| Mad1l1 | ENSRNOT00000001709 | 14,796,039 | INTRONIC   | A | G | - | - |
| Mad1l1 | ENSRNOT00000001709 | 14,796,808 | INTRONIC   | C | T | - | - |
| Mad1l1 | ENSRNOT00000001709 | 14,796,847 | INTRONIC   | T | C | - | - |
| Mad1l1 | ENSRNOT00000001709 | 14,797,018 | INTRONIC   | G | A | - | - |
| Mad1l1 | ENSRNOT00000001709 | 14,797,485 | INTRONIC   | G | A | - | - |
| Mad1l1 | ENSRNOT00000001709 | 14,797,579 | INTRONIC   | C | T | - | - |
| Mad1l1 | ENSRNOT00000001709 | 14,798,031 | INTRONIC   | T | C | - | - |
| Mad1l1 | ENSRNOT00000001709 | 14,798,295 | INTRONIC   | C | T | - | - |
| Mad1l1 | ENSRNOT00000001709 | 14,799,677 | INTRONIC   | C | T | - | - |
| Mad1l1 | ENSRNOT00000001709 | 14,800,551 | INTRONIC   | A | G | - | - |
| Mad1l1 | ENSRNOT00000001709 | 14,802,073 | INTRONIC   | C | T | - | - |
| Mad1l1 | ENSRNOT00000001709 | 14,802,131 | INTRONIC   | T | C | - | - |
| Mad1l1 | ENSRNOT00000001709 | 14,802,159 | INTRONIC   | T | C | - | - |
| Mad1l1 | ENSRNOT00000001709 | 14,802,184 | INTRONIC   | G | A | - | - |
| Mad1l1 | ENSRNOT00000001709 | 14,802,225 | INTRONIC   | T | C | - | - |
| Mad1l1 | ENSRNOT00000001709 | 14,802,386 | INTRONIC   | A | G | - | - |
| Mad1l1 | ENSRNOT00000001709 | 14,803,519 | INTRONIC   | T | G | - | - |
| Mad1l1 | ENSRNOT00000001709 | 14,803,603 | INTRONIC   | C | G | - | - |
| Mad1l1 | ENSRNOT00000001709 | 14,803,607 | INTRONIC   | T | C | - | - |
| Mad1l1 | ENSRNOT00000001709 | 14,806,849 | INTRONIC   | C | A | - | - |
| Mad1l1 | ENSRNOT00000001709 | 14,806,897 | INTRONIC   | T | C | - | - |
| Mad1l1 | ENSRNOT00000001709 | 14,810,241 | INTRONIC   | T | C | - | - |
| Mad1l1 | ENSRNOT00000001709 | 14,811,032 | INTRONIC   | A | G | - | - |
| Mad1l1 | ENSRNOT00000001709 | 14,811,536 | INTRONIC   | T | C | - | - |
| Mad1l1 | ENSRNOT00000001709 | 14,811,645 | INTRONIC   | T | C | - | - |
| Mad1l1 | ENSRNOT00000001709 | 14,811,802 | INTRONIC   | A | T | - | - |
| Mad1l1 | ENSRNOT00000001709 | 14,812,369 | INTRONIC   | A | T | - | - |
| Mad1l1 | ENSRNOT00000001709 | 14,812,453 | INTRONIC   | C | G | - | - |
| Mad1l1 | ENSRNOT00000001709 | 14,813,149 | INTRONIC   | T | C | - | - |
| Mad1l1 | ENSRNOT00000001709 | 14,813,329 | INTRONIC   | C | G | - | - |
| Mad1l1 | ENSRNOT00000001709 | 14,813,842 | INTRONIC   | C | T | - | - |
| Mad1l1 | ENSRNOT00000001709 | 14,814,241 | INTRONIC   | C | T | - | - |
| Mad1l1 | ENSRNOT00000001709 | 14,814,551 | INTRONIC   | T | G | - | - |
| Mad1l1 | ENSRNOT00000001709 | 14,814,567 | INTRONIC   | C | T | - | - |
| Mad1l1 | ENSRNOT00000001709 | 14,816,189 | INTRONIC   | C | T | - | - |
| Mad1l1 | ENSRNOT00000001709 | 14,816,201 | INTRONIC   | C | G | - | - |
| Mad1l1 | ENSRNOT00000001709 | 14,816,284 | INTRONIC   | T | G | - | - |
| Mad1l1 | ENSRNOT00000001709 | 14,816,401 | INTRONIC   | A | G | - | - |
| Mad1l1 | ENSRNOT00000001709 | 14,817,152 | INTRONIC   | T | C | - | - |
| Mad1l1 | ENSRNOT00000001709 | 14,817,284 | INTRONIC   | T | A | - | - |
| Mad1l1 | ENSRNOT00000001709 | 14,817,608 | INTRONIC   | C | G | - | - |
| Mad1l1 | ENSRNOT00000001709 | 14,818,585 | INTRONIC   | T | A | - | - |

|        |                    |            |                   |   |   |   |   |
|--------|--------------------|------------|-------------------|---|---|---|---|
| Mad111 | ENSRNOT00000001709 | 14,818,601 | INTRONIC          | T | G | - | - |
| Mad111 | ENSRNOT00000001709 | 14,819,156 | SYNONYMOUS_CODING | T | C | - | - |
| Mad111 | ENSRNOT00000001709 | 14,821,891 | INTRONIC          | A | C | - | - |
| Mad111 | ENSRNOT00000001709 | 14,821,918 | INTRONIC          | T | A | - | - |
| Mad111 | ENSRNOT00000001709 | 14,821,925 | INTRONIC          | G | T | - | - |
| Mad111 | ENSRNOT00000001709 | 14,821,926 | INTRONIC          | T | G | - | - |
| Mad111 | ENSRNOT00000001709 | 14,823,444 | INTRONIC          | G | A | - | - |
| Mad111 | ENSRNOT00000001709 | 14,823,705 | INTRONIC          | T | C | - | - |
| Mad111 | ENSRNOT00000001709 | 14,824,271 | INTRONIC          | G | A | - | - |
| Mad111 | ENSRNOT00000001709 | 14,824,399 | INTRONIC          | G | A | - | - |
| Mad111 | ENSRNOT00000001709 | 14,825,739 | INTRONIC          | T | G | - | - |
| Mad111 | ENSRNOT00000001709 | 14,825,883 | INTRONIC          | G | A | - | - |
| Mad111 | ENSRNOT00000001709 | 14,826,374 | INTRONIC          | G | T | - | - |
| Mad111 | ENSRNOT00000001709 | 14,826,384 | INTRONIC          | T | C | - | - |
| Mad111 | ENSRNOT00000001709 | 14,826,693 | INTRONIC          | G | T | - | - |
| Mad111 | ENSRNOT00000001709 | 14,826,767 | INTRONIC          | C | A | - | - |
| Mad111 | ENSRNOT00000001709 | 14,827,266 | INTRONIC          | C | G | - | - |
| Mad111 | ENSRNOT00000001709 | 14,827,288 | INTRONIC          | A | G | - | - |
| Mad111 | ENSRNOT00000001709 | 14,827,340 | INTRONIC          | G | C | - | - |
| Mad111 | ENSRNOT00000001709 | 14,827,411 | INTRONIC          | T | G | - | - |
| Mad111 | ENSRNOT00000001709 | 14,827,426 | INTRONIC          | A | G | - | - |
| Mad111 | ENSRNOT00000001709 | 14,827,434 | INTRONIC          | T | C | - | - |
| Mad111 | ENSRNOT00000001709 | 14,827,488 | INTRONIC          | A | G | - | - |
| Mad111 | ENSRNOT00000001709 | 14,827,496 | INTRONIC          | G | C | - | - |
| Mad111 | ENSRNOT00000001709 | 14,827,555 | INTRONIC          | G | C | - | - |
| Mad111 | ENSRNOT00000001709 | 14,827,556 | INTRONIC          | A | G | - | - |
| Mad111 | ENSRNOT00000001709 | 14,827,565 | INTRONIC          | G | A | - | - |
| Mad111 | ENSRNOT00000001709 | 14,827,682 | INTRONIC          | T | C | - | - |
| Mad111 | ENSRNOT00000001709 | 14,827,690 | INTRONIC          | T | C | - | - |
| Mad111 | ENSRNOT00000001709 | 14,827,710 | INTRONIC          | T | A | - | - |
| Mad111 | ENSRNOT00000001709 | 14,827,832 | INTRONIC          | A | G | - | - |
| Mad111 | ENSRNOT00000001709 | 14,828,703 | INTRONIC          | T | C | - | - |
| Mad111 | ENSRNOT00000001709 | 14,830,383 | INTRONIC          | C | A | - | - |
| Mad111 | ENSRNOT00000001709 | 14,830,465 | INTRONIC          | G | A | - | - |
| Mad111 | ENSRNOT00000001709 | 14,831,009 | INTRONIC          | T | C | - | - |
| Mad111 | ENSRNOT00000001709 | 14,831,417 | INTRONIC          | G | A | - | - |
| Mad111 | ENSRNOT00000001709 | 14,832,285 | INTRONIC          | A | G | - | - |
| Mad111 | ENSRNOT00000001709 | 14,832,900 | INTRONIC          | T | C | - | - |
| Mad111 | ENSRNOT00000001709 | 14,832,949 | INTRONIC          | C | A | - | - |
| Mad111 | ENSRNOT00000001709 | 14,833,113 | INTRONIC          | C | T | - | - |
| Mad111 | ENSRNOT00000001709 | 14,833,162 | INTRONIC          | C | A | - | - |
| Mad111 | ENSRNOT00000001709 | 14,833,705 | INTRONIC          | G | A | - | - |
| Mad111 | ENSRNOT00000001709 | 14,834,179 | INTRONIC          | T | C | - | - |
| Mad111 | ENSRNOT00000001709 | 14,834,271 | INTRONIC          | A | G | - | - |
| Mad111 | ENSRNOT00000001709 | 14,835,086 | INTRONIC          | C | T | - | - |
| Mad111 | ENSRNOT00000001709 | 14,837,145 | INTRONIC          | T | C | - | - |
| Mad111 | ENSRNOT00000001709 | 14,837,147 | INTRONIC          | C | A | - | - |
| Mad111 | ENSRNOT00000001709 | 14,837,627 | INTRONIC          | A | G | - | - |
| Mad111 | ENSRNOT00000001709 | 14,837,905 | INTRONIC          | G | T | - | - |
| Mad111 | ENSRNOT00000001709 | 14,838,210 | INTRONIC          | T | C | - | - |
| Mad111 | ENSRNOT00000001709 | 14,838,241 | INTRONIC          | T | C | - | - |
| Mad111 | ENSRNOT00000001709 | 14,839,544 | INTRONIC          | G | C | - | - |
| Mad111 | ENSRNOT00000001709 | 14,839,944 | INTRONIC          | A | G | - | - |
| Mad111 | ENSRNOT00000001709 | 14,842,411 | INTRONIC          | T | C | - | - |
| Mad111 | ENSRNOT00000001709 | 14,842,514 | INTRONIC          | G | A | - | - |
| Mad111 | ENSRNOT00000001709 | 14,842,775 | INTRONIC          | T | C | - | - |
| Mad111 | ENSRNOT00000001709 | 14,843,054 | INTRONIC          | C | T | - | - |
| Mad111 | ENSRNOT00000001709 | 14,843,179 | INTRONIC          | G | A | - | - |
| Mad111 | ENSRNOT00000001709 | 14,843,719 | INTRONIC          | A | C | - | - |
| Mad111 | ENSRNOT00000001709 | 14,844,168 | INTRONIC          | A | T | - | - |
| Mad111 | ENSRNOT00000001709 | 14,844,169 | INTRONIC          | A | C | - | - |
| Mad111 | ENSRNOT00000001709 | 14,844,294 | INTRONIC          | C | T | - | - |
| Mad111 | ENSRNOT00000001709 | 14,844,306 | INTRONIC          | C | T | - | - |
| Mad111 | ENSRNOT00000001709 | 14,844,777 | INTRONIC          | A | G | - | - |
| Mad111 | ENSRNOT00000001709 | 14,845,430 | INTRONIC          | G | C | - | - |
| Mad111 | ENSRNOT00000001709 | 14,845,614 | INTRONIC          | T | C | - | - |
| Mad111 | ENSRNOT00000001709 | 14,845,626 | INTRONIC          | T | A | - | - |
| Mad111 | ENSRNOT00000001709 | 14,848,049 | INTRONIC          | C | A | - | - |
| Mad111 | ENSRNOT00000001709 | 14,848,861 | INTRONIC          | C | T | - | - |
| Mad111 | ENSRNOT00000001709 | 14,848,931 | INTRONIC          | T | C | - | - |
| Mad111 | ENSRNOT00000001709 | 14,849,289 | INTRONIC          | C | T | - | - |
| Mad111 | ENSRNOT00000001709 | 14,849,851 | INTRONIC          | C | T | - | - |
| Mad111 | ENSRNOT00000001709 | 14,849,862 | INTRONIC          | T | A | - | - |
| Mad111 | ENSRNOT00000001709 | 14,850,670 | INTRONIC          | T | C | - | - |
| Mad111 | ENSRNOT00000001709 | 14,850,770 | INTRONIC          | C | T | - | - |
| Mad111 | ENSRNOT00000001709 | 14,851,329 | INTRONIC          | A | T | - | - |
| Mad111 | ENSRNOT00000001709 | 14,852,416 | INTRONIC          | C | A | - | - |
| Mad111 | ENSRNOT00000001709 | 14,853,072 | INTRONIC          | G | T | - | - |
| Mad111 | ENSRNOT00000001709 | 14,853,870 | INTRONIC          | T | C | - | - |
| Mad111 | ENSRNOT00000001709 | 14,855,179 | INTRONIC          | C | T | - | - |

|        |                    |            |          |   |   |   |   |
|--------|--------------------|------------|----------|---|---|---|---|
| Mad111 | ENSRNOT00000001709 | 14,856,026 | INTRONIC | C | T | - | - |
| Mad111 | ENSRNOT00000001709 | 14,856,061 | INTRONIC | A | G | - | - |
| Mad111 | ENSRNOT00000001709 | 14,856,195 | INTRONIC | A | G | - | - |
| Mad111 | ENSRNOT00000001709 | 14,856,239 | INTRONIC | G | A | - | - |
| Mad111 | ENSRNOT00000001709 | 14,856,302 | INTRONIC | G | A | - | - |
| Mad111 | ENSRNOT00000001709 | 14,856,325 | INTRONIC | C | G | - | - |
| Mad111 | ENSRNOT00000001709 | 14,856,352 | INTRONIC | T | C | - | - |
| Mad111 | ENSRNOT00000001709 | 14,856,374 | INTRONIC | A | C | - | - |
| Mad111 | ENSRNOT00000001709 | 14,856,421 | INTRONIC | T | G | - | - |
| Mad111 | ENSRNOT00000001709 | 14,856,667 | INTRONIC | G | A | - | - |
| Mad111 | ENSRNOT00000001709 | 14,856,718 | INTRONIC | C | G | - | - |
| Mad111 | ENSRNOT00000001709 | 14,856,766 | INTRONIC | C | T | - | - |
| Mad111 | ENSRNOT00000001709 | 14,857,154 | INTRONIC | T | C | - | - |
| Mad111 | ENSRNOT00000001709 | 14,857,369 | INTRONIC | A | G | - | - |
| Mad111 | ENSRNOT00000001709 | 14,857,517 | INTRONIC | C | T | - | - |
| Mad111 | ENSRNOT00000001709 | 14,857,575 | INTRONIC | C | T | - | - |
| Mad111 | ENSRNOT00000001709 | 14,857,958 | INTRONIC | G | A | - | - |
| Mad111 | ENSRNOT00000001709 | 14,858,003 | INTRONIC | C | G | - | - |
| Mad111 | ENSRNOT00000001709 | 14,858,087 | INTRONIC | G | A | - | - |
| Mad111 | ENSRNOT00000001709 | 14,858,094 | INTRONIC | G | C | - | - |
| Mad111 | ENSRNOT00000001709 | 14,858,565 | INTRONIC | G | A | - | - |
| Mad111 | ENSRNOT00000001709 | 14,859,254 | INTRONIC | G | A | - | - |
| Mad111 | ENSRNOT00000001709 | 14,859,520 | INTRONIC | T | G | - | - |
| Mad111 | ENSRNOT00000001709 | 14,859,753 | INTRONIC | A | C | - | - |
| Mad111 | ENSRNOT00000001709 | 14,860,016 | INTRONIC | C | T | - | - |
| Mad111 | ENSRNOT00000001709 | 14,860,318 | INTRONIC | T | C | - | - |
| Mad111 | ENSRNOT00000001709 | 14,861,045 | INTRONIC | G | A | - | - |
| Mad111 | ENSRNOT00000001709 | 14,861,167 | INTRONIC | T | A | - | - |
| Mad111 | ENSRNOT00000001709 | 14,861,466 | INTRONIC | A | G | - | - |
| Mad111 | ENSRNOT00000001709 | 14,862,008 | INTRONIC | G | A | - | - |
| Mad111 | ENSRNOT00000001709 | 14,862,449 | INTRONIC | A | G | - | - |
| Mad111 | ENSRNOT00000001709 | 14,862,533 | INTRONIC | T | C | - | - |
| Mad111 | ENSRNOT00000001709 | 14,862,625 | INTRONIC | T | C | - | - |
| Mad111 | ENSRNOT00000001709 | 14,862,949 | INTRONIC | A | G | - | - |
| Mad111 | ENSRNOT00000001709 | 14,863,301 | INTRONIC | G | A | - | - |
| Mad111 | ENSRNOT00000001709 | 14,863,327 | INTRONIC | C | G | - | - |
| Mad111 | ENSRNOT00000001709 | 14,863,799 | INTRONIC | T | A | - | - |
| Mad111 | ENSRNOT00000001709 | 14,863,801 | INTRONIC | T | A | - | - |
| Mad111 | ENSRNOT00000001709 | 14,864,259 | INTRONIC | G | C | - | - |
| Mad111 | ENSRNOT00000001709 | 14,865,163 | INTRONIC | C | G | - | - |
| Mad111 | ENSRNOT00000001709 | 14,865,335 | INTRONIC | C | A | - | - |
| Mad111 | ENSRNOT00000001709 | 14,866,179 | INTRONIC | T | C | - | - |
| Mad111 | ENSRNOT00000001709 | 14,866,781 | INTRONIC | A | G | - | - |
| Mad111 | ENSRNOT00000001709 | 14,869,477 | INTRONIC | T | C | - | - |
| Mad111 | ENSRNOT00000001709 | 14,870,774 | INTRONIC | C | T | - | - |
| Mad111 | ENSRNOT00000001709 | 14,871,001 | INTRONIC | T | C | - | - |
| Mad111 | ENSRNOT00000001709 | 14,872,030 | INTRONIC | T | A | - | - |
| Mad111 | ENSRNOT00000001709 | 14,872,696 | INTRONIC | A | G | - | - |
| Mad111 | ENSRNOT00000001709 | 14,875,203 | INTRONIC | A | T | - | - |
| Mad111 | ENSRNOT00000001709 | 14,875,494 | INTRONIC | T | C | - | - |
| Mad111 | ENSRNOT00000001709 | 14,875,812 | INTRONIC | T | C | - | - |
| Mad111 | ENSRNOT00000001709 | 14,876,430 | INTRONIC | G | A | - | - |
| Mad111 | ENSRNOT00000001709 | 14,876,551 | INTRONIC | T | G | - | - |
| Mad111 | ENSRNOT00000001709 | 14,876,871 | INTRONIC | T | C | - | - |
| Mad111 | ENSRNOT00000001709 | 14,877,602 | INTRONIC | A | G | - | - |
| Mad111 | ENSRNOT00000001709 | 14,877,793 | INTRONIC | G | A | - | - |
| Mad111 | ENSRNOT00000001709 | 14,877,846 | INTRONIC | G | A | - | - |
| Mad111 | ENSRNOT00000001709 | 14,878,220 | INTRONIC | T | C | - | - |
| Mad111 | ENSRNOT00000001709 | 14,878,839 | INTRONIC | C | T | - | - |
| Mad111 | ENSRNOT00000001709 | 14,879,052 | INTRONIC | C | T | - | - |
| Mad111 | ENSRNOT00000001709 | 14,879,604 | INTRONIC | T | G | - | - |
| Mad111 | ENSRNOT00000001709 | 14,879,620 | INTRONIC | C | A | - | - |
| Mad111 | ENSRNOT00000001709 | 14,880,871 | INTRONIC | T | C | - | - |
| Mad111 | ENSRNOT00000001709 | 14,880,924 | INTRONIC | G | A | - | - |
| Mad111 | ENSRNOT00000001709 | 14,881,291 | INTRONIC | A | G | - | - |
| Mad111 | ENSRNOT00000001709 | 14,882,421 | INTRONIC | C | T | - | - |
| Mad111 | ENSRNOT00000001709 | 14,883,835 | INTRONIC | C | T | - | - |
| Mad111 | ENSRNOT00000001709 | 14,883,940 | INTRONIC | C | T | - | - |
| Mad111 | ENSRNOT00000001709 | 14,884,381 | INTRONIC | A | T | - | - |
| Mad111 | ENSRNOT00000001709 | 14,884,427 | INTRONIC | A | C | - | - |
| Mad111 | ENSRNOT00000001709 | 14,885,793 | INTRONIC | T | G | - | - |
| Mad111 | ENSRNOT00000001709 | 14,886,941 | INTRONIC | C | T | - | - |
| Mad111 | ENSRNOT00000001709 | 14,886,942 | INTRONIC | A | T | - | - |
| Mad111 | ENSRNOT00000001709 | 14,887,081 | INTRONIC | C | T | - | - |
| Mad111 | ENSRNOT00000001709 | 14,887,216 | INTRONIC | A | C | - | - |
| Mad111 | ENSRNOT00000001709 | 14,887,225 | INTRONIC | C | T | - | - |
| Mad111 | ENSRNOT00000001709 | 14,887,882 | INTRONIC | T | C | - | - |
| Mad111 | ENSRNOT00000001709 | 14,888,690 | INTRONIC | T | C | - | - |
| Mad111 | ENSRNOT00000001709 | 14,889,728 | INTRONIC | G | A | - | - |
| Mad111 | ENSRNOT00000001709 | 14,893,239 | INTRONIC | A | G | - | - |

|        |                    |            |          |   |   |   |   |
|--------|--------------------|------------|----------|---|---|---|---|
| Mad111 | ENSRNOT00000001709 | 14,893,485 | INTRONIC | G | A | - | - |
| Mad111 | ENSRNOT00000001709 | 14,893,656 | INTRONIC | T | C | - | - |
| Mad111 | ENSRNOT00000001709 | 14,894,591 | INTRONIC | C | T | - | - |
| Mad111 | ENSRNOT00000001709 | 14,894,952 | INTRONIC | C | T | - | - |
| Mad111 | ENSRNOT00000001709 | 14,895,705 | INTRONIC | A | G | - | - |
| Mad111 | ENSRNOT00000001709 | 14,898,370 | INTRONIC | G | A | - | - |
| Mad111 | ENSRNOT00000001709 | 14,899,392 | INTRONIC | T | A | - | - |
| Mad111 | ENSRNOT00000001709 | 14,900,977 | INTRONIC | T | C | - | - |
| Mad111 | ENSRNOT00000001709 | 14,901,042 | INTRONIC | G | A | - | - |
| Mad111 | ENSRNOT00000001709 | 14,901,933 | INTRONIC | T | C | - | - |
| Mad111 | ENSRNOT00000001709 | 14,902,429 | INTRONIC | C | A | - | - |
| Mad111 | ENSRNOT00000001709 | 14,903,090 | INTRONIC | T | G | - | - |
| Mad111 | ENSRNOT00000001709 | 14,903,862 | INTRONIC | C | T | - | - |
| Mad111 | ENSRNOT00000001709 | 14,903,913 | INTRONIC | C | T | - | - |
| Mad111 | ENSRNOT00000001709 | 14,906,447 | INTRONIC | C | T | - | - |
| Mad111 | ENSRNOT00000001709 | 14,907,213 | INTRONIC | G | A | - | - |
| Mad111 | ENSRNOT00000001709 | 14,907,921 | INTRONIC | T | C | - | - |
| Mad111 | ENSRNOT00000001709 | 14,907,923 | INTRONIC | T | C | - | - |
| Mad111 | ENSRNOT00000001709 | 14,908,427 | INTRONIC | A | G | - | - |
| Mad111 | ENSRNOT00000001709 | 14,908,520 | INTRONIC | C | G | - | - |
| Mad111 | ENSRNOT00000001709 | 14,910,962 | INTRONIC | C | T | - | - |
| Mad111 | ENSRNOT00000001709 | 14,911,530 | INTRONIC | C | T | - | - |
| Mad111 | ENSRNOT00000001709 | 14,913,331 | INTRONIC | C | T | - | - |
| Mad111 | ENSRNOT00000001709 | 14,914,351 | INTRONIC | C | T | - | - |
| Mad111 | ENSRNOT00000001709 | 14,920,592 | INTRONIC | A | G | - | - |
| Mad111 | ENSRNOT00000001709 | 14,921,471 | INTRONIC | T | G | - | - |
| Mad111 | ENSRNOT00000001709 | 14,926,902 | INTRONIC | C | T | - | - |
| Mad111 | ENSRNOT00000001709 | 14,928,189 | INTRONIC | G | A | - | - |
| Mad111 | ENSRNOT00000001709 | 14,929,672 | INTRONIC | C | T | - | - |
| Mad111 | ENSRNOT00000001709 | 14,930,318 | INTRONIC | C | T | - | - |
| Mad111 | ENSRNOT00000001709 | 14,931,651 | INTRONIC | T | C | - | - |
| Mad111 | ENSRNOT00000001709 | 14,932,353 | INTRONIC | A | G | - | - |
| Mad111 | ENSRNOT00000001709 | 14,932,904 | INTRONIC | G | T | - | - |
| Mad111 | ENSRNOT00000001709 | 14,933,822 | INTRONIC | C | T | - | - |
| Mad111 | ENSRNOT00000001709 | 14,935,301 | INTRONIC | A | G | - | - |
| Mad111 | ENSRNOT00000001709 | 14,937,027 | INTRONIC | G | A | - | - |
| Mad111 | ENSRNOT00000001709 | 14,938,604 | INTRONIC | A | G | - | - |
| Mad111 | ENSRNOT00000001709 | 14,938,975 | INTRONIC | T | C | - | - |
| Mad111 | ENSRNOT00000001709 | 14,940,328 | INTRONIC | C | T | - | - |
| Mad111 | ENSRNOT00000001709 | 14,944,986 | INTRONIC | T | C | - | - |
| Mad111 | ENSRNOT00000001709 | 14,945,679 | INTRONIC | G | A | - | - |
| Mad111 | ENSRNOT00000001709 | 14,948,844 | INTRONIC | C | T | - | - |
| Mad111 | ENSRNOT00000001709 | 14,949,534 | INTRONIC | A | G | - | - |
| Mad111 | ENSRNOT00000001709 | 14,950,069 | INTRONIC | T | C | - | - |
| Mad111 | ENSRNOT00000001709 | 14,951,186 | INTRONIC | T | C | - | - |
| Mad111 | ENSRNOT00000001709 | 14,952,586 | INTRONIC | A | G | - | - |
| Mad111 | ENSRNOT00000001709 | 14,952,693 | INTRONIC | G | A | - | - |
| Mad111 | ENSRNOT00000001709 | 14,954,380 | INTRONIC | C | T | - | - |
| Mad111 | ENSRNOT00000001709 | 14,955,712 | INTRONIC | A | G | - | - |
| Mad111 | ENSRNOT00000001709 | 14,956,428 | INTRONIC | T | C | - | - |
| Mad111 | ENSRNOT00000001709 | 14,956,523 | INTRONIC | A | G | - | - |
| Mad111 | ENSRNOT00000001709 | 14,957,671 | INTRONIC | C | T | - | - |
| Mad111 | ENSRNOT00000001709 | 14,957,776 | INTRONIC | A | T | - | - |
| Mad111 | ENSRNOT00000001709 | 14,957,819 | INTRONIC | G | A | - | - |
| Mad111 | ENSRNOT00000001709 | 14,958,465 | INTRONIC | C | T | - | - |
| Mad111 | ENSRNOT00000001709 | 14,958,836 | INTRONIC | G | A | - | - |
| Mad111 | ENSRNOT00000001709 | 14,960,611 | INTRONIC | T | C | - | - |
| Mad111 | ENSRNOT00000001709 | 14,960,905 | INTRONIC | T | C | - | - |
| Mad111 | ENSRNOT00000001709 | 14,961,274 | INTRONIC | C | T | - | - |
| Mad111 | ENSRNOT00000001709 | 14,962,833 | INTRONIC | T | C | - | - |
| Mad111 | ENSRNOT00000001709 | 14,962,874 | INTRONIC | A | C | - | - |
| Mad111 | ENSRNOT00000001709 | 14,962,875 | INTRONIC | T | C | - | - |
| Mad111 | ENSRNOT00000001709 | 14,963,333 | INTRONIC | C | T | - | - |
| Mad111 | ENSRNOT00000001709 | 14,964,220 | INTRONIC | G | A | - | - |
| Mad111 | ENSRNOT00000001709 | 14,968,038 | INTRONIC | C | T | - | - |
| Mad111 | ENSRNOT00000001709 | 14,968,797 | INTRONIC | G | A | - | - |
| Mad111 | ENSRNOT00000001709 | 14,969,825 | INTRONIC | T | C | - | - |
| Mad111 | ENSRNOT00000001709 | 14,970,320 | INTRONIC | C | T | - | - |
| Mad111 | ENSRNOT00000001709 | 14,972,363 | INTRONIC | T | C | - | - |
| Mad111 | ENSRNOT00000001709 | 14,972,436 | INTRONIC | C | T | - | - |
| Mad111 | ENSRNOT00000001709 | 14,973,825 | INTRONIC | G | T | - | - |
| Mad111 | ENSRNOT00000001709 | 14,976,948 | INTRONIC | T | C | - | - |
| Mad111 | ENSRNOT00000001709 | 14,977,376 | INTRONIC | C | T | - | - |
| Mad111 | ENSRNOT00000001709 | 14,977,728 | INTRONIC | T | C | - | - |
| Mad111 | ENSRNOT00000001709 | 14,978,145 | INTRONIC | C | A | - | - |
| Mad111 | ENSRNOT00000001709 | 14,979,171 | INTRONIC | G | A | - | - |
| Mad111 | ENSRNOT00000001709 | 14,979,378 | INTRONIC | G | C | - | - |
| Mad111 | ENSRNOT00000001709 | 14,979,804 | INTRONIC | G | A | - | - |
| Mad111 | ENSRNOT00000001709 | 14,980,436 | INTRONIC | T | G | - | - |
| Mad111 | ENSRNOT00000001709 | 14,982,018 | INTRONIC | G | C | - | - |



|        |                    |            |                   |   |   |   |   |
|--------|--------------------|------------|-------------------|---|---|---|---|
| Mad111 | ENSRNOT00000001709 | 14,982,594 | INTRONIC          | T | C | - | - |
| Mad111 | ENSRNOT00000001709 | 14,982,645 | INTRONIC          | T | A | - | - |
| Mad111 | ENSRNOT00000001709 | 14,983,334 | INTRONIC          | T | C | - | - |
| Mad111 | ENSRNOT00000001709 | 14,983,600 | INTRONIC          | G | A | - | - |
| Mad111 | ENSRNOT00000001709 | 14,985,339 | INTRONIC          | C | A | - | - |
| Mad111 | ENSRNOT00000001709 | 14,986,942 | INTRONIC          | A | T | - | - |
| Mad111 | ENSRNOT00000001709 | 14,987,242 | INTRONIC          | T | G | - | - |
| Mad111 | ENSRNOT00000001709 | 14,990,834 | INTRONIC          | C | G | - | - |
| Mad111 | ENSRNOT00000001709 | 14,991,779 | INTRONIC          | G | T | - | - |
| Mad111 | ENSRNOT00000001709 | 14,993,298 | INTRONIC          | G | A | - | - |
| Mad111 | ENSRNOT00000001709 | 14,994,550 | INTRONIC          | T | C | - | - |
| Mad111 | ENSRNOT00000001709 | 14,997,328 | INTRONIC          | T | C | - | - |
| Mad111 | ENSRNOT00000001709 | 14,997,708 | INTRONIC          | T | C | - | - |
| Mad111 | ENSRNOT00000001709 | 14,998,703 | INTRONIC          | T | C | - | - |
| Mad111 | ENSRNOT00000001709 | 14,999,333 | INTRONIC          | C | T | - | - |
| Mad111 | ENSRNOT00000001709 | 15,000,534 | INTRONIC          | T | C | - | - |
| Mad111 | ENSRNOT00000001709 | 15,001,191 | INTRONIC          | G | A | - | - |
| Mad111 | ENSRNOT00000001709 | 15,002,006 | INTRONIC          | A | G | - | - |
| Mad111 | ENSRNOT00000001709 | 15,002,104 | INTRONIC          | G | T | - | - |
| Mad111 | ENSRNOT00000001709 | 15,002,326 | INTRONIC          | G | A | - | - |
| Mad111 | ENSRNOT00000001709 | 15,002,415 | INTRONIC          | A | G | - | - |
| Mad111 | ENSRNOT00000001709 | 15,002,522 | INTRONIC          | A | G | - | - |
| Mad111 | ENSRNOT00000001709 | 15,002,792 | INTRONIC          | A | G | - | - |
| Mad111 | ENSRNOT00000001709 | 15,003,039 | INTRONIC          | C | T | - | - |
| Mad111 | ENSRNOT00000001709 | 15,003,131 | INTRONIC          | T | C | - | - |
| Mad111 | ENSRNOT00000001709 | 15,003,534 | INTRONIC          | T | A | - | - |
| Mad111 | ENSRNOT00000001709 | 15,004,329 | INTRONIC          | G | A | - | - |
| Mad111 | ENSRNOT00000001709 | 15,004,384 | INTRONIC          | T | C | - | - |
| Mad111 | ENSRNOT00000001709 | 15,005,071 | INTRONIC          | C | T | - | - |
| Mad111 | ENSRNOT00000001709 | 15,005,385 | INTRONIC          | C | A | - | - |
| Mad111 | ENSRNOT00000001709 | 15,005,544 | INTRONIC          | A | G | - | - |
| Mad111 | ENSRNOT00000001709 | 15,005,633 | INTRONIC          | G | A | - | - |
| Mad111 | ENSRNOT00000001709 | 15,005,664 | INTRONIC          | G | A | - | - |
| Mad111 | ENSRNOT00000001709 | 15,006,062 | INTRONIC          | A | G | - | - |
| Mad111 | ENSRNOT00000001709 | 15,006,234 | INTRONIC          | G | A | - | - |
| Mad111 | ENSRNOT00000001709 | 15,006,601 | INTRONIC          | G | A | - | - |
| Mad111 | ENSRNOT00000001709 | 15,007,829 | INTRONIC          | A | G | - | - |
| Mad111 | ENSRNOT00000001709 | 15,008,255 | INTRONIC          | T | C | - | - |
| Mad111 | ENSRNOT00000001709 | 15,008,312 | INTRONIC          | T | C | - | - |
| Mad111 | ENSRNOT00000001709 | 15,008,567 | INTRONIC          | T | G | - | - |
| Mad111 | ENSRNOT00000001709 | 15,008,898 | INTRONIC          | A | G | - | - |
| Mad111 | ENSRNOT00000001709 | 15,009,379 | INTRONIC          | C | T | - | - |
| Mad111 | ENSRNOT00000001709 | 15,011,667 | INTRONIC          | A | G | - | - |
| Mad111 | ENSRNOT00000001709 | 15,011,675 | INTRONIC          | A | T | - | - |
| Mad111 | ENSRNOT00000001709 | 15,012,053 | INTRONIC          | T | C | - | - |
| Mad111 | ENSRNOT00000001709 | 15,012,319 | SYNONYMOUS_CODING | A | G | - | - |
| Mad111 | ENSRNOT00000001709 | 15,012,431 | INTRONIC          | A | G | - | - |
| Mad111 | ENSRNOT00000001709 | 15,012,544 | INTRONIC          | A | T | - | - |
| Mad111 | ENSRNOT00000001709 | 15,012,643 | INTRONIC          | G | T | - | - |
| Mad111 | ENSRNOT00000001709 | 15,013,559 | INTRONIC          | G | T | - | - |
| Mad111 | ENSRNOT00000001709 | 15,014,073 | INTRONIC          | T | C | - | - |
| Mad111 | ENSRNOT00000001709 | 15,014,854 | INTRONIC          | G | A | - | - |
| Mad111 | ENSRNOT00000001709 | 15,016,969 | INTRONIC          | C | T | - | - |
| Mad111 | ENSRNOT00000001709 | 15,017,183 | INTRONIC          | T | G | - | - |
| Mad111 | ENSRNOT00000001709 | 15,017,632 | INTRONIC          | C | T | - | - |
| Mad111 | ENSRNOT00000001709 | 15,018,200 | INTRONIC          | T | A | - | - |
| Mad111 | ENSRNOT00000001709 | 15,018,244 | INTRONIC          | T | C | - | - |
| Mad111 | ENSRNOT00000001709 | 15,018,590 | INTRONIC          | C | T | - | - |
| Mad111 | ENSRNOT00000001709 | 15,018,617 | INTRONIC          | C | T | - | - |
| Mad111 | ENSRNOT00000001709 | 15,018,745 | INTRONIC          | A | C | - | - |
| Mad111 | ENSRNOT00000001709 | 15,018,751 | INTRONIC          | C | G | - | - |
| Mad111 | ENSRNOT00000001709 | 15,018,908 | INTRONIC          | T | A | - | - |
| Mad111 | ENSRNOT00000001709 | 15,018,921 | INTRONIC          | G | A | - | - |
| Mad111 | ENSRNOT00000001709 | 15,019,440 | INTRONIC          | A | T | - | - |
| Mad111 | ENSRNOT00000001709 | 15,019,828 | INTRONIC          | A | G | - | - |
| Mad111 | ENSRNOT00000001709 | 15,021,020 | INTRONIC          | C | T | - | - |
| Mad111 | ENSRNOT00000001709 | 15,021,150 | INTRONIC          | G | A | - | - |
| Mad111 | ENSRNOT00000001709 | 15,021,311 | INTRONIC          | T | C | - | - |
| Mad111 | ENSRNOT00000001709 | 15,021,621 | INTRONIC          | C | T | - | - |
| Mad111 | ENSRNOT00000001709 | 15,022,315 | INTRONIC          | T | A | - | - |
| Mad111 | ENSRNOT00000001709 | 15,022,316 | INTRONIC          | G | C | - | - |
| Mad111 | ENSRNOT00000001709 | 15,022,542 | INTRONIC          | G | T | - | - |
| Mad111 | ENSRNOT00000001709 | 15,023,405 | INTRONIC          | G | T | - | - |
| Mad111 | ENSRNOT00000001709 | 15,023,765 | INTRONIC          | G | A | - | - |
| Mad111 | ENSRNOT00000001709 | 15,023,857 | INTRONIC          | G | A | - | - |
| Mad111 | ENSRNOT00000001709 | 15,024,042 | INTRONIC          | C | T | - | - |
| Mad111 | ENSRNOT00000001709 | 15,024,667 | INTRONIC          | T | C | - | - |
| Mad111 | ENSRNOT00000001709 | 15,024,953 | INTRONIC          | G | A | - | - |
| Mad111 | ENSRNOT00000001709 | 15,025,295 | INTRONIC          | C | T | - | - |
| Mad111 | ENSRNOT00000001709 | 15,025,709 | INTRONIC          | T | G | - | - |

|        |                    |            |                   |   |   |   |   |
|--------|--------------------|------------|-------------------|---|---|---|---|
| Mad111 | ENSRNOT00000001709 | 15,025,811 | INTRONIC          | A | G | - | - |
| Mad111 | ENSRNOT00000001709 | 15,026,167 | INTRONIC          | T | C | - | - |
| Mad111 | ENSRNOT00000001709 | 15,026,319 | INTRONIC          | A | G | - | - |
| Mad111 | ENSRNOT00000001709 | 15,026,357 | INTRONIC          | C | T | - | - |
| Mad111 | ENSRNOT00000001709 | 15,026,440 | INTRONIC          | G | A | - | - |
| Mad111 | ENSRNOT00000001709 | 15,026,752 | INTRONIC          | T | C | - | - |
| Mad111 | ENSRNOT00000001709 | 15,026,891 | INTRONIC          | G | A | - | - |
| Mad111 | ENSRNOT00000001709 | 15,027,418 | INTRONIC          | G | A | - | - |
| Mad111 | ENSRNOT00000001709 | 15,028,542 | INTRONIC          | G | T | - | - |
| Mad111 | ENSRNOT00000001709 | 15,028,594 | INTRONIC          | G | T | - | - |
| Mad111 | ENSRNOT00000001709 | 15,028,846 | INTRONIC          | A | T | - | - |
| Mad111 | ENSRNOT00000001709 | 15,028,971 | INTRONIC          | T | C | - | - |
| Mad111 | ENSRNOT00000001709 | 15,029,011 | INTRONIC          | C | T | - | - |
| Mad111 | ENSRNOT00000001709 | 15,029,112 | INTRONIC          | T | G | - | - |
| Mad111 | ENSRNOT00000001709 | 15,029,300 | SYNONYMOUS_CODING | T | C | - | - |
| Mad111 | ENSRNOT00000001709 | 15,029,535 | INTRONIC          | T | C | - | - |
| Mad111 | ENSRNOT00000001709 | 15,029,671 | INTRONIC          | T | C | - | - |
| Mad111 | ENSRNOT00000001709 | 15,030,098 | INTRONIC          | A | G | - | - |
| Mad111 | ENSRNOT00000001709 | 15,030,259 | INTRONIC          | G | A | - | - |
| Mad111 | ENSRNOT00000001709 | 15,030,517 | INTRONIC          | T | C | - | - |
| Mad111 | ENSRNOT00000001709 | 15,030,539 | INTRONIC          | C | A | - | - |
| Mad111 | ENSRNOT00000001709 | 15,030,754 | INTRONIC          | G | T | - | - |
| Mad111 | ENSRNOT00000001709 | 15,030,934 | INTRONIC          | C | T | - | - |
| Mad111 | ENSRNOT00000001709 | 15,031,628 | INTRONIC          | A | C | - | - |
| Mad111 | ENSRNOT00000001709 | 15,032,103 | INTRONIC          | G | A | - | - |
| Mad111 | ENSRNOT00000001709 | 15,032,514 | INTRONIC          | T | C | - | - |
| Mad111 | ENSRNOT00000001709 | 15,032,550 | INTRONIC          | A | C | - | - |
| Mad111 | ENSRNOT00000001709 | 15,032,596 | INTRONIC          | A | C | - | - |
| Mad111 | ENSRNOT00000001709 | 15,032,603 | INTRONIC          | A | T | - | - |
| Mad111 | ENSRNOT00000001709 | 15,032,739 | INTRONIC          | C | A | - | - |
| Mad111 | ENSRNOT00000001709 | 15,032,772 | INTRONIC          | T | G | - | - |
| Mad111 | ENSRNOT00000001709 | 15,032,773 | INTRONIC          | C | G | - | - |
| Mad111 | ENSRNOT00000001709 | 15,032,906 | INTRONIC          | A | C | - | - |
| Mad111 | ENSRNOT00000001709 | 15,033,083 | INTRONIC          | C | G | - | - |
| Mad111 | ENSRNOT00000001709 | 15,033,289 | INTRONIC          | G | C | - | - |
| Mad111 | ENSRNOT00000001709 | 15,034,205 | INTRONIC          | A | G | - | - |
| Mad111 | ENSRNOT00000001709 | 15,034,694 | INTRONIC          | A | C | - | - |
| Mad111 | ENSRNOT00000001709 | 15,035,727 | INTRONIC          | A | G | - | - |
| Mad111 | ENSRNOT00000001709 | 15,036,393 | INTRONIC          | T | C | - | - |
| Mad111 | ENSRNOT00000001709 | 15,036,427 | INTRONIC          | G | A | - | - |
| Mad111 | ENSRNOT00000001709 | 15,037,272 | INTRONIC          | T | C | - | - |
| Mad111 | ENSRNOT00000001709 | 15,037,568 | INTRONIC          | A | G | - | - |
| Mad111 | ENSRNOT00000001709 | 15,038,122 | INTRONIC          | T | C | - | - |
| Mad111 | ENSRNOT00000001709 | 15,038,671 | INTRONIC          | A | G | - | - |
| Mad111 | ENSRNOT00000001709 | 15,038,797 | INTRONIC          | A | G | - | - |
| Mad111 | ENSRNOT00000001709 | 15,039,360 | INTRONIC          | C | T | - | - |
| Mad111 | ENSRNOT00000001709 | 15,039,753 | INTRONIC          | G | T | - | - |
| Mad111 | ENSRNOT00000001709 | 15,039,994 | INTRONIC          | C | T | - | - |
| Mad111 | ENSRNOT00000001709 | 15,040,026 | INTRONIC          | C | A | - | - |
| Mad111 | ENSRNOT00000001709 | 15,040,917 | INTRONIC          | C | T | - | - |
| Mad111 | ENSRNOT00000001709 | 15,041,174 | INTRONIC          | G | T | - | - |
| Mad111 | ENSRNOT00000001709 | 15,041,204 | INTRONIC          | A | G | - | - |
| Mad111 | ENSRNOT00000001709 | 15,041,564 | INTRONIC          | G | A | - | - |
| Mad111 | ENSRNOT00000001709 | 15,041,626 | INTRONIC          | A | T | - | - |
| Mad111 | ENSRNOT00000001709 | 15,041,950 | INTRONIC          | C | T | - | - |
| Mad111 | ENSRNOT00000001709 | 15,041,980 | INTRONIC          | C | T | - | - |
| Mad111 | ENSRNOT00000001709 | 15,042,083 | INTRONIC          | C | T | - | - |
| Mad111 | ENSRNOT00000001709 | 15,042,198 | INTRONIC          | G | A | - | - |
| Mad111 | ENSRNOT00000001709 | 15,042,257 | INTRONIC          | T | C | - | - |
| Mad111 | ENSRNOT00000001709 | 15,042,412 | INTRONIC          | A | G | - | - |
| Mad111 | ENSRNOT00000001709 | 15,042,641 | INTRONIC          | A | T | - | - |
| Mad111 | ENSRNOT00000001709 | 15,043,449 | INTRONIC          | T | G | - | - |
| Mad111 | ENSRNOT00000001709 | 15,043,557 | INTRONIC          | G | C | - | - |
| Mad111 | ENSRNOT00000001709 | 15,043,872 | INTRONIC          | A | G | - | - |
| Mad111 | ENSRNOT00000001709 | 15,044,063 | INTRONIC          | G | A | - | - |
| Mad111 | ENSRNOT00000001709 | 15,044,143 | INTRONIC          | A | C | - | - |
| Mad111 | ENSRNOT00000001709 | 15,044,356 | INTRONIC          | C | T | - | - |
| Mad111 | ENSRNOT00000001709 | 15,044,403 | INTRONIC          | G | A | - | - |
| Mad111 | ENSRNOT00000001709 | 15,047,223 | INTRONIC          | A | C | - | - |
| Mad111 | ENSRNOT00000001709 | 15,047,437 | INTRONIC          | C | T | - | - |
| Mad111 | ENSRNOT00000001709 | 15,047,454 | INTRONIC          | A | G | - | - |
| Mad111 | ENSRNOT00000001709 | 15,047,474 | INTRONIC          | G | A | - | - |
| Mad111 | ENSRNOT00000001709 | 15,047,929 | INTRONIC          | A | G | - | - |
| Mad111 | ENSRNOT00000001709 | 15,048,297 | INTRONIC          | A | T | - | - |
| Mad111 | ENSRNOT00000001709 | 15,049,246 | INTRONIC          | G | T | - | - |
| Mad111 | ENSRNOT00000001709 | 15,049,303 | INTRONIC          | C | T | - | - |
| Mad111 | ENSRNOT00000001709 | 15,049,565 | INTRONIC          | G | A | - | - |
| Mad111 | ENSRNOT00000001709 | 15,049,579 | INTRONIC          | C | G | - | - |
| Mad111 | ENSRNOT00000001709 | 15,049,716 | INTRONIC          | G | A | - | - |
| Mad111 | ENSRNOT00000001709 | 15,049,956 | INTRONIC          | C | A | - | - |

|        |                    |            |          |   |   |   |   |
|--------|--------------------|------------|----------|---|---|---|---|
| Mad111 | ENSRNOT00000001709 | 15,050,024 | INTRONIC | A | G | - | - |
| Mad111 | ENSRNOT00000001709 | 15,050,070 | INTRONIC | A | G | - | - |
| Mad111 | ENSRNOT00000001709 | 15,050,364 | INTRONIC | C | T | - | - |
| Mad111 | ENSRNOT00000001709 | 15,050,377 | INTRONIC | G | A | - | - |
| Mad111 | ENSRNOT00000001709 | 15,050,489 | INTRONIC | C | T | - | - |
| Mad111 | ENSRNOT00000001709 | 15,050,584 | INTRONIC | C | G | - | - |
| Mad111 | ENSRNOT00000001709 | 15,050,635 | INTRONIC | G | A | - | - |
| Mad111 | ENSRNOT00000001709 | 15,050,761 | INTRONIC | G | T | - | - |
| Mad111 | ENSRNOT00000001709 | 15,051,624 | INTRONIC | G | A | - | - |
| Mad111 | ENSRNOT00000001709 | 15,051,963 | INTRONIC | T | C | - | - |
| Mad111 | ENSRNOT00000001709 | 15,054,152 | INTRONIC | T | C | - | - |
| Mad111 | ENSRNOT00000001709 | 15,054,700 | INTRONIC | A | G | - | - |
| Mad111 | ENSRNOT00000001709 | 15,056,418 | INTRONIC | G | T | - | - |
| Mad111 | ENSRNOT00000001709 | 15,056,427 | INTRONIC | C | G | - | - |
| Mad111 | ENSRNOT00000001709 | 15,057,432 | INTRONIC | A | G | - | - |
| Mad111 | ENSRNOT00000001709 | 15,057,660 | INTRONIC | A | G | - | - |
| Mad111 | ENSRNOT00000001709 | 15,058,427 | INTRONIC | T | C | - | - |
| Mad111 | ENSRNOT00000001709 | 15,058,987 | INTRONIC | T | C | - | - |
| Mad111 | ENSRNOT00000001709 | 15,060,752 | INTRONIC | C | T | - | - |
| Mad111 | ENSRNOT00000001709 | 15,060,757 | INTRONIC | T | G | - | - |
| Mad111 | ENSRNOT00000001709 | 15,060,770 | INTRONIC | G | A | - | - |
| Mad111 | ENSRNOT00000001709 | 15,060,823 | INTRONIC | A | G | - | - |
| Mad111 | ENSRNOT00000001709 | 15,061,135 | INTRONIC | A | G | - | - |
| Mad111 | ENSRNOT00000001709 | 15,062,340 | INTRONIC | A | G | - | - |
| Mad111 | ENSRNOT00000001709 | 15,062,489 | INTRONIC | T | C | - | - |
| Mad111 | ENSRNOT00000001709 | 15,062,523 | INTRONIC | G | A | - | - |
| Mad111 | ENSRNOT00000001709 | 15,065,411 | INTRONIC | C | T | - | - |
| Mad111 | ENSRNOT00000001709 | 15,066,182 | INTRONIC | G | A | - | - |
| Mad111 | ENSRNOT00000001709 | 15,066,292 | INTRONIC | G | A | - | - |
| Mad111 | ENSRNOT00000001709 | 15,067,698 | INTRONIC | C | T | - | - |
| Mad111 | ENSRNOT00000001709 | 15,068,472 | INTRONIC | A | G | - | - |
| Mad111 | ENSRNOT00000001709 | 15,068,720 | INTRONIC | G | A | - | - |
| Mad111 | ENSRNOT00000001709 | 15,069,247 | INTRONIC | T | G | - | - |
| Mad111 | ENSRNOT00000001709 | 15,069,251 | INTRONIC | T | G | - | - |
| Mad111 | ENSRNOT00000001709 | 15,069,755 | INTRONIC | A | C | - | - |
| Mad111 | ENSRNOT00000001709 | 15,069,757 | INTRONIC | A | T | - | - |
| Mad111 | ENSRNOT00000001709 | 15,069,774 | INTRONIC | T | G | - | - |
| Mad111 | ENSRNOT00000001709 | 15,069,929 | INTRONIC | C | G | - | - |
| Mad111 | ENSRNOT00000001709 | 15,070,174 | INTRONIC | G | A | - | - |
| Mad111 | ENSRNOT00000001709 | 15,070,830 | INTRONIC | T | A | - | - |
| Mad111 | ENSRNOT00000001709 | 15,070,908 | INTRONIC | A | C | - | - |
| Mad111 | ENSRNOT00000001709 | 15,071,207 | INTRONIC | C | T | - | - |
| Mad111 | ENSRNOT00000001709 | 15,071,313 | INTRONIC | G | A | - | - |
| Mad111 | ENSRNOT00000001709 | 15,071,397 | INTRONIC | G | A | - | - |
| Mad111 | ENSRNOT00000001709 | 15,071,976 | INTRONIC | C | T | - | - |
| Mad111 | ENSRNOT00000001709 | 15,071,978 | INTRONIC | G | A | - | - |
| Mad111 | ENSRNOT00000001709 | 15,072,173 | INTRONIC | A | G | - | - |
| Mad111 | ENSRNOT00000001709 | 15,072,757 | INTRONIC | A | G | - | - |
| Mad111 | ENSRNOT00000001709 | 15,073,027 | INTRONIC | G | A | - | - |
| Mad111 | ENSRNOT00000001709 | 15,074,384 | INTRONIC | T | G | - | - |
| Mad111 | ENSRNOT00000001709 | 15,074,531 | INTRONIC | C | A | - | - |
| Mad111 | ENSRNOT00000001709 | 15,075,039 | INTRONIC | G | C | - | - |
| Mad111 | ENSRNOT00000001709 | 15,075,276 | INTRONIC | A | G | - | - |
| Mad111 | ENSRNOT00000001709 | 15,075,568 | INTRONIC | C | T | - | - |
| Mad111 | ENSRNOT00000001709 | 15,076,066 | INTRONIC | C | T | - | - |
| Mad111 | ENSRNOT00000001709 | 15,077,055 | INTRONIC | T | C | - | - |
| Mad111 | ENSRNOT00000001709 | 15,077,632 | INTRONIC | C | T | - | - |
| Mad111 | ENSRNOT00000001709 | 15,077,772 | INTRONIC | G | T | - | - |
| Mad111 | ENSRNOT00000001709 | 15,079,052 | INTRONIC | G | A | - | - |
| Mad111 | ENSRNOT00000001709 | 15,079,386 | INTRONIC | A | T | - | - |
| Mad111 | ENSRNOT00000001709 | 15,080,213 | INTRONIC | C | T | - | - |
| Mad111 | ENSRNOT00000001709 | 15,080,348 | INTRONIC | G | A | - | - |
| Mad111 | ENSRNOT00000001709 | 15,081,968 | INTRONIC | A | G | - | - |
| Mad111 | ENSRNOT00000001709 | 15,082,690 | INTRONIC | A | G | - | - |
| Mad111 | ENSRNOT00000001709 | 15,083,133 | INTRONIC | A | G | - | - |
| Mad111 | ENSRNOT00000001709 | 15,083,153 | INTRONIC | A | G | - | - |
| Mad111 | ENSRNOT00000001709 | 15,083,435 | INTRONIC | T | C | - | - |
| Mad111 | ENSRNOT00000001709 | 15,086,053 | INTRONIC | T | C | - | - |
| Mad111 | ENSRNOT00000001709 | 15,086,654 | INTRONIC | T | A | - | - |
| Mad111 | ENSRNOT00000001709 | 15,086,852 | INTRONIC | A | G | - | - |
| Mad111 | ENSRNOT00000001709 | 15,087,328 | INTRONIC | T | C | - | - |
| Mad111 | ENSRNOT00000001709 | 15,087,719 | INTRONIC | T | A | - | - |
| Mad111 | ENSRNOT00000001709 | 15,087,898 | INTRONIC | T | G | - | - |
| Mad111 | ENSRNOT00000001709 | 15,088,104 | INTRONIC | G | A | - | - |
| Mad111 | ENSRNOT00000001709 | 15,089,150 | INTRONIC | A | G | - | - |
| Mad111 | ENSRNOT00000001709 | 15,089,645 | INTRONIC | A | G | - | - |
| Mad111 | ENSRNOT00000001709 | 15,090,114 | INTRONIC | T | G | - | - |
| Mad111 | ENSRNOT00000001709 | 15,090,638 | INTRONIC | T | C | - | - |
| Mad111 | ENSRNOT00000001709 | 15,092,044 | INTRONIC | A | G | - | - |
| Mad111 | ENSRNOT00000001709 | 15,094,393 | INTRONIC | T | G | - | - |

|        |                    |            |            |   |   |   |   |
|--------|--------------------|------------|------------|---|---|---|---|
| Mad111 | ENSRNOT00000001709 | 15,096,138 | INTRONIC   | C | T | - | - |
| Mad111 | ENSRNOT00000001709 | 15,096,487 | INTRONIC   | A | G | - | - |
| Mad111 | ENSRNOT00000001709 | 15,096,847 | INTRONIC   | A | C | - | - |
| Mad111 | ENSRNOT00000001709 | 15,097,228 | INTRONIC   | G | T | - | - |
| Mad111 | ENSRNOT00000001709 | 15,098,376 | INTRONIC   | G | A | - | - |
| Mad111 | ENSRNOT00000001709 | 15,098,855 | INTRONIC   | A | G | - | - |
| Mad111 | ENSRNOT00000001709 | 15,099,167 | INTRONIC   | G | A | - | - |
| Mad111 | ENSRNOT00000001709 | 15,099,223 | INTRONIC   | T | C | - | - |
| Mad111 | ENSRNOT00000001709 | 15,099,362 | INTRONIC   | A | C | - | - |
| Mad111 | ENSRNOT00000001709 | 15,099,587 | INTRONIC   | G | A | - | - |
| Mad111 | ENSRNOT00000001709 | 15,099,905 | INTRONIC   | T | A | - | - |
| Mad111 | ENSRNOT00000001709 | 15,099,928 | INTRONIC   | C | A | - | - |
| Mad111 | ENSRNOT00000001709 | 15,100,823 | INTRONIC   | A | G | - | - |
| Mad111 | ENSRNOT00000001709 | 15,101,308 | INTRONIC   | A | C | - | - |
| Mad111 | ENSRNOT00000001709 | 15,101,615 | INTRONIC   | T | C | - | - |
| Mad111 | ENSRNOT00000001709 | 15,101,746 | INTRONIC   | A | G | - | - |
| Mad111 | ENSRNOT00000001709 | 15,102,463 | INTRONIC   | A | G | - | - |
| Mad111 | ENSRNOT00000001709 | 15,104,697 | INTRONIC   | A | T | - | - |
| Mad111 | ENSRNOT00000001709 | 15,107,147 | 3PRIME_UTR | A | G | - | - |
| Mad111 | ENSRNOT00000001709 | 15,107,332 | 3PRIME_UTR | G | C | - | - |
| Mad111 | ENSRNOT00000001709 | 15,107,777 | DOWNSTREAM | A | G | - | - |
| Mad111 | ENSRNOT00000001709 | 15,108,379 | DOWNSTREAM | T | C | - | - |
| Mad111 | ENSRNOT00000001709 | 15,108,612 | DOWNSTREAM | T | C | - | - |
| Mad111 | ENSRNOT00000001709 | 15,109,164 | DOWNSTREAM | G | C | - | - |
| Mad111 | ENSRNOT00000001709 | 15,109,921 | DOWNSTREAM | A | G | - | - |
| Mad111 | ENSRNOT00000001709 | 15,109,953 | DOWNSTREAM | G | A | - | - |
| Mad111 | ENSRNOT00000001709 | 15,110,200 | DOWNSTREAM | C | T | - | - |
| -      | -                  | 15,113,102 | INTERGENIC | C | G | - | - |
| -      | -                  | 15,113,253 | INTERGENIC | A | G | - | - |
| -      | -                  | 15,113,835 | INTERGENIC | T | C | - | - |
| -      | -                  | 15,114,528 | INTERGENIC | T | C | - | - |
| -      | -                  | 15,115,269 | INTERGENIC | T | C | - | - |
| -      | -                  | 15,115,819 | INTERGENIC | C | T | - | - |
| -      | -                  | 15,116,076 | INTERGENIC | T | G | - | - |
| -      | -                  | 15,116,334 | INTERGENIC | A | G | - | - |
| -      | -                  | 15,116,650 | INTERGENIC | T | C | - | - |
| -      | -                  | 15,116,663 | INTERGENIC | A | G | - | - |
| -      | -                  | 15,119,683 | INTERGENIC | G | A | - | - |
| -      | -                  | 15,121,332 | INTERGENIC | G | A | - | - |
| -      | -                  | 15,121,342 | INTERGENIC | A | G | - | - |
| -      | -                  | 15,123,631 | INTERGENIC | G | A | - | - |
| -      | -                  | 15,124,161 | INTERGENIC | T | C | - | - |
| -      | -                  | 15,124,869 | INTERGENIC | C | A | - | - |
| -      | -                  | 15,124,881 | INTERGENIC | T | C | - | - |
| -      | -                  | 15,125,617 | INTERGENIC | C | T | - | - |
| -      | -                  | 15,125,618 | INTERGENIC | A | G | - | - |
| -      | -                  | 15,125,662 | INTERGENIC | G | A | - | - |
| -      | -                  | 15,125,704 | INTERGENIC | T | C | - | - |
| -      | -                  | 15,126,084 | INTERGENIC | A | G | - | - |
| -      | -                  | 15,126,109 | INTERGENIC | T | G | - | - |
| -      | -                  | 15,126,191 | INTERGENIC | G | A | - | - |
| -      | -                  | 15,126,365 | INTERGENIC | T | C | - | - |
| -      | -                  | 15,126,572 | INTERGENIC | C | G | - | - |
| -      | -                  | 15,126,587 | INTERGENIC | T | A | - | - |
| -      | -                  | 15,126,590 | INTERGENIC | C | T | - | - |
| -      | -                  | 15,126,608 | INTERGENIC | C | T | - | - |
| -      | -                  | 15,126,609 | INTERGENIC | A | G | - | - |
| -      | -                  | 15,126,693 | INTERGENIC | A | G | - | - |
| -      | -                  | 15,126,801 | INTERGENIC | A | G | - | - |
| -      | -                  | 15,127,167 | INTERGENIC | A | G | - | - |
| -      | -                  | 15,127,497 | INTERGENIC | A | T | - | - |
| -      | -                  | 15,127,500 | INTERGENIC | G | A | - | - |
| -      | -                  | 15,127,533 | INTERGENIC | C | T | - | - |
| -      | -                  | 15,127,540 | INTERGENIC | G | A | - | - |
| -      | -                  | 15,127,948 | INTERGENIC | A | G | - | - |
| -      | -                  | 15,127,959 | INTERGENIC | A | G | - | - |
| -      | -                  | 15,128,304 | INTERGENIC | C | T | - | - |
| -      | -                  | 15,128,394 | INTERGENIC | C | T | - | - |
| -      | -                  | 15,128,441 | INTERGENIC | A | G | - | - |
| -      | -                  | 15,128,501 | INTERGENIC | G | A | - | - |
| -      | -                  | 15,128,588 | INTERGENIC | A | G | - | - |
| -      | -                  | 15,128,699 | INTERGENIC | T | C | - | - |
| -      | -                  | 15,129,118 | INTERGENIC | A | G | - | - |
| -      | -                  | 15,129,353 | INTERGENIC | T | C | - | - |
| -      | -                  | 15,129,831 | INTERGENIC | G | A | - | - |
| -      | -                  | 15,130,133 | INTERGENIC | G | A | - | - |
| -      | -                  | 15,130,253 | INTERGENIC | T | A | - | - |
| -      | -                  | 15,130,395 | INTERGENIC | G | C | - | - |
| -      | -                  | 15,130,873 | INTERGENIC | C | T | - | - |
| -      | -                  | 15,130,890 | INTERGENIC | G | A | - | - |

|       |                    |            |                       |   |   |   |   |
|-------|--------------------|------------|-----------------------|---|---|---|---|
|       | -                  | 15,130,910 | INTERGENIC            | T | G | - | - |
|       | -                  | 15,130,926 | INTERGENIC            | T | C | - | - |
|       | -                  | 15,131,079 | INTERGENIC            | G | T | - | - |
|       | -                  | 15,131,608 | INTERGENIC            | G | A | - | - |
|       | -                  | 15,131,631 | INTERGENIC            | G | A | - | - |
|       | -                  | 15,131,761 | INTERGENIC            | A | C | - | - |
|       | -                  | 15,131,764 | INTERGENIC            | T | A | - | - |
|       | -                  | 15,131,796 | INTERGENIC            | G | T | - | - |
| Elfn1 | ENSRNOT00000033551 | 15,132,010 | DOWNSTREAM            | C | T | - | - |
| Elfn1 | ENSRNOT00000033551 | 15,132,081 | DOWNSTREAM            | C | T | - | - |
| Elfn1 | ENSRNOT00000033551 | 15,132,608 | DOWNSTREAM            | A | G | - | - |
| Elfn1 | ENSRNOT00000033551 | 15,133,153 | DOWNSTREAM            | C | T | - | - |
| Elfn1 | ENSRNOT00000033551 | 15,133,492 | DOWNSTREAM            | G | C | - | - |
| Elfn1 | ENSRNOT00000033551 | 15,133,541 | DOWNSTREAM            | G | C | - | - |
| Elfn1 | ENSRNOT00000033551 | 15,133,637 | DOWNSTREAM            | C | T | - | - |
| Elfn1 | ENSRNOT00000033551 | 15,133,660 | DOWNSTREAM            | A | T | - | - |
| Elfn1 | ENSRNOT00000033551 | 15,133,699 | DOWNSTREAM            | A | G | - | - |
| Elfn1 | ENSRNOT00000033551 | 15,134,178 | DOWNSTREAM            | G | C | - | - |
| Elfn1 | ENSRNOT00000033551 | 15,134,268 | DOWNSTREAM            | A | G | - | - |
| Elfn1 | ENSRNOT00000033551 | 15,134,379 | DOWNSTREAM            | A | G | - | - |
| Elfn1 | ENSRNOT00000033551 | 15,135,051 | DOWNSTREAM            | G | C | - | - |
| Elfn1 | ENSRNOT00000033551 | 15,135,603 | DOWNSTREAM            | T | C | - | - |
| Elfn1 | ENSRNOT00000033551 | 15,135,883 | DOWNSTREAM            | G | C | - | - |
| Elfn1 | ENSRNOT00000033551 | 15,136,406 | DOWNSTREAM            | C | G | - | - |
| Elfn1 | ENSRNOT00000033551 | 15,137,168 | 3PRIME_UTR            | G | A | - | - |
| Elfn1 | ENSRNOT00000033551 | 15,137,512 | 3PRIME_UTR            | G | A | - | - |
| Elfn1 | ENSRNOT00000033551 | 15,137,535 | 3PRIME_UTR            | A | T | - | - |
| Elfn1 | ENSRNOT00000033551 | 15,137,843 | 3PRIME_UTR            | T | G | - | - |
| Elfn1 | ENSRNOT00000033551 | 15,139,306 | SYNONYMOUS_CODING     | C | G | - | - |
| Elfn1 | ENSRNOT00000033551 | 15,139,327 | SYNONYMOUS_CODING     | G | A | - | - |
| Elfn1 | ENSRNOT00000033551 | 15,139,465 | SYNONYMOUS_CODING     | T | C | - | - |
| Elfn1 | ENSRNOT00000033551 | 15,139,471 | SYNONYMOUS_CODING     | G | C | - | - |
| Elfn1 | ENSRNOT00000033551 | 15,139,510 | NON_SYNONYMOUS_CODING | C | T | M | I |
| Elfn1 | ENSRNOT00000033551 | 15,140,068 | SYNONYMOUS_CODING     | G | A | - | - |
| Elfn1 | ENSRNOT00000033551 | 15,140,396 | 5PRIME_UTR            | C | G | - | - |
| Elfn1 | ENSRNOT00000033551 | 15,141,226 | INTRONIC              | G | T | - | - |
| Elfn1 | ENSRNOT00000033551 | 15,141,406 | INTRONIC              | T | C | - | - |
| Elfn1 | ENSRNOT00000033551 | 15,141,768 | INTRONIC              | G | C | - | - |
| Elfn1 | ENSRNOT00000033551 | 15,141,822 | INTRONIC              | A | C | - | - |
| Elfn1 | ENSRNOT00000033551 | 15,142,100 | INTRONIC              | A | T | - | - |
| Elfn1 | ENSRNOT00000033551 | 15,142,240 | INTRONIC              | C | T | - | - |
| Elfn1 | ENSRNOT00000033551 | 15,142,285 | INTRONIC              | C | T | - | - |
| Elfn1 | ENSRNOT00000033551 | 15,142,490 | INTRONIC              | T | C | - | - |
| Elfn1 | ENSRNOT00000033551 | 15,143,062 | INTRONIC              | A | T | - | - |
| Elfn1 | ENSRNOT00000033551 | 15,143,951 | INTRONIC              | T | C | - | - |
| Elfn1 | ENSRNOT00000033551 | 15,144,024 | INTRONIC              | T | C | - | - |
| Elfn1 | ENSRNOT00000033551 | 15,144,209 | INTRONIC              | T | C | - | - |
| Elfn1 | ENSRNOT00000033551 | 15,145,632 | INTRONIC              | C | T | - | - |
| Elfn1 | ENSRNOT00000033551 | 15,145,914 | INTRONIC              | C | G | - | - |
| Elfn1 | ENSRNOT00000033551 | 15,145,916 | INTRONIC              | G | T | - | - |
| Elfn1 | ENSRNOT00000033551 | 15,146,123 | INTRONIC              | T | C | - | - |
| Elfn1 | ENSRNOT00000033551 | 15,146,180 | INTRONIC              | C | T | - | - |
| Elfn1 | ENSRNOT00000033551 | 15,146,252 | INTRONIC              | A | G | - | - |
| Elfn1 | ENSRNOT00000033551 | 15,146,566 | INTRONIC              | G | T | - | - |
| Elfn1 | ENSRNOT00000033551 | 15,146,567 | INTRONIC              | A | C | - | - |
| Elfn1 | ENSRNOT00000033551 | 15,146,584 | INTRONIC              | A | G | - | - |
| Elfn1 | ENSRNOT00000033551 | 15,147,385 | INTRONIC              | G | C | - | - |
| Elfn1 | ENSRNOT00000033551 | 15,148,167 | INTRONIC              | T | C | - | - |
| Elfn1 | ENSRNOT00000033551 | 15,148,452 | INTRONIC              | G | A | - | - |
| Elfn1 | ENSRNOT00000033551 | 15,148,526 | INTRONIC              | G | A | - | - |
| Elfn1 | ENSRNOT00000033551 | 15,148,875 | INTRONIC              | T | G | - | - |
| Elfn1 | ENSRNOT00000033551 | 15,149,786 | INTRONIC              | C | A | - | - |
| Elfn1 | ENSRNOT00000033551 | 15,150,276 | INTRONIC              | C | T | - | - |
| Elfn1 | ENSRNOT00000033551 | 15,151,667 | INTRONIC              | C | A | - | - |
| Elfn1 | ENSRNOT00000033551 | 15,152,332 | INTRONIC              | C | T | - | - |
| Elfn1 | ENSRNOT00000033551 | 15,153,026 | INTRONIC              | C | T | - | - |
| Elfn1 | ENSRNOT00000033551 | 15,153,972 | INTRONIC              | A | C | - | - |
| Elfn1 | ENSRNOT00000033551 | 15,155,517 | INTRONIC              | A | G | - | - |
| Elfn1 | ENSRNOT00000033551 | 15,155,573 | INTRONIC              | T | C | - | - |
| Elfn1 | ENSRNOT00000033551 | 15,155,696 | INTRONIC              | A | G | - | - |
| Elfn1 | ENSRNOT00000033551 | 15,155,926 | INTRONIC              | T | G | - | - |
| Elfn1 | ENSRNOT00000033551 | 15,156,396 | INTRONIC              | T | C | - | - |
| Elfn1 | ENSRNOT00000033551 | 15,156,420 | INTRONIC              | A | C | - | - |
| Elfn1 | ENSRNOT00000033551 | 15,156,778 | INTRONIC              | T | C | - | - |
| Elfn1 | ENSRNOT00000033551 | 15,157,329 | INTRONIC              | A | G | - | - |
| Elfn1 | ENSRNOT00000033551 | 15,157,498 | INTRONIC              | A | G | - | - |
| Elfn1 | ENSRNOT00000033551 | 15,158,524 | INTRONIC              | G | A | - | - |
| Elfn1 | ENSRNOT00000033551 | 15,158,875 | INTRONIC              | C | T | - | - |
| Elfn1 | ENSRNOT00000033551 | 15,159,100 | INTRONIC              | C | T | - | - |
| Elfn1 | ENSRNOT00000033551 | 15,160,106 | INTRONIC              | A | G | - | - |

|       |                    |            |            |   |   |   |   |
|-------|--------------------|------------|------------|---|---|---|---|
| Elfn1 | ENSRNOT00000033551 | 15,160,294 | INTRONIC   | T | C | - | - |
| Elfn1 | ENSRNOT00000033551 | 15,161,800 | INTRONIC   | C | G | - | - |
| Elfn1 | ENSRNOT00000033551 | 15,161,843 | INTRONIC   | G | T | - | - |
| Elfn1 | ENSRNOT00000033551 | 15,162,088 | INTRONIC   | T | G | - | - |
| Elfn1 | ENSRNOT00000033551 | 15,163,309 | INTRONIC   | C | G | - | - |
| Elfn1 | ENSRNOT00000033551 | 15,163,492 | INTRONIC   | T | C | - | - |
| Elfn1 | ENSRNOT00000033551 | 15,163,925 | INTRONIC   | G | A | - | - |
| Elfn1 | ENSRNOT00000033551 | 15,164,088 | INTRONIC   | G | A | - | - |
| Elfn1 | ENSRNOT00000033551 | 15,165,016 | INTRONIC   | G | A | - | - |
| Elfn1 | ENSRNOT00000033551 | 15,165,134 | INTRONIC   | C | G | - | - |
| Elfn1 | ENSRNOT00000033551 | 15,165,208 | INTRONIC   | A | G | - | - |
| Elfn1 | ENSRNOT00000033551 | 15,165,452 | INTRONIC   | A | G | - | - |
| Elfn1 | ENSRNOT00000033551 | 15,166,163 | INTRONIC   | G | C | - | - |
| Elfn1 | ENSRNOT00000033551 | 15,166,360 | INTRONIC   | T | C | - | - |
| Elfn1 | ENSRNOT00000033551 | 15,166,364 | INTRONIC   | T | C | - | - |
| Elfn1 | ENSRNOT00000033551 | 15,167,407 | INTRONIC   | C | T | - | - |
| Elfn1 | ENSRNOT00000033551 | 15,167,496 | INTRONIC   | G | A | - | - |
| Elfn1 | ENSRNOT00000033551 | 15,168,433 | INTRONIC   | G | C | - | - |
| Elfn1 | ENSRNOT00000033551 | 15,169,161 | INTRONIC   | C | G | - | - |
| Elfn1 | ENSRNOT00000033551 | 15,169,177 | INTRONIC   | T | G | - | - |
| Elfn1 | ENSRNOT00000033551 | 15,169,235 | INTRONIC   | C | G | - | - |
| Elfn1 | ENSRNOT00000033551 | 15,169,236 | INTRONIC   | A | T | - | - |
| Elfn1 | ENSRNOT00000033551 | 15,169,613 | INTRONIC   | T | G | - | - |
| Elfn1 | ENSRNOT00000033551 | 15,169,958 | INTRONIC   | A | C | - | - |
| Elfn1 | ENSRNOT00000033551 | 15,170,087 | INTRONIC   | A | T | - | - |
| Elfn1 | ENSRNOT00000033551 | 15,170,897 | INTRONIC   | T | C | - | - |
| Elfn1 | ENSRNOT00000033551 | 15,170,965 | INTRONIC   | A | G | - | - |
| Elfn1 | ENSRNOT00000033551 | 15,171,552 | INTRONIC   | G | A | - | - |
| Elfn1 | ENSRNOT00000033551 | 15,172,103 | INTRONIC   | A | G | - | - |
| Elfn1 | ENSRNOT00000033551 | 15,172,248 | INTRONIC   | T | C | - | - |
| Elfn1 | ENSRNOT00000033551 | 15,172,289 | INTRONIC   | C | T | - | - |
| Elfn1 | ENSRNOT00000033551 | 15,172,319 | INTRONIC   | T | G | - | - |
| Elfn1 | ENSRNOT00000033551 | 15,172,372 | INTRONIC   | G | T | - | - |
| Elfn1 | ENSRNOT00000033551 | 15,172,451 | INTRONIC   | T | G | - | - |
| Elfn1 | ENSRNOT00000033551 | 15,172,465 | INTRONIC   | T | C | - | - |
| Elfn1 | ENSRNOT00000033551 | 15,172,512 | INTRONIC   | T | C | - | - |
| Elfn1 | ENSRNOT00000033551 | 15,172,554 | INTRONIC   | C | T | - | - |
| Elfn1 | ENSRNOT00000033551 | 15,172,704 | INTRONIC   | T | C | - | - |
| Elfn1 | ENSRNOT00000033551 | 15,172,852 | INTRONIC   | T | C | - | - |
| Elfn1 | ENSRNOT00000033551 | 15,173,029 | INTRONIC   | G | A | - | - |
| Elfn1 | ENSRNOT00000033551 | 15,173,563 | INTRONIC   | G | A | - | - |
| Elfn1 | ENSRNOT00000033551 | 15,173,809 | INTRONIC   | G | T | - | - |
| Elfn1 | ENSRNOT00000033551 | 15,173,826 | INTRONIC   | C | G | - | - |
| Elfn1 | ENSRNOT00000033551 | 15,173,909 | INTRONIC   | C | T | - | - |
| Elfn1 | ENSRNOT00000033551 | 15,175,154 | INTRONIC   | C | T | - | - |
| Elfn1 | ENSRNOT00000033551 | 15,175,155 | INTRONIC   | A | G | - | - |
| Elfn1 | ENSRNOT00000033551 | 15,175,856 | INTRONIC   | A | T | - | - |
| Elfn1 | ENSRNOT00000033551 | 15,176,223 | INTRONIC   | C | T | - | - |
| Elfn1 | ENSRNOT00000033551 | 15,176,276 | INTRONIC   | C | T | - | - |
| Elfn1 | ENSRNOT00000033551 | 15,176,390 | INTRONIC   | G | A | - | - |
| Elfn1 | ENSRNOT00000033551 | 15,176,751 | INTRONIC   | G | A | - | - |
| Elfn1 | ENSRNOT00000033551 | 15,177,890 | INTRONIC   | T | C | - | - |
| Elfn1 | ENSRNOT00000033551 | 15,177,898 | INTRONIC   | A | G | - | - |
| Elfn1 | ENSRNOT00000033551 | 15,178,313 | INTRONIC   | A | G | - | - |
| Elfn1 | ENSRNOT00000033551 | 15,179,121 | INTRONIC   | T | C | - | - |
| Elfn1 | ENSRNOT00000033551 | 15,179,328 | INTRONIC   | C | T | - | - |
| Elfn1 | ENSRNOT00000033551 | 15,179,636 | INTRONIC   | T | C | - | - |
| Elfn1 | ENSRNOT00000033551 | 15,179,649 | INTRONIC   | G | A | - | - |
| Elfn1 | ENSRNOT00000033551 | 15,179,712 | INTRONIC   | G | T | - | - |
| Elfn1 | ENSRNOT00000033551 | 15,180,170 | INTRONIC   | A | G | - | - |
| Elfn1 | ENSRNOT00000033551 | 15,180,243 | INTRONIC   | G | A | - | - |
| Elfn1 | ENSRNOT00000033551 | 15,180,961 | INTRONIC   | G | A | - | - |
| Elfn1 | ENSRNOT00000033551 | 15,181,666 | INTRONIC   | A | G | - | - |
| Elfn1 | ENSRNOT00000033551 | 15,185,395 | INTRONIC   | T | C | - | - |
| Elfn1 | ENSRNOT00000033551 | 15,186,718 | INTRONIC   | A | G | - | - |
| Elfn1 | ENSRNOT00000033551 | 15,190,090 | INTRONIC   | A | C | - | - |
| Elfn1 | ENSRNOT00000033551 | 15,190,420 | INTRONIC   | G | A | - | - |
| Elfn1 | ENSRNOT00000033551 | 15,192,803 | INTRONIC   | C | G | - | - |
| Elfn1 | ENSRNOT00000033551 | 15,192,809 | INTRONIC   | C | G | - | - |
| Elfn1 | ENSRNOT00000033551 | 15,198,531 | INTRONIC   | A | G | - | - |
| Elfn1 | ENSRNOT00000033551 | 15,203,189 | UPSTREAM   | A | G | - | - |
| Elfn1 | ENSRNOT00000033551 | 15,206,218 | UPSTREAM   | A | C | - | - |
| Elfn1 | ENSRNOT00000033551 | 15,206,282 | UPSTREAM   | G | C | - | - |
| -     | -                  | 15,206,450 | INTERGENIC | T | C | - | - |
| -     | -                  | 15,206,533 | INTERGENIC | G | C | - | - |
| -     | -                  | 15,206,810 | INTERGENIC | T | G | - | - |
| -     | -                  | 15,207,102 | INTERGENIC | G | C | - | - |
| -     | -                  | 15,207,155 | INTERGENIC | C | T | - | - |
| -     | -                  | 15,207,160 | INTERGENIC | A | G | - | - |
| -     | -                  | 15,210,120 | INTERGENIC | T | C | - | - |

|   |            |            |   |   |   |   |
|---|------------|------------|---|---|---|---|
| - | 15,210,995 | INTERGENIC | C | T | - | - |
| - | 15,211,184 | INTERGENIC | G | A | - | - |
| - | 15,211,215 | INTERGENIC | G | A | - | - |
| - | 15,211,265 | INTERGENIC | C | G | - | - |
| - | 15,211,293 | INTERGENIC | A | G | - | - |
| - | 15,211,327 | INTERGENIC | G | A | - | - |
| - | 15,211,398 | INTERGENIC | A | G | - | - |
| - | 15,211,407 | INTERGENIC | T | C | - | - |
| - | 15,212,324 | INTERGENIC | G | A | - | - |
| - | 15,212,758 | INTERGENIC | C | T | - | - |
| - | 15,213,027 | INTERGENIC | G | A | - | - |
| - | 15,214,381 | INTERGENIC | A | G | - | - |
| - | 15,214,489 | INTERGENIC | A | G | - | - |
| - | 15,215,498 | INTERGENIC | G | A | - | - |
| - | 15,215,994 | INTERGENIC | G | A | - | - |
| - | 15,216,133 | INTERGENIC | A | G | - | - |
| - | 15,216,136 | INTERGENIC | A | T | - | - |
| - | 15,216,213 | INTERGENIC | C | G | - | - |
| - | 15,216,665 | INTERGENIC | T | C | - | - |
| - | 15,216,672 | INTERGENIC | G | A | - | - |
| - | 15,216,829 | INTERGENIC | C | T | - | - |
| - | 15,216,881 | INTERGENIC | T | C | - | - |
| - | 15,217,031 | INTERGENIC | C | A | - | - |
| - | 15,217,453 | INTERGENIC | C | T | - | - |
| - | 15,218,003 | INTERGENIC | G | A | - | - |
| - | 15,218,058 | INTERGENIC | A | G | - | - |
| - | 15,218,077 | INTERGENIC | C | T | - | - |
| - | 15,218,427 | INTERGENIC | C | T | - | - |
| - | 15,219,530 | INTERGENIC | A | G | - | - |
| - | 15,219,636 | INTERGENIC | C | T | - | - |
| - | 15,220,478 | INTERGENIC | C | G | - | - |
| - | 15,220,631 | INTERGENIC | T | C | - | - |
| - | 15,220,658 | INTERGENIC | G | A | - | - |
| - | 15,221,058 | INTERGENIC | C | T | - | - |
| - | 15,221,120 | INTERGENIC | T | C | - | - |
| - | 15,221,214 | INTERGENIC | A | G | - | - |
| - | 15,221,463 | INTERGENIC | T | C | - | - |
| - | 15,222,075 | INTERGENIC | T | A | - | - |
| - | 15,222,193 | INTERGENIC | A | G | - | - |
| - | 15,222,303 | INTERGENIC | A | G | - | - |
| - | 15,222,755 | INTERGENIC | T | G | - | - |
| - | 15,223,047 | INTERGENIC | G | A | - | - |
| - | 15,223,527 | INTERGENIC | T | C | - | - |
| - | 15,223,530 | INTERGENIC | A | G | - | - |
| - | 15,223,938 | INTERGENIC | T | G | - | - |
| - | 15,223,939 | INTERGENIC | T | G | - | - |
| - | 15,223,991 | INTERGENIC | G | A | - | - |
| - | 15,224,800 | INTERGENIC | C | T | - | - |
| - | 15,224,897 | INTERGENIC | C | G | - | - |
| - | 15,224,967 | INTERGENIC | T | C | - | - |
| - | 15,225,127 | INTERGENIC | G | A | - | - |
| - | 15,225,188 | INTERGENIC | C | G | - | - |
| - | 15,225,250 | INTERGENIC | T | C | - | - |
| - | 15,225,335 | INTERGENIC | A | G | - | - |
| - | 15,225,408 | INTERGENIC | G | T | - | - |
| - | 15,225,446 | INTERGENIC | T | C | - | - |
| - | 15,225,509 | INTERGENIC | A | G | - | - |
| - | 15,225,537 | INTERGENIC | A | G | - | - |
| - | 15,225,624 | INTERGENIC | G | A | - | - |
| - | 15,225,728 | INTERGENIC | G | A | - | - |
| - | 15,226,046 | INTERGENIC | T | A | - | - |
| - | 15,226,189 | INTERGENIC | C | T | - | - |
| - | 15,226,275 | INTERGENIC | A | C | - | - |
| - | 15,226,451 | INTERGENIC | G | C | - | - |
| - | 15,226,454 | INTERGENIC | G | A | - | - |
| - | 15,226,482 | INTERGENIC | C | T | - | - |
| - | 15,226,558 | INTERGENIC | T | C | - | - |
| - | 15,226,577 | INTERGENIC | G | C | - | - |
| - | 15,226,608 | INTERGENIC | C | T | - | - |
| - | 15,226,644 | INTERGENIC | C | T | - | - |
| - | 15,226,648 | INTERGENIC | G | A | - | - |
| - | 15,227,073 | INTERGENIC | C | G | - | - |
| - | 15,227,195 | INTERGENIC | C | A | - | - |
| - | 15,227,260 | INTERGENIC | C | T | - | - |
| - | 15,227,643 | INTERGENIC | C | A | - | - |
| - | 15,227,744 | INTERGENIC | G | A | - | - |
| - | 15,228,332 | INTERGENIC | G | A | - | - |
| - | 15,228,577 | INTERGENIC | G | A | - | - |
| - | 15,228,627 | INTERGENIC | G | T | - | - |
| - | 15,228,635 | INTERGENIC | G | T | - | - |

|   |            |            |   |   |   |   |
|---|------------|------------|---|---|---|---|
| - | 15,228,763 | INTERGENIC | C | G | - | - |
| - | 15,228,778 | INTERGENIC | T | C | - | - |
| - | 15,229,113 | INTERGENIC | C | T | - | - |
| - | 15,229,135 | INTERGENIC | G | A | - | - |
| - | 15,229,195 | INTERGENIC | T | A | - | - |
| - | 15,229,320 | INTERGENIC | C | A | - | - |
| - | 15,229,425 | INTERGENIC | T | A | - | - |
| - | 15,229,426 | INTERGENIC | G | A | - | - |
| - | 15,229,842 | INTERGENIC | C | T | - | - |
| - | 15,229,855 | INTERGENIC | A | G | - | - |
| - | 15,229,877 | INTERGENIC | T | C | - | - |
| - | 15,230,250 | INTERGENIC | T | C | - | - |
| - | 15,230,300 | INTERGENIC | C | A | - | - |
| - | 15,230,392 | INTERGENIC | C | G | - | - |
| - | 15,230,609 | INTERGENIC | A | G | - | - |
| - | 15,230,623 | INTERGENIC | T | C | - | - |
| - | 15,230,742 | INTERGENIC | C | A | - | - |
| - | 15,230,840 | INTERGENIC | A | C | - | - |
| - | 15,230,981 | INTERGENIC | G | A | - | - |
| - | 15,231,065 | INTERGENIC | T | C | - | - |
| - | 15,231,284 | INTERGENIC | A | C | - | - |
| - | 15,231,393 | INTERGENIC | G | T | - | - |
| - | 15,231,583 | INTERGENIC | G | C | - | - |
| - | 15,231,886 | INTERGENIC | C | T | - | - |
| - | 15,231,887 | INTERGENIC | T | A | - | - |
| - | 15,232,147 | INTERGENIC | G | A | - | - |
| - | 15,232,228 | INTERGENIC | A | G | - | - |
| - | 15,232,250 | INTERGENIC | G | T | - | - |
| - | 15,232,410 | INTERGENIC | T | C | - | - |
| - | 15,232,421 | INTERGENIC | T | C | - | - |
| - | 15,232,449 | INTERGENIC | A | C | - | - |
| - | 15,232,482 | INTERGENIC | T | C | - | - |
| - | 15,232,574 | INTERGENIC | T | C | - | - |
| - | 15,232,575 | INTERGENIC | T | C | - | - |
| - | 15,232,652 | INTERGENIC | G | A | - | - |
| - | 15,232,698 | INTERGENIC | T | C | - | - |
| - | 15,232,711 | INTERGENIC | A | G | - | - |
| - | 15,232,749 | INTERGENIC | G | C | - | - |
| - | 15,232,837 | INTERGENIC | C | A | - | - |
| - | 15,232,838 | INTERGENIC | C | T | - | - |
| - | 15,232,952 | INTERGENIC | C | A | - | - |
| - | 15,233,060 | INTERGENIC | G | A | - | - |
| - | 15,233,205 | INTERGENIC | A | G | - | - |
| - | 15,233,214 | INTERGENIC | G | A | - | - |
| - | 15,233,252 | INTERGENIC | T | C | - | - |
| - | 15,233,270 | INTERGENIC | A | G | - | - |
| - | 15,233,332 | INTERGENIC | C | T | - | - |
| - | 15,233,523 | INTERGENIC | T | C | - | - |
| - | 15,233,884 | INTERGENIC | G | A | - | - |
| - | 15,234,179 | INTERGENIC | A | G | - | - |
| - | 15,234,217 | INTERGENIC | T | C | - | - |
| - | 15,234,365 | INTERGENIC | T | C | - | - |
| - | 15,234,897 | INTERGENIC | G | T | - | - |
| - | 15,234,948 | INTERGENIC | G | A | - | - |
| - | 15,235,360 | INTERGENIC | C | T | - | - |
| - | 15,235,366 | INTERGENIC | G | A | - | - |
| - | 15,236,053 | INTERGENIC | A | G | - | - |
| - | 15,236,071 | INTERGENIC | G | A | - | - |
| - | 15,236,122 | INTERGENIC | C | T | - | - |
| - | 15,236,124 | INTERGENIC | T | G | - | - |
| - | 15,236,155 | INTERGENIC | T | C | - | - |
| - | 15,236,159 | INTERGENIC | A | G | - | - |
| - | 15,236,352 | INTERGENIC | A | G | - | - |
| - | 15,236,470 | INTERGENIC | A | C | - | - |
| - | 15,236,553 | INTERGENIC | C | T | - | - |
| - | 15,236,571 | INTERGENIC | T | A | - | - |
| - | 15,236,618 | INTERGENIC | T | C | - | - |
| - | 15,236,929 | INTERGENIC | G | A | - | - |
| - | 15,236,931 | INTERGENIC | A | G | - | - |
| - | 15,236,984 | INTERGENIC | C | G | - | - |
| - | 15,237,044 | INTERGENIC | G | A | - | - |
| - | 15,237,078 | INTERGENIC | A | G | - | - |
| - | 15,237,158 | INTERGENIC | T | C | - | - |
| - | 15,237,196 | INTERGENIC | C | T | - | - |
| - | 15,237,248 | INTERGENIC | C | G | - | - |
| - | 15,237,275 | INTERGENIC | C | T | - | - |
| - | 15,237,313 | INTERGENIC | G | A | - | - |
| - | 15,237,610 | INTERGENIC | G | C | - | - |
| - | 15,237,766 | INTERGENIC | A | G | - | - |
| - | 15,237,786 | INTERGENIC | G | A | - | - |



|   |            |            |   |   |   |   |
|---|------------|------------|---|---|---|---|
| - | 15,238,271 | INTERGENIC | A | G | - | - |
| - | 15,238,427 | INTERGENIC | A | G | - | - |
| - | 15,238,484 | INTERGENIC | G | A | - | - |
| - | 15,238,641 | INTERGENIC | T | A | - | - |
| - | 15,238,720 | INTERGENIC | T | C | - | - |
| - | 15,238,759 | INTERGENIC | A | G | - | - |
| - | 15,238,775 | INTERGENIC | C | T | - | - |
| - | 15,238,813 | INTERGENIC | G | A | - | - |
| - | 15,238,948 | INTERGENIC | T | G | - | - |
| - | 15,238,995 | INTERGENIC | C | T | - | - |
| - | 15,239,019 | INTERGENIC | A | C | - | - |
| - | 15,239,078 | INTERGENIC | T | C | - | - |
| - | 15,239,154 | INTERGENIC | G | C | - | - |
| - | 15,239,165 | INTERGENIC | T | C | - | - |
| - | 15,239,322 | INTERGENIC | A | G | - | - |
| - | 15,239,324 | INTERGENIC | G | T | - | - |
| - | 15,239,337 | INTERGENIC | G | A | - | - |
| - | 15,239,453 | INTERGENIC | C | A | - | - |
| - | 15,239,470 | INTERGENIC | C | T | - | - |
| - | 15,239,562 | INTERGENIC | C | T | - | - |
| - | 15,239,563 | INTERGENIC | C | T | - | - |
| - | 15,239,714 | INTERGENIC | G | A | - | - |
| - | 15,239,848 | INTERGENIC | G | A | - | - |
| - | 15,239,964 | INTERGENIC | T | G | - | - |
| - | 15,240,182 | INTERGENIC | A | G | - | - |
| - | 15,240,222 | INTERGENIC | A | G | - | - |
| - | 15,240,298 | INTERGENIC | T | C | - | - |
| - | 15,240,328 | INTERGENIC | T | C | - | - |
| - | 15,240,329 | INTERGENIC | T | C | - | - |
| - | 15,240,599 | INTERGENIC | C | T | - | - |
| - | 15,240,606 | INTERGENIC | G | A | - | - |
| - | 15,240,755 | INTERGENIC | T | C | - | - |
| - | 15,240,909 | INTERGENIC | T | C | - | - |
| - | 15,240,965 | INTERGENIC | C | T | - | - |
| - | 15,240,975 | INTERGENIC | T | C | - | - |
| - | 15,241,042 | INTERGENIC | T | C | - | - |
| - | 15,241,092 | INTERGENIC | C | T | - | - |
| - | 15,241,189 | INTERGENIC | G | A | - | - |
| - | 15,241,239 | INTERGENIC | A | G | - | - |
| - | 15,241,352 | INTERGENIC | G | C | - | - |
| - | 15,241,373 | INTERGENIC | G | C | - | - |
| - | 15,241,613 | INTERGENIC | G | A | - | - |
| - | 15,241,687 | INTERGENIC | G | A | - | - |
| - | 15,242,064 | INTERGENIC | C | T | - | - |
| - | 15,242,243 | INTERGENIC | G | A | - | - |
| - | 15,242,347 | INTERGENIC | A | C | - | - |
| - | 15,242,359 | INTERGENIC | C | G | - | - |
| - | 15,242,392 | INTERGENIC | A | T | - | - |
| - | 15,242,422 | INTERGENIC | A | G | - | - |
| - | 15,242,520 | INTERGENIC | G | A | - | - |
| - | 15,242,546 | INTERGENIC | A | G | - | - |
| - | 15,242,582 | INTERGENIC | C | G | - | - |
| - | 15,242,631 | INTERGENIC | T | C | - | - |
| - | 15,242,791 | INTERGENIC | T | G | - | - |
| - | 15,242,912 | INTERGENIC | C | T | - | - |
| - | 15,242,957 | INTERGENIC | A | T | - | - |
| - | 15,242,975 | INTERGENIC | G | C | - | - |
| - | 15,243,204 | INTERGENIC | A | G | - | - |
| - | 15,243,239 | INTERGENIC | T | C | - | - |
| - | 15,243,279 | INTERGENIC | G | A | - | - |
| - | 15,243,300 | INTERGENIC | A | G | - | - |
| - | 15,243,334 | INTERGENIC | G | A | - | - |
| - | 15,243,355 | INTERGENIC | C | A | - | - |
| - | 15,243,491 | INTERGENIC | C | A | - | - |
| - | 15,243,596 | INTERGENIC | C | G | - | - |
| - | 15,243,811 | INTERGENIC | G | T | - | - |
| - | 15,243,838 | INTERGENIC | C | A | - | - |
| - | 15,243,866 | INTERGENIC | G | A | - | - |
| - | 15,243,869 | INTERGENIC | T | C | - | - |
| - | 15,243,900 | INTERGENIC | T | C | - | - |
| - | 15,243,938 | INTERGENIC | G | A | - | - |
| - | 15,244,056 | INTERGENIC | G | A | - | - |
| - | 15,244,162 | INTERGENIC | C | T | - | - |
| - | 15,244,288 | INTERGENIC | G | C | - | - |
| - | 15,244,309 | INTERGENIC | A | G | - | - |
| - | 15,244,408 | INTERGENIC | G | A | - | - |
| - | 15,244,591 | INTERGENIC | C | T | - | - |
| - | 15,244,728 | INTERGENIC | T | G | - | - |
| - | 15,244,774 | INTERGENIC | T | C | - | - |
| - | 15,244,820 | INTERGENIC | G | C | - | - |

|   |            |            |   |   |   |   |
|---|------------|------------|---|---|---|---|
| - | 15,245,199 | INTERGENIC | C | G | - | - |
| - | 15,245,215 | INTERGENIC | C | T | - | - |
| - | 15,245,221 | INTERGENIC | C | T | - | - |
| - | 15,245,301 | INTERGENIC | G | A | - | - |
| - | 15,245,492 | INTERGENIC | T | C | - | - |
| - | 15,245,522 | INTERGENIC | G | C | - | - |
| - | 15,245,662 | INTERGENIC | T | C | - | - |
| - | 15,245,673 | INTERGENIC | A | C | - | - |
| - | 15,245,682 | INTERGENIC | A | G | - | - |
| - | 15,245,738 | INTERGENIC | G | A | - | - |
| - | 15,245,739 | INTERGENIC | A | G | - | - |
| - | 15,245,771 | INTERGENIC | G | A | - | - |
| - | 15,245,873 | INTERGENIC | C | T | - | - |
| - | 15,246,074 | INTERGENIC | G | A | - | - |
| - | 15,246,115 | INTERGENIC | C | T | - | - |
| - | 15,246,129 | INTERGENIC | T | C | - | - |
| - | 15,246,728 | INTERGENIC | G | T | - | - |
| - | 15,246,779 | INTERGENIC | A | G | - | - |
| - | 15,246,920 | INTERGENIC | C | T | - | - |
| - | 15,247,108 | INTERGENIC | G | A | - | - |
| - | 15,247,172 | INTERGENIC | T | A | - | - |
| - | 15,247,300 | INTERGENIC | T | G | - | - |
| - | 15,247,409 | INTERGENIC | A | G | - | - |
| - | 15,247,431 | INTERGENIC | A | G | - | - |
| - | 15,247,435 | INTERGENIC | C | T | - | - |
| - | 15,247,568 | INTERGENIC | G | A | - | - |
| - | 15,247,878 | INTERGENIC | A | C | - | - |
| - | 15,247,899 | INTERGENIC | A | G | - | - |
| - | 15,247,901 | INTERGENIC | A | G | - | - |
| - | 15,247,913 | INTERGENIC | G | A | - | - |
| - | 15,247,926 | INTERGENIC | C | T | - | - |
| - | 15,247,936 | INTERGENIC | A | G | - | - |
| - | 15,247,939 | INTERGENIC | G | A | - | - |
| - | 15,248,105 | INTERGENIC | C | T | - | - |
| - | 15,248,128 | INTERGENIC | A | C | - | - |
| - | 15,248,548 | INTERGENIC | A | G | - | - |
| - | 15,248,549 | INTERGENIC | T | C | - | - |
| - | 15,248,661 | INTERGENIC | G | T | - | - |
| - | 15,248,674 | INTERGENIC | C | T | - | - |
| - | 15,248,718 | INTERGENIC | C | T | - | - |
| - | 15,248,868 | INTERGENIC | T | A | - | - |
| - | 15,248,977 | INTERGENIC | G | A | - | - |
| - | 15,248,993 | INTERGENIC | A | G | - | - |
| - | 15,249,053 | INTERGENIC | A | G | - | - |
| - | 15,249,204 | INTERGENIC | A | T | - | - |
| - | 15,249,218 | INTERGENIC | G | A | - | - |
| - | 15,249,285 | INTERGENIC | C | G | - | - |
| - | 15,249,411 | INTERGENIC | C | T | - | - |
| - | 15,249,442 | INTERGENIC | T | C | - | - |
| - | 15,249,509 | INTERGENIC | A | G | - | - |
| - | 15,249,510 | INTERGENIC | C | T | - | - |
| - | 15,249,558 | INTERGENIC | A | G | - | - |
| - | 15,249,569 | INTERGENIC | T | C | - | - |
| - | 15,249,711 | INTERGENIC | A | G | - | - |
| - | 15,249,970 | INTERGENIC | G | A | - | - |
| - | 15,250,103 | INTERGENIC | T | A | - | - |
| - | 15,250,143 | INTERGENIC | G | A | - | - |
| - | 15,250,164 | INTERGENIC | T | C | - | - |
| - | 15,250,306 | INTERGENIC | G | A | - | - |
| - | 15,250,368 | INTERGENIC | G | A | - | - |
| - | 15,250,381 | INTERGENIC | T | C | - | - |
| - | 15,250,404 | INTERGENIC | C | T | - | - |
| - | 15,250,405 | INTERGENIC | A | G | - | - |
| - | 15,250,440 | INTERGENIC | C | T | - | - |
| - | 15,250,943 | INTERGENIC | C | G | - | - |
| - | 15,250,968 | INTERGENIC | G | A | - | - |
| - | 15,250,987 | INTERGENIC | G | A | - | - |
| - | 15,251,007 | INTERGENIC | A | T | - | - |
| - | 15,251,120 | INTERGENIC | G | T | - | - |
| - | 15,251,331 | INTERGENIC | T | C | - | - |
| - | 15,251,387 | INTERGENIC | G | T | - | - |
| - | 15,251,681 | INTERGENIC | G | A | - | - |
| - | 15,251,715 | INTERGENIC | T | A | - | - |
| - | 15,251,745 | INTERGENIC | G | A | - | - |
| - | 15,251,874 | INTERGENIC | T | C | - | - |
| - | 15,251,894 | INTERGENIC | G | A | - | - |
| - | 15,252,305 | INTERGENIC | C | T | - | - |
| - | 15,252,313 | INTERGENIC | C | T | - | - |
| - | 15,252,321 | INTERGENIC | G | A | - | - |
| - | 15,252,373 | INTERGENIC | A | G | - | - |

|   |            |            |   |   |   |   |
|---|------------|------------|---|---|---|---|
| - | 15,252,489 | INTERGENIC | T | C | - | - |
| - | 15,252,502 | INTERGENIC | T | C | - | - |
| - | 15,252,519 | INTERGENIC | T | C | - | - |
| - | 15,252,560 | INTERGENIC | A | G | - | - |
| - | 15,252,680 | INTERGENIC | T | C | - | - |
| - | 15,252,918 | INTERGENIC | C | T | - | - |
| - | 15,252,928 | INTERGENIC | C | G | - | - |
| - | 15,253,190 | INTERGENIC | C | T | - | - |
| - | 15,253,247 | INTERGENIC | G | A | - | - |
| - | 15,253,570 | INTERGENIC | C | T | - | - |
| - | 15,253,665 | INTERGENIC | T | C | - | - |
| - | 15,253,781 | INTERGENIC | G | T | - | - |
| - | 15,253,831 | INTERGENIC | A | G | - | - |
| - | 15,253,914 | INTERGENIC | C | T | - | - |
| - | 15,253,915 | INTERGENIC | A | G | - | - |
| - | 15,253,937 | INTERGENIC | T | C | - | - |
| - | 15,254,008 | INTERGENIC | G | A | - | - |
| - | 15,254,156 | INTERGENIC | C | A | - | - |
| - | 15,254,164 | INTERGENIC | G | T | - | - |
| - | 15,254,235 | INTERGENIC | G | T | - | - |
| - | 15,254,352 | INTERGENIC | G | C | - | - |
| - | 15,254,405 | INTERGENIC | G | A | - | - |
| - | 15,254,680 | INTERGENIC | C | T | - | - |
| - | 15,254,703 | INTERGENIC | C | T | - | - |
| - | 15,254,726 | INTERGENIC | G | T | - | - |
| - | 15,254,939 | INTERGENIC | A | G | - | - |
| - | 15,255,011 | INTERGENIC | A | G | - | - |
| - | 15,255,178 | INTERGENIC | C | T | - | - |
| - | 15,255,494 | INTERGENIC | C | T | - | - |
| - | 15,255,512 | INTERGENIC | C | T | - | - |
| - | 15,255,513 | INTERGENIC | C | T | - | - |
| - | 15,255,514 | INTERGENIC | C | T | - | - |
| - | 15,255,539 | INTERGENIC | A | G | - | - |
| - | 15,255,868 | INTERGENIC | G | T | - | - |
| - | 15,256,158 | INTERGENIC | G | T | - | - |
| - | 15,256,484 | INTERGENIC | G | A | - | - |
| - | 15,256,531 | INTERGENIC | T | G | - | - |
| - | 15,256,584 | INTERGENIC | T | C | - | - |
| - | 15,256,591 | INTERGENIC | C | T | - | - |
| - | 15,256,634 | INTERGENIC | A | G | - | - |
| - | 15,256,817 | INTERGENIC | G | A | - | - |
| - | 15,257,198 | INTERGENIC | T | C | - | - |
| - | 15,257,204 | INTERGENIC | A | G | - | - |
| - | 15,257,257 | INTERGENIC | C | T | - | - |
| - | 15,257,407 | INTERGENIC | A | T | - | - |
| - | 15,257,423 | INTERGENIC | A | G | - | - |
| - | 15,257,457 | INTERGENIC | A | G | - | - |
| - | 15,257,607 | INTERGENIC | G | A | - | - |
| - | 15,257,640 | INTERGENIC | T | C | - | - |
| - | 15,257,704 | INTERGENIC | G | A | - | - |
| - | 15,257,706 | INTERGENIC | G | C | - | - |
| - | 15,257,903 | INTERGENIC | G | T | - | - |
| - | 15,257,944 | INTERGENIC | G | A | - | - |
| - | 15,257,952 | INTERGENIC | C | T | - | - |
| - | 15,257,983 | INTERGENIC | T | C | - | - |
| - | 15,257,990 | INTERGENIC | A | G | - | - |
| - | 15,258,042 | INTERGENIC | G | A | - | - |
| - | 15,258,176 | INTERGENIC | G | A | - | - |
| - | 15,258,243 | INTERGENIC | C | T | - | - |
| - | 15,258,333 | INTERGENIC | C | T | - | - |
| - | 15,258,354 | INTERGENIC | C | A | - | - |
| - | 15,258,536 | INTERGENIC | A | G | - | - |
| - | 15,259,132 | INTERGENIC | G | C | - | - |
| - | 15,259,185 | INTERGENIC | G | C | - | - |
| - | 15,259,711 | INTERGENIC | C | G | - | - |
| - | 15,259,758 | INTERGENIC | G | A | - | - |
| - | 15,260,142 | INTERGENIC | A | G | - | - |
| - | 15,260,163 | INTERGENIC | C | A | - | - |
| - | 15,260,292 | INTERGENIC | C | T | - | - |
| - | 15,260,357 | INTERGENIC | A | G | - | - |
| - | 15,260,551 | INTERGENIC | A | G | - | - |
| - | 15,260,743 | INTERGENIC | T | A | - | - |
| - | 15,261,257 | INTERGENIC | T | C | - | - |
| - | 15,261,387 | INTERGENIC | A | G | - | - |
| - | 15,261,427 | INTERGENIC | T | C | - | - |
| - | 15,261,472 | INTERGENIC | A | G | - | - |
| - | 15,261,483 | INTERGENIC | G | A | - | - |
| - | 15,261,524 | INTERGENIC | G | A | - | - |
| - | 15,261,527 | INTERGENIC | G | A | - | - |
| - | 15,261,742 | INTERGENIC | A | G | - | - |

|   |            |            |   |   |   |   |
|---|------------|------------|---|---|---|---|
| - | 15,261,756 | INTERGENIC | C | T | - | - |
| - | 15,261,757 | INTERGENIC | A | G | - | - |
| - | 15,261,918 | INTERGENIC | G | A | - | - |
| - | 15,261,956 | INTERGENIC | G | T | - | - |
| - | 15,261,965 | INTERGENIC | T | C | - | - |
| - | 15,262,017 | INTERGENIC | A | G | - | - |
| - | 15,262,048 | INTERGENIC | C | A | - | - |
| - | 15,262,595 | INTERGENIC | A | G | - | - |
| - | 15,262,610 | INTERGENIC | G | A | - | - |
| - | 15,262,676 | INTERGENIC | G | A | - | - |
| - | 15,262,717 | INTERGENIC | T | C | - | - |
| - | 15,263,095 | INTERGENIC | A | G | - | - |
| - | 15,263,202 | INTERGENIC | C | T | - | - |
| - | 15,263,360 | INTERGENIC | A | G | - | - |
| - | 15,263,626 | INTERGENIC | G | A | - | - |
| - | 15,264,154 | INTERGENIC | T | A | - | - |
| - | 15,264,416 | INTERGENIC | G | A | - | - |
| - | 15,264,440 | INTERGENIC | C | T | - | - |
| - | 15,264,539 | INTERGENIC | G | T | - | - |
| - | 15,264,567 | INTERGENIC | G | A | - | - |
| - | 15,264,582 | INTERGENIC | T | C | - | - |
| - | 15,264,594 | INTERGENIC | G | A | - | - |
| - | 15,264,773 | INTERGENIC | C | T | - | - |
| - | 15,265,165 | INTERGENIC | A | G | - | - |
| - | 15,265,508 | INTERGENIC | T | C | - | - |
| - | 15,265,515 | INTERGENIC | C | T | - | - |
| - | 15,265,548 | INTERGENIC | C | T | - | - |
| - | 15,265,611 | INTERGENIC | C | T | - | - |
| - | 15,265,791 | INTERGENIC | C | G | - | - |
| - | 15,266,223 | INTERGENIC | A | G | - | - |
| - | 15,266,293 | INTERGENIC | C | T | - | - |
| - | 15,266,544 | INTERGENIC | C | T | - | - |
| - | 15,266,646 | INTERGENIC | G | A | - | - |
| - | 15,266,816 | INTERGENIC | T | C | - | - |
| - | 15,267,084 | INTERGENIC | G | A | - | - |
| - | 15,267,294 | INTERGENIC | C | T | - | - |
| - | 15,267,321 | INTERGENIC | C | T | - | - |
| - | 15,267,450 | INTERGENIC | C | T | - | - |
| - | 15,267,554 | INTERGENIC | T | C | - | - |
| - | 15,267,609 | INTERGENIC | C | A | - | - |
| - | 15,267,632 | INTERGENIC | T | C | - | - |
| - | 15,267,687 | INTERGENIC | C | T | - | - |
| - | 15,267,792 | INTERGENIC | A | C | - | - |
| - | 15,267,911 | INTERGENIC | A | G | - | - |
| - | 15,267,958 | INTERGENIC | G | A | - | - |
| - | 15,268,019 | INTERGENIC | T | C | - | - |
| - | 15,268,278 | INTERGENIC | G | A | - | - |
| - | 15,268,406 | INTERGENIC | A | G | - | - |
| - | 15,268,653 | INTERGENIC | G | A | - | - |
| - | 15,269,038 | INTERGENIC | G | A | - | - |
| - | 15,269,133 | INTERGENIC | C | T | - | - |
| - | 15,269,202 | INTERGENIC | C | A | - | - |
| - | 15,269,255 | INTERGENIC | G | A | - | - |
| - | 15,269,336 | INTERGENIC | T | G | - | - |
| - | 15,269,429 | INTERGENIC | G | A | - | - |
| - | 15,269,527 | INTERGENIC | T | C | - | - |
| - | 15,269,537 | INTERGENIC | T | C | - | - |
| - | 15,269,583 | INTERGENIC | G | A | - | - |
| - | 15,271,221 | INTERGENIC | A | G | - | - |
| - | 15,271,312 | INTERGENIC | G | A | - | - |
| - | 15,271,511 | INTERGENIC | C | T | - | - |
| - | 15,271,866 | INTERGENIC | T | G | - | - |
| - | 15,271,868 | INTERGENIC | T | C | - | - |
| - | 15,272,002 | INTERGENIC | G | C | - | - |
| - | 15,272,136 | INTERGENIC | T | G | - | - |
| - | 15,272,258 | INTERGENIC | C | A | - | - |
| - | 15,272,299 | INTERGENIC | T | A | - | - |
| - | 15,272,318 | INTERGENIC | G | T | - | - |
| - | 15,272,373 | INTERGENIC | A | G | - | - |
| - | 15,272,475 | INTERGENIC | C | G | - | - |
| - | 15,273,961 | INTERGENIC | A | G | - | - |
| - | 15,274,099 | INTERGENIC | G | C | - | - |
| - | 15,274,352 | INTERGENIC | G | A | - | - |
| - | 15,274,479 | INTERGENIC | T | A | - | - |
| - | 15,274,580 | INTERGENIC | G | C | - | - |
| - | 15,274,723 | INTERGENIC | C | T | - | - |
| - | 15,274,763 | INTERGENIC | C | T | - | - |
| - | 15,274,800 | INTERGENIC | T | C | - | - |
| - | 15,274,968 | INTERGENIC | A | G | - | - |
| - | 15,275,392 | INTERGENIC | A | C | - | - |

|              |                    |            |                      |   |   |   |   |
|--------------|--------------------|------------|----------------------|---|---|---|---|
|              | -                  | 15,275,416 | INTERGENIC           | G | A | - | - |
|              | -                  | 15,275,947 | INTERGENIC           | G | A | - | - |
|              | -                  | 15,276,130 | INTERGENIC           | A | G | - | - |
|              | -                  | 15,276,303 | INTERGENIC           | A | C | - | - |
|              | -                  | 15,276,533 | INTERGENIC           | G | A | - | - |
|              | -                  | 15,276,534 | INTERGENIC           | A | G | - | - |
|              | -                  | 15,276,678 | INTERGENIC           | G | A | - | - |
|              | -                  | 15,276,692 | INTERGENIC           | G | A | - | - |
|              | -                  | 15,276,695 | INTERGENIC           | T | C | - | - |
|              | -                  | 15,276,765 | INTERGENIC           | A | G | - | - |
|              | -                  | 15,276,773 | INTERGENIC           | T | C | - | - |
|              | -                  | 15,277,576 | INTERGENIC           | C | T | - | - |
|              | -                  | 15,277,578 | INTERGENIC           | T | C | - | - |
|              | -                  | 15,277,823 | INTERGENIC           | A | T | - | - |
|              | -                  | 15,278,489 | INTERGENIC           | G | A | - | - |
|              | -                  | 15,278,650 | INTERGENIC           | C | A | - | - |
|              | -                  | 15,280,471 | INTERGENIC           | T | A | - | - |
|              | -                  | 15,280,529 | INTERGENIC           | C | T | - | - |
|              | -                  | 15,281,736 | INTERGENIC           | C | T | - | - |
| LOC100361517 | ENSRNOT00000001716 | 15,282,640 | UPSTREAM             | C | T | - | - |
| LOC100361517 | ENSRNOT00000001716 | 15,282,985 | UPSTREAM             | T | G | - | - |
| LOC100361517 | ENSRNOT00000001716 | 15,285,829 | UPSTREAM             | G | A | - | - |
| LOC100361517 | ENSRNOT00000001716 | 15,287,208 | UPSTREAM             | C | A | - | - |
| LOC100361517 | ENSRNOT00000001716 | 15,288,965 | INTRONIC             | C | T | - | - |
| LOC100361517 | ENSRNOT00000001716 | 15,289,864 | 3PRIME_UTR           | C | T | - | - |
| LOC100361517 | ENSRNOT00000001716 | 15,290,102 | DOWNSTREAM           | A | G | - | - |
| LOC100361517 | ENSRNOT00000001716 | 15,290,829 | DOWNSTREAM           | G | T | - | - |
| LOC100361517 | ENSRNOT00000001716 | 15,291,784 | DOWNSTREAM           | C | T | - | - |
| LOC100361517 | ENSRNOT00000001716 | 15,292,412 | DOWNSTREAM           | C | T | - | - |
| LOC100361517 | ENSRNOT00000001716 | 15,292,699 | DOWNSTREAM           | C | T | - | - |
| LOC100361517 | ENSRNOT00000001716 | 15,293,423 | DOWNSTREAM           | G | A | - | - |
| LOC100361517 | ENSRNOT00000001716 | 15,293,424 | DOWNSTREAM           | T | C | - | - |
| LOC100361517 | ENSRNOT00000001716 | 15,294,144 | DOWNSTREAM           | T | A | - | - |
|              | -                  | 15,295,184 | INTERGENIC           | T | C | - | - |
|              | -                  | 15,296,155 | INTERGENIC           | A | G | - | - |
|              | -                  | 15,296,311 | INTERGENIC           | C | T | - | - |
|              | -                  | 15,296,313 | INTERGENIC           | G | A | - | - |
| Tmem184a     | ENSRNOT00000001718 | 15,296,590 | UPSTREAM             | C | T | - | - |
| Tmem184a     | ENSRNOT00000001718 | 15,296,653 | UPSTREAM             | C | T | - | - |
| Tmem184a     | ENSRNOT00000001718 | 15,296,700 | UPSTREAM             | A | G | - | - |
| Tmem184a     | ENSRNOT00000001718 | 15,296,737 | UPSTREAM             | T | C | - | - |
| Tmem184a     | ENSRNOT00000001718 | 15,297,297 | UPSTREAM             | C | T | - | - |
| Tmem184a     | ENSRNOT00000001718 | 15,297,311 | UPSTREAM             | C | T | - | - |
| Tmem184a     | ENSRNOT00000001718 | 15,297,387 | UPSTREAM             | C | A | - | - |
| Tmem184a     | ENSRNOT00000001718 | 15,297,425 | UPSTREAM             | A | G | - | - |
| Tmem184a     | ENSRNOT00000001718 | 15,297,481 | UPSTREAM             | G | A | - | - |
| Tmem184a     | ENSRNOT00000001718 | 15,297,996 | UPSTREAM             | C | T | - | - |
| Tmem184a     | ENSRNOT00000001718 | 15,298,033 | UPSTREAM             | C | T | - | - |
| Tmem184a     | ENSRNOT00000001718 | 15,298,226 | UPSTREAM             | G | A | - | - |
| Tmem184a     | ENSRNOT00000001718 | 15,298,326 | UPSTREAM             | T | C | - | - |
| Tmem184a     | ENSRNOT00000001718 | 15,298,491 | UPSTREAM             | A | G | - | - |
| Tmem184a     | ENSRNOT00000001718 | 15,298,531 | UPSTREAM             | T | C | - | - |
| Tmem184a     | ENSRNOT00000001718 | 15,298,556 | UPSTREAM             | A | G | - | - |
| Tmem184a     | ENSRNOT00000001718 | 15,299,091 | UPSTREAM             | G | A | - | - |
| Tmem184a     | ENSRNOT00000001718 | 15,299,118 | UPSTREAM             | T | C | - | - |
| Tmem184a     | ENSRNOT00000001718 | 15,299,498 | UPSTREAM             | C | T | - | - |
| Tmem184a     | ENSRNOT00000001718 | 15,299,523 | UPSTREAM             | A | C | - | - |
| Tmem184a     | ENSRNOT00000001718 | 15,299,544 | UPSTREAM             | G | A | - | - |
| Tmem184a     | ENSRNOT00000001718 | 15,299,569 | UPSTREAM             | G | A | - | - |
| Tmem184a     | ENSRNOT00000001718 | 15,299,745 | UPSTREAM             | C | T | - | - |
| Tmem184a     | ENSRNOT00000001718 | 15,299,819 | UPSTREAM             | T | C | - | - |
| Tmem184a     | ENSRNOT00000001718 | 15,299,820 | UPSTREAM             | G | A | - | - |
| Tmem184a     | ENSRNOT00000001718 | 15,301,078 | UPSTREAM             | G | T | - | - |
| Tmem184a     | ENSRNOT00000001718 | 15,301,090 | UPSTREAM             | T | A | - | - |
| Tmem184a     | ENSRNOT00000001718 | 15,301,215 | UPSTREAM             | G | C | - | - |
| Tmem184a     | ENSRNOT00000001718 | 15,301,233 | UPSTREAM             | G | A | - | - |
| Tmem184a     | ENSRNOT00000001718 | 15,301,285 | UPSTREAM             | G | C | - | - |
| Tmem184a     | ENSRNOT00000001718 | 15,301,375 | UPSTREAM             | T | C | - | - |
| Tmem184a     | ENSRNOT00000001718 | 15,301,514 | UPSTREAM             | C | T | - | - |
| Tmem184a     | ENSRNOT00000001718 | 15,301,784 | SPLICE_SITE,INTRONIC | C | T | - | - |
| Tmem184a     | ENSRNOT00000001718 | 15,301,987 | INTRONIC             | G | A | - | - |
| Tmem184a     | ENSRNOT00000001718 | 15,302,126 | INTRONIC             | T | C | - | - |
| Tmem184a     | ENSRNOT00000001718 | 15,302,174 | INTRONIC             | C | G | - | - |
| Tmem184a     | ENSRNOT00000001718 | 15,302,212 | INTRONIC             | T | C | - | - |
| Tmem184a     | ENSRNOT00000001718 | 15,304,031 | INTRONIC             | G | A | - | - |
| Tmem184a     | ENSRNOT00000001718 | 15,304,102 | INTRONIC             | T | A | - | - |
| Tmem184a     | ENSRNOT00000001718 | 15,304,177 | INTRONIC             | C | T | - | - |
| Tmem184a     | ENSRNOT00000001718 | 15,304,409 | INTRONIC             | T | C | - | - |
| Tmem184a     | ENSRNOT00000001718 | 15,304,529 | INTRONIC             | T | C | - | - |
| Tmem184a     | ENSRNOT00000001718 | 15,304,583 | INTRONIC             | A | G | - | - |

|              |                    |            |            |   |   |   |   |
|--------------|--------------------|------------|------------|---|---|---|---|
| Tmem184a     | ENSRNOT00000001718 | 15,304,630 | INTRONIC   | G | A | - | - |
| Tmem184a     | ENSRNOT00000001718 | 15,304,783 | INTRONIC   | C | T | - | - |
| Tmem184a     | ENSRNOT00000001718 | 15,304,985 | INTRONIC   | T | C | - | - |
| Tmem184a     | ENSRNOT00000001718 | 15,305,947 | INTRONIC   | C | A | - | - |
| Tmem184a     | ENSRNOT00000001718 | 15,307,192 | INTRONIC   | C | G | - | - |
| Tmem184a     | ENSRNOT00000001718 | 15,307,348 | INTRONIC   | G | A | - | - |
| Tmem184a     | ENSRNOT00000001718 | 15,308,068 | INTRONIC   | G | A | - | - |
| Tmem184a     | ENSRNOT00000001718 | 15,308,389 | INTRONIC   | A | G | - | - |
| Tmem184a     | ENSRNOT00000001718 | 15,312,127 | DOWNSTREAM | G | A | - | - |
| Tmem184a     | ENSRNOT00000001718 | 15,312,641 | DOWNSTREAM | C | T | - | - |
| Tmem184a     | ENSRNOT00000001718 | 15,314,412 | DOWNSTREAM | C | G | - | - |
| Mafk         | ENSRNOT00000001720 | 15,315,403 | INTRONIC   | G | A | - | - |
| Mafk         | ENSRNOT00000001720 | 15,315,926 | INTRONIC   | T | C | - | - |
| Mafk         | ENSRNOT00000001720 | 15,316,030 | INTRONIC   | T | A | - | - |
| Mafk         | ENSRNOT00000001720 | 15,316,932 | INTRONIC   | T | C | - | - |
| Mafk         | ENSRNOT00000001720 | 15,317,413 | INTRONIC   | A | G | - | - |
| Mafk         | ENSRNOT00000001720 | 15,317,430 | INTRONIC   | A | G | - | - |
| Mafk         | ENSRNOT00000001720 | 15,317,978 | INTRONIC   | A | G | - | - |
| Mafk         | ENSRNOT00000001720 | 15,318,251 | INTRONIC   | T | C | - | - |
| -            | -                  | 15,330,718 | INTERGENIC | C | A | - | - |
| -            | -                  | 15,331,721 | INTERGENIC | C | T | - | - |
| -            | -                  | 15,331,745 | INTERGENIC | C | T | - | - |
| -            | -                  | 15,333,699 | INTERGENIC | C | T | - | - |
| -            | -                  | 15,333,730 | INTERGENIC | G | A | - | - |
| LOC100365889 | ENSRNOT00000001727 | 15,336,164 | UPSTREAM   | C | A | - | - |
| LOC100365889 | ENSRNOT00000001727 | 15,336,168 | UPSTREAM   | A | C | - | - |
| LOC100365889 | ENSRNOT00000001727 | 15,336,611 | UPSTREAM   | C | A | - | - |
| LOC100365889 | ENSRNOT00000001727 | 15,341,214 | INTRONIC   | G | T | - | - |
| LOC100365889 | ENSRNOT00000001725 | 15,357,712 | DOWNSTREAM | T | C | - | - |
| LOC100365889 | ENSRNOT00000001725 | 15,357,813 | DOWNSTREAM | A | G | - | - |
| LOC100365889 | ENSRNOT00000001725 | 15,361,145 | DOWNSTREAM | A | T | - | - |
| LOC100365889 | ENSRNOT00000001725 | 15,361,221 | DOWNSTREAM | A | G | - | - |
| LOC100365889 | ENSRNOT00000001725 | 15,361,227 | DOWNSTREAM | T | C | - | - |
| F1LTJ4_RAT   | ENSRNOT00000066335 | 15,365,199 | DOWNSTREAM | C | G | - | - |
| F1LTJ4_RAT   | ENSRNOT00000066335 | 15,365,215 | DOWNSTREAM | A | T | - | - |
| F1LTJ4_RAT   | ENSRNOT00000066335 | 15,365,243 | DOWNSTREAM | C | T | - | - |
| F1LTJ4_RAT   | ENSRNOT00000066335 | 15,365,304 | DOWNSTREAM | G | T | - | - |
| F1LTJ4_RAT   | ENSRNOT00000066335 | 15,366,039 | DOWNSTREAM | G | A | - | - |
| F1LTJ4_RAT   | ENSRNOT00000066335 | 15,366,936 | DOWNSTREAM | T | C | - | - |
| F1LTJ4_RAT   | ENSRNOT00000066335 | 15,367,150 | DOWNSTREAM | C | T | - | - |
| F1LTJ4_RAT   | ENSRNOT00000066335 | 15,367,175 | DOWNSTREAM | T | C | - | - |
| F1LTJ4_RAT   | ENSRNOT00000066335 | 15,367,370 | DOWNSTREAM | A | G | - | - |
| F1LTJ4_RAT   | ENSRNOT00000066335 | 15,367,396 | DOWNSTREAM | T | A | - | - |
| F1LTJ4_RAT   | ENSRNOT00000066335 | 15,367,422 | DOWNSTREAM | G | A | - | - |
| F1LTJ4_RAT   | ENSRNOT00000066335 | 15,367,437 | DOWNSTREAM | T | C | - | - |
| F1LTJ4_RAT   | ENSRNOT00000066335 | 15,367,739 | DOWNSTREAM | T | G | - | - |
| F1LTJ4_RAT   | ENSRNOT00000066335 | 15,367,907 | DOWNSTREAM | T | C | - | - |
| -            | -                  | 15,369,765 | INTERGENIC | G | A | - | - |
| -            | -                  | 15,370,528 | INTERGENIC | T | C | - | - |
| -            | -                  | 15,370,529 | INTERGENIC | T | A | - | - |
| -            | -                  | 15,370,612 | INTERGENIC | T | C | - | - |
| -            | -                  | 15,370,701 | INTERGENIC | T | C | - | - |
| -            | -                  | 15,370,746 | INTERGENIC | T | A | - | - |
| -            | -                  | 15,370,773 | INTERGENIC | T | C | - | - |
| -            | -                  | 15,370,880 | INTERGENIC | C | T | - | - |
| -            | -                  | 15,370,952 | INTERGENIC | T | A | - | - |
| -            | -                  | 15,371,731 | INTERGENIC | C | T | - | - |
| D3ZENO_RAT   | ENSRNOT00000036744 | 15,373,083 | UPSTREAM   | C | T | - | - |
| D3ZENO_RAT   | ENSRNOT00000036744 | 15,374,343 | UPSTREAM   | C | T | - | - |
| D3ZENO_RAT   | ENSRNOT00000036744 | 15,374,345 | UPSTREAM   | C | T | - | - |
| D3ZENO_RAT   | ENSRNOT00000036744 | 15,378,257 | INTRONIC   | T | C | - | - |
| D3ZENO_RAT   | ENSRNOT00000036744 | 15,378,865 | INTRONIC   | A | G | - | - |
| D3ZENO_RAT   | ENSRNOT00000036744 | 15,380,600 | INTRONIC   | A | G | - | - |
| D3ZENO_RAT   | ENSRNOT00000036744 | 15,381,926 | INTRONIC   | A | G | - | - |
| D3ZENO_RAT   | ENSRNOT00000036744 | 15,382,248 | INTRONIC   | G | A | - | - |
| D3ZENO_RAT   | ENSRNOT00000036744 | 15,382,312 | INTRONIC   | G | A | - | - |
| D3ZENO_RAT   | ENSRNOT00000036744 | 15,383,157 | INTRONIC   | G | A | - | - |
| D3ZENO_RAT   | ENSRNOT00000036744 | 15,383,851 | INTRONIC   | A | T | - | - |
| D3ZENO_RAT   | ENSRNOT00000036744 | 15,383,886 | INTRONIC   | G | A | - | - |
| D3ZENO_RAT   | ENSRNOT00000036744 | 15,384,401 | INTRONIC   | C | T | - | - |
| D3ZENO_RAT   | ENSRNOT00000036744 | 15,386,857 | INTRONIC   | T | C | - | - |
| D3ZENO_RAT   | ENSRNOT00000036744 | 15,386,949 | INTRONIC   | C | G | - | - |
| D3ZENO_RAT   | ENSRNOT00000036744 | 15,387,205 | INTRONIC   | G | T | - | - |
| D3ZENO_RAT   | ENSRNOT00000036744 | 15,387,284 | INTRONIC   | A | G | - | - |
| D3ZENO_RAT   | ENSRNOT00000036744 | 15,387,608 | INTRONIC   | T | C | - | - |
| D3ZENO_RAT   | ENSRNOT00000036744 | 15,387,783 | INTRONIC   | C | T | - | - |
| D3ZENO_RAT   | ENSRNOT00000036744 | 15,387,792 | INTRONIC   | A | G | - | - |
| D3ZENO_RAT   | ENSRNOT00000036744 | 15,389,245 | INTRONIC   | C | T | - | - |
| D3ZENO_RAT   | ENSRNOT00000036744 | 15,389,570 | INTRONIC   | G | A | - | - |
| D3ZENO_RAT   | ENSRNOT00000036744 | 15,389,616 | INTRONIC   | T | C | - | - |

|            |                    |            |                       |   |   |   |   |
|------------|--------------------|------------|-----------------------|---|---|---|---|
| D3ZENO_RAT | ENSRNOT00000036744 | 15,389,666 | INTRONIC              | G | A | - | - |
| D3ZENO_RAT | ENSRNOT00000036744 | 15,389,747 | INTRONIC              | A | G | - | - |
| D3ZENO_RAT | ENSRNOT00000036744 | 15,389,810 | INTRONIC              | A | G | - | - |
| D3ZENO_RAT | ENSRNOT00000036744 | 15,389,869 | INTRONIC              | A | G | - | - |
| D3ZENO_RAT | ENSRNOT00000036744 | 15,389,889 | INTRONIC              | G | T | - | - |
| D3ZENO_RAT | ENSRNOT00000036744 | 15,389,966 | INTRONIC              | G | A | - | - |
| D3ZENO_RAT | ENSRNOT00000036744 | 15,389,977 | INTRONIC              | A | G | - | - |
| D3ZENO_RAT | ENSRNOT00000036744 | 15,390,485 | INTRONIC              | A | C | - | - |
| D3ZENO_RAT | ENSRNOT00000036744 | 15,390,489 | INTRONIC              | C | T | - | - |
| D3ZENO_RAT | ENSRNOT00000036744 | 15,390,572 | INTRONIC              | C | T | - | - |
| D3ZENO_RAT | ENSRNOT00000036744 | 15,390,634 | INTRONIC              | T | C | - | - |
| D3ZENO_RAT | ENSRNOT00000036744 | 15,390,679 | INTRONIC              | G | A | - | - |
| D3ZENO_RAT | ENSRNOT00000036744 | 15,390,714 | INTRONIC              | G | A | - | - |
| D3ZENO_RAT | ENSRNOT00000036744 | 15,390,852 | INTRONIC              | G | A | - | - |
| D3ZENO_RAT | ENSRNOT00000036744 | 15,390,875 | INTRONIC              | C | T | - | - |
| D3ZENO_RAT | ENSRNOT00000036744 | 15,390,982 | INTRONIC              | G | C | - | - |
| D3ZENO_RAT | ENSRNOT00000036744 | 15,390,992 | INTRONIC              | G | T | - | - |
| D3ZENO_RAT | ENSRNOT00000036744 | 15,391,007 | INTRONIC              | T | C | - | - |
| D3ZENO_RAT | ENSRNOT00000036744 | 15,391,089 | INTRONIC              | A | G | - | - |
| D3ZENO_RAT | ENSRNOT00000036744 | 15,391,312 | INTRONIC              | T | A | - | - |
| D3ZENO_RAT | ENSRNOT00000036744 | 15,391,323 | INTRONIC              | C | T | - | - |
| D3ZENO_RAT | ENSRNOT00000036744 | 15,391,404 | INTRONIC              | C | T | - | - |
| D3ZENO_RAT | ENSRNOT00000036744 | 15,391,711 | INTRONIC              | C | A | - | - |
| D3ZENO_RAT | ENSRNOT00000036744 | 15,391,716 | INTRONIC              | C | T | - | - |
| D3ZENO_RAT | ENSRNOT00000036744 | 15,391,733 | INTRONIC              | C | T | - | - |
| D3ZENO_RAT | ENSRNOT00000036744 | 15,392,042 | INTRONIC              | A | C | - | - |
| D3ZENO_RAT | ENSRNOT00000036744 | 15,392,394 | INTRONIC              | A | G | - | - |
| D3ZENO_RAT | ENSRNOT00000036744 | 15,392,891 | INTRONIC              | T | G | - | - |
| D3ZENO_RAT | ENSRNOT00000036744 | 15,393,116 | INTRONIC              | T | C | - | - |
| D3ZENO_RAT | ENSRNOT00000036744 | 15,393,187 | INTRONIC              | G | A | - | - |
| D3ZENO_RAT | ENSRNOT00000036744 | 15,393,387 | INTRONIC              | A | G | - | - |
| D3ZENO_RAT | ENSRNOT00000036744 | 15,393,737 | INTRONIC              | T | C | - | - |
| D3ZENO_RAT | ENSRNOT00000036744 | 15,393,982 | SYNONYMOUS_CODING     | T | C | - | - |
| D3ZENO_RAT | ENSRNOT00000036744 | 15,394,308 | INTRONIC              | A | G | - | - |
| D3ZENO_RAT | ENSRNOT00000036744 | 15,395,119 | INTRONIC              | T | C | - | - |
| D3ZENO_RAT | ENSRNOT00000036744 | 15,395,661 | NON_SYNONYMOUS_CODING | T | C | V | A |
| D3ZENO_RAT | ENSRNOT00000036744 | 15,396,279 | INTRONIC              | T | C | - | - |
| D3ZENO_RAT | ENSRNOT00000036744 | 15,396,513 | NON_SYNONYMOUS_CODING | A | G | T | A |
| D3ZENO_RAT | ENSRNOT00000036744 | 15,399,968 | INTRONIC              | A | G | - | - |
| D3ZENO_RAT | ENSRNOT00000036744 | 15,400,124 | INTRONIC              | C | T | - | - |
| D3ZENO_RAT | ENSRNOT00000036744 | 15,400,155 | INTRONIC              | T | C | - | - |
| D3ZENO_RAT | ENSRNOT00000036744 | 15,400,304 | INTRONIC              | G | A | - | - |
| D3ZENO_RAT | ENSRNOT00000036744 | 15,400,375 | INTRONIC              | T | C | - | - |
| D3ZENO_RAT | ENSRNOT00000036744 | 15,401,621 | INTRONIC              | T | A | - | - |
| D3ZENO_RAT | ENSRNOT00000036744 | 15,403,380 | SPLICE_SITE,INTRONIC  | C | T | - | - |
| D3ZENO_RAT | ENSRNOT00000036744 | 15,403,624 | INTRONIC              | T | C | - | - |
| D3ZENO_RAT | ENSRNOT00000036744 | 15,404,014 | INTRONIC              | G | A | - | - |
| D3ZENO_RAT | ENSRNOT00000036744 | 15,404,344 | INTRONIC              | T | C | - | - |
| D3ZENO_RAT | ENSRNOT00000036744 | 15,404,482 | INTRONIC              | C | T | - | - |
| D3ZENO_RAT | ENSRNOT00000036744 | 15,404,583 | INTRONIC              | C | G | - | - |
| D3ZENO_RAT | ENSRNOT00000036744 | 15,404,650 | INTRONIC              | G | A | - | - |
| D3ZENO_RAT | ENSRNOT00000036744 | 15,404,874 | INTRONIC              | G | A | - | - |
| D3ZENO_RAT | ENSRNOT00000036744 | 15,404,926 | INTRONIC              | G | A | - | - |
| D3ZENO_RAT | ENSRNOT00000036744 | 15,405,030 | INTRONIC              | G | A | - | - |
| D3ZENO_RAT | ENSRNOT00000036744 | 15,405,116 | INTRONIC              | A | G | - | - |
| D3ZENO_RAT | ENSRNOT00000036744 | 15,405,801 | INTRONIC              | G | C | - | - |
| D3ZENO_RAT | ENSRNOT00000036744 | 15,405,847 | INTRONIC              | G | C | - | - |
| D3ZENO_RAT | ENSRNOT00000036744 | 15,407,284 | DOWNSTREAM            | G | A | - | - |
| D3ZENO_RAT | ENSRNOT00000036744 | 15,407,296 | DOWNSTREAM            | T | C | - | - |
| D3ZENO_RAT | ENSRNOT00000036744 | 15,407,496 | DOWNSTREAM            | C | T | - | - |
| D3ZENO_RAT | ENSRNOT00000036744 | 15,407,987 | DOWNSTREAM            | C | T | - | - |
| D3ZENO_RAT | ENSRNOT00000036744 | 15,408,064 | DOWNSTREAM            | A | T | - | - |
| D3ZENO_RAT | ENSRNOT00000036744 | 15,408,074 | DOWNSTREAM            | T | C | - | - |
| D3ZENO_RAT | ENSRNOT00000036744 | 15,408,163 | DOWNSTREAM            | T | G | - | - |
| D3ZENO_RAT | ENSRNOT00000036744 | 15,408,192 | DOWNSTREAM            | G | T | - | - |
| D3ZENO_RAT | ENSRNOT00000036744 | 15,408,519 | DOWNSTREAM            | C | T | - | - |
| D3ZENO_RAT | ENSRNOT00000036744 | 15,408,543 | DOWNSTREAM            | G | A | - | - |
| D3ZENO_RAT | ENSRNOT00000036744 | 15,408,664 | DOWNSTREAM            | A | G | - | - |
| D3ZENO_RAT | ENSRNOT00000036744 | 15,409,198 | DOWNSTREAM            | T | C | - | - |
| D3ZENO_RAT | ENSRNOT00000036744 | 15,409,666 | DOWNSTREAM            | T | C | - | - |
| D3ZENO_RAT | ENSRNOT00000036744 | 15,409,908 | DOWNSTREAM            | T | C | - | - |
| D3ZENO_RAT | ENSRNOT00000036744 | 15,410,323 | DOWNSTREAM            | G | A | - | - |
| D3ZENO_RAT | ENSRNOT00000036744 | 15,410,555 | DOWNSTREAM            | A | G | - | - |
| D3ZENO_RAT | ENSRNOT00000036744 | 15,410,784 | DOWNSTREAM            | C | A | - | - |
| D3ZENO_RAT | ENSRNOT00000036744 | 15,410,940 | DOWNSTREAM            | G | A | - | - |
| D3ZENO_RAT | ENSRNOT00000036744 | 15,411,288 | DOWNSTREAM            | T | C | - | - |
| D3ZENO_RAT | ENSRNOT00000036744 | 15,411,292 | DOWNSTREAM            | C | G | - | - |
| -          | -                  | 15,411,737 | INTERGENIC            | C | T | - | - |
| -          | -                  | 15,411,919 | INTERGENIC            | C | A | - | - |
| -          | -                  | 15,412,355 | INTERGENIC            | T | G | - | - |

|   |            |            |   |   |   |   |
|---|------------|------------|---|---|---|---|
| - | 15,412,433 | INTERGENIC | C | T | - | - |
| - | 15,412,850 | INTERGENIC | T | G | - | - |
| - | 15,412,956 | INTERGENIC | T | C | - | - |
| - | 15,413,067 | INTERGENIC | A | G | - | - |
| - | 15,413,110 | INTERGENIC | C | A | - | - |
| - | 15,413,288 | INTERGENIC | G | A | - | - |
| - | 15,413,405 | INTERGENIC | T | C | - | - |
| - | 15,413,435 | INTERGENIC | T | C | - | - |
| - | 15,413,515 | INTERGENIC | A | T | - | - |
| - | 15,413,544 | INTERGENIC | C | T | - | - |
| - | 15,413,565 | INTERGENIC | G | A | - | - |
| - | 15,413,608 | INTERGENIC | A | T | - | - |
| - | 15,413,781 | INTERGENIC | C | T | - | - |
| - | 15,413,832 | INTERGENIC | C | T | - | - |
| - | 15,413,957 | INTERGENIC | C | G | - | - |
| - | 15,414,375 | INTERGENIC | G | A | - | - |
| - | 15,414,399 | INTERGENIC | C | T | - | - |
| - | 15,414,475 | INTERGENIC | T | C | - | - |
| - | 15,415,411 | INTERGENIC | T | A | - | - |
| - | 15,415,528 | INTERGENIC | G | T | - | - |
| - | 15,415,583 | INTERGENIC | C | T | - | - |
| - | 15,415,638 | INTERGENIC | T | C | - | - |
| - | 15,416,465 | INTERGENIC | G | C | - | - |
| - | 15,416,750 | INTERGENIC | A | T | - | - |
| - | 15,416,780 | INTERGENIC | A | C | - | - |
| - | 15,417,668 | INTERGENIC | T | C | - | - |
| - | 15,418,837 | INTERGENIC | G | C | - | - |
| - | 15,419,651 | INTERGENIC | T | C | - | - |
| - | 15,420,367 | INTERGENIC | T | C | - | - |
| - | 15,420,652 | INTERGENIC | C | T | - | - |
| - | 15,420,669 | INTERGENIC | A | G | - | - |
| - | 15,421,477 | INTERGENIC | C | T | - | - |
| - | 15,423,317 | INTERGENIC | C | T | - | - |
| - | 15,423,540 | INTERGENIC | C | T | - | - |
| - | 15,423,593 | INTERGENIC | T | C | - | - |
| - | 15,423,628 | INTERGENIC | C | G | - | - |
| - | 15,423,637 | INTERGENIC | C | T | - | - |
| - | 15,423,661 | INTERGENIC | C | T | - | - |
| - | 15,423,709 | INTERGENIC | T | C | - | - |
| - | 15,423,734 | INTERGENIC | T | A | - | - |
| - | 15,423,742 | INTERGENIC | A | T | - | - |
| - | 15,423,746 | INTERGENIC | A | T | - | - |
| - | 15,426,327 | INTERGENIC | T | A | - | - |
| - | 15,427,545 | INTERGENIC | G | T | - | - |
| - | 15,428,783 | INTERGENIC | T | C | - | - |
| - | 15,429,007 | INTERGENIC | C | T | - | - |
| - | 15,429,225 | INTERGENIC | G | A | - | - |
| - | 15,429,884 | INTERGENIC | A | G | - | - |
| - | 15,431,143 | INTERGENIC | T | C | - | - |
| - | 15,431,777 | INTERGENIC | A | T | - | - |
| - | 15,432,025 | INTERGENIC | C | T | - | - |
| - | 15,432,443 | INTERGENIC | A | G | - | - |
| - | 15,433,338 | INTERGENIC | T | C | - | - |
| - | 15,433,544 | INTERGENIC | T | C | - | - |
| - | 15,433,550 | INTERGENIC | C | G | - | - |
| - | 15,433,970 | INTERGENIC | C | T | - | - |
| - | 15,434,389 | INTERGENIC | A | G | - | - |
| - | 15,434,770 | INTERGENIC | G | A | - | - |
| - | 15,435,065 | INTERGENIC | G | C | - | - |
| - | 15,435,562 | INTERGENIC | A | C | - | - |
| - | 15,435,582 | INTERGENIC | A | G | - | - |
| - | 15,435,814 | INTERGENIC | C | T | - | - |
| - | 15,436,355 | INTERGENIC | G | A | - | - |
| - | 15,436,456 | INTERGENIC | T | C | - | - |
| - | 15,437,845 | INTERGENIC | T | C | - | - |
| - | 15,438,134 | INTERGENIC | G | C | - | - |
| - | 15,438,466 | INTERGENIC | G | A | - | - |
| - | 15,438,626 | INTERGENIC | G | T | - | - |
| - | 15,438,975 | INTERGENIC | T | G | - | - |
| - | 15,438,999 | INTERGENIC | G | A | - | - |
| - | 15,439,269 | INTERGENIC | G | A | - | - |
| - | 15,439,384 | INTERGENIC | G | A | - | - |
| - | 15,439,387 | INTERGENIC | A | G | - | - |
| - | 15,439,541 | INTERGENIC | G | T | - | - |
| - | 15,439,670 | INTERGENIC | C | T | - | - |
| - | 15,439,733 | INTERGENIC | G | T | - | - |
| - | 15,440,266 | INTERGENIC | T | C | - | - |
| - | 15,440,645 | INTERGENIC | G | A | - | - |
| - | 15,440,648 | INTERGENIC | T | C | - | - |
| - | 15,441,175 | INTERGENIC | T | G | - | - |



|   |            |            |   |   |   |   |
|---|------------|------------|---|---|---|---|
| - | 15,441,338 | INTERGENIC | C | G | - | - |
| - | 15,441,481 | INTERGENIC | T | A | - | - |
| - | 15,441,767 | INTERGENIC | G | A | - | - |
| - | 15,442,027 | INTERGENIC | T | A | - | - |
| - | 15,442,102 | INTERGENIC | A | G | - | - |
| - | 15,442,861 | INTERGENIC | A | G | - | - |
| - | 15,442,947 | INTERGENIC | A | G | - | - |
| - | 15,443,021 | INTERGENIC | T | A | - | - |
| - | 15,443,043 | INTERGENIC | C | A | - | - |
| - | 15,443,112 | INTERGENIC | T | C | - | - |
| - | 15,446,695 | INTERGENIC | C | T | - | - |
| - | 15,446,758 | INTERGENIC | G | C | - | - |
| - | 15,446,998 | INTERGENIC | G | C | - | - |
| - | 15,447,425 | INTERGENIC | T | C | - | - |
| - | 15,447,582 | INTERGENIC | C | A | - | - |
| - | 15,450,138 | INTERGENIC | T | C | - | - |
| - | 15,450,142 | INTERGENIC | G | C | - | - |
| - | 15,450,580 | INTERGENIC | A | G | - | - |
| - | 15,451,036 | INTERGENIC | A | G | - | - |
| - | 15,454,918 | INTERGENIC | T | C | - | - |
| - | 15,455,059 | INTERGENIC | G | A | - | - |
| - | 15,455,343 | INTERGENIC | A | T | - | - |
| - | 15,457,855 | INTERGENIC | G | A | - | - |
| - | 15,457,932 | INTERGENIC | T | C | - | - |
| - | 15,458,243 | INTERGENIC | A | C | - | - |
| - | 15,458,939 | INTERGENIC | A | G | - | - |
| - | 15,458,949 | INTERGENIC | C | T | - | - |
| - | 15,459,203 | INTERGENIC | G | T | - | - |
| - | 15,459,840 | INTERGENIC | A | C | - | - |
| - | 15,460,463 | INTERGENIC | T | C | - | - |
| - | 15,460,883 | INTERGENIC | G | A | - | - |
| - | 15,461,618 | INTERGENIC | G | A | - | - |
| - | 15,463,589 | INTERGENIC | A | G | - | - |
| - | 15,463,649 | INTERGENIC | G | A | - | - |
| - | 15,463,667 | INTERGENIC | G | A | - | - |
| - | 15,467,806 | INTERGENIC | G | A | - | - |
| - | 15,467,812 | INTERGENIC | G | A | - | - |
| - | 15,468,029 | INTERGENIC | A | G | - | - |
| - | 15,468,316 | INTERGENIC | A | G | - | - |
| - | 15,468,827 | INTERGENIC | C | T | - | - |
| - | 15,468,860 | INTERGENIC | G | A | - | - |
| - | 15,469,088 | INTERGENIC | T | C | - | - |
| - | 15,469,172 | INTERGENIC | T | G | - | - |
| - | 15,470,358 | INTERGENIC | C | T | - | - |
| - | 15,471,545 | INTERGENIC | C | T | - | - |
| - | 15,471,550 | INTERGENIC | C | T | - | - |
| - | 15,471,571 | INTERGENIC | T | C | - | - |
| - | 15,471,572 | INTERGENIC | A | C | - | - |
| - | 15,472,051 | INTERGENIC | A | C | - | - |
| - | 15,472,630 | INTERGENIC | A | T | - | - |
| - | 15,472,637 | INTERGENIC | C | T | - | - |
| - | 15,472,819 | INTERGENIC | A | C | - | - |
| - | 15,472,933 | INTERGENIC | G | A | - | - |
| - | 15,473,483 | INTERGENIC | G | A | - | - |
| - | 15,473,699 | INTERGENIC | C | T | - | - |
| - | 15,474,525 | INTERGENIC | G | A | - | - |
| - | 15,474,822 | INTERGENIC | A | G | - | - |
| - | 15,475,363 | INTERGENIC | C | A | - | - |
| - | 15,475,518 | INTERGENIC | G | A | - | - |
| - | 15,475,557 | INTERGENIC | A | G | - | - |
| - | 15,475,561 | INTERGENIC | A | G | - | - |
| - | 15,476,192 | INTERGENIC | C | T | - | - |
| - | 15,477,659 | INTERGENIC | T | C | - | - |
| - | 15,478,428 | INTERGENIC | A | G | - | - |
| - | 15,478,727 | INTERGENIC | C | T | - | - |
| - | 15,478,842 | INTERGENIC | T | C | - | - |
| - | 15,478,883 | INTERGENIC | C | T | - | - |
| - | 15,479,313 | INTERGENIC | C | T | - | - |
| - | 15,479,719 | INTERGENIC | C | T | - | - |
| - | 15,479,842 | INTERGENIC | C | T | - | - |
| - | 15,480,092 | INTERGENIC | A | G | - | - |
| - | 15,480,216 | INTERGENIC | A | C | - | - |
| - | 15,480,217 | INTERGENIC | A | C | - | - |
| - | 15,480,363 | INTERGENIC | A | G | - | - |
| - | 15,480,713 | INTERGENIC | G | A | - | - |
| - | 15,480,882 | INTERGENIC | A | G | - | - |
| - | 15,480,983 | INTERGENIC | C | T | - | - |
| - | 15,481,730 | INTERGENIC | T | C | - | - |
| - | 15,481,893 | INTERGENIC | T | C | - | - |
| - | 15,481,940 | INTERGENIC | C | T | - | - |

|   |            |            |   |   |   |   |
|---|------------|------------|---|---|---|---|
| - | 15,481,957 | INTERGENIC | T | C | - | - |
| - | 15,481,984 | INTERGENIC | A | G | - | - |
| - | 15,491,328 | INTERGENIC | C | T | - | - |
| - | 15,496,141 | INTERGENIC | C | T | - | - |
| - | 15,496,565 | INTERGENIC | T | C | - | - |
| - | 15,497,142 | INTERGENIC | A | G | - | - |
| - | 15,498,722 | INTERGENIC | T | C | - | - |
| - | 15,499,327 | INTERGENIC | T | A | - | - |
| - | 15,499,328 | INTERGENIC | A | G | - | - |
| - | 15,500,282 | INTERGENIC | A | G | - | - |
| - | 15,500,839 | INTERGENIC | G | A | - | - |
| - | 15,501,146 | INTERGENIC | A | G | - | - |
| - | 15,501,160 | INTERGENIC | C | A | - | - |
| - | 15,501,176 | INTERGENIC | T | C | - | - |
| - | 15,501,228 | INTERGENIC | C | T | - | - |
| - | 15,501,281 | INTERGENIC | T | C | - | - |
| - | 15,502,259 | INTERGENIC | T | C | - | - |
| - | 15,502,621 | INTERGENIC | C | T | - | - |
| - | 15,503,430 | INTERGENIC | A | G | - | - |
| - | 15,503,451 | INTERGENIC | T | C | - | - |
| - | 15,503,777 | INTERGENIC | G | A | - | - |
| - | 15,506,932 | INTERGENIC | C | T | - | - |
| - | 15,506,971 | INTERGENIC | C | T | - | - |
| - | 15,507,799 | INTERGENIC | T | G | - | - |
| - | 15,512,607 | INTERGENIC | T | C | - | - |
| - | 15,512,836 | INTERGENIC | G | A | - | - |
| - | 15,512,875 | INTERGENIC | T | C | - | - |
| - | 15,513,962 | INTERGENIC | T | C | - | - |
| - | 15,514,150 | INTERGENIC | C | T | - | - |
| - | 15,514,153 | INTERGENIC | G | A | - | - |
| - | 15,514,194 | INTERGENIC | T | C | - | - |
| - | 15,514,763 | INTERGENIC | T | C | - | - |
| - | 15,515,115 | INTERGENIC | A | C | - | - |
| - | 15,515,667 | INTERGENIC | A | T | - | - |
| - | 15,515,814 | INTERGENIC | A | G | - | - |
| - | 15,516,140 | INTERGENIC | T | C | - | - |
| - | 15,516,286 | INTERGENIC | C | T | - | - |
| - | 15,516,356 | INTERGENIC | G | A | - | - |
| - | 15,516,499 | INTERGENIC | G | A | - | - |
| - | 15,516,969 | INTERGENIC | T | C | - | - |
| - | 15,517,355 | INTERGENIC | T | C | - | - |
| - | 15,517,483 | INTERGENIC | T | C | - | - |
| - | 15,517,490 | INTERGENIC | T | A | - | - |
| - | 15,518,519 | INTERGENIC | G | A | - | - |
| - | 15,518,624 | INTERGENIC | T | G | - | - |
| - | 15,519,413 | INTERGENIC | A | T | - | - |
| - | 15,519,419 | INTERGENIC | G | T | - | - |
| - | 15,519,425 | INTERGENIC | G | T | - | - |
| - | 15,519,642 | INTERGENIC | A | C | - | - |
| - | 15,519,645 | INTERGENIC | T | C | - | - |
| - | 15,519,702 | INTERGENIC | T | C | - | - |
| - | 15,520,323 | INTERGENIC | A | G | - | - |
| - | 15,520,327 | INTERGENIC | G | A | - | - |
| - | 15,520,340 | INTERGENIC | T | C | - | - |
| - | 15,520,532 | INTERGENIC | C | G | - | - |
| - | 15,520,638 | INTERGENIC | A | G | - | - |
| - | 15,520,752 | INTERGENIC | C | T | - | - |
| - | 15,520,809 | INTERGENIC | T | C | - | - |
| - | 15,520,869 | INTERGENIC | A | G | - | - |
| - | 15,521,009 | INTERGENIC | A | G | - | - |
| - | 15,521,837 | INTERGENIC | C | T | - | - |
| - | 15,521,887 | INTERGENIC | C | A | - | - |
| - | 15,522,881 | INTERGENIC | C | T | - | - |
| - | 15,522,884 | INTERGENIC | C | T | - | - |
| - | 15,522,904 | INTERGENIC | C | T | - | - |
| - | 15,522,909 | INTERGENIC | C | T | - | - |
| - | 15,523,562 | INTERGENIC | A | C | - | - |
| - | 15,523,585 | INTERGENIC | C | T | - | - |
| - | 15,526,020 | INTERGENIC | A | T | - | - |
| - | 15,532,791 | INTERGENIC | T | C | - | - |
| - | 15,533,134 | INTERGENIC | A | G | - | - |
| - | 15,533,191 | INTERGENIC | C | T | - | - |
| - | 15,533,324 | INTERGENIC | C | T | - | - |
| - | 15,534,424 | INTERGENIC | A | C | - | - |
| - | 15,535,087 | INTERGENIC | T | C | - | - |
| - | 15,535,287 | INTERGENIC | C | T | - | - |
| - | 15,535,783 | INTERGENIC | C | T | - | - |
| - | 15,537,180 | INTERGENIC | T | C | - | - |
| - | 15,537,425 | INTERGENIC | C | T | - | - |
| - | 15,537,590 | INTERGENIC | A | G | - | - |

|   |            |            |   |   |   |   |
|---|------------|------------|---|---|---|---|
| - | 15,538,194 | INTERGENIC | A | C | - | - |
| - | 15,538,206 | INTERGENIC | A | C | - | - |
| - | 15,539,882 | INTERGENIC | C | T | - | - |
| - | 15,540,081 | INTERGENIC | C | A | - | - |
| - | 15,540,093 | INTERGENIC | A | C | - | - |
| - | 15,540,350 | INTERGENIC | A | G | - | - |
| - | 15,543,430 | INTERGENIC | A | G | - | - |
| - | 15,544,091 | INTERGENIC | A | G | - | - |
| - | 15,544,588 | INTERGENIC | C | T | - | - |
| - | 15,544,658 | INTERGENIC | T | G | - | - |
| - | 15,544,954 | INTERGENIC | G | T | - | - |
| - | 15,545,169 | INTERGENIC | G | T | - | - |
| - | 15,545,296 | INTERGENIC | A | G | - | - |
| - | 15,546,278 | INTERGENIC | G | T | - | - |
| - | 15,546,841 | INTERGENIC | C | T | - | - |
| - | 15,547,050 | INTERGENIC | A | G | - | - |
| - | 15,547,124 | INTERGENIC | T | C | - | - |
| - | 15,547,295 | INTERGENIC | T | C | - | - |
| - | 15,547,609 | INTERGENIC | T | C | - | - |
| - | 15,547,828 | INTERGENIC | G | A | - | - |
| - | 15,548,089 | INTERGENIC | G | T | - | - |
| - | 15,548,146 | INTERGENIC | G | C | - | - |
| - | 15,548,407 | INTERGENIC | T | C | - | - |
| - | 15,549,512 | INTERGENIC | C | T | - | - |
| - | 15,549,652 | INTERGENIC | G | A | - | - |
| - | 15,550,300 | INTERGENIC | A | G | - | - |
| - | 15,551,076 | INTERGENIC | T | C | - | - |
| - | 15,551,086 | INTERGENIC | C | T | - | - |
| - | 15,551,096 | INTERGENIC | A | G | - | - |
| - | 15,551,124 | INTERGENIC | G | T | - | - |
| - | 15,551,201 | INTERGENIC | G | A | - | - |
| - | 15,551,656 | INTERGENIC | T | C | - | - |
| - | 15,551,940 | INTERGENIC | G | A | - | - |
| - | 15,552,009 | INTERGENIC | G | A | - | - |
| - | 15,552,300 | INTERGENIC | A | C | - | - |
| - | 15,552,322 | INTERGENIC | T | C | - | - |
| - | 15,553,095 | INTERGENIC | A | C | - | - |
| - | 15,553,171 | INTERGENIC | C | T | - | - |
| - | 15,553,872 | INTERGENIC | C | T | - | - |
| - | 15,553,925 | INTERGENIC | C | T | - | - |
| - | 15,553,978 | INTERGENIC | C | T | - | - |
| - | 15,553,987 | INTERGENIC | G | C | - | - |
| - | 15,553,989 | INTERGENIC | G | T | - | - |
| - | 15,554,322 | INTERGENIC | C | G | - | - |
| - | 15,554,346 | INTERGENIC | T | C | - | - |
| - | 15,554,943 | INTERGENIC | T | A | - | - |
| - | 15,554,949 | INTERGENIC | C | T | - | - |
| - | 15,555,190 | INTERGENIC | G | A | - | - |
| - | 15,555,302 | INTERGENIC | G | C | - | - |
| - | 15,555,535 | INTERGENIC | C | T | - | - |
| - | 15,555,781 | INTERGENIC | T | G | - | - |
| - | 15,555,906 | INTERGENIC | A | G | - | - |
| - | 15,555,970 | INTERGENIC | T | C | - | - |
| - | 15,556,637 | INTERGENIC | G | A | - | - |
| - | 15,556,888 | INTERGENIC | C | G | - | - |
| - | 15,557,035 | INTERGENIC | A | G | - | - |
| - | 15,557,185 | INTERGENIC | A | G | - | - |
| - | 15,557,520 | INTERGENIC | G | A | - | - |
| - | 15,557,602 | INTERGENIC | C | T | - | - |
| - | 15,557,614 | INTERGENIC | C | T | - | - |
| - | 15,557,718 | INTERGENIC | T | C | - | - |
| - | 15,557,748 | INTERGENIC | C | T | - | - |
| - | 15,558,049 | INTERGENIC | T | C | - | - |
| - | 15,558,103 | INTERGENIC | T | C | - | - |
| - | 15,558,307 | INTERGENIC | A | G | - | - |
| - | 15,558,320 | INTERGENIC | A | G | - | - |
| - | 15,558,682 | INTERGENIC | A | G | - | - |
| - | 15,559,773 | INTERGENIC | A | G | - | - |
| - | 15,559,919 | INTERGENIC | A | G | - | - |
| - | 15,560,085 | INTERGENIC | T | C | - | - |
| - | 15,560,772 | INTERGENIC | C | T | - | - |
| - | 15,561,304 | INTERGENIC | T | G | - | - |
| - | 15,562,273 | INTERGENIC | C | T | - | - |
| - | 15,562,476 | INTERGENIC | C | T | - | - |
| - | 15,562,653 | INTERGENIC | A | G | - | - |
| - | 15,562,668 | INTERGENIC | T | G | - | - |
| - | 15,562,858 | INTERGENIC | A | G | - | - |
| - | 15,563,908 | INTERGENIC | T | C | - | - |
| - | 15,564,791 | INTERGENIC | A | T | - | - |
| - | 15,566,840 | INTERGENIC | A | C | - | - |

|      |                    |            |            |   |   |   |   |
|------|--------------------|------------|------------|---|---|---|---|
|      | -                  | 15,571,315 | INTERGENIC | C | T | - | - |
| Uncx | ENSRNOT00000001730 | 15,574,811 | DOWNSTREAM | A | G | - | - |
| Uncx | ENSRNOT00000001730 | 15,578,941 | INTRONIC   | G | A | - | - |
| Uncx | ENSRNOT00000001730 | 15,579,407 | INTRONIC   | A | C | - | - |
| Uncx | ENSRNOT00000001730 | 15,580,199 | INTRONIC   | G | A | - | - |
| Uncx | ENSRNOT00000001730 | 15,581,900 | UPSTREAM   | A | G | - | - |
| Uncx | ENSRNOT00000001730 | 15,582,167 | UPSTREAM   | G | A | - | - |
| Uncx | ENSRNOT00000001730 | 15,582,479 | UPSTREAM   | A | G | - | - |
| Uncx | ENSRNOT00000001730 | 15,582,655 | UPSTREAM   | A | G | - | - |
| Uncx | ENSRNOT00000001730 | 15,583,440 | UPSTREAM   | A | G | - | - |
| Uncx | ENSRNOT00000001730 | 15,583,680 | UPSTREAM   | G | T | - | - |
| Uncx | ENSRNOT00000001730 | 15,583,946 | UPSTREAM   | G | A | - | - |
|      | -                  | 15,586,187 | INTERGENIC | C | G | - | - |
|      | -                  | 15,590,923 | INTERGENIC | T | C | - | - |
|      | -                  | 15,590,989 | INTERGENIC | T | C | - | - |
|      | -                  | 15,591,779 | INTERGENIC | G | A | - | - |
|      | -                  | 15,592,236 | INTERGENIC | G | A | - | - |
|      | -                  | 15,592,784 | INTERGENIC | A | G | - | - |
|      | -                  | 15,595,448 | INTERGENIC | T | G | - | - |
|      | -                  | 15,595,685 | INTERGENIC | T | C | - | - |
|      | -                  | 15,596,736 | INTERGENIC | A | G | - | - |
|      | -                  | 15,597,501 | INTERGENIC | G | A | - | - |
|      | -                  | 15,597,586 | INTERGENIC | T | A | - | - |
|      | -                  | 15,597,590 | INTERGENIC | A | T | - | - |
|      | -                  | 15,597,653 | INTERGENIC | A | G | - | - |
|      | -                  | 15,597,682 | INTERGENIC | A | T | - | - |
|      | -                  | 15,597,736 | INTERGENIC | T | A | - | - |
|      | -                  | 15,597,738 | INTERGENIC | A | T | - | - |
|      | -                  | 15,597,794 | INTERGENIC | A | T | - | - |
|      | -                  | 15,597,885 | INTERGENIC | A | G | - | - |
|      | -                  | 15,597,886 | INTERGENIC | T | A | - | - |
|      | -                  | 15,598,034 | INTERGENIC | C | A | - | - |
|      | -                  | 15,598,192 | INTERGENIC | C | A | - | - |
|      | -                  | 15,598,237 | INTERGENIC | G | A | - | - |
|      | -                  | 15,598,239 | INTERGENIC | A | G | - | - |
|      | -                  | 15,598,477 | INTERGENIC | G | A | - | - |
|      | -                  | 15,598,624 | INTERGENIC | C | T | - | - |
|      | -                  | 15,598,699 | INTERGENIC | C | T | - | - |
|      | -                  | 15,598,896 | INTERGENIC | T | C | - | - |
|      | -                  | 15,599,040 | INTERGENIC | G | C | - | - |
|      | -                  | 15,599,046 | INTERGENIC | T | C | - | - |
|      | -                  | 15,599,137 | INTERGENIC | T | C | - | - |
|      | -                  | 15,600,041 | INTERGENIC | A | G | - | - |
|      | -                  | 15,600,126 | INTERGENIC | A | G | - | - |
|      | -                  | 15,600,298 | INTERGENIC | C | A | - | - |
|      | -                  | 15,600,336 | INTERGENIC | T | C | - | - |
|      | -                  | 15,600,350 | INTERGENIC | C | A | - | - |
|      | -                  | 15,600,983 | INTERGENIC | C | T | - | - |
|      | -                  | 15,601,627 | INTERGENIC | G | T | - | - |
|      | -                  | 15,601,680 | INTERGENIC | A | T | - | - |
|      | -                  | 15,601,695 | INTERGENIC | G | A | - | - |
|      | -                  | 15,601,811 | INTERGENIC | A | G | - | - |
|      | -                  | 15,601,872 | INTERGENIC | G | A | - | - |
|      | -                  | 15,602,037 | INTERGENIC | C | T | - | - |
|      | -                  | 15,602,259 | INTERGENIC | C | T | - | - |
|      | -                  | 15,602,273 | INTERGENIC | C | T | - | - |
|      | -                  | 15,602,623 | INTERGENIC | G | A | - | - |
|      | -                  | 15,602,726 | INTERGENIC | G | A | - | - |
|      | -                  | 15,602,737 | INTERGENIC | T | C | - | - |
|      | -                  | 15,603,199 | INTERGENIC | A | G | - | - |
|      | -                  | 15,603,353 | INTERGENIC | A | T | - | - |
|      | -                  | 15,604,123 | INTERGENIC | T | C | - | - |
|      | -                  | 15,604,687 | INTERGENIC | T | G | - | - |
|      | -                  | 15,604,778 | INTERGENIC | A | T | - | - |
|      | -                  | 15,605,208 | INTERGENIC | T | C | - | - |
|      | -                  | 15,605,600 | INTERGENIC | G | A | - | - |
|      | -                  | 15,606,187 | INTERGENIC | A | C | - | - |
|      | -                  | 15,606,195 | INTERGENIC | G | A | - | - |
|      | -                  | 15,606,220 | INTERGENIC | T | C | - | - |
|      | -                  | 15,606,346 | INTERGENIC | G | T | - | - |
|      | -                  | 15,606,440 | INTERGENIC | A | G | - | - |
|      | -                  | 15,606,498 | INTERGENIC | G | C | - | - |
|      | -                  | 15,606,528 | INTERGENIC | G | A | - | - |
|      | -                  | 15,607,311 | INTERGENIC | C | A | - | - |
|      | -                  | 15,607,892 | INTERGENIC | C | T | - | - |
|      | -                  | 15,608,504 | INTERGENIC | T | C | - | - |
|      | -                  | 15,609,108 | INTERGENIC | C | T | - | - |
|      | -                  | 15,609,147 | INTERGENIC | C | A | - | - |
|      | -                  | 15,609,191 | INTERGENIC | T | C | - | - |
|      | -                  | 15,609,498 | INTERGENIC | G | A | - | - |

|           |                    |            |                       |   |   |   |   |
|-----------|--------------------|------------|-----------------------|---|---|---|---|
| -         | -                  | 15,609,690 | INTERGENIC            | A | G | - | - |
| -         | -                  | 15,609,756 | INTERGENIC            | G | T | - | - |
| -         | -                  | 15,610,233 | INTERGENIC            | T | C | - | - |
| -         | -                  | 15,610,264 | INTERGENIC            | A | G | - | - |
| -         | -                  | 15,610,320 | INTERGENIC            | T | C | - | - |
| -         | -                  | 15,610,472 | INTERGENIC            | C | T | - | - |
| -         | -                  | 15,610,612 | INTERGENIC            | A | G | - | - |
| -         | -                  | 15,610,635 | INTERGENIC            | G | A | - | - |
| -         | -                  | 15,610,839 | INTERGENIC            | G | A | - | - |
| -         | -                  | 15,611,199 | INTERGENIC            | A | G | - | - |
| -         | -                  | 15,611,201 | INTERGENIC            | G | A | - | - |
| LOC498152 | ENSRNOT00000043992 | 15,629,285 | UPSTREAM              | C | A | - | - |
| LOC498152 | ENSRNOT00000043992 | 15,629,482 | UPSTREAM              | G | A | - | - |
| LOC498152 | ENSRNOT00000043992 | 15,629,601 | UPSTREAM              | A | G | - | - |
| LOC498152 | ENSRNOT00000043992 | 15,630,142 | NON_SYNONYMOUS_CODING | T | C | I | T |
| LOC498152 | ENSRNOT00000043992 | 15,630,192 | NON_SYNONYMOUS_CODING | C | T | H | Y |
| LOC498152 | ENSRNOT00000043992 | 15,630,805 | INTRONIC              | T | A | - | - |
| LOC498152 | ENSRNOT00000043992 | 15,630,806 | INTRONIC              | G | T | - | - |
| LOC498152 | ENSRNOT00000043992 | 15,631,023 | INTRONIC              | A | T | - | - |
| LOC498152 | ENSRNOT00000043992 | 15,631,072 | INTRONIC              | C | T | - | - |
| LOC498152 | ENSRNOT00000043992 | 15,631,146 | INTRONIC              | T | A | - | - |
| LOC498152 | ENSRNOT00000043992 | 15,631,477 | INTRONIC              | A | G | - | - |
| LOC498152 | ENSRNOT00000043992 | 15,631,567 | INTRONIC              | T | C | - | - |
| LOC498152 | ENSRNOT00000043992 | 15,632,032 | INTRONIC              | T | C | - | - |
| LOC498152 | ENSRNOT00000043992 | 15,632,512 | INTRONIC              | G | A | - | - |
| LOC498152 | ENSRNOT00000043992 | 15,633,115 | INTRONIC              | A | G | - | - |
| LOC498152 | ENSRNOT00000043992 | 15,633,210 | INTRONIC              | C | T | - | - |
| LOC498152 | ENSRNOT00000043992 | 15,633,249 | INTRONIC              | G | A | - | - |
| LOC498152 | ENSRNOT00000043992 | 15,633,646 | INTRONIC              | A | G | - | - |
| LOC498152 | ENSRNOT00000043992 | 15,633,741 | INTRONIC              | G | A | - | - |
| LOC498152 | ENSRNOT00000043992 | 15,633,939 | INTRONIC              | A | C | - | - |
| LOC498152 | ENSRNOT00000043992 | 15,634,063 | INTRONIC              | T | G | - | - |
| LOC498152 | ENSRNOT00000043992 | 15,634,269 | INTRONIC              | A | G | - | - |
| LOC498152 | ENSRNOT00000043992 | 15,634,527 | INTRONIC              | C | A | - | - |
| LOC498152 | ENSRNOT00000043992 | 15,634,554 | INTRONIC              | C | G | - | - |
| LOC498152 | ENSRNOT00000043992 | 15,634,616 | INTRONIC              | T | C | - | - |
| LOC498152 | ENSRNOT00000043992 | 15,634,682 | INTRONIC              | G | C | - | - |
| LOC498152 | ENSRNOT00000043992 | 15,634,746 | INTRONIC              | G | A | - | - |
| LOC498152 | ENSRNOT00000043992 | 15,635,624 | INTRONIC              | G | A | - | - |
| LOC498152 | ENSRNOT00000043992 | 15,635,780 | INTRONIC              | G | A | - | - |
| LOC498152 | ENSRNOT00000043992 | 15,635,968 | INTRONIC              | G | A | - | - |
| LOC498152 | ENSRNOT00000043992 | 15,636,185 | INTRONIC              | T | C | - | - |
| LOC498152 | ENSRNOT00000043992 | 15,636,262 | NON_SYNONYMOUS_CODING | T | G | I | S |
| LOC498152 | ENSRNOT00000043992 | 15,636,424 | INTRONIC              | A | T | - | - |
| LOC498152 | ENSRNOT00000043992 | 15,636,466 | INTRONIC              | G | A | - | - |
| LOC498152 | ENSRNOT00000043992 | 15,636,722 | INTRONIC              | C | T | - | - |
| LOC498152 | ENSRNOT00000043992 | 15,636,753 | INTRONIC              | T | C | - | - |
| LOC498152 | ENSRNOT00000043992 | 15,636,763 | INTRONIC              | C | T | - | - |
| LOC498152 | ENSRNOT00000043992 | 15,636,943 | INTRONIC              | T | C | - | - |
| LOC498152 | ENSRNOT00000043992 | 15,637,130 | INTRONIC              | T | C | - | - |
| LOC498152 | ENSRNOT00000043992 | 15,637,153 | INTRONIC              | A | G | - | - |
| LOC498152 | ENSRNOT00000043992 | 15,637,200 | INTRONIC              | A | C | - | - |
| LOC498152 | ENSRNOT00000043992 | 15,637,552 | INTRONIC              | G | C | - | - |
| LOC498152 | ENSRNOT00000043992 | 15,637,584 | INTRONIC              | T | C | - | - |
| LOC498152 | ENSRNOT00000043992 | 15,637,643 | INTRONIC              | T | C | - | - |
| LOC498152 | ENSRNOT00000043992 | 15,637,764 | INTRONIC              | T | A | - | - |
| LOC498152 | ENSRNOT00000043992 | 15,638,857 | INTRONIC              | A | C | - | - |
| LOC498152 | ENSRNOT00000043992 | 15,639,215 | INTRONIC              | A | G | - | - |
| LOC498152 | ENSRNOT00000043992 | 15,640,117 | INTRONIC              | G | T | - | - |
| LOC498152 | ENSRNOT00000043992 | 15,640,706 | INTRONIC              | T | C | - | - |
| LOC498152 | ENSRNOT00000043992 | 15,642,618 | DOWNSTREAM            | C | A | - | - |
| LOC498152 | ENSRNOT00000043992 | 15,643,003 | DOWNSTREAM            | C | T | - | - |
| LOC498152 | ENSRNOT00000043992 | 15,643,484 | DOWNSTREAM            | T | G | - | - |
| LOC498152 | ENSRNOT00000043992 | 15,643,603 | DOWNSTREAM            | G | C | - | - |
| LOC498152 | ENSRNOT00000043992 | 15,643,621 | DOWNSTREAM            | C | T | - | - |
| LOC498152 | ENSRNOT00000043992 | 15,643,720 | DOWNSTREAM            | A | G | - | - |
| LOC498152 | ENSRNOT00000043992 | 15,643,730 | DOWNSTREAM            | T | G | - | - |
| LOC498152 | ENSRNOT00000043992 | 15,643,768 | DOWNSTREAM            | G | T | - | - |
| LOC498152 | ENSRNOT00000043992 | 15,643,826 | DOWNSTREAM            | G | A | - | - |
| LOC498152 | ENSRNOT00000043992 | 15,644,317 | DOWNSTREAM            | C | T | - | - |
| LOC498152 | ENSRNOT00000043992 | 15,644,537 | DOWNSTREAM            | C | T | - | - |
| LOC498152 | ENSRNOT00000043992 | 15,645,044 | DOWNSTREAM            | G | T | - | - |
| LOC498152 | ENSRNOT00000043992 | 15,645,161 | DOWNSTREAM            | T | C | - | - |
| LOC498152 | ENSRNOT00000043992 | 15,647,095 | DOWNSTREAM            | T | C | - | - |
| -         | -                  | 15,647,587 | INTERGENIC            | T | C | - | - |
| -         | -                  | 15,649,315 | INTERGENIC            | T | C | - | - |
| -         | -                  | 15,649,665 | INTERGENIC            | A | G | - | - |
| -         | -                  | 15,649,911 | INTERGENIC            | T | A | - | - |
| -         | -                  | 15,650,682 | INTERGENIC            | G | A | - | - |
| -         | -                  | 15,651,198 | INTERGENIC            | C | T | - | - |

|           |                    |            |            |   |   |   |   |
|-----------|--------------------|------------|------------|---|---|---|---|
| -         |                    | 15,651,434 | INTERGENIC | T | G | - | - |
| -         |                    | 15,651,632 | INTERGENIC | G | A | - | - |
| -         |                    | 15,651,815 | INTERGENIC | G | A | - | - |
| -         |                    | 15,652,258 | INTERGENIC | T | C | - | - |
| -         |                    | 15,652,279 | INTERGENIC | T | A | - | - |
| -         |                    | 15,652,404 | INTERGENIC | A | G | - | - |
| -         |                    | 15,652,687 | INTERGENIC | A | G | - | - |
| -         |                    | 15,653,937 | INTERGENIC | A | G | - | - |
| -         |                    | 15,653,995 | INTERGENIC | G | T | - | - |
| -         |                    | 15,654,112 | INTERGENIC | G | T | - | - |
| -         |                    | 15,654,292 | INTERGENIC | A | G | - | - |
| -         |                    | 15,654,669 | INTERGENIC | T | C | - | - |
| -         |                    | 15,655,677 | INTERGENIC | C | A | - | - |
| -         |                    | 15,655,719 | INTERGENIC | C | T | - | - |
| -         |                    | 15,655,804 | INTERGENIC | T | C | - | - |
| Zfand2a   | ENSRNOT00000047634 | 15,656,934 | UPSTREAM   | G | C | - | - |
| Zfand2a   | ENSRNOT00000047634 | 15,657,992 | UPSTREAM   | A | G | - | - |
| Zfand2a   | ENSRNOT00000047634 | 15,658,034 | UPSTREAM   | C | T | - | - |
| Zfand2a   | ENSRNOT00000047634 | 15,658,883 | UPSTREAM   | G | A | - | - |
| Zfand2a   | ENSRNOT00000047634 | 15,658,936 | UPSTREAM   | T | C | - | - |
| Zfand2a   | ENSRNOT00000047634 | 15,659,288 | UPSTREAM   | G | C | - | - |
| Zfand2a   | ENSRNOT00000047634 | 15,659,436 | UPSTREAM   | A | G | - | - |
| Zfand2a   | ENSRNOT00000047634 | 15,660,153 | UPSTREAM   | T | C | - | - |
| Zfand2a   | ENSRNOT00000047634 | 15,660,262 | UPSTREAM   | C | G | - | - |
| Zfand2a   | ENSRNOT00000047634 | 15,660,276 | UPSTREAM   | C | T | - | - |
| Zfand2a   | ENSRNOT00000047634 | 15,660,425 | UPSTREAM   | T | G | - | - |
| Zfand2a   | ENSRNOT00000047634 | 15,661,333 | UPSTREAM   | C | G | - | - |
| Zfand2a   | ENSRNOT00000047634 | 15,662,266 | INTRONIC   | A | C | - | - |
| Zfand2a   | ENSRNOT00000047634 | 15,662,361 | INTRONIC   | A | G | - | - |
| Zfand2a   | ENSRNOT00000047634 | 15,662,746 | INTRONIC   | A | C | - | - |
| Zfand2a   | ENSRNOT00000047634 | 15,662,922 | INTRONIC   | T | G | - | - |
| Zfand2a   | ENSRNOT00000047634 | 15,662,953 | INTRONIC   | T | C | - | - |
| Zfand2a   | ENSRNOT00000047634 | 15,663,711 | INTRONIC   | G | A | - | - |
| Zfand2a   | ENSRNOT00000047634 | 15,663,894 | INTRONIC   | C | G | - | - |
| Zfand2a   | ENSRNOT00000047634 | 15,664,387 | INTRONIC   | A | G | - | - |
| Zfand2a   | ENSRNOT00000047634 | 15,664,435 | INTRONIC   | C | T | - | - |
| Zfand2a   | ENSRNOT00000047634 | 15,664,527 | INTRONIC   | A | G | - | - |
| Zfand2a   | ENSRNOT00000047634 | 15,665,944 | INTRONIC   | G | A | - | - |
| Zfand2a   | ENSRNOT00000047634 | 15,666,358 | INTRONIC   | G | T | - | - |
| Zfand2a   | ENSRNOT00000047634 | 15,666,817 | INTRONIC   | A | G | - | - |
| Zfand2a   | ENSRNOT00000047634 | 15,666,951 | INTRONIC   | G | A | - | - |
| Zfand2a   | ENSRNOT00000047634 | 15,667,399 | INTRONIC   | C | A | - | - |
| Zfand2a   | ENSRNOT00000047634 | 15,667,450 | INTRONIC   | T | C | - | - |
| Zfand2a   | ENSRNOT00000047634 | 15,667,540 | INTRONIC   | A | T | - | - |
| Zfand2a   | ENSRNOT00000047634 | 15,667,742 | INTRONIC   | G | A | - | - |
| Zfand2a   | ENSRNOT00000047634 | 15,667,806 | INTRONIC   | A | G | - | - |
| Zfand2a   | ENSRNOT00000047634 | 15,668,020 | INTRONIC   | T | C | - | - |
| Zfand2a   | ENSRNOT00000047634 | 15,668,106 | INTRONIC   | C | T | - | - |
| Zfand2a   | ENSRNOT00000047634 | 15,669,138 | INTRONIC   | G | A | - | - |
| Zfand2a   | ENSRNOT00000047634 | 15,669,251 | INTRONIC   | G | A | - | - |
| Zfand2a   | ENSRNOT00000047634 | 15,669,954 | INTRONIC   | A | G | - | - |
| Zfand2a   | ENSRNOT00000047634 | 15,670,889 | 3PRIME_UTR | G | C | - | - |
| Zfand2a   | ENSRNOT00000047634 | 15,671,208 | 3PRIME_UTR | T | C | - | - |
| Zfand2a   | ENSRNOT00000047634 | 15,671,588 | 3PRIME_UTR | C | T | - | - |
| Zfand2a   | ENSRNOT00000047634 | 15,672,915 | DOWNSTREAM | A | G | - | - |
| Zfand2a   | ENSRNOT00000047634 | 15,673,044 | DOWNSTREAM | C | G | - | - |
| Zfand2a   | ENSRNOT00000047634 | 15,673,052 | DOWNSTREAM | A | G | - | - |
| Zfand2a   | ENSRNOT00000047634 | 15,673,386 | DOWNSTREAM | A | G | - | - |
| Zfand2a   | ENSRNOT00000047634 | 15,673,581 | DOWNSTREAM | T | G | - | - |
| Zfand2a   | ENSRNOT00000047634 | 15,674,328 | DOWNSTREAM | T | C | - | - |
| Zfand2a   | ENSRNOT00000047634 | 15,676,067 | DOWNSTREAM | A | C | - | - |
| Zfand2a   | ENSRNOT00000047634 | 15,676,432 | DOWNSTREAM | G | C | - | - |
| Zfand2a   | ENSRNOT00000047634 | 15,676,702 | DOWNSTREAM | T | C | - | - |
| Zfand2a   | ENSRNOT00000047634 | 15,676,704 | DOWNSTREAM | T | C | - | - |
| Zfand2a   | ENSRNOT00000047634 | 15,677,132 | DOWNSTREAM | G | A | - | - |
| -         |                    | 15,678,293 | INTERGENIC | A | G | - | - |
| -         |                    | 15,678,305 | INTERGENIC | G | A | - | - |
| -         |                    | 15,678,478 | INTERGENIC | C | T | - | - |
| -         |                    | 15,678,527 | INTERGENIC | A | G | - | - |
| -         |                    | 15,678,814 | INTERGENIC | A | G | - | - |
| -         |                    | 15,678,823 | INTERGENIC | C | T | - | - |
| -         |                    | 15,678,888 | INTERGENIC | A | G | - | - |
| -         |                    | 15,679,638 | INTERGENIC | A | G | - | - |
| -         |                    | 15,679,697 | INTERGENIC | A | G | - | - |
| -         |                    | 15,679,711 | INTERGENIC | C | G | - | - |
| -         |                    | 15,679,963 | INTERGENIC | A | G | - | - |
| -         |                    | 15,680,107 | INTERGENIC | A | G | - | - |
| -         |                    | 15,680,184 | INTERGENIC | C | A | - | - |
| -         |                    | 15,680,194 | INTERGENIC | G | A | - | - |
| LOC498154 | ENSRNOT0000001734  | 15,681,478 | UPSTREAM   | C | A | - | - |

|           |                    |            |            |   |   |   |   |
|-----------|--------------------|------------|------------|---|---|---|---|
| LOC498154 | ENSRNOT00000001734 | 15,681,761 | UPSTREAM   | C | A | - | - |
| LOC498154 | ENSRNOT00000001734 | 15,681,776 | UPSTREAM   | A | G | - | - |
| LOC498154 | ENSRNOT00000001734 | 15,681,909 | UPSTREAM   | C | G | - | - |
| LOC498154 | ENSRNOT00000001734 | 15,682,014 | UPSTREAM   | T | G | - | - |
| LOC498154 | ENSRNOT00000001734 | 15,682,522 | UPSTREAM   | T | C | - | - |
| LOC498154 | ENSRNOT00000001734 | 15,682,552 | UPSTREAM   | G | A | - | - |
| LOC498154 | ENSRNOT00000001734 | 15,683,167 | UPSTREAM   | C | T | - | - |
| LOC498154 | ENSRNOT00000001734 | 15,683,670 | UPSTREAM   | T | A | - | - |
| LOC498154 | ENSRNOT00000001734 | 15,683,710 | UPSTREAM   | C | T | - | - |
| LOC498154 | ENSRNOT00000001734 | 15,683,958 | UPSTREAM   | T | C | - | - |
| LOC498154 | ENSRNOT00000001734 | 15,684,032 | UPSTREAM   | T | C | - | - |
| LOC498154 | ENSRNOT00000001734 | 15,685,400 | UPSTREAM   | G | T | - | - |
| LOC498154 | ENSRNOT00000001734 | 15,685,650 | UPSTREAM   | A | G | - | - |
| LOC498154 | ENSRNOT00000001734 | 15,686,190 | UPSTREAM   | C | T | - | - |
| LOC498154 | ENSRNOT00000001734 | 15,686,340 | UPSTREAM   | A | G | - | - |
| LOC498154 | ENSRNOT00000001734 | 15,687,332 | INTRONIC   | G | T | - | - |
| LOC498154 | ENSRNOT00000001734 | 15,687,588 | INTRONIC   | C | T | - | - |
| LOC498154 | ENSRNOT00000001734 | 15,687,649 | INTRONIC   | G | A | - | - |
| LOC498154 | ENSRNOT00000001734 | 15,687,656 | INTRONIC   | T | C | - | - |
| LOC498154 | ENSRNOT00000001734 | 15,687,991 | INTRONIC   | A | G | - | - |
| LOC498154 | ENSRNOT00000001734 | 15,688,189 | INTRONIC   | T | C | - | - |
| LOC498154 | ENSRNOT00000001734 | 15,689,511 | INTRONIC   | T | C | - | - |
| LOC498154 | ENSRNOT00000001734 | 15,689,514 | INTRONIC   | T | G | - | - |
| LOC498154 | ENSRNOT00000001734 | 15,689,576 | INTRONIC   | G | C | - | - |
| LOC498154 | ENSRNOT00000001734 | 15,689,898 | INTRONIC   | T | C | - | - |
| LOC498154 | ENSRNOT00000001734 | 15,690,005 | INTRONIC   | A | G | - | - |
| LOC498154 | ENSRNOT00000001734 | 15,690,132 | INTRONIC   | G | A | - | - |
| LOC498154 | ENSRNOT00000001734 | 15,690,204 | INTRONIC   | G | T | - | - |
| LOC498154 | ENSRNOT00000001734 | 15,690,806 | INTRONIC   | C | G | - | - |
| LOC498154 | ENSRNOT00000001734 | 15,691,035 | INTRONIC   | C | G | - | - |
| LOC498154 | ENSRNOT00000001734 | 15,691,076 | INTRONIC   | G | T | - | - |
| LOC498154 | ENSRNOT00000001734 | 15,691,442 | INTRONIC   | G | A | - | - |
| LOC498154 | ENSRNOT00000001734 | 15,692,253 | INTRONIC   | T | G | - | - |
| LOC498154 | ENSRNOT00000001734 | 15,692,957 | INTRONIC   | T | C | - | - |
| LOC498154 | ENSRNOT00000001734 | 15,692,973 | INTRONIC   | A | G | - | - |
| LOC498154 | ENSRNOT00000001734 | 15,693,154 | INTRONIC   | T | C | - | - |
| LOC498154 | ENSRNOT00000001734 | 15,694,973 | INTRONIC   | T | C | - | - |
| LOC498154 | ENSRNOT00000001734 | 15,695,335 | INTRONIC   | A | G | - | - |
| LOC498154 | ENSRNOT00000001734 | 15,696,956 | INTRONIC   | T | C | - | - |
| LOC498154 | ENSRNOT00000001734 | 15,698,051 | INTRONIC   | T | C | - | - |
| LOC498154 | ENSRNOT00000001734 | 15,699,096 | INTRONIC   | T | C | - | - |
| LOC498154 | ENSRNOT00000001734 | 15,699,199 | INTRONIC   | C | T | - | - |
| LOC498154 | ENSRNOT00000001734 | 15,699,340 | INTRONIC   | T | A | - | - |
| LOC498154 | ENSRNOT00000001734 | 15,700,735 | INTRONIC   | C | T | - | - |
| LOC498154 | ENSRNOT00000001734 | 15,703,734 | INTRONIC   | T | C | - | - |
| LOC498154 | ENSRNOT00000001734 | 15,703,761 | INTRONIC   | C | T | - | - |
| LOC498154 | ENSRNOT00000001734 | 15,704,523 | INTRONIC   | G | A | - | - |
| LOC498154 | ENSRNOT00000001734 | 15,705,540 | INTRONIC   | T | C | - | - |
| LOC498154 | ENSRNOT00000001734 | 15,707,330 | INTRONIC   | A | C | - | - |
| LOC498154 | ENSRNOT00000001734 | 15,707,605 | INTRONIC   | C | A | - | - |
| LOC498154 | ENSRNOT00000001734 | 15,709,283 | INTRONIC   | C | T | - | - |
| LOC498154 | ENSRNOT00000001734 | 15,710,953 | INTRONIC   | C | T | - | - |
| LOC498154 | ENSRNOT00000001734 | 15,711,815 | INTRONIC   | C | T | - | - |
| Gper      | ENSRNOT00000001732 | 15,713,926 | DOWNSTREAM | T | A | - | - |
| Gper      | ENSRNOT00000001732 | 15,714,752 | DOWNSTREAM | G | A | - | - |
| Gper      | ENSRNOT00000001732 | 15,714,861 | DOWNSTREAM | C | G | - | - |
| Gper      | ENSRNOT00000001732 | 15,715,377 | DOWNSTREAM | A | G | - | - |
| Gper      | ENSRNOT00000001732 | 15,716,637 | DOWNSTREAM | G | T | - | - |
| Gper      | ENSRNOT00000001732 | 15,716,800 | DOWNSTREAM | C | T | - | - |
| Gper      | ENSRNOT00000001732 | 15,717,693 | DOWNSTREAM | A | T | - | - |
| Gper      | ENSRNOT00000001732 | 15,718,302 | DOWNSTREAM | C | A | - | - |
| LOC498154 | ENSRNOT00000001734 | 15,719,537 | INTRONIC   | G | A | - | - |
| Gper      | ENSRNOT00000001732 | 15,720,719 | UPSTREAM   | G | A | - | - |
| Gper      | ENSRNOT00000001732 | 15,720,721 | UPSTREAM   | G | A | - | - |
| Gper      | ENSRNOT00000001732 | 15,721,375 | UPSTREAM   | T | C | - | - |
| Gper      | ENSRNOT00000001732 | 15,721,423 | UPSTREAM   | C | G | - | - |
| Gper      | ENSRNOT00000001732 | 15,721,970 | UPSTREAM   | A | G | - | - |
| Gper      | ENSRNOT00000001732 | 15,724,017 | UPSTREAM   | C | G | - | - |
| Gper      | ENSRNOT00000001732 | 15,724,646 | UPSTREAM   | G | A | - | - |
| LOC498154 | ENSRNOT00000001734 | 15,725,188 | INTRONIC   | G | A | - | - |
| LOC498154 | ENSRNOT00000001734 | 15,725,276 | INTRONIC   | T | G | - | - |
| LOC498154 | ENSRNOT00000001734 | 15,725,976 | INTRONIC   | G | A | - | - |
| LOC498154 | ENSRNOT00000001734 | 15,726,145 | INTRONIC   | C | T | - | - |
| LOC498154 | ENSRNOT00000001734 | 15,727,894 | INTRONIC   | T | G | - | - |
| LOC498154 | ENSRNOT00000001734 | 15,728,992 | INTRONIC   | T | C | - | - |
| LOC498154 | ENSRNOT00000001734 | 15,729,164 | INTRONIC   | T | C | - | - |
| LOC498154 | ENSRNOT00000001734 | 15,729,444 | INTRONIC   | C | G | - | - |
| LOC498154 | ENSRNOT00000001734 | 15,730,053 | INTRONIC   | G | T | - | - |
| LOC498154 | ENSRNOT00000001734 | 15,730,996 | INTRONIC   | G | T | - | - |
| LOC498154 | ENSRNOT00000001734 | 15,733,587 | INTRONIC   | C | T | - | - |

|           |                    |            |            |   |   |   |   |
|-----------|--------------------|------------|------------|---|---|---|---|
| LOC498154 | ENSRNOT00000001734 | 15,734,990 | INTRONIC   | C | T | - | - |
| LOC498154 | ENSRNOT00000001734 | 15,736,427 | INTRONIC   | T | C | - | - |
| LOC498154 | ENSRNOT00000001734 | 15,736,849 | INTRONIC   | T | G | - | - |
| LOC498154 | ENSRNOT00000001734 | 15,736,932 | INTRONIC   | G | A | - | - |
| LOC498154 | ENSRNOT00000001734 | 15,737,022 | INTRONIC   | A | T | - | - |
| LOC498154 | ENSRNOT00000001734 | 15,738,666 | INTRONIC   | T | A | - | - |
| LOC498154 | ENSRNOT00000001734 | 15,738,846 | INTRONIC   | A | G | - | - |
| LOC498154 | ENSRNOT00000001734 | 15,739,350 | INTRONIC   | C | T | - | - |
| LOC498154 | ENSRNOT00000001734 | 15,741,748 | INTRONIC   | A | T | - | - |
| LOC498154 | ENSRNOT00000001734 | 15,742,303 | INTRONIC   | G | A | - | - |
| LOC498154 | ENSRNOT00000001734 | 15,742,378 | INTRONIC   | C | T | - | - |
| LOC498154 | ENSRNOT00000001734 | 15,742,520 | INTRONIC   | C | T | - | - |
| LOC498154 | ENSRNOT00000001734 | 15,743,088 | INTRONIC   | A | G | - | - |
| LOC498154 | ENSRNOT00000001734 | 15,743,179 | INTRONIC   | T | C | - | - |
| LOC498154 | ENSRNOT00000001734 | 15,744,989 | INTRONIC   | T | C | - | - |
| LOC498154 | ENSRNOT00000001734 | 15,744,991 | INTRONIC   | G | A | - | - |
| LOC498154 | ENSRNOT00000001734 | 15,745,631 | INTRONIC   | G | A | - | - |
| LOC498154 | ENSRNOT00000001734 | 15,745,963 | INTRONIC   | G | C | - | - |
| LOC498154 | ENSRNOT00000001734 | 15,745,993 | INTRONIC   | G | A | - | - |
| LOC498154 | ENSRNOT00000001734 | 15,746,112 | INTRONIC   | G | A | - | - |
| LOC498154 | ENSRNOT00000001734 | 15,746,404 | INTRONIC   | C | G | - | - |
| LOC498154 | ENSRNOT00000001734 | 15,746,786 | INTRONIC   | C | A | - | - |
| LOC498154 | ENSRNOT00000001734 | 15,746,929 | INTRONIC   | T | C | - | - |
| LOC498154 | ENSRNOT00000001734 | 15,749,031 | INTRONIC   | T | A | - | - |
| LOC498154 | ENSRNOT00000001734 | 15,749,205 | INTRONIC   | G | A | - | - |
| Gpr146    | ENSRNOT00000001733 | 15,750,138 | DOWNSTREAM | G | A | - | - |
| Gpr146    | ENSRNOT00000001733 | 15,750,191 | DOWNSTREAM | G | A | - | - |
| Gpr146    | ENSRNOT00000001733 | 15,750,412 | DOWNSTREAM | T | C | - | - |
| Gpr146    | ENSRNOT00000001733 | 15,750,425 | DOWNSTREAM | A | T | - | - |
| Gpr146    | ENSRNOT00000001733 | 15,750,524 | DOWNSTREAM | C | T | - | - |
| Gpr146    | ENSRNOT00000001733 | 15,750,527 | DOWNSTREAM | T | C | - | - |
| Gpr146    | ENSRNOT00000001733 | 15,750,568 | DOWNSTREAM | G | A | - | - |
| Gpr146    | ENSRNOT00000001733 | 15,750,637 | DOWNSTREAM | G | A | - | - |
| Gpr146    | ENSRNOT00000001733 | 15,750,769 | DOWNSTREAM | T | C | - | - |
| Gpr146    | ENSRNOT00000001733 | 15,750,895 | DOWNSTREAM | A | G | - | - |
| Gpr146    | ENSRNOT00000001733 | 15,751,045 | DOWNSTREAM | A | C | - | - |
| Gpr146    | ENSRNOT00000001733 | 15,751,129 | DOWNSTREAM | C | A | - | - |
| Gpr146    | ENSRNOT00000001733 | 15,751,240 | DOWNSTREAM | T | C | - | - |
| Gpr146    | ENSRNOT00000001733 | 15,751,279 | DOWNSTREAM | G | A | - | - |
| Gpr146    | ENSRNOT00000001733 | 15,751,337 | DOWNSTREAM | T | C | - | - |
| Gpr146    | ENSRNOT00000001733 | 15,751,568 | DOWNSTREAM | C | T | - | - |
| Gpr146    | ENSRNOT00000001733 | 15,751,569 | DOWNSTREAM | C | T | - | - |
| Gpr146    | ENSRNOT00000001733 | 15,751,819 | DOWNSTREAM | T | C | - | - |
| Gpr146    | ENSRNOT00000001733 | 15,752,303 | DOWNSTREAM | C | T | - | - |
| Gpr146    | ENSRNOT00000001733 | 15,752,660 | DOWNSTREAM | T | C | - | - |
| Gpr146    | ENSRNOT00000001733 | 15,753,213 | DOWNSTREAM | A | G | - | - |
| Gpr146    | ENSRNOT00000001733 | 15,753,217 | DOWNSTREAM | A | G | - | - |
| Gpr146    | ENSRNOT00000001733 | 15,753,265 | DOWNSTREAM | G | A | - | - |
| Gpr146    | ENSRNOT00000001733 | 15,753,269 | DOWNSTREAM | G | A | - | - |
| Gpr146    | ENSRNOT00000001733 | 15,753,496 | DOWNSTREAM | G | T | - | - |
| Gpr146    | ENSRNOT00000001733 | 15,753,568 | DOWNSTREAM | C | G | - | - |
| Gpr146    | ENSRNOT00000001733 | 15,753,697 | DOWNSTREAM | A | G | - | - |
| Gpr146    | ENSRNOT00000001733 | 15,753,900 | DOWNSTREAM | C | T | - | - |
| Gpr146    | ENSRNOT00000001733 | 15,753,975 | DOWNSTREAM | T | C | - | - |
| Gpr146    | ENSRNOT00000001733 | 15,754,112 | DOWNSTREAM | T | C | - | - |
| Gpr146    | ENSRNOT00000001733 | 15,754,331 | DOWNSTREAM | T | C | - | - |
| Gpr146    | ENSRNOT00000001733 | 15,754,447 | DOWNSTREAM | T | C | - | - |
| Gpr146    | ENSRNOT00000001733 | 15,755,494 | 3PRIME_UTR | A | G | - | - |
| LOC498154 | ENSRNOT00000001734 | 15,755,576 | INTRONIC   | T | C | - | - |
| LOC498154 | ENSRNOT00000001734 | 15,755,669 | INTRONIC   | T | C | - | - |
| LOC498154 | ENSRNOT00000001734 | 15,756,293 | INTRONIC   | C | T | - | - |
| LOC498154 | ENSRNOT00000001734 | 15,756,367 | INTRONIC   | A | G | - | - |
| Gpr146    | ENSRNOT00000001733 | 15,757,369 | INTRONIC   | T | G | - | - |
| Gpr146    | ENSRNOT00000001733 | 15,758,043 | INTRONIC   | A | G | - | - |
| Gpr146    | ENSRNOT00000001733 | 15,758,136 | INTRONIC   | A | G | - | - |
| Gpr146    | ENSRNOT00000001733 | 15,758,612 | INTRONIC   | T | C | - | - |
| Gpr146    | ENSRNOT00000001733 | 15,760,032 | INTRONIC   | G | A | - | - |
| Gpr146    | ENSRNOT00000001733 | 15,760,256 | INTRONIC   | G | A | - | - |
| Gpr146    | ENSRNOT00000001733 | 15,761,157 | INTRONIC   | C | A | - | - |
| Gpr146    | ENSRNOT00000001733 | 15,761,205 | INTRONIC   | C | T | - | - |
| Gpr146    | ENSRNOT00000001733 | 15,761,218 | INTRONIC   | T | C | - | - |
| Gpr146    | ENSRNOT00000001733 | 15,761,228 | INTRONIC   | C | T | - | - |
| Gpr146    | ENSRNOT00000001733 | 15,761,269 | INTRONIC   | T | C | - | - |
| Gpr146    | ENSRNOT00000001733 | 15,762,267 | INTRONIC   | T | A | - | - |
| Gpr146    | ENSRNOT00000001733 | 15,762,289 | INTRONIC   | A | T | - | - |
| Gpr146    | ENSRNOT00000001733 | 15,762,634 | INTRONIC   | A | G | - | - |
| Gpr146    | ENSRNOT00000001733 | 15,763,641 | INTRONIC   | A | T | - | - |
| Gpr146    | ENSRNOT00000001733 | 15,763,643 | INTRONIC   | T | G | - | - |
| Gpr146    | ENSRNOT00000001733 | 15,763,820 | INTRONIC   | A | G | - | - |
| Gpr146    | ENSRNOT00000001733 | 15,764,483 | INTRONIC   | G | A | - | - |



|           |                     |            |                   |   |   |   |   |
|-----------|---------------------|------------|-------------------|---|---|---|---|
| Gpr146    | ENSRNOT00000001733  | 15,765,631 | INTRONIC          | C | T | - | - |
| Gpr146    | ENSRNOT00000001733  | 15,766,757 | INTRONIC          | G | C | - | - |
| Gpr146    | ENSRNOT00000001733  | 15,766,840 | INTRONIC          | T | C | - | - |
| Gpr146    | ENSRNOT00000001733  | 15,768,087 | UPSTREAM          | A | G | - | - |
| Gpr146    | ENSRNOT00000001733  | 15,768,192 | UPSTREAM          | A | T | - | - |
| Gpr146    | ENSRNOT00000001733  | 15,768,215 | UPSTREAM          | A | G | - | - |
| Gpr146    | ENSRNOT00000001733  | 15,768,555 | UPSTREAM          | C | A | - | - |
| Gpr146    | ENSRNOT00000001733  | 15,769,118 | UPSTREAM          | A | G | - | - |
| Gpr146    | ENSRNOT00000001733  | 15,769,374 | UPSTREAM          | A | C | - | - |
| Gpr146    | ENSRNOT00000001733  | 15,769,888 | UPSTREAM          | A | T | - | - |
| Gpr146    | ENSRNOT00000001733  | 15,770,802 | UPSTREAM          | T | C | - | - |
| Gpr146    | ENSRNOT00000001733  | 15,771,079 | UPSTREAM          | G | A | - | - |
| Gpr146    | ENSRNOT00000001733  | 15,772,120 | UPSTREAM          | T | C | - | - |
| Gpr146    | ENSRNOT00000001733  | 15,772,235 | UPSTREAM          | C | T | - | - |
| Gpr146    | ENSRNOT00000001733  | 15,772,616 | UPSTREAM          | T | C | - | - |
| Gpr146    | ENSRNOT00000001733  | 15,772,909 | UPSTREAM          | G | A | - | - |
| LOC498154 | ENSRNOT00000001734  | 15,773,076 | INTRONIC          | G | A | - | - |
| LOC498154 | ENSRNOT00000001734  | 15,773,141 | INTRONIC          | G | A | - | - |
| LOC498154 | ENSRNOT00000001734  | 15,773,145 | INTRONIC          | G | A | - | - |
| LOC498154 | ENSRNOT00000001734  | 15,774,174 | INTRONIC          | A | T | - | - |
| LOC498154 | ENSRNOT00000001734  | 15,774,266 | INTRONIC          | C | T | - | - |
| LOC498154 | ENSRNOT00000001734  | 15,774,692 | INTRONIC          | G | T | - | - |
| LOC498154 | ENSRNOT00000001734  | 15,778,303 | INTRONIC          | G | A | - | - |
| LOC498154 | ENSRNOT00000001734  | 15,778,502 | INTRONIC          | G | A | - | - |
| LOC498154 | ENSRNOT00000001734  | 15,779,124 | INTRONIC          | T | C | - | - |
| LOC498154 | ENSRNOT00000001734  | 15,780,299 | INTRONIC          | C | G | - | - |
| LOC498154 | ENSRNOT00000001734  | 15,780,425 | INTRONIC          | C | T | - | - |
| LOC498154 | ENSRNOT00000001734  | 15,780,484 | INTRONIC          | A | G | - | - |
| LOC498154 | ENSRNOT00000001734  | 15,780,628 | INTRONIC          | T | C | - | - |
| LOC498154 | ENSRNOT00000001734  | 15,782,258 | INTRONIC          | A | T | - | - |
| LOC498154 | ENSRNOT00000001734  | 15,782,635 | INTRONIC          | A | G | - | - |
| LOC498154 | ENSRNOT00000001734  | 15,782,748 | INTRONIC          | C | T | - | - |
| LOC498154 | ENSRNOT00000001734  | 15,782,924 | INTRONIC          | C | G | - | - |
| LOC498154 | ENSRNOT00000001734  | 15,785,398 | INTRONIC          | C | T | - | - |
| LOC498154 | ENSRNOT00000001734  | 15,785,905 | INTRONIC          | G | A | - | - |
| LOC498154 | ENSRNOT00000001734  | 15,785,965 | INTRONIC          | G | C | - | - |
| LOC498154 | ENSRNOT00000001734  | 15,786,260 | INTRONIC          | G | T | - | - |
| LOC498154 | ENSRNOT00000001734  | 15,786,351 | INTRONIC          | G | A | - | - |
| LOC498154 | ENSRNOT00000001734  | 15,786,457 | INTRONIC          | G | A | - | - |
| LOC498154 | ENSRNOT00000001734  | 15,786,460 | INTRONIC          | T | C | - | - |
| LOC498154 | ENSRNOT00000001734  | 15,786,631 | INTRONIC          | C | T | - | - |
| LOC498154 | ENSRNOT00000001734  | 15,786,803 | INTRONIC          | T | C | - | - |
| LOC498154 | ENSRNOT00000001734  | 15,787,480 | INTRONIC          | G | A | - | - |
| LOC498154 | ENSRNOT00000001734  | 15,787,625 | INTRONIC          | T | C | - | - |
| LOC498154 | ENSRNOT00000001734  | 15,787,914 | INTRONIC          | T | C | - | - |
| LOC498154 | ENSRNOT00000001734  | 15,788,446 | INTRONIC          | G | A | - | - |
| LOC498154 | ENSRNOT00000001734  | 15,788,544 | INTRONIC          | G | A | - | - |
| Cyp2w1    | ENSRNOT000000031264 | 15,788,838 | DOWNSTREAM        | C | T | - | - |
| Cyp2w1    | ENSRNOT000000031264 | 15,788,875 | DOWNSTREAM        | C | T | - | - |
| Cyp2w1    | ENSRNOT000000031264 | 15,788,927 | DOWNSTREAM        | A | G | - | - |
| Cyp2w1    | ENSRNOT000000031264 | 15,788,936 | DOWNSTREAM        | A | G | - | - |
| LOC498154 | ENSRNOT00000001734  | 15,788,997 | 3PRIME_UTR        | G | C | - | - |
| LOC498154 | ENSRNOT00000001734  | 15,789,058 | 3PRIME_UTR        | C | T | - | - |
| LOC498154 | ENSRNOT00000001734  | 15,789,072 | 3PRIME_UTR        | G | T | - | - |
| LOC498154 | ENSRNOT00000001734  | 15,789,107 | 3PRIME_UTR        | C | T | - | - |
| LOC498154 | ENSRNOT00000001734  | 15,789,123 | 3PRIME_UTR        | A | T | - | - |
| LOC498154 | ENSRNOT00000001734  | 15,789,315 | 3PRIME_UTR        | G | C | - | - |
| LOC498154 | ENSRNOT00000001734  | 15,789,438 | 3PRIME_UTR        | A | G | - | - |
| LOC498154 | ENSRNOT00000001734  | 15,789,440 | 3PRIME_UTR        | A | G | - | - |
| LOC498154 | ENSRNOT00000001734  | 15,789,514 | 3PRIME_UTR        | A | G | - | - |
| LOC498154 | ENSRNOT00000001734  | 15,790,177 | DOWNSTREAM        | T | C | - | - |
| LOC498154 | ENSRNOT00000001734  | 15,790,182 | DOWNSTREAM        | C | T | - | - |
| LOC498154 | ENSRNOT00000001734  | 15,790,592 | DOWNSTREAM        | G | A | - | - |
| LOC498154 | ENSRNOT00000001734  | 15,790,843 | DOWNSTREAM        | C | A | - | - |
| LOC498154 | ENSRNOT00000001734  | 15,791,448 | DOWNSTREAM        | C | T | - | - |
| LOC498154 | ENSRNOT00000001734  | 15,792,346 | DOWNSTREAM        | T | C | - | - |
| LOC498154 | ENSRNOT00000001734  | 15,792,409 | DOWNSTREAM        | T | C | - | - |
| LOC498154 | ENSRNOT00000001734  | 15,792,969 | DOWNSTREAM        | T | A | - | - |
| LOC498154 | ENSRNOT00000001734  | 15,794,134 | DOWNSTREAM        | G | A | - | - |
| Cyp2w1    | ENSRNOT000000031264 | 15,794,938 | INTRONIC          | A | G | - | - |
| Cyp2w1    | ENSRNOT000000031264 | 15,796,538 | INTRONIC          | G | A | - | - |
| Cyp2w1    | ENSRNOT000000031264 | 15,797,209 | SYNONYMOUS_CODING | A | G | - | - |
| Cyp2w1    | ENSRNOT000000031264 | 15,797,884 | UPSTREAM          | C | A | - | - |
| Cyp2w1    | ENSRNOT000000031264 | 15,798,291 | UPSTREAM          | A | T | - | - |
| Cyp2w1    | ENSRNOT000000031264 | 15,799,045 | UPSTREAM          | T | A | - | - |
| Cox19     | ENSRNOT00000001735  | 15,799,882 | UPSTREAM          | T | A | - | - |
| Cox19     | ENSRNOT00000001735  | 15,800,236 | UPSTREAM          | C | T | - | - |
| Cox19     | ENSRNOT00000001735  | 15,800,438 | UPSTREAM          | G | A | - | - |
| Cox19     | ENSRNOT00000001735  | 15,800,471 | UPSTREAM          | G | A | - | - |
| Cox19     | ENSRNOT00000001735  | 15,800,525 | UPSTREAM          | A | G | - | - |

|       |                    |            |            |   |   |   |   |
|-------|--------------------|------------|------------|---|---|---|---|
| Cox19 | ENSRNOT00000001735 | 15,800,577 | UPSTREAM   | A | G | - | - |
| Cox19 | ENSRNOT00000001735 | 15,800,779 | UPSTREAM   | A | G | - | - |
| Cox19 | ENSRNOT00000001735 | 15,801,186 | UPSTREAM   | T | C | - | - |
| Cox19 | ENSRNOT00000001735 | 15,801,215 | UPSTREAM   | A | G | - | - |
| Cox19 | ENSRNOT00000001735 | 15,801,726 | UPSTREAM   | T | G | - | - |
| Cox19 | ENSRNOT00000001735 | 15,802,089 | UPSTREAM   | G | A | - | - |
| Cox19 | ENSRNOT00000001735 | 15,802,139 | UPSTREAM   | G | C | - | - |
| Cox19 | ENSRNOT00000001735 | 15,802,331 | UPSTREAM   | G | A | - | - |
| Cox19 | ENSRNOT00000001735 | 15,803,069 | UPSTREAM   | A | G | - | - |
| Cox19 | ENSRNOT00000001735 | 15,803,266 | UPSTREAM   | G | A | - | - |
| Cox19 | ENSRNOT00000001735 | 15,805,366 | INTRONIC   | A | T | - | - |
| Cox19 | ENSRNOT00000001735 | 15,805,852 | INTRONIC   | A | G | - | - |
| Cox19 | ENSRNOT00000001735 | 15,806,090 | INTRONIC   | T | C | - | - |
| Cox19 | ENSRNOT00000001735 | 15,807,182 | INTRONIC   | A | G | - | - |
| Cox19 | ENSRNOT00000001735 | 15,807,205 | INTRONIC   | G | T | - | - |
| Cox19 | ENSRNOT00000001735 | 15,809,490 | INTRONIC   | T | C | - | - |
| Cox19 | ENSRNOT00000001735 | 15,810,781 | INTRONIC   | G | T | - | - |
| Cox19 | ENSRNOT00000001735 | 15,811,180 | INTRONIC   | G | A | - | - |
| Cox19 | ENSRNOT00000001735 | 15,811,560 | 3PRIME_UTR | T | C | - | - |
| Cox19 | ENSRNOT00000001735 | 15,811,584 | 3PRIME_UTR | T | C | - | - |
| Cox19 | ENSRNOT00000001735 | 15,812,118 | 3PRIME_UTR | T | G | - | - |
| Cox19 | ENSRNOT00000001735 | 15,813,069 | DOWNSTREAM | A | G | - | - |
| Cox19 | ENSRNOT00000001735 | 15,813,378 | DOWNSTREAM | C | A | - | - |
| Cox19 | ENSRNOT00000001735 | 15,813,457 | DOWNSTREAM | T | C | - | - |
| Cox19 | ENSRNOT00000001735 | 15,813,863 | DOWNSTREAM | G | A | - | - |
| Cox19 | ENSRNOT00000001735 | 15,814,622 | DOWNSTREAM | C | T | - | - |
| Cox19 | ENSRNOT00000001735 | 15,815,699 | DOWNSTREAM | C | T | - | - |
|       | -                  | 15,817,984 | INTERGENIC | C | G | - | - |
|       | -                  | 15,818,148 | INTERGENIC | G | C | - | - |
|       | -                  | 15,818,991 | INTERGENIC | A | T | - | - |
| Adap1 | ENSRNOT00000001736 | 15,822,360 | UPSTREAM   | G | A | - | - |
| Adap1 | ENSRNOT00000001736 | 15,824,621 | UPSTREAM   | T | G | - | - |
| Adap1 | ENSRNOT00000001736 | 15,824,997 | UPSTREAM   | G | A | - | - |
| Adap1 | ENSRNOT00000001736 | 15,825,829 | INTRONIC   | G | A | - | - |
| Adap1 | ENSRNOT00000001736 | 15,828,367 | INTRONIC   | C | A | - | - |
| Adap1 | ENSRNOT00000001736 | 15,828,465 | INTRONIC   | C | T | - | - |
| Adap1 | ENSRNOT00000001736 | 15,829,485 | INTRONIC   | C | T | - | - |
| Adap1 | ENSRNOT00000001736 | 15,829,863 | INTRONIC   | A | G | - | - |
| Adap1 | ENSRNOT00000001736 | 15,830,128 | INTRONIC   | C | T | - | - |
| Adap1 | ENSRNOT00000001736 | 15,832,424 | INTRONIC   | T | G | - | - |
| Adap1 | ENSRNOT00000001736 | 15,832,662 | INTRONIC   | C | T | - | - |
| Adap1 | ENSRNOT00000001736 | 15,834,457 | INTRONIC   | C | T | - | - |
| Adap1 | ENSRNOT00000001736 | 15,836,795 | INTRONIC   | T | G | - | - |
| Adap1 | ENSRNOT00000001736 | 15,839,286 | INTRONIC   | T | C | - | - |
| Adap1 | ENSRNOT00000001736 | 15,841,670 | INTRONIC   | C | A | - | - |
| Adap1 | ENSRNOT00000001736 | 15,841,704 | INTRONIC   | C | T | - | - |
| Adap1 | ENSRNOT00000001736 | 15,841,723 | INTRONIC   | C | A | - | - |
| Adap1 | ENSRNOT00000001736 | 15,841,809 | INTRONIC   | T | C | - | - |
| Adap1 | ENSRNOT00000001736 | 15,842,897 | INTRONIC   | G | C | - | - |
| Adap1 | ENSRNOT00000001736 | 15,843,550 | INTRONIC   | T | C | - | - |
| Adap1 | ENSRNOT00000001736 | 15,843,788 | INTRONIC   | T | C | - | - |
| Adap1 | ENSRNOT00000001736 | 15,843,826 | INTRONIC   | T | G | - | - |
| Adap1 | ENSRNOT00000001736 | 15,843,841 | INTRONIC   | C | T | - | - |
| Adap1 | ENSRNOT00000001736 | 15,843,894 | INTRONIC   | T | C | - | - |
| Adap1 | ENSRNOT00000001736 | 15,844,453 | INTRONIC   | C | T | - | - |
| Adap1 | ENSRNOT00000001736 | 15,846,458 | INTRONIC   | A | G | - | - |
| Adap1 | ENSRNOT00000001736 | 15,847,297 | INTRONIC   | C | G | - | - |
| Adap1 | ENSRNOT00000001736 | 15,849,664 | INTRONIC   | T | C | - | - |
| Adap1 | ENSRNOT00000001736 | 15,851,364 | INTRONIC   | A | G | - | - |
| Adap1 | ENSRNOT00000001736 | 15,851,832 | INTRONIC   | G | A | - | - |
| Adap1 | ENSRNOT00000001736 | 15,853,588 | INTRONIC   | G | A | - | - |
| Adap1 | ENSRNOT00000001736 | 15,853,627 | INTRONIC   | T | A | - | - |
| Adap1 | ENSRNOT00000001736 | 15,853,685 | INTRONIC   | G | A | - | - |
| Adap1 | ENSRNOT00000001736 | 15,853,693 | INTRONIC   | G | T | - | - |
| Adap1 | ENSRNOT00000001736 | 15,853,746 | INTRONIC   | C | T | - | - |
| Adap1 | ENSRNOT00000001736 | 15,853,782 | INTRONIC   | G | T | - | - |
| Adap1 | ENSRNOT00000001736 | 15,853,789 | INTRONIC   | A | G | - | - |
| Adap1 | ENSRNOT00000001736 | 15,853,820 | INTRONIC   | T | C | - | - |
| Adap1 | ENSRNOT00000001736 | 15,853,822 | INTRONIC   | A | G | - | - |
| Adap1 | ENSRNOT00000001736 | 15,853,861 | INTRONIC   | C | T | - | - |
| Adap1 | ENSRNOT00000001736 | 15,853,906 | INTRONIC   | A | T | - | - |
| Adap1 | ENSRNOT00000001736 | 15,854,147 | INTRONIC   | C | T | - | - |
| Adap1 | ENSRNOT00000001736 | 15,854,148 | INTRONIC   | A | C | - | - |
| Adap1 | ENSRNOT00000001736 | 15,854,241 | INTRONIC   | G | A | - | - |
| Adap1 | ENSRNOT00000001736 | 15,854,323 | INTRONIC   | C | T | - | - |
| Adap1 | ENSRNOT00000001736 | 15,854,414 | INTRONIC   | G | C | - | - |
| Adap1 | ENSRNOT00000001736 | 15,854,456 | INTRONIC   | G | A | - | - |
| Adap1 | ENSRNOT00000001736 | 15,854,468 | INTRONIC   | G | C | - | - |
| Adap1 | ENSRNOT00000001736 | 15,854,581 | INTRONIC   | C | T | - | - |
| Adap1 | ENSRNOT00000001736 | 15,854,759 | INTRONIC   | C | T | - | - |

|       |                    |            |                   |   |   |   |   |
|-------|--------------------|------------|-------------------|---|---|---|---|
| Adap1 | ENSRNOT00000001736 | 15,854,934 | INTRONIC          | C | T | - | - |
| Adap1 | ENSRNOT00000001736 | 15,854,977 | INTRONIC          | A | G | - | - |
| Adap1 | ENSRNOT00000001736 | 15,855,020 | INTRONIC          | A | G | - | - |
| Adap1 | ENSRNOT00000001736 | 15,855,079 | INTRONIC          | A | G | - | - |
| Adap1 | ENSRNOT00000001736 | 15,855,157 | INTRONIC          | T | C | - | - |
| Adap1 | ENSRNOT00000001736 | 15,855,164 | INTRONIC          | C | T | - | - |
| Adap1 | ENSRNOT00000001736 | 15,855,459 | INTRONIC          | C | T | - | - |
| Adap1 | ENSRNOT00000001736 | 15,855,466 | INTRONIC          | G | A | - | - |
| Adap1 | ENSRNOT00000001736 | 15,856,057 | INTRONIC          | T | A | - | - |
| Adap1 | ENSRNOT00000001736 | 15,856,563 | INTRONIC          | T | C | - | - |
| Adap1 | ENSRNOT00000001736 | 15,856,696 | INTRONIC          | T | C | - | - |
| Adap1 | ENSRNOT00000001736 | 15,856,897 | INTRONIC          | C | T | - | - |
| Adap1 | ENSRNOT00000001736 | 15,858,577 | INTRONIC          | A | G | - | - |
| Adap1 | ENSRNOT00000001736 | 15,858,817 | INTRONIC          | T | G | - | - |
| Adap1 | ENSRNOT00000001736 | 15,859,466 | INTRONIC          | A | G | - | - |
| Adap1 | ENSRNOT00000001736 | 15,859,622 | INTRONIC          | T | C | - | - |
| Adap1 | ENSRNOT00000001736 | 15,860,389 | INTRONIC          | C | T | - | - |
| Adap1 | ENSRNOT00000001736 | 15,861,014 | INTRONIC          | A | G | - | - |
| Adap1 | ENSRNOT00000001736 | 15,861,794 | INTRONIC          | A | G | - | - |
| Adap1 | ENSRNOT00000001736 | 15,861,798 | INTRONIC          | A | G | - | - |
| Adap1 | ENSRNOT00000001736 | 15,861,825 | INTRONIC          | T | C | - | - |
| Adap1 | ENSRNOT00000001736 | 15,861,901 | INTRONIC          | C | G | - | - |
| Adap1 | ENSRNOT00000001736 | 15,861,958 | INTRONIC          | G | A | - | - |
| Adap1 | ENSRNOT00000001736 | 15,862,030 | INTRONIC          | C | T | - | - |
| Adap1 | ENSRNOT00000001736 | 15,862,303 | INTRONIC          | T | C | - | - |
| Adap1 | ENSRNOT00000001736 | 15,862,863 | INTRONIC          | C | T | - | - |
| Adap1 | ENSRNOT00000001736 | 15,862,948 | INTRONIC          | G | A | - | - |
| Adap1 | ENSRNOT00000001736 | 15,863,310 | INTRONIC          | G | A | - | - |
| Adap1 | ENSRNOT00000001736 | 15,863,479 | INTRONIC          | A | C | - | - |
| Adap1 | ENSRNOT00000001736 | 15,863,649 | INTRONIC          | G | T | - | - |
| Adap1 | ENSRNOT00000001736 | 15,865,462 | INTRONIC          | G | T | - | - |
| Adap1 | ENSRNOT00000001736 | 15,865,709 | INTRONIC          | G | C | - | - |
| Adap1 | ENSRNOT00000001736 | 15,865,837 | INTRONIC          | T | C | - | - |
| Adap1 | ENSRNOT00000001736 | 15,866,056 | INTRONIC          | T | C | - | - |
| Adap1 | ENSRNOT00000001736 | 15,866,161 | INTRONIC          | T | A | - | - |
| Adap1 | ENSRNOT00000001736 | 15,866,484 | INTRONIC          | T | C | - | - |
| Adap1 | ENSRNOT00000001736 | 15,866,630 | INTRONIC          | G | A | - | - |
| Adap1 | ENSRNOT00000001736 | 15,867,346 | INTRONIC          | G | T | - | - |
| Adap1 | ENSRNOT00000001736 | 15,867,750 | INTRONIC          | C | T | - | - |
| Adap1 | ENSRNOT00000001736 | 15,868,066 | INTRONIC          | G | T | - | - |
| Adap1 | ENSRNOT00000001736 | 15,869,334 | INTRONIC          | C | T | - | - |
| Adap1 | ENSRNOT00000001736 | 15,869,897 | SYNONYMOUS_CODING | C | T | - | - |
| Adap1 | ENSRNOT00000001736 | 15,870,427 | INTRONIC          | C | T | - | - |
| Adap1 | ENSRNOT00000001736 | 15,871,135 | SYNONYMOUS_CODING | T | C | - | - |
| Adap1 | ENSRNOT00000001736 | 15,871,841 | INTRONIC          | T | C | - | - |
| Adap1 | ENSRNOT00000001736 | 15,871,863 | INTRONIC          | T | C | - | - |
| Adap1 | ENSRNOT00000001736 | 15,871,886 | INTRONIC          | C | G | - | - |
| Adap1 | ENSRNOT00000001736 | 15,871,895 | INTRONIC          | T | C | - | - |
| Adap1 | ENSRNOT00000001736 | 15,871,991 | INTRONIC          | C | T | - | - |
| Adap1 | ENSRNOT00000001736 | 15,872,229 | INTRONIC          | G | A | - | - |
| Adap1 | ENSRNOT00000001736 | 15,873,552 | INTRONIC          | A | G | - | - |
| Adap1 | ENSRNOT00000001736 | 15,873,953 | INTRONIC          | C | T | - | - |
| Adap1 | ENSRNOT00000001736 | 15,874,268 | INTRONIC          | A | G | - | - |
| Adap1 | ENSRNOT00000001736 | 15,876,357 | INTRONIC          | G | A | - | - |
| Adap1 | ENSRNOT00000001736 | 15,876,397 | INTRONIC          | T | G | - | - |
| Adap1 | ENSRNOT00000001736 | 15,876,557 | 3PRIME_UTR        | C | A | - | - |
| Adap1 | ENSRNOT00000001736 | 15,876,703 | 3PRIME_UTR        | C | T | - | - |
| Adap1 | ENSRNOT00000001736 | 15,882,032 | DOWNSTREAM        | C | A | - | - |
| Cee   | ENSRNOT00000001745 | 15,883,935 | INTRONIC          | G | A | - | - |
| Cee   | ENSRNOT00000001745 | 15,884,071 | INTRONIC          | A | G | - | - |
| Cee   | ENSRNOT00000001745 | 15,885,034 | SYNONYMOUS_CODING | G | A | - | - |
| Cee   | ENSRNOT00000001745 | 15,886,803 | INTRONIC          | C | T | - | - |
| Cee   | ENSRNOT00000001745 | 15,887,392 | INTRONIC          | A | T | - | - |
| Cee   | ENSRNOT00000001745 | 15,887,461 | INTRONIC          | C | G | - | - |
| Cee   | ENSRNOT00000001745 | 15,888,552 | INTRONIC          | T | C | - | - |
| Cee   | ENSRNOT00000001745 | 15,888,676 | INTRONIC          | C | T | - | - |
| Cee   | ENSRNOT00000001745 | 15,889,150 | INTRONIC          | C | T | - | - |
| Cee   | ENSRNOT00000001745 | 15,889,182 | INTRONIC          | C | T | - | - |
| Cee   | ENSRNOT00000001745 | 15,889,567 | INTRONIC          | G | A | - | - |
| Cee   | ENSRNOT00000001745 | 15,890,425 | INTRONIC          | T | C | - | - |
| Cee   | ENSRNOT00000001745 | 15,890,498 | INTRONIC          | C | T | - | - |
| Cee   | ENSRNOT00000001745 | 15,890,544 | INTRONIC          | T | C | - | - |
| Cee   | ENSRNOT00000001745 | 15,890,776 | INTRONIC          | G | A | - | - |
| Cee   | ENSRNOT00000001745 | 15,890,999 | INTRONIC          | C | T | - | - |
| Cee   | ENSRNOT00000001745 | 15,891,133 | INTRONIC          | T | A | - | - |
| Cee   | ENSRNOT00000001745 | 15,891,193 | INTRONIC          | C | T | - | - |
| Cee   | ENSRNOT00000001745 | 15,891,503 | INTRONIC          | G | A | - | - |
| Cee   | ENSRNOT00000001745 | 15,891,895 | INTRONIC          | A | G | - | - |
| Cee   | ENSRNOT00000001745 | 15,891,926 | INTRONIC          | T | C | - | - |
| Cee   | ENSRNOT00000001745 | 15,892,728 | INTRONIC          | C | T | - | - |

|        |                    |            |                   |   |   |   |   |
|--------|--------------------|------------|-------------------|---|---|---|---|
| Cee    | ENSRNOT00000001745 | 15,893,096 | INTRONIC          | A | C | - | - |
| Cee    | ENSRNOT00000001745 | 15,893,289 | INTRONIC          | A | G | - | - |
| Cee    | ENSRNOT00000001745 | 15,893,355 | INTRONIC          | T | C | - | - |
| Cee    | ENSRNOT00000001745 | 15,893,838 | INTRONIC          | C | A | - | - |
| Cee    | ENSRNOT00000001745 | 15,893,858 | INTRONIC          | C | T | - | - |
| Cee    | ENSRNOT00000001745 | 15,895,057 | INTRONIC          | T | C | - | - |
| Cee    | ENSRNOT00000001745 | 15,895,070 | INTRONIC          | A | G | - | - |
| Cee    | ENSRNOT00000001745 | 15,895,153 | INTRONIC          | T | A | - | - |
| Cee    | ENSRNOT00000001745 | 15,895,727 | UPSTREAM          | A | G | - | - |
| Cee    | ENSRNOT00000001745 | 15,896,179 | UPSTREAM          | A | C | - | - |
| Cee    | ENSRNOT00000001745 | 15,896,254 | UPSTREAM          | T | A | - | - |
| Cee    | ENSRNOT00000001745 | 15,896,453 | UPSTREAM          | C | T | - | - |
| Cee    | ENSRNOT00000001745 | 15,897,160 | UPSTREAM          | T | C | - | - |
| Cee    | ENSRNOT00000001745 | 15,897,195 | UPSTREAM          | T | C | - | - |
| Cee    | ENSRNOT00000001745 | 15,897,306 | UPSTREAM          | G | A | - | - |
| Cee    | ENSRNOT00000001745 | 15,897,629 | UPSTREAM          | A | T | - | - |
| Cee    | ENSRNOT00000001745 | 15,898,530 | UPSTREAM          | A | G | - | - |
| Cee    | ENSRNOT00000001745 | 15,898,916 | UPSTREAM          | G | T | - | - |
| Cee    | ENSRNOT00000001745 | 15,899,696 | UPSTREAM          | T | C | - | - |
| Unc84a | ENSRNOT00000001748 | 15,900,711 | INTRONIC          | C | T | - | - |
| Unc84a | ENSRNOT00000001748 | 15,900,712 | INTRONIC          | A | G | - | - |
| Unc84a | ENSRNOT00000001748 | 15,900,819 | INTRONIC          | C | G | - | - |
| Unc84a | ENSRNOT00000001748 | 15,901,070 | INTRONIC          | G | A | - | - |
| Unc84a | ENSRNOT00000001748 | 15,901,514 | INTRONIC          | T | C | - | - |
| Unc84a | ENSRNOT00000001748 | 15,902,205 | SYNONYMOUS_CODING | T | C | - | - |
| Unc84a | ENSRNOT00000001748 | 15,902,830 | INTRONIC          | C | G | - | - |
| Unc84a | ENSRNOT00000001748 | 15,902,863 | INTRONIC          | A | G | - | - |
| Unc84a | ENSRNOT00000001748 | 15,903,136 | INTRONIC          | A | G | - | - |
| Unc84a | ENSRNOT00000001748 | 15,903,270 | INTRONIC          | G | A | - | - |
| Unc84a | ENSRNOT00000001748 | 15,904,128 | INTRONIC          | T | A | - | - |
| Unc84a | ENSRNOT00000001748 | 15,904,521 | INTRONIC          | G | A | - | - |
| Unc84a | ENSRNOT00000001748 | 15,905,120 | INTRONIC          | T | C | - | - |
| Unc84a | ENSRNOT00000001748 | 15,907,202 | INTRONIC          | T | C | - | - |
| Unc84a | ENSRNOT00000001748 | 15,907,230 | INTRONIC          | C | T | - | - |
| Unc84a | ENSRNOT00000001748 | 15,907,460 | INTRONIC          | A | G | - | - |
| Unc84a | ENSRNOT00000001748 | 15,907,503 | INTRONIC          | G | A | - | - |
| Unc84a | ENSRNOT00000001748 | 15,908,192 | INTRONIC          | C | A | - | - |
| Unc84a | ENSRNOT00000001748 | 15,908,264 | INTRONIC          | T | A | - | - |
| Unc84a | ENSRNOT00000001748 | 15,908,370 | INTRONIC          | G | T | - | - |
| Unc84a | ENSRNOT00000001748 | 15,909,034 | INTRONIC          | C | T | - | - |
| Unc84a | ENSRNOT00000001748 | 15,909,918 | INTRONIC          | C | T | - | - |
| Unc84a | ENSRNOT00000001748 | 15,910,615 | INTRONIC          | T | C | - | - |
| Unc84a | ENSRNOT00000001748 | 15,910,823 | INTRONIC          | C | G | - | - |
| Unc84a | ENSRNOT00000001748 | 15,911,203 | INTRONIC          | T | C | - | - |
| Unc84a | ENSRNOT00000001748 | 15,911,316 | INTRONIC          | G | C | - | - |
| Unc84a | ENSRNOT00000001748 | 15,911,760 | INTRONIC          | T | C | - | - |
| Unc84a | ENSRNOT00000001748 | 15,911,795 | INTRONIC          | G | A | - | - |
| Unc84a | ENSRNOT00000001748 | 15,911,859 | INTRONIC          | T | C | - | - |
| Unc84a | ENSRNOT00000001748 | 15,912,409 | INTRONIC          | C | T | - | - |
| Unc84a | ENSRNOT00000001748 | 15,912,539 | INTRONIC          | T | C | - | - |
| Unc84a | ENSRNOT00000001748 | 15,912,696 | INTRONIC          | A | G | - | - |
| Unc84a | ENSRNOT00000047287 | 15,913,370 | INTRONIC          | T | G | - | - |
| Unc84a | ENSRNOT00000001748 | 15,913,483 | INTRONIC          | T | C | - | - |
| Unc84a | ENSRNOT00000001748 | 15,913,504 | INTRONIC          | G | T | - | - |
| Unc84a | ENSRNOT00000001748 | 15,913,505 | INTRONIC          | C | G | - | - |
| Unc84a | ENSRNOT00000001748 | 15,914,411 | INTRONIC          | C | T | - | - |
| Unc84a | ENSRNOT00000001748 | 15,914,778 | INTRONIC          | T | C | - | - |
| Unc84a | ENSRNOT00000001748 | 15,914,859 | INTRONIC          | A | T | - | - |
| Unc84a | ENSRNOT00000001748 | 15,914,861 | INTRONIC          | C | T | - | - |
| Unc84a | ENSRNOT00000001748 | 15,915,343 | INTRONIC          | C | T | - | - |
| Unc84a | ENSRNOT00000001748 | 15,917,911 | INTRONIC          | G | T | - | - |
| Unc84a | ENSRNOT00000001748 | 15,920,369 | INTRONIC          | G | A | - | - |
| Unc84a | ENSRNOT00000001748 | 15,920,397 | INTRONIC          | T | A | - | - |
| Unc84a | ENSRNOT00000001748 | 15,924,766 | INTRONIC          | C | T | - | - |
| Unc84a | ENSRNOT00000001748 | 15,925,636 | INTRONIC          | T | C | - | - |
| Unc84a | ENSRNOT00000001748 | 15,926,140 | INTRONIC          | C | T | - | - |
| Unc84a | ENSRNOT00000001748 | 15,928,239 | INTRONIC          | C | T | - | - |
| Unc84a | ENSRNOT00000001748 | 15,928,596 | INTRONIC          | T | C | - | - |
| Unc84a | ENSRNOT00000001748 | 15,929,136 | INTRONIC          | G | A | - | - |
| Unc84a | ENSRNOT00000001748 | 15,934,376 | UPSTREAM          | A | G | - | - |
| Unc84a | ENSRNOT00000001748 | 15,935,758 | UPSTREAM          | T | C | - | - |
| -      | -                  | 15,937,030 | INTERGENIC        | C | T | - | - |
| -      | -                  | 15,937,573 | INTERGENIC        | C | T | - | - |
| -      | -                  | 15,937,769 | INTERGENIC        | T | A | - | - |
| -      | -                  | 15,939,865 | INTERGENIC        | A | G | - | - |
| -      | -                  | 15,939,950 | INTERGENIC        | C | T | - | - |
| -      | -                  | 15,940,226 | INTERGENIC        | G | A | - | - |
| -      | -                  | 15,940,932 | INTERGENIC        | A | G | - | - |
| -      | -                  | 15,941,164 | INTERGENIC        | A | G | - | - |
| -      | -                  | 15,941,634 | INTERGENIC        | G | A | - | - |

|        |                    |            |                   |   |   |   |   |
|--------|--------------------|------------|-------------------|---|---|---|---|
|        | -                  | 15,941,974 | INTERGENIC        | T | G | - | - |
|        | -                  | 15,942,853 | INTERGENIC        | A | G | - | - |
|        | -                  | 15,943,728 | INTERGENIC        | G | C | - | - |
|        | -                  | 15,944,223 | INTERGENIC        | T | G | - | - |
|        | -                  | 15,944,259 | INTERGENIC        | A | G | - | - |
|        | -                  | 15,944,279 | INTERGENIC        | C | A | - | - |
|        | -                  | 15,944,442 | INTERGENIC        | C | T | - | - |
|        | -                  | 15,944,747 | INTERGENIC        | C | T | - | - |
|        | -                  | 15,945,781 | INTERGENIC        | A | T | - | - |
|        | -                  | 15,945,860 | INTERGENIC        | T | G | - | - |
|        | -                  | 15,947,280 | INTERGENIC        | T | C | - | - |
|        | -                  | 15,948,444 | INTERGENIC        | G | C | - | - |
|        | -                  | 15,948,856 | INTERGENIC        | G | A | - | - |
|        | -                  | 15,950,046 | INTERGENIC        | G | A | - | - |
|        | -                  | 15,950,099 | INTERGENIC        | T | C | - | - |
|        | -                  | 15,951,576 | INTERGENIC        | G | T | - | - |
| Heatr2 | ENSRNOT00000035545 | 15,951,670 | DOWNSTREAM        | C | T | - | - |
| Heatr2 | ENSRNOT00000035545 | 15,951,837 | DOWNSTREAM        | C | T | - | - |
| Heatr2 | ENSRNOT00000035545 | 15,952,552 | DOWNSTREAM        | T | A | - | - |
| Heatr2 | ENSRNOT00000035545 | 15,952,577 | DOWNSTREAM        | G | C | - | - |
| Heatr2 | ENSRNOT00000035545 | 15,953,086 | DOWNSTREAM        | C | T | - | - |
| Heatr2 | ENSRNOT00000035545 | 15,955,138 | DOWNSTREAM        | T | C | - | - |
| Heatr2 | ENSRNOT00000035545 | 15,956,745 | 3PRIME_UTR        | G | A | - | - |
| Heatr2 | ENSRNOT00000035545 | 15,958,536 | INTRONIC          | G | A | - | - |
| Heatr2 | ENSRNOT00000035545 | 15,958,885 | INTRONIC          | C | G | - | - |
| Heatr2 | ENSRNOT00000035545 | 15,959,503 | INTRONIC          | T | C | - | - |
| Heatr2 | ENSRNOT00000035545 | 15,960,865 | INTRONIC          | C | A | - | - |
| Heatr2 | ENSRNOT00000035545 | 15,961,225 | INTRONIC          | G | A | - | - |
| Heatr2 | ENSRNOT00000035545 | 15,961,528 | INTRONIC          | A | G | - | - |
| Heatr2 | ENSRNOT00000035545 | 15,961,884 | SYNONYMOUS_CODING | T | C | - | - |
| Heatr2 | ENSRNOT00000035545 | 15,963,216 | INTRONIC          | T | C | - | - |
| Heatr2 | ENSRNOT00000035545 | 15,963,424 | INTRONIC          | T | C | - | - |
| Heatr2 | ENSRNOT00000035545 | 15,963,841 | INTRONIC          | G | C | - | - |
| Heatr2 | ENSRNOT00000035545 | 15,964,286 | INTRONIC          | A | C | - | - |
| Heatr2 | ENSRNOT00000035545 | 15,964,569 | INTRONIC          | G | A | - | - |
| Heatr2 | ENSRNOT00000035545 | 15,964,677 | INTRONIC          | C | T | - | - |
| Heatr2 | ENSRNOT00000035545 | 15,964,902 | INTRONIC          | T | C | - | - |
| Heatr2 | ENSRNOT00000035545 | 15,964,978 | INTRONIC          | G | A | - | - |
| Heatr2 | ENSRNOT00000035545 | 15,965,482 | INTRONIC          | T | C | - | - |
| Heatr2 | ENSRNOT00000035545 | 15,965,542 | INTRONIC          | G | A | - | - |
| Heatr2 | ENSRNOT00000035545 | 15,966,268 | INTRONIC          | A | G | - | - |
| Heatr2 | ENSRNOT00000035545 | 15,966,448 | SYNONYMOUS_CODING | C | T | - | - |
| Heatr2 | ENSRNOT00000035545 | 15,966,704 | INTRONIC          | A | G | - | - |
| Heatr2 | ENSRNOT00000035545 | 15,966,971 | INTRONIC          | A | G | - | - |
| Heatr2 | ENSRNOT00000035545 | 15,967,061 | INTRONIC          | A | G | - | - |
| Heatr2 | ENSRNOT00000035545 | 15,967,376 | INTRONIC          | A | G | - | - |
| Heatr2 | ENSRNOT00000035545 | 15,968,145 | INTRONIC          | C | T | - | - |
| Heatr2 | ENSRNOT00000035545 | 15,968,311 | INTRONIC          | A | G | - | - |
| Heatr2 | ENSRNOT00000035545 | 15,968,434 | INTRONIC          | C | T | - | - |
| Heatr2 | ENSRNOT00000035545 | 15,968,553 | INTRONIC          | A | C | - | - |
| Heatr2 | ENSRNOT00000035545 | 15,968,637 | INTRONIC          | G | A | - | - |
| Heatr2 | ENSRNOT00000035545 | 15,969,422 | INTRONIC          | T | C | - | - |
| Heatr2 | ENSRNOT00000035545 | 15,969,435 | INTRONIC          | G | A | - | - |
| Heatr2 | ENSRNOT00000035545 | 15,969,449 | INTRONIC          | A | G | - | - |
| Heatr2 | ENSRNOT00000035545 | 15,970,299 | INTRONIC          | A | T | - | - |
| Heatr2 | ENSRNOT00000035545 | 15,970,519 | INTRONIC          | T | C | - | - |
| Heatr2 | ENSRNOT00000035545 | 15,971,051 | INTRONIC          | A | G | - | - |
| Heatr2 | ENSRNOT00000035545 | 15,971,484 | INTRONIC          | A | T | - | - |
| Heatr2 | ENSRNOT00000035545 | 15,971,694 | INTRONIC          | A | G | - | - |
| Heatr2 | ENSRNOT00000035545 | 15,972,411 | INTRONIC          | T | C | - | - |
| Heatr2 | ENSRNOT00000035545 | 15,972,710 | INTRONIC          | G | A | - | - |
| Heatr2 | ENSRNOT00000035545 | 15,972,871 | INTRONIC          | T | C | - | - |
| Heatr2 | ENSRNOT00000035545 | 15,973,096 | INTRONIC          | A | G | - | - |
| Heatr2 | ENSRNOT00000035545 | 15,973,185 | INTRONIC          | A | G | - | - |
| Heatr2 | ENSRNOT00000035545 | 15,973,222 | INTRONIC          | C | T | - | - |
| Heatr2 | ENSRNOT00000035545 | 15,973,229 | INTRONIC          | T | G | - | - |
| Heatr2 | ENSRNOT00000035545 | 15,973,961 | INTRONIC          | T | C | - | - |
| Heatr2 | ENSRNOT00000035545 | 15,974,046 | INTRONIC          | C | T | - | - |
| Heatr2 | ENSRNOT00000035545 | 15,974,158 | INTRONIC          | C | T | - | - |
| Heatr2 | ENSRNOT00000035545 | 15,974,159 | INTRONIC          | A | G | - | - |
| Heatr2 | ENSRNOT00000035545 | 15,976,283 | INTRONIC          | C | T | - | - |
| Heatr2 | ENSRNOT00000035545 | 15,976,808 | INTRONIC          | G | A | - | - |
| Heatr2 | ENSRNOT00000035545 | 15,977,225 | INTRONIC          | C | T | - | - |
| Heatr2 | ENSRNOT00000035545 | 15,977,597 | INTRONIC          | T | A | - | - |
| Heatr2 | ENSRNOT00000035545 | 15,979,560 | INTRONIC          | T | C | - | - |
| Heatr2 | ENSRNOT00000035545 | 15,980,168 | INTRONIC          | C | A | - | - |
| Heatr2 | ENSRNOT00000035545 | 15,980,345 | INTRONIC          | C | G | - | - |
| Heatr2 | ENSRNOT00000035545 | 15,980,634 | INTRONIC          | A | G | - | - |
| Heatr2 | ENSRNOT00000035545 | 15,981,330 | INTRONIC          | T | C | - | - |
| Heatr2 | ENSRNOT00000035545 | 15,982,146 | INTRONIC          | A | G | - | - |

|         |                    |            |            |   |   |   |   |
|---------|--------------------|------------|------------|---|---|---|---|
| Heatr2  | ENSRNOT00000035545 | 15,982,233 | INTRONIC   | T | C | - | - |
| Heatr2  | ENSRNOT00000035545 | 15,982,491 | INTRONIC   | G | A | - | - |
| Heatr2  | ENSRNOT00000035545 | 15,983,204 | INTRONIC   | G | T | - | - |
| Heatr2  | ENSRNOT00000035545 | 15,983,205 | INTRONIC   | A | T | - | - |
| Heatr2  | ENSRNOT00000035545 | 15,983,479 | INTRONIC   | C | A | - | - |
| Heatr2  | ENSRNOT00000035545 | 15,983,677 | INTRONIC   | A | C | - | - |
| Heatr2  | ENSRNOT00000035545 | 15,984,333 | INTRONIC   | A | C | - | - |
| Heatr2  | ENSRNOT00000035545 | 15,985,628 | INTRONIC   | G | A | - | - |
| Heatr2  | ENSRNOT00000035545 | 15,988,047 | INTRONIC   | G | A | - | - |
| Heatr2  | ENSRNOT00000035545 | 15,988,391 | INTRONIC   | C | T | - | - |
| Heatr2  | ENSRNOT00000035545 | 15,989,263 | INTRONIC   | G | A | - | - |
| Heatr2  | ENSRNOT00000035545 | 15,989,266 | INTRONIC   | G | A | - | - |
| Heatr2  | ENSRNOT00000035545 | 15,989,427 | INTRONIC   | T | G | - | - |
| Heatr2  | ENSRNOT00000035545 | 15,990,477 | INTRONIC   | G | A | - | - |
| Heatr2  | ENSRNOT00000035545 | 15,990,691 | INTRONIC   | A | T | - | - |
| Heatr2  | ENSRNOT00000035545 | 15,992,353 | INTRONIC   | G | A | - | - |
| Heatr2  | ENSRNOT00000035545 | 15,992,415 | INTRONIC   | T | C | - | - |
| Heatr2  | ENSRNOT00000035545 | 15,993,740 | INTRONIC   | T | A | - | - |
| Heatr2  | ENSRNOT00000035545 | 15,998,469 | UPSTREAM   | A | G | - | - |
| Heatr2  | ENSRNOT00000035545 | 15,998,863 | UPSTREAM   | C | A | - | - |
| Heatr2  | ENSRNOT00000035545 | 15,998,876 | UPSTREAM   | G | A | - | - |
| Heatr2  | ENSRNOT00000035545 | 15,999,011 | UPSTREAM   | T | C | - | - |
| Heatr2  | ENSRNOT00000035545 | 15,999,076 | UPSTREAM   | A | G | - | - |
| Heatr2  | ENSRNOT00000035545 | 15,999,616 | UPSTREAM   | A | G | - | - |
| -       | -                  | 16,001,418 | INTERGENIC | A | T | - | - |
| -       | -                  | 16,001,603 | INTERGENIC | C | G | - | - |
| -       | -                  | 16,002,320 | INTERGENIC | C | G | - | - |
| -       | -                  | 16,002,605 | INTERGENIC | C | T | - | - |
| -       | -                  | 16,004,168 | INTERGENIC | G | A | - | - |
| -       | -                  | 16,005,514 | INTERGENIC | C | G | - | - |
| -       | -                  | 16,005,870 | INTERGENIC | G | A | - | - |
| -       | -                  | 16,005,915 | INTERGENIC | T | C | - | - |
| -       | -                  | 16,006,113 | INTERGENIC | C | T | - | - |
| -       | -                  | 16,006,885 | INTERGENIC | A | G | - | - |
| -       | -                  | 16,007,506 | INTERGENIC | T | C | - | - |
| -       | -                  | 16,008,158 | INTERGENIC | C | T | - | - |
| -       | -                  | 16,008,275 | INTERGENIC | T | C | - | - |
| -       | -                  | 16,008,276 | INTERGENIC | C | T | - | - |
| -       | -                  | 16,008,310 | INTERGENIC | A | T | - | - |
| -       | -                  | 16,008,320 | INTERGENIC | T | C | - | - |
| -       | -                  | 16,008,406 | INTERGENIC | C | A | - | - |
| -       | -                  | 16,008,489 | INTERGENIC | G | C | - | - |
| -       | -                  | 16,008,511 | INTERGENIC | C | G | - | - |
| -       | -                  | 16,008,586 | INTERGENIC | A | C | - | - |
| -       | -                  | 16,008,661 | INTERGENIC | A | T | - | - |
| -       | -                  | 16,008,980 | INTERGENIC | G | A | - | - |
| -       | -                  | 16,008,982 | INTERGENIC | A | G | - | - |
| -       | -                  | 16,009,236 | INTERGENIC | T | C | - | - |
| -       | -                  | 16,009,719 | INTERGENIC | G | T | - | - |
| -       | -                  | 16,009,870 | INTERGENIC | C | T | - | - |
| -       | -                  | 16,009,877 | INTERGENIC | G | T | - | - |
| -       | -                  | 16,010,653 | INTERGENIC | C | T | - | - |
| -       | -                  | 16,010,918 | INTERGENIC | G | A | - | - |
| -       | -                  | 16,011,244 | INTERGENIC | A | G | - | - |
| -       | -                  | 16,011,740 | INTERGENIC | G | A | - | - |
| -       | -                  | 16,011,928 | INTERGENIC | C | T | - | - |
| -       | -                  | 16,012,171 | INTERGENIC | T | A | - | - |
| -       | -                  | 16,013,547 | INTERGENIC | C | A | - | - |
| -       | -                  | 16,013,753 | INTERGENIC | C | T | - | - |
| -       | -                  | 16,014,048 | INTERGENIC | T | C | - | - |
| -       | -                  | 16,014,692 | INTERGENIC | C | A | - | - |
| -       | -                  | 16,015,180 | INTERGENIC | A | T | - | - |
| -       | -                  | 16,015,183 | INTERGENIC | T | A | - | - |
| -       | -                  | 16,016,126 | INTERGENIC | T | C | - | - |
| -       | -                  | 16,016,538 | INTERGENIC | G | A | - | - |
| -       | -                  | 16,016,840 | INTERGENIC | G | A | - | - |
| -       | -                  | 16,016,847 | INTERGENIC | T | C | - | - |
| -       | -                  | 16,016,883 | INTERGENIC | C | T | - | - |
| -       | -                  | 16,016,897 | INTERGENIC | G | A | - | - |
| -       | -                  | 16,018,246 | INTERGENIC | G | C | - | - |
| -       | -                  | 16,020,569 | INTERGENIC | G | A | - | - |
| Prkar1b | ENSRNOT00000031896 | 16,020,954 | UPSTREAM   | G | A | - | - |
| Prkar1b | ENSRNOT00000031896 | 16,023,062 | UPSTREAM   | G | C | - | - |
| Prkar1b | ENSRNOT00000031896 | 16,023,065 | UPSTREAM   | T | G | - | - |
| Prkar1b | ENSRNOT00000031896 | 16,023,164 | UPSTREAM   | T | A | - | - |
| Prkar1b | ENSRNOT00000031896 | 16,023,502 | UPSTREAM   | A | G | - | - |
| Prkar1b | ENSRNOT00000031896 | 16,023,662 | UPSTREAM   | G | A | - | - |
| Prkar1b | ENSRNOT00000031896 | 16,023,708 | UPSTREAM   | C | T | - | - |
| Prkar1b | ENSRNOT00000031896 | 16,024,269 | UPSTREAM   | C | G | - | - |
| Prkar1b | ENSRNOT00000031896 | 16,024,363 | UPSTREAM   | A | T | - | - |

|         |                    |            |                   |   |   |   |   |
|---------|--------------------|------------|-------------------|---|---|---|---|
| Prkar1b | ENSRNOT00000031896 | 16,024,392 | UPSTREAM          | A | T | - | - |
| Prkar1b | ENSRNOT00000031896 | 16,025,562 | UPSTREAM          | G | A | - | - |
| Prkar1b | ENSRNOT00000031896 | 16,026,760 | INTRONIC          | A | G | - | - |
| Prkar1b | ENSRNOT00000031896 | 16,026,785 | INTRONIC          | G | A | - | - |
| Prkar1b | ENSRNOT00000031896 | 16,027,069 | INTRONIC          | C | T | - | - |
| Prkar1b | ENSRNOT00000031896 | 16,027,939 | INTRONIC          | A | G | - | - |
| Prkar1b | ENSRNOT00000031896 | 16,027,983 | INTRONIC          | G | A | - | - |
| Prkar1b | ENSRNOT00000031896 | 16,027,989 | INTRONIC          | T | C | - | - |
| Prkar1b | ENSRNOT00000031896 | 16,028,610 | INTRONIC          | A | G | - | - |
| Prkar1b | ENSRNOT00000031896 | 16,028,628 | INTRONIC          | T | G | - | - |
| Prkar1b | ENSRNOT00000031896 | 16,029,254 | SYNONYMOUS_CODING | A | G | - | - |
| Prkar1b | ENSRNOT00000031896 | 16,029,416 | INTRONIC          | G | A | - | - |
| Prkar1b | ENSRNOT00000031896 | 16,029,433 | INTRONIC          | G | A | - | - |
| Prkar1b | ENSRNOT00000031896 | 16,029,897 | INTRONIC          | C | T | - | - |
| Prkar1b | ENSRNOT00000031896 | 16,029,980 | INTRONIC          | A | G | - | - |
| Prkar1b | ENSRNOT00000031896 | 16,030,041 | INTRONIC          | C | T | - | - |
| Prkar1b | ENSRNOT00000031896 | 16,030,053 | INTRONIC          | C | A | - | - |
| Prkar1b | ENSRNOT00000031896 | 16,030,094 | INTRONIC          | C | T | - | - |
| Prkar1b | ENSRNOT00000031896 | 16,030,157 | INTRONIC          | T | C | - | - |
| Prkar1b | ENSRNOT00000031896 | 16,030,211 | INTRONIC          | A | G | - | - |
| Prkar1b | ENSRNOT00000031896 | 16,031,341 | INTRONIC          | T | C | - | - |
| Prkar1b | ENSRNOT00000031896 | 16,031,744 | INTRONIC          | C | T | - | - |
| Prkar1b | ENSRNOT00000031896 | 16,032,604 | INTRONIC          | A | G | - | - |
| Prkar1b | ENSRNOT00000031896 | 16,032,876 | INTRONIC          | A | G | - | - |
| Prkar1b | ENSRNOT00000031896 | 16,033,673 | INTRONIC          | T | A | - | - |
| Prkar1b | ENSRNOT00000031896 | 16,033,790 | INTRONIC          | C | T | - | - |
| Prkar1b | ENSRNOT00000031896 | 16,035,690 | INTRONIC          | G | A | - | - |
| Prkar1b | ENSRNOT00000031896 | 16,036,704 | INTRONIC          | C | A | - | - |
| Prkar1b | ENSRNOT00000031896 | 16,037,138 | INTRONIC          | G | A | - | - |
| Prkar1b | ENSRNOT00000031896 | 16,037,350 | INTRONIC          | C | T | - | - |
| Prkar1b | ENSRNOT00000031896 | 16,037,483 | INTRONIC          | T | C | - | - |
| Prkar1b | ENSRNOT00000031896 | 16,037,844 | INTRONIC          | C | T | - | - |
| Prkar1b | ENSRNOT00000031896 | 16,038,324 | INTRONIC          | C | T | - | - |
| Prkar1b | ENSRNOT00000031896 | 16,038,582 | INTRONIC          | G | A | - | - |
| Prkar1b | ENSRNOT00000031896 | 16,039,251 | INTRONIC          | C | T | - | - |
| Prkar1b | ENSRNOT00000031896 | 16,040,352 | INTRONIC          | C | T | - | - |
| Prkar1b | ENSRNOT00000031896 | 16,040,605 | INTRONIC          | G | A | - | - |
| Prkar1b | ENSRNOT00000031896 | 16,043,469 | INTRONIC          | T | G | - | - |
| Prkar1b | ENSRNOT00000031896 | 16,043,576 | INTRONIC          | C | T | - | - |
| Prkar1b | ENSRNOT00000031896 | 16,043,649 | INTRONIC          | T | C | - | - |
| Prkar1b | ENSRNOT00000031896 | 16,043,669 | INTRONIC          | A | C | - | - |
| Prkar1b | ENSRNOT00000031896 | 16,043,922 | INTRONIC          | T | C | - | - |
| Prkar1b | ENSRNOT00000031896 | 16,044,401 | INTRONIC          | C | T | - | - |
| Prkar1b | ENSRNOT00000031896 | 16,044,538 | INTRONIC          | T | C | - | - |
| Prkar1b | ENSRNOT00000031896 | 16,044,764 | INTRONIC          | T | C | - | - |
| Prkar1b | ENSRNOT00000031896 | 16,044,790 | INTRONIC          | C | T | - | - |
| Prkar1b | ENSRNOT00000031896 | 16,044,845 | INTRONIC          | C | T | - | - |
| Prkar1b | ENSRNOT00000031896 | 16,044,985 | INTRONIC          | A | G | - | - |
| Prkar1b | ENSRNOT00000031896 | 16,045,601 | INTRONIC          | G | T | - | - |
| Prkar1b | ENSRNOT00000031896 | 16,045,978 | INTRONIC          | G | A | - | - |
| Prkar1b | ENSRNOT00000031896 | 16,045,979 | INTRONIC          | T | C | - | - |
| Prkar1b | ENSRNOT00000031896 | 16,046,143 | INTRONIC          | G | A | - | - |
| Prkar1b | ENSRNOT00000031896 | 16,046,148 | INTRONIC          | G | A | - | - |
| Prkar1b | ENSRNOT00000031896 | 16,046,201 | INTRONIC          | A | G | - | - |
| Prkar1b | ENSRNOT00000031896 | 16,046,210 | INTRONIC          | C | T | - | - |
| Prkar1b | ENSRNOT00000031896 | 16,046,362 | INTRONIC          | A | C | - | - |
| Prkar1b | ENSRNOT00000031896 | 16,046,436 | INTRONIC          | A | G | - | - |
| Prkar1b | ENSRNOT00000031896 | 16,046,550 | INTRONIC          | G | A | - | - |
| Prkar1b | ENSRNOT00000031896 | 16,046,814 | INTRONIC          | G | T | - | - |
| Prkar1b | ENSRNOT00000031896 | 16,046,878 | INTRONIC          | A | G | - | - |
| Prkar1b | ENSRNOT00000031896 | 16,046,954 | INTRONIC          | C | T | - | - |
| Prkar1b | ENSRNOT00000031896 | 16,047,211 | INTRONIC          | G | A | - | - |
| Prkar1b | ENSRNOT00000031896 | 16,047,380 | INTRONIC          | A | C | - | - |
| Prkar1b | ENSRNOT00000031896 | 16,047,501 | INTRONIC          | A | G | - | - |
| Prkar1b | ENSRNOT00000031896 | 16,047,830 | INTRONIC          | G | A | - | - |
| Prkar1b | ENSRNOT00000031896 | 16,047,986 | INTRONIC          | G | A | - | - |
| Prkar1b | ENSRNOT00000031896 | 16,048,531 | INTRONIC          | T | C | - | - |
| Prkar1b | ENSRNOT00000031896 | 16,049,724 | INTRONIC          | A | G | - | - |
| Prkar1b | ENSRNOT00000031896 | 16,050,429 | INTRONIC          | T | G | - | - |
| Prkar1b | ENSRNOT00000031896 | 16,050,438 | INTRONIC          | G | A | - | - |
| Prkar1b | ENSRNOT00000031896 | 16,050,604 | INTRONIC          | C | T | - | - |
| Prkar1b | ENSRNOT00000031896 | 16,050,651 | INTRONIC          | T | C | - | - |
| Prkar1b | ENSRNOT00000031896 | 16,050,907 | INTRONIC          | T | C | - | - |
| Prkar1b | ENSRNOT00000031896 | 16,051,152 | INTRONIC          | G | A | - | - |
| Prkar1b | ENSRNOT00000031896 | 16,051,550 | INTRONIC          | G | A | - | - |
| Prkar1b | ENSRNOT00000031896 | 16,051,686 | INTRONIC          | T | C | - | - |
| Prkar1b | ENSRNOT00000031896 | 16,051,792 | INTRONIC          | T | C | - | - |
| Prkar1b | ENSRNOT00000031896 | 16,052,159 | INTRONIC          | C | T | - | - |
| Prkar1b | ENSRNOT00000031896 | 16,052,335 | INTRONIC          | T | A | - | - |
| Prkar1b | ENSRNOT00000031896 | 16,053,124 | INTRONIC          | C | T | - | - |

|         |                    |            |          |   |   |   |   |
|---------|--------------------|------------|----------|---|---|---|---|
| Prkar1b | ENSRNOT00000031896 | 16,053,361 | INTRONIC | G | A | - | - |
| Prkar1b | ENSRNOT00000031896 | 16,053,669 | INTRONIC | G | A | - | - |
| Prkar1b | ENSRNOT00000031896 | 16,053,768 | INTRONIC | T | C | - | - |
| Prkar1b | ENSRNOT00000031896 | 16,053,837 | INTRONIC | T | C | - | - |
| Prkar1b | ENSRNOT00000031896 | 16,054,265 | INTRONIC | T | C | - | - |
| Prkar1b | ENSRNOT00000031896 | 16,054,274 | INTRONIC | A | G | - | - |
| Prkar1b | ENSRNOT00000031896 | 16,054,317 | INTRONIC | T | C | - | - |
| Prkar1b | ENSRNOT00000031896 | 16,054,318 | INTRONIC | C | A | - | - |
| Prkar1b | ENSRNOT00000031896 | 16,054,390 | INTRONIC | G | T | - | - |
| Prkar1b | ENSRNOT00000031896 | 16,054,442 | INTRONIC | G | T | - | - |
| Prkar1b | ENSRNOT00000031896 | 16,054,507 | INTRONIC | T | C | - | - |
| Prkar1b | ENSRNOT00000031896 | 16,054,534 | INTRONIC | G | A | - | - |
| Prkar1b | ENSRNOT00000031896 | 16,054,615 | INTRONIC | G | A | - | - |
| Prkar1b | ENSRNOT00000031896 | 16,055,509 | INTRONIC | C | T | - | - |
| Prkar1b | ENSRNOT00000031896 | 16,055,673 | INTRONIC | G | C | - | - |
| Prkar1b | ENSRNOT00000031896 | 16,055,850 | INTRONIC | C | T | - | - |
| Prkar1b | ENSRNOT00000031896 | 16,056,245 | INTRONIC | A | C | - | - |
| Prkar1b | ENSRNOT00000031896 | 16,056,368 | INTRONIC | A | G | - | - |
| Prkar1b | ENSRNOT00000031896 | 16,056,604 | INTRONIC | G | A | - | - |
| Prkar1b | ENSRNOT00000031896 | 16,057,074 | INTRONIC | T | C | - | - |
| Prkar1b | ENSRNOT00000031896 | 16,057,134 | INTRONIC | C | T | - | - |
| Prkar1b | ENSRNOT00000031896 | 16,057,277 | INTRONIC | G | A | - | - |
| Prkar1b | ENSRNOT00000031896 | 16,057,350 | INTRONIC | C | T | - | - |
| Prkar1b | ENSRNOT00000031896 | 16,057,719 | INTRONIC | A | G | - | - |
| Prkar1b | ENSRNOT00000031896 | 16,059,162 | INTRONIC | A | G | - | - |
| Prkar1b | ENSRNOT00000031896 | 16,059,416 | INTRONIC | T | A | - | - |
| Prkar1b | ENSRNOT00000031896 | 16,059,417 | INTRONIC | C | T | - | - |
| Prkar1b | ENSRNOT00000031896 | 16,059,708 | INTRONIC | T | A | - | - |
| Prkar1b | ENSRNOT00000031896 | 16,060,003 | INTRONIC | G | A | - | - |
| Prkar1b | ENSRNOT00000031896 | 16,060,124 | INTRONIC | T | C | - | - |
| Prkar1b | ENSRNOT00000031896 | 16,061,009 | INTRONIC | C | T | - | - |
| Prkar1b | ENSRNOT00000031896 | 16,062,274 | INTRONIC | A | C | - | - |
| Prkar1b | ENSRNOT00000031896 | 16,062,942 | INTRONIC | T | C | - | - |
| Prkar1b | ENSRNOT00000031896 | 16,062,999 | INTRONIC | G | A | - | - |
| Prkar1b | ENSRNOT00000031896 | 16,063,045 | INTRONIC | G | C | - | - |
| Prkar1b | ENSRNOT00000031896 | 16,063,051 | INTRONIC | G | A | - | - |
| Prkar1b | ENSRNOT00000031896 | 16,063,130 | INTRONIC | A | T | - | - |
| Prkar1b | ENSRNOT00000031896 | 16,063,139 | INTRONIC | T | C | - | - |
| Prkar1b | ENSRNOT00000031896 | 16,063,333 | INTRONIC | C | T | - | - |
| Prkar1b | ENSRNOT00000031896 | 16,063,334 | INTRONIC | A | G | - | - |
| Prkar1b | ENSRNOT00000031896 | 16,063,358 | INTRONIC | A | C | - | - |
| Prkar1b | ENSRNOT00000031896 | 16,063,740 | INTRONIC | A | G | - | - |
| Prkar1b | ENSRNOT00000031896 | 16,063,975 | INTRONIC | T | C | - | - |
| Prkar1b | ENSRNOT00000031896 | 16,064,392 | INTRONIC | C | T | - | - |
| Prkar1b | ENSRNOT00000031896 | 16,064,784 | INTRONIC | G | A | - | - |
| Prkar1b | ENSRNOT00000031896 | 16,065,626 | INTRONIC | G | T | - | - |
| Prkar1b | ENSRNOT00000031896 | 16,065,642 | INTRONIC | G | C | - | - |
| Prkar1b | ENSRNOT00000031896 | 16,065,654 | INTRONIC | C | A | - | - |
| Prkar1b | ENSRNOT00000031896 | 16,065,860 | INTRONIC | A | G | - | - |
| Prkar1b | ENSRNOT00000031896 | 16,066,698 | INTRONIC | G | A | - | - |
| Prkar1b | ENSRNOT00000031896 | 16,066,788 | INTRONIC | A | G | - | - |
| Prkar1b | ENSRNOT00000031896 | 16,066,852 | INTRONIC | T | G | - | - |
| Prkar1b | ENSRNOT00000031896 | 16,067,369 | INTRONIC | C | T | - | - |
| Prkar1b | ENSRNOT00000031896 | 16,067,527 | INTRONIC | C | T | - | - |
| Prkar1b | ENSRNOT00000031896 | 16,067,534 | INTRONIC | G | A | - | - |
| Prkar1b | ENSRNOT00000031896 | 16,067,831 | INTRONIC | T | C | - | - |
| Prkar1b | ENSRNOT00000031896 | 16,067,974 | INTRONIC | A | G | - | - |
| Prkar1b | ENSRNOT00000031896 | 16,068,134 | INTRONIC | T | C | - | - |
| Prkar1b | ENSRNOT00000031896 | 16,068,238 | INTRONIC | C | G | - | - |
| Prkar1b | ENSRNOT00000031896 | 16,068,340 | INTRONIC | C | T | - | - |
| Prkar1b | ENSRNOT00000031896 | 16,068,519 | INTRONIC | T | C | - | - |
| Prkar1b | ENSRNOT00000031896 | 16,068,573 | INTRONIC | C | T | - | - |
| Prkar1b | ENSRNOT00000031896 | 16,068,819 | INTRONIC | C | A | - | - |
| Prkar1b | ENSRNOT00000031896 | 16,069,588 | INTRONIC | T | C | - | - |
| Prkar1b | ENSRNOT00000031896 | 16,070,127 | INTRONIC | T | C | - | - |
| Prkar1b | ENSRNOT00000031896 | 16,070,327 | INTRONIC | C | T | - | - |
| Prkar1b | ENSRNOT00000031896 | 16,070,679 | INTRONIC | G | A | - | - |
| Prkar1b | ENSRNOT00000031896 | 16,070,702 | INTRONIC | T | C | - | - |
| Prkar1b | ENSRNOT00000031896 | 16,070,714 | INTRONIC | A | G | - | - |
| Prkar1b | ENSRNOT00000031896 | 16,071,100 | INTRONIC | G | A | - | - |
| Prkar1b | ENSRNOT00000031896 | 16,071,118 | INTRONIC | T | C | - | - |
| Prkar1b | ENSRNOT00000031896 | 16,071,379 | INTRONIC | G | T | - | - |
| Prkar1b | ENSRNOT00000031896 | 16,072,008 | INTRONIC | T | C | - | - |
| Prkar1b | ENSRNOT00000031896 | 16,072,157 | INTRONIC | T | C | - | - |
| Prkar1b | ENSRNOT00000031896 | 16,072,216 | INTRONIC | A | G | - | - |
| Prkar1b | ENSRNOT00000031896 | 16,072,251 | INTRONIC | C | T | - | - |
| Prkar1b | ENSRNOT00000031896 | 16,072,298 | INTRONIC | G | T | - | - |
| Prkar1b | ENSRNOT00000031896 | 16,072,304 | INTRONIC | C | T | - | - |
| Prkar1b | ENSRNOT00000031896 | 16,072,544 | INTRONIC | T | C | - | - |
| Prkar1b | ENSRNOT00000031896 | 16,072,831 | INTRONIC | A | G | - | - |



|         |                    |            |                   |   |   |   |   |
|---------|--------------------|------------|-------------------|---|---|---|---|
| Prkar1b | ENSRNOT00000031896 | 16,072,919 | INTRONIC          | A | G | - | - |
| Prkar1b | ENSRNOT00000031896 | 16,073,070 | INTRONIC          | A | G | - | - |
| Prkar1b | ENSRNOT00000031896 | 16,073,306 | INTRONIC          | C | T | - | - |
| Prkar1b | ENSRNOT00000031896 | 16,073,645 | INTRONIC          | G | A | - | - |
| Prkar1b | ENSRNOT00000031896 | 16,074,355 | INTRONIC          | A | G | - | - |
| Prkar1b | ENSRNOT00000031896 | 16,075,225 | INTRONIC          | G | A | - | - |
| Prkar1b | ENSRNOT00000031896 | 16,075,387 | INTRONIC          | T | C | - | - |
| Prkar1b | ENSRNOT00000031896 | 16,075,474 | INTRONIC          | T | C | - | - |
| Prkar1b | ENSRNOT00000031896 | 16,075,562 | INTRONIC          | A | G | - | - |
| Prkar1b | ENSRNOT00000031896 | 16,075,568 | INTRONIC          | G | A | - | - |
| Prkar1b | ENSRNOT00000031896 | 16,075,838 | INTRONIC          | G | A | - | - |
| Prkar1b | ENSRNOT00000031896 | 16,075,904 | INTRONIC          | G | A | - | - |
| Prkar1b | ENSRNOT00000031896 | 16,076,013 | INTRONIC          | T | C | - | - |
| Prkar1b | ENSRNOT00000031896 | 16,076,121 | INTRONIC          | C | G | - | - |
| Prkar1b | ENSRNOT00000031896 | 16,076,590 | INTRONIC          | T | C | - | - |
| Prkar1b | ENSRNOT00000031896 | 16,077,655 | INTRONIC          | A | G | - | - |
| Prkar1b | ENSRNOT00000031896 | 16,077,746 | INTRONIC          | C | T | - | - |
| Prkar1b | ENSRNOT00000031896 | 16,077,917 | INTRONIC          | A | G | - | - |
| Prkar1b | ENSRNOT00000031896 | 16,078,131 | INTRONIC          | T | G | - | - |
| Prkar1b | ENSRNOT00000031896 | 16,078,139 | INTRONIC          | T | G | - | - |
| Prkar1b | ENSRNOT00000031896 | 16,078,232 | INTRONIC          | A | G | - | - |
| Prkar1b | ENSRNOT00000031896 | 16,078,410 | INTRONIC          | C | T | - | - |
| Prkar1b | ENSRNOT00000031896 | 16,078,439 | INTRONIC          | T | C | - | - |
| Prkar1b | ENSRNOT00000031896 | 16,078,956 | INTRONIC          | T | C | - | - |
| Prkar1b | ENSRNOT00000031896 | 16,079,021 | INTRONIC          | T | C | - | - |
| Prkar1b | ENSRNOT00000031896 | 16,079,415 | INTRONIC          | A | T | - | - |
| Prkar1b | ENSRNOT00000031896 | 16,079,447 | INTRONIC          | G | A | - | - |
| Prkar1b | ENSRNOT00000031896 | 16,079,749 | INTRONIC          | C | T | - | - |
| Prkar1b | ENSRNOT00000031896 | 16,080,236 | INTRONIC          | T | G | - | - |
| Prkar1b | ENSRNOT00000031896 | 16,080,462 | INTRONIC          | G | A | - | - |
| Prkar1b | ENSRNOT00000031896 | 16,081,034 | INTRONIC          | T | C | - | - |
| Prkar1b | ENSRNOT00000031896 | 16,081,562 | INTRONIC          | T | C | - | - |
| Prkar1b | ENSRNOT00000031896 | 16,081,994 | INTRONIC          | A | G | - | - |
| Prkar1b | ENSRNOT00000031896 | 16,082,616 | INTRONIC          | A | G | - | - |
| Prkar1b | ENSRNOT00000031896 | 16,082,715 | INTRONIC          | T | G | - | - |
| Prkar1b | ENSRNOT00000031896 | 16,082,999 | INTRONIC          | C | T | - | - |
| Prkar1b | ENSRNOT00000031896 | 16,083,888 | INTRONIC          | C | T | - | - |
| Prkar1b | ENSRNOT00000031896 | 16,083,976 | INTRONIC          | T | G | - | - |
| Prkar1b | ENSRNOT00000031896 | 16,084,101 | INTRONIC          | T | G | - | - |
| Prkar1b | ENSRNOT00000031896 | 16,084,106 | INTRONIC          | C | T | - | - |
| Prkar1b | ENSRNOT00000031896 | 16,084,217 | INTRONIC          | T | A | - | - |
| Prkar1b | ENSRNOT00000031896 | 16,084,479 | INTRONIC          | C | T | - | - |
| Prkar1b | ENSRNOT00000031896 | 16,084,485 | INTRONIC          | C | T | - | - |
| Prkar1b | ENSRNOT00000031896 | 16,084,518 | INTRONIC          | A | G | - | - |
| Prkar1b | ENSRNOT00000031896 | 16,084,538 | INTRONIC          | A | G | - | - |
| Prkar1b | ENSRNOT00000031896 | 16,084,826 | INTRONIC          | C | T | - | - |
| Prkar1b | ENSRNOT00000031896 | 16,085,672 | INTRONIC          | A | C | - | - |
| Prkar1b | ENSRNOT00000031896 | 16,086,528 | INTRONIC          | C | T | - | - |
| Prkar1b | ENSRNOT00000031896 | 16,086,625 | INTRONIC          | C | G | - | - |
| Prkar1b | ENSRNOT00000031896 | 16,086,819 | INTRONIC          | C | A | - | - |
| Prkar1b | ENSRNOT00000031896 | 16,087,955 | INTRONIC          | G | A | - | - |
| Prkar1b | ENSRNOT00000031896 | 16,087,963 | INTRONIC          | A | G | - | - |
| Prkar1b | ENSRNOT00000031896 | 16,088,191 | INTRONIC          | G | T | - | - |
| Prkar1b | ENSRNOT00000031896 | 16,088,249 | INTRONIC          | C | A | - | - |
| Prkar1b | ENSRNOT00000031896 | 16,088,837 | INTRONIC          | A | G | - | - |
| Prkar1b | ENSRNOT00000031896 | 16,089,711 | INTRONIC          | T | G | - | - |
| Prkar1b | ENSRNOT00000031896 | 16,090,195 | SYNONYMOUS_CODING | T | C | - | - |
| Prkar1b | ENSRNOT00000031896 | 16,090,288 | INTRONIC          | A | G | - | - |
| Prkar1b | ENSRNOT00000031896 | 16,090,337 | INTRONIC          | T | C | - | - |
| Prkar1b | ENSRNOT00000031896 | 16,090,387 | INTRONIC          | T | C | - | - |
| Prkar1b | ENSRNOT00000031896 | 16,090,778 | INTRONIC          | G | A | - | - |
| Prkar1b | ENSRNOT00000031896 | 16,091,011 | INTRONIC          | C | T | - | - |
| Prkar1b | ENSRNOT00000031896 | 16,093,465 | INTRONIC          | A | C | - | - |
| Prkar1b | ENSRNOT00000031896 | 16,093,777 | INTRONIC          | A | G | - | - |
| Prkar1b | ENSRNOT00000031896 | 16,094,272 | INTRONIC          | G | C | - | - |
| Prkar1b | ENSRNOT00000031896 | 16,094,530 | INTRONIC          | T | C | - | - |
| Prkar1b | ENSRNOT00000031896 | 16,094,580 | INTRONIC          | A | G | - | - |
| Prkar1b | ENSRNOT00000031896 | 16,094,679 | INTRONIC          | G | T | - | - |
| Prkar1b | ENSRNOT00000031896 | 16,094,723 | INTRONIC          | T | C | - | - |
| Prkar1b | ENSRNOT00000031896 | 16,094,754 | INTRONIC          | G | A | - | - |
| Prkar1b | ENSRNOT00000031896 | 16,095,394 | INTRONIC          | A | G | - | - |
| Prkar1b | ENSRNOT00000031896 | 16,096,059 | INTRONIC          | G | T | - | - |
| Prkar1b | ENSRNOT00000031896 | 16,096,493 | INTRONIC          | C | A | - | - |
| Prkar1b | ENSRNOT00000031896 | 16,096,854 | INTRONIC          | A | G | - | - |
| Prkar1b | ENSRNOT00000031896 | 16,096,902 | INTRONIC          | T | C | - | - |
| Prkar1b | ENSRNOT00000031896 | 16,098,187 | INTRONIC          | G | A | - | - |
| Prkar1b | ENSRNOT00000031896 | 16,098,363 | INTRONIC          | G | C | - | - |
| Prkar1b | ENSRNOT00000031896 | 16,099,823 | INTRONIC          | C | T | - | - |
| Prkar1b | ENSRNOT00000031896 | 16,100,053 | INTRONIC          | G | A | - | - |
| Prkar1b | ENSRNOT00000031896 | 16,100,421 | INTRONIC          | C | T | - | - |

|         |                    |            |                               |   |   |   |   |
|---------|--------------------|------------|-------------------------------|---|---|---|---|
| Prkar1b | ENSRNOT00000031896 | 16,101,098 | INTRONIC                      | G | A | - | - |
| Prkar1b | ENSRNOT00000031896 | 16,101,099 | INTRONIC                      | C | T | - | - |
| Prkar1b | ENSRNOT00000031896 | 16,101,408 | INTRONIC                      | G | A | - | - |
| Prkar1b | ENSRNOT00000031896 | 16,102,383 | INTRONIC                      | T | C | - | - |
| Prkar1b | ENSRNOT00000031896 | 16,102,773 | INTRONIC                      | C | A | - | - |
| Prkar1b | ENSRNOT00000031896 | 16,102,846 | INTRONIC                      | T | G | - | - |
| Prkar1b | ENSRNOT00000031896 | 16,103,113 | INTRONIC                      | C | G | - | - |
| Prkar1b | ENSRNOT00000031896 | 16,103,134 | INTRONIC                      | G | A | - | - |
| Prkar1b | ENSRNOT00000031896 | 16,103,170 | INTRONIC                      | A | G | - | - |
| Prkar1b | ENSRNOT00000031896 | 16,103,563 | INTRONIC                      | A | G | - | - |
| Prkar1b | ENSRNOT00000031896 | 16,103,617 | INTRONIC                      | C | A | - | - |
| Prkar1b | ENSRNOT00000031896 | 16,103,622 | INTRONIC                      | G | C | - | - |
| Prkar1b | ENSRNOT00000031896 | 16,103,695 | INTRONIC                      | A | G | - | - |
| Prkar1b | ENSRNOT00000031896 | 16,103,707 | INTRONIC                      | G | A | - | - |
| Prkar1b | ENSRNOT00000031896 | 16,103,811 | INTRONIC                      | G | A | - | - |
| Prkar1b | ENSRNOT00000031896 | 16,103,851 | INTRONIC                      | G | A | - | - |
| Prkar1b | ENSRNOT00000031896 | 16,103,877 | INTRONIC                      | G | A | - | - |
| Prkar1b | ENSRNOT00000031896 | 16,103,912 | INTRONIC                      | A | C | - | - |
| Prkar1b | ENSRNOT00000031896 | 16,104,280 | INTRONIC                      | A | C | - | - |
| Prkar1b | ENSRNOT00000031896 | 16,113,156 | INTRONIC                      | T | C | - | - |
| Prkar1b | ENSRNOT00000031896 | 16,113,609 | INTRONIC                      | C | T | - | - |
| Prkar1b | ENSRNOT00000031896 | 16,113,768 | INTRONIC                      | C | T | - | - |
| Prkar1b | ENSRNOT00000031896 | 16,114,880 | INTRONIC                      | C | T | - | - |
| Prkar1b | ENSRNOT00000031896 | 16,115,809 | INTRONIC                      | G | T | - | - |
| Prkar1b | ENSRNOT00000031896 | 16,115,839 | INTRONIC                      | A | T | - | - |
| Prkar1b | ENSRNOT00000031896 | 16,116,039 | INTRONIC                      | G | A | - | - |
| Prkar1b | ENSRNOT00000031896 | 16,116,270 | INTRONIC                      | C | T | - | - |
| Prkar1b | ENSRNOT00000031896 | 16,116,671 | INTRONIC                      | C | G | - | - |
| Prkar1b | ENSRNOT00000031896 | 16,116,832 | INTRONIC                      | T | G | - | - |
| Prkar1b | ENSRNOT00000031896 | 16,117,258 | INTRONIC                      | C | T | - | - |
| Prkar1b | ENSRNOT00000031896 | 16,117,990 | INTRONIC                      | G | A | - | - |
| Prkar1b | ENSRNOT00000031896 | 16,118,102 | INTRONIC                      | T | C | - | - |
| Prkar1b | ENSRNOT00000031896 | 16,118,309 | INTRONIC                      | A | G | - | - |
| Prkar1b | ENSRNOT00000031896 | 16,119,577 | INTRONIC                      | G | A | - | - |
| Prkar1b | ENSRNOT00000031896 | 16,120,085 | INTRONIC                      | G | A | - | - |
| Prkar1b | ENSRNOT00000031896 | 16,120,281 | INTRONIC                      | T | C | - | - |
| Prkar1b | ENSRNOT00000031896 | 16,120,312 | INTRONIC                      | T | C | - | - |
| Prkar1b | ENSRNOT00000031896 | 16,121,800 | INTRONIC                      | T | G | - | - |
| Prkar1b | ENSRNOT00000031896 | 16,121,806 | INTRONIC                      | T | G | A | - |
| Prkar1b | ENSRNOT00000031896 | 16,121,828 | INTRONIC                      | G | A | - | - |
| Prkar1b | ENSRNOT00000031896 | 16,122,260 | INTRONIC                      | C | T | - | - |
| Prkar1b | ENSRNOT00000031896 | 16,122,602 | INTRONIC                      | G | T | - | - |
| Prkar1b | ENSRNOT00000031896 | 16,122,807 | INTRONIC                      | G | A | - | - |
| Prkar1b | ENSRNOT00000031896 | 16,123,754 | INTRONIC                      | G | C | - | - |
| Prkar1b | ENSRNOT00000031896 | 16,124,080 | INTRONIC                      | A | G | - | - |
| Prkar1b | ENSRNOT00000031896 | 16,124,144 | INTRONIC                      | A | G | - | - |
| Prkar1b | ENSRNOT00000031896 | 16,124,148 | INTRONIC                      | T | C | - | - |
| Prkar1b | ENSRNOT00000031896 | 16,124,466 | INTRONIC                      | G | A | - | - |
| Prkar1b | ENSRNOT00000031896 | 16,125,023 | INTRONIC                      | T | C | - | - |
| Prkar1b | ENSRNOT00000031896 | 16,125,083 | INTRONIC                      | A | G | - | - |
| Prkar1b | ENSRNOT00000031896 | 16,125,270 | INTRONIC                      | C | T | - | - |
| Prkar1b | ENSRNOT00000031896 | 16,125,272 | INTRONIC                      | A | G | - | - |
| Prkar1b | ENSRNOT00000031896 | 16,125,370 | INTRONIC                      | A | G | - | - |
| Prkar1b | ENSRNOT00000031896 | 16,126,022 | INTRONIC                      | A | G | - | - |
| Prkar1b | ENSRNOT00000031896 | 16,126,069 | INTRONIC                      | T | C | - | - |
| Prkar1b | ENSRNOT00000031896 | 16,126,271 | INTRONIC                      | G | A | - | - |
| Prkar1b | ENSRNOT00000031896 | 16,126,314 | INTRONIC                      | G | A | - | - |
| Prkar1b | ENSRNOT00000031896 | 16,126,387 | INTRONIC                      | G | A | - | - |
| Prkar1b | ENSRNOT00000031896 | 16,126,735 | INTRONIC                      | G | C | - | - |
| Prkar1b | ENSRNOT00000031896 | 16,126,770 | INTRONIC                      | C | A | - | - |
| Prkar1b | ENSRNOT00000031896 | 16,126,802 | INTRONIC                      | C | T | - | - |
| Prkar1b | ENSRNOT00000031896 | 16,126,820 | INTRONIC                      | G | A | - | - |
| Prkar1b | ENSRNOT00000031896 | 16,127,026 | INTRONIC                      | T | C | - | - |
| Prkar1b | ENSRNOT00000031896 | 16,127,138 | INTRONIC                      | C | T | - | - |
| Prkar1b | ENSRNOT00000031896 | 16,127,367 | INTRONIC                      | T | C | - | - |
| Prkar1b | ENSRNOT00000031896 | 16,127,432 | INTRONIC                      | C | G | - | - |
| Prkar1b | ENSRNOT00000031896 | 16,127,603 | INTRONIC                      | A | G | - | - |
| Prkar1b | ENSRNOT00000031896 | 16,127,880 | INTRONIC                      | T | C | - | - |
| Prkar1b | ENSRNOT00000031896 | 16,127,996 | INTRONIC                      | C | T | - | - |
| Prkar1b | ENSRNOT00000031896 | 16,128,095 | INTRONIC                      | G | A | - | - |
| Prkar1b | ENSRNOT00000031896 | 16,128,328 | INTRONIC                      | C | T | - | - |
| Prkar1b | ENSRNOT00000031896 | 16,128,346 | INTRONIC                      | C | T | - | - |
| Prkar1b | ENSRNOT00000031896 | 16,128,347 | INTRONIC                      | A | G | - | - |
| Prkar1b | ENSRNOT00000031896 | 16,128,410 | SYNONYMOUS_CODING,SPLICE_SITE | T | C | - | - |
| Prkar1b | ENSRNOT00000031896 | 16,128,458 | SYNONYMOUS_CODING             | G | A | - | - |
| Prkar1b | ENSRNOT00000031896 | 16,128,546 | INTRONIC                      | A | G | - | - |
| Prkar1b | ENSRNOT00000031896 | 16,128,793 | INTRONIC                      | G | A | - | - |
| Prkar1b | ENSRNOT00000031896 | 16,128,975 | INTRONIC                      | T | A | - | - |
| Prkar1b | ENSRNOT00000031896 | 16,129,000 | INTRONIC                      | C | T | - | - |
| Prkar1b | ENSRNOT00000031896 | 16,129,440 | INTRONIC                      | T | C | - | - |

|         |                    |            |            |   |   |   |   |
|---------|--------------------|------------|------------|---|---|---|---|
| Prkar1b | ENSRNOT00000031896 | 16,129,604 | INTRONIC   | C | T | - | - |
| Prkar1b | ENSRNOT00000031896 | 16,129,651 | INTRONIC   | T | C | - | - |
| Prkar1b | ENSRNOT00000031896 | 16,129,659 | INTRONIC   | C | T | - | - |
| Prkar1b | ENSRNOT00000031896 | 16,130,408 | 3PRIME_UTR | A | G | - | - |
| Prkar1b | ENSRNOT00000031896 | 16,130,585 | 3PRIME_UTR | A | C | - | - |
| Prkar1b | ENSRNOT00000031896 | 16,130,589 | 3PRIME_UTR | A | G | - | - |
| Prkar1b | ENSRNOT00000031896 | 16,130,635 | 3PRIME_UTR | A | T | - | - |
| Prkar1b | ENSRNOT00000031896 | 16,131,195 | DOWNSTREAM | C | T | - | - |
| Prkar1b | ENSRNOT00000031896 | 16,131,238 | DOWNSTREAM | A | G | - | - |
| Prkar1b | ENSRNOT00000031896 | 16,131,513 | DOWNSTREAM | G | A | - | - |
| Prkar1b | ENSRNOT00000031896 | 16,131,514 | DOWNSTREAM | T | C | - | - |
| Prkar1b | ENSRNOT00000031896 | 16,131,545 | DOWNSTREAM | A | G | - | - |
| Prkar1b | ENSRNOT00000031896 | 16,131,549 | DOWNSTREAM | A | G | - | - |
| Prkar1b | ENSRNOT00000031896 | 16,131,586 | DOWNSTREAM | A | G | - | - |
| Prkar1b | ENSRNOT00000031896 | 16,131,632 | DOWNSTREAM | C | T | - | - |
| Prkar1b | ENSRNOT00000031896 | 16,131,764 | DOWNSTREAM | C | G | - | - |
| Prkar1b | ENSRNOT00000031896 | 16,131,776 | DOWNSTREAM | T | C | - | - |
| Prkar1b | ENSRNOT00000031896 | 16,131,904 | DOWNSTREAM | T | A | - | - |
| Prkar1b | ENSRNOT00000031896 | 16,131,935 | DOWNSTREAM | A | G | - | - |
| Prkar1b | ENSRNOT00000031896 | 16,131,946 | DOWNSTREAM | A | G | - | - |
| Prkar1b | ENSRNOT00000031896 | 16,131,983 | DOWNSTREAM | A | G | - | - |
| Prkar1b | ENSRNOT00000031896 | 16,132,042 | DOWNSTREAM | A | C | - | - |
| Prkar1b | ENSRNOT00000031896 | 16,132,063 | DOWNSTREAM | G | A | - | - |
| Prkar1b | ENSRNOT00000031896 | 16,132,102 | DOWNSTREAM | G | A | - | - |
| Prkar1b | ENSRNOT00000031896 | 16,132,129 | DOWNSTREAM | C | T | - | - |
| Prkar1b | ENSRNOT00000031896 | 16,132,163 | DOWNSTREAM | T | C | - | - |
| Prkar1b | ENSRNOT00000031896 | 16,132,164 | DOWNSTREAM | G | A | - | - |
| Prkar1b | ENSRNOT00000031896 | 16,132,181 | DOWNSTREAM | C | T | - | - |
| Prkar1b | ENSRNOT00000031896 | 16,132,210 | DOWNSTREAM | T | A | - | - |
| Prkar1b | ENSRNOT00000031896 | 16,132,291 | DOWNSTREAM | G | A | - | - |
| Prkar1b | ENSRNOT00000031896 | 16,132,362 | DOWNSTREAM | A | T | - | - |
| Prkar1b | ENSRNOT00000031896 | 16,132,380 | DOWNSTREAM | C | G | - | - |
| Prkar1b | ENSRNOT00000031896 | 16,132,418 | DOWNSTREAM | C | T | - | - |
| Prkar1b | ENSRNOT00000031896 | 16,132,455 | DOWNSTREAM | T | C | - | - |
| Prkar1b | ENSRNOT00000031896 | 16,132,490 | DOWNSTREAM | T | C | - | - |
| Prkar1b | ENSRNOT00000031896 | 16,132,878 | DOWNSTREAM | T | C | - | - |
| Prkar1b | ENSRNOT00000031896 | 16,132,951 | DOWNSTREAM | A | G | - | - |
| Prkar1b | ENSRNOT00000031896 | 16,133,083 | DOWNSTREAM | A | G | - | - |
| Prkar1b | ENSRNOT00000031896 | 16,133,090 | DOWNSTREAM | T | C | - | - |
| Prkar1b | ENSRNOT00000031896 | 16,133,107 | DOWNSTREAM | G | A | - | - |
| Prkar1b | ENSRNOT00000031896 | 16,133,152 | DOWNSTREAM | C | T | - | - |
| Prkar1b | ENSRNOT00000031896 | 16,133,282 | DOWNSTREAM | T | C | - | - |
| Prkar1b | ENSRNOT00000031896 | 16,133,288 | DOWNSTREAM | G | A | - | - |
| Prkar1b | ENSRNOT00000031896 | 16,133,356 | DOWNSTREAM | T | C | - | - |
| Prkar1b | ENSRNOT00000031896 | 16,133,361 | DOWNSTREAM | G | A | - | - |
| Prkar1b | ENSRNOT00000031896 | 16,133,378 | DOWNSTREAM | T | C | - | - |
| Prkar1b | ENSRNOT00000031896 | 16,133,423 | DOWNSTREAM | G | T | - | - |
| Prkar1b | ENSRNOT00000031896 | 16,133,473 | DOWNSTREAM | T | C | - | - |
| Prkar1b | ENSRNOT00000031896 | 16,134,102 | DOWNSTREAM | G | A | - | - |
| Prkar1b | ENSRNOT00000031896 | 16,134,193 | DOWNSTREAM | C | T | - | - |
| Prkar1b | ENSRNOT00000031896 | 16,134,270 | DOWNSTREAM | A | G | - | - |
| Prkar1b | ENSRNOT00000031896 | 16,134,292 | DOWNSTREAM | C | A | - | - |
| Prkar1b | ENSRNOT00000031896 | 16,134,455 | DOWNSTREAM | T | A | - | - |
| Prkar1b | ENSRNOT00000031896 | 16,134,694 | DOWNSTREAM | A | G | - | - |
| -       | -                  | 16,140,624 | INTERGENIC | G | T | - | - |
| -       | -                  | 16,140,628 | INTERGENIC | A | C | - | - |
| -       | -                  | 16,140,848 | INTERGENIC | C | T | - | - |
| -       | -                  | 16,141,063 | INTERGENIC | G | A | - | - |
| -       | -                  | 16,141,211 | INTERGENIC | A | G | - | - |
| -       | -                  | 16,141,329 | INTERGENIC | C | T | - | - |
| -       | -                  | 16,141,641 | INTERGENIC | T | C | - | - |
| -       | -                  | 16,141,681 | INTERGENIC | A | C | - | - |
| -       | -                  | 16,142,495 | INTERGENIC | C | T | - | - |
| -       | -                  | 16,142,726 | INTERGENIC | A | T | - | - |
| -       | -                  | 16,142,902 | INTERGENIC | A | G | - | - |
| -       | -                  | 16,143,392 | INTERGENIC | A | G | - | - |
| -       | -                  | 16,144,038 | INTERGENIC | T | C | - | - |
| -       | -                  | 16,144,291 | INTERGENIC | G | A | - | - |
| -       | -                  | 16,144,298 | INTERGENIC | G | T | - | - |
| -       | -                  | 16,144,347 | INTERGENIC | G | A | - | - |
| -       | -                  | 16,144,966 | INTERGENIC | G | A | - | - |
| -       | -                  | 16,145,646 | INTERGENIC | A | G | - | - |
| -       | -                  | 16,145,721 | INTERGENIC | C | T | - | - |
| -       | -                  | 16,145,844 | INTERGENIC | G | T | - | - |
| -       | -                  | 16,145,978 | INTERGENIC | T | C | - | - |
| -       | -                  | 16,146,197 | INTERGENIC | C | T | - | - |
| -       | -                  | 16,146,286 | INTERGENIC | T | C | - | - |
| -       | -                  | 16,147,119 | INTERGENIC | C | T | - | - |
| -       | -                  | 16,147,267 | INTERGENIC | A | C | - | - |
| -       | -                  | 16,148,567 | INTERGENIC | C | G | - | - |

|       |                    |            |            |   |   |   |   |
|-------|--------------------|------------|------------|---|---|---|---|
|       | -                  | 16,148,675 | INTERGENIC | C | T | - | - |
| Pdgfa | ENSRNOT00000001775 | 16,150,785 | UPSTREAM   | T | C | - | - |
| Pdgfa | ENSRNOT00000001775 | 16,151,420 | UPSTREAM   | G | A | - | - |
| Pdgfa | ENSRNOT00000001775 | 16,151,454 | UPSTREAM   | C | G | - | - |
| Pdgfa | ENSRNOT00000001775 | 16,151,472 | UPSTREAM   | G | C | - | - |
| Pdgfa | ENSRNOT00000001775 | 16,152,133 | UPSTREAM   | G | A | - | - |
| Pdgfa | ENSRNOT00000001775 | 16,152,384 | UPSTREAM   | T | C | - | - |
| Pdgfa | ENSRNOT00000001775 | 16,154,624 | UPSTREAM   | C | T | - | - |
| Pdgfa | ENSRNOT00000001775 | 16,156,439 | INTRONIC   | G | T | - | - |
| Pdgfa | ENSRNOT00000001775 | 16,156,442 | INTRONIC   | A | C | - | - |
| Pdgfa | ENSRNOT00000001775 | 16,156,657 | INTRONIC   | C | A | - | - |
| Pdgfa | ENSRNOT00000001775 | 16,158,211 | INTRONIC   | A | C | - | - |
| Pdgfa | ENSRNOT00000001775 | 16,158,466 | INTRONIC   | T | C | - | - |
| Pdgfa | ENSRNOT00000001775 | 16,161,246 | INTRONIC   | A | G | - | - |
| Pdgfa | ENSRNOT00000001775 | 16,161,531 | INTRONIC   | C | T | - | - |
| Pdgfa | ENSRNOT00000001775 | 16,162,334 | INTRONIC   | A | C | - | - |
| Pdgfa | ENSRNOT00000001775 | 16,162,348 | INTRONIC   | A | G | - | - |
| Pdgfa | ENSRNOT00000001775 | 16,162,401 | INTRONIC   | G | A | - | - |
| Pdgfa | ENSRNOT00000001775 | 16,162,737 | INTRONIC   | G | A | - | - |
| Pdgfa | ENSRNOT00000001775 | 16,163,897 | INTRONIC   | G | A | - | - |
| Pdgfa | ENSRNOT00000001775 | 16,164,328 | INTRONIC   | C | T | - | - |
| Pdgfa | ENSRNOT00000001775 | 16,164,442 | INTRONIC   | C | A | - | - |
| Pdgfa | ENSRNOT00000001775 | 16,164,603 | INTRONIC   | C | T | - | - |
| Pdgfa | ENSRNOT00000001775 | 16,165,720 | INTRONIC   | G | A | - | - |
| Pdgfa | ENSRNOT00000001775 | 16,166,024 | INTRONIC   | G | C | - | - |
| Pdgfa | ENSRNOT00000001775 | 16,166,425 | INTRONIC   | A | G | - | - |
| Pdgfa | ENSRNOT00000001775 | 16,168,009 | INTRONIC   | C | A | - | - |
| Pdgfa | ENSRNOT00000001775 | 16,168,417 | INTRONIC   | A | G | - | - |
| Pdgfa | ENSRNOT00000001775 | 16,168,778 | INTRONIC   | C | T | - | - |
| Pdgfa | ENSRNOT00000001775 | 16,168,890 | INTRONIC   | C | T | - | - |
| Pdgfa | ENSRNOT00000001775 | 16,168,999 | INTRONIC   | C | T | - | - |
| Pdgfa | ENSRNOT00000001775 | 16,169,242 | INTRONIC   | A | G | - | - |
| Pdgfa | ENSRNOT00000001775 | 16,169,503 | INTRONIC   | A | G | - | - |
| Pdgfa | ENSRNOT00000001775 | 16,169,614 | INTRONIC   | G | C | - | - |
| Pdgfa | ENSRNOT00000001775 | 16,169,992 | INTRONIC   | C | T | - | - |
| Pdgfa | ENSRNOT00000001775 | 16,170,391 | INTRONIC   | C | T | - | - |
| Pdgfa | ENSRNOT00000001775 | 16,170,440 | INTRONIC   | A | G | - | - |
| Pdgfa | ENSRNOT00000001775 | 16,170,522 | INTRONIC   | G | C | - | - |
| Pdgfa | ENSRNOT00000001775 | 16,170,566 | INTRONIC   | G | A | - | - |
| Pdgfa | ENSRNOT00000001775 | 16,171,140 | INTRONIC   | C | T | - | - |
| Pdgfa | ENSRNOT00000001775 | 16,171,360 | INTRONIC   | C | T | - | - |
| Pdgfa | ENSRNOT00000001775 | 16,172,884 | DOWNSTREAM | C | T | - | - |
| Pdgfa | ENSRNOT00000001775 | 16,173,114 | DOWNSTREAM | G | A | - | - |
| Pdgfa | ENSRNOT00000001775 | 16,173,404 | DOWNSTREAM | T | C | - | - |
| Pdgfa | ENSRNOT00000001775 | 16,173,714 | DOWNSTREAM | T | C | - | - |
| Pdgfa | ENSRNOT00000001775 | 16,175,141 | DOWNSTREAM | T | C | - | - |
| Pdgfa | ENSRNOT00000001775 | 16,175,541 | DOWNSTREAM | C | A | - | - |
|       | -                  | 16,179,910 | INTERGENIC | G | A | - | - |
|       | -                  | 16,179,974 | INTERGENIC | G | A | - | - |
|       | -                  | 16,180,712 | INTERGENIC | T | C | - | - |
|       | -                  | 16,182,676 | INTERGENIC | G | T | - | - |
|       | -                  | 16,183,246 | INTERGENIC | C | T | - | - |
|       | -                  | 16,183,892 | INTERGENIC | C | T | - | - |
|       | -                  | 16,183,900 | INTERGENIC | C | T | - | - |
|       | -                  | 16,183,906 | INTERGENIC | T | C | - | - |
|       | -                  | 16,183,941 | INTERGENIC | C | T | - | - |
|       | -                  | 16,183,942 | INTERGENIC | C | T | - | - |
|       | -                  | 16,183,970 | INTERGENIC | C | T | - | - |
|       | -                  | 16,183,993 | INTERGENIC | T | C | - | - |
|       | -                  | 16,184,210 | INTERGENIC | C | T | - | - |
|       | -                  | 16,185,115 | INTERGENIC | T | C | - | - |
|       | -                  | 16,185,706 | INTERGENIC | G | A | - | - |
|       | -                  | 16,185,994 | INTERGENIC | A | G | - | - |
|       | -                  | 16,186,043 | INTERGENIC | C | T | - | - |
|       | -                  | 16,186,273 | INTERGENIC | G | A | - | - |
|       | -                  | 16,186,525 | INTERGENIC | C | T | - | - |
|       | -                  | 16,186,546 | INTERGENIC | C | T | - | - |
|       | -                  | 16,190,247 | INTERGENIC | C | G | - | - |
|       | -                  | 16,191,456 | INTERGENIC | C | A | - | - |
|       | -                  | 16,193,469 | INTERGENIC | A | T | - | - |
|       | -                  | 16,194,984 | INTERGENIC | C | T | - | - |
|       | -                  | 16,194,986 | INTERGENIC | A | C | - | - |
|       | -                  | 16,195,068 | INTERGENIC | T | G | - | - |
|       | -                  | 16,195,292 | INTERGENIC | G | C | - | - |
|       | -                  | 16,195,697 | INTERGENIC | A | T | - | - |
|       | -                  | 16,195,852 | INTERGENIC | G | A | - | - |
|       | -                  | 16,204,273 | INTERGENIC | T | G | - | - |
|       | -                  | 16,204,274 | INTERGENIC | G | A | - | - |
|       | -                  | 16,205,151 | INTERGENIC | G | A | - | - |
|       | -                  | 16,205,167 | INTERGENIC | A | G | - | - |

|           |                    |            |            |   |   |   |   |
|-----------|--------------------|------------|------------|---|---|---|---|
|           | -                  | 16,205,593 | INTERGENIC | G | T | - | - |
|           | -                  | 16,210,496 | INTERGENIC | T | C | - | - |
|           | -                  | 16,211,665 | INTERGENIC | C | T | - | - |
|           | -                  | 16,211,958 | INTERGENIC | T | C | - | - |
|           | -                  | 16,212,714 | INTERGENIC | G | A | - | - |
|           | -                  | 16,212,967 | INTERGENIC | T | C | - | - |
|           | -                  | 16,213,076 | INTERGENIC | T | C | - | - |
|           | -                  | 16,214,178 | INTERGENIC | C | T | - | - |
|           | -                  | 16,214,281 | INTERGENIC | T | G | - | - |
|           | -                  | 16,214,294 | INTERGENIC | C | T | - | - |
|           | -                  | 16,214,356 | INTERGENIC | A | C | - | - |
|           | -                  | 16,214,394 | INTERGENIC | T | C | - | - |
|           | -                  | 16,216,629 | INTERGENIC | A | G | - | - |
|           | -                  | 16,217,283 | INTERGENIC | A | G | - | - |
|           | -                  | 16,218,555 | INTERGENIC | G | C | - | - |
|           | -                  | 16,219,538 | INTERGENIC | A | G | - | - |
|           | -                  | 16,220,057 | INTERGENIC | C | G | - | - |
|           | -                  | 16,221,861 | INTERGENIC | C | T | - | - |
|           | -                  | 16,222,134 | INTERGENIC | A | G | - | - |
|           | -                  | 16,223,079 | INTERGENIC | A | G | - | - |
|           | -                  | 16,224,558 | INTERGENIC | A | G | - | - |
|           | -                  | 16,225,173 | INTERGENIC | C | A | - | - |
|           | -                  | 16,226,195 | INTERGENIC | C | T | - | - |
|           | -                  | 16,226,589 | INTERGENIC | T | A | - | - |
|           | -                  | 16,228,136 | INTERGENIC | C | T | - | - |
|           | -                  | 16,228,210 | INTERGENIC | C | T | - | - |
|           | -                  | 16,229,803 | INTERGENIC | G | A | - | - |
|           | -                  | 16,230,346 | INTERGENIC | C | A | - | - |
|           | -                  | 16,230,544 | INTERGENIC | A | G | - | - |
|           | -                  | 16,230,734 | INTERGENIC | A | G | - | - |
| LOC498155 | ENSRNOT00000042421 | 16,233,188 | DOWNSTREAM | C | T | - | - |
| LOC498155 | ENSRNOT00000042421 | 16,233,890 | DOWNSTREAM | T | C | - | - |
| LOC498155 | ENSRNOT00000042421 | 16,234,192 | DOWNSTREAM | C | T | - | - |
| LOC498155 | ENSRNOT00000042421 | 16,238,834 | INTRONIC   | T | C | - | - |
| LOC498155 | ENSRNOT00000042421 | 16,239,402 | INTRONIC   | G | A | - | - |
| LOC498155 | ENSRNOT00000042421 | 16,239,900 | INTRONIC   | A | T | - | - |
| LOC498155 | ENSRNOT00000042421 | 16,239,938 | INTRONIC   | A | T | - | - |
| LOC498155 | ENSRNOT00000042421 | 16,240,281 | INTRONIC   | T | A | - | - |
| LOC498155 | ENSRNOT00000042421 | 16,240,958 | INTRONIC   | A | G | - | - |
| LOC498155 | ENSRNOT00000042421 | 16,244,021 | INTRONIC   | A | T | - | - |
| LOC498155 | ENSRNOT00000042421 | 16,244,201 | INTRONIC   | T | C | - | - |
| LOC498155 | ENSRNOT00000042421 | 16,244,542 | INTRONIC   | A | G | - | - |
| LOC498155 | ENSRNOT00000042421 | 16,244,713 | INTRONIC   | G | T | - | - |
| LOC498155 | ENSRNOT00000042421 | 16,244,794 | INTRONIC   | C | T | - | - |
| LOC498155 | ENSRNOT00000042421 | 16,244,828 | INTRONIC   | G | A | - | - |
| LOC498155 | ENSRNOT00000042421 | 16,244,993 | INTRONIC   | G | T | - | - |
| LOC498155 | ENSRNOT00000042421 | 16,244,994 | INTRONIC   | A | G | - | - |
| LOC498155 | ENSRNOT00000042421 | 16,246,233 | INTRONIC   | G | A | - | - |
| LOC498155 | ENSRNOT00000042421 | 16,248,632 | INTRONIC   | C | T | - | - |
| LOC498155 | ENSRNOT00000042421 | 16,248,883 | INTRONIC   | G | A | - | - |
| LOC498155 | ENSRNOT00000042421 | 16,249,342 | INTRONIC   | C | T | - | - |
| LOC498155 | ENSRNOT00000042421 | 16,251,884 | INTRONIC   | A | G | - | - |
| LOC498155 | ENSRNOT00000042421 | 16,252,799 | INTRONIC   | T | C | - | - |
| LOC498155 | ENSRNOT00000042421 | 16,252,880 | INTRONIC   | T | C | - | - |
| LOC498155 | ENSRNOT00000042421 | 16,253,213 | INTRONIC   | T | C | - | - |
| LOC498155 | ENSRNOT00000042421 | 16,253,371 | INTRONIC   | C | T | - | - |
| LOC498155 | ENSRNOT00000042421 | 16,254,246 | INTRONIC   | T | C | - | - |
| LOC498155 | ENSRNOT00000042421 | 16,254,277 | INTRONIC   | A | C | - | - |
| LOC498155 | ENSRNOT00000042421 | 16,254,469 | INTRONIC   | A | G | - | - |
| LOC498155 | ENSRNOT00000042421 | 16,255,161 | INTRONIC   | T | G | - | - |
| LOC498155 | ENSRNOT00000042421 | 16,256,389 | INTRONIC   | G | A | - | - |
| LOC498155 | ENSRNOT00000042421 | 16,256,863 | INTRONIC   | C | T | - | - |
| LOC498155 | ENSRNOT00000042421 | 16,257,134 | INTRONIC   | A | G | - | - |
| LOC498155 | ENSRNOT00000042421 | 16,257,197 | INTRONIC   | A | G | - | - |
| LOC498155 | ENSRNOT00000042421 | 16,257,978 | INTRONIC   | T | G | - | - |
| LOC498155 | ENSRNOT00000042421 | 16,258,056 | INTRONIC   | G | A | - | - |
| LOC498155 | ENSRNOT00000042421 | 16,258,327 | INTRONIC   | G | A | - | - |
| LOC498155 | ENSRNOT00000042421 | 16,258,990 | INTRONIC   | A | G | - | - |
| LOC498155 | ENSRNOT00000042421 | 16,262,332 | INTRONIC   | G | A | - | - |
| LOC498155 | ENSRNOT00000042421 | 16,263,720 | INTRONIC   | G | A | - | - |
| LOC498155 | ENSRNOT00000042421 | 16,264,428 | INTRONIC   | C | T | - | - |
| LOC498155 | ENSRNOT00000042421 | 16,265,080 | INTRONIC   | C | T | - | - |
| LOC498155 | ENSRNOT00000042421 | 16,265,127 | INTRONIC   | A | G | - | - |
| LOC498155 | ENSRNOT00000042421 | 16,265,410 | INTRONIC   | G | A | - | - |
| LOC498155 | ENSRNOT00000042421 | 16,266,489 | INTRONIC   | G | A | - | - |
| LOC498155 | ENSRNOT00000042421 | 16,266,698 | INTRONIC   | C | T | - | - |
| LOC498155 | ENSRNOT00000042421 | 16,268,125 | INTRONIC   | T | C | - | - |
| LOC498155 | ENSRNOT00000042421 | 16,268,211 | INTRONIC   | G | A | - | - |
| LOC498155 | ENSRNOT00000042421 | 16,269,355 | INTRONIC   | T | A | - | - |
| LOC498155 | ENSRNOT00000042421 | 16,269,357 | INTRONIC   | A | T | - | - |

|           |                    |            |            |   |   |   |   |
|-----------|--------------------|------------|------------|---|---|---|---|
| LOC498155 | ENSRNOT00000042421 | 16,269,819 | INTRONIC   | C | T | - | - |
| LOC498155 | ENSRNOT00000042421 | 16,269,863 | INTRONIC   | C | G | - | - |
| LOC498155 | ENSRNOT00000042421 | 16,270,640 | INTRONIC   | G | C | - | - |
| LOC498155 | ENSRNOT00000042421 | 16,274,607 | INTRONIC   | T | C | - | - |
| LOC498155 | ENSRNOT00000042421 | 16,275,031 | INTRONIC   | A | G | - | - |
| LOC498155 | ENSRNOT00000042421 | 16,276,144 | INTRONIC   | C | T | - | - |
| LOC498155 | ENSRNOT00000042421 | 16,276,633 | INTRONIC   | G | C | - | - |
| LOC498155 | ENSRNOT00000042421 | 16,276,635 | INTRONIC   | G | C | - | - |
| LOC498155 | ENSRNOT00000042421 | 16,277,113 | INTRONIC   | G | A | - | - |
| LOC498155 | ENSRNOT00000042421 | 16,280,816 | INTRONIC   | C | G | - | - |
| LOC498155 | ENSRNOT00000042421 | 16,282,670 | INTRONIC   | A | G | - | - |
| LOC498155 | ENSRNOT00000042421 | 16,282,693 | INTRONIC   | G | A | - | - |
| LOC498155 | ENSRNOT00000042421 | 16,282,782 | INTRONIC   | G | A | - | - |
| LOC498155 | ENSRNOT00000042421 | 16,282,993 | INTRONIC   | T | C | - | - |
| LOC498155 | ENSRNOT00000042421 | 16,283,824 | INTRONIC   | T | C | - | - |
| LOC498155 | ENSRNOT00000042421 | 16,283,879 | INTRONIC   | T | C | - | - |
| LOC498155 | ENSRNOT00000042421 | 16,283,952 | INTRONIC   | T | C | - | - |
| LOC498155 | ENSRNOT00000042421 | 16,284,112 | INTRONIC   | C | T | - | - |
| LOC498155 | ENSRNOT00000042421 | 16,284,264 | INTRONIC   | C | T | - | - |
| LOC498155 | ENSRNOT00000042421 | 16,284,347 | INTRONIC   | G | A | - | - |
| LOC498155 | ENSRNOT00000042421 | 16,284,581 | INTRONIC   | G | A | - | - |
| LOC498155 | ENSRNOT00000042421 | 16,284,790 | INTRONIC   | C | G | - | - |
| LOC498155 | ENSRNOT00000042421 | 16,284,951 | INTRONIC   | A | G | - | - |
| LOC498155 | ENSRNOT00000042421 | 16,285,342 | INTRONIC   | G | A | - | - |
| LOC498155 | ENSRNOT00000042421 | 16,285,424 | INTRONIC   | T | C | - | - |
| LOC498155 | ENSRNOT00000042421 | 16,285,918 | INTRONIC   | G | A | - | - |
| LOC498155 | ENSRNOT00000042421 | 16,285,933 | INTRONIC   | T | C | - | - |
| LOC498155 | ENSRNOT00000042421 | 16,286,012 | INTRONIC   | C | T | - | - |
| LOC498155 | ENSRNOT00000042421 | 16,286,404 | INTRONIC   | T | C | - | - |
| LOC498155 | ENSRNOT00000042421 | 16,286,489 | INTRONIC   | A | G | - | - |
| LOC498155 | ENSRNOT00000042421 | 16,291,890 | INTRONIC   | G | A | - | - |
| LOC498155 | ENSRNOT00000042421 | 16,292,318 | INTRONIC   | G | C | - | - |
| LOC498155 | ENSRNOT00000042421 | 16,292,689 | INTRONIC   | T | C | - | - |
| -         | -                  | 16,324,141 | INTERGENIC | A | G | - | - |
| -         | -                  | 16,324,212 | INTERGENIC | C | T | - | - |
| -         | -                  | 16,324,623 | INTERGENIC | A | G | - | - |
| -         | -                  | 16,325,838 | INTERGENIC | A | G | - | - |
| LOC686521 | ENSRNOT00000060192 | 16,327,648 | DOWNSTREAM | T | A | - | - |
| LOC686521 | ENSRNOT00000060192 | 16,330,598 | DOWNSTREAM | C | T | - | - |
| LOC686521 | ENSRNOT00000060192 | 16,332,007 | DOWNSTREAM | T | C | - | - |
| LOC686521 | ENSRNOT00000060192 | 16,334,354 | UPSTREAM   | C | T | - | - |
| LOC686521 | ENSRNOT00000060192 | 16,334,886 | UPSTREAM   | T | A | - | - |
| Fam20c    | ENSRNOT00000001783 | 16,335,477 | DOWNSTREAM | A | G | - | - |
| Fam20c    | ENSRNOT00000001783 | 16,335,709 | DOWNSTREAM | A | G | - | - |
| Fam20c    | ENSRNOT00000001783 | 16,336,552 | DOWNSTREAM | T | C | - | - |
| Fam20c    | ENSRNOT00000001783 | 16,336,594 | DOWNSTREAM | G | C | - | - |
| Fam20c    | ENSRNOT00000001783 | 16,336,610 | DOWNSTREAM | G | C | - | - |
| Fam20c    | ENSRNOT00000001783 | 16,336,625 | DOWNSTREAM | C | T | - | - |
| Fam20c    | ENSRNOT00000001783 | 16,336,631 | DOWNSTREAM | G | A | - | - |
| Fam20c    | ENSRNOT00000001783 | 16,336,758 | DOWNSTREAM | A | C | - | - |
| Fam20c    | ENSRNOT00000001783 | 16,336,845 | DOWNSTREAM | C | T | - | - |
| Fam20c    | ENSRNOT00000001783 | 16,336,893 | DOWNSTREAM | C | T | - | - |
| Fam20c    | ENSRNOT00000001783 | 16,337,169 | DOWNSTREAM | A | G | - | - |
| Fam20c    | ENSRNOT00000001783 | 16,337,171 | DOWNSTREAM | C | T | - | - |
| Fam20c    | ENSRNOT00000001783 | 16,337,198 | DOWNSTREAM | T | C | - | - |
| Fam20c    | ENSRNOT00000001783 | 16,337,515 | DOWNSTREAM | T | C | - | - |
| Fam20c    | ENSRNOT00000001783 | 16,337,630 | DOWNSTREAM | G | C | - | - |
| Fam20c    | ENSRNOT00000001783 | 16,337,668 | DOWNSTREAM | T | C | - | - |
| Fam20c    | ENSRNOT00000001783 | 16,337,823 | DOWNSTREAM | A | T | - | - |
| Fam20c    | ENSRNOT00000001783 | 16,337,871 | DOWNSTREAM | T | G | - | - |
| Fam20c    | ENSRNOT00000001783 | 16,338,215 | DOWNSTREAM | C | T | - | - |
| Fam20c    | ENSRNOT00000001783 | 16,338,555 | DOWNSTREAM | G | A | - | - |
| Fam20c    | ENSRNOT00000001783 | 16,338,680 | DOWNSTREAM | A | G | - | - |
| Fam20c    | ENSRNOT00000001783 | 16,339,458 | DOWNSTREAM | G | C | - | - |
| Fam20c    | ENSRNOT00000001783 | 16,339,622 | DOWNSTREAM | C | T | - | - |
| Fam20c    | ENSRNOT00000001783 | 16,339,631 | DOWNSTREAM | C | T | - | - |
| Fam20c    | ENSRNOT00000001783 | 16,341,475 | INTRONIC   | G | A | - | - |
| Fam20c    | ENSRNOT00000001783 | 16,341,603 | INTRONIC   | T | C | - | - |
| Fam20c    | ENSRNOT00000001783 | 16,343,346 | INTRONIC   | C | G | - | - |
| Fam20c    | ENSRNOT00000001783 | 16,346,341 | INTRONIC   | T | C | - | - |
| Fam20c    | ENSRNOT00000001783 | 16,348,108 | INTRONIC   | G | T | - | - |
| Fam20c    | ENSRNOT00000001783 | 16,349,633 | INTRONIC   | A | T | - | - |
| Fam20c    | ENSRNOT00000001783 | 16,349,699 | INTRONIC   | G | A | - | - |
| Fam20c    | ENSRNOT00000001783 | 16,350,550 | INTRONIC   | T | A | - | - |
| Fam20c    | ENSRNOT00000001783 | 16,350,747 | INTRONIC   | T | A | - | - |
| Fam20c    | ENSRNOT00000001783 | 16,352,121 | INTRONIC   | A | G | - | - |
| Fam20c    | ENSRNOT00000001783 | 16,352,146 | INTRONIC   | A | G | - | - |
| Fam20c    | ENSRNOT00000001783 | 16,356,515 | INTRONIC   | A | G | - | - |
| Fam20c    | ENSRNOT00000001783 | 16,358,111 | INTRONIC   | A | G | - | - |
| Fam20c    | ENSRNOT00000001783 | 16,360,277 | INTRONIC   | A | C | - | - |

|        |                    |            |            |   |   |   |   |
|--------|--------------------|------------|------------|---|---|---|---|
| Fam20c | ENSRNOT00000001783 | 16,360,289 | INTRONIC   | G | A | - | - |
| Fam20c | ENSRNOT00000001783 | 16,360,355 | INTRONIC   | C | G | - | - |
| Fam20c | ENSRNOT00000001783 | 16,360,601 | INTRONIC   | G | A | - | - |
| Fam20c | ENSRNOT00000001783 | 16,361,104 | INTRONIC   | G | A | - | - |
| Fam20c | ENSRNOT00000001783 | 16,361,547 | INTRONIC   | T | A | - | - |
| Fam20c | ENSRNOT00000001783 | 16,361,564 | INTRONIC   | C | G | - | - |
| Fam20c | ENSRNOT00000001783 | 16,361,599 | INTRONIC   | A | G | - | - |
| Fam20c | ENSRNOT00000001783 | 16,362,959 | INTRONIC   | T | C | - | - |
| Fam20c | ENSRNOT00000001783 | 16,363,777 | INTRONIC   | G | C | - | - |
| Fam20c | ENSRNOT00000001783 | 16,363,839 | INTRONIC   | A | C | - | - |
| Fam20c | ENSRNOT00000001783 | 16,363,927 | INTRONIC   | G | A | - | - |
| Fam20c | ENSRNOT00000001783 | 16,364,362 | INTRONIC   | T | C | - | - |
| Fam20c | ENSRNOT00000001783 | 16,364,818 | INTRONIC   | C | T | - | - |
| Fam20c | ENSRNOT00000001783 | 16,365,160 | INTRONIC   | T | A | - | - |
| Fam20c | ENSRNOT00000001783 | 16,365,823 | INTRONIC   | G | A | - | - |
| Fam20c | ENSRNOT00000001783 | 16,367,619 | INTRONIC   | T | C | - | - |
| Fam20c | ENSRNOT00000001783 | 16,368,224 | INTRONIC   | C | T | - | - |
| Fam20c | ENSRNOT00000001783 | 16,369,780 | INTRONIC   | G | C | - | - |
| Fam20c | ENSRNOT00000001783 | 16,369,963 | INTRONIC   | A | T | - | - |
| Fam20c | ENSRNOT00000001783 | 16,370,323 | INTRONIC   | A | T | - | - |
| Fam20c | ENSRNOT00000001783 | 16,370,345 | INTRONIC   | G | A | - | - |
| Fam20c | ENSRNOT00000001783 | 16,370,358 | INTRONIC   | C | T | - | - |
| Fam20c | ENSRNOT00000001783 | 16,370,433 | INTRONIC   | G | A | - | - |
| Fam20c | ENSRNOT00000001783 | 16,370,460 | INTRONIC   | T | C | - | - |
| Fam20c | ENSRNOT00000001783 | 16,370,676 | INTRONIC   | A | C | - | - |
| Fam20c | ENSRNOT00000001783 | 16,370,881 | INTRONIC   | A | G | - | - |
| Fam20c | ENSRNOT00000001783 | 16,370,882 | INTRONIC   | C | T | - | - |
| Fam20c | ENSRNOT00000001783 | 16,370,927 | INTRONIC   | G | A | - | - |
| Fam20c | ENSRNOT00000001783 | 16,370,934 | INTRONIC   | G | A | - | - |
| Fam20c | ENSRNOT00000001783 | 16,370,961 | INTRONIC   | G | T | - | - |
| Fam20c | ENSRNOT00000001783 | 16,371,010 | INTRONIC   | T | A | - | - |
| Fam20c | ENSRNOT00000001783 | 16,371,066 | INTRONIC   | T | G | - | - |
| Fam20c | ENSRNOT00000001783 | 16,373,955 | INTRONIC   | C | T | - | - |
| Fam20c | ENSRNOT00000001783 | 16,374,608 | INTRONIC   | C | T | - | - |
| Fam20c | ENSRNOT00000001783 | 16,374,629 | INTRONIC   | A | C | - | - |
| Fam20c | ENSRNOT00000001783 | 16,376,167 | INTRONIC   | C | T | - | - |
| Fam20c | ENSRNOT00000001783 | 16,377,296 | INTRONIC   | T | C | - | - |
| Fam20c | ENSRNOT00000001783 | 16,377,620 | INTRONIC   | T | C | - | - |
| Fam20c | ENSRNOT00000001783 | 16,378,289 | INTRONIC   | T | A | - | - |
| Fam20c | ENSRNOT00000001783 | 16,378,854 | INTRONIC   | A | G | - | - |
| Fam20c | ENSRNOT00000001783 | 16,379,011 | INTRONIC   | C | T | - | - |
| Fam20c | ENSRNOT00000001783 | 16,379,014 | INTRONIC   | T | C | - | - |
| Fam20c | ENSRNOT00000001783 | 16,379,104 | INTRONIC   | C | T | - | - |
| Fam20c | ENSRNOT00000001783 | 16,379,161 | INTRONIC   | G | A | - | - |
| Fam20c | ENSRNOT00000001783 | 16,379,335 | INTRONIC   | C | T | - | - |
| Fam20c | ENSRNOT00000001783 | 16,379,501 | INTRONIC   | C | T | - | - |
| Fam20c | ENSRNOT00000001783 | 16,379,789 | INTRONIC   | A | G | - | - |
| Fam20c | ENSRNOT00000001783 | 16,380,440 | INTRONIC   | T | G | - | - |
| Fam20c | ENSRNOT00000001783 | 16,380,499 | INTRONIC   | A | C | - | - |
| Fam20c | ENSRNOT00000001783 | 16,381,025 | INTRONIC   | T | C | - | - |
| Fam20c | ENSRNOT00000001783 | 16,381,952 | INTRONIC   | T | C | - | - |
| Fam20c | ENSRNOT00000001783 | 16,382,128 | INTRONIC   | A | G | - | - |
| Fam20c | ENSRNOT00000001783 | 16,383,353 | INTRONIC   | C | T | - | - |
| Fam20c | ENSRNOT00000001783 | 16,383,359 | INTRONIC   | T | C | - | - |
| Fam20c | ENSRNOT00000001783 | 16,383,380 | INTRONIC   | T | C | - | - |
| Fam20c | ENSRNOT00000001783 | 16,384,422 | INTRONIC   | T | C | - | - |
| Fam20c | ENSRNOT00000001783 | 16,385,141 | INTRONIC   | C | A | - | - |
| Fam20c | ENSRNOT00000001783 | 16,388,203 | INTRONIC   | A | G | - | - |
| Fam20c | ENSRNOT00000001783 | 16,388,205 | INTRONIC   | T | G | - | - |
| Fam20c | ENSRNOT00000001783 | 16,389,789 | INTRONIC   | C | G | - | - |
| Fam20c | ENSRNOT00000001783 | 16,390,086 | INTRONIC   | T | C | - | - |
| Fam20c | ENSRNOT00000001783 | 16,390,466 | INTRONIC   | G | A | - | - |
| Fam20c | ENSRNOT00000001783 | 16,390,792 | INTRONIC   | A | G | - | - |
| Fam20c | ENSRNOT00000001783 | 16,392,291 | INTRONIC   | G | A | - | - |
| Fam20c | ENSRNOT00000001783 | 16,393,331 | INTRONIC   | G | A | - | - |
| Fam20c | ENSRNOT00000001783 | 16,393,457 | INTRONIC   | T | C | - | - |
| Fam20c | ENSRNOT00000001783 | 16,393,698 | INTRONIC   | A | G | - | - |
| Fam20c | ENSRNOT00000001783 | 16,393,949 | INTRONIC   | C | T | - | - |
| Fam20c | ENSRNOT00000001783 | 16,393,959 | INTRONIC   | A | G | - | - |
| Fam20c | ENSRNOT00000001783 | 16,398,150 | INTRONIC   | T | G | - | - |
| -      | -                  | 16,410,307 | INTERGENIC | A | G | - | - |
| -      | -                  | 16,410,638 | INTERGENIC | A | G | - | - |
| -      | -                  | 16,419,802 | INTERGENIC | A | G | - | - |
| -      | -                  | 16,421,469 | INTERGENIC | G | T | - | - |
| -      | -                  | 16,424,118 | INTERGENIC | C | A | - | - |
| -      | -                  | 16,424,327 | INTERGENIC | G | A | - | - |
| -      | -                  | 16,425,629 | INTERGENIC | T | C | - | - |
| -      | -                  | 16,426,984 | INTERGENIC | G | A | - | - |
| -      | -                  | 16,428,183 | INTERGENIC | G | A | - | - |
| -      | -                  | 16,428,862 | INTERGENIC | C | T | - | - |

|   |            |            |   |   |   |   |
|---|------------|------------|---|---|---|---|
| - | 16,428,983 | INTERGENIC | C | A | - | - |
| - | 16,429,429 | INTERGENIC | T | C | - | - |
| - | 16,429,462 | INTERGENIC | C | T | - | - |
| - | 16,429,647 | INTERGENIC | T | C | - | - |
| - | 16,429,688 | INTERGENIC | T | C | - | - |
| - | 16,429,694 | INTERGENIC | A | G | - | - |
| - | 16,429,967 | INTERGENIC | T | C | - | - |
| - | 16,430,193 | INTERGENIC | G | A | - | - |
| - | 16,430,616 | INTERGENIC | C | G | - | - |
| - | 16,432,572 | INTERGENIC | T | C | - | - |
| - | 16,432,602 | INTERGENIC | C | A | - | - |
| - | 16,433,267 | INTERGENIC | C | A | - | - |
| - | 16,434,581 | INTERGENIC | C | T | - | - |
| - | 16,434,728 | INTERGENIC | T | C | - | - |
| - | 16,438,385 | INTERGENIC | A | T | - | - |
| - | 16,439,476 | INTERGENIC | C | T | - | - |
| - | 16,439,593 | INTERGENIC | T | C | - | - |
| - | 16,439,770 | INTERGENIC | T | C | - | - |
| - | 16,440,339 | INTERGENIC | G | T | - | - |
| - | 16,440,445 | INTERGENIC | T | C | - | - |
| - | 16,440,472 | INTERGENIC | G | A | - | - |
| - | 16,440,557 | INTERGENIC | A | G | - | - |
| - | 16,440,633 | INTERGENIC | G | A | - | - |
| - | 16,440,716 | INTERGENIC | C | T | - | - |
| - | 16,440,786 | INTERGENIC | C | T | - | - |
| - | 16,441,046 | INTERGENIC | A | G | - | - |
| - | 16,441,101 | INTERGENIC | C | T | - | - |
| - | 16,441,236 | INTERGENIC | T | C | - | - |
| - | 16,441,451 | INTERGENIC | T | C | - | - |
| - | 16,441,626 | INTERGENIC | C | T | - | - |
| - | 16,441,753 | INTERGENIC | C | T | - | - |
| - | 16,441,945 | INTERGENIC | G | T | - | - |
| - | 16,441,946 | INTERGENIC | G | C | - | - |
| - | 16,442,169 | INTERGENIC | G | A | - | - |
| - | 16,442,381 | INTERGENIC | T | C | - | - |
| - | 16,442,473 | INTERGENIC | C | T | - | - |
| - | 16,442,492 | INTERGENIC | A | G | - | - |
| - | 16,442,539 | INTERGENIC | A | G | - | - |
| - | 16,442,637 | INTERGENIC | G | A | - | - |
| - | 16,443,253 | INTERGENIC | A | C | - | - |
| - | 16,443,261 | INTERGENIC | A | C | - | - |
| - | 16,443,286 | INTERGENIC | A | G | - | - |
| - | 16,443,495 | INTERGENIC | T | G | - | - |
| - | 16,443,568 | INTERGENIC | C | T | - | - |
| - | 16,443,665 | INTERGENIC | A | C | - | - |
| - | 16,443,996 | INTERGENIC | T | A | - | - |
| - | 16,444,035 | INTERGENIC | T | C | - | - |
| - | 16,444,512 | INTERGENIC | G | A | - | - |
| - | 16,444,609 | INTERGENIC | T | C | - | - |
| - | 16,444,612 | INTERGENIC | G | A | - | - |
| - | 16,444,661 | INTERGENIC | G | T | - | - |
| - | 16,444,785 | INTERGENIC | C | A | - | - |
| - | 16,444,832 | INTERGENIC | A | G | - | - |
| - | 16,444,964 | INTERGENIC | C | A | - | - |
| - | 16,444,965 | INTERGENIC | A | T | - | - |
| - | 16,445,089 | INTERGENIC | C | T | - | - |
| - | 16,445,093 | INTERGENIC | A | G | - | - |
| - | 16,445,238 | INTERGENIC | T | C | - | - |
| - | 16,445,329 | INTERGENIC | C | T | - | - |
| - | 16,445,436 | INTERGENIC | C | T | - | - |
| - | 16,445,460 | INTERGENIC | C | A | - | - |
| - | 16,445,605 | INTERGENIC | G | A | - | - |
| - | 16,445,650 | INTERGENIC | T | G | - | - |
| - | 16,445,681 | INTERGENIC | A | G | - | - |
| - | 16,445,807 | INTERGENIC | T | C | - | - |
| - | 16,445,814 | INTERGENIC | C | T | - | - |
| - | 16,445,902 | INTERGENIC | G | A | - | - |
| - | 16,446,011 | INTERGENIC | G | C | - | - |
| - | 16,446,082 | INTERGENIC | C | T | - | - |
| - | 16,446,164 | INTERGENIC | A | T | - | - |
| - | 16,446,395 | INTERGENIC | T | C | - | - |
| - | 16,446,402 | INTERGENIC | G | A | - | - |
| - | 16,446,441 | INTERGENIC | C | A | - | - |
| - | 16,446,516 | INTERGENIC | C | T | - | - |
| - | 16,446,529 | INTERGENIC | G | A | - | - |
| - | 16,446,545 | INTERGENIC | A | G | - | - |
| - | 16,446,569 | INTERGENIC | C | T | - | - |
| - | 16,446,591 | INTERGENIC | C | T | - | - |
| - | 16,446,603 | INTERGENIC | G | A | - | - |
| - | 16,446,658 | INTERGENIC | G | A | - | - |



|   |            |            |   |   |   |   |
|---|------------|------------|---|---|---|---|
| - | 16,446,749 | INTERGENIC | G | A | - | - |
| - | 16,446,865 | INTERGENIC | C | A | - | - |
| - | 16,446,873 | INTERGENIC | T | C | - | - |
| - | 16,447,042 | INTERGENIC | C | T | - | - |
| - | 16,447,058 | INTERGENIC | C | T | - | - |
| - | 16,447,078 | INTERGENIC | T | G | - | - |
| - | 16,447,095 | INTERGENIC | C | T | - | - |
| - | 16,447,175 | INTERGENIC | T | C | - | - |
| - | 16,447,412 | INTERGENIC | A | G | - | - |
| - | 16,447,630 | INTERGENIC | C | T | - | - |
| - | 16,447,804 | INTERGENIC | G | A | - | - |
| - | 16,447,918 | INTERGENIC | C | T | - | - |
| - | 16,447,929 | INTERGENIC | A | T | - | - |
| - | 16,447,948 | INTERGENIC | C | G | - | - |
| - | 16,448,051 | INTERGENIC | A | G | - | - |
| - | 16,448,104 | INTERGENIC | G | C | - | - |
| - | 16,448,421 | INTERGENIC | C | A | - | - |
| - | 16,448,554 | INTERGENIC | A | T | - | - |
| - | 16,448,555 | INTERGENIC | A | T | - | - |
| - | 16,448,601 | INTERGENIC | A | G | - | - |
| - | 16,448,752 | INTERGENIC | C | A | - | - |
| - | 16,448,796 | INTERGENIC | G | T | - | - |
| - | 16,448,797 | INTERGENIC | C | T | - | - |
| - | 16,448,827 | INTERGENIC | A | G | - | - |
| - | 16,448,984 | INTERGENIC | A | T | - | - |
| - | 16,448,985 | INTERGENIC | A | G | - | - |
| - | 16,449,021 | INTERGENIC | A | C | - | - |
| - | 16,449,266 | INTERGENIC | A | T | - | - |
| - | 16,450,008 | INTERGENIC | T | C | - | - |
| - | 16,450,249 | INTERGENIC | G | A | - | - |
| - | 16,450,280 | INTERGENIC | T | C | - | - |
| - | 16,450,305 | INTERGENIC | T | G | - | - |
| - | 16,450,329 | INTERGENIC | T | C | - | - |
| - | 16,450,338 | INTERGENIC | C | T | - | - |
| - | 16,450,403 | INTERGENIC | A | G | - | - |
| - | 16,450,406 | INTERGENIC | A | G | - | - |
| - | 16,450,432 | INTERGENIC | C | T | - | - |
| - | 16,450,446 | INTERGENIC | T | G | - | - |
| - | 16,450,691 | INTERGENIC | G | T | - | - |
| - | 16,450,745 | INTERGENIC | G | A | - | - |
| - | 16,450,769 | INTERGENIC | A | G | - | - |
| - | 16,450,888 | INTERGENIC | A | C | - | - |
| - | 16,451,008 | INTERGENIC | C | T | - | - |
| - | 16,451,021 | INTERGENIC | G | T | - | - |
| - | 16,451,074 | INTERGENIC | A | G | - | - |
| - | 16,451,084 | INTERGENIC | A | G | - | - |
| - | 16,451,096 | INTERGENIC | T | C | - | - |
| - | 16,451,140 | INTERGENIC | G | A | - | - |
| - | 16,451,181 | INTERGENIC | A | C | - | - |
| - | 16,451,329 | INTERGENIC | C | T | - | - |
| - | 16,451,338 | INTERGENIC | C | A | - | - |
| - | 16,451,493 | INTERGENIC | G | A | - | - |
| - | 16,451,497 | INTERGENIC | A | G | - | - |
| - | 16,451,635 | INTERGENIC | T | C | - | - |
| - | 16,451,721 | INTERGENIC | G | A | - | - |
| - | 16,451,829 | INTERGENIC | T | G | - | - |
| - | 16,451,913 | INTERGENIC | G | A | - | - |
| - | 16,451,951 | INTERGENIC | T | A | - | - |
| - | 16,452,492 | INTERGENIC | C | T | - | - |
| - | 16,453,013 | INTERGENIC | T | C | - | - |
| - | 16,453,180 | INTERGENIC | C | T | - | - |
| - | 16,453,181 | INTERGENIC | G | A | - | - |
| - | 16,453,719 | INTERGENIC | T | C | - | - |
| - | 16,454,063 | INTERGENIC | A | G | - | - |
| - | 16,454,064 | INTERGENIC | G | C | - | - |
| - | 16,454,135 | INTERGENIC | C | T | - | - |
| - | 16,454,251 | INTERGENIC | G | A | - | - |
| - | 16,454,254 | INTERGENIC | C | T | - | - |
| - | 16,454,351 | INTERGENIC | A | G | - | - |
| - | 16,454,393 | INTERGENIC | A | C | - | - |
| - | 16,454,448 | INTERGENIC | C | G | - | - |
| - | 16,454,509 | INTERGENIC | G | C | - | - |
| - | 16,454,748 | INTERGENIC | T | C | - | - |
| - | 16,454,903 | INTERGENIC | C | T | - | - |
| - | 16,455,012 | INTERGENIC | C | T | - | - |
| - | 16,455,063 | INTERGENIC | C | T | - | - |
| - | 16,455,134 | INTERGENIC | G | A | - | - |
| - | 16,455,138 | INTERGENIC | A | G | - | - |
| - | 16,455,176 | INTERGENIC | C | T | - | - |
| - | 16,455,203 | INTERGENIC | C | T | - | - |

|   |            |            |   |   |   |   |
|---|------------|------------|---|---|---|---|
| - | 16,455,485 | INTERGENIC | A | G | - | - |
| - | 16,455,514 | INTERGENIC | C | T | - | - |
| - | 16,455,535 | INTERGENIC | C | T | - | - |
| - | 16,455,541 | INTERGENIC | A | T | - | - |
| - | 16,455,630 | INTERGENIC | G | A | - | - |
| - | 16,455,811 | INTERGENIC | T | C | - | - |
| - | 16,455,837 | INTERGENIC | T | C | - | - |
| - | 16,455,876 | INTERGENIC | A | G | - | - |
| - | 16,455,889 | INTERGENIC | A | G | - | - |
| - | 16,455,923 | INTERGENIC | G | A | - | - |
| - | 16,456,815 | INTERGENIC | A | C | - | - |
| - | 16,456,926 | INTERGENIC | T | C | - | - |
| - | 16,457,625 | INTERGENIC | A | G | - | - |
| - | 16,457,666 | INTERGENIC | A | G | - | - |
| - | 16,457,937 | INTERGENIC | T | C | - | - |
| - | 16,458,833 | INTERGENIC | A | C | - | - |
| - | 16,460,741 | INTERGENIC | T | A | - | - |
| - | 16,460,743 | INTERGENIC | T | A | - | - |
| - | 16,461,186 | INTERGENIC | A | G | - | - |
| - | 16,462,526 | INTERGENIC | C | G | - | - |
| - | 16,463,371 | INTERGENIC | C | T | - | - |
| - | 16,463,500 | INTERGENIC | G | A | - | - |
| - | 16,463,546 | INTERGENIC | G | A | - | - |
| - | 16,465,488 | INTERGENIC | A | G | - | - |
| - | 16,465,653 | INTERGENIC | T | C | - | - |
| - | 16,465,670 | INTERGENIC | G | C | - | - |
| - | 16,466,033 | INTERGENIC | C | T | - | - |
| - | 16,466,731 | INTERGENIC | G | T | - | - |
| - | 16,466,867 | INTERGENIC | T | C | - | - |
| - | 16,467,086 | INTERGENIC | G | T | - | - |
| - | 16,467,264 | INTERGENIC | T | C | - | - |
| - | 16,467,367 | INTERGENIC | T | C | - | - |
| - | 16,467,402 | INTERGENIC | G | A | - | - |
| - | 16,467,501 | INTERGENIC | A | G | - | - |
| - | 16,467,937 | INTERGENIC | T | A | - | - |
| - | 16,468,042 | INTERGENIC | G | A | - | - |
| - | 16,468,388 | INTERGENIC | G | C | - | - |
| - | 16,468,927 | INTERGENIC | C | T | - | - |
| - | 16,469,452 | INTERGENIC | A | G | - | - |
| - | 16,469,878 | INTERGENIC | G | A | - | - |
| - | 16,469,939 | INTERGENIC | T | C | - | - |
| - | 16,470,499 | INTERGENIC | C | A | - | - |
| - | 16,470,850 | INTERGENIC | T | C | - | - |
| - | 16,470,862 | INTERGENIC | C | T | - | - |
| - | 16,470,985 | INTERGENIC | G | A | - | - |
| - | 16,471,216 | INTERGENIC | G | A | - | - |
| - | 16,472,088 | INTERGENIC | C | T | - | - |
| - | 16,472,423 | INTERGENIC | A | G | - | - |
| - | 16,472,589 | INTERGENIC | T | G | - | - |
| - | 16,472,662 | INTERGENIC | G | A | - | - |
| - | 16,472,667 | INTERGENIC | A | G | - | - |
| - | 16,472,771 | INTERGENIC | A | T | - | - |
| - | 16,472,816 | INTERGENIC | T | C | - | - |
| - | 16,472,854 | INTERGENIC | T | C | - | - |
| - | 16,472,871 | INTERGENIC | T | C | - | - |
| - | 16,473,242 | INTERGENIC | C | T | - | - |
| - | 16,473,270 | INTERGENIC | C | T | - | - |
| - | 16,473,301 | INTERGENIC | C | T | - | - |
| - | 16,473,340 | INTERGENIC | T | C | - | - |
| - | 16,473,356 | INTERGENIC | C | T | - | - |
| - | 16,473,477 | INTERGENIC | C | T | - | - |
| - | 16,473,583 | INTERGENIC | C | T | - | - |
| - | 16,473,643 | INTERGENIC | T | C | - | - |
| - | 16,473,780 | INTERGENIC | G | A | - | - |
| - | 16,474,210 | INTERGENIC | A | C | - | - |
| - | 16,474,444 | INTERGENIC | T | G | - | - |
| - | 16,474,773 | INTERGENIC | T | G | - | - |
| - | 16,474,973 | INTERGENIC | G | A | - | - |
| - | 16,475,017 | INTERGENIC | A | G | - | - |
| - | 16,475,113 | INTERGENIC | G | A | - | - |
| - | 16,475,151 | INTERGENIC | T | C | - | - |
| - | 16,475,390 | INTERGENIC | T | C | - | - |
| - | 16,475,427 | INTERGENIC | G | A | - | - |
| - | 16,475,582 | INTERGENIC | C | T | - | - |
| - | 16,475,622 | INTERGENIC | C | T | - | - |
| - | 16,475,751 | INTERGENIC | G | A | - | - |
| - | 16,475,985 | INTERGENIC | C | G | - | - |
| - | 16,476,025 | INTERGENIC | C | T | - | - |
| - | 16,476,063 | INTERGENIC | C | T | - | - |
| - | 16,476,064 | INTERGENIC | G | A | - | - |

|            |                    |            |                       |   |   |   |   |
|------------|--------------------|------------|-----------------------|---|---|---|---|
| -          | -                  | 16,476,141 | INTERGENIC            | C | T | - | - |
| -          | -                  | 16,476,279 | INTERGENIC            | G | A | - | - |
| -          | -                  | 16,477,452 | INTERGENIC            | T | C | - | - |
| -          | -                  | 16,477,630 | INTERGENIC            | G | A | - | - |
| -          | -                  | 16,477,668 | INTERGENIC            | C | T | - | - |
| -          | -                  | 16,477,805 | INTERGENIC            | G | A | - | - |
| -          | -                  | 16,477,917 | INTERGENIC            | C | T | - | - |
| -          | -                  | 16,478,181 | INTERGENIC            | G | A | - | - |
| -          | -                  | 16,478,305 | INTERGENIC            | C | G | - | - |
| -          | -                  | 16,478,689 | INTERGENIC            | T | G | - | - |
| RGD1566386 | ENSRNOT00000028927 | 16,485,024 | DOWNSTREAM            | G | A | - | - |
| RGD1566386 | ENSRNOT00000028927 | 16,485,136 | DOWNSTREAM            | T | C | - | - |
| RGD1566386 | ENSRNOT00000028927 | 16,485,444 | DOWNSTREAM            | G | A | - | - |
| RGD1566386 | ENSRNOT00000028927 | 16,486,605 | 3PRIME_UTR            | A | G | - | - |
| RGD1566386 | ENSRNOT00000028927 | 16,487,524 | SYNONYMOUS_CODING     | T | G | - | - |
| RGD1566386 | ENSRNOT00000028927 | 16,488,716 | NON_SYNONYMOUS_CODING | C | A | C | F |
| RGD1566386 | ENSRNOT00000028927 | 16,489,143 | INTRONIC              | G | A | - | - |
| RGD1566386 | ENSRNOT00000028927 | 16,489,188 | INTRONIC              | G | C | - | - |
| RGD1566386 | ENSRNOT00000028927 | 16,489,212 | INTRONIC              | C | A | - | - |
| RGD1566386 | ENSRNOT00000028927 | 16,494,022 | INTRONIC              | G | A | - | - |
| RGD1566386 | ENSRNOT00000028927 | 16,494,847 | INTRONIC              | A | T | - | - |
| RGD1566386 | ENSRNOT00000028927 | 16,494,906 | INTRONIC              | T | C | - | - |
| RGD1566386 | ENSRNOT00000028927 | 16,495,000 | INTRONIC              | A | G | - | - |
| RGD1566386 | ENSRNOT00000028927 | 16,499,124 | INTRONIC              | C | T | - | - |
| RGD1566386 | ENSRNOT00000028927 | 16,499,334 | INTRONIC              | G | A | - | - |
| RGD1566386 | ENSRNOT00000028927 | 16,499,558 | INTRONIC              | T | G | - | - |
| RGD1566386 | ENSRNOT00000028927 | 16,499,772 | INTRONIC              | C | T | - | - |
| RGD1566386 | ENSRNOT00000028927 | 16,500,875 | INTRONIC              | G | T | - | - |
| RGD1566386 | ENSRNOT00000028927 | 16,501,287 | INTRONIC              | A | G | - | - |
| RGD1566386 | ENSRNOT00000028927 | 16,501,608 | SYNONYMOUS_CODING     | T | C | - | - |
| RGD1566386 | ENSRNOT00000028927 | 16,501,713 | INTRONIC              | G | A | - | - |
| RGD1566386 | ENSRNOT00000028927 | 16,503,334 | INTRONIC              | C | T | - | - |
| RGD1566386 | ENSRNOT00000028927 | 16,504,090 | INTRONIC              | G | A | - | - |
| RGD1566386 | ENSRNOT00000028927 | 16,504,453 | INTRONIC              | T | A | - | - |
| RGD1566386 | ENSRNOT00000028927 | 16,505,478 | INTRONIC              | G | A | - | - |
| RGD1566386 | ENSRNOT00000028927 | 16,505,605 | INTRONIC              | G | C | - | - |
| RGD1566386 | ENSRNOT00000028927 | 16,505,891 | INTRONIC              | C | T | - | - |
| RGD1566386 | ENSRNOT00000028927 | 16,505,936 | INTRONIC              | T | G | - | - |
| RGD1566386 | ENSRNOT00000028927 | 16,506,523 | INTRONIC              | C | T | - | - |
| RGD1566386 | ENSRNOT00000028927 | 16,506,544 | INTRONIC              | C | T | - | - |
| RGD1566386 | ENSRNOT00000028927 | 16,506,629 | INTRONIC              | A | G | - | - |
| RGD1566386 | ENSRNOT00000028927 | 16,506,820 | INTRONIC              | C | T | - | - |
| RGD1566386 | ENSRNOT00000028927 | 16,506,862 | INTRONIC              | C | T | - | - |
| RGD1566386 | ENSRNOT00000028927 | 16,506,869 | INTRONIC              | G | C | - | - |
| RGD1566386 | ENSRNOT00000028927 | 16,506,927 | INTRONIC              | A | T | - | - |
| RGD1566386 | ENSRNOT00000028927 | 16,507,998 | INTRONIC              | T | C | - | - |
| RGD1566386 | ENSRNOT00000028927 | 16,508,578 | INTRONIC              | C | T | - | - |
| RGD1566386 | ENSRNOT00000028927 | 16,508,590 | INTRONIC              | C | G | - | - |
| RGD1566386 | ENSRNOT00000028927 | 16,508,600 | INTRONIC              | C | A | - | - |
| RGD1566386 | ENSRNOT00000028927 | 16,508,630 | INTRONIC              | C | T | - | - |
| RGD1566386 | ENSRNOT00000028927 | 16,508,672 | INTRONIC              | T | C | - | - |
| RGD1566386 | ENSRNOT00000028927 | 16,508,856 | INTRONIC              | A | G | - | - |
| RGD1566386 | ENSRNOT00000028927 | 16,508,935 | INTRONIC              | C | T | - | - |
| RGD1566386 | ENSRNOT00000028927 | 16,509,064 | INTRONIC              | C | T | - | - |
| RGD1566386 | ENSRNOT00000028927 | 16,509,259 | INTRONIC              | A | G | - | - |
| RGD1566386 | ENSRNOT00000028927 | 16,509,521 | INTRONIC              | G | T | - | - |
| RGD1566386 | ENSRNOT00000028927 | 16,509,649 | INTRONIC              | C | T | - | - |
| RGD1566386 | ENSRNOT00000028927 | 16,509,720 | INTRONIC              | T | C | - | - |
| RGD1566386 | ENSRNOT00000028927 | 16,509,803 | INTRONIC              | C | T | - | - |
| RGD1566386 | ENSRNOT00000028927 | 16,509,905 | INTRONIC              | T | C | - | - |
| RGD1566386 | ENSRNOT00000028927 | 16,510,064 | INTRONIC              | C | G | - | - |
| RGD1566386 | ENSRNOT00000028927 | 16,510,245 | INTRONIC              | A | G | - | - |
| RGD1566386 | ENSRNOT00000028927 | 16,510,398 | INTRONIC              | C | T | - | - |
| RGD1566386 | ENSRNOT00000028927 | 16,510,508 | INTRONIC              | T | C | - | - |
| RGD1566386 | ENSRNOT00000028927 | 16,510,725 | INTRONIC              | A | G | - | - |
| RGD1566386 | ENSRNOT00000028927 | 16,511,130 | INTRONIC              | G | C | - | - |
| RGD1566386 | ENSRNOT00000028927 | 16,511,216 | INTRONIC              | T | C | - | - |
| RGD1566386 | ENSRNOT00000028927 | 16,511,447 | INTRONIC              | A | G | - | - |
| RGD1566386 | ENSRNOT00000028927 | 16,511,550 | INTRONIC              | A | G | - | - |
| RGD1566386 | ENSRNOT00000028927 | 16,511,778 | INTRONIC              | A | T | C | - |
| RGD1566386 | ENSRNOT00000028927 | 16,512,093 | INTRONIC              | C | T | - | - |
| RGD1566386 | ENSRNOT00000028927 | 16,512,127 | INTRONIC              | T | C | - | - |
| RGD1566386 | ENSRNOT00000028927 | 16,512,138 | INTRONIC              | T | C | - | - |
| RGD1566386 | ENSRNOT00000028927 | 16,512,589 | INTRONIC              | A | G | - | - |
| RGD1566386 | ENSRNOT00000028927 | 16,513,034 | INTRONIC              | C | T | - | - |
| RGD1566386 | ENSRNOT00000028927 | 16,513,515 | INTRONIC              | C | G | - | - |
| RGD1566386 | ENSRNOT00000028927 | 16,513,755 | INTRONIC              | C | T | - | - |
| RGD1566386 | ENSRNOT00000028927 | 16,513,845 | INTRONIC              | G | T | - | - |
| RGD1566386 | ENSRNOT00000028927 | 16,514,072 | INTRONIC              | T | A | - | - |
| RGD1566386 | ENSRNOT00000028927 | 16,514,142 | INTRONIC              | A | G | - | - |

|            |                    |            |            |   |   |   |   |
|------------|--------------------|------------|------------|---|---|---|---|
| RGD1566386 | ENSRNOT00000028927 | 16,514,169 | INTRONIC   | A | G | - | - |
| RGD1566386 | ENSRNOT00000028927 | 16,514,172 | INTRONIC   | A | C | - | - |
| RGD1566386 | ENSRNOT00000028927 | 16,514,191 | INTRONIC   | C | T | - | - |
| RGD1566386 | ENSRNOT00000028927 | 16,514,390 | INTRONIC   | T | C | - | - |
| RGD1566386 | ENSRNOT00000028927 | 16,514,401 | INTRONIC   | A | C | - | - |
| RGD1566386 | ENSRNOT00000028927 | 16,514,658 | INTRONIC   | A | T | - | - |
| RGD1566386 | ENSRNOT00000028927 | 16,515,020 | INTRONIC   | G | A | - | - |
| RGD1566386 | ENSRNOT00000028927 | 16,515,918 | INTRONIC   | G | A | - | - |
| RGD1566386 | ENSRNOT00000028927 | 16,516,042 | INTRONIC   | A | G | - | - |
| RGD1566386 | ENSRNOT00000028927 | 16,516,558 | INTRONIC   | T | G | - | - |
| RGD1566386 | ENSRNOT00000028927 | 16,516,579 | INTRONIC   | G | A | - | - |
| RGD1566386 | ENSRNOT00000028927 | 16,516,604 | INTRONIC   | A | C | - | - |
| RGD1566386 | ENSRNOT00000028927 | 16,517,261 | INTRONIC   | C | T | - | - |
| RGD1566386 | ENSRNOT00000028927 | 16,518,165 | INTRONIC   | G | T | - | - |
| RGD1566386 | ENSRNOT00000028927 | 16,518,232 | INTRONIC   | G | A | - | - |
| RGD1566386 | ENSRNOT00000028927 | 16,518,519 | INTRONIC   | A | G | - | - |
| RGD1566386 | ENSRNOT00000028927 | 16,519,216 | INTRONIC   | T | C | - | - |
| RGD1566386 | ENSRNOT00000028927 | 16,519,300 | INTRONIC   | G | A | - | - |
| RGD1566386 | ENSRNOT00000028927 | 16,519,359 | INTRONIC   | T | C | - | - |
| RGD1566386 | ENSRNOT00000028927 | 16,519,386 | INTRONIC   | A | G | - | - |
| RGD1566386 | ENSRNOT00000028927 | 16,519,396 | INTRONIC   | G | A | - | - |
| RGD1566386 | ENSRNOT00000028927 | 16,519,422 | INTRONIC   | G | A | - | - |
| RGD1566386 | ENSRNOT00000028927 | 16,519,605 | INTRONIC   | G | A | - | - |
| RGD1566386 | ENSRNOT00000028927 | 16,519,718 | INTRONIC   | C | T | - | - |
| RGD1566386 | ENSRNOT00000028927 | 16,519,898 | INTRONIC   | A | G | - | - |
| RGD1566386 | ENSRNOT00000028927 | 16,519,926 | INTRONIC   | G | A | - | - |
| RGD1566386 | ENSRNOT00000028927 | 16,520,295 | INTRONIC   | G | A | - | - |
| RGD1566386 | ENSRNOT00000028927 | 16,520,347 | INTRONIC   | T | C | - | - |
| RGD1566386 | ENSRNOT00000028927 | 16,520,352 | INTRONIC   | C | T | - | - |
| RGD1566386 | ENSRNOT00000028927 | 16,520,369 | INTRONIC   | A | G | - | - |
| RGD1566386 | ENSRNOT00000028927 | 16,520,449 | INTRONIC   | C | T | - | - |
| RGD1566386 | ENSRNOT00000028927 | 16,520,462 | INTRONIC   | A | G | - | - |
| RGD1566386 | ENSRNOT00000028927 | 16,520,550 | INTRONIC   | A | G | - | - |
| RGD1566386 | ENSRNOT00000028927 | 16,520,552 | INTRONIC   | A | G | - | - |
| RGD1566386 | ENSRNOT00000028927 | 16,520,594 | INTRONIC   | A | T | - | - |
| RGD1566386 | ENSRNOT00000028927 | 16,520,659 | INTRONIC   | T | C | - | - |
| RGD1566386 | ENSRNOT00000028927 | 16,521,115 | INTRONIC   | C | T | - | - |
| RGD1566386 | ENSRNOT00000028927 | 16,521,244 | 5PRIME_UTR | C | T | - | - |
| RGD1566386 | ENSRNOT00000028927 | 16,521,349 | UPSTREAM   | A | G | - | - |
| RGD1566386 | ENSRNOT00000028927 | 16,521,358 | UPSTREAM   | T | C | - | - |
| RGD1566386 | ENSRNOT00000028927 | 16,521,789 | UPSTREAM   | C | T | - | - |
| RGD1566386 | ENSRNOT00000028927 | 16,522,316 | UPSTREAM   | A | T | - | - |
| RGD1566386 | ENSRNOT00000028927 | 16,523,897 | UPSTREAM   | C | G | - | - |
| RGD1566386 | ENSRNOT00000028927 | 16,524,777 | UPSTREAM   | A | T | - | - |
| RGD1566386 | ENSRNOT00000028927 | 16,524,778 | UPSTREAM   | T | C | - | - |
| RGD1566386 | ENSRNOT00000028927 | 16,525,278 | UPSTREAM   | G | A | - | - |
| RGD1566386 | ENSRNOT00000028927 | 16,525,520 | UPSTREAM   | G | A | - | - |
| RGD1566386 | ENSRNOT00000028927 | 16,525,528 | UPSTREAM   | G | A | - | - |
| RGD1566386 | ENSRNOT00000028927 | 16,525,812 | UPSTREAM   | C | T | - | - |
| RGD1566386 | ENSRNOT00000028927 | 16,525,825 | UPSTREAM   | A | G | - | - |
| RGD1566386 | ENSRNOT00000028927 | 16,525,870 | UPSTREAM   | T | C | - | - |
| RGD1566386 | ENSRNOT00000028927 | 16,525,919 | UPSTREAM   | A | G | - | - |
| RGD1566386 | ENSRNOT00000028927 | 16,526,030 | UPSTREAM   | G | A | - | - |
| -          | -                  | 16,526,404 | INTERGENIC | G | A | - | - |
| -          | -                  | 16,526,732 | INTERGENIC | C | T | - | - |
| -          | -                  | 16,526,805 | INTERGENIC | A | T | - | - |
| -          | -                  | 16,526,812 | INTERGENIC | C | T | - | - |
| -          | -                  | 16,526,849 | INTERGENIC | G | T | - | - |
| -          | -                  | 16,526,981 | INTERGENIC | C | G | - | - |
| -          | -                  | 16,526,988 | INTERGENIC | G | A | - | - |
| -          | -                  | 16,527,012 | INTERGENIC | T | G | - | - |
| -          | -                  | 16,527,050 | INTERGENIC | G | A | - | - |
| -          | -                  | 16,527,109 | INTERGENIC | T | C | - | - |
| -          | -                  | 16,527,136 | INTERGENIC | C | A | - | - |
| -          | -                  | 16,527,210 | INTERGENIC | G | A | - | - |
| -          | -                  | 16,527,240 | INTERGENIC | G | A | - | - |
| -          | -                  | 16,527,286 | INTERGENIC | G | C | - | - |
| -          | -                  | 16,527,318 | INTERGENIC | G | A | - | - |
| -          | -                  | 16,527,361 | INTERGENIC | T | A | - | - |
| -          | -                  | 16,527,373 | INTERGENIC | C | T | - | - |
| -          | -                  | 16,527,381 | INTERGENIC | T | C | - | - |
| -          | -                  | 16,527,463 | INTERGENIC | C | A | - | - |
| -          | -                  | 16,527,496 | INTERGENIC | G | A | - | - |
| -          | -                  | 16,527,530 | INTERGENIC | C | T | - | - |
| -          | -                  | 16,527,580 | INTERGENIC | A | G | - | - |
| -          | -                  | 16,527,584 | INTERGENIC | G | A | - | - |
| -          | -                  | 16,527,604 | INTERGENIC | C | A | - | - |
| -          | -                  | 16,527,628 | INTERGENIC | C | A | - | - |
| -          | -                  | 16,527,644 | INTERGENIC | G | A | - | - |
| -          | -                  | 16,527,669 | INTERGENIC | C | T | - | - |

|       |                    |            |                       |   |   |   |   |
|-------|--------------------|------------|-----------------------|---|---|---|---|
| -     | -                  | 16,527,732 | INTERGENIC            | C | T | - | - |
| -     | -                  | 16,527,897 | INTERGENIC            | A | G | - | - |
| -     | -                  | 16,528,069 | INTERGENIC            | G | A | - | - |
| -     | -                  | 16,528,157 | INTERGENIC            | G | C | - | - |
| -     | -                  | 16,528,164 | INTERGENIC            | T | C | - | - |
| -     | -                  | 16,528,187 | INTERGENIC            | G | A | - | - |
| -     | -                  | 16,528,329 | INTERGENIC            | A | G | - | - |
| -     | -                  | 16,528,367 | INTERGENIC            | T | C | - | - |
| -     | -                  | 16,528,513 | INTERGENIC            | A | C | - | - |
| -     | -                  | 16,528,552 | INTERGENIC            | A | G | - | - |
| -     | -                  | 16,528,559 | INTERGENIC            | G | A | - | - |
| -     | -                  | 16,528,576 | INTERGENIC            | A | G | - | - |
| -     | -                  | 16,528,811 | INTERGENIC            | C | T | - | - |
| -     | -                  | 16,528,816 | INTERGENIC            | G | A | - | - |
| -     | -                  | 16,528,878 | INTERGENIC            | G | C | - | - |
| -     | -                  | 16,528,903 | INTERGENIC            | G | T | - | - |
| -     | -                  | 16,528,945 | INTERGENIC            | C | A | - | - |
| -     | -                  | 16,529,205 | INTERGENIC            | A | G | - | - |
| -     | -                  | 16,529,246 | INTERGENIC            | C | T | - | - |
| -     | -                  | 16,529,268 | INTERGENIC            | A | T | - | - |
| -     | -                  | 16,529,501 | INTERGENIC            | C | T | - | - |
| -     | -                  | 16,529,527 | INTERGENIC            | T | C | - | - |
| -     | -                  | 16,529,549 | INTERGENIC            | C | T | - | - |
| -     | -                  | 16,529,604 | INTERGENIC            | T | G | - | - |
| -     | -                  | 16,529,646 | INTERGENIC            | A | G | - | - |
| -     | -                  | 16,529,787 | INTERGENIC            | G | A | - | - |
| -     | -                  | 16,530,140 | INTERGENIC            | C | T | - | - |
| -     | -                  | 16,530,201 | INTERGENIC            | C | A | - | - |
| -     | -                  | 16,530,260 | INTERGENIC            | G | A | - | - |
| -     | -                  | 16,530,353 | INTERGENIC            | G | T | - | - |
| -     | -                  | 16,530,410 | INTERGENIC            | T | C | - | - |
| -     | -                  | 16,530,416 | INTERGENIC            | C | T | - | - |
| -     | -                  | 16,530,520 | INTERGENIC            | A | G | - | - |
| -     | -                  | 16,530,842 | INTERGENIC            | T | C | - | - |
| -     | -                  | 16,530,975 | INTERGENIC            | T | C | - | - |
| -     | -                  | 16,531,166 | INTERGENIC            | C | T | - | - |
| -     | -                  | 16,531,167 | INTERGENIC            | A | G | - | - |
| -     | -                  | 16,531,264 | INTERGENIC            | C | T | - | - |
| -     | -                  | 16,531,278 | INTERGENIC            | T | G | - | - |
| -     | -                  | 16,531,295 | INTERGENIC            | A | G | - | - |
| -     | -                  | 16,531,318 | INTERGENIC            | G | A | - | - |
| -     | -                  | 16,531,363 | INTERGENIC            | C | T | - | - |
| -     | -                  | 16,531,539 | INTERGENIC            | C | T | - | - |
| -     | -                  | 16,531,656 | INTERGENIC            | C | G | - | - |
| -     | -                  | 16,531,760 | INTERGENIC            | C | A | - | - |
| -     | -                  | 16,531,805 | INTERGENIC            | G | A | - | - |
| -     | -                  | 16,532,040 | INTERGENIC            | G | A | - | - |
| -     | -                  | 16,532,096 | INTERGENIC            | C | G | - | - |
| -     | -                  | 16,532,121 | INTERGENIC            | G | A | - | - |
| -     | -                  | 16,532,151 | INTERGENIC            | T | C | - | - |
| -     | -                  | 16,532,433 | INTERGENIC            | C | T | - | - |
| -     | -                  | 16,532,802 | INTERGENIC            | G | C | - | - |
| Zfp68 | ENSRNOT00000001784 | 16,533,053 | UPSTREAM              | T | C | - | - |
| Zfp68 | ENSRNOT00000001784 | 16,533,091 | UPSTREAM              | G | T | - | - |
| Zfp68 | ENSRNOT00000001784 | 16,533,093 | UPSTREAM              | T | C | - | - |
| Zfp68 | ENSRNOT00000001784 | 16,533,226 | UPSTREAM              | G | C | - | - |
| Zfp68 | ENSRNOT00000001784 | 16,533,286 | UPSTREAM              | T | C | - | - |
| Zfp68 | ENSRNOT00000001784 | 16,533,290 | UPSTREAM              | T | G | - | - |
| Zfp68 | ENSRNOT00000001784 | 16,533,365 | UPSTREAM              | T | C | - | - |
| Zfp68 | ENSRNOT00000001784 | 16,533,447 | UPSTREAM              | T | A | - | - |
| Zfp68 | ENSRNOT00000001784 | 16,533,561 | UPSTREAM              | A | C | - | - |
| Zfp68 | ENSRNOT00000001784 | 16,533,933 | UPSTREAM              | A | C | - | - |
| Zfp68 | ENSRNOT00000001784 | 16,534,374 | UPSTREAM              | T | G | - | - |
| Zfp68 | ENSRNOT00000001784 | 16,534,695 | UPSTREAM              | G | C | - | - |
| Zfp68 | ENSRNOT00000001784 | 16,535,473 | UPSTREAM              | T | A | - | - |
| Zfp68 | ENSRNOT00000001784 | 16,535,475 | UPSTREAM              | T | A | - | - |
| Zfp68 | ENSRNOT00000001784 | 16,538,677 | INTRONIC              | C | A | - | - |
| Zfp68 | ENSRNOT00000001784 | 16,542,091 | INTRONIC              | G | A | - | - |
| Zfp68 | ENSRNOT00000001784 | 16,543,215 | INTRONIC              | C | T | - | - |
| Zfp68 | ENSRNOT00000001784 | 16,543,765 | INTRONIC              | T | C | - | - |
| Zfp68 | ENSRNOT00000001784 | 16,545,198 | INTRONIC              | T | G | - | - |
| Zfp68 | ENSRNOT00000001784 | 16,545,529 | NON_SYNONYMOUS_CODING | C | T | L | F |
| Zfp68 | ENSRNOT00000001784 | 16,545,597 | SYNONYMOUS_CODING     | A | G | - | - |
| Zfp68 | ENSRNOT00000001784 | 16,546,695 | SYNONYMOUS_CODING     | T | A | - | - |
| Zfp68 | ENSRNOT00000001784 | 16,546,914 | 3PRIME_UTR            | C | A | - | - |
| Zfp68 | ENSRNOT00000001784 | 16,547,567 | 3PRIME_UTR            | G | T | - | - |
| Zfp68 | ENSRNOT00000001784 | 16,548,435 | 3PRIME_UTR            | G | C | - | - |
| Zfp68 | ENSRNOT00000001784 | 16,548,458 | 3PRIME_UTR            | C | G | - | - |
| Zfp68 | ENSRNOT00000001784 | 16,548,572 | 3PRIME_UTR            | G | A | - | - |
| Zfp68 | ENSRNOT00000001784 | 16,550,252 | DOWNSTREAM            | G | T | - | - |

|            |                    |            |                       |   |   |   |   |
|------------|--------------------|------------|-----------------------|---|---|---|---|
| Zfp68      | ENSRNOT00000001784 | 16,550,360 | DOWNSTREAM            | C | A | - | - |
| Zfp68      | ENSRNOT00000001784 | 16,551,137 | DOWNSTREAM            | C | T | - | - |
| Zfp68      | ENSRNOT00000001784 | 16,551,140 | DOWNSTREAM            | C | T | - | - |
| Zfp68      | ENSRNOT00000001784 | 16,551,652 | DOWNSTREAM            | C | A | - | - |
| Zfp68      | ENSRNOT00000001784 | 16,551,690 | DOWNSTREAM            | G | A | - | - |
| Zfp68      | ENSRNOT00000001784 | 16,552,198 | DOWNSTREAM            | G | A | - | - |
| Zfp68      | ENSRNOT00000001784 | 16,552,475 | DOWNSTREAM            | G | T | - | - |
| Zfp68      | ENSRNOT00000001784 | 16,552,719 | DOWNSTREAM            | G | A | - | - |
| Zfp68      | ENSRNOT00000001784 | 16,553,043 | DOWNSTREAM            | T | C | - | - |
| Zfp68      | ENSRNOT00000001784 | 16,553,453 | DOWNSTREAM            | C | T | - | - |
| Zfp68      | ENSRNOT00000001784 | 16,554,305 | DOWNSTREAM            | T | C | - | - |
| D3ZT31_RAT | ENSRNOT00000001785 | 16,555,295 | DOWNSTREAM            | A | G | - | - |
| D3ZT31_RAT | ENSRNOT00000001785 | 16,555,506 | DOWNSTREAM            | C | T | - | - |
| D3ZT31_RAT | ENSRNOT00000001785 | 16,555,585 | DOWNSTREAM            | T | A | - | - |
| D3ZT31_RAT | ENSRNOT00000001785 | 16,555,586 | DOWNSTREAM            | C | T | - | - |
| D3ZT31_RAT | ENSRNOT00000001785 | 16,556,053 | DOWNSTREAM            | G | T | - | - |
| D3ZT31_RAT | ENSRNOT00000001785 | 16,556,402 | DOWNSTREAM            | A | C | - | - |
| D3ZT31_RAT | ENSRNOT00000001785 | 16,556,754 | CODING_UNKNOWN        | A | T | - | - |
| D3ZT31_RAT | ENSRNOT00000001785 | 16,557,001 | NON_SYNONYMOUS_CODING | C | T | A | T |
| D3ZT31_RAT | ENSRNOT00000001785 | 16,557,926 | UPSTREAM              | C | T | - | - |
| D3ZT31_RAT | ENSRNOT00000001785 | 16,557,948 | UPSTREAM              | T | C | - | - |
| D3ZT31_RAT | ENSRNOT00000001785 | 16,561,811 | UPSTREAM              | A | T | - | - |
| D3ZT31_RAT | ENSRNOT00000001785 | 16,561,951 | UPSTREAM              | T | A | - | - |
| -          | -                  | 16,562,218 | INTERGENIC            | T | C | - | - |
| -          | -                  | 16,562,315 | INTERGENIC            | G | C | - | - |
| -          | -                  | 16,564,141 | INTERGENIC            | A | C | - | - |
| -          | -                  | 16,565,802 | INTERGENIC            | A | G | - | - |
| -          | -                  | 16,566,076 | INTERGENIC            | T | C | - | - |
| -          | -                  | 16,566,131 | INTERGENIC            | T | A | - | - |
| -          | -                  | 16,566,683 | INTERGENIC            | T | A | - | - |
| F1LVB7_RAT | ENSRNOT00000036877 | 16,567,385 | UPSTREAM              | T | G | - | - |
| F1LVB7_RAT | ENSRNOT00000036877 | 16,567,821 | UPSTREAM              | C | A | - | - |
| F1LVB7_RAT | ENSRNOT00000036877 | 16,567,996 | UPSTREAM              | C | T | - | - |
| F1LVB7_RAT | ENSRNOT00000036877 | 16,568,317 | UPSTREAM              | A | C | - | - |
| F1LVB7_RAT | ENSRNOT00000036877 | 16,569,150 | UPSTREAM              | C | T | - | - |
| F1LVB7_RAT | ENSRNOT00000036877 | 16,569,748 | UPSTREAM              | A | G | - | - |
| F1LVB7_RAT | ENSRNOT00000036877 | 16,570,123 | UPSTREAM              | C | T | - | - |
| F1LVB7_RAT | ENSRNOT00000036877 | 16,570,220 | UPSTREAM              | C | T | - | - |
| F1LVB7_RAT | ENSRNOT00000036877 | 16,570,372 | UPSTREAM              | G | A | - | - |
| F1LVB7_RAT | ENSRNOT00000036877 | 16,570,401 | UPSTREAM              | G | A | - | - |
| F1LVB7_RAT | ENSRNOT00000036877 | 16,570,623 | UPSTREAM              | T | G | - | - |
| F1LVB7_RAT | ENSRNOT00000036877 | 16,570,636 | UPSTREAM              | T | G | - | - |
| F1LVB7_RAT | ENSRNOT00000036877 | 16,570,650 | UPSTREAM              | C | T | - | - |
| F1LVB7_RAT | ENSRNOT00000036877 | 16,570,854 | UPSTREAM              | T | C | - | - |
| F1LVB7_RAT | ENSRNOT00000036877 | 16,570,864 | UPSTREAM              | C | T | - | - |
| F1LVB7_RAT | ENSRNOT00000036877 | 16,570,900 | UPSTREAM              | G | A | - | - |
| F1LVB7_RAT | ENSRNOT00000036877 | 16,570,959 | UPSTREAM              | G | A | - | - |
| F1LVB7_RAT | ENSRNOT00000036877 | 16,571,352 | UPSTREAM              | C | T | - | - |
| F1LVB7_RAT | ENSRNOT00000036877 | 16,571,411 | UPSTREAM              | T | A | - | - |
| F1LVB7_RAT | ENSRNOT00000036877 | 16,571,573 | UPSTREAM              | C | T | - | - |
| F1LVB7_RAT | ENSRNOT00000036877 | 16,571,625 | UPSTREAM              | G | A | - | - |
| F1LVB7_RAT | ENSRNOT00000036877 | 16,571,632 | UPSTREAM              | G | A | - | - |
| F1LVB7_RAT | ENSRNOT00000036877 | 16,571,702 | UPSTREAM              | A | G | - | - |
| F1LVB7_RAT | ENSRNOT00000036877 | 16,572,101 | UPSTREAM              | A | T | - | - |
| F1LVB7_RAT | ENSRNOT00000036877 | 16,572,113 | UPSTREAM              | A | T | - | - |
| F1LVB7_RAT | ENSRNOT00000036877 | 16,572,716 | INTRONIC              | C | A | - | - |
| F1LVB7_RAT | ENSRNOT00000036877 | 16,572,976 | INTRONIC              | A | G | - | - |
| F1LVB7_RAT | ENSRNOT00000036877 | 16,573,536 | NON_SYNONYMOUS_CODING | T | C | L | P |
| F1LVB7_RAT | ENSRNOT00000036877 | 16,573,619 | INTRONIC              | A | C | - | - |
| F1LVB7_RAT | ENSRNOT00000036877 | 16,573,682 | INTRONIC              | A | T | - | - |
| F1LVB7_RAT | ENSRNOT00000036877 | 16,573,788 | NON_SYNONYMOUS_CODING | G | A | G | S |
| F1LVB7_RAT | ENSRNOT00000036877 | 16,574,027 | INTRONIC              | T | C | - | - |
| F1LVB7_RAT | ENSRNOT00000036877 | 16,574,285 | INTRONIC              | A | G | - | - |
| F1LVB7_RAT | ENSRNOT00000036877 | 16,575,309 | DOWNSTREAM            | C | T | - | - |
| F1LVB7_RAT | ENSRNOT00000036877 | 16,576,173 | DOWNSTREAM            | T | C | - | - |
| F1LVB7_RAT | ENSRNOT00000036877 | 16,576,820 | DOWNSTREAM            | T | C | - | - |
| F1LVB7_RAT | ENSRNOT00000036877 | 16,576,982 | DOWNSTREAM            | G | A | - | - |
| F1LVB7_RAT | ENSRNOT00000036877 | 16,577,088 | DOWNSTREAM            | G | A | - | - |
| F1LVB7_RAT | ENSRNOT00000036877 | 16,578,400 | DOWNSTREAM            | T | C | - | - |
| F1LVB7_RAT | ENSRNOT00000036877 | 16,578,449 | DOWNSTREAM            | A | G | - | - |
| F1LVB7_RAT | ENSRNOT00000036877 | 16,578,465 | DOWNSTREAM            | T | G | - | - |
| F1LVB7_RAT | ENSRNOT00000036877 | 16,578,467 | DOWNSTREAM            | G | T | - | - |
| F1LVB7_RAT | ENSRNOT00000036877 | 16,578,607 | DOWNSTREAM            | A | G | - | - |
| -          | -                  | 16,580,603 | INTERGENIC            | T | C | - | - |
| -          | -                  | 16,580,616 | INTERGENIC            | G | C | - | - |
| -          | -                  | 16,580,715 | INTERGENIC            | T | C | - | - |
| -          | -                  | 16,581,770 | INTERGENIC            | C | T | - | - |
| -          | -                  | 16,582,378 | INTERGENIC            | A | G | - | - |
| -          | -                  | 16,582,653 | INTERGENIC            | T | C | - | - |
| -          | -                  | 16,582,894 | INTERGENIC            | A | G | - | - |

|   |            |            |   |   |   |   |
|---|------------|------------|---|---|---|---|
| - | 16,584,388 | INTERGENIC | C | T | - | - |
| - | 16,584,861 | INTERGENIC | A | G | - | - |
| - | 16,584,941 | INTERGENIC | A | C | - | - |
| - | 16,584,942 | INTERGENIC | T | C | - | - |
| - | 16,585,557 | INTERGENIC | C | T | - | - |
| - | 16,585,965 | INTERGENIC | T | A | - | - |
| - | 16,586,255 | INTERGENIC | G | A | - | - |
| - | 16,586,548 | INTERGENIC | C | T | - | - |
| - | 16,586,669 | INTERGENIC | T | C | - | - |
| - | 16,586,726 | INTERGENIC | A | G | - | - |
| - | 16,586,985 | INTERGENIC | T | G | - | - |
| - | 16,587,027 | INTERGENIC | T | C | - | - |
| - | 16,587,177 | INTERGENIC | T | C | - | - |
| - | 16,587,408 | INTERGENIC | T | A | - | - |
| - | 16,587,647 | INTERGENIC | T | A | - | - |
| - | 16,587,815 | INTERGENIC | T | C | - | - |
| - | 16,587,894 | INTERGENIC | C | T | - | - |
| - | 16,587,916 | INTERGENIC | A | C | - | - |
| - | 16,588,011 | INTERGENIC | G | A | - | - |
| - | 16,588,160 | INTERGENIC | C | T | - | - |
| - | 16,588,291 | INTERGENIC | C | A | - | - |
| - | 16,588,584 | INTERGENIC | C | T | - | - |
| - | 16,588,811 | INTERGENIC | A | G | - | - |
| - | 16,589,428 | INTERGENIC | A | T | - | - |
| - | 16,589,778 | INTERGENIC | T | G | - | - |
| - | 16,589,982 | INTERGENIC | G | A | - | - |
| - | 16,590,211 | INTERGENIC | G | A | - | - |
| - | 16,590,305 | INTERGENIC | T | C | - | - |
| - | 16,590,476 | INTERGENIC | T | C | - | - |
| - | 16,590,609 | INTERGENIC | A | G | - | - |
| - | 16,591,121 | INTERGENIC | C | T | - | - |
| - | 16,591,138 | INTERGENIC | T | C | - | - |
| - | 16,591,227 | INTERGENIC | A | T | - | - |
| - | 16,591,304 | INTERGENIC | C | A | - | - |
| - | 16,591,379 | INTERGENIC | C | T | - | - |
| - | 16,591,466 | INTERGENIC | A | G | - | - |
| - | 16,591,498 | INTERGENIC | T | C | - | - |
| - | 16,592,142 | INTERGENIC | C | A | - | - |
| - | 16,592,178 | INTERGENIC | A | G | - | - |
| - | 16,592,245 | INTERGENIC | A | T | - | - |
| - | 16,592,317 | INTERGENIC | T | C | - | - |
| - | 16,592,501 | INTERGENIC | A | T | - | - |
| - | 16,592,798 | INTERGENIC | C | T | - | - |
| - | 16,592,908 | INTERGENIC | T | C | - | - |
| - | 16,593,768 | INTERGENIC | A | G | - | - |
| - | 16,594,145 | INTERGENIC | T | C | - | - |
| - | 16,594,525 | INTERGENIC | C | T | - | - |
| - | 16,594,893 | INTERGENIC | C | T | - | - |
| - | 16,594,896 | INTERGENIC | C | G | - | - |
| - | 16,594,909 | INTERGENIC | A | G | - | - |
| - | 16,594,921 | INTERGENIC | T | A | - | - |
| - | 16,595,006 | INTERGENIC | C | G | - | - |
| - | 16,595,173 | INTERGENIC | A | C | - | - |
| - | 16,595,198 | INTERGENIC | T | C | - | - |
| - | 16,595,210 | INTERGENIC | T | A | - | - |
| - | 16,595,437 | INTERGENIC | T | C | - | - |
| - | 16,595,584 | INTERGENIC | C | T | - | - |
| - | 16,595,927 | INTERGENIC | G | A | - | - |
| - | 16,596,025 | INTERGENIC | T | G | - | - |
| - | 16,596,848 | INTERGENIC | G | A | - | - |
| - | 16,596,852 | INTERGENIC | T | C | - | - |
| - | 16,598,262 | INTERGENIC | T | G | - | - |
| - | 16,598,272 | INTERGENIC | T | C | - | - |
| - | 16,598,422 | INTERGENIC | T | G | - | - |
| - | 16,599,450 | INTERGENIC | A | G | - | - |
| - | 16,601,032 | INTERGENIC | A | G | - | - |
| - | 16,602,355 | INTERGENIC | G | C | - | - |
| - | 16,602,647 | INTERGENIC | T | G | - | - |
| - | 16,603,461 | INTERGENIC | G | A | - | - |
| - | 16,604,201 | INTERGENIC | A | T | - | - |
| - | 16,604,305 | INTERGENIC | T | C | - | - |
| - | 16,605,404 | INTERGENIC | C | G | - | - |
| - | 16,605,662 | INTERGENIC | A | G | - | - |
| - | 16,605,669 | INTERGENIC | T | A | - | - |
| - | 16,606,069 | INTERGENIC | C | T | - | - |
| - | 16,606,201 | INTERGENIC | G | A | - | - |
| - | 16,607,323 | INTERGENIC | A | G | - | - |
| - | 16,607,608 | INTERGENIC | C | T | - | - |
| - | 16,607,989 | INTERGENIC | C | T | - | - |
| - | 16,608,063 | INTERGENIC | C | G | - | - |

|           |                    |            |            |   |   |   |   |
|-----------|--------------------|------------|------------|---|---|---|---|
| -         | -                  | 16,608,180 | INTERGENIC | C | T | - | - |
| -         | -                  | 16,608,475 | INTERGENIC | T | C | - | - |
| -         | -                  | 16,608,651 | INTERGENIC | C | T | - | - |
| -         | -                  | 16,610,031 | INTERGENIC | G | A | - | - |
| -         | -                  | 16,610,984 | INTERGENIC | A | G | - | - |
| -         | -                  | 16,611,991 | INTERGENIC | A | T | - | - |
| -         | -                  | 16,611,278 | INTERGENIC | C | A | - | - |
| -         | -                  | 16,612,192 | INTERGENIC | G | C | - | - |
| -         | -                  | 16,612,776 | INTERGENIC | C | G | - | - |
| -         | -                  | 16,613,093 | INTERGENIC | A | C | - | - |
| -         | -                  | 16,614,154 | INTERGENIC | A | G | - | - |
| -         | -                  | 16,614,292 | INTERGENIC | T | C | - | - |
| -         | -                  | 16,614,599 | INTERGENIC | A | C | - | - |
| -         | -                  | 16,614,643 | INTERGENIC | T | C | - | - |
| -         | -                  | 16,614,812 | INTERGENIC | T | C | - | - |
| -         | -                  | 16,615,435 | INTERGENIC | C | T | - | - |
| -         | -                  | 16,616,052 | INTERGENIC | A | G | - | - |
| -         | -                  | 16,616,652 | INTERGENIC | C | G | - | - |
| -         | -                  | 16,616,991 | INTERGENIC | A | C | - | - |
| -         | -                  | 16,617,010 | INTERGENIC | A | C | - | - |
| -         | -                  | 16,617,640 | INTERGENIC | A | T | - | - |
| -         | -                  | 16,618,286 | INTERGENIC | A | C | - | - |
| -         | -                  | 16,618,358 | INTERGENIC | T | C | - | - |
| -         | -                  | 16,618,603 | INTERGENIC | T | C | - | - |
| -         | -                  | 16,618,745 | INTERGENIC | A | C | - | - |
| -         | -                  | 16,619,100 | INTERGENIC | T | C | - | - |
| -         | -                  | 16,619,995 | INTERGENIC | A | T | - | - |
| -         | -                  | 16,620,105 | INTERGENIC | A | G | - | - |
| -         | -                  | 16,620,324 | INTERGENIC | G | A | - | - |
| -         | -                  | 16,621,429 | INTERGENIC | C | T | - | - |
| -         | -                  | 16,621,505 | INTERGENIC | T | A | - | - |
| -         | -                  | 16,621,707 | INTERGENIC | C | A | - | - |
| -         | -                  | 16,621,773 | INTERGENIC | C | G | - | - |
| -         | -                  | 16,621,847 | INTERGENIC | G | A | - | - |
| -         | -                  | 16,621,887 | INTERGENIC | G | A | - | - |
| -         | -                  | 16,621,984 | INTERGENIC | A | T | - | - |
| -         | -                  | 16,622,050 | INTERGENIC | A | G | - | - |
| -         | -                  | 16,622,099 | INTERGENIC | G | A | - | - |
| -         | -                  | 16,622,102 | INTERGENIC | A | G | - | - |
| -         | -                  | 16,622,205 | INTERGENIC | G | A | - | - |
| -         | -                  | 16,622,275 | INTERGENIC | C | A | - | - |
| -         | -                  | 16,622,388 | INTERGENIC | C | T | - | - |
| -         | -                  | 16,622,713 | INTERGENIC | T | G | - | - |
| -         | -                  | 16,622,751 | INTERGENIC | G | T | - | - |
| -         | -                  | 16,622,752 | INTERGENIC | A | T | - | - |
| -         | -                  | 16,622,837 | INTERGENIC | A | T | - | - |
| -         | -                  | 16,622,921 | INTERGENIC | C | G | - | - |
| -         | -                  | 16,623,027 | INTERGENIC | G | C | - | - |
| -         | -                  | 16,623,317 | INTERGENIC | G | C | - | - |
| -         | -                  | 16,623,376 | INTERGENIC | G | T | - | - |
| -         | -                  | 16,623,469 | INTERGENIC | C | G | - | - |
| -         | -                  | 16,623,962 | INTERGENIC | G | C | - | - |
| -         | -                  | 16,623,966 | INTERGENIC | A | G | - | - |
| -         | -                  | 16,624,018 | INTERGENIC | G | A | - | - |
| -         | -                  | 16,624,086 | INTERGENIC | A | G | - | - |
| -         | -                  | 16,624,303 | INTERGENIC | C | T | - | - |
| -         | -                  | 16,624,378 | INTERGENIC | G | C | - | - |
| -         | -                  | 16,624,607 | INTERGENIC | A | T | - | - |
| -         | -                  | 16,624,989 | INTERGENIC | A | C | - | - |
| -         | -                  | 16,625,078 | INTERGENIC | T | A | - | - |
| -         | -                  | 16,625,156 | INTERGENIC | G | A | - | - |
| -         | -                  | 16,625,268 | INTERGENIC | G | T | - | - |
| -         | -                  | 16,625,503 | INTERGENIC | C | A | - | - |
| -         | -                  | 16,625,615 | INTERGENIC | T | C | - | - |
| -         | -                  | 16,625,695 | INTERGENIC | C | G | - | - |
| -         | -                  | 16,625,826 | INTERGENIC | A | T | - | - |
| -         | -                  | 16,625,831 | INTERGENIC | C | G | - | - |
| -         | -                  | 16,625,896 | INTERGENIC | C | A | - | - |
| -         | -                  | 16,625,898 | INTERGENIC | C | T | - | - |
| -         | -                  | 16,625,968 | INTERGENIC | C | T | - | - |
| -         | -                  | 16,626,114 | INTERGENIC | C | T | - | - |
| MGC112692 | ENSRNOT00000060155 | 16,630,326 | DOWNSTREAM | A | G | - | - |
| MGC112692 | ENSRNOT00000060155 | 16,630,583 | DOWNSTREAM | T | C | - | - |
| MGC112692 | ENSRNOT00000060155 | 16,630,659 | DOWNSTREAM | T | G | - | - |
| MGC112692 | ENSRNOT00000060155 | 16,630,769 | DOWNSTREAM | T | C | - | - |
| MGC112692 | ENSRNOT00000060155 | 16,631,095 | DOWNSTREAM | T | G | - | - |
| MGC112692 | ENSRNOT00000060155 | 16,631,102 | DOWNSTREAM | A | C | - | - |
| MGC112692 | ENSRNOT00000060155 | 16,631,574 | DOWNSTREAM | T | C | - | - |
| MGC112692 | ENSRNOT00000060155 | 16,631,915 | DOWNSTREAM | C | G | - | - |
| MGC112692 | ENSRNOT00000060155 | 16,631,924 | DOWNSTREAM | A | T | - | - |



|           |                   |            |                       |   |   |   |   |
|-----------|-------------------|------------|-----------------------|---|---|---|---|
| MGC112692 | ENSRNOT0000060155 | 16,632,118 | DOWNSTREAM            | A | G | - | - |
| MGC112692 | ENSRNOT0000060155 | 16,632,141 | DOWNSTREAM            | G | A | - | - |
| MGC112692 | ENSRNOT0000060155 | 16,632,167 | DOWNSTREAM            | G | A | - | - |
| MGC112692 | ENSRNOT0000060155 | 16,632,359 | DOWNSTREAM            | C | G | - | - |
| MGC112692 | ENSRNOT0000060155 | 16,632,424 | DOWNSTREAM            | C | T | - | - |
| MGC112692 | ENSRNOT0000060155 | 16,632,481 | DOWNSTREAM            | T | C | - | - |
| MGC112692 | ENSRNOT0000060155 | 16,632,498 | DOWNSTREAM            | A | T | - | - |
| MGC112692 | ENSRNOT0000060155 | 16,632,533 | DOWNSTREAM            | G | T | - | - |
| MGC112692 | ENSRNOT0000060155 | 16,633,237 | DOWNSTREAM            | A | T | - | - |
| MGC112692 | ENSRNOT0000060155 | 16,633,744 | DOWNSTREAM            | T | C | - | - |
| MGC112692 | ENSRNOT0000060155 | 16,633,785 | DOWNSTREAM            | T | C | - | - |
| MGC112692 | ENSRNOT0000060155 | 16,634,012 | DOWNSTREAM            | T | A | - | - |
| MGC112692 | ENSRNOT0000060155 | 16,634,037 | DOWNSTREAM            | G | T | - | - |
| MGC112692 | ENSRNOT0000060155 | 16,634,178 | DOWNSTREAM            | C | A | - | - |
| MGC112692 | ENSRNOT0000060155 | 16,634,199 | DOWNSTREAM            | A | T | - | - |
| MGC112692 | ENSRNOT0000060155 | 16,634,440 | DOWNSTREAM            | A | G | - | - |
| MGC112692 | ENSRNOT0000060155 | 16,634,495 | DOWNSTREAM            | A | C | - | - |
| MGC112692 | ENSRNOT0000060155 | 16,634,515 | DOWNSTREAM            | C | G | - | - |
| MGC112692 | ENSRNOT0000060155 | 16,634,774 | DOWNSTREAM            | C | G | - | - |
| MGC112692 | ENSRNOT0000060155 | 16,635,010 | 3PRIME_UTR            | G | A | - | - |
| MGC112692 | ENSRNOT0000060155 | 16,635,046 | NON_SYNONYMOUS_CODING | A | C | V | G |
| MGC112692 | ENSRNOT0000060155 | 16,635,542 | NON_SYNONYMOUS_CODING | C | T | V | I |
| MGC112692 | ENSRNOT0000060155 | 16,636,057 | 5PRIME_UTR            | G | A | - | - |
| MGC112692 | ENSRNOT0000060155 | 16,636,100 | 5PRIME_UTR            | G | A | - | - |
| MGC112692 | ENSRNOT0000060155 | 16,636,140 | 5PRIME_UTR            | G | A | - | - |
| MGC112692 | ENSRNOT0000060155 | 16,636,472 | INTRONIC              | C | T | - | - |
| MGC112692 | ENSRNOT0000060155 | 16,636,604 | INTRONIC              | G | A | - | - |
| MGC112692 | ENSRNOT0000060155 | 16,636,727 | INTRONIC              | A | G | - | - |
| MGC112692 | ENSRNOT0000060155 | 16,636,729 | INTRONIC              | G | A | - | - |
| MGC112692 | ENSRNOT0000060155 | 16,636,793 | INTRONIC              | A | T | - | - |
| MGC112692 | ENSRNOT0000060155 | 16,636,851 | INTRONIC              | A | C | - | - |
| MGC112692 | ENSRNOT0000060155 | 16,636,913 | INTRONIC              | T | A | - | - |
| MGC112692 | ENSRNOT0000060155 | 16,636,931 | INTRONIC              | G | T | - | - |
| MGC112692 | ENSRNOT0000060155 | 16,636,957 | INTRONIC              | C | T | - | - |
| MGC112692 | ENSRNOT0000060155 | 16,636,962 | INTRONIC              | C | T | - | - |
| MGC112692 | ENSRNOT0000060155 | 16,636,975 | INTRONIC              | T | C | - | - |
| MGC112692 | ENSRNOT0000060155 | 16,636,992 | INTRONIC              | T | A | - | - |
| MGC112692 | ENSRNOT0000060155 | 16,637,007 | INTRONIC              | A | C | - | - |
| MGC112692 | ENSRNOT0000060155 | 16,637,459 | INTRONIC              | T | C | - | - |
| MGC112692 | ENSRNOT0000060155 | 16,637,539 | INTRONIC              | T | A | - | - |
| MGC112692 | ENSRNOT0000060155 | 16,637,606 | INTRONIC              | A | T | - | - |
| MGC112692 | ENSRNOT0000060155 | 16,637,649 | INTRONIC              | G | T | - | - |
| MGC112692 | ENSRNOT0000060155 | 16,637,731 | INTRONIC              | G | T | - | - |
| MGC112692 | ENSRNOT0000060155 | 16,637,935 | INTRONIC              | G | C | - | - |
| MGC112692 | ENSRNOT0000060155 | 16,638,070 | INTRONIC              | T | G | - | - |
| MGC112692 | ENSRNOT0000060155 | 16,638,156 | INTRONIC              | C | A | - | - |
| MGC112692 | ENSRNOT0000060155 | 16,638,419 | INTRONIC              | G | A | - | - |
| MGC112692 | ENSRNOT0000060155 | 16,638,877 | INTRONIC              | T | C | - | - |
| MGC112692 | ENSRNOT0000060155 | 16,638,913 | INTRONIC              | C | A | - | - |
| MGC112692 | ENSRNOT0000060155 | 16,638,914 | INTRONIC              | T | C | - | - |
| MGC112692 | ENSRNOT0000060155 | 16,639,056 | INTRONIC              | T | C | - | - |
| MGC112692 | ENSRNOT0000060155 | 16,639,255 | INTRONIC              | T | G | - | - |
| MGC112692 | ENSRNOT0000060155 | 16,639,439 | INTRONIC              | G | A | - | - |
| MGC112692 | ENSRNOT0000060155 | 16,639,773 | 5PRIME_UTR            | A | C | - | - |
| MGC112692 | ENSRNOT0000060155 | 16,639,852 | 5PRIME_UTR            | C | T | - | - |
| MGC112692 | ENSRNOT0000060155 | 16,639,891 | UPSTREAM              | G | A | - | - |
| MGC112692 | ENSRNOT0000060155 | 16,639,915 | UPSTREAM              | T | C | - | - |
| MGC112692 | ENSRNOT0000060155 | 16,640,073 | UPSTREAM              | C | T | - | - |
| MGC112692 | ENSRNOT0000060155 | 16,640,107 | UPSTREAM              | G | T | - | - |
| MGC112692 | ENSRNOT0000060155 | 16,640,111 | UPSTREAM              | G | A | - | - |
| MGC112692 | ENSRNOT0000060155 | 16,640,146 | UPSTREAM              | G | A | - | - |
| MGC112692 | ENSRNOT0000060155 | 16,640,244 | UPSTREAM              | G | A | - | - |
| MGC112692 | ENSRNOT0000060155 | 16,640,301 | UPSTREAM              | G | T | - | - |
| MGC112692 | ENSRNOT0000060155 | 16,640,331 | UPSTREAM              | C | T | - | - |
| LOC288521 | ENSRNOT0000032844 | 16,640,370 | DOWNSTREAM            | T | A | - | - |
| LOC288521 | ENSRNOT0000032844 | 16,640,421 | DOWNSTREAM            | C | T | - | - |
| LOC288521 | ENSRNOT0000032844 | 16,640,671 | DOWNSTREAM            | T | G | - | - |
| LOC288521 | ENSRNOT0000032844 | 16,640,768 | DOWNSTREAM            | T | A | - | - |
| LOC288521 | ENSRNOT0000032844 | 16,640,854 | DOWNSTREAM            | T | C | - | - |
| LOC288521 | ENSRNOT0000032844 | 16,641,000 | DOWNSTREAM            | T | A | - | - |
| LOC288521 | ENSRNOT0000032844 | 16,641,004 | DOWNSTREAM            | G | A | - | - |
| LOC288521 | ENSRNOT0000032844 | 16,641,302 | DOWNSTREAM            | G | T | - | - |
| LOC288521 | ENSRNOT0000032844 | 16,641,524 | DOWNSTREAM            | A | C | - | - |
| LOC288521 | ENSRNOT0000032844 | 16,641,626 | DOWNSTREAM            | T | C | - | - |
| LOC288521 | ENSRNOT0000032844 | 16,641,659 | DOWNSTREAM            | C | G | - | - |
| LOC288521 | ENSRNOT0000032844 | 16,641,708 | DOWNSTREAM            | G | A | - | - |
| LOC288521 | ENSRNOT0000032844 | 16,641,879 | DOWNSTREAM            | C | A | - | - |
| LOC288521 | ENSRNOT0000032844 | 16,641,925 | DOWNSTREAM            | G | T | - | - |
| LOC288521 | ENSRNOT0000032844 | 16,642,265 | DOWNSTREAM            | T | C | - | - |
| LOC288521 | ENSRNOT0000032844 | 16,642,696 | DOWNSTREAM            | A | G | - | - |

|           |                    |            |                       |   |   |   |   |
|-----------|--------------------|------------|-----------------------|---|---|---|---|
| LOC288521 | ENSRNOT00000032844 | 16,642,766 | DOWNSTREAM            | C | T | - | - |
| LOC288521 | ENSRNOT00000032844 | 16,643,599 | DOWNSTREAM            | G | C | - | - |
| LOC288521 | ENSRNOT00000032844 | 16,643,601 | DOWNSTREAM            | A | C | - | - |
| LOC288521 | ENSRNOT00000032844 | 16,643,872 | DOWNSTREAM            | C | G | - | - |
| LOC288521 | ENSRNOT00000032844 | 16,643,882 | DOWNSTREAM            | T | C | - | - |
| LOC288521 | ENSRNOT00000032844 | 16,644,145 | DOWNSTREAM            | T | G | - | - |
| LOC288521 | ENSRNOT00000032844 | 16,644,386 | DOWNSTREAM            | C | A | - | - |
| LOC288521 | ENSRNOT00000032844 | 16,644,662 | DOWNSTREAM            | A | G | - | - |
| LOC288521 | ENSRNOT00000032844 | 16,644,813 | DOWNSTREAM            | A | C | - | - |
| LOC288521 | ENSRNOT00000032844 | 16,644,817 | DOWNSTREAM            | T | C | - | - |
| LOC288521 | ENSRNOT00000032844 | 16,645,592 | NON_SYNONYMOUS_CODING | A | C | C | G |
| LOC288521 | ENSRNOT00000032844 | 16,646,263 | NON_SYNONYMOUS_CODING | A | T | F | Y |
| LOC288521 | ENSRNOT00000032844 | 16,646,502 | 5PRIME_UTR            | T | C | - | - |
| LOC288521 | ENSRNOT00000032844 | 16,646,921 | INTRONIC              | C | G | - | - |
| LOC288521 | ENSRNOT00000032844 | 16,646,925 | INTRONIC              | G | A | - | - |
| LOC288521 | ENSRNOT00000032844 | 16,646,960 | INTRONIC              | T | G | - | - |
| LOC288521 | ENSRNOT00000032844 | 16,647,783 | INTRONIC              | T | C | - | - |
| LOC288521 | ENSRNOT00000032844 | 16,647,841 | INTRONIC              | T | C | - | - |
| LOC288521 | ENSRNOT00000032844 | 16,648,129 | INTRONIC              | C | A | - | - |
| LOC288521 | ENSRNOT00000032844 | 16,648,135 | INTRONIC              | T | C | - | - |
| LOC288521 | ENSRNOT00000032844 | 16,648,585 | INTRONIC              | C | A | - | - |
| LOC288521 | ENSRNOT00000032844 | 16,648,627 | INTRONIC              | A | G | - | - |
| LOC288521 | ENSRNOT00000032844 | 16,649,198 | INTRONIC              | A | G | - | - |
| LOC288521 | ENSRNOT00000032844 | 16,649,536 | INTRONIC              | G | C | - | - |
| LOC288521 | ENSRNOT00000032844 | 16,649,659 | INTRONIC              | T | C | - | - |
| LOC288521 | ENSRNOT00000032844 | 16,652,585 | INTRONIC              | A | C | - | - |
| LOC288521 | ENSRNOT00000032844 | 16,653,217 | INTRONIC              | T | C | - | - |
| LOC288521 | ENSRNOT00000032844 | 16,653,224 | INTRONIC              | T | C | - | - |
| LOC288521 | ENSRNOT00000032844 | 16,653,506 | INTRONIC              | G | A | - | - |
| LOC288521 | ENSRNOT00000032844 | 16,653,882 | INTRONIC              | T | G | - | - |
| LOC288521 | ENSRNOT00000032844 | 16,654,162 | INTRONIC              | A | G | - | - |
| LOC288521 | ENSRNOT00000032844 | 16,655,193 | INTRONIC              | C | G | - | - |
| LOC288521 | ENSRNOT00000032844 | 16,655,433 | INTRONIC              | C | A | - | - |
| LOC288521 | ENSRNOT00000032844 | 16,655,732 | INTRONIC              | A | G | - | - |
| LOC288521 | ENSRNOT00000032844 | 16,655,878 | INTRONIC              | A | G | - | - |
| LOC288521 | ENSRNOT00000032844 | 16,656,393 | 5PRIME_UTR            | T | C | - | - |
| LOC288521 | ENSRNOT00000032844 | 16,656,725 | UPSTREAM              | G | C | - | - |
| LOC288521 | ENSRNOT00000032844 | 16,656,987 | UPSTREAM              | T | A | - | - |
| LOC288521 | ENSRNOT00000032844 | 16,657,052 | UPSTREAM              | G | A | - | - |
| LOC288521 | ENSRNOT00000032844 | 16,657,073 | UPSTREAM              | A | G | - | - |
| LOC288521 | ENSRNOT00000032844 | 16,657,248 | UPSTREAM              | G | T | - | - |
| LOC288521 | ENSRNOT00000032844 | 16,657,409 | UPSTREAM              | A | T | - | - |
| LOC288521 | ENSRNOT00000032844 | 16,657,428 | UPSTREAM              | C | A | - | - |
| LOC288521 | ENSRNOT00000032844 | 16,657,628 | UPSTREAM              | G | T | - | - |
| LOC288521 | ENSRNOT00000032844 | 16,658,218 | UPSTREAM              | T | G | - | - |
| LOC288521 | ENSRNOT00000032844 | 16,658,322 | UPSTREAM              | G | C | - | - |
| LOC288521 | ENSRNOT00000032844 | 16,658,798 | UPSTREAM              | C | T | - | - |
| LOC288521 | ENSRNOT00000032844 | 16,660,351 | UPSTREAM              | C | T | - | - |
| LOC288521 | ENSRNOT00000032844 | 16,660,464 | UPSTREAM              | T | G | - | - |
| LOC288521 | ENSRNOT00000032844 | 16,660,950 | UPSTREAM              | A | C | - | - |
| LOC288521 | ENSRNOT00000032844 | 16,661,137 | UPSTREAM              | T | C | - | - |
| -         | -                  | 16,661,769 | INTERGENIC            | G | T | - | - |
| -         | -                  | 16,662,534 | INTERGENIC            | G | T | - | - |
| -         | -                  | 16,662,605 | INTERGENIC            | G | A | - | - |
| -         | -                  | 16,662,724 | INTERGENIC            | C | G | - | - |
| -         | -                  | 16,662,900 | INTERGENIC            | G | T | - | - |
| -         | -                  | 16,663,099 | INTERGENIC            | T | G | - | - |
| -         | -                  | 16,663,181 | INTERGENIC            | A | G | - | - |
| -         | -                  | 16,664,348 | INTERGENIC            | T | C | - | - |
| -         | -                  | 16,664,784 | INTERGENIC            | G | A | - | - |
| -         | -                  | 16,664,843 | INTERGENIC            | A | G | - | - |
| -         | -                  | 16,664,915 | INTERGENIC            | C | G | - | - |
| -         | -                  | 16,664,925 | INTERGENIC            | C | T | - | - |
| -         | -                  | 16,665,425 | INTERGENIC            | T | A | - | - |
| -         | -                  | 16,665,490 | INTERGENIC            | C | G | - | - |
| -         | -                  | 16,665,492 | INTERGENIC            | G | C | - | - |
| -         | -                  | 16,665,938 | INTERGENIC            | A | C | - | - |
| -         | -                  | 16,666,283 | INTERGENIC            | C | G | - | - |
| -         | -                  | 16,666,289 | INTERGENIC            | C | A | - | - |
| -         | -                  | 16,666,882 | INTERGENIC            | G | T | - | - |
| -         | -                  | 16,666,917 | INTERGENIC            | A | G | - | - |
| -         | -                  | 16,667,210 | INTERGENIC            | A | C | - | - |
| -         | -                  | 16,667,343 | INTERGENIC            | C | T | - | - |
| -         | -                  | 16,667,975 | INTERGENIC            | G | A | - | - |
| -         | -                  | 16,668,267 | INTERGENIC            | C | T | - | - |
| -         | -                  | 16,669,255 | INTERGENIC            | G | A | - | - |
| -         | -                  | 16,669,374 | INTERGENIC            | T | A | - | - |
| -         | -                  | 16,669,865 | INTERGENIC            | G | A | - | - |
| -         | -                  | 16,670,008 | INTERGENIC            | G | A | - | - |
| -         | -                  | 16,670,249 | INTERGENIC            | A | G | - | - |

|            |                   |            |            |   |   |   |   |
|------------|-------------------|------------|------------|---|---|---|---|
| -          | -                 | 16,670,270 | INTERGENIC | A | G | - | - |
| -          | -                 | 16,672,706 | INTERGENIC | T | C | - | - |
| -          | -                 | 16,673,464 | INTERGENIC | G | T | - | - |
| -          | -                 | 16,674,348 | INTERGENIC | A | G | - | - |
| -          | -                 | 16,675,142 | INTERGENIC | T | C | - | - |
| -          | -                 | 16,676,004 | INTERGENIC | C | T | - | - |
| -          | -                 | 16,676,376 | INTERGENIC | T | C | - | - |
| -          | -                 | 16,677,167 | INTERGENIC | G | A | - | - |
| -          | -                 | 16,677,468 | INTERGENIC | C | G | - | - |
| -          | -                 | 16,677,717 | INTERGENIC | T | G | - | - |
| -          | -                 | 16,678,488 | INTERGENIC | G | A | - | - |
| -          | -                 | 16,678,655 | INTERGENIC | A | G | - | - |
| -          | -                 | 16,679,208 | INTERGENIC | T | C | - | - |
| -          | -                 | 16,679,622 | INTERGENIC | C | A | - | - |
| -          | -                 | 16,682,216 | INTERGENIC | T | C | - | - |
| -          | -                 | 16,682,894 | INTERGENIC | C | T | - | - |
| -          | -                 | 16,683,922 | INTERGENIC | T | C | - | - |
| -          | -                 | 16,684,360 | INTERGENIC | C | T | - | - |
| -          | -                 | 16,684,365 | INTERGENIC | A | C | - | - |
| -          | -                 | 16,684,825 | INTERGENIC | A | G | - | - |
| -          | -                 | 16,685,346 | INTERGENIC | T | C | - | - |
| -          | -                 | 16,685,430 | INTERGENIC | C | G | - | - |
| -          | -                 | 16,687,543 | INTERGENIC | A | T | - | - |
| -          | -                 | 16,687,548 | INTERGENIC | A | G | - | - |
| -          | -                 | 16,689,200 | INTERGENIC | C | A | - | - |
| -          | -                 | 16,689,450 | INTERGENIC | T | A | - | - |
| -          | -                 | 16,689,502 | INTERGENIC | T | G | - | - |
| -          | -                 | 16,689,523 | INTERGENIC | A | T | - | - |
| -          | -                 | 16,689,549 | INTERGENIC | A | T | - | - |
| -          | -                 | 16,689,579 | INTERGENIC | T | A | - | - |
| -          | -                 | 16,689,603 | INTERGENIC | G | C | - | - |
| -          | -                 | 16,689,639 | INTERGENIC | G | T | - | - |
| -          | -                 | 16,691,026 | INTERGENIC | G | A | - | - |
| -          | -                 | 16,691,034 | INTERGENIC | C | A | - | - |
| -          | -                 | 16,691,938 | INTERGENIC | T | G | - | - |
| -          | -                 | 16,691,943 | INTERGENIC | A | G | - | - |
| -          | -                 | 16,693,827 | INTERGENIC | T | A | - | - |
| -          | -                 | 16,693,852 | INTERGENIC | A | T | - | - |
| -          | -                 | 16,693,897 | INTERGENIC | C | T | - | - |
| -          | -                 | 16,693,961 | INTERGENIC | A | G | - | - |
| -          | -                 | 16,693,989 | INTERGENIC | A | G | - | - |
| -          | -                 | 16,694,003 | INTERGENIC | G | C | - | - |
| -          | -                 | 16,694,910 | INTERGENIC | T | C | - | - |
| -          | -                 | 16,695,082 | INTERGENIC | T | C | - | - |
| -          | -                 | 16,695,911 | INTERGENIC | T | A | - | - |
| -          | -                 | 16,695,920 | INTERGENIC | C | T | - | - |
| -          | -                 | 16,695,993 | INTERGENIC | A | T | - | - |
| -          | -                 | 16,695,996 | INTERGENIC | G | A | - | - |
| -          | -                 | 16,696,078 | INTERGENIC | G | A | - | - |
| -          | -                 | 16,696,087 | INTERGENIC | G | A | - | - |
| -          | -                 | 16,696,364 | INTERGENIC | A | T | - | - |
| -          | -                 | 16,697,312 | INTERGENIC | C | T | - | - |
| -          | -                 | 16,697,574 | INTERGENIC | G | A | - | - |
| -          | -                 | 16,697,645 | INTERGENIC | C | T | - | - |
| -          | -                 | 16,697,856 | INTERGENIC | A | G | - | - |
| -          | -                 | 16,698,193 | INTERGENIC | T | C | - | - |
| -          | -                 | 16,698,252 | INTERGENIC | G | A | - | - |
| -          | -                 | 16,699,132 | INTERGENIC | G | A | - | - |
| -          | -                 | 16,699,600 | INTERGENIC | G | A | - | - |
| -          | -                 | 16,699,749 | INTERGENIC | C | T | - | - |
| -          | -                 | 16,700,567 | INTERGENIC | C | T | - | - |
| -          | -                 | 16,701,070 | INTERGENIC | A | G | - | - |
| -          | -                 | 16,701,123 | INTERGENIC | G | A | - | - |
| -          | -                 | 16,701,141 | INTERGENIC | T | G | - | - |
| -          | -                 | 16,701,228 | INTERGENIC | A | G | - | - |
| -          | -                 | 16,701,605 | INTERGENIC | C | T | - | - |
| -          | -                 | 16,701,914 | INTERGENIC | A | T | - | - |
| -          | -                 | 16,701,927 | INTERGENIC | T | C | - | - |
| -          | -                 | 16,703,147 | INTERGENIC | G | T | - | - |
| -          | -                 | 16,703,352 | INTERGENIC | A | G | - | - |
| -          | -                 | 16,703,398 | INTERGENIC | T | C | - | - |
| -          | -                 | 16,704,237 | INTERGENIC | T | C | - | - |
| -          | -                 | 16,704,305 | INTERGENIC | C | T | - | - |
| F1LXF2_RAT | ENSRNOT0000060153 | 16,704,746 | DOWNSTREAM | T | C | - | - |
| F1LXF2_RAT | ENSRNOT0000060153 | 16,705,011 | DOWNSTREAM | T | C | - | - |
| F1LXF2_RAT | ENSRNOT0000060153 | 16,705,143 | DOWNSTREAM | C | T | - | - |
| F1LXF2_RAT | ENSRNOT0000060153 | 16,706,659 | DOWNSTREAM | C | T | - | - |
| F1LXF2_RAT | ENSRNOT0000060153 | 16,706,685 | DOWNSTREAM | C | T | - | - |
| F1LXF2_RAT | ENSRNOT0000060153 | 16,706,686 | DOWNSTREAM | G | A | - | - |
| F1LXF2_RAT | ENSRNOT0000060153 | 16,707,266 | DOWNSTREAM | A | G | - | - |

|            |                   |            |                       |   |   |   |   |
|------------|-------------------|------------|-----------------------|---|---|---|---|
| F1LXF2_RAT | ENSRNOT0000060153 | 16,707,783 | DOWNSTREAM            | A | G | - | - |
| F1LXF2_RAT | ENSRNOT0000060153 | 16,707,968 | DOWNSTREAM            | A | G | - | - |
| F1LXF2_RAT | ENSRNOT0000060153 | 16,708,350 | DOWNSTREAM            | G | A | - | - |
| F1LXF2_RAT | ENSRNOT0000060153 | 16,709,026 | DOWNSTREAM            | C | A | - | - |
| F1LXF2_RAT | ENSRNOT0000060153 | 16,709,526 | NON_SYNONYMOUS_CODING | G | A | P | S |
| F1LXF2_RAT | ENSRNOT0000060153 | 16,709,741 | NON_SYNONYMOUS_CODING | C | T | R | Q |
| F1LXF2_RAT | ENSRNOT0000060153 | 16,710,000 | SYNONYMOUS_CODING     | T | C | - | - |
| F1LXF2_RAT | ENSRNOT0000060153 | 16,710,867 | INTRONIC              | T | C | - | - |
| F1LXF2_RAT | ENSRNOT0000060153 | 16,711,097 | INTRONIC              | G | C | - | - |
| F1LXF2_RAT | ENSRNOT0000060153 | 16,711,114 | INTRONIC              | C | G | - | - |
| F1LXF2_RAT | ENSRNOT0000060153 | 16,711,533 | INTRONIC              | T | C | - | - |
| F1LXF2_RAT | ENSRNOT0000060153 | 16,711,534 | INTRONIC              | A | G | - | - |
| F1LXF2_RAT | ENSRNOT0000060153 | 16,712,292 | INTRONIC              | G | A | - | - |
| F1LXF2_RAT | ENSRNOT0000060153 | 16,712,484 | INTRONIC              | C | T | - | - |
| F1LXF2_RAT | ENSRNOT0000060153 | 16,712,621 | INTRONIC              | C | T | - | - |
| F1LXF2_RAT | ENSRNOT0000060153 | 16,712,634 | INTRONIC              | T | C | - | - |
| F1LXF2_RAT | ENSRNOT0000060153 | 16,713,437 | INTRONIC              | G | A | - | - |
| F1LXF2_RAT | ENSRNOT0000060153 | 16,715,404 | INTRONIC              | G | A | - | - |
| F1LXF2_RAT | ENSRNOT0000060153 | 16,715,462 | INTRONIC              | A | G | - | - |
| F1LXF2_RAT | ENSRNOT0000060153 | 16,716,250 | INTRONIC              | A | G | - | - |
| F1LXF2_RAT | ENSRNOT0000060153 | 16,716,743 | INTRONIC              | T | C | - | - |
| F1LXF2_RAT | ENSRNOT0000060153 | 16,716,797 | NON_SYNONYMOUS_CODING | G | A | P | S |
| F1LXF2_RAT | ENSRNOT0000060153 | 16,716,801 | SYNONYMOUS_CODING     | C | T | - | - |
| F1LXF2_RAT | ENSRNOT0000060153 | 16,716,810 | SYNONYMOUS_CODING     | G | A | - | - |
| F1LXF2_RAT | ENSRNOT0000060153 | 16,716,811 | NON_SYNONYMOUS_CODING | G | T | T | N |
| F1LXF2_RAT | ENSRNOT0000060153 | 16,716,885 | INTRONIC              | G | A | - | - |
| F1LXF2_RAT | ENSRNOT0000060153 | 16,716,986 | INTRONIC              | T | C | - | - |
| F1LXF2_RAT | ENSRNOT0000060153 | 16,717,001 | INTRONIC              | T | C | - | - |
| F1LXF2_RAT | ENSRNOT0000060153 | 16,717,055 | INTRONIC              | G | A | - | - |
| F1LXF2_RAT | ENSRNOT0000060153 | 16,717,075 | INTRONIC              | G | A | - | - |
| F1LXF2_RAT | ENSRNOT0000060153 | 16,718,021 | INTRONIC              | A | G | - | - |
| F1LXF2_RAT | ENSRNOT0000060153 | 16,718,480 | INTRONIC              | A | C | - | - |
| F1LXF2_RAT | ENSRNOT0000060153 | 16,719,627 | INTRONIC              | G | A | - | - |
| F1LXF2_RAT | ENSRNOT0000060153 | 16,719,730 | INTRONIC              | T | G | - | - |
| F1LXF2_RAT | ENSRNOT0000060153 | 16,719,806 | INTRONIC              | A | G | - | - |
| F1LXF2_RAT | ENSRNOT0000060153 | 16,719,809 | INTRONIC              | A | G | - | - |
| F1LXF2_RAT | ENSRNOT0000060153 | 16,720,135 | INTRONIC              | A | G | - | - |
| F1LXF2_RAT | ENSRNOT0000060153 | 16,720,887 | INTRONIC              | C | G | - | - |
| F1LXF2_RAT | ENSRNOT0000060153 | 16,721,099 | INTRONIC              | T | A | - | - |
| F1LXF2_RAT | ENSRNOT0000060153 | 16,722,060 | INTRONIC              | G | A | - | - |
| F1LXF2_RAT | ENSRNOT0000060153 | 16,722,597 | INTRONIC              | T | C | - | - |
| F1LXF2_RAT | ENSRNOT0000060153 | 16,722,682 | INTRONIC              | C | A | - | - |
| F1LXF2_RAT | ENSRNOT0000060153 | 16,724,035 | INTRONIC              | A | G | - | - |
| F1LXF2_RAT | ENSRNOT0000060153 | 16,724,050 | INTRONIC              | A | G | - | - |
| F1LXF2_RAT | ENSRNOT0000060153 | 16,724,248 | INTRONIC              | T | G | - | - |
| F1LXF2_RAT | ENSRNOT0000060153 | 16,726,123 | INTRONIC              | C | A | - | - |
| F1LXF2_RAT | ENSRNOT0000060153 | 16,726,834 | INTRONIC              | C | T | - | - |
| F1LXF2_RAT | ENSRNOT0000060153 | 16,727,278 | INTRONIC              | A | G | - | - |
| F1LXF2_RAT | ENSRNOT0000060153 | 16,728,839 | INTRONIC              | A | G | - | - |
| F1LXF2_RAT | ENSRNOT0000060153 | 16,730,250 | INTRONIC              | A | G | - | - |
| F1LXF2_RAT | ENSRNOT0000060153 | 16,732,988 | INTRONIC              | C | T | - | - |
| F1LXF2_RAT | ENSRNOT0000060153 | 16,737,182 | INTRONIC              | A | T | - | - |
| F1LXF2_RAT | ENSRNOT0000060153 | 16,737,543 | INTRONIC              | T | C | - | - |
| F1LXF2_RAT | ENSRNOT0000060153 | 16,738,098 | INTRONIC              | T | G | - | - |
| F1LXF2_RAT | ENSRNOT0000060153 | 16,738,099 | INTRONIC              | A | T | - | - |
| F1LXF2_RAT | ENSRNOT0000060153 | 16,738,416 | INTRONIC              | C | T | - | - |
| F1LXF2_RAT | ENSRNOT0000060153 | 16,738,491 | INTRONIC              | G | C | - | - |
| F1LXF2_RAT | ENSRNOT0000060153 | 16,739,108 | INTRONIC              | T | C | - | - |
| F1LXF2_RAT | ENSRNOT0000060153 | 16,739,928 | INTRONIC              | A | C | - | - |
| F1LXF2_RAT | ENSRNOT0000060153 | 16,740,549 | INTRONIC              | C | T | - | - |
| F1LXF2_RAT | ENSRNOT0000060153 | 16,740,958 | INTRONIC              | C | T | - | - |
| F1LXF2_RAT | ENSRNOT0000060153 | 16,740,959 | INTRONIC              | A | G | - | - |
| F1LXF2_RAT | ENSRNOT0000060153 | 16,740,995 | INTRONIC              | C | T | - | - |
| F1LXF2_RAT | ENSRNOT0000060153 | 16,741,048 | INTRONIC              | G | T | - | - |
| F1LXF2_RAT | ENSRNOT0000060153 | 16,741,352 | INTRONIC              | C | G | - | - |
| F1LXF2_RAT | ENSRNOT0000060153 | 16,742,465 | INTRONIC              | C | T | - | - |
| F1LXF2_RAT | ENSRNOT0000060153 | 16,743,025 | INTRONIC              | G | A | - | - |
| F1LXF2_RAT | ENSRNOT0000060153 | 16,745,340 | INTRONIC              | T | G | - | - |
| F1LXF2_RAT | ENSRNOT0000060153 | 16,746,543 | INTRONIC              | A | G | - | - |
| F1LXF2_RAT | ENSRNOT0000060153 | 16,746,611 | INTRONIC              | G | A | - | - |
| F1LXF2_RAT | ENSRNOT0000060153 | 16,747,132 | INTRONIC              | T | C | - | - |
| F1LXF2_RAT | ENSRNOT0000060153 | 16,748,908 | INTRONIC              | G | T | - | - |
| F1LXF2_RAT | ENSRNOT0000060153 | 16,749,649 | INTRONIC              | G | A | - | - |
| F1LXF2_RAT | ENSRNOT0000060153 | 16,751,387 | INTRONIC              | A | G | - | - |
| F1LXF2_RAT | ENSRNOT0000060153 | 16,753,464 | UPSTREAM              | T | A | - | - |
| F1LXF2_RAT | ENSRNOT0000060153 | 16,753,657 | UPSTREAM              | G | A | - | - |
| Zfp157     | ENSRNOT0000030757 | 16,754,058 | DOWNSTREAM            | A | G | - | - |
| Zfp157     | ENSRNOT0000030757 | 16,756,500 | DOWNSTREAM            | A | G | - | - |
| Zfp157     | ENSRNOT0000030757 | 16,759,336 | SYNONYMOUS_CODING     | T | C | - | - |
| Zfp157     | ENSRNOT0000030757 | 16,760,472 | INTRONIC              | A | G | - | - |

|        |                    |            |            |   |   |   |   |
|--------|--------------------|------------|------------|---|---|---|---|
| Zfp157 | ENSRNOT00000030757 | 16,761,570 | INTRONIC   | A | T | - | - |
| Zfp157 | ENSRNOT00000030757 | 16,764,692 | INTRONIC   | A | G | - | - |
| Zfp157 | ENSRNOT00000030757 | 16,765,779 | INTRONIC   | C | T | - | - |
| Zfp157 | ENSRNOT00000030757 | 16,765,782 | INTRONIC   | T | C | - | - |
| Zfp157 | ENSRNOT00000030757 | 16,766,890 | INTRONIC   | G | A | - | - |
| Zfp157 | ENSRNOT00000030757 | 16,767,885 | INTRONIC   | C | T | - | - |
| Zfp157 | ENSRNOT00000030757 | 16,767,915 | INTRONIC   | C | T | - | - |
| Zfp157 | ENSRNOT00000030757 | 16,767,928 | INTRONIC   | G | A | - | - |
| Zfp157 | ENSRNOT00000030757 | 16,768,966 | INTRONIC   | C | T | - | - |
| Zfp157 | ENSRNOT00000030757 | 16,769,163 | INTRONIC   | A | G | - | - |
| Zfp157 | ENSRNOT00000030757 | 16,769,969 | INTRONIC   | T | A | - | - |
| Zfp157 | ENSRNOT00000030757 | 16,770,510 | INTRONIC   | T | C | - | - |
| Zfp157 | ENSRNOT00000030757 | 16,770,800 | INTRONIC   | T | C | - | - |
| Zfp157 | ENSRNOT00000030757 | 16,771,217 | INTRONIC   | C | A | - | - |
| Zfp157 | ENSRNOT00000030757 | 16,771,314 | INTRONIC   | A | G | - | - |
| Zfp157 | ENSRNOT00000030757 | 16,771,339 | INTRONIC   | T | C | - | - |
| Zfp157 | ENSRNOT00000030757 | 16,771,351 | INTRONIC   | T | C | - | - |
| Zfp157 | ENSRNOT00000030757 | 16,771,386 | INTRONIC   | T | C | - | - |
| Zfp157 | ENSRNOT00000030757 | 16,771,982 | INTRONIC   | G | T | - | - |
| Zfp157 | ENSRNOT00000030757 | 16,772,016 | INTRONIC   | T | C | - | - |
| Zfp157 | ENSRNOT00000030757 | 16,772,051 | INTRONIC   | T | C | - | - |
| Zfp157 | ENSRNOT00000030757 | 16,772,074 | INTRONIC   | C | T | - | - |
| Zfp157 | ENSRNOT00000030757 | 16,773,101 | INTRONIC   | C | A | - | - |
| Zfp157 | ENSRNOT00000030757 | 16,773,638 | INTRONIC   | G | T | - | - |
| Zfp157 | ENSRNOT00000030757 | 16,773,995 | INTRONIC   | G | A | - | - |
| Zfp157 | ENSRNOT00000030757 | 16,774,975 | INTRONIC   | C | T | - | - |
| Zfp157 | ENSRNOT00000030757 | 16,775,224 | INTRONIC   | A | G | - | - |
| Zfp157 | ENSRNOT00000030757 | 16,776,289 | INTRONIC   | A | T | - | - |
| Zfp157 | ENSRNOT00000030757 | 16,777,454 | INTRONIC   | C | T | - | - |
| Zfp157 | ENSRNOT00000030757 | 16,778,063 | INTRONIC   | A | G | - | - |
| Zfp157 | ENSRNOT00000030757 | 16,778,150 | INTRONIC   | G | A | - | - |
| Zfp157 | ENSRNOT00000030757 | 16,778,265 | INTRONIC   | G | A | - | - |
| Zfp157 | ENSRNOT00000030757 | 16,779,535 | INTRONIC   | G | A | - | - |
| Zfp157 | ENSRNOT00000030757 | 16,780,208 | UPSTREAM   | A | G | - | - |
| Zfp157 | ENSRNOT00000030757 | 16,780,226 | UPSTREAM   | A | G | - | - |
| Zfp157 | ENSRNOT00000030757 | 16,781,250 | UPSTREAM   | G | T | - | - |
| Zfp157 | ENSRNOT00000030757 | 16,781,506 | UPSTREAM   | T | A | - | - |
| Zfp157 | ENSRNOT00000030757 | 16,781,997 | UPSTREAM   | C | T | - | - |
| Zfp157 | ENSRNOT00000030757 | 16,782,026 | UPSTREAM   | T | C | - | - |
| Zfp157 | ENSRNOT00000030757 | 16,782,067 | UPSTREAM   | C | G | - | - |
| Zfp157 | ENSRNOT00000030757 | 16,782,077 | UPSTREAM   | C | T | - | - |
| Zfp157 | ENSRNOT00000030757 | 16,782,264 | UPSTREAM   | T | G | - | - |
| Zfp157 | ENSRNOT00000030757 | 16,782,302 | UPSTREAM   | G | A | - | - |
| Zfp157 | ENSRNOT00000030757 | 16,782,430 | UPSTREAM   | A | T | - | - |
| Zfp157 | ENSRNOT00000030757 | 16,782,470 | UPSTREAM   | A | C | - | - |
| Zfp157 | ENSRNOT00000030757 | 16,782,474 | UPSTREAM   | A | G | - | - |
| Zfp157 | ENSRNOT00000030757 | 16,782,542 | UPSTREAM   | G | A | - | - |
| Zfp157 | ENSRNOT00000030757 | 16,782,576 | UPSTREAM   | C | A | - | - |
| Zfp157 | ENSRNOT00000030757 | 16,782,622 | UPSTREAM   | A | T | - | - |
| Zfp157 | ENSRNOT00000030757 | 16,782,811 | UPSTREAM   | G | T | - | - |
| Zfp157 | ENSRNOT00000030757 | 16,782,946 | UPSTREAM   | G | A | - | - |
| Zfp157 | ENSRNOT00000030757 | 16,783,245 | UPSTREAM   | G | A | - | - |
| Zfp157 | ENSRNOT00000030757 | 16,783,876 | UPSTREAM   | T | G | - | - |
| Zfp157 | ENSRNOT00000030757 | 16,784,261 | UPSTREAM   | G | A | - | - |
| Zfp157 | ENSRNOT00000030757 | 16,784,287 | UPSTREAM   | G | A | - | - |
| Zfp157 | ENSRNOT00000030757 | 16,784,320 | UPSTREAM   | C | T | - | - |
| Zfp157 | ENSRNOT00000030757 | 16,784,371 | UPSTREAM   | A | G | - | - |
| Zfp157 | ENSRNOT00000030757 | 16,784,933 | UPSTREAM   | T | C | - | - |
| -      | -                  | 16,785,064 | INTERGENIC | C | G | - | - |
| -      | -                  | 16,785,309 | INTERGENIC | T | C | - | - |
| -      | -                  | 16,785,356 | INTERGENIC | C | G | - | - |
| -      | -                  | 16,786,431 | INTERGENIC | C | T | - | - |
| -      | -                  | 16,786,470 | INTERGENIC | G | A | - | - |
| -      | -                  | 16,786,648 | INTERGENIC | A | T | - | - |
| -      | -                  | 16,786,883 | INTERGENIC | C | T | - | - |
| -      | -                  | 16,787,003 | INTERGENIC | G | A | - | - |
| -      | -                  | 16,787,013 | INTERGENIC | C | T | - | - |
| -      | -                  | 16,787,222 | INTERGENIC | G | A | - | - |
| -      | -                  | 16,787,487 | INTERGENIC | G | A | - | - |
| -      | -                  | 16,789,244 | INTERGENIC | G | T | - | - |
| -      | -                  | 16,789,408 | INTERGENIC | C | T | - | - |
| -      | -                  | 16,789,435 | INTERGENIC | T | C | - | - |
| -      | -                  | 16,789,447 | INTERGENIC | A | G | - | - |
| -      | -                  | 16,789,495 | INTERGENIC | G | A | - | - |
| -      | -                  | 16,790,292 | INTERGENIC | T | G | - | - |
| -      | -                  | 16,790,312 | INTERGENIC | A | G | - | - |
| -      | -                  | 16,790,387 | INTERGENIC | G | A | - | - |
| -      | -                  | 16,790,402 | INTERGENIC | A | G | - | - |
| -      | -                  | 16,790,731 | INTERGENIC | T | G | - | - |
| -      | -                  | 16,790,776 | INTERGENIC | G | A | - | - |

|            |                    |            |            |   |   |   |   |
|------------|--------------------|------------|------------|---|---|---|---|
|            | -                  | 16,791,011 | INTERGENIC | G | A | - | - |
|            | -                  | 16,791,093 | INTERGENIC | C | A | - | - |
|            | -                  | 16,791,122 | INTERGENIC | G | A | - | - |
|            | -                  | 16,791,271 | INTERGENIC | G | A | - | - |
|            | -                  | 16,791,796 | INTERGENIC | G | A | - | - |
|            | -                  | 16,791,908 | INTERGENIC | G | A | - | - |
|            | -                  | 16,792,418 | INTERGENIC | T | C | - | - |
|            | -                  | 16,792,509 | INTERGENIC | G | A | - | - |
|            | -                  | 16,792,554 | INTERGENIC | C | A | - | - |
|            | -                  | 16,792,561 | INTERGENIC | A | G | - | - |
|            | -                  | 16,792,823 | INTERGENIC | G | C | - | - |
|            | -                  | 16,793,223 | INTERGENIC | A | T | - | - |
|            | -                  | 16,793,373 | INTERGENIC | T | G | - | - |
|            | -                  | 16,793,381 | INTERGENIC | G | A | - | - |
|            | -                  | 16,793,436 | INTERGENIC | C | T | - | - |
|            | -                  | 16,793,441 | INTERGENIC | C | T | - | - |
|            | -                  | 16,793,748 | INTERGENIC | G | A | - | - |
|            | -                  | 16,793,985 | INTERGENIC | T | A | - | - |
|            | -                  | 16,794,190 | INTERGENIC | T | C | - | - |
|            | -                  | 16,795,009 | INTERGENIC | A | G | - | - |
|            | -                  | 16,795,121 | INTERGENIC | T | A | - | - |
|            | -                  | 16,795,518 | INTERGENIC | A | T | - | - |
|            | -                  | 16,795,916 | INTERGENIC | C | T | - | - |
|            | -                  | 16,797,628 | INTERGENIC | G | A | - | - |
|            | -                  | 16,797,927 | INTERGENIC | T | C | - | - |
|            | -                  | 16,797,955 | INTERGENIC | G | A | - | - |
|            | -                  | 16,799,076 | INTERGENIC | T | C | - | - |
|            | -                  | 16,799,235 | INTERGENIC | A | G | - | - |
|            | -                  | 16,801,563 | INTERGENIC | C | T | - | - |
| E9PTT7_RAT | ENSRNOT00000029485 | 16,802,803 | UPSTREAM   | A | G | - | - |
| E9PTT7_RAT | ENSRNOT00000029485 | 16,803,825 | UPSTREAM   | G | A | - | - |
| E9PTT7_RAT | ENSRNOT00000029485 | 16,803,826 | UPSTREAM   | A | G | - | - |
| E9PTT7_RAT | ENSRNOT00000029485 | 16,804,955 | UPSTREAM   | G | T | - | - |
| E9PTT7_RAT | ENSRNOT00000029485 | 16,806,086 | UPSTREAM   | T | G | - | - |
| E9PTT7_RAT | ENSRNOT00000029485 | 16,806,581 | UPSTREAM   | T | C | - | - |
| Asmt       | ENSRNOT00000001791 | 16,806,929 | DOWNSTREAM | A | T | - | - |
| Asmt       | ENSRNOT00000001791 | 16,807,955 | DOWNSTREAM | C | T | - | - |
| Asmt       | ENSRNOT00000001791 | 16,808,068 | DOWNSTREAM | G | A | - | - |
| Asmt       | ENSRNOT00000001791 | 16,808,180 | DOWNSTREAM | T | G | - | - |
| Asmt       | ENSRNOT00000001791 | 16,808,501 | DOWNSTREAM | C | A | - | - |
| Asmt       | ENSRNOT00000001791 | 16,809,366 | DOWNSTREAM | G | T | - | - |
| Asmt       | ENSRNOT00000001791 | 16,809,390 | DOWNSTREAM | G | A | - | - |
| Asmt       | ENSRNOT00000001791 | 16,809,915 | DOWNSTREAM | A | C | - | - |
| Asmt       | ENSRNOT00000001791 | 16,813,489 | INTRONIC   | G | A | - | - |
| Asmt       | ENSRNOT00000001791 | 16,814,507 | INTRONIC   | A | C | - | - |
| E9PTT7_RAT | ENSRNOT00000029485 | 16,816,292 | DOWNSTREAM | C | T | - | - |
| Asmt       | ENSRNOT00000001791 | 16,817,700 | UPSTREAM   | T | C | - | - |
| Asmt       | ENSRNOT00000001791 | 16,818,972 | UPSTREAM   | A | G | - | - |
| Asmt       | ENSRNOT00000001791 | 16,819,704 | UPSTREAM   | C | T | - | - |
| Asmt       | ENSRNOT00000001791 | 16,820,062 | UPSTREAM   | G | A | - | - |
| Asmt       | ENSRNOT00000001791 | 16,820,464 | UPSTREAM   | T | G | - | - |
| Asmt       | ENSRNOT00000001791 | 16,821,170 | UPSTREAM   | C | T | - | - |
| Asmt       | ENSRNOT00000001791 | 16,822,143 | UPSTREAM   | C | T | - | - |
| E9PSX4_RAT | ENSRNOT00000001792 | 16,822,904 | DOWNSTREAM | T | C | - | - |
| E9PSX4_RAT | ENSRNOT00000001792 | 16,823,665 | DOWNSTREAM | G | C | - | - |
| E9PSX4_RAT | ENSRNOT00000001792 | 16,823,762 | DOWNSTREAM | G | C | - | - |
| E9PSX4_RAT | ENSRNOT00000001792 | 16,824,366 | DOWNSTREAM | T | G | - | - |
| E9PSX4_RAT | ENSRNOT00000001792 | 16,826,080 | INTRONIC   | A | G | - | - |
| E9PSX4_RAT | ENSRNOT00000001792 | 16,826,597 | INTRONIC   | T | C | - | - |
| E9PSX4_RAT | ENSRNOT00000001792 | 16,827,213 | INTRONIC   | T | G | - | - |
| E9PSX4_RAT | ENSRNOT00000001792 | 16,828,364 | INTRONIC   | C | T | - | - |
| E9PSX4_RAT | ENSRNOT00000001792 | 16,828,644 | INTRONIC   | G | T | - | - |
| D4AA35_RAT | ENSRNOT00000036606 | 16,828,745 | DOWNSTREAM | A | G | - | - |
| D4AA35_RAT | ENSRNOT00000036606 | 16,828,844 | DOWNSTREAM | C | T | - | - |
| E9PSX4_RAT | ENSRNOT00000001792 | 16,830,482 | UPSTREAM   | T | C | - | - |
| E9PSX4_RAT | ENSRNOT00000001792 | 16,832,002 | UPSTREAM   | T | C | - | - |
| E9PSX4_RAT | ENSRNOT00000001792 | 16,833,844 | UPSTREAM   | T | C | - | - |
| E9PSX4_RAT | ENSRNOT00000001792 | 16,834,494 | UPSTREAM   | A | T | - | - |
|            | -                  | 16,836,290 | INTERGENIC | A | G | - | - |
|            | -                  | 16,843,417 | INTERGENIC | C | T | - | - |
|            | -                  | 16,843,632 | INTERGENIC | G | A | - | - |
|            | -                  | 16,843,633 | INTERGENIC | C | A | - | - |
|            | -                  | 16,843,741 | INTERGENIC | C | T | - | - |
|            | -                  | 16,843,772 | INTERGENIC | G | A | - | - |
|            | -                  | 16,845,356 | INTERGENIC | G | A | - | - |
|            | -                  | 16,845,420 | INTERGENIC | G | T | - | - |
|            | -                  | 16,847,762 | INTERGENIC | T | C | - | - |
|            | -                  | 16,848,236 | INTERGENIC | A | G | - | - |
|            | -                  | 16,848,263 | INTERGENIC | C | T | - | - |
|            | -                  | 16,849,326 | INTERGENIC | C | T | - | - |

|        |                    |            |                       |   |   |   |   |
|--------|--------------------|------------|-----------------------|---|---|---|---|
|        | -                  | 16,849,340 | INTERGENIC            | A | G | - | - |
|        | -                  | 16,849,936 | INTERGENIC            | C | T | - | - |
|        | -                  | 16,850,386 | INTERGENIC            | T | A | - | - |
|        | -                  | 16,850,531 | INTERGENIC            | C | T | - | - |
|        | -                  | 16,851,629 | INTERGENIC            | C | T | - | - |
|        | -                  | 16,852,035 | INTERGENIC            | A | G | - | - |
|        | -                  | 16,852,987 | INTERGENIC            | G | C | - | - |
|        | -                  | 16,859,768 | INTERGENIC            | A | G | - | - |
|        | -                  | 16,860,174 | INTERGENIC            | A | C | - | - |
|        | -                  | 16,860,791 | INTERGENIC            | T | C | - | - |
|        | -                  | 16,862,723 | INTERGENIC            | G | C | - | - |
|        | -                  | 16,863,967 | INTERGENIC            | T | C | - | - |
|        | -                  | 16,879,620 | INTERGENIC            | C | T | - | - |
|        | -                  | 16,880,868 | INTERGENIC            | G | T | - | - |
|        | -                  | 16,882,105 | INTERGENIC            | T | C | - | - |
|        | -                  | 16,883,111 | INTERGENIC            | T | C | - | - |
|        | -                  | 16,883,165 | INTERGENIC            | G | T | - | - |
|        | -                  | 16,883,680 | INTERGENIC            | T | A | - | - |
|        | -                  | 16,883,761 | INTERGENIC            | C | G | - | - |
|        | -                  | 16,884,199 | INTERGENIC            | A | T | - | - |
|        | -                  | 16,884,313 | INTERGENIC            | G | A | - | - |
|        | -                  | 16,884,647 | INTERGENIC            | G | C | - | - |
|        | -                  | 16,884,707 | INTERGENIC            | C | T | - | - |
|        | -                  | 16,884,919 | INTERGENIC            | T | A | - | - |
|        | -                  | 16,885,213 | INTERGENIC            | T | C | - | - |
|        | -                  | 16,885,214 | INTERGENIC            | G | T | - | - |
|        | -                  | 16,885,888 | INTERGENIC            | T | G | - | - |
|        | -                  | 16,886,117 | INTERGENIC            | C | G | - | - |
|        | -                  | 16,886,484 | INTERGENIC            | C | G | - | - |
|        | -                  | 16,886,556 | INTERGENIC            | C | T | - | - |
|        | -                  | 16,886,619 | INTERGENIC            | T | C | - | - |
|        | -                  | 16,886,656 | INTERGENIC            | T | C | - | - |
|        | -                  | 16,886,849 | INTERGENIC            | A | G | - | - |
|        | -                  | 16,887,186 | INTERGENIC            | A | T | - | - |
|        | -                  | 16,887,237 | INTERGENIC            | T | A | - | - |
|        | -                  | 16,887,368 | INTERGENIC            | T | A | - | - |
|        | -                  | 16,887,652 | INTERGENIC            | T | G | - | - |
|        | -                  | 16,889,089 | INTERGENIC            | G | T | - | - |
|        | -                  | 16,889,195 | INTERGENIC            | C | T | - | - |
|        | -                  | 16,889,691 | INTERGENIC            | T | C | - | - |
|        | -                  | 16,890,112 | INTERGENIC            | G | A | - | - |
|        | -                  | 16,890,213 | INTERGENIC            | T | C | - | - |
|        | -                  | 16,899,289 | INTERGENIC            | G | T | - | - |
|        | -                  | 17,125,605 | INTERGENIC            | A | G | - | - |
|        | -                  | 17,125,720 | INTERGENIC            | C | T | - | - |
|        | ENSRNOT00000041909 | 17,139,337 | UPSTREAM              | T | A | - | - |
| Cyp3a9 | ENSRNOT00000001863 | 17,168,105 | INTRONIC              | C | T | - | - |
| Cyp3a9 | ENSRNOT00000001863 | 17,168,772 | INTRONIC              | G | T | - | - |
| Cyp3a9 | ENSRNOT00000001863 | 17,168,926 | INTRONIC              | G | A | - | - |
| Cyp3a9 | ENSRNOT00000001863 | 17,171,816 | INTRONIC              | C | T | - | - |
| Cyp3a9 | ENSRNOT00000001863 | 17,172,356 | INTRONIC              | A | G | - | - |
| Cyp3a9 | ENSRNOT00000001863 | 17,172,367 | INTRONIC              | A | G | - | - |
| Cyp3a9 | ENSRNOT00000001863 | 17,172,648 | INTRONIC              | T | C | - | - |
| Cyp3a9 | ENSRNOT00000001863 | 17,172,734 | INTRONIC              | A | G | - | - |
| Cyp3a9 | ENSRNOT00000001863 | 17,173,976 | INTRONIC              | T | C | - | - |
| Cyp3a9 | ENSRNOT00000001863 | 17,174,111 | INTRONIC              | T | C | - | - |
| Cyp3a9 | ENSRNOT00000001863 | 17,174,782 | INTRONIC              | C | T | - | - |
| Cyp3a9 | ENSRNOT00000001863 | 17,174,846 | INTRONIC              | T | G | - | - |
| Cyp3a9 | ENSRNOT00000001863 | 17,175,126 | INTRONIC              | A | G | - | - |
| Cyp3a9 | ENSRNOT00000001863 | 17,175,936 | INTRONIC              | C | A | - | - |
| Cyp3a9 | ENSRNOT00000001863 | 17,176,374 | INTRONIC              | G | T | - | - |
| Cyp3a9 | ENSRNOT00000001863 | 17,176,498 | NON_SYNONYMOUS_CODING | A | G | I | V |
| Cyp3a9 | ENSRNOT00000001863 | 17,176,677 | INTRONIC              | C | T | - | - |
| Cyp3a9 | ENSRNOT00000001863 | 17,177,589 | INTRONIC              | C | T | - | - |
| Cyp3a9 | ENSRNOT00000001863 | 17,177,733 | INTRONIC              | T | C | - | - |
| Cyp3a9 | ENSRNOT00000001863 | 17,177,770 | INTRONIC              | G | A | - | - |
| Cyp3a9 | ENSRNOT00000001863 | 17,177,994 | INTRONIC              | G | A | - | - |
| Cyp3a9 | ENSRNOT00000001863 | 17,178,132 | INTRONIC              | T | C | - | - |
| Cyp3a9 | ENSRNOT00000001863 | 17,178,147 | INTRONIC              | C | A | - | - |
| Cyp3a9 | ENSRNOT00000001863 | 17,178,245 | INTRONIC              | T | C | - | - |
| Cyp3a9 | ENSRNOT00000001863 | 17,178,378 | INTRONIC              | A | G | - | - |
| Cyp3a9 | ENSRNOT00000001863 | 17,178,723 | INTRONIC              | A | T | - | - |
| Cyp3a9 | ENSRNOT00000001863 | 17,178,771 | INTRONIC              | C | T | - | - |
| Cyp3a9 | ENSRNOT00000001863 | 17,179,285 | INTRONIC              | T | C | - | - |
| Cyp3a9 | ENSRNOT00000001863 | 17,179,495 | INTRONIC              | T | C | - | - |
| Cyp3a9 | ENSRNOT00000001863 | 17,179,886 | INTRONIC              | G | A | - | - |
| Cyp3a9 | ENSRNOT00000001863 | 17,180,030 | INTRONIC              | T | C | - | - |
| Cyp3a9 | ENSRNOT00000001863 | 17,180,032 | INTRONIC              | C | T | - | - |
| Cyp3a9 | ENSRNOT00000001863 | 17,180,074 | INTRONIC              | C | T | - | - |
| Cyp3a9 | ENSRNOT00000001863 | 17,180,182 | INTRONIC              | A | G | - | - |

|        |                    |            |            |   |   |   |   |
|--------|--------------------|------------|------------|---|---|---|---|
| Cyp3a9 | ENSRNOT00000001863 | 17,180,341 | INTRONIC   | C | A | - | - |
| Cyp3a9 | ENSRNOT00000001863 | 17,181,207 | INTRONIC   | G | A | - | - |
| Cyp3a9 | ENSRNOT00000001863 | 17,182,460 | INTRONIC   | T | A | - | - |
| Cyp3a9 | ENSRNOT00000001863 | 17,183,187 | INTRONIC   | C | T | - | - |
| Cyp3a9 | ENSRNOT00000001863 | 17,183,819 | INTRONIC   | T | C | - | - |
| Cyp3a9 | ENSRNOT00000001863 | 17,183,977 | INTRONIC   | G | A | - | - |
| Cyp3a9 | ENSRNOT00000001863 | 17,184,019 | INTRONIC   | T | C | - | - |
| Cyp3a9 | ENSRNOT00000001863 | 17,184,042 | INTRONIC   | T | C | - | - |
| Cyp3a9 | ENSRNOT00000001863 | 17,184,047 | INTRONIC   | C | T | - | - |
| Cyp3a9 | ENSRNOT00000001863 | 17,185,676 | INTRONIC   | T | C | - | - |
| Cyp3a9 | ENSRNOT00000001863 | 17,186,566 | INTRONIC   | G | A | - | - |
| Cyp3a9 | ENSRNOT00000001863 | 17,189,773 | INTRONIC   | T | C | - | - |
| Cyp3a9 | ENSRNOT00000001863 | 17,190,097 | INTRONIC   | C | T | - | - |
| Cyp3a9 | ENSRNOT00000001863 | 17,190,197 | INTRONIC   | T | C | - | - |
| Cyp3a9 | ENSRNOT00000001863 | 17,190,336 | INTRONIC   | C | G | - | - |
| Cyp3a9 | ENSRNOT00000001863 | 17,192,069 | INTRONIC   | T | C | - | - |
| Cyp3a9 | ENSRNOT00000001863 | 17,192,174 | INTRONIC   | C | T | - | - |
| Cyp3a9 | ENSRNOT00000001863 | 17,198,380 | INTRONIC   | G | C | - | - |
| Cyp3a9 | ENSRNOT00000001863 | 17,198,881 | INTRONIC   | T | C | - | - |
| Cyp3a9 | ENSRNOT00000001863 | 17,198,935 | INTRONIC   | C | A | - | - |
| Cyp3a9 | ENSRNOT00000001863 | 17,199,275 | INTRONIC   | C | A | - | - |
| Cyp3a9 | ENSRNOT00000001863 | 17,199,285 | INTRONIC   | A | G | - | - |
| Cyp3a9 | ENSRNOT00000001863 | 17,199,310 | INTRONIC   | T | C | - | - |
| Cyp3a9 | ENSRNOT00000001863 | 17,199,790 | INTRONIC   | T | C | - | - |
| Cyp3a9 | ENSRNOT00000001863 | 17,199,819 | INTRONIC   | C | G | - | - |
| Cyp3a9 | ENSRNOT00000001863 | 17,200,701 | INTRONIC   | C | G | - | - |
| Cyp3a9 | ENSRNOT00000001863 | 17,201,006 | INTRONIC   | G | A | - | - |
| Cyp3a9 | ENSRNOT00000001863 | 17,201,484 | INTRONIC   | C | T | - | - |
| Cyp3a9 | ENSRNOT00000001863 | 17,201,543 | INTRONIC   | A | G | - | - |
| Cyp3a9 | ENSRNOT00000001863 | 17,203,169 | INTRONIC   | C | T | - | - |
| Cyp3a9 | ENSRNOT00000001863 | 17,203,198 | INTRONIC   | A | G | - | - |
| Cyp3a9 | ENSRNOT00000001863 | 17,203,389 | INTRONIC   | G | T | - | - |
| Cyp3a9 | ENSRNOT00000001863 | 17,203,457 | INTRONIC   | A | G | - | - |
| Cyp3a9 | ENSRNOT00000001863 | 17,203,655 | INTRONIC   | A | G | - | - |
| Cyp3a9 | ENSRNOT00000001863 | 17,204,400 | 3PRIME_UTR | A | G | - | - |
| Cyp3a9 | ENSRNOT00000001863 | 17,204,459 | 3PRIME_UTR | T | A | - | - |
| Cyp3a9 | ENSRNOT00000001863 | 17,205,286 | DOWNSTREAM | C | T | - | - |
| Cyp3a9 | ENSRNOT00000001863 | 17,205,342 | DOWNSTREAM | A | C | - | - |
| Cyp3a9 | ENSRNOT00000001863 | 17,206,266 | DOWNSTREAM | G | A | - | - |
| Cyp3a9 | ENSRNOT00000001863 | 17,206,828 | DOWNSTREAM | T | A | - | - |
| Cyp3a9 | ENSRNOT00000001863 | 17,207,334 | DOWNSTREAM | G | C | - | - |
| Cyp3a9 | ENSRNOT00000001863 | 17,207,456 | DOWNSTREAM | G | A | - | - |
| Cyp3a9 | ENSRNOT00000001863 | 17,207,459 | DOWNSTREAM | G | A | - | - |
| Cyp3a9 | ENSRNOT00000001863 | 17,209,133 | DOWNSTREAM | A | T | - | - |
| Cyp3a9 | ENSRNOT00000001863 | 17,209,189 | DOWNSTREAM | C | G | - | - |
| Cyp3a9 | ENSRNOT00000001863 | 17,209,191 | DOWNSTREAM | C | A | - | - |
| -      | -                  | 17,210,720 | INTERGENIC | C | T | - | - |
| -      | -                  | 17,211,472 | INTERGENIC | G | T | - | - |
| -      | -                  | 17,211,534 | INTERGENIC | T | G | - | - |
| -      | -                  | 17,213,145 | INTERGENIC | C | T | - | - |
| -      | -                  | 17,214,076 | INTERGENIC | C | A | - | - |
| -      | -                  | 17,214,548 | INTERGENIC | T | A | - | - |
| -      | -                  | 17,214,603 | INTERGENIC | C | T | - | - |
| -      | -                  | 17,214,681 | INTERGENIC | T | C | - | - |
| -      | -                  | 17,214,804 | INTERGENIC | G | A | - | - |
| -      | -                  | 17,214,962 | INTERGENIC | G | A | - | - |
| -      | -                  | 17,215,232 | INTERGENIC | T | C | - | - |
| -      | -                  | 17,216,189 | INTERGENIC | G | A | - | - |
| -      | -                  | 17,216,195 | INTERGENIC | G | A | - | - |
| -      | -                  | 17,221,710 | INTERGENIC | C | A | - | - |
| -      | -                  | 17,222,702 | INTERGENIC | T | A | - | - |
| -      | -                  | 17,222,876 | INTERGENIC | T | C | - | - |
| -      | -                  | 17,223,311 | INTERGENIC | C | T | - | - |
| -      | -                  | 17,223,315 | INTERGENIC | C | T | - | - |
| -      | -                  | 17,223,393 | INTERGENIC | T | C | - | - |
| -      | -                  | 17,223,814 | INTERGENIC | A | G | - | - |
| -      | -                  | 17,225,443 | INTERGENIC | C | T | - | - |
| -      | -                  | 17,226,364 | INTERGENIC | T | C | - | - |
| -      | -                  | 17,226,708 | INTERGENIC | A | C | - | - |
| -      | -                  | 17,226,718 | INTERGENIC | C | G | - | - |
| -      | -                  | 17,227,306 | INTERGENIC | G | A | - | - |
| -      | -                  | 17,227,506 | INTERGENIC | T | C | - | - |
| -      | -                  | 17,227,984 | INTERGENIC | C | T | - | - |
| -      | -                  | 17,229,056 | INTERGENIC | C | A | - | - |
| -      | -                  | 17,229,551 | INTERGENIC | G | T | - | - |
| -      | -                  | 17,230,632 | INTERGENIC | A | C | - | - |
| -      | -                  | 17,231,150 | INTERGENIC | A | G | - | - |
| -      | -                  | 17,233,392 | INTERGENIC | A | G | - | - |
| -      | -                  | 17,233,456 | INTERGENIC | G | C | - | - |
| -      | -                  | 17,233,731 | INTERGENIC | C | T | - | - |



|       |                    |            |                   |   |   |   |   |
|-------|--------------------|------------|-------------------|---|---|---|---|
| -     | -                  | 17,233,843 | INTERGENIC        | C | T | - | - |
| -     | -                  | 17,235,944 | INTERGENIC        | T | G | - | - |
| -     | -                  | 17,237,645 | INTERGENIC        | T | A | - | - |
| -     | -                  | 17,238,833 | INTERGENIC        | T | C | - | - |
| -     | -                  | 17,239,000 | INTERGENIC        | T | A | - | - |
| -     | -                  | 17,240,355 | INTERGENIC        | C | G | - | - |
| -     | -                  | 17,240,729 | INTERGENIC        | T | C | - | - |
| -     | -                  | 17,241,007 | INTERGENIC        | A | G | - | - |
| -     | -                  | 17,241,696 | INTERGENIC        | C | A | - | - |
| -     | -                  | 17,241,741 | INTERGENIC        | T | A | - | - |
| -     | -                  | 17,241,743 | INTERGENIC        | T | A | - | - |
| Vamp7 | ENSRNOT00000011065 | 17,246,494 | DOWNSTREAM        | A | G | - | - |
| Vamp7 | ENSRNOT00000011065 | 17,249,393 | INTRONIC          | G | A | - | - |
| Vamp7 | ENSRNOT00000011065 | 17,249,842 | SYNONYMOUS_CODING | C | T | - | - |
| Vamp7 | ENSRNOT00000011065 | 17,250,419 | INTRONIC          | C | T | - | - |
| Vamp7 | ENSRNOT00000011065 | 17,250,932 | INTRONIC          | C | T | - | - |
| Vamp7 | ENSRNOT00000011065 | 17,250,956 | INTRONIC          | G | T | - | - |
| Vamp7 | ENSRNOT00000011065 | 17,251,072 | INTRONIC          | G | T | - | - |
| Vamp7 | ENSRNOT00000011065 | 17,251,299 | INTRONIC          | A | G | - | - |
| Vamp7 | ENSRNOT00000011065 | 17,251,303 | INTRONIC          | T | C | - | - |
| Vamp7 | ENSRNOT00000011065 | 17,251,399 | INTRONIC          | C | T | - | - |
| Vamp7 | ENSRNOT00000011065 | 17,251,405 | INTRONIC          | T | C | - | - |
| Vamp7 | ENSRNOT00000011065 | 17,251,714 | INTRONIC          | T | C | - | - |
| Vamp7 | ENSRNOT00000011065 | 17,251,861 | INTRONIC          | A | T | - | - |
| Vamp7 | ENSRNOT00000011065 | 17,251,964 | INTRONIC          | G | A | - | - |
| Vamp7 | ENSRNOT00000011065 | 17,252,601 | INTRONIC          | T | G | - | - |
| Vamp7 | ENSRNOT00000011065 | 17,252,686 | INTRONIC          | T | A | - | - |
| Vamp7 | ENSRNOT00000011065 | 17,252,837 | INTRONIC          | A | G | - | - |
| Vamp7 | ENSRNOT00000011065 | 17,253,545 | INTRONIC          | C | T | - | - |
| Vamp7 | ENSRNOT00000011065 | 17,253,847 | INTRONIC          | A | G | - | - |
| Vamp7 | ENSRNOT00000011065 | 17,253,891 | INTRONIC          | T | C | - | - |
| Vamp7 | ENSRNOT00000011065 | 17,254,016 | INTRONIC          | G | A | - | - |
| Vamp7 | ENSRNOT00000011065 | 17,254,162 | INTRONIC          | G | A | - | - |
| Vamp7 | ENSRNOT00000011065 | 17,254,397 | INTRONIC          | C | T | - | - |
| Vamp7 | ENSRNOT00000011065 | 17,254,651 | INTRONIC          | A | G | - | - |
| Vamp7 | ENSRNOT00000011065 | 17,255,028 | INTRONIC          | C | T | - | - |
| Vamp7 | ENSRNOT00000011065 | 17,255,718 | INTRONIC          | T | C | - | - |
| Vamp7 | ENSRNOT00000011065 | 17,256,074 | INTRONIC          | A | G | - | - |
| Vamp7 | ENSRNOT00000011065 | 17,257,293 | INTRONIC          | C | T | - | - |
| Vamp7 | ENSRNOT00000011065 | 17,257,874 | INTRONIC          | T | G | - | - |
| Vamp7 | ENSRNOT00000011065 | 17,257,974 | INTRONIC          | T | A | - | - |
| Vamp7 | ENSRNOT00000011065 | 17,258,337 | INTRONIC          | C | T | - | - |
| Vamp7 | ENSRNOT00000011065 | 17,258,565 | INTRONIC          | T | C | - | - |
| Vamp7 | ENSRNOT00000011065 | 17,258,597 | INTRONIC          | A | C | - | - |
| Vamp7 | ENSRNOT00000011065 | 17,258,663 | INTRONIC          | C | T | - | - |
| Vamp7 | ENSRNOT00000011065 | 17,258,722 | INTRONIC          | T | A | - | - |
| Vamp7 | ENSRNOT00000011065 | 17,259,106 | INTRONIC          | A | G | - | - |
| Vamp7 | ENSRNOT00000011065 | 17,259,645 | INTRONIC          | A | T | - | - |
| Vamp7 | ENSRNOT00000011065 | 17,259,682 | INTRONIC          | T | C | - | - |
| Vamp7 | ENSRNOT00000011065 | 17,259,907 | INTRONIC          | G | C | - | - |
| Vamp7 | ENSRNOT00000011065 | 17,260,135 | INTRONIC          | T | C | - | - |
| Vamp7 | ENSRNOT00000011065 | 17,260,275 | INTRONIC          | C | T | - | - |
| Vamp7 | ENSRNOT00000011065 | 17,260,600 | INTRONIC          | G | A | - | - |
| Vamp7 | ENSRNOT00000011065 | 17,260,695 | INTRONIC          | A | C | - | - |
| Vamp7 | ENSRNOT00000011065 | 17,260,896 | INTRONIC          | G | A | - | - |
| Vamp7 | ENSRNOT00000011065 | 17,261,211 | INTRONIC          | C | A | - | - |
| Vamp7 | ENSRNOT00000011065 | 17,261,308 | INTRONIC          | G | A | - | - |
| Vamp7 | ENSRNOT00000011065 | 17,261,492 | INTRONIC          | G | A | - | - |
| Vamp7 | ENSRNOT00000011065 | 17,261,522 | INTRONIC          | C | T | - | - |
| Vamp7 | ENSRNOT00000011065 | 17,261,540 | INTRONIC          | A | G | - | - |
| Vamp7 | ENSRNOT00000011065 | 17,261,816 | INTRONIC          | A | T | - | - |
| Vamp7 | ENSRNOT00000011065 | 17,261,818 | INTRONIC          | A | T | - | - |
| Vamp7 | ENSRNOT00000011065 | 17,261,845 | INTRONIC          | T | C | - | - |
| Vamp7 | ENSRNOT00000011065 | 17,261,865 | INTRONIC          | T | C | - | - |
| Vamp7 | ENSRNOT00000011065 | 17,261,895 | INTRONIC          | C | T | - | - |
| Vamp7 | ENSRNOT00000011065 | 17,261,983 | INTRONIC          | T | A | - | - |
| Vamp7 | ENSRNOT00000011065 | 17,262,387 | INTRONIC          | T | C | - | - |
| Vamp7 | ENSRNOT00000011065 | 17,263,288 | INTRONIC          | T | A | - | - |
| Vamp7 | ENSRNOT00000011065 | 17,263,289 | INTRONIC          | G | C | - | - |
| Vamp7 | ENSRNOT00000011065 | 17,263,455 | INTRONIC          | C | T | - | - |
| Vamp7 | ENSRNOT00000011065 | 17,263,681 | INTRONIC          | A | T | - | - |
| Vamp7 | ENSRNOT00000011065 | 17,263,692 | INTRONIC          | G | T | - | - |
| Vamp7 | ENSRNOT00000011065 | 17,268,975 | INTRONIC          | T | C | - | - |
| Vamp7 | ENSRNOT00000011065 | 17,269,005 | INTRONIC          | C | T | - | - |
| Vamp7 | ENSRNOT00000011065 | 17,269,079 | INTRONIC          | C | A | - | - |
| Vamp7 | ENSRNOT00000011065 | 17,272,269 | INTRONIC          | C | G | - | - |
| Vamp7 | ENSRNOT00000011065 | 17,272,322 | INTRONIC          | C | G | - | - |
| Vamp7 | ENSRNOT00000011065 | 17,272,765 | INTRONIC          | A | G | - | - |
| Vamp7 | ENSRNOT00000011065 | 17,272,844 | SYNONYMOUS_CODING | T | C | - | - |
| Vamp7 | ENSRNOT00000011065 | 17,273,081 | INTRONIC          | C | G | - | - |

|       |                    |            |            |   |   |   |   |
|-------|--------------------|------------|------------|---|---|---|---|
| Vamp7 | ENSRNOT00000011065 | 17,273,121 | INTRONIC   | C | G | - | - |
| Vamp7 | ENSRNOT00000011065 | 17,273,135 | INTRONIC   | C | A | - | - |
| Vamp7 | ENSRNOT00000011065 | 17,273,789 | INTRONIC   | G | A | - | - |
| Vamp7 | ENSRNOT00000011065 | 17,273,825 | INTRONIC   | G | T | - | - |
| Vamp7 | ENSRNOT00000011065 | 17,273,929 | INTRONIC   | A | T | - | - |
| Vamp7 | ENSRNOT00000011065 | 17,273,935 | INTRONIC   | A | G | - | - |
| Vamp7 | ENSRNOT00000011065 | 17,274,339 | INTRONIC   | C | T | - | - |
| Vamp7 | ENSRNOT00000011065 | 17,274,549 | INTRONIC   | C | T | - | - |
| Vamp7 | ENSRNOT00000011065 | 17,274,629 | INTRONIC   | C | T | - | - |
| Vamp7 | ENSRNOT00000011065 | 17,274,930 | INTRONIC   | A | G | - | - |
| Vamp7 | ENSRNOT00000011065 | 17,275,027 | INTRONIC   | T | A | - | - |
| Vamp7 | ENSRNOT00000011065 | 17,275,407 | INTRONIC   | C | T | - | - |
| Vamp7 | ENSRNOT00000011065 | 17,275,821 | INTRONIC   | A | G | - | - |
| Vamp7 | ENSRNOT00000011065 | 17,276,019 | INTRONIC   | C | T | - | - |
| Vamp7 | ENSRNOT00000011065 | 17,278,541 | UPSTREAM   | A | G | - | - |
| Vamp7 | ENSRNOT00000011065 | 17,279,518 | UPSTREAM   | G | A | - | - |
|       | -                  | 17,283,423 | INTERGENIC | G | A | - | - |
|       | -                  | 17,287,716 | INTERGENIC | T | C | - | - |
|       | -                  | 17,288,513 | INTERGENIC | C | T | - | - |
|       | -                  | 17,290,558 | INTERGENIC | C | G | - | - |
|       | -                  | 17,291,152 | INTERGENIC | T | A | - | - |
|       | -                  | 17,291,472 | INTERGENIC | T | G | - | - |
|       | -                  | 17,292,472 | INTERGENIC | C | A | - | - |
|       | -                  | 17,294,083 | INTERGENIC | C | A | - | - |
|       | -                  | 17,294,085 | INTERGENIC | G | A | - | - |
|       | -                  | 17,294,416 | INTERGENIC | G | C | - | - |
|       | -                  | 17,295,912 | INTERGENIC | T | C | - | - |
|       | -                  | 17,296,210 | INTERGENIC | A | G | - | - |
|       | -                  | 17,297,030 | INTERGENIC | T | A | - | - |
|       | -                  | 17,299,635 | INTERGENIC | A | G | - | - |
|       | -                  | 17,300,655 | INTERGENIC | G | A | - | - |
|       | -                  | 17,300,677 | INTERGENIC | C | T | - | - |
|       | -                  | 17,300,859 | INTERGENIC | T | C | - | - |
|       | -                  | 17,300,888 | INTERGENIC | C | T | - | - |
|       | -                  | 17,301,151 | INTERGENIC | C | G | - | - |
|       | -                  | 17,301,368 | INTERGENIC | C | A | - | - |
|       | -                  | 17,301,563 | INTERGENIC | C | T | - | - |
|       | -                  | 17,307,059 | INTERGENIC | G | T | - | - |
|       | -                  | 17,309,438 | INTERGENIC | G | T | - | - |
|       | -                  | 17,309,686 | INTERGENIC | T | A | - | - |
|       | -                  | 17,313,137 | INTERGENIC | T | A | - | - |
|       | -                  | 17,313,579 | INTERGENIC | T | A | - | - |
|       | -                  | 17,313,715 | INTERGENIC | A | G | - | - |
|       | -                  | 17,314,154 | INTERGENIC | C | T | - | - |
|       | -                  | 17,314,665 | INTERGENIC | C | T | - | - |
|       | -                  | 17,314,732 | INTERGENIC | G | A | - | - |
|       | -                  | 17,316,543 | INTERGENIC | G | T | - | - |
|       | -                  | 17,316,664 | INTERGENIC | A | T | - | - |
|       | -                  | 17,316,808 | INTERGENIC | C | G | - | - |
|       | -                  | 17,317,278 | INTERGENIC | G | A | - | - |
|       | -                  | 17,317,406 | INTERGENIC | A | G | - | - |
|       | -                  | 17,317,730 | INTERGENIC | T | C | - | - |
|       | -                  | 17,318,034 | INTERGENIC | C | T | - | - |
|       | -                  | 17,318,364 | INTERGENIC | G | A | - | - |
|       | -                  | 17,318,432 | INTERGENIC | A | G | - | - |
|       | -                  | 17,319,626 | INTERGENIC | T | C | - | - |
| U6    | ENSRNOT00000069985 | 17,322,222 | DOWNSTREAM | C | T | - | - |
| U6    | ENSRNOT00000069985 | 17,322,497 | DOWNSTREAM | C | T | - | - |
| U6    | ENSRNOT00000069985 | 17,324,584 | DOWNSTREAM | C | G | - | - |
| U6    | ENSRNOT00000069985 | 17,325,644 | UPSTREAM   | C | T | - | - |
| U6    | ENSRNOT00000069985 | 17,325,667 | UPSTREAM   | T | G | - | - |
| U6    | ENSRNOT00000069985 | 17,325,841 | UPSTREAM   | C | G | - | - |
| U6    | ENSRNOT00000069985 | 17,326,398 | UPSTREAM   | G | T | - | - |
| U6    | ENSRNOT00000069985 | 17,326,617 | UPSTREAM   | C | T | - | - |
| U6    | ENSRNOT00000069985 | 17,327,209 | UPSTREAM   | A | G | - | - |
| U6    | ENSRNOT00000069985 | 17,327,323 | UPSTREAM   | T | C | - | - |
| U6    | ENSRNOT00000069985 | 17,327,537 | UPSTREAM   | C | T | - | - |
| U6    | ENSRNOT00000069985 | 17,327,655 | UPSTREAM   | T | A | - | - |
| U6    | ENSRNOT00000069985 | 17,328,089 | UPSTREAM   | G | A | - | - |
| U6    | ENSRNOT00000069985 | 17,328,653 | UPSTREAM   | A | G | - | - |
| U6    | ENSRNOT00000069985 | 17,328,676 | UPSTREAM   | T | C | - | - |
| U6    | ENSRNOT00000069985 | 17,328,982 | UPSTREAM   | C | T | - | - |
| U6    | ENSRNOT00000069985 | 17,328,993 | UPSTREAM   | C | G | - | - |
| U6    | ENSRNOT00000069985 | 17,329,110 | UPSTREAM   | G | A | - | - |
|       | -                  | 17,330,847 | INTERGENIC | T | G | - | - |
|       | -                  | 17,331,046 | INTERGENIC | G | A | - | - |
|       | -                  | 17,332,097 | INTERGENIC | T | G | - | - |
|       | -                  | 17,333,843 | INTERGENIC | T | C | - | - |
|       | -                  | 17,333,851 | INTERGENIC | G | A | - | - |
|       | -                  | 17,335,264 | INTERGENIC | T | A | - | - |

|            |                    |            |                       |   |   |   |   |
|------------|--------------------|------------|-----------------------|---|---|---|---|
| Spry3      | ENSRNOT00000011128 | 17,338,360 | DOWNSTREAM            | C | T | - | - |
| Spry3      | ENSRNOT00000011128 | 17,338,362 | DOWNSTREAM            | T | C | - | - |
| Spry3      | ENSRNOT00000011128 | 17,338,784 | DOWNSTREAM            | C | T | - | - |
| Spry3      | ENSRNOT00000011128 | 17,339,554 | DOWNSTREAM            | C | T | - | - |
| Spry3      | ENSRNOT00000011128 | 17,343,558 | NON_SYNONYMOUS_CODING | C | A | G | V |
| Spry3      | ENSRNOT00000011128 | 17,343,990 | 5PRIME_UTR            | C | T | - | - |
| Spry3      | ENSRNOT00000011128 | 17,344,633 | INTRONIC              | G | A | - | - |
| Spry3      | ENSRNOT00000011128 | 17,345,263 | INTRONIC              | A | G | - | - |
| Spry3      | ENSRNOT00000011128 | 17,345,865 | INTRONIC              | T | A | - | - |
| Spry3      | ENSRNOT00000011128 | 17,346,400 | INTRONIC              | G | A | - | - |
| Spry3      | ENSRNOT00000011128 | 17,346,687 | INTRONIC              | G | A | - | - |
| Spry3      | ENSRNOT00000011128 | 17,346,881 | INTRONIC              | A | G | - | - |
| Spry3      | ENSRNOT00000011128 | 17,347,117 | INTRONIC              | T | C | - | - |
| Spry3      | ENSRNOT00000011128 | 17,348,452 | INTRONIC              | A | G | - | - |
| Spry3      | ENSRNOT00000011128 | 17,349,271 | INTRONIC              | C | T | - | - |
| Spry3      | ENSRNOT00000011128 | 17,349,312 | INTRONIC              | T | C | - | - |
| Spry3      | ENSRNOT00000011128 | 17,349,636 | INTRONIC              | A | G | - | - |
| Spry3      | ENSRNOT00000011128 | 17,349,726 | INTRONIC              | C | T | - | - |
| Spry3      | ENSRNOT00000011128 | 17,349,738 | INTRONIC              | G | A | - | - |
| Spry3      | ENSRNOT00000011128 | 17,350,238 | UPSTREAM              | G | A | - | - |
| Spry3      | ENSRNOT00000011128 | 17,352,073 | UPSTREAM              | C | T | - | - |
| Spry3      | ENSRNOT00000011128 | 17,352,803 | UPSTREAM              | T | C | - | - |
| Spry3      | ENSRNOT00000011128 | 17,353,637 | UPSTREAM              | C | T | - | - |
| Spry3      | ENSRNOT00000011128 | 17,353,997 | UPSTREAM              | C | T | - | - |
| Spry3      | ENSRNOT00000011128 | 17,354,249 | UPSTREAM              | A | G | - | - |
| Spry3      | ENSRNOT00000011128 | 17,354,464 | UPSTREAM              | A | G | - | - |
| Spry3      | ENSRNOT00000011128 | 17,354,490 | UPSTREAM              | A | G | - | - |
| Spry3      | ENSRNOT00000011128 | 17,354,849 | UPSTREAM              | T | C | - | - |
| Spry3      | ENSRNOT00000011128 | 17,354,910 | UPSTREAM              | T | C | - | - |
| Spry3      | ENSRNOT00000011128 | 17,355,039 | UPSTREAM              | T | C | - | - |
| -          | -                  | 17,355,474 | INTERGENIC            | C | A | - | - |
| -          | -                  | 17,355,523 | INTERGENIC            | G | A | - | - |
| -          | -                  | 17,355,861 | INTERGENIC            | T | C | - | - |
| -          | -                  | 17,355,980 | INTERGENIC            | G | C | - | - |
| -          | -                  | 17,356,162 | INTERGENIC            | G | C | - | - |
| -          | -                  | 17,356,164 | INTERGENIC            | C | T | - | - |
| -          | -                  | 17,356,205 | INTERGENIC            | C | T | - | - |
| -          | -                  | 17,356,877 | INTERGENIC            | C | T | - | - |
| -          | -                  | 17,357,033 | INTERGENIC            | G | T | - | - |
| -          | -                  | 17,357,183 | INTERGENIC            | T | A | - | - |
| -          | -                  | 17,357,323 | INTERGENIC            | G | C | - | - |
| -          | -                  | 17,357,834 | INTERGENIC            | G | A | - | - |
| -          | -                  | 17,359,595 | INTERGENIC            | A | G | - | - |
| -          | -                  | 17,359,753 | INTERGENIC            | A | T | - | - |
| -          | -                  | 17,360,740 | INTERGENIC            | G | T | - | - |
| -          | -                  | 17,361,007 | INTERGENIC            | A | G | - | - |
| -          | -                  | 17,361,079 | INTERGENIC            | A | G | - | - |
| -          | -                  | 17,361,130 | INTERGENIC            | C | T | - | - |
| -          | -                  | 17,361,252 | INTERGENIC            | G | A | - | - |
| -          | -                  | 17,361,359 | INTERGENIC            | C | A | - | - |
| -          | -                  | 17,362,095 | INTERGENIC            | T | C | - | - |
| -          | -                  | 17,362,198 | INTERGENIC            | A | G | - | - |
| -          | -                  | 17,362,357 | INTERGENIC            | C | A | - | - |
| -          | -                  | 17,362,530 | INTERGENIC            | A | G | - | - |
| -          | -                  | 17,362,941 | INTERGENIC            | C | T | - | - |
| -          | -                  | 17,363,210 | INTERGENIC            | T | C | - | - |
| -          | -                  | 17,365,044 | INTERGENIC            | T | C | - | - |
| -          | -                  | 17,366,092 | INTERGENIC            | C | A | - | - |
| -          | -                  | 17,366,540 | INTERGENIC            | G | A | - | - |
| -          | -                  | 17,367,189 | INTERGENIC            | G | A | - | - |
| -          | -                  | 17,368,156 | INTERGENIC            | T | G | - | - |
| -          | -                  | 17,368,568 | INTERGENIC            | G | A | - | - |
| -          | -                  | 17,368,628 | INTERGENIC            | A | G | - | - |
| -          | -                  | 17,369,261 | INTERGENIC            | C | T | - | - |
| -          | -                  | 17,369,346 | INTERGENIC            | T | G | - | - |
| -          | -                  | 17,370,119 | INTERGENIC            | C | T | - | - |
| -          | -                  | 17,370,355 | INTERGENIC            | A | G | - | - |
| -          | -                  | 17,370,814 | INTERGENIC            | G | A | - | - |
| -          | -                  | 17,371,019 | INTERGENIC            | A | G | - | - |
| -          | -                  | 17,371,161 | INTERGENIC            | G | A | - | - |
| -          | -                  | 17,371,213 | INTERGENIC            | C | T | - | - |
| -          | -                  | 17,372,090 | INTERGENIC            | G | A | - | - |
| -          | -                  | 17,372,239 | INTERGENIC            | C | G | - | - |
| -          | -                  | 17,372,437 | INTERGENIC            | T | C | - | - |
| -          | -                  | 17,373,503 | INTERGENIC            | C | G | - | - |
| -          | -                  | 17,376,624 | INTERGENIC            | T | A | - | - |
| D3ZJS8_RAT | ENSRNOT00000037641 | 17,383,478 | UPSTREAM              | A | G | - | - |
| D3ZJS8_RAT | ENSRNOT00000037641 | 17,390,429 | DOWNSTREAM            | T | C | - | - |
| D3ZJS8_RAT | ENSRNOT00000037641 | 17,390,735 | DOWNSTREAM            | G | A | - | - |
| D3ZJS8_RAT | ENSRNOT00000037641 | 17,391,252 | DOWNSTREAM            | T | G | - | - |

|            |                    |            |                       |   |   |   |   |
|------------|--------------------|------------|-----------------------|---|---|---|---|
|            | ENSRNOT00000041068 | 17,421,285 | DOWNSTREAM            | T | A | - | - |
| D4ABZ9_RAT | ENSRNOT00000045401 | 17,448,814 | DOWNSTREAM            | C | T | - | - |
| D4ABZ9_RAT | ENSRNOT00000045401 | 17,449,079 | DOWNSTREAM            | T | G | - | - |
| D4ABZ9_RAT | ENSRNOT00000045401 | 17,450,394 | DOWNSTREAM            | A | G | - | - |
| D4ABZ9_RAT | ENSRNOT00000045401 | 17,450,410 | DOWNSTREAM            | G | A | - | - |
| D4ABZ9_RAT | ENSRNOT00000045401 | 17,450,435 | DOWNSTREAM            | C | T | - | - |
| D4ABZ9_RAT | ENSRNOT00000045401 | 17,451,101 | DOWNSTREAM            | T | C | - | - |
| D4ABZ9_RAT | ENSRNOT00000045401 | 17,451,142 | DOWNSTREAM            | T | C | - | - |
| Gjc3       | ENSRNOT00000001797 | 17,460,343 | DOWNSTREAM            | T | A | - | - |
| Gjc3       | ENSRNOT00000001797 | 17,460,632 | DOWNSTREAM            | G | A | - | - |
| Gjc3       | ENSRNOT00000001797 | 17,462,928 | UPSTREAM              | G | A | - | - |
|            | -                  | 17,468,791 | INTERGENIC            | G | A | - | - |
|            | -                  | 17,468,795 | INTERGENIC            | A | G | - | - |
|            | -                  | 17,468,952 | INTERGENIC            | A | G | - | - |
|            | -                  | 17,468,960 | INTERGENIC            | G | A | - | - |
|            | -                  | 17,469,427 | INTERGENIC            | G | C | - | - |
|            | -                  | 17,469,434 | INTERGENIC            | C | G | - | - |
|            | -                  | 17,470,649 | INTERGENIC            | G | C | - | - |
|            | -                  | 17,470,657 | INTERGENIC            | G | C | - | - |
|            | -                  | 17,470,705 | INTERGENIC            | C | G | - | - |
|            | -                  | 17,470,749 | INTERGENIC            | C | G | - | - |
|            | -                  | 17,470,777 | INTERGENIC            | C | G | - | - |
|            | -                  | 17,470,805 | INTERGENIC            | G | C | - | - |
|            | -                  | 17,470,809 | INTERGENIC            | G | C | - | - |
|            | -                  | 17,473,913 | INTERGENIC            | C | A | - | - |
|            | -                  | 17,476,357 | INTERGENIC            | G | T | - | - |
|            | -                  | 17,476,659 | INTERGENIC            | A | T | - | - |
|            | -                  | 17,476,701 | INTERGENIC            | C | T | - | - |
|            | -                  | 17,477,647 | INTERGENIC            | C | T | - | - |
|            | -                  | 17,477,743 | INTERGENIC            | G | A | - | - |
|            | -                  | 17,477,876 | INTERGENIC            | A | G | - | - |
|            | -                  | 17,477,969 | INTERGENIC            | A | G | - | - |
|            | -                  | 17,478,028 | INTERGENIC            | T | C | - | - |
|            | -                  | 17,478,320 | INTERGENIC            | G | A | - | - |
|            | -                  | 17,478,339 | INTERGENIC            | A | G | - | - |
|            | -                  | 17,478,624 | INTERGENIC            | T | G | - | - |
|            | -                  | 17,478,653 | INTERGENIC            | A | G | - | - |
|            | -                  | 17,478,668 | INTERGENIC            | G | A | - | - |
|            | -                  | 17,478,686 | INTERGENIC            | A | G | - | - |
|            | -                  | 17,479,084 | INTERGENIC            | G | A | - | - |
|            | -                  | 17,479,098 | INTERGENIC            | T | C | - | - |
|            | -                  | 17,479,396 | INTERGENIC            | C | T | - | - |
|            | -                  | 17,479,424 | INTERGENIC            | T | C | - | - |
|            | -                  | 17,479,813 | INTERGENIC            | G | A | - | - |
|            | -                  | 17,479,925 | INTERGENIC            | A | G | - | - |
|            | -                  | 17,487,356 | INTERGENIC            | A | G | - | - |
|            | -                  | 17,487,717 | INTERGENIC            | G | A | - | - |
|            | -                  | 17,487,734 | INTERGENIC            | G | A | - | - |
| Azgp1      | ENSRNOT00000001801 | 17,488,238 | UPSTREAM              | A | G | - | - |
| Azgp1      | ENSRNOT00000001801 | 17,488,372 | UPSTREAM              | C | G | - | - |
| Azgp1      | ENSRNOT00000001801 | 17,488,398 | UPSTREAM              | G | C | - | - |
| Azgp1      | ENSRNOT00000001801 | 17,488,647 | UPSTREAM              | A | T | - | - |
| Azgp1      | ENSRNOT00000001801 | 17,489,149 | UPSTREAM              | A | G | - | - |
| Azgp1      | ENSRNOT00000001801 | 17,489,497 | UPSTREAM              | A | G | - | - |
| Azgp1      | ENSRNOT00000001801 | 17,489,570 | UPSTREAM              | A | G | - | - |
| Azgp1      | ENSRNOT00000001801 | 17,489,572 | UPSTREAM              | G | A | - | - |
| Azgp1      | ENSRNOT00000001801 | 17,490,966 | UPSTREAM              | T | C | - | - |
| Azgp1      | ENSRNOT00000001801 | 17,491,094 | UPSTREAM              | C | T | - | - |
| Azgp1      | ENSRNOT00000001801 | 17,491,533 | UPSTREAM              | G | A | - | - |
| Azgp1      | ENSRNOT00000001801 | 17,492,385 | UPSTREAM              | G | A | - | - |
| Azgp1      | ENSRNOT00000001801 | 17,492,486 | UPSTREAM              | C | T | - | - |
| Azgp1      | ENSRNOT00000001801 | 17,492,733 | UPSTREAM              | G | A | - | - |
| Azgp1      | ENSRNOT00000001801 | 17,492,778 | UPSTREAM              | T | C | - | - |
| Azgp1      | ENSRNOT00000001801 | 17,493,864 | INTRONIC              | C | G | - | - |
| Azgp1      | ENSRNOT00000001801 | 17,493,866 | INTRONIC              | C | G | - | - |
| Azgp1      | ENSRNOT00000001801 | 17,494,146 | NON_SYNONYMOUS_CODING | T | C | L | P |
| Azgp1      | ENSRNOT00000001801 | 17,494,370 | INTRONIC              | A | T | - | - |
| Azgp1      | ENSRNOT00000001801 | 17,494,532 | INTRONIC              | G | A | - | - |
| Azgp1      | ENSRNOT00000001801 | 17,494,605 | INTRONIC              | A | G | - | - |
| Azgp1      | ENSRNOT00000001801 | 17,494,849 | INTRONIC              | T | C | - | - |
| Azgp1      | ENSRNOT00000001801 | 17,494,857 | INTRONIC              | C | T | - | - |
| Azgp1      | ENSRNOT00000001801 | 17,495,133 | INTRONIC              | G | C | - | - |
| Azgp1      | ENSRNOT00000001801 | 17,495,301 | INTRONIC              | T | C | - | - |
| Azgp1      | ENSRNOT00000001801 | 17,495,302 | INTRONIC              | T | C | - | - |
| Azgp1      | ENSRNOT00000001801 | 17,495,789 | INTRONIC              | A | G | - | - |
| Azgp1      | ENSRNOT00000001801 | 17,496,207 | INTRONIC              | A | G | - | - |
| Azgp1      | ENSRNOT00000001801 | 17,496,313 | SYNONYMOUS_CODING     | T | C | - | - |
| Azgp1      | ENSRNOT00000001801 | 17,496,777 | INTRONIC              | C | T | - | - |
| Azgp1      | ENSRNOT00000001801 | 17,496,778 | INTRONIC              | C | A | - | - |
| Azgp1      | ENSRNOT00000001801 | 17,496,822 | INTRONIC              | A | T | - | - |

|         |                    |            |            |   |   |   |   |
|---------|--------------------|------------|------------|---|---|---|---|
| Azgp1   | ENSRNOT00000001801 | 17,496,838 | INTRONIC   | A | G | - | - |
| Azgp1   | ENSRNOT00000001801 | 17,496,902 | INTRONIC   | G | A | - | - |
| Azgp1   | ENSRNOT00000001801 | 17,497,137 | INTRONIC   | G | A | - | - |
| Azgp1   | ENSRNOT00000001801 | 17,497,266 | INTRONIC   | A | G | - | - |
| Azgp1   | ENSRNOT00000001801 | 17,497,267 | INTRONIC   | G | A | - | - |
| Azgp1   | ENSRNOT00000001801 | 17,497,547 | INTRONIC   | G | A | - | - |
| Azgp1   | ENSRNOT00000001801 | 17,497,560 | INTRONIC   | G | A | - | - |
| Azgp1   | ENSRNOT00000001801 | 17,497,632 | INTRONIC   | T | C | - | - |
| Azgp1   | ENSRNOT00000001801 | 17,497,669 | INTRONIC   | A | C | - | - |
| Azgp1   | ENSRNOT00000001801 | 17,497,748 | INTRONIC   | A | G | - | - |
| Azgp1   | ENSRNOT00000001801 | 17,497,842 | INTRONIC   | A | G | - | - |
| Azgp1   | ENSRNOT00000001801 | 17,497,972 | INTRONIC   | T | A | - | - |
| Azgp1   | ENSRNOT00000001801 | 17,498,698 | 3PRIME_UTR | C | A | - | - |
| Azgp1   | ENSRNOT00000001801 | 17,498,751 | 3PRIME_UTR | G | A | - | - |
| Azgp1   | ENSRNOT00000001801 | 17,498,859 | 3PRIME_UTR | T | C | - | - |
| Azgp1   | ENSRNOT00000001801 | 17,498,983 | DOWNSTREAM | G | A | - | - |
| Azgp1   | ENSRNOT00000001801 | 17,499,381 | DOWNSTREAM | G | A | - | - |
| Azgp1   | ENSRNOT00000001801 | 17,499,684 | DOWNSTREAM | A | G | - | - |
| Azgp1   | ENSRNOT00000001801 | 17,499,769 | DOWNSTREAM | C | G | - | - |
| Azgp1   | ENSRNOT00000001801 | 17,499,858 | DOWNSTREAM | G | A | - | - |
| Azgp1   | ENSRNOT00000001801 | 17,500,244 | DOWNSTREAM | G | T | - | - |
| Azgp1   | ENSRNOT00000001801 | 17,500,521 | DOWNSTREAM | A | G | - | - |
| Azgp1   | ENSRNOT00000001801 | 17,500,563 | DOWNSTREAM | G | A | - | - |
| Azgp1   | ENSRNOT00000001801 | 17,500,988 | DOWNSTREAM | C | T | - | - |
| Azgp1   | ENSRNOT00000001801 | 17,500,991 | DOWNSTREAM | A | G | - | - |
| Azgp1   | ENSRNOT00000001801 | 17,501,032 | DOWNSTREAM | C | T | - | - |
| Azgp1   | ENSRNOT00000001801 | 17,501,209 | DOWNSTREAM | C | T | - | - |
| Azgp1   | ENSRNOT00000001801 | 17,501,421 | DOWNSTREAM | T | C | - | - |
| Azgp1   | ENSRNOT00000001801 | 17,501,570 | DOWNSTREAM | A | G | - | - |
| Azgp1   | ENSRNOT00000001801 | 17,501,719 | DOWNSTREAM | A | C | - | - |
| Azgp1   | ENSRNOT00000001801 | 17,501,744 | DOWNSTREAM | A | G | - | - |
| Azgp1   | ENSRNOT00000001801 | 17,501,788 | DOWNSTREAM | A | G | - | - |
| Azgp1   | ENSRNOT00000001801 | 17,502,132 | DOWNSTREAM | C | T | - | - |
| Azgp1   | ENSRNOT00000001801 | 17,503,332 | DOWNSTREAM | C | T | - | - |
| Azgp1   | ENSRNOT00000001801 | 17,503,373 | DOWNSTREAM | G | T | - | - |
| Azgp1   | ENSRNOT00000001801 | 17,503,469 | DOWNSTREAM | T | G | - | - |
| Azgp1   | ENSRNOT00000001801 | 17,503,519 | DOWNSTREAM | C | T | - | - |
| Azgp1   | ENSRNOT00000001801 | 17,503,742 | DOWNSTREAM | C | T | - | - |
| Azgp1   | ENSRNOT00000001801 | 17,503,765 | DOWNSTREAM | G | T | - | - |
| Azgp1   | ENSRNOT00000001801 | 17,503,861 | DOWNSTREAM | T | G | - | - |
| -       | -                  | 17,504,125 | INTERGENIC | T | A | - | - |
| -       | -                  | 17,504,252 | INTERGENIC | T | C | - | - |
| -       | -                  | 17,504,427 | INTERGENIC | G | T | - | - |
| -       | -                  | 17,513,607 | INTERGENIC | G | A | - | - |
| -       | -                  | 17,513,617 | INTERGENIC | G | A | - | - |
| -       | -                  | 17,513,835 | INTERGENIC | G | A | - | - |
| -       | -                  | 17,514,000 | INTERGENIC | A | G | - | - |
| -       | -                  | 17,514,557 | INTERGENIC | T | C | - | - |
| -       | -                  | 17,515,302 | INTERGENIC | A | G | - | - |
| -       | -                  | 17,515,539 | INTERGENIC | A | G | - | - |
| -       | -                  | 17,515,542 | INTERGENIC | G | A | - | - |
| -       | -                  | 17,515,691 | INTERGENIC | A | G | - | - |
| -       | -                  | 17,516,158 | INTERGENIC | T | G | - | - |
| -       | -                  | 17,516,269 | INTERGENIC | C | G | - | - |
| -       | -                  | 17,516,364 | INTERGENIC | G | A | - | - |
| -       | -                  | 17,516,535 | INTERGENIC | G | C | - | - |
| -       | -                  | 17,516,776 | INTERGENIC | A | G | - | - |
| -       | -                  | 17,516,922 | INTERGENIC | C | G | - | - |
| -       | -                  | 17,517,268 | INTERGENIC | C | G | - | - |
| -       | -                  | 17,517,312 | INTERGENIC | C | G | - | - |
| -       | -                  | 17,521,174 | INTERGENIC | A | G | - | - |
| -       | -                  | 17,522,422 | INTERGENIC | T | C | - | - |
| -       | -                  | 17,524,046 | INTERGENIC | T | C | - | - |
| Zkscan1 | ENSRNOT00000001808 | 17,525,635 | UPSTREAM   | T | C | - | - |
| Zkscan1 | ENSRNOT00000001808 | 17,525,956 | UPSTREAM   | C | G | - | - |
| Zkscan1 | ENSRNOT00000001808 | 17,525,958 | UPSTREAM   | C | G | - | - |
| Zkscan1 | ENSRNOT00000001808 | 17,529,394 | UPSTREAM   | T | C | - | - |
| Zkscan1 | ENSRNOT00000001808 | 17,530,642 | INTRONIC   | C | T | - | - |
| Zkscan1 | ENSRNOT00000001808 | 17,531,466 | INTRONIC   | C | A | - | - |
| Zkscan1 | ENSRNOT00000001808 | 17,531,591 | INTRONIC   | C | T | - | - |
| Zkscan1 | ENSRNOT00000001808 | 17,531,592 | INTRONIC   | G | C | - | - |
| Zkscan1 | ENSRNOT00000001808 | 17,531,935 | INTRONIC   | T | C | - | - |
| Zkscan1 | ENSRNOT00000001808 | 17,532,645 | INTRONIC   | T | C | - | - |
| Zkscan1 | ENSRNOT00000001808 | 17,532,892 | INTRONIC   | A | T | - | - |
| Zkscan1 | ENSRNOT00000001808 | 17,533,155 | INTRONIC   | T | C | - | - |
| Zkscan1 | ENSRNOT00000001808 | 17,534,055 | INTRONIC   | A | G | - | - |
| Zkscan1 | ENSRNOT00000001808 | 17,534,700 | INTRONIC   | G | C | - | - |
| Zkscan1 | ENSRNOT00000001808 | 17,534,715 | INTRONIC   | T | G | - | - |
| Zkscan1 | ENSRNOT00000001808 | 17,534,754 | INTRONIC   | A | G | - | - |
| Zkscan1 | ENSRNOT00000001808 | 17,534,769 | INTRONIC   | T | G | - | - |

|            |                    |            |                       |   |   |   |   |
|------------|--------------------|------------|-----------------------|---|---|---|---|
| Zkscan1    | ENSRNOT00000001808 | 17,534,771 | INTRONIC              | A | G | - | - |
| Zkscan1    | ENSRNOT00000001808 | 17,535,489 | INTRONIC              | A | G | - | - |
| Zkscan1    | ENSRNOT00000001808 | 17,535,787 | INTRONIC              | T | C | - | - |
| Zkscan1    | ENSRNOT00000001808 | 17,535,788 | INTRONIC              | A | G | - | - |
| Zkscan1    | ENSRNOT00000001808 | 17,536,445 | INTRONIC              | A | G | - | - |
| Zkscan1    | ENSRNOT00000001808 | 17,536,616 | INTRONIC              | A | C | - | - |
| Zkscan1    | ENSRNOT00000001808 | 17,536,860 | INTRONIC              | A | T | - | - |
| Zkscan1    | ENSRNOT00000001808 | 17,537,607 | 5PRIME_UTR            | T | C | - | - |
| Zkscan1    | ENSRNOT00000001808 | 17,538,196 | INTRONIC              | T | C | - | - |
| Zkscan1    | ENSRNOT00000001808 | 17,539,923 | INTRONIC              | C | T | - | - |
| Zkscan1    | ENSRNOT00000001808 | 17,540,012 | INTRONIC              | T | C | - | - |
| Zkscan1    | ENSRNOT00000001808 | 17,542,071 | INTRONIC              | A | G | - | - |
| Zkscan1    | ENSRNOT00000001808 | 17,542,692 | INTRONIC              | C | T | - | - |
| Zkscan1    | ENSRNOT00000001808 | 17,543,910 | INTRONIC              | G | A | - | - |
| Zkscan1    | ENSRNOT00000001808 | 17,546,879 | DOWNSTREAM            | C | T | - | - |
| LOC680767  | ENSRNOT0000060096  | 17,553,985 | UPSTREAM              | C | T | - | - |
| LOC680767  | ENSRNOT0000060096  | 17,555,200 | UPSTREAM              | C | A | - | - |
| LOC680767  | ENSRNOT0000060096  | 17,555,226 | UPSTREAM              | G | A | - | - |
| LOC680767  | ENSRNOT0000060096  | 17,555,847 | UPSTREAM              | A | G | - | - |
| LOC680767  | ENSRNOT0000060096  | 17,556,052 | UPSTREAM              | T | C | - | - |
| LOC680767  | ENSRNOT0000060096  | 17,556,168 | UPSTREAM              | A | G | - | - |
| LOC680767  | ENSRNOT0000060096  | 17,556,294 | UPSTREAM              | A | G | - | - |
| LOC680767  | ENSRNOT0000060096  | 17,556,633 | UPSTREAM              | A | G | - | - |
| LOC680767  | ENSRNOT0000060096  | 17,556,885 | UPSTREAM              | C | T | - | - |
| LOC680767  | ENSRNOT0000060096  | 17,557,069 | UPSTREAM              | C | T | - | - |
| Zscan21    | ENSRNOT00000001810 | 17,557,540 | UPSTREAM              | T | C | - | - |
| Zscan21    | ENSRNOT00000001810 | 17,557,572 | UPSTREAM              | G | A | - | - |
| Zscan21    | ENSRNOT00000001810 | 17,558,511 | UPSTREAM              | A | T | - | - |
| Zscan21    | ENSRNOT00000001810 | 17,558,611 | UPSTREAM              | A | G | - | - |
| Zscan21    | ENSRNOT00000001810 | 17,558,638 | UPSTREAM              | T | C | - | - |
| Zscan21    | ENSRNOT00000001810 | 17,559,457 | UPSTREAM              | G | A | - | - |
| Zscan21    | ENSRNOT00000001810 | 17,559,625 | UPSTREAM              | A | G | - | - |
| Zscan21    | ENSRNOT00000001810 | 17,560,206 | UPSTREAM              | T | C | - | - |
| Zscan21    | ENSRNOT00000001810 | 17,560,906 | UPSTREAM              | C | G | - | - |
| Zscan21    | ENSRNOT00000001810 | 17,561,022 | UPSTREAM              | A | G | - | - |
| Zscan21    | ENSRNOT00000001810 | 17,561,039 | UPSTREAM              | G | A | - | - |
| Zscan21    | ENSRNOT00000001810 | 17,561,807 | UPSTREAM              | G | T | - | - |
| Zscan21    | ENSRNOT00000001810 | 17,561,818 | UPSTREAM              | G | T | - | - |
| Zscan21    | ENSRNOT00000001810 | 17,562,774 | INTRONIC              | T | C | - | - |
| Zscan21    | ENSRNOT00000001810 | 17,563,585 | INTRONIC              | G | C | - | - |
| Zscan21    | ENSRNOT00000001810 | 17,563,587 | INTRONIC              | C | G | - | - |
| Zscan21    | ENSRNOT00000001810 | 17,563,695 | INTRONIC              | T | C | - | - |
| Zscan21    | ENSRNOT00000001810 | 17,564,191 | INTRONIC              | C | T | - | - |
| Zscan21    | ENSRNOT00000001810 | 17,564,485 | INTRONIC              | T | C | - | - |
| Zscan21    | ENSRNOT00000001810 | 17,564,822 | INTRONIC              | T | C | - | - |
| Zscan21    | ENSRNOT00000001810 | 17,564,830 | INTRONIC              | T | C | - | - |
| Zscan21    | ENSRNOT00000001810 | 17,564,874 | INTRONIC              | G | C | - | - |
| Zscan21    | ENSRNOT00000001810 | 17,564,912 | INTRONIC              | C | T | - | - |
| Zscan21    | ENSRNOT00000001810 | 17,564,940 | INTRONIC              | G | A | - | - |
| Zscan21    | ENSRNOT00000001810 | 17,565,364 | INTRONIC              | G | T | - | - |
| Zscan21    | ENSRNOT00000001810 | 17,565,381 | INTRONIC              | G | T | - | - |
| Zscan21    | ENSRNOT00000001810 | 17,565,646 | INTRONIC              | G | A | - | - |
| Zscan21    | ENSRNOT00000001810 | 17,566,415 | INTRONIC              | G | T | - | - |
| Zscan21    | ENSRNOT00000001810 | 17,566,715 | INTRONIC              | T | C | - | - |
| Zscan21    | ENSRNOT00000001810 | 17,566,772 | INTRONIC              | A | T | - | - |
| Zscan21    | ENSRNOT00000001810 | 17,567,110 | INTRONIC              | G | C | - | - |
| Zscan21    | ENSRNOT00000001810 | 17,567,224 | INTRONIC              | T | A | - | - |
| Zscan21    | ENSRNOT00000001810 | 17,567,622 | NON_SYNONYMOUS_CODING | A | G | R | G |
| Zscan21    | ENSRNOT00000001810 | 17,571,257 | INTRONIC              | G | A | - | - |
| Zscan21    | ENSRNOT00000001810 | 17,573,610 | INTRONIC              | A | G | - | - |
| Zscan21    | ENSRNOT00000001810 | 17,577,821 | 3PRIME_UTR            | C | T | - | - |
| Zscan21    | ENSRNOT00000001810 | 17,578,262 | DOWNSTREAM            | C | A | - | - |
| Zscan21    | ENSRNOT00000001810 | 17,578,412 | DOWNSTREAM            | C | G | - | - |
| Zscan21    | ENSRNOT00000001810 | 17,578,601 | DOWNSTREAM            | C | T | - | - |
| Zscan21    | ENSRNOT00000001810 | 17,578,987 | DOWNSTREAM            | G | A | - | - |
| Zscan21    | ENSRNOT00000001810 | 17,579,307 | DOWNSTREAM            | T | C | - | - |
| Zscan21    | ENSRNOT00000001810 | 17,580,781 | DOWNSTREAM            | C | T | - | - |
| Zscan21    | ENSRNOT00000001810 | 17,581,195 | DOWNSTREAM            | A | T | - | - |
| Zscan21    | ENSRNOT00000001810 | 17,581,868 | DOWNSTREAM            | A | G | - | - |
| Zscan21    | ENSRNOT00000001810 | 17,581,953 | DOWNSTREAM            | A | T | - | - |
| Zscan21    | ENSRNOT00000001810 | 17,582,397 | DOWNSTREAM            | A | G | - | - |
|            | -                  | 17,583,374 | INTERGENIC            | T | A | - | - |
| D3ZI20_RAT | ENSRNOT00000001815 | 17,584,515 | DOWNSTREAM            | T | C | - | - |
| D3ZI20_RAT | ENSRNOT00000001815 | 17,586,540 | DOWNSTREAM            | A | G | - | - |
| D3ZI20_RAT | ENSRNOT00000001815 | 17,586,827 | DOWNSTREAM            | A | G | - | - |
| D3ZI20_RAT | ENSRNOT00000001815 | 17,587,092 | DOWNSTREAM            | G | A | - | - |
| D3ZI20_RAT | ENSRNOT00000001815 | 17,588,039 | DOWNSTREAM            | T | G | - | - |
| D3ZI20_RAT | ENSRNOT00000001815 | 17,588,210 | DOWNSTREAM            | T | C | - | - |
| D3ZI20_RAT | ENSRNOT00000001815 | 17,588,790 | INTRONIC              | G | A | - | - |
| D3ZI20_RAT | ENSRNOT00000001815 | 17,590,377 | INTRONIC              | C | G | - | - |

|            |                     |            |            |   |   |   |   |
|------------|---------------------|------------|------------|---|---|---|---|
| D3ZI20_RAT | ENSRNOT00000001815  | 17,590,411 | INTRONIC   | A | G | - | - |
| D3ZI20_RAT | ENSRNOT00000001815  | 17,590,420 | INTRONIC   | G | A | - | - |
| D3ZI20_RAT | ENSRNOT00000001815  | 17,590,476 | INTRONIC   | G | A | - | - |
| D3ZI20_RAT | ENSRNOT00000001815  | 17,591,070 | INTRONIC   | T | A | - | - |
| D3ZI20_RAT | ENSRNOT00000001815  | 17,591,071 | INTRONIC   | C | A | - | - |
| D3ZI20_RAT | ENSRNOT00000001815  | 17,592,253 | INTRONIC   | T | C | - | - |
| D3ZI20_RAT | ENSRNOT00000001815  | 17,592,791 | INTRONIC   | T | G | - | - |
| D3ZI20_RAT | ENSRNOT00000001815  | 17,593,646 | INTRONIC   | T | C | - | - |
| D3ZI20_RAT | ENSRNOT00000001815  | 17,593,962 | INTRONIC   | C | T | - | - |
| D3ZI20_RAT | ENSRNOT00000001815  | 17,594,305 | INTRONIC   | C | T | - | - |
| D3ZI20_RAT | ENSRNOT00000001815  | 17,594,506 | INTRONIC   | A | G | - | - |
| D3ZI20_RAT | ENSRNOT00000001815  | 17,594,645 | INTRONIC   | A | G | - | - |
| D3ZI20_RAT | ENSRNOT00000001815  | 17,596,089 | INTRONIC   | C | T | - | - |
| D3ZI20_RAT | ENSRNOT00000001815  | 17,596,133 | INTRONIC   | T | A | - | - |
| D3ZI20_RAT | ENSRNOT00000001815  | 17,596,340 | INTRONIC   | A | C | - | - |
| D3ZI20_RAT | ENSRNOT00000001815  | 17,597,222 | INTRONIC   | A | G | - | - |
| D3ZI20_RAT | ENSRNOT00000001815  | 17,599,649 | UPSTREAM   | T | C | - | - |
| D3ZI20_RAT | ENSRNOT00000001815  | 17,600,587 | UPSTREAM   | G | T | - | - |
| D3ZI20_RAT | ENSRNOT00000001815  | 17,600,779 | UPSTREAM   | T | C | - | - |
| D3ZI20_RAT | ENSRNOT00000001815  | 17,600,836 | UPSTREAM   | A | G | - | - |
| D3ZI20_RAT | ENSRNOT00000001815  | 17,600,848 | UPSTREAM   | A | G | - | - |
| D3ZI20_RAT | ENSRNOT00000001815  | 17,600,967 | UPSTREAM   | A | G | - | - |
| D3ZI20_RAT | ENSRNOT00000001815  | 17,600,981 | UPSTREAM   | C | A | - | - |
| D3ZI20_RAT | ENSRNOT00000001815  | 17,601,027 | UPSTREAM   | G | C | - | - |
| D3ZI20_RAT | ENSRNOT00000001815  | 17,601,103 | UPSTREAM   | C | T | - | - |
| D3ZI20_RAT | ENSRNOT00000001815  | 17,601,122 | UPSTREAM   | G | T | - | - |
| D3ZI20_RAT | ENSRNOT00000001815  | 17,601,149 | UPSTREAM   | G | C | - | - |
| D3ZI20_RAT | ENSRNOT00000001815  | 17,601,162 | UPSTREAM   | A | G | - | - |
| D3ZI20_RAT | ENSRNOT00000001815  | 17,601,492 | UPSTREAM   | G | A | - | - |
| D3ZI20_RAT | ENSRNOT00000001815  | 17,603,060 | UPSTREAM   | G | A | - | - |
| D3ZI20_RAT | ENSRNOT00000001815  | 17,603,691 | UPSTREAM   | A | G | - | - |
| Cops6      | ENSRNOT00000001820  | 17,606,162 | INTRONIC   | C | T | - | - |
| Cops6      | ENSRNOT00000001820  | 17,607,800 | DOWNSTREAM | A | G | - | - |
| Cops6      | ENSRNOT00000001820  | 17,608,118 | DOWNSTREAM | C | G | - | - |
| Cops6      | ENSRNOT00000001820  | 17,608,965 | DOWNSTREAM | T | A | - | - |
| Cops6      | ENSRNOT00000001820  | 17,609,242 | DOWNSTREAM | C | T | - | - |
| Ap4m1      | ENSRNOT00000001827  | 17,612,322 | UPSTREAM   | G | A | - | - |
| Mcm7       | ENSRNOT00000001825  | 17,615,754 | UPSTREAM   | G | A | - | - |
| Mcm7       | ENSRNOT00000001825  | 17,617,968 | UPSTREAM   | T | C | - | - |
| TAF6_RAT   | ENSRNOT00000001829  | 17,620,713 | DOWNSTREAM | T | C | - | - |
| Ap4m1      | ENSRNOT00000001827  | 17,620,940 | 3PRIME_UTR | A | T | - | - |
| Ap4m1      | ENSRNOT00000001827  | 17,621,037 | DOWNSTREAM | C | T | - | - |
| Ap4m1      | ENSRNOT00000001827  | 17,623,483 | DOWNSTREAM | G | A | - | - |
| Ap4m1      | ENSRNOT00000001827  | 17,623,852 | DOWNSTREAM | A | G | - | - |
| TAF6_RAT   | ENSRNOT00000001829  | 17,626,205 | INTRONIC   | C | T | - | - |
| TAF6_RAT   | ENSRNOT00000001829  | 17,627,480 | INTRONIC   | A | T | - | - |
| TAF6_RAT   | ENSRNOT00000001829  | 17,628,467 | INTRONIC   | C | T | - | - |
| TAF6_RAT   | ENSRNOT00000001829  | 17,629,431 | UPSTREAM   | T | A | - | - |
| TAF6_RAT   | ENSRNOT00000001829  | 17,630,408 | UPSTREAM   | T | C | - | - |
| TAF6_RAT   | ENSRNOT00000001829  | 17,630,568 | UPSTREAM   | G | T | - | - |
| TAF6_RAT   | ENSRNOT00000001829  | 17,630,590 | UPSTREAM   | T | G | - | - |
| TAF6_RAT   | ENSRNOT00000001829  | 17,630,592 | UPSTREAM   | G | T | - | - |
| TAF6_RAT   | ENSRNOT00000001829  | 17,631,460 | UPSTREAM   | C | T | - | - |
| Mblac1     | ENSRNOT00000001831  | 17,634,897 | UPSTREAM   | C | T | - | - |
| Mblac1     | ENSRNOT00000001831  | 17,634,899 | UPSTREAM   | C | T | - | - |
| Mblac1     | ENSRNOT00000001831  | 17,635,248 | UPSTREAM   | C | T | - | - |
| Mblac1     | ENSRNOT00000001831  | 17,635,324 | UPSTREAM   | C | T | - | - |
| Mblac1     | ENSRNOT00000001831  | 17,635,373 | UPSTREAM   | G | A | - | - |
| Mblac1     | ENSRNOT00000001831  | 17,635,419 | UPSTREAM   | C | T | - | - |
| Mblac1     | ENSRNOT00000001831  | 17,635,468 | UPSTREAM   | C | T | - | - |
| Mblac1     | ENSRNOT00000001831  | 17,635,786 | UPSTREAM   | C | G | - | - |
| Mblac1     | ENSRNOT00000001831  | 17,635,830 | UPSTREAM   | G | A | - | - |
| Mblac1     | ENSRNOT00000001831  | 17,636,081 | UPSTREAM   | C | A | - | - |
| Mblac1     | ENSRNOT00000001831  | 17,636,187 | UPSTREAM   | G | T | - | - |
| Mblac1     | ENSRNOT00000001831  | 17,636,203 | UPSTREAM   | T | A | - | - |
| Mblac1     | ENSRNOT00000001831  | 17,636,333 | UPSTREAM   | T | C | - | - |
| Mblac1     | ENSRNOT00000001831  | 17,636,465 | UPSTREAM   | G | A | - | - |
| Mblac1     | ENSRNOT00000001831  | 17,636,553 | 5PRIME_UTR | C | T | - | - |
| Cnpy4      | ENSRNOT000000033288 | 17,636,671 | DOWNSTREAM | A | G | - | - |
| Cnpy4      | ENSRNOT000000033288 | 17,636,674 | DOWNSTREAM | G | A | - | - |
| Cnpy4      | ENSRNOT000000033288 | 17,636,772 | DOWNSTREAM | G | A | - | - |
| Mblac1     | ENSRNOT00000001831  | 17,638,556 | DOWNSTREAM | T | A | - | - |
| Mblac1     | ENSRNOT00000001831  | 17,641,277 | DOWNSTREAM | T | C | - | - |
| -          | -                   | 17,644,216 | INTERGENIC | C | T | - | - |
| -          | -                   | 17,644,221 | INTERGENIC | C | T | - | - |
| -          | -                   | 17,645,403 | INTERGENIC | C | T | - | - |
| -          | -                   | 17,647,113 | INTERGENIC | C | T | - | - |
| -          | -                   | 17,647,159 | INTERGENIC | T | C | - | - |
| -          | -                   | 17,647,214 | INTERGENIC | G | C | - | - |
| -          | -                   | 17,647,637 | INTERGENIC | T | C | - | - |

|            |                    |            |                       |   |   |   |   |
|------------|--------------------|------------|-----------------------|---|---|---|---|
|            | -                  | 17,648,094 | INTERGENIC            | G | A | - | - |
|            | -                  | 17,648,169 | INTERGENIC            | T | C | - | - |
|            | -                  | 17,648,208 | INTERGENIC            | C | T | - | - |
|            | -                  | 17,648,708 | INTERGENIC            | T | A | - | - |
|            | -                  | 17,650,919 | INTERGENIC            | A | T | - | - |
|            | -                  | 17,653,287 | INTERGENIC            | T | C | - | - |
|            | -                  | 17,653,291 | INTERGENIC            | G | A | - | - |
|            | -                  | 17,654,477 | INTERGENIC            | T | C | - | - |
|            | -                  | 17,654,814 | INTERGENIC            | C | T | - | - |
|            | -                  | 17,654,815 | INTERGENIC            | T | G | - | - |
|            | -                  | 17,657,118 | INTERGENIC            | T | A | - | - |
| LOC684741  | ENSRNOT00000060048 | 17,659,768 | DOWNSTREAM            | A | T | - | - |
| LOC684741  | ENSRNOT00000060048 | 17,659,777 | DOWNSTREAM            | C | G | - | - |
| LOC684741  | ENSRNOT00000060048 | 17,660,107 | DOWNSTREAM            | G | A | - | - |
| LOC684741  | ENSRNOT00000060048 | 17,661,973 | DOWNSTREAM            | G | A | - | - |
| LOC684741  | ENSRNOT00000060048 | 17,662,170 | DOWNSTREAM            | T | G | - | - |
| LOC684741  | ENSRNOT00000060048 | 17,662,252 | DOWNSTREAM            | A | T | - | - |
| LOC684741  | ENSRNOT00000060048 | 17,662,382 | DOWNSTREAM            | A | T | - | - |
| LOC684741  | ENSRNOT00000060048 | 17,667,939 | INTRONIC              | A | C | - | - |
| D4AAD0_RAT | ENSRNOT00000030161 | 17,686,088 | DOWNSTREAM            | C | T | - | - |
| D4AAD0_RAT | ENSRNOT00000030161 | 17,686,131 | DOWNSTREAM            | A | G | - | - |
| D4AAD0_RAT | ENSRNOT00000030161 | 17,686,132 | DOWNSTREAM            | T | C | - | - |
| D4AAD0_RAT | ENSRNOT00000030161 | 17,686,169 | DOWNSTREAM            | G | T | - | - |
| D4AAD0_RAT | ENSRNOT00000030161 | 17,686,757 | DOWNSTREAM            | A | G | - | - |
| D4AAD0_RAT | ENSRNOT00000030161 | 17,686,797 | DOWNSTREAM            | A | G | - | - |
| D4AAD0_RAT | ENSRNOT00000030161 | 17,686,857 | DOWNSTREAM            | T | G | - | - |
| D4AAD0_RAT | ENSRNOT00000030161 | 17,686,858 | DOWNSTREAM            | C | G | - | - |
| D4AAD0_RAT | ENSRNOT00000030161 | 17,686,911 | DOWNSTREAM            | G | A | - | - |
| D4AAD0_RAT | ENSRNOT00000030161 | 17,687,437 | DOWNSTREAM            | C | T | - | - |
| D4AAD0_RAT | ENSRNOT00000030161 | 17,688,141 | DOWNSTREAM            | G | A | - | - |
| D4AAD0_RAT | ENSRNOT00000030161 | 17,688,168 | DOWNSTREAM            | G | A | - | - |
| D4AAD0_RAT | ENSRNOT00000030161 | 17,688,178 | DOWNSTREAM            | G | A | - | - |
| D4AAD0_RAT | ENSRNOT00000030161 | 17,688,284 | DOWNSTREAM            | A | G | - | - |
| D4AAD0_RAT | ENSRNOT00000030161 | 17,688,321 | DOWNSTREAM            | T | C | - | - |
| D4AAD0_RAT | ENSRNOT00000030161 | 17,690,450 | INTRONIC              | T | C | - | - |
| D4AAD0_RAT | ENSRNOT00000030161 | 17,691,033 | INTRONIC              | A | G | - | - |
| D4AAD0_RAT | ENSRNOT00000030161 | 17,691,072 | INTRONIC              | C | G | - | - |
| D4AAD0_RAT | ENSRNOT00000030161 | 17,692,248 | INTRONIC              | G | A | - | - |
| D4AAD0_RAT | ENSRNOT00000030161 | 17,692,272 | INTRONIC              | G | A | - | - |
| D4AAD0_RAT | ENSRNOT00000030161 | 17,692,278 | INTRONIC              | A | G | - | - |
| D4AAD0_RAT | ENSRNOT00000030161 | 17,692,945 | INTRONIC              | T | C | - | - |
| D4AAD0_RAT | ENSRNOT00000030161 | 17,692,961 | INTRONIC              | G | A | - | - |
| D4AAD0_RAT | ENSRNOT00000030161 | 17,693,016 | INTRONIC              | G | A | - | - |
| D4AAD0_RAT | ENSRNOT00000030161 | 17,693,042 | INTRONIC              | G | A | - | - |
| D4AAD0_RAT | ENSRNOT00000030161 | 17,693,059 | INTRONIC              | T | C | - | - |
| D4AAD0_RAT | ENSRNOT00000030161 | 17,693,211 | INTRONIC              | G | A | - | - |
| D4AAD0_RAT | ENSRNOT00000030161 | 17,696,823 | INTRONIC              | T | C | - | - |
| D4AAD0_RAT | ENSRNOT00000030161 | 17,697,808 | INTRONIC              | C | G | - | - |
| D4AAD0_RAT | ENSRNOT00000030161 | 17,697,810 | INTRONIC              | C | G | - | - |
| D4AAD0_RAT | ENSRNOT00000030161 | 17,699,459 | SYNONYMOUS_CODING     | C | G | - | - |
| D4AAD0_RAT | ENSRNOT00000030161 | 17,703,317 | INTRONIC              | T | G | - | - |
| D4AAD0_RAT | ENSRNOT00000030161 | 17,705,893 | INTRONIC              | C | A | - | - |
| D4AAD0_RAT | ENSRNOT00000030161 | 17,711,219 | UPSTREAM              | G | A | - | - |
| D3ZUN4_RAT | ENSRNOT00000060036 | 17,714,534 | UPSTREAM              | A | T | - | - |
| D3ZUN4_RAT | ENSRNOT00000060036 | 17,714,572 | UPSTREAM              | C | T | - | - |
| D3ZUN4_RAT | ENSRNOT00000060036 | 17,714,581 | UPSTREAM              | G | C | - | - |
| D3ZUN4_RAT | ENSRNOT00000060036 | 17,717,021 | UPSTREAM              | T | C | - | - |
| D3ZUN4_RAT | ENSRNOT00000060036 | 17,719,300 | INTRONIC              | A | G | - | - |
|            | -                  | 17,747,110 | INTERGENIC            | G | A | - | - |
|            | -                  | 17,748,027 | INTERGENIC            | G | C | - | - |
|            | -                  | 17,756,273 | INTERGENIC            | T | C | - | - |
|            | -                  | 17,756,279 | INTERGENIC            | C | A | - | - |
|            | -                  | 17,757,230 | INTERGENIC            | T | G | - | - |
|            | -                  | 17,757,233 | INTERGENIC            | G | T | - | - |
|            | -                  | 17,757,256 | INTERGENIC            | C | T | - | - |
|            | -                  | 17,757,258 | INTERGENIC            | A | G | - | - |
|            | -                  | 17,757,740 | INTERGENIC            | T | G | - | - |
|            | -                  | 17,758,045 | INTERGENIC            | C | T | - | - |
|            | -                  | 17,758,047 | INTERGENIC            | G | A | - | - |
|            | -                  | 17,760,124 | INTERGENIC            | C | T | - | - |
|            | -                  | 17,761,461 | INTERGENIC            | A | C | - | - |
|            | -                  | 17,761,467 | INTERGENIC            | C | A | - | - |
|            | -                  | 17,762,458 | INTERGENIC            | A | G | - | - |
| D3ZUN6_RAT | ENSRNOT00000060035 | 17,770,310 | INTRONIC              | G | A | - | - |
| D3ZUN6_RAT | ENSRNOT00000060035 | 17,773,079 | INTRONIC              | T | C | - | - |
| D3ZUN6_RAT | ENSRNOT00000060035 | 17,773,901 | INTRONIC              | A | G | - | - |
| D3ZUN6_RAT | ENSRNOT00000060035 | 17,775,154 | INTRONIC              | C | A | - | - |
| D3ZUN6_RAT | ENSRNOT00000060035 | 17,775,195 | INTRONIC              | C | A | - | - |
| D3ZUN6_RAT | ENSRNOT00000060035 | 17,775,646 | INTRONIC              | C | A | - | - |
| D3ZUN6_RAT | ENSRNOT00000060035 | 17,776,861 | NON_SYNONYMOUS_CODING | G | A | V | I |



|            |                    |            |                       |   |   |   |   |
|------------|--------------------|------------|-----------------------|---|---|---|---|
| D3ZUN6_RAT | ENSRNOT00000060035 | 17,776,980 | SYNONYMOUS_CODING     | G | C | - | - |
| D3ZUN6_RAT | ENSRNOT00000060035 | 17,777,014 | NON_SYNONYMOUS_CODING | G | A | D | N |
| D3ZUN6_RAT | ENSRNOT00000060035 | 17,777,101 | DOWNSTREAM            | C | T | - | - |
| D3ZUN6_RAT | ENSRNOT00000060035 | 17,777,128 | DOWNSTREAM            | C | G | - | - |
| D3ZUN6_RAT | ENSRNOT00000060035 | 17,777,653 | DOWNSTREAM            | G | A | - | - |
| D3ZUN6_RAT | ENSRNOT00000060035 | 17,778,017 | DOWNSTREAM            | C | T | - | - |
| D3ZUN6_RAT | ENSRNOT00000060035 | 17,778,886 | DOWNSTREAM            | T | C | - | - |
| D3ZUN6_RAT | ENSRNOT00000060035 | 17,779,040 | DOWNSTREAM            | A | G | - | - |
| D3ZUN6_RAT | ENSRNOT00000060035 | 17,779,041 | DOWNSTREAM            | A | G | - | - |
| D3ZUN6_RAT | ENSRNOT00000060035 | 17,779,106 | DOWNSTREAM            | T | C | - | - |
| D3ZUN6_RAT | ENSRNOT00000060035 | 17,779,201 | DOWNSTREAM            | C | T | - | - |
| D3ZUN6_RAT | ENSRNOT00000060035 | 17,779,214 | DOWNSTREAM            | C | T | - | - |
| D3ZUN6_RAT | ENSRNOT00000060035 | 17,779,240 | DOWNSTREAM            | C | T | - | - |
| D3ZUN6_RAT | ENSRNOT00000060035 | 17,780,127 | DOWNSTREAM            | A | G | - | - |
| D3ZUN6_RAT | ENSRNOT00000060035 | 17,780,168 | DOWNSTREAM            | T | G | - | - |
| D3ZUN6_RAT | ENSRNOT00000060035 | 17,780,201 | DOWNSTREAM            | G | A | - | - |
| D3ZUN6_RAT | ENSRNOT00000060035 | 17,780,205 | DOWNSTREAM            | A | G | - | - |
| D3ZUN6_RAT | ENSRNOT00000060035 | 17,780,386 | DOWNSTREAM            | G | A | - | - |
| D3ZUN6_RAT | ENSRNOT00000060035 | 17,780,544 | DOWNSTREAM            | T | A | - | - |
| D3ZUN6_RAT | ENSRNOT00000060035 | 17,781,018 | DOWNSTREAM            | A | G | - | - |
| D3ZUN6_RAT | ENSRNOT00000060035 | 17,781,211 | DOWNSTREAM            | T | C | - | - |
| D3ZUN6_RAT | ENSRNOT00000060035 | 17,781,419 | DOWNSTREAM            | G | T | - | - |
| D3ZUN6_RAT | ENSRNOT00000060035 | 17,782,040 | DOWNSTREAM            | C | T | - | - |
| D3ZUN6_RAT | ENSRNOT00000060035 | 17,782,062 | DOWNSTREAM            | C | T | - | - |
| -          | -                  | 17,782,104 | INTERGENIC            | T | C | - | - |
| -          | -                  | 17,782,417 | INTERGENIC            | T | G | - | - |
| -          | -                  | 17,782,887 | INTERGENIC            | A | G | - | - |
| -          | -                  | 17,782,906 | INTERGENIC            | G | T | - | - |
| -          | -                  | 17,782,927 | INTERGENIC            | C | T | - | - |
| -          | -                  | 17,783,060 | INTERGENIC            | G | T | - | - |
| -          | -                  | 17,783,280 | INTERGENIC            | T | C | - | - |
| -          | -                  | 17,783,390 | INTERGENIC            | C | A | - | - |
| -          | -                  | 17,784,119 | INTERGENIC            | T | A | - | - |
| -          | -                  | 17,784,129 | INTERGENIC            | C | A | - | - |
| -          | -                  | 17,784,182 | INTERGENIC            | A | G | - | - |
| -          | -                  | 17,784,191 | INTERGENIC            | C | G | - | - |
| -          | -                  | 17,784,367 | INTERGENIC            | T | C | - | - |
| -          | -                  | 17,784,427 | INTERGENIC            | A | G | - | - |
| -          | -                  | 17,784,652 | INTERGENIC            | A | G | - | - |
| -          | -                  | 17,784,825 | INTERGENIC            | A | C | - | - |
| -          | -                  | 17,784,883 | INTERGENIC            | C | T | - | - |
| -          | -                  | 17,785,081 | INTERGENIC            | G | C | - | - |
| -          | -                  | 17,785,905 | INTERGENIC            | G | A | - | - |
| -          | -                  | 17,785,935 | INTERGENIC            | A | T | - | - |
| -          | -                  | 17,785,953 | INTERGENIC            | T | C | - | - |
| -          | -                  | 17,786,071 | INTERGENIC            | G | A | - | - |
| -          | -                  | 17,786,343 | INTERGENIC            | C | A | - | - |
| -          | -                  | 17,786,513 | INTERGENIC            | G | A | - | - |
| -          | -                  | 17,786,675 | INTERGENIC            | A | G | - | - |
| -          | -                  | 17,786,968 | INTERGENIC            | C | T | - | - |
| -          | -                  | 17,787,047 | INTERGENIC            | C | T | - | - |
| -          | -                  | 17,787,075 | INTERGENIC            | T | G | - | - |
| -          | -                  | 17,787,132 | INTERGENIC            | T | G | - | - |
| -          | -                  | 17,787,751 | INTERGENIC            | G | T | - | - |
| -          | -                  | 17,787,807 | INTERGENIC            | C | G | - | - |
| -          | -                  | 17,787,947 | INTERGENIC            | G | A | - | - |
| -          | -                  | 17,788,343 | INTERGENIC            | C | T | - | - |
| -          | -                  | 17,788,365 | INTERGENIC            | C | A | - | - |
| -          | -                  | 17,788,397 | INTERGENIC            | T | G | - | - |
| -          | -                  | 17,788,637 | INTERGENIC            | C | A | - | - |
| -          | -                  | 17,788,716 | INTERGENIC            | T | C | - | - |
| -          | -                  | 17,788,720 | INTERGENIC            | G | T | - | - |
| -          | -                  | 17,788,750 | INTERGENIC            | T | C | - | - |
| -          | -                  | 17,789,225 | INTERGENIC            | T | C | - | - |
| -          | -                  | 17,789,270 | INTERGENIC            | A | C | - | - |
| -          | -                  | 17,789,276 | INTERGENIC            | G | A | - | - |
| -          | -                  | 17,789,383 | INTERGENIC            | T | C | - | - |
| -          | -                  | 17,789,642 | INTERGENIC            | T | C | - | - |
| -          | -                  | 17,789,717 | INTERGENIC            | T | A | - | - |
| -          | -                  | 17,789,924 | INTERGENIC            | G | C | - | - |
| -          | -                  | 17,789,976 | INTERGENIC            | G | A | - | - |
| -          | -                  | 17,790,254 | INTERGENIC            | T | G | - | - |
| -          | -                  | 17,790,287 | INTERGENIC            | A | G | - | - |
| -          | -                  | 17,790,383 | INTERGENIC            | C | T | - | - |
| -          | -                  | 17,790,437 | INTERGENIC            | A | G | - | - |
| -          | -                  | 17,790,675 | INTERGENIC            | G | C | - | - |
| -          | -                  | 17,790,798 | INTERGENIC            | T | C | - | - |
| -          | -                  | 17,791,060 | INTERGENIC            | T | C | - | - |
| -          | -                  | 17,791,061 | INTERGENIC            | G | A | - | - |
| -          | -                  | 17,791,251 | INTERGENIC            | C | T | - | - |

|            |                    |            |            |   |   |   |   |
|------------|--------------------|------------|------------|---|---|---|---|
| -          | -                  | 17,791,381 | INTERGENIC | A | T | - | - |
| -          | -                  | 17,791,420 | INTERGENIC | A | T | - | - |
| -          | -                  | 17,791,432 | INTERGENIC | T | A | - | - |
| -          | -                  | 17,791,481 | INTERGENIC | G | C | - | - |
| -          | -                  | 17,791,596 | INTERGENIC | C | T | - | - |
| -          | -                  | 17,792,293 | INTERGENIC | C | T | - | - |
| -          | -                  | 17,792,321 | INTERGENIC | T | C | - | - |
| -          | -                  | 17,792,409 | INTERGENIC | A | T | - | - |
| -          | -                  | 17,792,494 | INTERGENIC | G | T | - | - |
| -          | -                  | 17,792,589 | INTERGENIC | T | C | - | - |
| -          | -                  | 17,792,594 | INTERGENIC | T | A | - | - |
| -          | -                  | 17,792,701 | INTERGENIC | T | C | - | - |
| -          | -                  | 17,792,937 | INTERGENIC | C | T | - | - |
| -          | -                  | 17,792,950 | INTERGENIC | A | C | - | - |
| -          | -                  | 17,792,973 | INTERGENIC | C | G | - | - |
| -          | -                  | 17,792,995 | INTERGENIC | T | C | - | - |
| -          | -                  | 17,793,023 | INTERGENIC | C | G | - | - |
| -          | -                  | 17,793,100 | INTERGENIC | A | C | - | - |
| -          | -                  | 17,793,124 | INTERGENIC | G | A | - | - |
| -          | -                  | 17,793,152 | INTERGENIC | G | A | - | - |
| -          | -                  | 17,793,153 | INTERGENIC | C | T | - | - |
| -          | -                  | 17,793,184 | INTERGENIC | T | C | - | - |
| -          | -                  | 17,793,537 | INTERGENIC | A | T | - | - |
| -          | -                  | 17,793,555 | INTERGENIC | C | T | - | - |
| -          | -                  | 17,793,568 | INTERGENIC | T | C | - | - |
| -          | -                  | 17,793,616 | INTERGENIC | T | C | - | - |
| -          | -                  | 17,793,644 | INTERGENIC | G | C | - | - |
| -          | -                  | 17,793,665 | INTERGENIC | T | C | - | - |
| -          | -                  | 17,793,668 | INTERGENIC | C | G | - | - |
| -          | -                  | 17,793,727 | INTERGENIC | A | C | - | - |
| -          | -                  | 17,793,731 | INTERGENIC | A | G | - | - |
| -          | -                  | 17,793,760 | INTERGENIC | C | G | - | - |
| -          | -                  | 17,793,761 | INTERGENIC | C | A | - | - |
| -          | -                  | 17,793,858 | INTERGENIC | T | G | - | - |
| -          | -                  | 17,793,866 | INTERGENIC | T | C | - | - |
| -          | -                  | 17,793,920 | INTERGENIC | C | T | - | - |
| -          | -                  | 17,794,145 | INTERGENIC | C | A | - | - |
| -          | -                  | 17,794,496 | INTERGENIC | T | A | - | - |
| -          | -                  | 17,794,514 | INTERGENIC | T | C | - | - |
| F1M149_RAT | ENSRNOT00000041745 | 17,794,967 | UPSTREAM   | A | T | - | - |
| F1M149_RAT | ENSRNOT00000041745 | 17,794,996 | UPSTREAM   | A | G | - | - |
| F1M149_RAT | ENSRNOT00000041745 | 17,795,161 | UPSTREAM   | G | T | - | - |
| F1M149_RAT | ENSRNOT00000041745 | 17,795,188 | UPSTREAM   | G | C | - | - |
| F1M149_RAT | ENSRNOT00000041745 | 17,795,233 | UPSTREAM   | A | T | - | - |
| F1M149_RAT | ENSRNOT00000041745 | 17,795,234 | UPSTREAM   | A | T | - | - |
| F1M149_RAT | ENSRNOT00000041745 | 17,795,433 | UPSTREAM   | T | G | - | - |
| F1M149_RAT | ENSRNOT00000041745 | 17,795,440 | UPSTREAM   | A | C | - | - |
| F1M149_RAT | ENSRNOT00000041745 | 17,795,712 | UPSTREAM   | G | A | - | - |
| F1M149_RAT | ENSRNOT00000041745 | 17,795,800 | UPSTREAM   | A | G | - | - |
| F1M149_RAT | ENSRNOT00000041745 | 17,796,052 | UPSTREAM   | C | T | - | - |
| F1M149_RAT | ENSRNOT00000041745 | 17,797,199 | UPSTREAM   | T | C | - | - |
| F1M149_RAT | ENSRNOT00000041745 | 17,797,618 | UPSTREAM   | A | G | - | - |
| F1M149_RAT | ENSRNOT00000041745 | 17,797,675 | UPSTREAM   | A | G | - | - |
| F1M149_RAT | ENSRNOT00000041745 | 17,798,011 | UPSTREAM   | C | T | - | - |
| F1M149_RAT | ENSRNOT00000041745 | 17,798,170 | UPSTREAM   | T | C | - | - |
| F1M149_RAT | ENSRNOT00000041745 | 17,798,205 | UPSTREAM   | C | T | - | - |
| F1M149_RAT | ENSRNOT00000041745 | 17,798,633 | UPSTREAM   | C | T | - | - |
| F1M149_RAT | ENSRNOT00000041745 | 17,798,643 | UPSTREAM   | G | C | - | - |
| F1M149_RAT | ENSRNOT00000041745 | 17,798,674 | UPSTREAM   | T | C | - | - |
| F1M149_RAT | ENSRNOT00000041745 | 17,799,513 | UPSTREAM   | T | G | - | - |
| F1M149_RAT | ENSRNOT00000041745 | 17,800,378 | INTRONIC   | G | T | - | - |
| F1M149_RAT | ENSRNOT00000041745 | 17,800,390 | INTRONIC   | A | T | - | - |
| F1M149_RAT | ENSRNOT00000041745 | 17,800,494 | INTRONIC   | A | G | - | - |
| F1M149_RAT | ENSRNOT00000041745 | 17,800,504 | INTRONIC   | A | G | - | - |
| F1M149_RAT | ENSRNOT00000041745 | 17,800,613 | INTRONIC   | T | C | - | - |
| F1M149_RAT | ENSRNOT00000041745 | 17,800,795 | INTRONIC   | T | C | - | - |
| F1M149_RAT | ENSRNOT00000041745 | 17,800,822 | INTRONIC   | A | T | - | - |
| F1M149_RAT | ENSRNOT00000041745 | 17,801,162 | INTRONIC   | T | C | - | - |
| F1M149_RAT | ENSRNOT00000041745 | 17,801,210 | INTRONIC   | A | C | - | - |
| F1M149_RAT | ENSRNOT00000041745 | 17,801,219 | INTRONIC   | G | T | - | - |
| F1M149_RAT | ENSRNOT00000041745 | 17,801,336 | INTRONIC   | C | T | - | - |
| F1M149_RAT | ENSRNOT00000041745 | 17,801,544 | INTRONIC   | A | G | - | - |
| F1M149_RAT | ENSRNOT00000041745 | 17,801,844 | INTRONIC   | T | C | - | - |
| F1M149_RAT | ENSRNOT00000041745 | 17,801,898 | INTRONIC   | A | C | - | - |
| F1M149_RAT | ENSRNOT00000041745 | 17,801,929 | INTRONIC   | T | C | - | - |
| F1M149_RAT | ENSRNOT00000041745 | 17,801,957 | INTRONIC   | G | A | - | - |
| F1M149_RAT | ENSRNOT00000041745 | 17,802,159 | INTRONIC   | T | G | - | - |
| F1M149_RAT | ENSRNOT00000041745 | 17,802,439 | INTRONIC   | C | T | - | - |
| F1M149_RAT | ENSRNOT00000041745 | 17,802,580 | INTRONIC   | A | G | - | - |
| F1M149_RAT | ENSRNOT00000041745 | 17,802,924 | INTRONIC   | C | T | - | - |

|            |                    |            |                       |   |   |   |   |
|------------|--------------------|------------|-----------------------|---|---|---|---|
| F1M149_RAT | ENSRNOT00000041745 | 17,802,987 | INTRONIC              | T | A | - | - |
| F1M149_RAT | ENSRNOT00000041745 | 17,804,483 | INTRONIC              | G | T | - | - |
| F1M149_RAT | ENSRNOT00000041745 | 17,805,251 | INTRONIC              | A | C | - | - |
| F1M149_RAT | ENSRNOT00000041745 | 17,805,381 | INTRONIC              | C | G | - | - |
| F1M149_RAT | ENSRNOT00000041745 | 17,805,636 | SYNONYMOUS_CODING     | A | G | - | - |
| F1M149_RAT | ENSRNOT00000041745 | 17,805,787 | NON_SYNONYMOUS_CODING | T | C | Y | H |
| F1M149_RAT | ENSRNOT00000041745 | 17,805,858 | SYNONYMOUS_CODING     | A | C | - | - |
| F1M149_RAT | ENSRNOT00000041745 | 17,806,068 | SYNONYMOUS_CODING     | T | C | - | - |
| F1M149_RAT | ENSRNOT00000041745 | 17,806,193 | DOWNSTREAM            | T | C | - | - |
| F1M149_RAT | ENSRNOT00000041745 | 17,806,194 | DOWNSTREAM            | G | T | - | - |
| F1M149_RAT | ENSRNOT00000041745 | 17,806,285 | DOWNSTREAM            | A | G | - | - |
| F1M149_RAT | ENSRNOT00000041745 | 17,806,520 | DOWNSTREAM            | A | G | - | - |
| F1M149_RAT | ENSRNOT00000041745 | 17,806,750 | DOWNSTREAM            | A | C | - | - |
| F1M149_RAT | ENSRNOT00000041745 | 17,806,797 | DOWNSTREAM            | G | A | - | - |
| F1M149_RAT | ENSRNOT00000041745 | 17,806,847 | DOWNSTREAM            | T | C | - | - |
| F1M149_RAT | ENSRNOT00000041745 | 17,806,931 | DOWNSTREAM            | G | A | - | - |
| F1M149_RAT | ENSRNOT00000041745 | 17,806,943 | DOWNSTREAM            | G | A | - | - |
| F1M149_RAT | ENSRNOT00000041745 | 17,806,985 | DOWNSTREAM            | T | A | - | - |
| F1M149_RAT | ENSRNOT00000041745 | 17,807,004 | DOWNSTREAM            | A | C | - | - |
| F1M149_RAT | ENSRNOT00000041745 | 17,807,091 | DOWNSTREAM            | C | T | - | - |
| F1M149_RAT | ENSRNOT00000041745 | 17,807,124 | DOWNSTREAM            | A | C | - | - |
| F1M149_RAT | ENSRNOT00000041745 | 17,807,237 | DOWNSTREAM            | A | G | - | - |
| F1M149_RAT | ENSRNOT00000041745 | 17,808,360 | DOWNSTREAM            | C | T | - | - |
| F1M149_RAT | ENSRNOT00000041745 | 17,808,481 | DOWNSTREAM            | T | C | - | - |
| F1M149_RAT | ENSRNOT00000041745 | 17,809,011 | DOWNSTREAM            | C | G | - | - |
| F1M149_RAT | ENSRNOT00000041745 | 17,809,191 | DOWNSTREAM            | C | T | - | - |
| F1M149_RAT | ENSRNOT00000041745 | 17,809,473 | DOWNSTREAM            | G | A | - | - |
| F1M149_RAT | ENSRNOT00000041745 | 17,809,684 | DOWNSTREAM            | T | C | - | - |
| F1M149_RAT | ENSRNOT00000041745 | 17,809,800 | DOWNSTREAM            | T | C | - | - |
| F1M149_RAT | ENSRNOT00000041745 | 17,809,805 | DOWNSTREAM            | C | A | - | - |
| F1M149_RAT | ENSRNOT00000041745 | 17,809,984 | DOWNSTREAM            | C | T | - | - |
| F1M149_RAT | ENSRNOT00000041745 | 17,810,106 | DOWNSTREAM            | G | C | - | - |
| F1M149_RAT | ENSRNOT00000041745 | 17,810,115 | DOWNSTREAM            | C | A | - | - |
| F1M149_RAT | ENSRNOT00000041745 | 17,810,335 | DOWNSTREAM            | C | G | - | - |
| F1M149_RAT | ENSRNOT00000041745 | 17,810,338 | DOWNSTREAM            | C | G | - | - |
| F1M149_RAT | ENSRNOT00000041745 | 17,810,501 | DOWNSTREAM            | A | G | - | - |
| F1M149_RAT | ENSRNOT00000041745 | 17,810,656 | DOWNSTREAM            | T | C | - | - |
| F1M149_RAT | ENSRNOT00000041745 | 17,810,678 | DOWNSTREAM            | C | T | - | - |
| F1M149_RAT | ENSRNOT00000041745 | 17,810,693 | DOWNSTREAM            | A | G | - | - |
| -          | -                  | 17,811,190 | INTERGENIC            | T | C | - | - |
| -          | -                  | 17,813,649 | INTERGENIC            | C | A | - | - |
| -          | -                  | 17,815,184 | INTERGENIC            | C | G | - | - |
| -          | -                  | 17,815,193 | INTERGENIC            | C | G | - | - |
| -          | -                  | 17,815,266 | INTERGENIC            | G | A | - | - |
| -          | -                  | 17,815,306 | INTERGENIC            | T | G | - | - |
| -          | -                  | 17,815,583 | INTERGENIC            | T | C | - | - |
| -          | -                  | 17,815,651 | INTERGENIC            | C | T | - | - |
| -          | -                  | 17,815,770 | INTERGENIC            | G | T | - | - |
| -          | -                  | 17,815,894 | INTERGENIC            | A | C | - | - |
| -          | -                  | 17,816,090 | INTERGENIC            | G | C | - | - |
| -          | -                  | 17,816,143 | INTERGENIC            | C | T | - | - |
| -          | -                  | 17,816,415 | INTERGENIC            | C | A | - | - |
| -          | -                  | 17,816,631 | INTERGENIC            | A | G | - | - |
| -          | -                  | 17,816,671 | INTERGENIC            | T | C | - | - |
| -          | -                  | 17,816,843 | INTERGENIC            | T | A | - | - |
| -          | -                  | 17,816,901 | INTERGENIC            | G | A | - | - |
| -          | -                  | 17,816,926 | INTERGENIC            | T | G | - | - |
| -          | -                  | 17,816,952 | INTERGENIC            | G | T | - | - |
| -          | -                  | 17,816,998 | INTERGENIC            | A | T | - | - |
| -          | -                  | 17,816,999 | INTERGENIC            | G | C | - | - |
| -          | -                  | 17,817,057 | INTERGENIC            | C | G | - | - |
| -          | -                  | 17,817,125 | INTERGENIC            | A | G | - | - |
| -          | -                  | 17,817,251 | INTERGENIC            | C | A | - | - |
| -          | -                  | 17,817,293 | INTERGENIC            | A | G | - | - |
| -          | -                  | 17,817,482 | INTERGENIC            | A | C | - | - |
| -          | -                  | 17,817,613 | INTERGENIC            | C | T | - | - |
| -          | -                  | 17,817,697 | INTERGENIC            | A | G | - | - |
| -          | -                  | 17,817,821 | INTERGENIC            | C | T | - | - |
| -          | -                  | 17,817,952 | INTERGENIC            | T | G | - | - |
| -          | -                  | 17,818,028 | INTERGENIC            | A | G | - | - |
| -          | -                  | 17,818,072 | INTERGENIC            | T | C | - | - |
| -          | -                  | 17,818,090 | INTERGENIC            | G | C | - | - |
| -          | -                  | 17,818,171 | INTERGENIC            | C | T | - | - |
| -          | -                  | 17,818,317 | INTERGENIC            | G | A | - | - |
| -          | -                  | 17,818,341 | INTERGENIC            | A | C | - | - |
| -          | -                  | 17,818,402 | INTERGENIC            | T | C | - | - |
| -          | -                  | 17,818,445 | INTERGENIC            | G | C | - | - |
| -          | -                  | 17,818,505 | INTERGENIC            | C | A | - | - |
| -          | -                  | 17,818,705 | INTERGENIC            | A | G | - | - |
| -          | -                  | 17,819,295 | INTERGENIC            | A | G | - | - |

|            |                    |            |            |   |   |   |   |
|------------|--------------------|------------|------------|---|---|---|---|
| -          | -                  | 17,819,432 | INTERGENIC | A | G | - | - |
| -          | -                  | 17,819,509 | INTERGENIC | C | T | - | - |
| -          | -                  | 17,819,513 | INTERGENIC | A | G | - | - |
| -          | -                  | 17,819,532 | INTERGENIC | C | G | - | - |
| -          | -                  | 17,819,549 | INTERGENIC | C | G | - | - |
| -          | -                  | 17,819,638 | INTERGENIC | C | G | - | - |
| -          | -                  | 17,819,692 | INTERGENIC | T | C | - | - |
| -          | -                  | 17,819,723 | INTERGENIC | T | C | - | - |
| -          | -                  | 17,819,778 | INTERGENIC | T | A | - | - |
| -          | -                  | 17,820,119 | INTERGENIC | G | T | - | - |
| -          | -                  | 17,820,147 | INTERGENIC | G | C | - | - |
| -          | -                  | 17,820,247 | INTERGENIC | A | G | - | - |
| -          | -                  | 17,820,378 | INTERGENIC | T | A | - | - |
| -          | -                  | 17,820,470 | INTERGENIC | A | G | - | - |
| -          | -                  | 17,820,491 | INTERGENIC | G | A | - | - |
| -          | -                  | 17,820,631 | INTERGENIC | T | G | - | - |
| -          | -                  | 17,820,661 | INTERGENIC | A | T | - | - |
| -          | -                  | 17,820,714 | INTERGENIC | C | A | - | - |
| -          | -                  | 17,820,754 | INTERGENIC | T | C | - | - |
| -          | -                  | 17,820,916 | INTERGENIC | G | A | - | - |
| -          | -                  | 17,821,171 | INTERGENIC | C | A | - | - |
| -          | -                  | 17,821,179 | INTERGENIC | A | T | - | - |
| -          | -                  | 17,821,205 | INTERGENIC | A | G | - | - |
| -          | -                  | 17,821,261 | INTERGENIC | C | T | - | - |
| -          | -                  | 17,821,290 | INTERGENIC | T | C | - | - |
| -          | -                  | 17,821,395 | INTERGENIC | A | C | - | - |
| -          | -                  | 17,821,399 | INTERGENIC | C | T | - | - |
| -          | -                  | 17,821,462 | INTERGENIC | G | A | - | - |
| -          | -                  | 17,821,471 | INTERGENIC | T | G | - | - |
| -          | -                  | 17,821,716 | INTERGENIC | A | T | - | - |
| RGD1562319 | ENSRNOT00000060024 | 17,822,052 | UPSTREAM   | C | T | - | - |
| RGD1562319 | ENSRNOT00000060024 | 17,822,386 | UPSTREAM   | G | A | - | - |
| RGD1562319 | ENSRNOT00000060024 | 17,822,412 | UPSTREAM   | A | C | - | - |
| RGD1562319 | ENSRNOT00000060024 | 17,822,469 | UPSTREAM   | T | C | - | - |
| RGD1562319 | ENSRNOT00000060024 | 17,822,509 | UPSTREAM   | T | G | - | - |
| RGD1562319 | ENSRNOT00000060024 | 17,822,517 | UPSTREAM   | T | C | - | - |
| RGD1562319 | ENSRNOT00000060024 | 17,822,551 | UPSTREAM   | A | G | - | - |
| RGD1562319 | ENSRNOT00000060024 | 17,822,574 | UPSTREAM   | C | G | - | - |
| RGD1562319 | ENSRNOT00000060024 | 17,822,760 | UPSTREAM   | A | T | - | - |
| RGD1562319 | ENSRNOT00000060024 | 17,822,841 | UPSTREAM   | A | G | - | - |
| RGD1562319 | ENSRNOT00000060024 | 17,822,949 | UPSTREAM   | C | G | - | - |
| RGD1562319 | ENSRNOT00000060024 | 17,822,987 | UPSTREAM   | T | C | - | - |
| RGD1562319 | ENSRNOT00000060024 | 17,823,079 | UPSTREAM   | G | T | - | - |
| RGD1562319 | ENSRNOT00000060024 | 17,823,155 | UPSTREAM   | T | C | - | - |
| RGD1562319 | ENSRNOT00000060024 | 17,823,188 | UPSTREAM   | G | C | - | - |
| RGD1562319 | ENSRNOT00000060024 | 17,823,355 | UPSTREAM   | C | T | - | - |
| RGD1562319 | ENSRNOT00000060024 | 17,823,411 | UPSTREAM   | C | T | - | - |
| RGD1562319 | ENSRNOT00000060024 | 17,823,548 | UPSTREAM   | A | G | - | - |
| RGD1562319 | ENSRNOT00000060024 | 17,823,639 | UPSTREAM   | C | T | - | - |
| RGD1562319 | ENSRNOT00000060024 | 17,823,640 | UPSTREAM   | A | G | - | - |
| RGD1562319 | ENSRNOT00000060024 | 17,823,730 | UPSTREAM   | C | A | - | - |
| RGD1562319 | ENSRNOT00000060024 | 17,823,826 | UPSTREAM   | C | T | - | - |
| RGD1562319 | ENSRNOT00000060024 | 17,823,837 | UPSTREAM   | A | G | - | - |
| RGD1562319 | ENSRNOT00000060024 | 17,823,950 | UPSTREAM   | A | G | - | - |
| RGD1562319 | ENSRNOT00000060024 | 17,823,995 | UPSTREAM   | C | G | - | - |
| RGD1562319 | ENSRNOT00000060024 | 17,824,135 | UPSTREAM   | G | A | - | - |
| RGD1562319 | ENSRNOT00000060024 | 17,824,194 | UPSTREAM   | G | C | - | - |
| RGD1562319 | ENSRNOT00000060024 | 17,824,277 | UPSTREAM   | C | T | - | - |
| RGD1562319 | ENSRNOT00000060024 | 17,824,325 | UPSTREAM   | C | A | - | - |
| RGD1562319 | ENSRNOT00000060024 | 17,824,362 | UPSTREAM   | C | G | - | - |
| RGD1562319 | ENSRNOT00000060024 | 17,824,380 | UPSTREAM   | T | C | - | - |
| RGD1562319 | ENSRNOT00000060024 | 17,824,385 | UPSTREAM   | C | T | - | - |
| RGD1562319 | ENSRNOT00000060024 | 17,824,445 | UPSTREAM   | C | T | - | - |
| RGD1562319 | ENSRNOT00000060024 | 17,824,476 | UPSTREAM   | A | T | - | - |
| RGD1562319 | ENSRNOT00000060024 | 17,824,508 | UPSTREAM   | T | C | - | - |
| RGD1562319 | ENSRNOT00000060024 | 17,824,542 | UPSTREAM   | A | C | - | - |
| RGD1562319 | ENSRNOT00000060024 | 17,824,695 | UPSTREAM   | T | C | - | - |
| RGD1562319 | ENSRNOT00000060024 | 17,824,753 | UPSTREAM   | G | T | - | - |
| RGD1562319 | ENSRNOT00000060024 | 17,824,817 | UPSTREAM   | A | G | - | - |
| RGD1562319 | ENSRNOT00000060024 | 17,824,887 | UPSTREAM   | T | G | - | - |
| RGD1562319 | ENSRNOT00000060024 | 17,825,128 | UPSTREAM   | T | C | - | - |
| RGD1562319 | ENSRNOT00000060024 | 17,825,246 | UPSTREAM   | C | T | - | - |
| RGD1562319 | ENSRNOT00000060024 | 17,825,356 | UPSTREAM   | T | A | - | - |
| RGD1562319 | ENSRNOT00000060024 | 17,825,414 | UPSTREAM   | C | T | - | - |
| RGD1562319 | ENSRNOT00000060024 | 17,825,443 | UPSTREAM   | G | A | - | - |
| RGD1562319 | ENSRNOT00000060024 | 17,825,527 | UPSTREAM   | A | T | - | - |
| RGD1562319 | ENSRNOT00000060024 | 17,825,653 | UPSTREAM   | C | T | - | - |
| RGD1562319 | ENSRNOT00000060024 | 17,825,728 | UPSTREAM   | C | T | - | - |
| RGD1562319 | ENSRNOT00000060024 | 17,825,876 | UPSTREAM   | A | G | - | - |
| RGD1562319 | ENSRNOT00000060024 | 17,826,191 | UPSTREAM   | A | G | - | - |

|            |                    |            |                       |   |   |   |   |
|------------|--------------------|------------|-----------------------|---|---|---|---|
| RGD1562319 | ENSRNOT00000060024 | 17,826,225 | UPSTREAM              | G | A | - | - |
| RGD1562319 | ENSRNOT00000060024 | 17,826,251 | UPSTREAM              | T | G | - | - |
| RGD1562319 | ENSRNOT00000060024 | 17,826,472 | UPSTREAM              | A | C | - | - |
| RGD1562319 | ENSRNOT00000060024 | 17,826,538 | UPSTREAM              | A | C | - | - |
| RGD1562319 | ENSRNOT00000060024 | 17,826,566 | UPSTREAM              | A | T | - | - |
| RGD1562319 | ENSRNOT00000060024 | 17,826,743 | UPSTREAM              | T | C | - | - |
| RGD1562319 | ENSRNOT00000060024 | 17,826,831 | UPSTREAM              | G | T | - | - |
| RGD1562319 | ENSRNOT00000060024 | 17,826,963 | UPSTREAM              | T | C | - | - |
| RGD1562319 | ENSRNOT00000060024 | 17,826,967 | UPSTREAM              | G | T | - | - |
| RGD1562319 | ENSRNOT00000060024 | 17,827,394 | NON_SYNONYMOUS_CODING | G | T | E | D |
| RGD1562319 | ENSRNOT00000060024 | 17,827,470 | SYNONYMOUS_CODING     | A | C | - | - |
| RGD1562319 | ENSRNOT00000060025 | 17,827,755 | INTRONIC              | C | G | - | - |
| RGD1562319 | ENSRNOT00000060024 | 17,827,845 | INTRONIC              | A | T | - | - |
| RGD1562319 | ENSRNOT00000060024 | 17,827,971 | INTRONIC              | T | C | - | - |
| RGD1562319 | ENSRNOT00000060024 | 17,828,124 | INTRONIC              | T | C | - | - |
| RGD1562319 | ENSRNOT00000060024 | 17,828,203 | INTRONIC              | C | T | - | - |
| RGD1562319 | ENSRNOT00000060024 | 17,828,314 | INTRONIC              | G | C | - | - |
| RGD1562319 | ENSRNOT00000060024 | 17,828,358 | INTRONIC              | C | T | - | - |
| RGD1562319 | ENSRNOT00000060024 | 17,828,378 | INTRONIC              | C | T | - | - |
| RGD1562319 | ENSRNOT00000060024 | 17,828,506 | INTRONIC              | A | G | - | - |
| RGD1562319 | ENSRNOT00000060024 | 17,828,545 | INTRONIC              | T | C | - | - |
| RGD1562319 | ENSRNOT00000060024 | 17,828,716 | INTRONIC              | C | G | - | - |
| RGD1562319 | ENSRNOT00000060025 | 17,828,839 | INTRONIC              | A | G | - | - |
| RGD1562319 | ENSRNOT00000060025 | 17,828,854 | INTRONIC              | C | T | - | - |
| RGD1562319 | ENSRNOT00000060024 | 17,828,916 | INTRONIC              | G | A | - | - |
| RGD1562319 | ENSRNOT00000060024 | 17,828,933 | INTRONIC              | G | A | - | - |
| RGD1562319 | ENSRNOT00000060024 | 17,828,970 | INTRONIC              | C | A | - | - |
| RGD1562319 | ENSRNOT00000060024 | 17,829,114 | INTRONIC              | C | T | - | - |
| RGD1562319 | ENSRNOT00000060024 | 17,829,304 | INTRONIC              | G | T | - | - |
| RGD1562319 | ENSRNOT00000060024 | 17,829,457 | INTRONIC              | A | C | - | - |
| RGD1562319 | ENSRNOT00000060024 | 17,829,623 | INTRONIC              | T | C | - | - |
| RGD1562319 | ENSRNOT00000060024 | 17,829,718 | INTRONIC              | T | G | - | - |
| RGD1562319 | ENSRNOT00000060024 | 17,829,956 | INTRONIC              | G | A | - | - |
| RGD1562319 | ENSRNOT00000060024 | 17,830,081 | INTRONIC              | G | C | - | - |
| RGD1562319 | ENSRNOT00000060024 | 17,830,105 | INTRONIC              | G | T | - | - |
| RGD1562319 | ENSRNOT00000060024 | 17,830,162 | INTRONIC              | G | A | - | - |
| RGD1562319 | ENSRNOT00000060024 | 17,830,208 | INTRONIC              | G | T | - | - |
| RGD1562319 | ENSRNOT00000060024 | 17,830,253 | INTRONIC              | T | C | - | - |
| RGD1562319 | ENSRNOT00000060024 | 17,830,304 | INTRONIC              | T | C | - | - |
| RGD1562319 | ENSRNOT00000060024 | 17,830,309 | INTRONIC              | A | T | - | - |
| RGD1562319 | ENSRNOT00000060024 | 17,830,334 | INTRONIC              | G | C | - | - |
| RGD1562319 | ENSRNOT00000060024 | 17,830,357 | INTRONIC              | T | G | - | - |
| RGD1562319 | ENSRNOT00000060024 | 17,830,390 | INTRONIC              | A | C | - | - |
| RGD1562319 | ENSRNOT00000060024 | 17,830,570 | INTRONIC              | T | C | - | - |
| RGD1562319 | ENSRNOT00000060024 | 17,830,583 | INTRONIC              | A | G | - | - |
| RGD1562319 | ENSRNOT00000060024 | 17,830,681 | INTRONIC              | A | G | - | - |
| RGD1562319 | ENSRNOT00000060024 | 17,830,687 | INTRONIC              | C | G | - | - |
| RGD1562319 | ENSRNOT00000060024 | 17,830,709 | INTRONIC              | T | C | - | - |
| RGD1562319 | ENSRNOT00000060024 | 17,830,743 | INTRONIC              | A | G | - | - |
| RGD1562319 | ENSRNOT00000060024 | 17,830,765 | INTRONIC              | T | C | - | - |
| RGD1562319 | ENSRNOT00000060024 | 17,830,941 | INTRONIC              | G | C | - | - |
| RGD1562319 | ENSRNOT00000060024 | 17,830,945 | INTRONIC              | G | C | - | - |
| RGD1562319 | ENSRNOT00000060024 | 17,830,980 | INTRONIC              | G | A | - | - |
| RGD1562319 | ENSRNOT00000060024 | 17,831,060 | INTRONIC              | C | A | - | - |
| RGD1562319 | ENSRNOT00000060024 | 17,831,095 | INTRONIC              | T | A | - | - |
| RGD1562319 | ENSRNOT00000060024 | 17,831,115 | INTRONIC              | A | C | - | - |
| RGD1562319 | ENSRNOT00000060024 | 17,831,216 | INTRONIC              | C | T | - | - |
| RGD1562319 | ENSRNOT00000060024 | 17,831,259 | SPLICE_SITE,INTRONIC  | C | T | - | - |
| RGD1562319 | ENSRNOT00000060024 | 17,831,275 | NON_SYNONYMOUS_CODING | T | G | S | A |
| RGD1562319 | ENSRNOT00000060024 | 17,831,552 | INTRONIC              | A | C | - | - |
| RGD1562319 | ENSRNOT00000060024 | 17,831,619 | INTRONIC              | T | G | - | - |
| RGD1562319 | ENSRNOT00000060024 | 17,831,669 | INTRONIC              | G | T | - | - |
| RGD1562319 | ENSRNOT00000060024 | 17,832,202 | INTRONIC              | C | T | - | - |
| RGD1562319 | ENSRNOT00000060024 | 17,832,273 | INTRONIC              | G | A | - | - |
| RGD1562319 | ENSRNOT00000060024 | 17,832,325 | INTRONIC              | A | T | - | - |
| RGD1562319 | ENSRNOT00000060024 | 17,832,489 | INTRONIC              | T | C | - | - |
| RGD1562319 | ENSRNOT00000060024 | 17,832,575 | INTRONIC              | C | T | - | - |
| RGD1562319 | ENSRNOT00000060024 | 17,832,641 | INTRONIC              | A | G | - | - |
| RGD1562319 | ENSRNOT00000060024 | 17,832,650 | INTRONIC              | T | C | - | - |
| RGD1562319 | ENSRNOT00000060024 | 17,832,778 | SPLICE_SITE,INTRONIC  | T | C | - | - |
| RGD1562319 | ENSRNOT00000060024 | 17,832,858 | SYNONYMOUS_CODING     | G | C | - | - |
| RGD1562319 | ENSRNOT00000060024 | 17,832,999 | SYNONYMOUS_CODING     | C | T | - | - |
| RGD1562319 | ENSRNOT00000060024 | 17,833,026 | SYNONYMOUS_CODING     | C | T | - | - |
| RGD1562319 | ENSRNOT00000060024 | 17,833,036 | NON_SYNONYMOUS_CODING | G | A | A | T |
| RGD1562319 | ENSRNOT00000060024 | 17,833,260 | SYNONYMOUS_CODING     | G | A | - | - |
| RGD1562319 | ENSRNOT00000060024 | 17,833,273 | NON_SYNONYMOUS_CODING | C | T | R | C |
| RGD1562319 | ENSRNOT00000060024 | 17,833,343 | DOWNSTREAM            | A | G | - | - |
| RGD1562319 | ENSRNOT00000060024 | 17,833,349 | DOWNSTREAM            | T | C | - | - |
| RGD1562319 | ENSRNOT00000060024 | 17,833,350 | DOWNSTREAM            | G | T | - | - |
| RGD1562319 | ENSRNOT00000060024 | 17,833,422 | DOWNSTREAM            | T | C | - | - |

|            |                    |            |            |   |   |   |   |
|------------|--------------------|------------|------------|---|---|---|---|
| RGD1562319 | ENSRNOT00000060024 | 17,833,615 | DOWNSTREAM | G | A | - | - |
| RGD1562319 | ENSRNOT00000060024 | 17,833,737 | DOWNSTREAM | C | T | - | - |
| RGD1562319 | ENSRNOT00000060024 | 17,833,837 | DOWNSTREAM | G | T | - | - |
| RGD1562319 | ENSRNOT00000060024 | 17,833,869 | DOWNSTREAM | G | C | - | - |
| RGD1562319 | ENSRNOT00000060024 | 17,834,065 | DOWNSTREAM | G | A | - | - |
| RGD1562319 | ENSRNOT00000060024 | 17,834,101 | DOWNSTREAM | C | A | - | - |
| RGD1562319 | ENSRNOT00000060024 | 17,834,233 | DOWNSTREAM | G | T | - | - |
| RGD1309735 | ENSRNOT00000029279 | 17,834,314 | UPSTREAM   | G | T | - | - |
| RGD1309735 | ENSRNOT00000029279 | 17,834,483 | UPSTREAM   | G | A | - | - |
| RGD1309735 | ENSRNOT00000029279 | 17,834,484 | UPSTREAM   | G | A | - | - |
| RGD1309735 | ENSRNOT00000029279 | 17,834,924 | UPSTREAM   | A | G | - | - |
| RGD1309735 | ENSRNOT00000029279 | 17,835,042 | UPSTREAM   | C | T | - | - |
| RGD1309735 | ENSRNOT00000029279 | 17,835,391 | UPSTREAM   | G | A | - | - |
| RGD1309735 | ENSRNOT00000029279 | 17,835,721 | UPSTREAM   | A | C | - | - |
| RGD1309735 | ENSRNOT00000029279 | 17,835,722 | UPSTREAM   | T | C | - | - |
| RGD1309735 | ENSRNOT00000029279 | 17,835,764 | UPSTREAM   | A | G | - | - |
| RGD1309735 | ENSRNOT00000029279 | 17,835,909 | UPSTREAM   | G | A | - | - |
| RGD1309735 | ENSRNOT00000029279 | 17,835,925 | UPSTREAM   | A | T | - | - |
| RGD1309735 | ENSRNOT00000029279 | 17,836,108 | UPSTREAM   | C | T | - | - |
| RGD1309735 | ENSRNOT00000029279 | 17,836,145 | UPSTREAM   | C | A | - | - |
| RGD1309735 | ENSRNOT00000029279 | 17,836,442 | UPSTREAM   | T | C | - | - |
| RGD1309735 | ENSRNOT00000029279 | 17,836,536 | UPSTREAM   | G | A | - | - |
| RGD1309735 | ENSRNOT00000029279 | 17,836,565 | UPSTREAM   | T | A | - | - |
| RGD1309735 | ENSRNOT00000029279 | 17,836,631 | UPSTREAM   | G | A | - | - |
| RGD1309735 | ENSRNOT00000029279 | 17,836,634 | UPSTREAM   | T | C | - | - |
| RGD1309735 | ENSRNOT00000029279 | 17,836,712 | UPSTREAM   | A | G | - | - |
| RGD1309735 | ENSRNOT00000029279 | 17,836,727 | UPSTREAM   | T | C | - | - |
| RGD1309735 | ENSRNOT00000029279 | 17,836,792 | UPSTREAM   | G | A | - | - |
| RGD1309735 | ENSRNOT00000029279 | 17,836,795 | UPSTREAM   | C | A | - | - |
| RGD1309735 | ENSRNOT00000029279 | 17,837,083 | UPSTREAM   | C | T | - | - |
| RGD1309735 | ENSRNOT00000029279 | 17,837,155 | UPSTREAM   | G | A | - | - |
| RGD1309735 | ENSRNOT00000029279 | 17,837,247 | UPSTREAM   | C | T | - | - |
| RGD1309735 | ENSRNOT00000029279 | 17,837,595 | UPSTREAM   | G | A | - | - |
| RGD1309735 | ENSRNOT00000029279 | 17,837,621 | UPSTREAM   | T | A | - | - |
| RGD1309735 | ENSRNOT00000029279 | 17,837,942 | UPSTREAM   | T | C | - | - |
| RGD1309735 | ENSRNOT00000029279 | 17,838,212 | UPSTREAM   | A | T | - | - |
| RGD1309735 | ENSRNOT00000029279 | 17,838,376 | UPSTREAM   | C | T | - | - |
| RGD1309735 | ENSRNOT00000029279 | 17,838,406 | UPSTREAM   | T | C | - | - |
| RGD1309735 | ENSRNOT00000029279 | 17,839,692 | INTRONIC   | T | C | - | - |
| RGD1309735 | ENSRNOT00000029279 | 17,840,733 | INTRONIC   | T | A | - | - |
| RGD1309735 | ENSRNOT00000029279 | 17,840,972 | INTRONIC   | C | T | - | - |
| RGD1309735 | ENSRNOT00000029279 | 17,841,013 | INTRONIC   | A | C | - | - |
| RGD1309735 | ENSRNOT00000029279 | 17,841,293 | INTRONIC   | A | G | - | - |
| RGD1309735 | ENSRNOT00000029279 | 17,841,512 | INTRONIC   | G | A | - | - |
| RGD1309735 | ENSRNOT00000029279 | 17,841,823 | INTRONIC   | G | A | - | - |
| RGD1309735 | ENSRNOT00000029279 | 17,841,828 | INTRONIC   | G | A | - | - |
| RGD1309735 | ENSRNOT00000029279 | 17,841,846 | INTRONIC   | C | G | - | - |
| RGD1309735 | ENSRNOT00000029279 | 17,841,933 | INTRONIC   | G | A | - | - |
| RGD1309735 | ENSRNOT00000029279 | 17,841,937 | INTRONIC   | T | C | - | - |
| RGD1309735 | ENSRNOT00000029279 | 17,841,952 | INTRONIC   | C | G | - | - |
| RGD1309735 | ENSRNOT00000029279 | 17,842,214 | INTRONIC   | G | A | - | - |
| RGD1309735 | ENSRNOT00000029279 | 17,842,265 | INTRONIC   | C | T | - | - |
| RGD1309735 | ENSRNOT00000029279 | 17,842,310 | INTRONIC   | C | T | - | - |
| RGD1309735 | ENSRNOT00000029279 | 17,842,319 | INTRONIC   | C | T | - | - |
| RGD1305455 | ENSRNOT00000060020 | 17,842,378 | DOWNSTREAM | A | G | - | - |
| RGD1309735 | ENSRNOT00000029279 | 17,842,937 | 3PRIME_UTR | T | C | - | - |
| RGD1309735 | ENSRNOT00000029279 | 17,843,288 | DOWNSTREAM | G | A | - | - |
| RGD1309735 | ENSRNOT00000029279 | 17,843,478 | DOWNSTREAM | A | G | - | - |
| Gal3st4    | ENSRNOT00000001855 | 17,843,625 | DOWNSTREAM | T | C | - | - |
| Gal3st4    | ENSRNOT00000001855 | 17,843,661 | DOWNSTREAM | A | G | - | - |
| Gal3st4    | ENSRNOT00000001855 | 17,843,725 | DOWNSTREAM | C | G | - | - |
| Gal3st4    | ENSRNOT00000001855 | 17,843,839 | DOWNSTREAM | C | T | - | - |
| Gal3st4    | ENSRNOT00000001855 | 17,843,934 | DOWNSTREAM | A | G | - | - |
| Gal3st4    | ENSRNOT00000001855 | 17,844,177 | DOWNSTREAM | A | C | - | - |
| Gal3st4    | ENSRNOT00000001855 | 17,844,671 | DOWNSTREAM | G | A | - | - |
| Gal3st4    | ENSRNOT00000001855 | 17,844,861 | DOWNSTREAM | C | T | - | - |
| Gal3st4    | ENSRNOT00000001855 | 17,845,183 | DOWNSTREAM | T | C | - | - |
| Gal3st4    | ENSRNOT00000001855 | 17,845,478 | DOWNSTREAM | C | A | - | - |
| Gal3st4    | ENSRNOT00000001855 | 17,850,808 | INTRONIC   | C | G | - | - |
| Gal3st4    | ENSRNOT00000001855 | 17,851,179 | INTRONIC   | G | T | - | - |
| Gal3st4    | ENSRNOT00000001855 | 17,851,670 | INTRONIC   | C | T | - | - |
| Gal3st4    | ENSRNOT00000001855 | 17,853,097 | INTRONIC   | T | G | - | - |
| Gal3st4    | ENSRNOT00000001855 | 17,853,118 | INTRONIC   | A | G | - | - |
| Gal3st4    | ENSRNOT00000001855 | 17,853,342 | INTRONIC   | G | A | - | - |
| Gpc2       | ENSRNOT00000001849 | 17,853,379 | DOWNSTREAM | T | C | - | - |
| Gpc2       | ENSRNOT00000001849 | 17,853,990 | DOWNSTREAM | T | C | - | - |
| Gpc2       | ENSRNOT00000001849 | 17,854,232 | DOWNSTREAM | A | C | - | - |
| Gpc2       | ENSRNOT00000001849 | 17,854,647 | DOWNSTREAM | G | A | - | - |
| Gpc2       | ENSRNOT00000001849 | 17,856,335 | DOWNSTREAM | T | C | - | - |
| Gpc2       | ENSRNOT00000001849 | 17,857,397 | DOWNSTREAM | T | C | - | - |

|         |                    |            |            |   |   |   |   |
|---------|--------------------|------------|------------|---|---|---|---|
| Gpc2    | ENSRNOT00000001849 | 17,858,020 | DOWNSTREAM | C | T | - | - |
| Gpc2    | ENSRNOT00000001849 | 17,858,539 | 3PRIME_UTR | T | C | - | - |
| Gpc2    | ENSRNOT00000001849 | 17,858,567 | 3PRIME_UTR | T | A | - | - |
| Gpc2    | ENSRNOT00000001849 | 17,858,687 | 3PRIME_UTR | C | T | - | - |
| Gpc2    | ENSRNOT00000001849 | 17,858,846 | 3PRIME_UTR | G | C | - | - |
| Gal3st4 | ENSRNOT00000001855 | 17,859,062 | UPSTREAM   | C | G | - | - |
| Gpc2    | ENSRNOT00000001849 | 17,859,284 | INTRONIC   | T | G | - | - |
| Gpc2    | ENSRNOT00000001849 | 17,860,035 | INTRONIC   | T | C | - | - |
| Gpc2    | ENSRNOT00000001849 | 17,861,133 | INTRONIC   | C | A | - | - |
| Gpc2    | ENSRNOT00000001849 | 17,861,711 | INTRONIC   | T | C | - | - |
| Gpc2    | ENSRNOT00000001849 | 17,861,825 | INTRONIC   | A | G | - | - |
| Stag3   | ENSRNOT00000001841 | 17,862,429 | UPSTREAM   | C | T | - | - |
| Stag3   | ENSRNOT00000001841 | 17,862,458 | UPSTREAM   | A | G | - | - |
| Stag3   | ENSRNOT00000001841 | 17,862,849 | UPSTREAM   | T | C | - | - |
| Stag3   | ENSRNOT00000001841 | 17,862,867 | UPSTREAM   | C | G | - | - |
| Stag3   | ENSRNOT00000001841 | 17,863,008 | UPSTREAM   | G | A | - | - |
| Stag3   | ENSRNOT00000001841 | 17,863,328 | UPSTREAM   | A | G | - | - |
| Stag3   | ENSRNOT00000001841 | 17,863,528 | UPSTREAM   | A | G | - | - |
| Stag3   | ENSRNOT00000001841 | 17,863,644 | UPSTREAM   | A | G | - | - |
| Stag3   | ENSRNOT00000001841 | 17,863,800 | UPSTREAM   | A | T | - | - |
| Stag3   | ENSRNOT00000001841 | 17,864,130 | UPSTREAM   | T | A | - | - |
| Stag3   | ENSRNOT00000001841 | 17,864,150 | UPSTREAM   | C | T | - | - |
| Stag3   | ENSRNOT00000001841 | 17,864,225 | UPSTREAM   | C | A | - | - |
| Stag3   | ENSRNOT00000001841 | 17,864,465 | UPSTREAM   | C | T | - | - |
| Stag3   | ENSRNOT00000001841 | 17,864,744 | UPSTREAM   | A | G | - | - |
| Stag3   | ENSRNOT00000001841 | 17,864,893 | UPSTREAM   | C | T | - | - |
| Stag3   | ENSRNOT00000001841 | 17,865,333 | UPSTREAM   | T | C | - | - |
| Stag3   | ENSRNOT00000001841 | 17,866,847 | UPSTREAM   | T | A | - | - |
| Gpc2    | ENSRNOT00000001849 | 17,867,356 | UPSTREAM   | A | G | - | - |
| Stag3   | ENSRNOT00000001841 | 17,868,130 | INTRONIC   | G | A | - | - |
| Stag3   | ENSRNOT00000001841 | 17,869,411 | INTRONIC   | A | G | - | - |
| Stag3   | ENSRNOT00000001841 | 17,871,875 | INTRONIC   | A | G | - | - |
| Stag3   | ENSRNOT00000001841 | 17,872,612 | INTRONIC   | T | C | - | - |
| Stag3   | ENSRNOT00000001841 | 17,874,182 | INTRONIC   | G | A | - | - |
| Stag3   | ENSRNOT00000001841 | 17,875,081 | INTRONIC   | C | A | - | - |
| Stag3   | ENSRNOT00000001841 | 17,875,170 | INTRONIC   | G | T | - | - |
| Stag3   | ENSRNOT00000001841 | 17,875,636 | INTRONIC   | C | T | - | - |
| Stag3   | ENSRNOT00000001841 | 17,876,155 | INTRONIC   | G | A | - | - |
| Stag3   | ENSRNOT00000001841 | 17,882,762 | INTRONIC   | T | C | - | - |
| Stag3   | ENSRNOT00000001841 | 17,884,999 | INTRONIC   | G | A | - | - |
| Stag3   | ENSRNOT00000067399 | 17,885,704 | DOWNSTREAM | T | C | - | - |
| Stag3   | ENSRNOT00000067399 | 17,886,543 | DOWNSTREAM | C | T | - | - |
| Stag3   | ENSRNOT00000001841 | 17,891,546 | INTRONIC   | C | T | - | - |
| Stag3   | ENSRNOT00000001841 | 17,892,461 | INTRONIC   | T | C | - | - |
| Stag3   | ENSRNOT00000001841 | 17,892,828 | INTRONIC   | C | T | - | - |
| Stag3   | ENSRNOT00000001841 | 17,892,834 | INTRONIC   | T | C | - | - |
| Stag3   | ENSRNOT00000001841 | 17,893,809 | INTRONIC   | G | A | - | - |
| Stag3   | ENSRNOT00000001841 | 17,894,102 | INTRONIC   | T | G | - | - |
| Stag3   | ENSRNOT00000001841 | 17,895,406 | INTRONIC   | A | G | - | - |
| Stag3   | ENSRNOT00000001841 | 17,898,400 | DOWNSTREAM | A | T | - | - |
| Stag3   | ENSRNOT00000001841 | 17,898,563 | DOWNSTREAM | C | T | - | - |
| Stag3   | ENSRNOT00000001841 | 17,901,538 | DOWNSTREAM | A | T | - | - |
| -       | -                  | 17,910,510 | INTERGENIC | G | C | - | - |
| -       | -                  | 17,910,621 | INTERGENIC | G | A | - | - |
| -       | -                  | 17,910,799 | INTERGENIC | A | T | - | - |
| -       | -                  | 17,914,378 | INTERGENIC | T | C | - | - |
| -       | -                  | 17,918,010 | INTERGENIC | A | G | - | - |
| -       | -                  | 17,918,283 | INTERGENIC | G | A | - | - |
| -       | -                  | 17,920,023 | INTERGENIC | T | G | - | - |
| -       | -                  | 17,920,036 | INTERGENIC | G | A | - | - |
| -       | -                  | 17,920,879 | INTERGENIC | C | T | - | - |
| -       | -                  | 17,920,993 | INTERGENIC | G | T | - | - |
| -       | -                  | 17,920,994 | INTERGENIC | G | T | - | - |
| -       | -                  | 17,921,016 | INTERGENIC | G | C | - | - |
| -       | -                  | 17,921,094 | INTERGENIC | C | A | - | - |
| -       | -                  | 17,924,873 | INTERGENIC | A | T | - | - |
| -       | -                  | 17,925,430 | INTERGENIC | T | G | - | - |
| -       | -                  | 17,927,890 | INTERGENIC | G | A | - | - |
| -       | -                  | 17,930,288 | INTERGENIC | T | G | - | - |
| -       | -                  | 17,931,017 | INTERGENIC | A | G | - | - |
| -       | -                  | 17,931,093 | INTERGENIC | C | T | - | - |
| -       | -                  | 17,931,954 | INTERGENIC | A | C | - | - |
| -       | -                  | 17,932,427 | INTERGENIC | G | A | - | - |
| -       | -                  | 17,944,269 | INTERGENIC | T | C | - | - |
| -       | -                  | 17,946,002 | INTERGENIC | A | G | - | - |
| -       | -                  | 17,946,028 | INTERGENIC | G | A | - | - |
| -       | -                  | 17,946,030 | INTERGENIC | G | A | - | - |
| -       | -                  | 17,948,160 | INTERGENIC | C | A | - | - |
| -       | -                  | 17,948,304 | INTERGENIC | G | A | - | - |
| -       | -                  | 17,948,449 | INTERGENIC | T | C | - | - |

|            |                    |            |          |   |   |   |   |
|------------|--------------------|------------|----------|---|---|---|---|
| -          | 17,948,754         | INTERGENIC | T        | C | - | - |   |
| -          | 17,948,876         | INTERGENIC | G        | C | - | - |   |
| -          | 17,949,133         | INTERGENIC | C        | T | - | - |   |
| -          | 17,949,190         | INTERGENIC | T        | A | - | - |   |
| -          | 17,949,429         | INTERGENIC | T        | A | - | - |   |
| -          | 17,949,971         | INTERGENIC | C        | T | - | - |   |
| -          | 17,950,303         | INTERGENIC | G        | A | - | - |   |
| -          | 17,951,281         | INTERGENIC | C        | T | - | - |   |
| -          | 17,954,734         | INTERGENIC | G        | A | - | - |   |
| -          | 17,954,870         | INTERGENIC | C        | G | - | - |   |
| -          | 17,955,737         | INTERGENIC | G        | T | - | - |   |
| -          | 17,956,841         | INTERGENIC | G        | C | - | - |   |
| -          | 17,957,974         | INTERGENIC | C        | T | - | - |   |
| -          | 17,958,002         | INTERGENIC | C        | A | - | - |   |
| -          | 17,959,057         | INTERGENIC | T        | C | - | - |   |
| -          | 17,960,394         | INTERGENIC | C        | T | - | - |   |
| -          | 17,961,147         | INTERGENIC | C        | T | - | - |   |
| -          | 17,962,314         | INTERGENIC | A        | C | - | - |   |
| -          | 17,963,512         | INTERGENIC | C        | T | - | - |   |
| -          | 17,964,668         | INTERGENIC | G        | C | - | - |   |
| -          | 17,964,942         | INTERGENIC | G        | A | - | - |   |
| -          | 17,965,017         | INTERGENIC | T        | A | - | - |   |
| -          | 17,965,068         | INTERGENIC | C        | T | - | - |   |
| -          | 17,965,383         | INTERGENIC | G        | A | - | - |   |
| -          | 17,966,981         | INTERGENIC | G        | A | - | - |   |
| -          | 17,967,903         | INTERGENIC | T        | C | - | - |   |
| -          | 17,967,918         | INTERGENIC | T        | G | - | - |   |
| -          | 17,968,848         | INTERGENIC | G        | A | - | - |   |
| -          | 17,969,088         | INTERGENIC | A        | G | - | - |   |
| -          | 17,969,997         | INTERGENIC | C        | A | - | - |   |
| -          | 17,970,126         | INTERGENIC | T        | C | - | - |   |
| -          | 17,970,181         | INTERGENIC | G        | C | - | - |   |
| -          | 17,970,224         | INTERGENIC | A        | G | - | - |   |
| -          | 17,970,330         | INTERGENIC | C        | T | - | - |   |
| -          | 17,970,385         | INTERGENIC | G        | A | - | - |   |
| -          | 17,970,541         | INTERGENIC | G        | C | - | - |   |
| -          | 17,970,726         | INTERGENIC | A        | G | - | - |   |
| -          | 17,970,737         | INTERGENIC | A        | T | - | - |   |
| -          | 17,970,796         | INTERGENIC | C        | T | - | - |   |
| -          | 17,970,862         | INTERGENIC | A        | C | - | - |   |
| -          | 17,970,990         | INTERGENIC | T        | C | - | - |   |
| -          | 17,971,399         | INTERGENIC | T        | A | - | - |   |
| -          | 17,971,407         | INTERGENIC | T        | C | - | - |   |
| -          | 17,971,519         | INTERGENIC | T        | G | - | - |   |
| -          | 17,971,595         | INTERGENIC | G        | T | - | - |   |
| -          | 17,971,890         | INTERGENIC | T        | C | - | - |   |
| -          | 17,971,959         | INTERGENIC | T        | C | - | - |   |
| -          | 17,971,985         | INTERGENIC | T        | A | - | - |   |
| -          | 17,972,218         | INTERGENIC | T        | C | - | - |   |
| -          | 17,972,257         | INTERGENIC | A        | T | - | - |   |
| -          | 17,972,432         | INTERGENIC | G        | T | - | - |   |
| -          | 17,972,462         | INTERGENIC | A        | G | - | - |   |
| -          | 17,972,590         | INTERGENIC | G        | A | - | - |   |
| -          | 17,972,722         | INTERGENIC | T        | G | - | - |   |
| -          | 17,972,736         | INTERGENIC | T        | C | - | - |   |
| -          | 17,972,914         | INTERGENIC | C        | G | - | - |   |
| -          | 17,973,032         | INTERGENIC | T        | G | - | - |   |
| -          | 17,973,092         | INTERGENIC | G        | A | - | - |   |
| -          | 17,973,264         | INTERGENIC | T        | C | - | - |   |
| -          | 17,973,335         | INTERGENIC | C        | T | - | - |   |
| -          | 17,973,584         | INTERGENIC | C        | T | - | - |   |
| -          | 17,973,819         | INTERGENIC | A        | T | - | - |   |
| -          | 17,974,319         | INTERGENIC | C        | T | - | - |   |
| -          | 17,974,346         | INTERGENIC | G        | T | - | - |   |
| -          | 17,974,358         | INTERGENIC | C        | T | - | - |   |
| -          | 17,974,492         | INTERGENIC | A        | C | - | - |   |
| -          | 17,974,721         | INTERGENIC | A        | G | - | - |   |
| -          | 17,974,771         | INTERGENIC | A        | G | - | - |   |
| -          | 17,974,829         | INTERGENIC | G        | A | - | - |   |
| -          | 17,974,853         | INTERGENIC | A        | T | - | - |   |
| -          | 17,974,878         | INTERGENIC | C        | G | - | - |   |
| -          | 17,975,323         | INTERGENIC | C        | T | - | - |   |
| -          | 17,975,361         | INTERGENIC | C        | A | - | - |   |
| -          | 17,975,440         | INTERGENIC | A        | G | - | - |   |
| -          | 17,975,848         | INTERGENIC | G        | A | - | - |   |
| -          | 17,976,595         | INTERGENIC | G        | A | - | - |   |
| RGD1559588 | ENSRNOT00000068035 | 17,976,852 | UPSTREAM | C | G | - | - |
| RGD1559588 | ENSRNOT00000068035 | 17,976,896 | UPSTREAM | A | G | - | - |
| RGD1559588 | ENSRNOT00000068035 | 17,976,901 | UPSTREAM | T | C | - | - |
| RGD1559588 | ENSRNOT00000068035 | 17,977,122 | UPSTREAM | T | A | - | - |



|            |                   |            |                       |   |   |   |   |
|------------|-------------------|------------|-----------------------|---|---|---|---|
| RGD1559588 | ENSRNOT0000068035 | 17,977,285 | UPSTREAM              | T | C | - | - |
| RGD1559588 | ENSRNOT0000068035 | 17,977,598 | UPSTREAM              | A | G | - | - |
| RGD1559588 | ENSRNOT0000068035 | 17,977,712 | UPSTREAM              | C | T | - | - |
| RGD1559588 | ENSRNOT0000068035 | 17,977,738 | UPSTREAM              | G | T | - | - |
| RGD1559588 | ENSRNOT0000068035 | 17,977,792 | UPSTREAM              | T | G | - | - |
| RGD1559588 | ENSRNOT0000068035 | 17,978,084 | UPSTREAM              | G | A | - | - |
| RGD1559588 | ENSRNOT0000068035 | 17,978,284 | UPSTREAM              | T | C | - | - |
| RGD1559588 | ENSRNOT0000068035 | 17,978,432 | UPSTREAM              | T | A | - | - |
| RGD1559588 | ENSRNOT0000068035 | 17,978,593 | UPSTREAM              | G | C | - | - |
| RGD1559588 | ENSRNOT0000068035 | 17,978,617 | UPSTREAM              | C | T | - | - |
| RGD1559588 | ENSRNOT0000068035 | 17,979,293 | UPSTREAM              | T | G | - | - |
| RGD1559588 | ENSRNOT0000068035 | 17,979,355 | UPSTREAM              | T | C | - | - |
| RGD1559588 | ENSRNOT0000068035 | 17,979,408 | UPSTREAM              | C | T | - | - |
| RGD1559588 | ENSRNOT0000068035 | 17,979,427 | UPSTREAM              | A | G | - | - |
| RGD1559588 | ENSRNOT0000068035 | 17,979,457 | UPSTREAM              | T | G | - | - |
| RGD1559588 | ENSRNOT0000068035 | 17,979,502 | UPSTREAM              | A | C | - | - |
| RGD1559588 | ENSRNOT0000068035 | 17,979,507 | UPSTREAM              | A | G | - | - |
| RGD1559588 | ENSRNOT0000068035 | 17,979,529 | UPSTREAM              | A | G | - | - |
| RGD1559588 | ENSRNOT0000068035 | 17,979,551 | UPSTREAM              | A | G | - | - |
| RGD1559588 | ENSRNOT0000068035 | 17,979,594 | UPSTREAM              | T | C | - | - |
| RGD1559588 | ENSRNOT0000068035 | 17,979,597 | UPSTREAM              | T | A | - | - |
| RGD1559588 | ENSRNOT0000068035 | 17,979,663 | UPSTREAM              | T | G | - | - |
| RGD1559588 | ENSRNOT0000068035 | 17,979,673 | UPSTREAM              | G | A | - | - |
| RGD1559588 | ENSRNOT0000068035 | 17,979,699 | UPSTREAM              | G | A | - | - |
| RGD1559588 | ENSRNOT0000068035 | 17,979,706 | UPSTREAM              | G | T | - | - |
| RGD1559588 | ENSRNOT0000068035 | 17,979,937 | UPSTREAM              | T | A | - | - |
| RGD1559588 | ENSRNOT0000068035 | 17,980,042 | UPSTREAM              | T | A | - | - |
| RGD1559588 | ENSRNOT0000068035 | 17,980,044 | UPSTREAM              | T | A | - | - |
| RGD1559588 | ENSRNOT0000068035 | 17,980,362 | UPSTREAM              | T | C | - | - |
| RGD1559588 | ENSRNOT0000068035 | 17,980,434 | UPSTREAM              | G | A | - | - |
| RGD1559588 | ENSRNOT0000068035 | 17,980,658 | UPSTREAM              | A | C | - | - |
| RGD1559588 | ENSRNOT0000068035 | 17,980,745 | UPSTREAM              | C | T | - | - |
| RGD1559588 | ENSRNOT0000068035 | 17,980,897 | UPSTREAM              | T | C | - | - |
| RGD1559588 | ENSRNOT0000068035 | 17,981,238 | UPSTREAM              | C | T | - | - |
| RGD1559588 | ENSRNOT0000068035 | 17,981,301 | UPSTREAM              | A | G | - | - |
| RGD1559588 | ENSRNOT0000068035 | 17,981,302 | UPSTREAM              | T | C | - | - |
| RGD1559588 | ENSRNOT0000068035 | 17,981,342 | UPSTREAM              | A | T | - | - |
| RGD1559588 | ENSRNOT0000068035 | 17,982,494 | NON_SYNONYMOUS_CODING | G | A | A | T |
| RGD1559588 | ENSRNOT0000068035 | 17,982,858 | INTRONIC              | T | C | - | - |
| RGD1559588 | ENSRNOT0000068035 | 17,983,093 | INTRONIC              | A | T | - | - |
| RGD1559588 | ENSRNOT0000068035 | 17,983,094 | INTRONIC              | T | A | - | - |
| RGD1559588 | ENSRNOT0000068035 | 17,983,131 | INTRONIC              | T | G | - | - |
| RGD1559588 | ENSRNOT0000068035 | 17,983,146 | INTRONIC              | C | A | - | - |
| RGD1559588 | ENSRNOT0000068035 | 17,983,178 | INTRONIC              | A | C | - | - |
| RGD1559588 | ENSRNOT0000068035 | 17,983,193 | INTRONIC              | T | C | - | - |
| RGD1559588 | ENSRNOT0000068035 | 17,983,236 | INTRONIC              | G | C | - | - |
| RGD1559588 | ENSRNOT0000068035 | 17,983,323 | INTRONIC              | C | A | - | - |
| RGD1559588 | ENSRNOT0000068035 | 17,983,586 | INTRONIC              | C | T | - | - |
| RGD1559588 | ENSRNOT0000068035 | 17,984,050 | INTRONIC              | A | G | - | - |
| RGD1559588 | ENSRNOT0000068035 | 17,984,432 | INTRONIC              | C | A | - | - |
| RGD1559588 | ENSRNOT0000068035 | 17,984,433 | INTRONIC              | A | G | - | - |
| RGD1559588 | ENSRNOT0000068035 | 17,984,492 | INTRONIC              | C | A | - | - |
| RGD1559588 | ENSRNOT0000068035 | 17,984,686 | INTRONIC              | T | C | - | - |
| RGD1559588 | ENSRNOT0000068035 | 17,984,716 | INTRONIC              | G | A | - | - |
| RGD1559588 | ENSRNOT0000068035 | 17,984,794 | SYNONYMOUS_CODING     | C | T | - | - |
| RGD1559588 | ENSRNOT0000068035 | 17,985,319 | DOWNSTREAM            | A | G | - | - |
| RGD1559588 | ENSRNOT0000068035 | 17,985,374 | DOWNSTREAM            | C | A | - | - |
| RGD1559588 | ENSRNOT0000068035 | 17,985,391 | DOWNSTREAM            | T | A | - | - |
| RGD1559588 | ENSRNOT0000068035 | 17,985,521 | DOWNSTREAM            | C | T | - | - |
| RGD1559588 | ENSRNOT0000068035 | 17,985,535 | DOWNSTREAM            | C | T | - | - |
| RGD1559588 | ENSRNOT0000068035 | 17,985,548 | DOWNSTREAM            | A | G | - | - |
| RGD1559588 | ENSRNOT0000068035 | 17,985,595 | DOWNSTREAM            | C | T | - | - |
| RGD1559588 | ENSRNOT0000068035 | 17,985,703 | DOWNSTREAM            | A | G | - | - |
| RGD1559588 | ENSRNOT0000068035 | 17,986,571 | DOWNSTREAM            | G | C | - | - |
| RGD1559588 | ENSRNOT0000068035 | 17,986,794 | DOWNSTREAM            | G | C | - | - |
| RGD1559588 | ENSRNOT0000068035 | 17,986,849 | DOWNSTREAM            | C | T | - | - |
| RGD1559588 | ENSRNOT0000068035 | 17,987,067 | DOWNSTREAM            | G | A | - | - |
| RGD1559588 | ENSRNOT0000068035 | 17,988,443 | DOWNSTREAM            | G | A | - | - |
| RGD1559588 | ENSRNOT0000068035 | 17,988,518 | DOWNSTREAM            | G | A | - | - |
| RGD1559588 | ENSRNOT0000068035 | 17,989,259 | DOWNSTREAM            | A | T | - | - |
| RGD1559588 | ENSRNOT0000068035 | 17,989,769 | DOWNSTREAM            | C | T | - | - |
| -          | -                 | 17,990,153 | INTERGENIC            | A | T | - | - |
| -          | -                 | 17,990,200 | INTERGENIC            | T | C | - | - |
| -          | -                 | 17,990,270 | INTERGENIC            | C | G | - | - |
| -          | -                 | 17,990,309 | INTERGENIC            | G | C | - | - |
| -          | -                 | 17,990,490 | INTERGENIC            | C | A | - | - |
| -          | -                 | 17,990,611 | INTERGENIC            | T | C | - | - |
| -          | -                 | 17,991,210 | INTERGENIC            | A | G | - | - |
| -          | -                 | 17,991,472 | INTERGENIC            | G | C | - | - |
| -          | -                 | 17,991,707 | INTERGENIC            | T | A | - | - |

|         |                    |            |                       |   |   |   |   |
|---------|--------------------|------------|-----------------------|---|---|---|---|
| -       | -                  | 17,991,748 | INTERGENIC            | G | A | - | - |
| -       | -                  | 17,992,457 | INTERGENIC            | A | G | - | - |
| -       | -                  | 17,992,962 | INTERGENIC            | T | C | - | - |
| -       | -                  | 17,993,045 | INTERGENIC            | T | C | - | - |
| -       | -                  | 17,993,207 | INTERGENIC            | C | T | - | - |
| -       | -                  | 17,994,430 | INTERGENIC            | A | G | - | - |
| -       | -                  | 17,994,820 | INTERGENIC            | G | A | - | - |
| -       | -                  | 17,995,009 | INTERGENIC            | A | G | - | - |
| -       | -                  | 17,995,103 | INTERGENIC            | C | T | - | - |
| -       | -                  | 17,995,448 | INTERGENIC            | G | A | - | - |
| -       | -                  | 17,997,894 | INTERGENIC            | G | C | - | - |
| -       | -                  | 17,999,667 | INTERGENIC            | A | G | - | - |
| -       | -                  | 18,000,669 | INTERGENIC            | G | T | - | - |
| -       | -                  | 18,001,496 | INTERGENIC            | C | T | - | - |
| -       | -                  | 18,001,624 | INTERGENIC            | A | G | - | - |
| -       | -                  | 18,001,720 | INTERGENIC            | A | G | - | - |
| -       | -                  | 18,002,134 | INTERGENIC            | C | G | - | - |
| -       | -                  | 18,002,151 | INTERGENIC            | A | C | - | - |
| -       | -                  | 18,002,177 | INTERGENIC            | C | G | - | - |
| -       | -                  | 18,002,196 | INTERGENIC            | G | C | - | - |
| -       | -                  | 18,014,278 | INTERGENIC            | C | A | - | - |
| -       | -                  | 18,014,322 | INTERGENIC            | G | A | - | - |
| -       | -                  | 18,014,683 | INTERGENIC            | C | T | - | - |
| -       | -                  | 18,015,002 | INTERGENIC            | A | G | - | - |
| Vom2r61 | ENSRNOT00000050200 | 18,017,465 | DOWNSTREAM            | T | C | - | - |
| Vom2r61 | ENSRNOT00000050200 | 18,018,418 | DOWNSTREAM            | T | C | - | - |
| Vom2r61 | ENSRNOT00000050200 | 18,018,439 | DOWNSTREAM            | A | G | - | - |
| Vom2r61 | ENSRNOT00000050200 | 18,018,467 | DOWNSTREAM            | A | C | - | - |
| Vom2r61 | ENSRNOT00000050200 | 18,018,542 | DOWNSTREAM            | C | T | - | - |
| Vom2r61 | ENSRNOT00000050200 | 18,018,627 | DOWNSTREAM            | T | G | - | - |
| Vom2r61 | ENSRNOT00000050200 | 18,018,715 | DOWNSTREAM            | T | C | - | - |
| Vom2r61 | ENSRNOT00000050200 | 18,019,075 | DOWNSTREAM            | G | A | - | - |
| Vom2r61 | ENSRNOT00000050200 | 18,022,080 | NON_SYNONYMOUS_CODING | A | G | I | T |
| Vom2r61 | ENSRNOT00000050200 | 18,022,088 | SYNONYMOUS_CODING     | C | T | - | - |
| Vom2r61 | ENSRNOT00000050200 | 18,023,003 | INTRONIC              | A | C | - | - |
| Vom2r61 | ENSRNOT00000050200 | 18,023,440 | INTRONIC              | G | C | - | - |
| Vom2r61 | ENSRNOT00000050200 | 18,023,539 | INTRONIC              | C | A | - | - |
| Vom2r61 | ENSRNOT00000050200 | 18,023,957 | INTRONIC              | C | G | - | - |
| Vom2r61 | ENSRNOT00000050200 | 18,024,313 | INTRONIC              | T | G | - | - |
| Vom2r61 | ENSRNOT00000050200 | 18,024,325 | INTRONIC              | T | C | - | - |
| Vom2r61 | ENSRNOT00000050200 | 18,024,722 | INTRONIC              | G | A | - | - |
| Vom2r61 | ENSRNOT00000050200 | 18,024,802 | INTRONIC              | A | C | - | - |
| Vom2r61 | ENSRNOT00000050200 | 18,025,716 | INTRONIC              | A | G | - | - |
| Vom2r61 | ENSRNOT00000050200 | 18,025,865 | INTRONIC              | G | A | - | - |
| Vom2r61 | ENSRNOT00000050200 | 18,026,016 | INTRONIC              | A | T | - | - |
| Vom2r61 | ENSRNOT00000050200 | 18,026,545 | INTRONIC              | A | G | - | - |
| Vom2r61 | ENSRNOT00000050200 | 18,026,604 | INTRONIC              | T | C | - | - |
| Vom2r61 | ENSRNOT00000050200 | 18,026,696 | INTRONIC              | G | A | - | - |
| Vom2r61 | ENSRNOT00000050200 | 18,027,208 | INTRONIC              | G | C | - | - |
| Vom2r61 | ENSRNOT00000050200 | 18,027,714 | INTRONIC              | A | G | - | - |
| Vom2r61 | ENSRNOT00000050200 | 18,027,865 | INTRONIC              | G | A | - | - |
| Vom2r61 | ENSRNOT00000050200 | 18,027,953 | INTRONIC              | A | C | - | - |
| Vom2r61 | ENSRNOT00000050200 | 18,028,024 | INTRONIC              | T | G | - | - |
| Vom2r61 | ENSRNOT00000050200 | 18,028,181 | INTRONIC              | C | T | - | - |
| Vom2r61 | ENSRNOT00000050200 | 18,028,475 | INTRONIC              | G | A | - | - |
| Vom2r61 | ENSRNOT00000050200 | 18,028,960 | NON_SYNONYMOUS_CODING | A | T | F | Y |
| Vom2r61 | ENSRNOT00000050200 | 18,028,994 | NON_SYNONYMOUS_CODING | C | T | V | I |
| Vom2r61 | ENSRNOT00000050200 | 18,029,965 | INTRONIC              | G | T | - | - |
| Vom2r61 | ENSRNOT00000050200 | 18,030,007 | INTRONIC              | C | A | - | - |
| Vom2r61 | ENSRNOT00000050200 | 18,030,308 | INTRONIC              | C | T | - | - |
| Vom2r61 | ENSRNOT00000050200 | 18,031,018 | SYNONYMOUS_CODING     | A | G | - | - |
| Vom2r61 | ENSRNOT00000050200 | 18,031,145 | SYNONYMOUS_CODING     | G | A | - | - |
| Vom2r61 | ENSRNOT00000050200 | 18,031,205 | SYNONYMOUS_CODING     | A | C | - | - |
| Vom2r61 | ENSRNOT00000050200 | 18,031,240 | NON_SYNONYMOUS_CODING | A | T | W | R |
| Vom2r61 | ENSRNOT00000050200 | 18,031,315 | SYNONYMOUS_CODING     | G | A | - | - |
| Vom2r61 | ENSRNOT00000050200 | 18,031,867 | INTRONIC              | G | A | - | - |
| Vom2r61 | ENSRNOT00000050200 | 18,032,379 | SYNONYMOUS_CODING     | C | G | - | - |
| Vom2r61 | ENSRNOT00000050200 | 18,033,042 | INTRONIC              | A | C | - | - |
| Vom2r61 | ENSRNOT00000050200 | 18,033,794 | INTRONIC              | C | A | - | - |
| Vom2r61 | ENSRNOT00000050200 | 18,033,892 | INTRONIC              | C | A | - | - |
| Vom2r61 | ENSRNOT00000050200 | 18,034,795 | INTRONIC              | A | C | - | - |
| Vom2r61 | ENSRNOT00000050200 | 18,035,006 | INTRONIC              | T | C | - | - |
| Vom2r61 | ENSRNOT00000050200 | 18,035,015 | INTRONIC              | C | T | - | - |
| Vom2r61 | ENSRNOT00000050200 | 18,035,022 | INTRONIC              | A | G | - | - |
| Vom2r61 | ENSRNOT00000050200 | 18,035,206 | INTRONIC              | T | C | - | - |
| Vom2r61 | ENSRNOT00000050200 | 18,035,207 | INTRONIC              | T | C | - | - |
| Vom2r61 | ENSRNOT00000050200 | 18,035,711 | INTRONIC              | G | T | - | - |
| Vom2r61 | ENSRNOT00000050200 | 18,035,833 | INTRONIC              | C | T | - | - |
| Vom2r61 | ENSRNOT00000050200 | 18,037,010 | INTRONIC              | A | G | - | - |
| Vom2r61 | ENSRNOT00000050200 | 18,037,239 | INTRONIC              | A | G | - | - |

|         |                    |            |                   |   |   |   |   |
|---------|--------------------|------------|-------------------|---|---|---|---|
| Vom2r61 | ENSRNOT00000050200 | 18,037,868 | INTRONIC          | C | T | - | - |
| Vom2r61 | ENSRNOT00000050200 | 18,038,494 | INTRONIC          | C | T | - | - |
| Vom2r61 | ENSRNOT00000050200 | 18,038,795 | INTRONIC          | C | T | - | - |
| Vom2r61 | ENSRNOT00000050200 | 18,038,987 | INTRONIC          | T | C | - | - |
| Vom2r61 | ENSRNOT00000050200 | 18,040,213 | INTRONIC          | T | C | - | - |
| Vom2r61 | ENSRNOT00000050200 | 18,040,215 | INTRONIC          | G | C | - | - |
| Vom2r61 | ENSRNOT00000050200 | 18,040,262 | INTRONIC          | T | C | - | - |
| Vom2r61 | ENSRNOT00000050200 | 18,040,267 | INTRONIC          | T | G | - | - |
| Vom2r61 | ENSRNOT00000050200 | 18,040,298 | INTRONIC          | A | C | - | - |
| Vom2r61 | ENSRNOT00000050200 | 18,040,345 | INTRONIC          | G | C | - | - |
| Vom2r61 | ENSRNOT00000050200 | 18,040,373 | INTRONIC          | G | C | - | - |
| Vom2r61 | ENSRNOT00000050200 | 18,040,415 | INTRONIC          | G | A | - | - |
| Vom2r61 | ENSRNOT00000050200 | 18,041,165 | INTRONIC          | C | A | - | - |
| Vom2r61 | ENSRNOT00000050200 | 18,041,197 | INTRONIC          | A | G | - | - |
| Vom2r61 | ENSRNOT00000050200 | 18,041,260 | INTRONIC          | G | C | - | - |
| Vom2r61 | ENSRNOT00000050200 | 18,042,049 | INTRONIC          | G | C | - | - |
| Vom2r61 | ENSRNOT00000050200 | 18,043,404 | INTRONIC          | A | G | - | - |
| Vom2r61 | ENSRNOT00000050200 | 18,044,406 | INTRONIC          | C | A | - | - |
| Vom2r61 | ENSRNOT00000050200 | 18,045,098 | INTRONIC          | A | C | - | - |
| Vom2r61 | ENSRNOT00000050200 | 18,046,259 | INTRONIC          | A | G | - | - |
| Vom2r61 | ENSRNOT00000050200 | 18,046,695 | INTRONIC          | T | A | - | - |
| Vom2r61 | ENSRNOT00000050200 | 18,046,835 | INTRONIC          | T | C | - | - |
| Vom2r61 | ENSRNOT00000050200 | 18,046,838 | INTRONIC          | G | A | - | - |
| Vom2r61 | ENSRNOT00000050200 | 18,047,150 | INTRONIC          | A | C | - | - |
| Vom2r61 | ENSRNOT00000050200 | 18,047,152 | INTRONIC          | G | A | - | - |
| Vom2r61 | ENSRNOT00000050200 | 18,047,163 | INTRONIC          | G | A | - | - |
| Vom2r61 | ENSRNOT00000050200 | 18,047,467 | INTRONIC          | A | C | - | - |
| Vom2r61 | ENSRNOT00000050200 | 18,048,116 | INTRONIC          | C | G | - | - |
| Vom2r61 | ENSRNOT00000050200 | 18,048,231 | SYNONYMOUS_CODING | A | G | - | - |
| Vom2r61 | ENSRNOT00000050200 | 18,052,472 | UPSTREAM          | A | C | - | - |
| Vom2r61 | ENSRNOT00000050200 | 18,052,477 | UPSTREAM          | T | A | - | - |
| -       | -                  | 18,054,143 | INTERGENIC        | G | A | - | - |
| -       | -                  | 18,054,237 | INTERGENIC        | T | C | - | - |
| -       | -                  | 18,054,452 | INTERGENIC        | A | G | - | - |
| -       | -                  | 18,055,885 | INTERGENIC        | A | G | - | - |
| -       | -                  | 18,056,870 | INTERGENIC        | C | T | - | - |
| -       | -                  | 18,059,662 | INTERGENIC        | G | A | - | - |
| -       | -                  | 18,059,714 | INTERGENIC        | C | T | - | - |
| -       | -                  | 18,059,755 | INTERGENIC        | T | C | - | - |
| -       | -                  | 18,059,761 | INTERGENIC        | G | A | - | - |
| -       | -                  | 18,059,798 | INTERGENIC        | T | C | - | - |
| -       | -                  | 18,059,799 | INTERGENIC        | C | A | - | - |
| -       | -                  | 18,061,567 | INTERGENIC        | T | C | - | - |
| -       | -                  | 18,061,961 | INTERGENIC        | C | T | - | - |
| -       | -                  | 18,061,962 | INTERGENIC        | C | T | - | - |
| -       | -                  | 18,062,129 | INTERGENIC        | T | G | - | - |
| -       | -                  | 18,062,208 | INTERGENIC        | A | G | - | - |
| -       | -                  | 18,063,441 | INTERGENIC        | A | C | - | - |
| -       | -                  | 18,063,442 | INTERGENIC        | G | A | - | - |
| -       | -                  | 18,064,364 | INTERGENIC        | T | A | - | - |
| -       | -                  | 18,064,552 | INTERGENIC        | A | G | - | - |
| -       | -                  | 18,064,594 | INTERGENIC        | T | C | - | - |
| -       | -                  | 18,064,612 | INTERGENIC        | T | A | - | - |
| -       | -                  | 18,064,618 | INTERGENIC        | A | G | - | - |
| -       | -                  | 18,064,740 | INTERGENIC        | C | T | - | - |
| -       | -                  | 18,064,757 | INTERGENIC        | A | G | - | - |
| -       | -                  | 18,066,059 | INTERGENIC        | T | C | - | - |
| -       | -                  | 18,067,188 | INTERGENIC        | A | G | - | - |
| -       | -                  | 18,067,387 | INTERGENIC        | T | C | - | - |
| -       | -                  | 18,067,408 | INTERGENIC        | A | G | - | - |
| -       | -                  | 18,067,713 | INTERGENIC        | G | A | - | - |
| -       | -                  | 18,067,762 | INTERGENIC        | G | A | - | - |
| -       | -                  | 18,067,775 | INTERGENIC        | G | A | - | - |
| -       | -                  | 18,068,323 | INTERGENIC        | A | G | - | - |
| -       | -                  | 18,068,816 | INTERGENIC        | A | G | - | - |
| -       | -                  | 18,069,022 | INTERGENIC        | C | A | - | - |
| -       | -                  | 18,069,894 | INTERGENIC        | A | G | - | - |
| -       | -                  | 18,071,248 | INTERGENIC        | G | A | - | - |
| -       | -                  | 18,071,314 | INTERGENIC        | G | A | - | - |
| -       | -                  | 18,071,757 | INTERGENIC        | T | C | - | - |
| -       | -                  | 18,072,390 | INTERGENIC        | G | C | - | - |
| -       | -                  | 18,072,391 | INTERGENIC        | C | A | - | - |
| -       | -                  | 18,073,255 | INTERGENIC        | A | T | - | - |
| -       | -                  | 18,074,167 | INTERGENIC        | T | C | - | - |
| -       | -                  | 18,074,246 | INTERGENIC        | T | A | - | - |
| -       | -                  | 18,074,447 | INTERGENIC        | T | A | - | - |
| -       | -                  | 18,074,724 | INTERGENIC        | A | G | - | - |
| -       | -                  | 18,074,749 | INTERGENIC        | C | T | - | - |
| -       | -                  | 18,075,157 | INTERGENIC        | T | C | - | - |
| -       | -                  | 18,076,046 | INTERGENIC        | G | T | - | - |

|         |                    |            |                   |   |   |   |   |
|---------|--------------------|------------|-------------------|---|---|---|---|
| -       | -                  | 18,076,508 | INTERGENIC        | A | T | - | - |
| -       | -                  | 18,076,657 | INTERGENIC        | A | G | - | - |
| -       | -                  | 18,078,709 | INTERGENIC        | T | C | - | - |
| -       | -                  | 18,078,716 | INTERGENIC        | C | A | - | - |
| -       | -                  | 18,078,853 | INTERGENIC        | T | C | - | - |
| -       | -                  | 18,079,200 | INTERGENIC        | T | C | - | - |
| -       | -                  | 18,079,517 | INTERGENIC        | G | A | - | - |
| -       | -                  | 18,079,889 | INTERGENIC        | T | A | - | - |
| -       | -                  | 18,080,180 | INTERGENIC        | C | T | - | - |
| -       | -                  | 18,080,608 | INTERGENIC        | C | G | - | - |
| -       | -                  | 18,080,921 | INTERGENIC        | C | G | - | - |
| -       | -                  | 18,081,139 | INTERGENIC        | G | A | - | - |
| -       | -                  | 18,081,728 | INTERGENIC        | A | G | - | - |
| -       | -                  | 18,081,840 | INTERGENIC        | A | G | - | - |
| -       | -                  | 18,082,107 | INTERGENIC        | C | A | - | - |
| -       | -                  | 18,082,108 | INTERGENIC        | C | T | - | - |
| -       | -                  | 18,082,693 | INTERGENIC        | T | C | - | - |
| -       | -                  | 18,083,435 | INTERGENIC        | A | G | - | - |
| -       | -                  | 18,083,514 | INTERGENIC        | A | G | - | - |
| -       | -                  | 18,083,576 | INTERGENIC        | C | T | - | - |
| -       | -                  | 18,084,788 | INTERGENIC        | A | T | - | - |
| -       | -                  | 18,084,882 | INTERGENIC        | C | T | - | - |
| -       | -                  | 18,090,341 | INTERGENIC        | T | C | - | - |
| -       | -                  | 18,090,398 | INTERGENIC        | C | T | - | - |
| -       | -                  | 18,090,431 | INTERGENIC        | C | T | - | - |
| -       | -                  | 18,090,450 | INTERGENIC        | C | A | - | - |
| -       | -                  | 18,090,910 | INTERGENIC        | C | A | - | - |
| -       | -                  | 18,090,911 | INTERGENIC        | A | T | - | - |
| -       | -                  | 18,090,985 | INTERGENIC        | A | G | - | - |
| -       | -                  | 18,091,122 | INTERGENIC        | A | T | - | - |
| -       | -                  | 18,091,165 | INTERGENIC        | A | G | - | - |
| -       | -                  | 18,091,243 | INTERGENIC        | A | G | - | - |
| -       | -                  | 18,091,282 | INTERGENIC        | G | A | - | - |
| -       | -                  | 18,091,618 | INTERGENIC        | A | C | - | - |
| -       | -                  | 18,091,689 | INTERGENIC        | G | A | - | - |
| -       | -                  | 18,091,741 | INTERGENIC        | C | T | - | - |
| -       | -                  | 18,091,798 | INTERGENIC        | A | G | - | - |
| -       | -                  | 18,091,970 | INTERGENIC        | A | G | - | - |
| -       | -                  | 18,091,981 | INTERGENIC        | T | A | - | - |
| -       | -                  | 18,092,957 | INTERGENIC        | A | G | - | - |
| -       | -                  | 18,093,558 | INTERGENIC        | T | C | - | - |
| -       | -                  | 18,093,604 | INTERGENIC        | A | C | - | - |
| -       | -                  | 18,093,837 | INTERGENIC        | T | G | - | - |
| -       | -                  | 18,093,885 | INTERGENIC        | C | T | - | - |
| -       | -                  | 18,094,030 | INTERGENIC        | C | T | - | - |
| -       | -                  | 18,094,137 | INTERGENIC        | T | A | - | - |
| -       | -                  | 18,094,185 | INTERGENIC        | C | A | - | - |
| -       | -                  | 18,094,929 | INTERGENIC        | T | C | - | - |
| -       | -                  | 18,095,730 | INTERGENIC        | C | T | - | - |
| -       | -                  | 18,095,847 | INTERGENIC        | C | T | - | - |
| -       | -                  | 18,096,666 | INTERGENIC        | G | A | - | - |
| -       | -                  | 18,097,997 | INTERGENIC        | G | A | - | - |
| -       | -                  | 18,098,064 | INTERGENIC        | A | G | - | - |
| -       | -                  | 18,098,102 | INTERGENIC        | G | C | - | - |
| -       | -                  | 18,098,279 | INTERGENIC        | G | A | - | - |
| -       | -                  | 18,098,292 | INTERGENIC        | C | T | - | - |
| -       | -                  | 18,098,398 | INTERGENIC        | C | A | - | - |
| -       | -                  | 18,099,266 | INTERGENIC        | C | T | - | - |
| -       | -                  | 18,099,920 | INTERGENIC        | A | G | - | - |
| -       | -                  | 18,102,030 | INTERGENIC        | G | T | - | - |
| Vom2r62 | ENSRNOT00000047610 | 18,102,794 | DOWNSTREAM        | T | C | - | - |
| Vom2r62 | ENSRNOT00000047610 | 18,102,851 | DOWNSTREAM        | A | G | - | - |
| Vom2r62 | ENSRNOT00000047610 | 18,102,900 | DOWNSTREAM        | T | A | - | - |
| Vom2r62 | ENSRNOT00000047610 | 18,102,950 | DOWNSTREAM        | A | G | - | - |
| Vom2r62 | ENSRNOT00000047610 | 18,103,011 | DOWNSTREAM        | C | T | - | - |
| Vom2r62 | ENSRNOT00000047610 | 18,103,102 | DOWNSTREAM        | A | C | - | - |
| Vom2r62 | ENSRNOT00000047610 | 18,103,103 | DOWNSTREAM        | G | C | - | - |
| Vom2r62 | ENSRNOT00000047610 | 18,103,178 | DOWNSTREAM        | C | A | - | - |
| Vom2r62 | ENSRNOT00000047610 | 18,103,200 | DOWNSTREAM        | A | G | - | - |
| Vom2r62 | ENSRNOT00000047610 | 18,103,518 | DOWNSTREAM        | A | C | - | - |
| Vom2r62 | ENSRNOT00000047610 | 18,104,203 | DOWNSTREAM        | T | A | - | - |
| Vom2r62 | ENSRNOT00000047610 | 18,104,244 | DOWNSTREAM        | C | G | - | - |
| Vom2r62 | ENSRNOT00000047610 | 18,105,036 | DOWNSTREAM        | T | C | - | - |
| Vom2r62 | ENSRNOT00000047610 | 18,105,047 | DOWNSTREAM        | T | C | - | - |
| Vom2r62 | ENSRNOT00000047610 | 18,105,064 | DOWNSTREAM        | A | G | - | - |
| Vom2r62 | ENSRNOT00000047610 | 18,105,218 | DOWNSTREAM        | A | G | - | - |
| Vom2r62 | ENSRNOT00000047610 | 18,106,164 | DOWNSTREAM        | G | T | - | - |
| Vom2r62 | ENSRNOT00000047610 | 18,107,027 | DOWNSTREAM        | G | A | - | - |
| Vom2r62 | ENSRNOT00000047610 | 18,107,627 | SYNONYMOUS_CODING | C | T | - | - |
| Vom2r62 | ENSRNOT00000047610 | 18,107,723 | SYNONYMOUS_CODING | A | C | - | - |

|         |                    |            |                       |   |   |   |   |
|---------|--------------------|------------|-----------------------|---|---|---|---|
| Vom2r62 | ENSRNOT00000047610 | 18,109,488 | INTRONIC              | A | G | - | - |
| Vom2r62 | ENSRNOT00000047610 | 18,109,497 | INTRONIC              | T | C | - | - |
| Vom2r62 | ENSRNOT00000047610 | 18,109,641 | INTRONIC              | T | A | - | - |
| Vom2r62 | ENSRNOT00000047610 | 18,109,673 | INTRONIC              | G | A | - | - |
| Vom2r62 | ENSRNOT00000047610 | 18,109,699 | INTRONIC              | T | C | - | - |
| Vom2r62 | ENSRNOT00000047610 | 18,109,733 | INTRONIC              | G | A | - | - |
| Vom2r62 | ENSRNOT00000047610 | 18,109,815 | INTRONIC              | G | A | - | - |
| Vom2r62 | ENSRNOT00000047610 | 18,109,834 | INTRONIC              | T | G | - | - |
| Vom2r62 | ENSRNOT00000047610 | 18,109,860 | INTRONIC              | G | A | - | - |
| Vom2r62 | ENSRNOT00000047610 | 18,109,952 | INTRONIC              | A | G | - | - |
| Vom2r62 | ENSRNOT00000047610 | 18,109,999 | INTRONIC              | A | G | - | - |
| Vom2r62 | ENSRNOT00000047610 | 18,110,385 | INTRONIC              | G | C | - | - |
| Vom2r62 | ENSRNOT00000047610 | 18,110,431 | INTRONIC              | G | A | - | - |
| Vom2r62 | ENSRNOT00000047610 | 18,110,458 | INTRONIC              | A | G | - | - |
| Vom2r62 | ENSRNOT00000047610 | 18,110,486 | INTRONIC              | A | G | - | - |
| Vom2r62 | ENSRNOT00000047610 | 18,110,515 | INTRONIC              | G | A | - | - |
| Vom2r62 | ENSRNOT00000047610 | 18,110,601 | INTRONIC              | T | C | - | - |
| Vom2r62 | ENSRNOT00000047610 | 18,110,734 | INTRONIC              | A | C | - | - |
| Vom2r62 | ENSRNOT00000047610 | 18,111,318 | INTRONIC              | G | C | - | - |
| Vom2r62 | ENSRNOT00000047610 | 18,111,409 | INTRONIC              | A | T | - | - |
| Vom2r62 | ENSRNOT00000047610 | 18,112,030 | INTRONIC              | C | A | - | - |
| Vom2r62 | ENSRNOT00000047610 | 18,112,258 | INTRONIC              | A | G | - | - |
| Vom2r62 | ENSRNOT00000047610 | 18,112,327 | INTRONIC              | C | T | - | - |
| Vom2r62 | ENSRNOT00000047610 | 18,113,301 | INTRONIC              | G | A | - | - |
| Vom2r62 | ENSRNOT00000047610 | 18,113,328 | INTRONIC              | C | T | - | - |
| Vom2r62 | ENSRNOT00000047610 | 18,115,054 | INTRONIC              | G | T | - | - |
| Vom2r62 | ENSRNOT00000047610 | 18,115,060 | INTRONIC              | C | T | - | - |
| Vom2r62 | ENSRNOT00000047610 | 18,115,188 | SYNONYMOUS_CODING     | A | G | - | - |
| Vom2r62 | ENSRNOT00000047610 | 18,115,973 | INTRONIC              | T | C | - | - |
| Vom2r62 | ENSRNOT00000047610 | 18,116,155 | INTRONIC              | T | C | - | - |
| Vom2r62 | ENSRNOT00000047610 | 18,116,948 | NON_SYNONYMOUS_CODING | A | T | M | K |
| Vom2r62 | ENSRNOT00000047610 | 18,117,582 | INTRONIC              | G | C | - | - |
| Vom2r62 | ENSRNOT00000047610 | 18,117,586 | INTRONIC              | C | G | - | - |
| Vom2r62 | ENSRNOT00000047610 | 18,117,590 | INTRONIC              | C | G | - | - |
| Vom2r62 | ENSRNOT00000047610 | 18,118,861 | INTRONIC              | T | C | - | - |
| Vom2r62 | ENSRNOT00000047610 | 18,119,071 | INTRONIC              | G | A | - | - |
| Vom2r62 | ENSRNOT00000047610 | 18,120,381 | INTRONIC              | T | C | - | - |
| Vom2r62 | ENSRNOT00000047610 | 18,120,680 | INTRONIC              | C | G | - | - |
| Vom2r62 | ENSRNOT00000047610 | 18,121,231 | INTRONIC              | T | C | - | - |
| Vom2r62 | ENSRNOT00000047610 | 18,122,911 | INTRONIC              | A | T | - | - |
| Vom2r62 | ENSRNOT00000047610 | 18,123,806 | INTRONIC              | G | A | - | - |
| Vom2r62 | ENSRNOT00000047610 | 18,129,641 | UPSTREAM              | G | C | - | - |
| -       | -                  | 18,130,673 | INTERGENIC            | T | G | - | - |
| -       | -                  | 18,131,110 | INTERGENIC            | G | T | - | - |
| -       | -                  | 18,131,750 | INTERGENIC            | C | G | - | - |
| -       | -                  | 18,136,053 | INTERGENIC            | T | A | - | - |
| -       | -                  | 18,137,551 | INTERGENIC            | G | T | - | - |
| -       | -                  | 18,137,559 | INTERGENIC            | C | T | - | - |
| -       | -                  | 18,137,700 | INTERGENIC            | G | A | - | - |
| -       | -                  | 18,138,111 | INTERGENIC            | A | T | - | - |
| -       | -                  | 18,138,322 | INTERGENIC            | T | A | - | - |
| -       | -                  | 18,138,390 | INTERGENIC            | G | A | - | - |
| -       | -                  | 18,138,477 | INTERGENIC            | C | T | - | - |
| -       | -                  | 18,139,053 | INTERGENIC            | C | T | - | - |
| -       | -                  | 18,139,380 | INTERGENIC            | G | A | - | - |
| -       | -                  | 18,139,535 | INTERGENIC            | C | A | - | - |
| -       | -                  | 18,139,753 | INTERGENIC            | G | A | - | - |
| -       | -                  | 18,139,849 | INTERGENIC            | C | A | - | - |
| -       | -                  | 18,140,703 | INTERGENIC            | G | A | - | - |
| -       | -                  | 18,140,817 | INTERGENIC            | G | A | - | - |
| -       | -                  | 18,142,412 | INTERGENIC            | C | T | - | - |
| -       | -                  | 18,145,482 | INTERGENIC            | A | G | - | - |
| -       | -                  | 18,146,041 | INTERGENIC            | A | T | - | - |
| -       | -                  | 18,146,150 | INTERGENIC            | T | C | - | - |
| -       | -                  | 18,146,370 | INTERGENIC            | G | A | - | - |
| -       | -                  | 18,149,825 | INTERGENIC            | G | T | - | - |
| -       | -                  | 18,149,856 | INTERGENIC            | A | C | - | - |
| -       | -                  | 18,150,563 | INTERGENIC            | C | T | - | - |
| -       | -                  | 18,151,229 | INTERGENIC            | A | G | - | - |
| -       | -                  | 18,153,805 | INTERGENIC            | C | A | - | - |
| -       | -                  | 18,154,237 | INTERGENIC            | A | C | - | - |
| -       | -                  | 18,155,138 | INTERGENIC            | A | C | - | - |
| -       | -                  | 18,156,254 | INTERGENIC            | G | A | - | - |
| -       | -                  | 18,157,383 | INTERGENIC            | A | T | - | - |
| -       | -                  | 18,159,685 | INTERGENIC            | C | A | - | - |
| -       | -                  | 18,159,878 | INTERGENIC            | T | G | - | - |
| -       | -                  | 18,159,931 | INTERGENIC            | A | G | - | - |
| -       | -                  | 18,159,935 | INTERGENIC            | A | G | - | - |
| -       | -                  | 18,160,257 | INTERGENIC            | G | A | - | - |
| -       | -                  | 18,160,428 | INTERGENIC            | T | C | - | - |

|   |            |            |   |   |   |   |
|---|------------|------------|---|---|---|---|
| - | 18,160,467 | INTERGENIC | G | T | - | - |
| - | 18,162,746 | INTERGENIC | C | A | - | - |
| - | 18,163,218 | INTERGENIC | C | T | - | - |
| - | 18,163,556 | INTERGENIC | C | T | - | - |
| - | 18,163,569 | INTERGENIC | G | A | - | - |
| - | 18,163,715 | INTERGENIC | A | T | - | - |
| - | 18,163,899 | INTERGENIC | G | T | - | - |
| - | 18,163,923 | INTERGENIC | C | T | - | - |
| - | 18,163,955 | INTERGENIC | A | T | - | - |
| - | 18,164,522 | INTERGENIC | A | G | - | - |
| - | 18,164,545 | INTERGENIC | T | G | - | - |
| - | 18,166,341 | INTERGENIC | T | C | - | - |
| - | 18,168,330 | INTERGENIC | C | A | - | - |
| - | 18,171,370 | INTERGENIC | A | G | - | - |
| - | 18,171,418 | INTERGENIC | C | T | - | - |
| - | 18,171,431 | INTERGENIC | G | A | - | - |
| - | 18,171,473 | INTERGENIC | T | G | - | - |
| - | 18,171,750 | INTERGENIC | C | T | - | - |
| - | 18,171,837 | INTERGENIC | C | A | - | - |
| - | 18,172,017 | INTERGENIC | T | G | - | - |
| - | 18,172,210 | INTERGENIC | C | A | - | - |
| - | 18,172,256 | INTERGENIC | G | A | - | - |
| - | 18,172,712 | INTERGENIC | C | A | - | - |
| - | 18,173,526 | INTERGENIC | C | T | - | - |
| - | 18,173,577 | INTERGENIC | G | A | - | - |
| - | 18,173,691 | INTERGENIC | T | C | - | - |
| - | 18,173,710 | INTERGENIC | C | A | - | - |
| - | 18,173,855 | INTERGENIC | C | A | - | - |
| - | 18,173,893 | INTERGENIC | A | G | - | - |
| - | 18,174,185 | INTERGENIC | G | T | - | - |
| - | 18,174,705 | INTERGENIC | C | T | - | - |
| - | 18,174,782 | INTERGENIC | G | A | - | - |
| - | 18,174,925 | INTERGENIC | T | G | - | - |
| - | 18,175,651 | INTERGENIC | T | G | - | - |
| - | 18,175,845 | INTERGENIC | G | A | - | - |
| - | 18,175,897 | INTERGENIC | G | A | - | - |
| - | 18,175,954 | INTERGENIC | T | G | - | - |
| - | 18,175,955 | INTERGENIC | C | G | - | - |
| - | 18,176,789 | INTERGENIC | C | T | - | - |
| - | 18,176,791 | INTERGENIC | T | A | - | - |
| - | 18,176,829 | INTERGENIC | G | T | - | - |
| - | 18,176,841 | INTERGENIC | G | A | - | - |
| - | 18,177,403 | INTERGENIC | A | G | - | - |
| - | 18,177,537 | INTERGENIC | A | C | - | - |
| - | 18,177,555 | INTERGENIC | G | T | - | - |
| - | 18,177,695 | INTERGENIC | G | C | - | - |
| - | 18,177,697 | INTERGENIC | G | C | - | - |
| - | 18,177,763 | INTERGENIC | A | T | - | - |
| - | 18,178,549 | INTERGENIC | T | C | - | - |
| - | 18,178,603 | INTERGENIC | G | T | - | - |
| - | 18,179,147 | INTERGENIC | A | T | - | - |
| - | 18,179,406 | INTERGENIC | A | G | - | - |
| - | 18,180,856 | INTERGENIC | G | A | - | - |
| - | 18,181,695 | INTERGENIC | T | C | - | - |
| - | 18,182,690 | INTERGENIC | A | G | - | - |
| - | 18,182,894 | INTERGENIC | G | A | - | - |
| - | 18,183,638 | INTERGENIC | T | A | - | - |
| - | 18,183,722 | INTERGENIC | A | G | - | - |
| - | 18,183,878 | INTERGENIC | A | G | - | - |
| - | 18,184,209 | INTERGENIC | A | G | - | - |
| - | 18,184,374 | INTERGENIC | T | C | - | - |
| - | 18,184,534 | INTERGENIC | A | G | - | - |
| - | 18,184,645 | INTERGENIC | G | T | - | - |
| - | 18,184,684 | INTERGENIC | C | T | - | - |
| - | 18,185,299 | INTERGENIC | G | A | - | - |
| - | 18,185,562 | INTERGENIC | C | T | - | - |
| - | 18,185,662 | INTERGENIC | G | A | - | - |
| - | 18,188,621 | INTERGENIC | T | G | - | - |
| - | 18,189,368 | INTERGENIC | A | T | - | - |
| - | 18,189,404 | INTERGENIC | C | A | - | - |
| - | 18,190,881 | INTERGENIC | T | C | - | - |
| - | 18,191,355 | INTERGENIC | T | C | - | - |
| - | 18,191,386 | INTERGENIC | G | A | - | - |
| - | 18,192,220 | INTERGENIC | A | C | - | - |
| - | 18,192,443 | INTERGENIC | T | A | - | - |
| - | 18,192,654 | INTERGENIC | T | A | - | - |
| - | 18,193,042 | INTERGENIC | A | G | - | - |
| - | 18,193,544 | INTERGENIC | G | C | - | - |
| - | 18,193,552 | INTERGENIC | C | A | - | - |
| - | 18,193,588 | INTERGENIC | T | A | - | - |

|         |                    |            |                       |   |   |   |   |
|---------|--------------------|------------|-----------------------|---|---|---|---|
| -       | -                  | 18,193,617 | INTERGENIC            | C | T | - | - |
| -       | -                  | 18,194,063 | INTERGENIC            | C | T | - | - |
| -       | -                  | 18,194,226 | INTERGENIC            | A | T | - | - |
| -       | -                  | 18,194,578 | INTERGENIC            | A | C | - | - |
| -       | -                  | 18,194,972 | INTERGENIC            | A | C | - | - |
| -       | -                  | 18,194,997 | INTERGENIC            | A | G | - | - |
| -       | -                  | 18,195,112 | INTERGENIC            | A | G | - | - |
| -       | -                  | 18,195,743 | INTERGENIC            | A | G | - | - |
| -       | -                  | 18,195,771 | INTERGENIC            | G | A | - | - |
| -       | -                  | 18,197,100 | INTERGENIC            | A | G | - | - |
| -       | -                  | 18,197,203 | INTERGENIC            | A | G | - | - |
| -       | -                  | 18,197,583 | INTERGENIC            | G | T | - | - |
| -       | -                  | 18,198,049 | INTERGENIC            | C | T | - | - |
| -       | -                  | 18,198,065 | INTERGENIC            | T | A | - | - |
| -       | -                  | 18,198,172 | INTERGENIC            | C | A | - | - |
| -       | -                  | 18,198,227 | INTERGENIC            | A | G | - | - |
| -       | -                  | 18,198,483 | INTERGENIC            | T | A | - | - |
| -       | -                  | 18,198,702 | INTERGENIC            | C | A | - | - |
| -       | -                  | 18,198,715 | INTERGENIC            | T | G | - | - |
| -       | -                  | 18,199,077 | INTERGENIC            | C | A | - | - |
| -       | -                  | 18,199,289 | INTERGENIC            | A | G | - | - |
| -       | -                  | 18,199,540 | INTERGENIC            | A | G | - | - |
| -       | -                  | 18,200,116 | INTERGENIC            | T | A | - | - |
| -       | -                  | 18,200,370 | INTERGENIC            | G | T | - | - |
| -       | -                  | 18,200,482 | INTERGENIC            | A | G | - | - |
| -       | -                  | 18,200,632 | INTERGENIC            | G | A | - | - |
| -       | -                  | 18,200,914 | INTERGENIC            | T | C | - | - |
| -       | -                  | 18,201,053 | INTERGENIC            | C | T | - | - |
| -       | -                  | 18,201,576 | INTERGENIC            | G | A | - | - |
| -       | -                  | 18,201,746 | INTERGENIC            | A | G | - | - |
| -       | -                  | 18,201,766 | INTERGENIC            | G | T | - | - |
| -       | -                  | 18,202,128 | INTERGENIC            | G | A | - | - |
| -       | -                  | 18,202,658 | INTERGENIC            | T | C | - | - |
| -       | -                  | 18,202,961 | INTERGENIC            | G | T | - | - |
| -       | -                  | 18,203,108 | INTERGENIC            | A | G | - | - |
| -       | -                  | 18,203,908 | INTERGENIC            | T | G | - | - |
| -       | -                  | 18,204,473 | INTERGENIC            | G | A | - | - |
| -       | -                  | 18,204,550 | INTERGENIC            | A | C | - | - |
| -       | -                  | 18,204,709 | INTERGENIC            | A | G | - | - |
| -       | -                  | 18,204,889 | INTERGENIC            | G | A | - | - |
| Vom2r63 | ENSRNOT00000046357 | 18,205,385 | UPSTREAM              | G | A | - | - |
| Vom2r63 | ENSRNOT00000046357 | 18,205,568 | UPSTREAM              | G | A | - | - |
| Vom2r63 | ENSRNOT00000046357 | 18,206,068 | UPSTREAM              | C | T | - | - |
| Vom2r63 | ENSRNOT00000046357 | 18,206,260 | UPSTREAM              | C | A | - | - |
| Vom2r63 | ENSRNOT00000046357 | 18,206,418 | UPSTREAM              | T | C | - | - |
| Vom2r63 | ENSRNOT00000046357 | 18,206,897 | UPSTREAM              | T | G | - | - |
| Vom2r63 | ENSRNOT00000046357 | 18,207,053 | UPSTREAM              | G | T | - | - |
| Vom2r63 | ENSRNOT00000046357 | 18,207,312 | UPSTREAM              | C | G | - | - |
| Vom2r63 | ENSRNOT00000046357 | 18,208,031 | UPSTREAM              | A | C | - | - |
| Vom2r63 | ENSRNOT00000046357 | 18,208,449 | UPSTREAM              | A | G | - | - |
| Vom2r63 | ENSRNOT00000046357 | 18,208,597 | UPSTREAM              | G | A | - | - |
| Vom2r63 | ENSRNOT00000046357 | 18,208,805 | UPSTREAM              | G | T | - | - |
| Vom2r63 | ENSRNOT00000046357 | 18,208,824 | UPSTREAM              | G | A | - | - |
| Vom2r63 | ENSRNOT00000046357 | 18,209,350 | UPSTREAM              | G | C | - | - |
| Vom2r63 | ENSRNOT00000046357 | 18,209,407 | UPSTREAM              | T | C | - | - |
| Vom2r63 | ENSRNOT00000046357 | 18,209,805 | UPSTREAM              | A | C | - | - |
| Vom2r63 | ENSRNOT00000046357 | 18,210,043 | UPSTREAM              | C | T | - | - |
| Vom2r63 | ENSRNOT00000046357 | 18,210,066 | UPSTREAM              | G | T | - | - |
| Vom2r63 | ENSRNOT00000046357 | 18,210,290 | UPSTREAM              | T | C | - | - |
| Vom2r63 | ENSRNOT00000046357 | 18,210,406 | NON_SYNONYMOUS_CODING | A | G | I | V |
| Vom2r63 | ENSRNOT00000046357 | 18,211,082 | INTRONIC              | A | G | - | - |
| Vom2r63 | ENSRNOT00000046357 | 18,211,175 | INTRONIC              | C | T | - | - |
| Vom2r63 | ENSRNOT00000046357 | 18,211,274 | INTRONIC              | A | T | - | - |
| Vom2r63 | ENSRNOT00000046357 | 18,211,505 | INTRONIC              | T | C | - | - |
| Vom2r63 | ENSRNOT00000046357 | 18,211,642 | INTRONIC              | A | C | - | - |
| Vom2r63 | ENSRNOT00000046357 | 18,211,803 | INTRONIC              | A | G | - | - |
| Vom2r63 | ENSRNOT00000046357 | 18,212,190 | INTRONIC              | T | G | - | - |
| Vom2r63 | ENSRNOT00000046357 | 18,212,293 | INTRONIC              | C | A | - | - |
| Vom2r63 | ENSRNOT00000046357 | 18,212,328 | INTRONIC              | C | A | - | - |
| Vom2r63 | ENSRNOT00000046357 | 18,212,460 | INTRONIC              | T | A | - | - |
| Vom2r63 | ENSRNOT00000046357 | 18,212,497 | INTRONIC              | T | C | - | - |
| Vom2r63 | ENSRNOT00000046357 | 18,212,563 | INTRONIC              | C | G | - | - |
| Vom2r63 | ENSRNOT00000046357 | 18,212,594 | INTRONIC              | T | A | - | - |
| Vom2r63 | ENSRNOT00000046357 | 18,212,849 | INTRONIC              | C | A | - | - |
| Vom2r63 | ENSRNOT00000046357 | 18,212,868 | INTRONIC              | A | G | - | - |
| Vom2r63 | ENSRNOT00000046357 | 18,212,917 | INTRONIC              | T | C | - | - |
| Vom2r63 | ENSRNOT00000046357 | 18,213,358 | INTRONIC              | A | G | - | - |
| Vom2r63 | ENSRNOT00000046357 | 18,213,394 | INTRONIC              | C | G | - | - |
| Vom2r63 | ENSRNOT00000046357 | 18,213,681 | INTRONIC              | G | A | - | - |
| Vom2r63 | ENSRNOT00000046357 | 18,213,864 | INTRONIC              | G | A | - | - |

|         |                    |            |                       |   |   |   |   |
|---------|--------------------|------------|-----------------------|---|---|---|---|
| Vom2r63 | ENSRNOT00000046357 | 18,214,849 | INTRONIC              | G | A | - | - |
| Vom2r63 | ENSRNOT00000046357 | 18,214,901 | INTRONIC              | T | C | - | - |
| Vom2r63 | ENSRNOT00000046357 | 18,215,612 | INTRONIC              | A | G | - | - |
| Vom2r63 | ENSRNOT00000046357 | 18,215,670 | INTRONIC              | C | T | - | - |
| Vom2r63 | ENSRNOT00000046357 | 18,215,678 | INTRONIC              | C | A | - | - |
| Vom2r63 | ENSRNOT00000046357 | 18,215,683 | INTRONIC              | T | C | - | - |
| Vom2r63 | ENSRNOT00000046357 | 18,215,783 | INTRONIC              | T | G | - | - |
| Vom2r63 | ENSRNOT00000046357 | 18,215,982 | INTRONIC              | T | C | - | - |
| Vom2r63 | ENSRNOT00000046357 | 18,217,748 | INTRONIC              | G | A | - | - |
| Vom2r63 | ENSRNOT00000046357 | 18,218,137 | INTRONIC              | G | A | - | - |
| Vom2r63 | ENSRNOT00000046357 | 18,218,310 | INTRONIC              | G | T | - | - |
| Vom2r63 | ENSRNOT00000046357 | 18,218,312 | INTRONIC              | G | T | - | - |
| Vom2r63 | ENSRNOT00000046357 | 18,218,375 | INTRONIC              | T | G | - | - |
| Vom2r63 | ENSRNOT00000046357 | 18,218,538 | INTRONIC              | T | C | - | - |
| Vom2r63 | ENSRNOT00000046357 | 18,218,544 | INTRONIC              | C | A | - | - |
| Vom2r63 | ENSRNOT00000046357 | 18,218,753 | INTRONIC              | C | T | - | - |
| Vom2r63 | ENSRNOT00000046357 | 18,223,892 | INTRONIC              | A | G | - | - |
| Vom2r63 | ENSRNOT00000046357 | 18,223,893 | INTRONIC              | G | A | - | - |
| Vom2r63 | ENSRNOT00000046357 | 18,223,997 | INTRONIC              | G | A | - | - |
| Vom2r63 | ENSRNOT00000046357 | 18,224,092 | INTRONIC              | C | T | - | - |
| Vom2r63 | ENSRNOT00000046357 | 18,224,111 | INTRONIC              | A | C | - | - |
| Vom2r63 | ENSRNOT00000046357 | 18,224,278 | INTRONIC              | T | A | - | - |
| Vom2r63 | ENSRNOT00000046357 | 18,224,469 | INTRONIC              | C | A | - | - |
| Vom2r63 | ENSRNOT00000046357 | 18,225,301 | INTRONIC              | C | A | - | - |
| Vom2r63 | ENSRNOT00000046357 | 18,225,710 | INTRONIC              | A | G | - | - |
| Vom2r63 | ENSRNOT00000046357 | 18,226,263 | INTRONIC              | A | T | - | - |
| Vom2r63 | ENSRNOT00000046357 | 18,226,334 | INTRONIC              | C | T | - | - |
| Vom2r63 | ENSRNOT00000046357 | 18,227,435 | INTRONIC              | C | T | - | - |
| Vom2r63 | ENSRNOT00000046357 | 18,227,503 | INTRONIC              | C | T | - | - |
| Vom2r63 | ENSRNOT00000046357 | 18,227,954 | INTRONIC              | C | T | - | - |
| Vom2r63 | ENSRNOT00000046357 | 18,230,030 | NON_SYNONYMOUS_CODING | A | G | N | S |
| Vom2r63 | ENSRNOT00000046357 | 18,230,183 | INTRONIC              | C | G | - | - |
| Vom2r63 | ENSRNOT00000046357 | 18,232,099 | ESSENTIAL_SPLICE_SITE | G | A | - | - |
| Vom2r63 | ENSRNOT00000046357 | 18,232,244 | INTRONIC              | G | C | - | - |
| Vom2r63 | ENSRNOT00000046357 | 18,232,797 | INTRONIC              | T | C | - | - |
| Vom2r63 | ENSRNOT00000046357 | 18,232,888 | INTRONIC              | A | T | - | - |
| Vom2r63 | ENSRNOT00000046357 | 18,232,963 | INTRONIC              | C | T | - | - |
| Vom2r63 | ENSRNOT00000046357 | 18,233,014 | INTRONIC              | A | G | - | - |
| Vom2r63 | ENSRNOT00000046357 | 18,233,079 | INTRONIC              | A | G | - | - |
| Vom2r63 | ENSRNOT00000046357 | 18,233,459 | INTRONIC              | G | A | - | - |
| Vom2r63 | ENSRNOT00000046357 | 18,234,388 | INTRONIC              | T | C | - | - |
| Vom2r63 | ENSRNOT00000046357 | 18,234,406 | INTRONIC              | G | A | - | - |
| Vom2r63 | ENSRNOT00000046357 | 18,235,112 | INTRONIC              | A | C | - | - |
| Vom2r63 | ENSRNOT00000046357 | 18,235,504 | INTRONIC              | G | A | - | - |
| Vom2r63 | ENSRNOT00000046357 | 18,235,647 | INTRONIC              | C | T | - | - |
| Vom2r63 | ENSRNOT00000046357 | 18,235,702 | INTRONIC              | A | G | - | - |
| Vom2r63 | ENSRNOT00000046357 | 18,235,704 | INTRONIC              | T | G | - | - |
| Vom2r63 | ENSRNOT00000046357 | 18,235,926 | INTRONIC              | C | A | - | - |
| Vom2r63 | ENSRNOT00000046357 | 18,236,161 | INTRONIC              | T | A | - | - |
| Vom2r63 | ENSRNOT00000046357 | 18,236,163 | INTRONIC              | A | C | - | - |
| Vom2r63 | ENSRNOT00000046357 | 18,237,239 | INTRONIC              | T | C | - | - |
| Vom2r63 | ENSRNOT00000046357 | 18,237,447 | INTRONIC              | T | G | - | - |
| Vom2r63 | ENSRNOT00000046357 | 18,237,718 | INTRONIC              | G | C | - | - |
| Vom2r63 | ENSRNOT00000046357 | 18,238,014 | INTRONIC              | C | A | - | - |
| Vom2r63 | ENSRNOT00000046357 | 18,238,015 | INTRONIC              | T | C | - | - |
| Vom2r63 | ENSRNOT00000046357 | 18,238,157 | INTRONIC              | T | C | - | - |
| Vom2r63 | ENSRNOT00000046357 | 18,238,210 | INTRONIC              | C | A | - | - |
| Vom2r63 | ENSRNOT00000046357 | 18,238,407 | NON_SYNONYMOUS_CODING | G | T | V | L |
| Vom2r63 | ENSRNOT00000046357 | 18,238,522 | NON_SYNONYMOUS_CODING | T | C | L | P |
| Vom2r63 | ENSRNOT00000046357 | 18,238,630 | NON_SYNONYMOUS_CODING | G | C | C | S |
| Vom2r63 | ENSRNOT00000046357 | 18,239,064 | NON_SYNONYMOUS_CODING | T | C | F | L |
| Vom2r63 | ENSRNOT00000046357 | 18,239,114 | SYNONYMOUS_CODING     | A | C | - | - |
| Vom2r63 | ENSRNOT00000046357 | 18,239,221 | NON_SYNONYMOUS_CODING | A | T | N | I |
| Vom2r63 | ENSRNOT00000046357 | 18,239,603 | DOWNSTREAM            | T | C | - | - |
| Vom2r63 | ENSRNOT00000046357 | 18,240,945 | DOWNSTREAM            | G | A | - | - |
| Vom2r63 | ENSRNOT00000046357 | 18,241,066 | DOWNSTREAM            | T | A | - | - |
| Vom2r63 | ENSRNOT00000046357 | 18,241,209 | DOWNSTREAM            | C | T | - | - |
| Vom2r63 | ENSRNOT00000046357 | 18,241,267 | DOWNSTREAM            | T | G | - | - |
| Vom2r63 | ENSRNOT00000046357 | 18,241,316 | DOWNSTREAM            | C | T | - | - |
| Vom2r63 | ENSRNOT00000046357 | 18,241,568 | DOWNSTREAM            | C | T | - | - |
| Vom2r63 | ENSRNOT00000046357 | 18,241,638 | DOWNSTREAM            | G | C | - | - |
| Vom2r63 | ENSRNOT00000046357 | 18,241,908 | DOWNSTREAM            | C | T | - | - |
| Vom2r63 | ENSRNOT00000046357 | 18,241,936 | DOWNSTREAM            | G | A | - | - |
| Vom2r63 | ENSRNOT00000046357 | 18,244,052 | DOWNSTREAM            | G | A | - | - |
| -       | -                  | 18,244,966 | INTERGENIC            | T | A | - | - |
| -       | -                  | 18,244,979 | INTERGENIC            | G | C | - | - |
| -       | -                  | 18,245,344 | INTERGENIC            | G | A | - | - |
| -       | -                  | 18,245,623 | INTERGENIC            | C | T | - | - |
| -       | -                  | 18,248,741 | INTERGENIC            | G | T | - | - |
| -       | -                  | 18,248,869 | INTERGENIC            | T | C | - | - |



|   |            |            |   |   |   |   |
|---|------------|------------|---|---|---|---|
| - | 18,248,983 | INTERGENIC | G | A | - | - |
| - | 18,249,296 | INTERGENIC | G | T | - | - |
| - | 18,249,543 | INTERGENIC | G | A | - | - |
| - | 18,251,781 | INTERGENIC | A | C | - | - |
| - | 18,252,142 | INTERGENIC | A | G | - | - |
| - | 18,252,336 | INTERGENIC | A | T | - | - |
| - | 18,252,559 | INTERGENIC | A | G | - | - |
| - | 18,254,089 | INTERGENIC | T | A | - | - |
| - | 18,254,203 | INTERGENIC | T | C | - | - |
| - | 18,254,593 | INTERGENIC | C | G | - | - |
| - | 18,254,940 | INTERGENIC | G | A | - | - |
| - | 18,255,165 | INTERGENIC | T | A | - | - |
| - | 18,255,167 | INTERGENIC | A | G | - | - |
| - | 18,255,409 | INTERGENIC | T | A | - | - |
| - | 18,255,603 | INTERGENIC | C | T | - | - |
| - | 18,256,037 | INTERGENIC | G | A | - | - |
| - | 18,256,525 | INTERGENIC | C | T | - | - |
| - | 18,256,987 | INTERGENIC | G | T | - | - |
| - | 18,257,127 | INTERGENIC | A | G | - | - |
| - | 18,257,350 | INTERGENIC | G | C | - | - |
| - | 18,258,064 | INTERGENIC | T | C | - | - |
| - | 18,258,223 | INTERGENIC | C | T | - | - |
| - | 18,258,342 | INTERGENIC | C | T | - | - |
| - | 18,259,396 | INTERGENIC | C | A | - | - |
| - | 18,259,436 | INTERGENIC | G | T | - | - |
| - | 18,259,554 | INTERGENIC | A | C | - | - |
| - | 18,259,576 | INTERGENIC | C | T | - | - |
| - | 18,259,846 | INTERGENIC | G | C | - | - |
| - | 18,260,476 | INTERGENIC | A | C | - | - |
| - | 18,264,197 | INTERGENIC | A | G | - | - |
| - | 18,264,421 | INTERGENIC | C | T | - | - |
| - | 18,264,485 | INTERGENIC | C | T | - | - |
| - | 18,264,489 | INTERGENIC | A | C | - | - |
| - | 18,264,701 | INTERGENIC | T | C | - | - |
| - | 18,264,893 | INTERGENIC | G | C | - | - |
| - | 18,265,836 | INTERGENIC | C | A | - | - |
| - | 18,266,337 | INTERGENIC | G | A | - | - |
| - | 18,267,092 | INTERGENIC | T | A | - | - |
| - | 18,267,435 | INTERGENIC | C | G | - | - |
| - | 18,267,695 | INTERGENIC | C | G | - | - |
| - | 18,267,834 | INTERGENIC | C | A | - | - |
| - | 18,268,024 | INTERGENIC | C | G | - | - |
| - | 18,268,047 | INTERGENIC | G | A | - | - |
| - | 18,269,205 | INTERGENIC | A | G | - | - |
| - | 18,269,899 | INTERGENIC | G | T | - | - |
| - | 18,270,070 | INTERGENIC | A | T | - | - |
| - | 18,270,106 | INTERGENIC | G | A | - | - |
| - | 18,270,752 | INTERGENIC | T | G | - | - |
| - | 18,270,785 | INTERGENIC | C | T | - | - |
| - | 18,271,221 | INTERGENIC | A | C | - | - |
| - | 18,272,245 | INTERGENIC | T | C | - | - |
| - | 18,272,412 | INTERGENIC | T | C | - | - |
| - | 18,272,799 | INTERGENIC | C | T | - | - |
| - | 18,273,773 | INTERGENIC | T | C | - | - |
| - | 18,274,269 | INTERGENIC | G | A | - | - |
| - | 18,274,330 | INTERGENIC | A | T | - | - |
| - | 18,274,422 | INTERGENIC | C | T | - | - |
| - | 18,274,767 | INTERGENIC | T | G | - | - |
| - | 18,274,826 | INTERGENIC | G | C | - | - |
| - | 18,275,016 | INTERGENIC | T | C | - | - |
| - | 18,275,017 | INTERGENIC | G | A | - | - |
| - | 18,275,368 | INTERGENIC | G | T | - | - |
| - | 18,275,397 | INTERGENIC | T | A | - | - |
| - | 18,275,478 | INTERGENIC | A | T | - | - |
| - | 18,275,480 | INTERGENIC | G | A | - | - |
| - | 18,276,045 | INTERGENIC | T | G | - | - |
| - | 18,276,631 | INTERGENIC | A | G | - | - |
| - | 18,276,638 | INTERGENIC | T | C | - | - |
| - | 18,277,168 | INTERGENIC | T | C | - | - |
| - | 18,277,181 | INTERGENIC | A | G | - | - |
| - | 18,277,511 | INTERGENIC | G | T | - | - |
| - | 18,277,674 | INTERGENIC | C | T | - | - |
| - | 18,277,773 | INTERGENIC | G | A | - | - |
| - | 18,278,090 | INTERGENIC | T | C | - | - |
| - | 18,278,511 | INTERGENIC | A | T | - | - |
| - | 18,278,538 | INTERGENIC | A | T | - | - |
| - | 18,280,016 | INTERGENIC | G | T | - | - |
| - | 18,280,080 | INTERGENIC | G | C | - | - |
| - | 18,280,263 | INTERGENIC | G | T | - | - |
| - | 18,280,321 | INTERGENIC | T | C | - | - |

|            |                    |            |                       |   |   |   |   |
|------------|--------------------|------------|-----------------------|---|---|---|---|
| -          | -                  | 18,283,655 | INTERGENIC            | A | T | - | - |
| -          | -                  | 18,559,599 | INTERGENIC            | C | T | - | - |
| -          | -                  | 18,560,302 | INTERGENIC            | A | G | - | - |
| -          | -                  | 18,560,324 | INTERGENIC            | C | A | - | - |
| -          | -                  | 18,560,475 | INTERGENIC            | G | T | - | - |
| -          | -                  | 18,562,380 | INTERGENIC            | C | A | - | - |
| -          | -                  | 18,562,398 | INTERGENIC            | T | C | - | - |
| -          | -                  | 18,562,603 | INTERGENIC            | G | A | - | - |
| -          | -                  | 18,562,609 | INTERGENIC            | A | G | - | - |
| -          | -                  | 18,562,680 | INTERGENIC            | T | A | - | - |
| -          | -                  | 18,562,800 | INTERGENIC            | C | T | - | - |
| -          | -                  | 18,563,417 | INTERGENIC            | T | G | - | - |
| -          | -                  | 18,563,598 | INTERGENIC            | G | A | - | - |
| -          | -                  | 18,563,969 | INTERGENIC            | A | C | - | - |
| -          | -                  | 18,565,933 | INTERGENIC            | A | G | - | - |
| -          | -                  | 18,566,565 | INTERGENIC            | C | T | - | - |
| -          | -                  | 18,566,760 | INTERGENIC            | G | A | - | - |
| -          | -                  | 18,566,915 | INTERGENIC            | T | G | - | - |
| -          | -                  | 18,567,291 | INTERGENIC            | A | G | - | - |
| -          | -                  | 18,567,294 | INTERGENIC            | G | A | - | - |
| -          | -                  | 18,567,736 | INTERGENIC            | G | T | - | - |
| -          | -                  | 18,568,719 | INTERGENIC            | C | T | - | - |
| -          | -                  | 18,569,179 | INTERGENIC            | C | G | - | - |
| -          | -                  | 18,569,328 | INTERGENIC            | G | C | - | - |
| -          | -                  | 18,571,322 | INTERGENIC            | C | T | - | - |
| -          | -                  | 18,571,552 | INTERGENIC            | T | C | - | - |
| -          | -                  | 18,571,688 | INTERGENIC            | G | C | - | - |
| RGD1560262 | ENSRNOT00000067247 | 18,575,225 | UPSTREAM              | A | G | - | - |
| RGD1560262 | ENSRNOT00000067247 | 18,576,295 | UPSTREAM              | T | A | - | - |
| RGD1560262 | ENSRNOT00000067247 | 18,576,760 | UPSTREAM              | A | T | - | - |
| RGD1560262 | ENSRNOT00000067247 | 18,577,152 | UPSTREAM              | T | C | - | - |
| RGD1560262 | ENSRNOT00000067247 | 18,577,508 | UPSTREAM              | A | G | - | - |
| RGD1560262 | ENSRNOT00000067247 | 18,577,757 | UPSTREAM              | A | T | - | - |
| RGD1560262 | ENSRNOT00000067247 | 18,578,151 | UPSTREAM              | T | G | - | - |
| RGD1560262 | ENSRNOT00000067247 | 18,578,367 | UPSTREAM              | C | T | - | - |
| RGD1560262 | ENSRNOT00000067247 | 18,578,369 | UPSTREAM              | T | C | - | - |
| RGD1560262 | ENSRNOT00000067247 | 18,578,477 | UPSTREAM              | A | G | - | - |
| RGD1560262 | ENSRNOT00000067247 | 18,578,851 | UPSTREAM              | C | T | - | - |
| RGD1560262 | ENSRNOT00000067247 | 18,578,880 | UPSTREAM              | T | C | - | - |
| RGD1560262 | ENSRNOT00000067247 | 18,578,881 | UPSTREAM              | T | C | - | - |
| RGD1560262 | ENSRNOT00000067247 | 18,578,908 | UPSTREAM              | C | A | - | - |
| RGD1560262 | ENSRNOT00000067247 | 18,578,969 | UPSTREAM              | G | C | - | - |
| RGD1560262 | ENSRNOT00000067247 | 18,579,052 | 5PRIME_UTR            | T | C | - | - |
| RGD1560262 | ENSRNOT00000067247 | 18,579,161 | SYNONYMOUS_CODING     | G | A | - | - |
| RGD1560262 | ENSRNOT00000067247 | 18,579,317 | INTRONIC              | G | A | - | - |
| RGD1560262 | ENSRNOT00000067247 | 18,579,543 | NON_SYNONYMOUS_CODING | A | T | K | N |
| RGD1560262 | ENSRNOT00000067247 | 18,579,940 | INTRONIC              | T | G | - | - |
| RGD1560262 | ENSRNOT00000067247 | 18,580,108 | INTRONIC              | G | T | - | - |
| RGD1560262 | ENSRNOT00000067247 | 18,580,142 | INTRONIC              | G | T | - | - |
| RGD1560262 | ENSRNOT00000067247 | 18,580,230 | INTRONIC              | T | C | - | - |
| RGD1560262 | ENSRNOT00000067247 | 18,580,985 | INTRONIC              | T | A | - | - |
| RGD1560262 | ENSRNOT00000067247 | 18,581,478 | INTRONIC              | A | C | - | - |
| RGD1560262 | ENSRNOT00000067247 | 18,581,844 | INTRONIC              | A | G | - | - |
| RGD1560262 | ENSRNOT00000067247 | 18,583,307 | DOWNSTREAM            | A | G | - | - |
| RGD1560262 | ENSRNOT00000067247 | 18,584,094 | DOWNSTREAM            | T | C | - | - |
| RGD1560262 | ENSRNOT00000067247 | 18,584,340 | DOWNSTREAM            | A | G | - | - |
| RGD1560262 | ENSRNOT00000067247 | 18,586,914 | DOWNSTREAM            | G | A | - | - |
| RGD1560262 | ENSRNOT00000067247 | 18,587,112 | DOWNSTREAM            | C | T | - | - |
| -          | -                  | 18,587,756 | INTERGENIC            | A | C | - | - |
| -          | -                  | 18,588,060 | INTERGENIC            | G | C | - | - |
| -          | -                  | 18,588,528 | INTERGENIC            | A | C | - | - |
| -          | -                  | 18,589,448 | INTERGENIC            | G | T | - | - |
| -          | -                  | 18,589,986 | INTERGENIC            | G | C | - | - |
| -          | -                  | 18,590,747 | INTERGENIC            | T | C | - | - |
| -          | -                  | 18,590,989 | INTERGENIC            | A | T | - | - |
| -          | -                  | 18,591,043 | INTERGENIC            | T | C | - | - |
| -          | -                  | 18,592,082 | INTERGENIC            | A | C | - | - |
| -          | -                  | 18,592,168 | INTERGENIC            | C | T | - | - |
| -          | -                  | 18,592,202 | INTERGENIC            | T | C | - | - |
| -          | -                  | 18,592,205 | INTERGENIC            | G | A | - | - |
| -          | -                  | 18,592,644 | INTERGENIC            | G | T | - | - |
| -          | -                  | 18,592,657 | INTERGENIC            | A | T | - | - |
| -          | -                  | 18,592,676 | INTERGENIC            | G | T | - | - |
| -          | -                  | 18,592,720 | INTERGENIC            | C | T | - | - |
| -          | -                  | 18,592,899 | INTERGENIC            | C | T | - | - |
| -          | -                  | 18,593,424 | INTERGENIC            | T | C | - | - |
| -          | -                  | 18,593,453 | INTERGENIC            | A | T | - | - |
| -          | -                  | 18,593,468 | INTERGENIC            | G | A | - | - |
| -          | -                  | 18,593,548 | INTERGENIC            | A | G | - | - |
| -          | -                  | 18,593,692 | INTERGENIC            | T | C | - | - |

|   |            |            |   |   |   |   |
|---|------------|------------|---|---|---|---|
| - | 18,594,034 | INTERGENIC | A | C | - | - |
| - | 18,594,058 | INTERGENIC | T | G | - | - |
| - | 18,594,202 | INTERGENIC | G | A | - | - |
| - | 18,594,276 | INTERGENIC | C | T | - | - |
| - | 18,594,488 | INTERGENIC | C | T | - | - |
| - | 18,594,498 | INTERGENIC | G | A | - | - |
| - | 18,594,528 | INTERGENIC | T | C | - | - |
| - | 18,594,538 | INTERGENIC | T | C | - | - |
| - | 18,594,663 | INTERGENIC | C | G | - | - |
| - | 18,594,742 | INTERGENIC | C | A | - | - |
| - | 18,594,874 | INTERGENIC | G | T | - | - |
| - | 18,594,917 | INTERGENIC | T | G | - | - |
| - | 18,595,007 | INTERGENIC | C | G | - | - |
| - | 18,595,054 | INTERGENIC | C | G | - | - |
| - | 18,595,526 | INTERGENIC | T | C | - | - |
| - | 18,596,050 | INTERGENIC | G | T | - | - |
| - | 18,596,781 | INTERGENIC | T | C | - | - |
| - | 18,597,594 | INTERGENIC | C | T | - | - |
| - | 18,597,665 | INTERGENIC | C | T | - | - |
| - | 18,597,734 | INTERGENIC | T | A | - | - |
| - | 18,598,116 | INTERGENIC | T | C | - | - |
| - | 18,599,706 | INTERGENIC | A | T | - | - |
| - | 18,599,715 | INTERGENIC | A | G | - | - |
| - | 18,599,939 | INTERGENIC | T | A | - | - |
| - | 18,600,113 | INTERGENIC | A | C | - | - |
| - | 18,600,125 | INTERGENIC | G | C | - | - |
| - | 18,600,233 | INTERGENIC | C | T | - | - |
| - | 18,600,265 | INTERGENIC | G | A | - | - |
| - | 18,600,519 | INTERGENIC | A | T | - | - |
| - | 18,600,570 | INTERGENIC | A | T | - | - |
| - | 18,601,010 | INTERGENIC | G | T | - | - |
| - | 18,601,263 | INTERGENIC | G | A | - | - |
| - | 18,601,585 | INTERGENIC | T | C | - | - |
| - | 18,601,773 | INTERGENIC | G | T | - | - |
| - | 18,602,040 | INTERGENIC | T | C | - | - |
| - | 18,602,199 | INTERGENIC | G | A | - | - |
| - | 18,603,813 | INTERGENIC | A | G | - | - |
| - | 18,603,899 | INTERGENIC | T | C | - | - |
| - | 18,603,900 | INTERGENIC | A | C | - | - |
| - | 18,604,082 | INTERGENIC | T | A | - | - |
| - | 18,605,182 | INTERGENIC | T | C | - | - |
| - | 18,608,485 | INTERGENIC | T | C | - | - |
| - | 18,609,260 | INTERGENIC | A | T | - | - |
| - | 18,609,365 | INTERGENIC | A | G | - | - |
| - | 18,609,823 | INTERGENIC | T | C | - | - |
| - | 18,610,763 | INTERGENIC | G | C | - | - |
| - | 18,611,564 | INTERGENIC | A | G | - | - |
| - | 18,612,131 | INTERGENIC | T | C | - | - |
| - | 18,612,161 | INTERGENIC | C | A | - | - |
| - | 18,615,354 | INTERGENIC | T | G | - | - |
| - | 18,615,712 | INTERGENIC | T | G | - | - |
| - | 18,615,721 | INTERGENIC | C | T | - | - |
| - | 18,617,325 | INTERGENIC | G | A | - | - |
| - | 18,617,870 | INTERGENIC | A | G | - | - |
| - | 18,617,896 | INTERGENIC | A | G | - | - |
| - | 18,617,981 | INTERGENIC | A | G | - | - |
| - | 18,618,131 | INTERGENIC | T | C | - | - |
| - | 18,618,400 | INTERGENIC | C | A | - | - |
| - | 18,618,707 | INTERGENIC | G | A | - | - |
| - | 18,619,023 | INTERGENIC | A | G | - | - |
| - | 18,619,141 | INTERGENIC | T | G | - | - |
| - | 18,619,601 | INTERGENIC | C | T | - | - |
| - | 18,619,622 | INTERGENIC | A | C | - | - |
| - | 18,619,711 | INTERGENIC | T | A | - | - |
| - | 18,620,138 | INTERGENIC | A | C | - | - |
| - | 18,620,499 | INTERGENIC | T | C | - | - |
| - | 18,620,824 | INTERGENIC | C | T | - | - |
| - | 18,621,006 | INTERGENIC | C | T | - | - |
| - | 18,621,265 | INTERGENIC | C | T | - | - |
| - | 18,621,932 | INTERGENIC | G | C | - | - |
| - | 18,621,992 | INTERGENIC | A | G | - | - |
| - | 18,622,379 | INTERGENIC | G | T | - | - |
| - | 18,622,587 | INTERGENIC | C | G | - | - |
| - | 18,622,657 | INTERGENIC | G | A | - | - |
| - | 18,622,691 | INTERGENIC | C | G | - | - |
| - | 18,622,693 | INTERGENIC | G | A | - | - |
| - | 18,622,727 | INTERGENIC | C | T | - | - |
| - | 18,622,935 | INTERGENIC | T | G | - | - |
| - | 18,622,953 | INTERGENIC | C | A | - | - |
| - | 18,623,144 | INTERGENIC | A | G | - | - |

|            |                    |            |            |   |   |   |   |
|------------|--------------------|------------|------------|---|---|---|---|
| -          | -                  | 18,624,300 | INTERGENIC | G | T | - | - |
| -          | -                  | 18,624,858 | INTERGENIC | C | T | - | - |
| -          | -                  | 18,625,254 | INTERGENIC | T | C | - | - |
| -          | -                  | 18,625,299 | INTERGENIC | A | C | - | - |
| -          | -                  | 18,625,662 | INTERGENIC | T | G | - | - |
| -          | -                  | 18,625,666 | INTERGENIC | C | T | - | - |
| -          | -                  | 18,625,738 | INTERGENIC | C | T | - | - |
| -          | -                  | 18,625,749 | INTERGENIC | C | T | - | - |
| -          | -                  | 18,625,958 | INTERGENIC | G | A | - | - |
| -          | -                  | 18,626,335 | INTERGENIC | G | A | - | - |
| -          | -                  | 18,626,850 | INTERGENIC | G | C | - | - |
| -          | -                  | 18,627,250 | INTERGENIC | C | A | - | - |
| -          | -                  | 18,628,028 | INTERGENIC | G | A | - | - |
| -          | -                  | 18,628,272 | INTERGENIC | A | C | - | - |
| -          | -                  | 18,628,565 | INTERGENIC | T | C | - | - |
| -          | -                  | 18,628,596 | INTERGENIC | C | T | - | - |
| -          | -                  | 18,628,611 | INTERGENIC | G | A | - | - |
| -          | -                  | 18,628,645 | INTERGENIC | G | A | - | - |
| -          | -                  | 18,628,650 | INTERGENIC | A | C | - | - |
| -          | -                  | 18,628,689 | INTERGENIC | G | A | - | - |
| -          | -                  | 18,628,713 | INTERGENIC | C | T | - | - |
| -          | -                  | 18,628,716 | INTERGENIC | A | G | - | - |
| -          | -                  | 18,628,789 | INTERGENIC | T | A | - | - |
| -          | -                  | 18,628,865 | INTERGENIC | T | G | - | - |
| -          | -                  | 18,628,870 | INTERGENIC | T | A | - | - |
| -          | -                  | 18,628,891 | INTERGENIC | G | A | - | - |
| -          | -                  | 18,628,897 | INTERGENIC | A | G | - | - |
| -          | -                  | 18,628,946 | INTERGENIC | T | C | - | - |
| -          | -                  | 18,629,016 | INTERGENIC | G | A | - | - |
| -          | -                  | 18,629,017 | INTERGENIC | C | A | - | - |
| -          | -                  | 18,629,069 | INTERGENIC | G | A | - | - |
| -          | -                  | 18,629,104 | INTERGENIC | A | C | - | - |
| -          | -                  | 18,629,157 | INTERGENIC | T | C | - | - |
| -          | -                  | 18,629,170 | INTERGENIC | T | A | - | - |
| -          | -                  | 18,629,217 | INTERGENIC | T | C | - | - |
| -          | -                  | 18,629,241 | INTERGENIC | T | C | - | - |
| -          | -                  | 18,629,270 | INTERGENIC | T | C | - | - |
| F1M3E2_RAT | ENSRNOT00000068118 | 18,629,333 | DOWNSTREAM | C | A | - | - |
| F1M3E2_RAT | ENSRNOT00000068118 | 18,629,404 | DOWNSTREAM | A | C | - | - |
| F1M3E2_RAT | ENSRNOT00000068118 | 18,629,496 | DOWNSTREAM | A | G | - | - |
| F1M3E2_RAT | ENSRNOT00000068118 | 18,629,526 | DOWNSTREAM | T | G | - | - |
| F1M3E2_RAT | ENSRNOT00000068118 | 18,629,535 | DOWNSTREAM | A | T | - | - |
| F1M3E2_RAT | ENSRNOT00000068118 | 18,629,575 | DOWNSTREAM | A | G | - | - |
| F1M3E2_RAT | ENSRNOT00000068118 | 18,629,582 | DOWNSTREAM | A | T | - | - |
| F1M3E2_RAT | ENSRNOT00000068118 | 18,629,624 | DOWNSTREAM | T | G | - | - |
| F1M3E2_RAT | ENSRNOT00000068118 | 18,629,679 | DOWNSTREAM | G | A | - | - |
| F1M3E2_RAT | ENSRNOT00000068118 | 18,629,684 | DOWNSTREAM | G | T | - | - |
| F1M3E2_RAT | ENSRNOT00000068118 | 18,629,774 | DOWNSTREAM | T | C | - | - |
| F1M3E2_RAT | ENSRNOT00000068118 | 18,629,797 | DOWNSTREAM | A | G | - | - |
| F1M3E2_RAT | ENSRNOT00000068118 | 18,630,193 | DOWNSTREAM | A | T | - | - |
| F1M3E2_RAT | ENSRNOT00000068118 | 18,630,452 | DOWNSTREAM | C | T | - | - |
| F1M3E2_RAT | ENSRNOT00000068118 | 18,631,629 | DOWNSTREAM | C | T | - | - |
| F1M3E2_RAT | ENSRNOT00000068118 | 18,632,151 | DOWNSTREAM | C | T | - | - |
| F1M3E2_RAT | ENSRNOT00000068118 | 18,632,176 | DOWNSTREAM | C | G | - | - |
| F1M3E2_RAT | ENSRNOT00000068118 | 18,632,238 | DOWNSTREAM | G | T | - | - |
| F1M3E2_RAT | ENSRNOT00000068118 | 18,632,352 | DOWNSTREAM | G | A | - | - |
| F1M3E2_RAT | ENSRNOT00000068118 | 18,632,428 | DOWNSTREAM | T | G | - | - |
| F1M3E2_RAT | ENSRNOT00000068118 | 18,632,457 | DOWNSTREAM | C | T | - | - |
| F1M3E2_RAT | ENSRNOT00000068118 | 18,632,537 | DOWNSTREAM | T | C | - | - |
| F1M3E2_RAT | ENSRNOT00000068118 | 18,634,057 | DOWNSTREAM | C | A | - | - |
| F1M3E2_RAT | ENSRNOT00000068118 | 18,634,090 | DOWNSTREAM | T | C | - | - |
| F1M3E2_RAT | ENSRNOT00000068118 | 18,634,719 | INTRONIC   | T | C | - | - |
| F1M3E2_RAT | ENSRNOT00000068118 | 18,634,762 | INTRONIC   | T | C | - | - |
| F1M3E2_RAT | ENSRNOT00000068118 | 18,634,808 | INTRONIC   | C | T | - | - |
| F1M3E2_RAT | ENSRNOT00000068118 | 18,634,879 | INTRONIC   | G | T | - | - |
| F1M3E2_RAT | ENSRNOT00000068118 | 18,634,927 | INTRONIC   | T | C | - | - |
| F1M3E2_RAT | ENSRNOT00000068118 | 18,634,931 | INTRONIC   | G | T | - | - |
| F1M3E2_RAT | ENSRNOT00000068118 | 18,634,952 | INTRONIC   | G | A | - | - |
| F1M3E2_RAT | ENSRNOT00000068118 | 18,635,043 | INTRONIC   | G | A | - | - |
| F1M3E2_RAT | ENSRNOT00000068118 | 18,635,168 | INTRONIC   | T | A | - | - |
| F1M3E2_RAT | ENSRNOT00000068118 | 18,635,545 | INTRONIC   | G | C | - | - |
| F1M3E2_RAT | ENSRNOT00000068118 | 18,635,577 | INTRONIC   | C | A | - | - |
| F1M3E2_RAT | ENSRNOT00000068118 | 18,635,590 | INTRONIC   | C | A | - | - |
| F1M3E2_RAT | ENSRNOT00000068118 | 18,635,604 | INTRONIC   | C | T | - | - |
| F1M3E2_RAT | ENSRNOT00000068118 | 18,635,897 | INTRONIC   | T | C | - | - |
| F1M3E2_RAT | ENSRNOT00000068118 | 18,635,900 | INTRONIC   | C | T | - | - |
| F1M3E2_RAT | ENSRNOT00000068118 | 18,635,930 | INTRONIC   | A | T | - | - |
| F1M3E2_RAT | ENSRNOT00000068118 | 18,635,954 | INTRONIC   | G | C | - | - |
| F1M3E2_RAT | ENSRNOT00000068118 | 18,635,958 | INTRONIC   | T | C | - | - |
| F1M3E2_RAT | ENSRNOT00000068118 | 18,635,976 | INTRONIC   | T | A | - | - |

|            |                   |            |                                   |   |   |   |   |
|------------|-------------------|------------|-----------------------------------|---|---|---|---|
| F1M3E2_RAT | ENSRNOT0000068118 | 18,636,006 | INTRONIC                          | T | C | - | - |
| F1M3E2_RAT | ENSRNOT0000068118 | 18,636,034 | INTRONIC                          | C | T | - | - |
| F1M3E2_RAT | ENSRNOT0000068118 | 18,636,536 | INTRONIC                          | A | G | - | - |
| F1M3E2_RAT | ENSRNOT0000068118 | 18,636,615 | INTRONIC                          | C | A | - | - |
| F1M3E2_RAT | ENSRNOT0000068118 | 18,636,706 | INTRONIC                          | A | G | - | - |
| F1M3E2_RAT | ENSRNOT0000068118 | 18,636,875 | INTRONIC                          | G | A | - | - |
| F1M3E2_RAT | ENSRNOT0000068118 | 18,636,881 | INTRONIC                          | A | T | - | - |
| F1M3E2_RAT | ENSRNOT0000068118 | 18,637,019 | NON_SYNONYMOUS_CODING,SPLICE_SITE | A | T | H | Q |
| F1M3E2_RAT | ENSRNOT0000068118 | 18,637,114 | NON_SYNONYMOUS_CODING             | C | T | D | N |
| F1M3E2_RAT | ENSRNOT0000068118 | 18,637,149 | NON_SYNONYMOUS_CODING             | A | G | F | S |
| F1M3E2_RAT | ENSRNOT0000068118 | 18,637,217 | SYNONYMOUS_CODING                 | T | G | - | - |
| F1M3E2_RAT | ENSRNOT0000068118 | 18,637,247 | SYNONYMOUS_CODING                 | T | C | - | - |
| F1M3E2_RAT | ENSRNOT0000068118 | 18,637,268 | NON_SYNONYMOUS_CODING             | C | T | M | I |
| F1M3E2_RAT | ENSRNOT0000068118 | 18,637,280 | SYNONYMOUS_CODING                 | C | T | - | - |
| F1M3E2_RAT | ENSRNOT0000068118 | 18,637,310 | SYNONYMOUS_CODING                 | G | A | - | - |
| F1M3E2_RAT | ENSRNOT0000068118 | 18,637,352 | SYNONYMOUS_CODING                 | T | A | - | - |
| F1M3E2_RAT | ENSRNOT0000068118 | 18,637,986 | UPSTREAM                          | G | T | - | - |
| F1M3E2_RAT | ENSRNOT0000068118 | 18,638,028 | UPSTREAM                          | T | C | - | - |
| F1M3E2_RAT | ENSRNOT0000068118 | 18,639,233 | UPSTREAM                          | G | A | - | - |
| F1M3E2_RAT | ENSRNOT0000068118 | 18,639,644 | UPSTREAM                          | T | G | - | - |
| F1M3E2_RAT | ENSRNOT0000068118 | 18,639,722 | UPSTREAM                          | T | G | - | - |
| F1M3E2_RAT | ENSRNOT0000068118 | 18,639,738 | UPSTREAM                          | G | A | - | - |
| F1M3E2_RAT | ENSRNOT0000068118 | 18,639,745 | UPSTREAM                          | C | G | - | - |
| F1M3E2_RAT | ENSRNOT0000068118 | 18,639,766 | UPSTREAM                          | A | G | - | - |
| F1M3E2_RAT | ENSRNOT0000068118 | 18,639,792 | UPSTREAM                          | G | T | - | - |
| F1M3E2_RAT | ENSRNOT0000068118 | 18,639,934 | UPSTREAM                          | T | A | - | - |
| F1M3E2_RAT | ENSRNOT0000068118 | 18,640,044 | UPSTREAM                          | T | A | - | - |
| F1M3E2_RAT | ENSRNOT0000068118 | 18,640,553 | UPSTREAM                          | T | C | - | - |
| F1M3E2_RAT | ENSRNOT0000068118 | 18,641,054 | UPSTREAM                          | G | A | - | - |
| F1M3E2_RAT | ENSRNOT0000068118 | 18,642,397 | UPSTREAM                          | G | A | - | - |
| F1M3E2_RAT | ENSRNOT0000068118 | 18,642,852 | UPSTREAM                          | C | A | - | - |
| -          | -                 | 18,642,888 | INTERGENIC                        | C | A | - | - |
| -          | -                 | 18,644,031 | INTERGENIC                        | A | G | - | - |
| -          | -                 | 18,645,322 | INTERGENIC                        | A | G | - | - |
| -          | -                 | 18,645,351 | INTERGENIC                        | T | A | - | - |
| -          | -                 | 18,645,367 | INTERGENIC                        | A | G | - | - |
| -          | -                 | 18,645,473 | INTERGENIC                        | A | T | - | - |
| -          | -                 | 18,646,040 | INTERGENIC                        | A | C | - | - |
| -          | -                 | 18,646,052 | INTERGENIC                        | T | G | - | - |
| -          | -                 | 18,646,227 | INTERGENIC                        | C | A | - | - |
| -          | -                 | 18,646,753 | INTERGENIC                        | T | C | - | - |
| -          | -                 | 18,646,791 | INTERGENIC                        | T | G | - | - |
| -          | -                 | 18,646,827 | INTERGENIC                        | G | T | - | - |
| -          | -                 | 18,646,853 | INTERGENIC                        | C | T | - | - |
| -          | -                 | 18,646,957 | INTERGENIC                        | A | G | - | - |
| -          | -                 | 18,647,207 | INTERGENIC                        | G | A | - | - |
| -          | -                 | 18,647,246 | INTERGENIC                        | G | A | - | - |
| -          | -                 | 18,647,324 | INTERGENIC                        | C | G | - | - |
| -          | -                 | 18,647,380 | INTERGENIC                        | G | T | - | - |
| -          | -                 | 18,647,387 | INTERGENIC                        | T | C | - | - |
| -          | -                 | 18,647,558 | INTERGENIC                        | C | A | - | - |
| -          | -                 | 18,647,591 | INTERGENIC                        | C | T | - | - |
| -          | -                 | 18,647,676 | INTERGENIC                        | G | A | - | - |
| -          | -                 | 18,647,681 | INTERGENIC                        | C | A | - | - |
| -          | -                 | 18,647,709 | INTERGENIC                        | T | G | - | - |
| -          | -                 | 18,647,799 | INTERGENIC                        | T | A | - | - |
| -          | -                 | 18,651,382 | INTERGENIC                        | T | C | - | - |
| -          | -                 | 18,654,040 | INTERGENIC                        | T | A | - | - |
| -          | -                 | 18,654,254 | INTERGENIC                        | C | T | - | - |
| -          | -                 | 18,654,356 | INTERGENIC                        | C | T | - | - |
| -          | -                 | 18,654,369 | INTERGENIC                        | T | A | - | - |
| -          | -                 | 18,654,812 | INTERGENIC                        | T | A | - | - |
| -          | -                 | 18,654,945 | INTERGENIC                        | T | C | - | - |
| -          | -                 | 18,654,984 | INTERGENIC                        | C | T | - | - |
| -          | -                 | 18,655,069 | INTERGENIC                        | A | C | - | - |
| -          | -                 | 18,655,335 | INTERGENIC                        | C | T | - | - |
| -          | -                 | 18,655,453 | INTERGENIC                        | A | G | - | - |
| -          | -                 | 18,656,069 | INTERGENIC                        | T | C | - | - |
| -          | -                 | 18,656,608 | INTERGENIC                        | T | C | - | - |
| -          | -                 | 18,656,702 | INTERGENIC                        | T | C | - | - |
| -          | -                 | 18,656,850 | INTERGENIC                        | C | T | - | - |
| -          | -                 | 18,657,537 | INTERGENIC                        | G | C | - | - |
| -          | -                 | 18,657,541 | INTERGENIC                        | G | A | - | - |
| -          | -                 | 18,657,638 | INTERGENIC                        | T | G | - | - |
| -          | -                 | 18,657,643 | INTERGENIC                        | G | A | - | - |
| -          | -                 | 18,657,692 | INTERGENIC                        | A | C | - | - |
| -          | -                 | 18,657,705 | INTERGENIC                        | C | T | - | - |
| -          | -                 | 18,657,722 | INTERGENIC                        | C | G | - | - |
| -          | -                 | 18,657,752 | INTERGENIC                        | C | T | - | - |
| -          | -                 | 18,657,767 | INTERGENIC                        | T | G | - | - |

|   |            |            |   |   |   |   |
|---|------------|------------|---|---|---|---|
| - | 18,657,816 | INTERGENIC | A | G | - | - |
| - | 18,657,842 | INTERGENIC | C | T | - | - |
| - | 18,657,869 | INTERGENIC | C | T | - | - |
| - | 18,657,974 | INTERGENIC | G | A | - | - |
| - | 18,658,065 | INTERGENIC | C | T | - | - |
| - | 18,659,693 | INTERGENIC | T | C | - | - |
| - | 18,659,703 | INTERGENIC | T | C | - | - |
| - | 18,659,744 | INTERGENIC | A | G | - | - |
| - | 18,659,787 | INTERGENIC | A | C | - | - |
| - | 18,659,797 | INTERGENIC | G | A | - | - |
| - | 18,659,820 | INTERGENIC | T | A | - | - |
| - | 18,659,843 | INTERGENIC | T | A | - | - |
| - | 18,659,898 | INTERGENIC | T | A | - | - |
| - | 18,659,899 | INTERGENIC | T | G | - | - |
| - | 18,659,905 | INTERGENIC | C | G | - | - |
| - | 18,659,940 | INTERGENIC | T | A | - | - |
| - | 18,663,667 | INTERGENIC | A | G | - | - |
| - | 18,664,010 | INTERGENIC | T | C | - | - |
| - | 18,664,471 | INTERGENIC | T | C | - | - |
| - | 18,664,495 | INTERGENIC | A | T | - | - |
| - | 18,664,505 | INTERGENIC | C | T | - | - |
| - | 18,664,628 | INTERGENIC | G | T | - | - |
| - | 18,664,679 | INTERGENIC | A | T | - | - |
| - | 18,664,797 | INTERGENIC | T | A | - | - |
| - | 18,664,801 | INTERGENIC | T | G | - | - |
| - | 18,664,883 | INTERGENIC | A | G | - | - |
| - | 18,664,961 | INTERGENIC | G | A | - | - |
| - | 18,665,589 | INTERGENIC | C | T | - | - |
| - | 18,665,609 | INTERGENIC | T | C | - | - |
| - | 18,666,164 | INTERGENIC | A | T | - | - |
| - | 18,666,172 | INTERGENIC | T | C | - | - |
| - | 18,666,376 | INTERGENIC | G | C | - | - |
| - | 18,670,691 | INTERGENIC | T | C | - | - |
| - | 18,671,891 | INTERGENIC | G | C | - | - |
| - | 18,672,268 | INTERGENIC | A | C | - | - |
| - | 18,673,225 | INTERGENIC | T | C | - | - |
| - | 18,673,402 | INTERGENIC | G | A | - | - |
| - | 18,673,573 | INTERGENIC | G | A | - | - |
| - | 18,673,784 | INTERGENIC | G | A | - | - |
| - | 18,679,385 | INTERGENIC | A | G | - | - |
| - | 18,679,391 | INTERGENIC | G | C | - | - |
| - | 18,679,460 | INTERGENIC | T | A | - | - |
| - | 18,679,494 | INTERGENIC | C | T | - | - |
| - | 18,679,656 | INTERGENIC | G | C | - | - |
| - | 18,679,890 | INTERGENIC | T | C | - | - |
| - | 18,679,919 | INTERGENIC | C | T | - | - |
| - | 18,680,060 | INTERGENIC | A | G | - | - |
| - | 18,680,094 | INTERGENIC | C | T | - | - |
| - | 18,680,095 | INTERGENIC | A | G | - | - |
| - | 18,680,130 | INTERGENIC | T | C | - | - |
| - | 18,680,149 | INTERGENIC | A | T | - | - |
| - | 18,680,217 | INTERGENIC | T | G | - | - |
| - | 18,680,556 | INTERGENIC | C | T | - | - |
| - | 18,680,647 | INTERGENIC | C | G | - | - |
| - | 18,680,649 | INTERGENIC | A | G | - | - |
| - | 18,681,159 | INTERGENIC | G | C | - | - |
| - | 18,681,214 | INTERGENIC | T | C | - | - |
| - | 18,681,287 | INTERGENIC | G | C | - | - |
| - | 18,681,540 | INTERGENIC | C | T | - | - |
| - | 18,681,560 | INTERGENIC | A | T | - | - |
| - | 18,681,604 | INTERGENIC | T | C | - | - |
| - | 18,681,606 | INTERGENIC | T | C | - | - |
| - | 18,681,611 | INTERGENIC | T | A | - | - |
| - | 18,681,678 | INTERGENIC | A | C | - | - |
| - | 18,682,242 | INTERGENIC | T | G | - | - |
| - | 18,682,341 | INTERGENIC | G | A | - | - |
| - | 18,682,342 | INTERGENIC | T | C | - | - |
| - | 18,682,370 | INTERGENIC | A | T | - | - |
| - | 18,682,402 | INTERGENIC | T | A | - | - |
| - | 18,682,413 | INTERGENIC | C | T | - | - |
| - | 18,684,394 | INTERGENIC | A | G | - | - |
| - | 18,684,423 | INTERGENIC | C | A | - | - |
| - | 18,684,450 | INTERGENIC | G | C | - | - |
| - | 18,685,047 | INTERGENIC | G | A | - | - |
| - | 18,685,387 | INTERGENIC | G | T | - | - |
| - | 18,685,500 | INTERGENIC | A | C | - | - |
| - | 18,685,502 | INTERGENIC | A | C | - | - |
| - | 18,685,543 | INTERGENIC | A | G | - | - |
| - | 18,687,430 | INTERGENIC | G | A | - | - |
| - | 18,687,557 | INTERGENIC | T | G | - | - |

|         |                    |            |            |   |   |   |   |
|---------|--------------------|------------|------------|---|---|---|---|
|         | -                  | 18,690,082 | INTERGENIC | G | A | - | - |
|         | -                  | 18,690,093 | INTERGENIC | C | A | - | - |
|         | -                  | 18,692,195 | INTERGENIC | G | T | - | - |
|         | -                  | 18,692,574 | INTERGENIC | T | C | - | - |
|         | -                  | 18,692,587 | INTERGENIC | A | C | - | - |
|         | -                  | 18,692,715 | INTERGENIC | G | T | - | - |
|         | -                  | 18,692,768 | INTERGENIC | G | C | - | - |
|         | -                  | 18,692,793 | INTERGENIC | C | T | - | - |
|         | -                  | 18,692,811 | INTERGENIC | A | C | - | - |
|         | -                  | 18,692,847 | INTERGENIC | G | C | - | - |
|         | -                  | 18,692,859 | INTERGENIC | T | C | - | - |
|         | -                  | 18,694,199 | INTERGENIC | G | T | - | - |
|         | -                  | 18,694,264 | INTERGENIC | T | C | - | - |
|         | -                  | 18,694,343 | INTERGENIC | C | T | - | - |
|         | -                  | 18,694,389 | INTERGENIC | A | G | - | - |
|         | -                  | 18,694,392 | INTERGENIC | T | A | - | - |
|         | -                  | 18,694,727 | INTERGENIC | C | G | - | - |
|         | -                  | 18,694,777 | INTERGENIC | T | C | - | - |
|         | -                  | 18,694,781 | INTERGENIC | A | C | - | - |
|         | -                  | 18,694,858 | INTERGENIC | C | A | - | - |
|         | -                  | 18,694,864 | INTERGENIC | G | A | - | - |
|         | -                  | 18,694,889 | INTERGENIC | C | A | - | - |
|         | -                  | 18,694,893 | INTERGENIC | A | G | - | - |
|         | -                  | 18,695,231 | INTERGENIC | A | G | - | - |
|         | -                  | 18,695,964 | INTERGENIC | C | A | - | - |
|         | -                  | 18,696,827 | INTERGENIC | A | G | - | - |
|         | -                  | 18,696,875 | INTERGENIC | A | G | - | - |
| Vom2r64 | ENSRNOT00000042677 | 18,697,099 | DOWNSTREAM | C | T | - | - |
| Vom2r64 | ENSRNOT00000042677 | 18,697,291 | DOWNSTREAM | G | A | - | - |
| Vom2r64 | ENSRNOT00000042677 | 18,697,301 | DOWNSTREAM | T | C | - | - |
| Vom2r64 | ENSRNOT00000042677 | 18,697,347 | DOWNSTREAM | C | G | - | - |
| Vom2r64 | ENSRNOT00000042677 | 18,697,367 | DOWNSTREAM | G | T | - | - |
| Vom2r64 | ENSRNOT00000042677 | 18,697,384 | DOWNSTREAM | C | T | - | - |
| Vom2r64 | ENSRNOT00000042677 | 18,697,513 | DOWNSTREAM | A | C | - | - |
| Vom2r64 | ENSRNOT00000042677 | 18,697,870 | DOWNSTREAM | G | T | - | - |
| Vom2r64 | ENSRNOT00000042677 | 18,697,913 | DOWNSTREAM | C | T | - | - |
| Vom2r64 | ENSRNOT00000042677 | 18,697,936 | DOWNSTREAM | G | A | - | - |
| Vom2r64 | ENSRNOT00000042677 | 18,697,938 | DOWNSTREAM | T | C | - | - |
| Vom2r64 | ENSRNOT00000042677 | 18,697,999 | DOWNSTREAM | C | T | - | - |
| Vom2r64 | ENSRNOT00000042677 | 18,698,122 | DOWNSTREAM | T | A | - | - |
| Vom2r64 | ENSRNOT00000042677 | 18,698,165 | DOWNSTREAM | T | G | - | - |
| Vom2r64 | ENSRNOT00000042677 | 18,698,173 | DOWNSTREAM | C | A | - | - |
| Vom2r64 | ENSRNOT00000042677 | 18,698,302 | DOWNSTREAM | A | G | - | - |
| Vom2r64 | ENSRNOT00000042677 | 18,698,319 | DOWNSTREAM | T | C | - | - |
| Vom2r64 | ENSRNOT00000042677 | 18,698,332 | DOWNSTREAM | C | A | - | - |
| Vom2r64 | ENSRNOT00000042677 | 18,698,369 | DOWNSTREAM | C | A | - | - |
| Vom2r64 | ENSRNOT00000042677 | 18,698,381 | DOWNSTREAM | C | G | - | - |
| Vom2r64 | ENSRNOT00000042677 | 18,698,402 | DOWNSTREAM | G | A | - | - |
| Vom2r64 | ENSRNOT00000042677 | 18,698,436 | DOWNSTREAM | T | C | - | - |
| Vom2r64 | ENSRNOT00000042677 | 18,698,550 | DOWNSTREAM | T | A | - | - |
| Vom2r64 | ENSRNOT00000042677 | 18,698,578 | DOWNSTREAM | A | T | - | - |
| Vom2r64 | ENSRNOT00000042677 | 18,698,649 | DOWNSTREAM | A | G | - | - |
| Vom2r64 | ENSRNOT00000042677 | 18,698,688 | DOWNSTREAM | C | A | - | - |
| Vom2r64 | ENSRNOT00000042677 | 18,698,711 | DOWNSTREAM | G | T | - | - |
| Vom2r64 | ENSRNOT00000042677 | 18,698,733 | DOWNSTREAM | C | A | - | - |
| Vom2r64 | ENSRNOT00000042677 | 18,698,894 | DOWNSTREAM | G | A | - | - |
| Vom2r64 | ENSRNOT00000042677 | 18,698,895 | DOWNSTREAM | G | A | - | - |
| Vom2r64 | ENSRNOT00000042677 | 18,698,961 | DOWNSTREAM | A | G | - | - |
| Vom2r64 | ENSRNOT00000042677 | 18,699,049 | DOWNSTREAM | A | G | - | - |
| Vom2r64 | ENSRNOT00000042677 | 18,699,245 | DOWNSTREAM | A | G | - | - |
| Vom2r64 | ENSRNOT00000042677 | 18,699,286 | DOWNSTREAM | C | A | - | - |
| Vom2r64 | ENSRNOT00000042677 | 18,699,323 | DOWNSTREAM | A | G | - | - |
| Vom2r64 | ENSRNOT00000042677 | 18,699,423 | DOWNSTREAM | T | C | - | - |
| Vom2r64 | ENSRNOT00000042677 | 18,699,493 | DOWNSTREAM | C | T | - | - |
| Vom2r64 | ENSRNOT00000042677 | 18,699,615 | DOWNSTREAM | T | G | - | - |
| Vom2r64 | ENSRNOT00000042677 | 18,699,631 | DOWNSTREAM | C | A | - | - |
| Vom2r64 | ENSRNOT00000042677 | 18,699,828 | DOWNSTREAM | C | G | - | - |
| Vom2r64 | ENSRNOT00000042677 | 18,699,868 | DOWNSTREAM | T | G | - | - |
| Vom2r64 | ENSRNOT00000042677 | 18,699,957 | DOWNSTREAM | A | C | - | - |
| Vom2r64 | ENSRNOT00000042677 | 18,700,004 | DOWNSTREAM | C | A | - | - |
| Vom2r64 | ENSRNOT00000042677 | 18,700,165 | DOWNSTREAM | C | T | - | - |
| Vom2r64 | ENSRNOT00000042677 | 18,700,272 | DOWNSTREAM | G | T | - | - |
| Vom2r64 | ENSRNOT00000042677 | 18,700,291 | DOWNSTREAM | C | T | - | - |
| Vom2r64 | ENSRNOT00000042677 | 18,700,490 | DOWNSTREAM | T | C | - | - |
| Vom2r64 | ENSRNOT00000042677 | 18,700,558 | DOWNSTREAM | C | G | - | - |
| Vom2r64 | ENSRNOT00000042677 | 18,700,559 | DOWNSTREAM | G | A | - | - |
| Vom2r64 | ENSRNOT00000042677 | 18,700,715 | DOWNSTREAM | A | T | - | - |
| Vom2r64 | ENSRNOT00000042677 | 18,700,740 | DOWNSTREAM | C | G | - | - |
| Vom2r64 | ENSRNOT00000042677 | 18,700,789 | DOWNSTREAM | G | A | - | - |
| Vom2r64 | ENSRNOT00000042677 | 18,700,820 | DOWNSTREAM | C | A | - | - |

|         |                    |            |                       |   |   |   |   |
|---------|--------------------|------------|-----------------------|---|---|---|---|
| Vom2r64 | ENSRNOT00000042677 | 18,700,842 | DOWNSTREAM            | C | A | - | - |
| Vom2r64 | ENSRNOT00000042677 | 18,700,920 | DOWNSTREAM            | T | A | - | - |
| Vom2r64 | ENSRNOT00000042677 | 18,700,947 | DOWNSTREAM            | A | G | - | - |
| Vom2r64 | ENSRNOT00000042677 | 18,700,972 | DOWNSTREAM            | G | A | - | - |
| Vom2r64 | ENSRNOT00000042677 | 18,701,001 | DOWNSTREAM            | T | G | - | - |
| Vom2r64 | ENSRNOT00000042677 | 18,701,015 | DOWNSTREAM            | A | G | - | - |
| Vom2r64 | ENSRNOT00000042677 | 18,701,041 | DOWNSTREAM            | C | A | - | - |
| Vom2r64 | ENSRNOT00000042677 | 18,701,095 | DOWNSTREAM            | G | A | - | - |
| Vom2r64 | ENSRNOT00000042677 | 18,701,134 | DOWNSTREAM            | G | A | - | - |
| Vom2r64 | ENSRNOT00000042677 | 18,701,236 | DOWNSTREAM            | T | C | - | - |
| Vom2r64 | ENSRNOT00000042677 | 18,701,240 | DOWNSTREAM            | G | T | - | - |
| Vom2r64 | ENSRNOT00000042677 | 18,701,336 | DOWNSTREAM            | A | T | - | - |
| Vom2r64 | ENSRNOT00000042677 | 18,701,387 | DOWNSTREAM            | C | T | - | - |
| Vom2r64 | ENSRNOT00000042677 | 18,701,545 | DOWNSTREAM            | G | C | - | - |
| Vom2r64 | ENSRNOT00000042677 | 18,701,617 | DOWNSTREAM            | A | G | - | - |
| Vom2r64 | ENSRNOT00000042677 | 18,701,627 | DOWNSTREAM            | A | C | - | - |
| Vom2r64 | ENSRNOT00000042677 | 18,701,790 | DOWNSTREAM            | A | G | - | - |
| Vom2r64 | ENSRNOT00000042677 | 18,701,863 | DOWNSTREAM            | A | G | - | - |
| Vom2r64 | ENSRNOT00000042677 | 18,702,224 | NON_SYNONYMOUS_CODING | A | T | V | E |
| Vom2r64 | ENSRNOT00000042677 | 18,702,572 | NON_SYNONYMOUS_CODING | G | A | A | V |
| Vom2r64 | ENSRNOT00000042677 | 18,702,676 | NON_SYNONYMOUS_CODING | G | C | N | K |
| Vom2r64 | ENSRNOT00000042677 | 18,702,696 | NON_SYNONYMOUS_CODING | T | A | I | F |
| Vom2r64 | ENSRNOT00000042677 | 18,702,725 | NON_SYNONYMOUS_CODING | A | T | F | Y |
| Vom2r64 | ENSRNOT00000042677 | 18,702,734 | NON_SYNONYMOUS_CODING | G | T | A | D |
| Vom2r64 | ENSRNOT00000042677 | 18,702,903 | INTRONIC              | T | G | - | - |
| Vom2r64 | ENSRNOT00000042677 | 18,703,032 | INTRONIC              | A | G | - | - |
| Vom2r64 | ENSRNOT00000042677 | 18,703,054 | INTRONIC              | T | C | - | - |
| Vom2r64 | ENSRNOT00000042677 | 18,703,107 | INTRONIC              | G | A | - | - |
| Vom2r64 | ENSRNOT00000042677 | 18,703,203 | INTRONIC              | C | T | - | - |
| Vom2r64 | ENSRNOT00000042677 | 18,703,219 | INTRONIC              | T | C | - | - |
| Vom2r64 | ENSRNOT00000042677 | 18,703,457 | INTRONIC              | T | C | - | - |
| Vom2r64 | ENSRNOT00000042677 | 18,703,500 | INTRONIC              | G | A | - | - |
| Vom2r64 | ENSRNOT00000042677 | 18,703,538 | INTRONIC              | C | T | - | - |
| Vom2r64 | ENSRNOT00000042677 | 18,703,609 | INTRONIC              | C | A | - | - |
| Vom2r64 | ENSRNOT00000042677 | 18,703,702 | INTRONIC              | T | A | - | - |
| Vom2r64 | ENSRNOT00000042677 | 18,703,741 | INTRONIC              | C | G | - | - |
| Vom2r64 | ENSRNOT00000042677 | 18,703,755 | INTRONIC              | G | A | - | - |
| Vom2r64 | ENSRNOT00000042677 | 18,703,802 | INTRONIC              | C | T | - | - |
| Vom2r64 | ENSRNOT00000042677 | 18,703,822 | INTRONIC              | C | T | - | - |
| Vom2r64 | ENSRNOT00000042677 | 18,703,879 | INTRONIC              | G | A | - | - |
| Vom2r64 | ENSRNOT00000042677 | 18,703,900 | INTRONIC              | G | T | - | - |
| Vom2r64 | ENSRNOT00000042677 | 18,703,978 | INTRONIC              | G | A | - | - |
| Vom2r64 | ENSRNOT00000042677 | 18,704,071 | INTRONIC              | G | A | - | - |
| Vom2r64 | ENSRNOT00000042677 | 18,704,144 | INTRONIC              | T | C | - | - |
| Vom2r64 | ENSRNOT00000042677 | 18,704,298 | INTRONIC              | T | C | - | - |
| Vom2r64 | ENSRNOT00000042677 | 18,704,299 | INTRONIC              | A | G | - | - |
| Vom2r64 | ENSRNOT00000042677 | 18,704,460 | INTRONIC              | G | T | - | - |
| Vom2r64 | ENSRNOT00000042677 | 18,704,473 | INTRONIC              | G | A | - | - |
| Vom2r64 | ENSRNOT00000042677 | 18,704,513 | INTRONIC              | A | G | - | - |
| Vom2r64 | ENSRNOT00000042677 | 18,704,521 | INTRONIC              | C | A | - | - |
| Vom2r64 | ENSRNOT00000042677 | 18,704,620 | INTRONIC              | T | C | - | - |
| Vom2r64 | ENSRNOT00000042677 | 18,704,658 | INTRONIC              | T | C | - | - |
| Vom2r64 | ENSRNOT00000042677 | 18,704,690 | INTRONIC              | A | C | - | - |
| Vom2r64 | ENSRNOT00000042677 | 18,704,691 | INTRONIC              | C | G | - | - |
| Vom2r64 | ENSRNOT00000042677 | 18,704,731 | INTRONIC              | C | A | - | - |
| Vom2r64 | ENSRNOT00000042677 | 18,704,775 | INTRONIC              | G | T | - | - |
| Vom2r64 | ENSRNOT00000042677 | 18,704,797 | INTRONIC              | C | T | - | - |
| Vom2r64 | ENSRNOT00000042677 | 18,704,838 | INTRONIC              | A | G | - | - |
| Vom2r64 | ENSRNOT00000042677 | 18,704,930 | INTRONIC              | T | C | - | - |
| Vom2r64 | ENSRNOT00000042677 | 18,704,968 | INTRONIC              | A | C | - | - |
| Vom2r64 | ENSRNOT00000042677 | 18,704,993 | INTRONIC              | T | A | - | - |
| Vom2r64 | ENSRNOT00000042677 | 18,705,078 | INTRONIC              | G | C | - | - |
| Vom2r64 | ENSRNOT00000042677 | 18,705,079 | INTRONIC              | G | T | - | - |
| Vom2r64 | ENSRNOT00000042677 | 18,705,195 | INTRONIC              | C | A | - | - |
| Vom2r64 | ENSRNOT00000042677 | 18,705,219 | INTRONIC              | G | A | - | - |
| Vom2r64 | ENSRNOT00000042677 | 18,705,228 | INTRONIC              | C | T | - | - |
| Vom2r64 | ENSRNOT00000042677 | 18,705,341 | INTRONIC              | T | G | - | - |
| Vom2r64 | ENSRNOT00000042677 | 18,705,342 | INTRONIC              | A | G | - | - |
| Vom2r64 | ENSRNOT00000042677 | 18,705,405 | INTRONIC              | C | T | - | - |
| Vom2r64 | ENSRNOT00000042677 | 18,705,542 | INTRONIC              | A | G | - | - |
| Vom2r64 | ENSRNOT00000042677 | 18,705,562 | INTRONIC              | C | T | - | - |
| Vom2r64 | ENSRNOT00000042677 | 18,705,676 | INTRONIC              | G | A | - | - |
| Vom2r64 | ENSRNOT00000042677 | 18,705,712 | INTRONIC              | T | C | - | - |
| Vom2r64 | ENSRNOT00000042677 | 18,705,782 | INTRONIC              | A | G | - | - |
| Vom2r64 | ENSRNOT00000042677 | 18,705,910 | INTRONIC              | T | G | - | - |
| Vom2r64 | ENSRNOT00000042677 | 18,705,912 | INTRONIC              | C | T | - | - |
| Vom2r64 | ENSRNOT00000042677 | 18,705,936 | INTRONIC              | G | C | - | - |
| Vom2r64 | ENSRNOT00000042677 | 18,705,968 | INTRONIC              | C | T | - | - |
| Vom2r64 | ENSRNOT00000042677 | 18,705,976 | INTRONIC              | C | T | - | - |
| Vom2r64 | ENSRNOT00000042677 | 18,706,009 | INTRONIC              | C | T | - | - |



|         |                    |            |          |   |   |   |   |
|---------|--------------------|------------|----------|---|---|---|---|
| Vom2r64 | ENSRNOT00000042677 | 18,706,168 | INTRONIC | A | T | - | - |
| Vom2r64 | ENSRNOT00000042677 | 18,706,175 | INTRONIC | C | G | - | - |
| Vom2r64 | ENSRNOT00000042677 | 18,706,246 | INTRONIC | G | T | - | - |
| Vom2r64 | ENSRNOT00000042677 | 18,706,290 | INTRONIC | C | A | - | - |
| Vom2r64 | ENSRNOT00000042677 | 18,706,380 | INTRONIC | G | A | - | - |
| Vom2r64 | ENSRNOT00000042677 | 18,706,414 | INTRONIC | A | C | - | - |
| Vom2r64 | ENSRNOT00000042677 | 18,706,443 | INTRONIC | A | G | - | - |
| Vom2r64 | ENSRNOT00000042677 | 18,706,485 | INTRONIC | C | A | - | - |
| Vom2r64 | ENSRNOT00000042677 | 18,706,851 | INTRONIC | A | C | - | - |
| Vom2r64 | ENSRNOT00000042677 | 18,706,883 | INTRONIC | C | T | - | - |
| Vom2r64 | ENSRNOT00000042677 | 18,706,938 | INTRONIC | T | A | - | - |
| Vom2r64 | ENSRNOT00000042677 | 18,706,972 | INTRONIC | C | G | - | - |
| Vom2r64 | ENSRNOT00000042677 | 18,707,001 | INTRONIC | T | C | - | - |
| Vom2r64 | ENSRNOT00000042677 | 18,707,058 | INTRONIC | C | T | - | - |
| Vom2r64 | ENSRNOT00000042677 | 18,707,082 | INTRONIC | T | G | - | - |
| Vom2r64 | ENSRNOT00000042677 | 18,707,122 | INTRONIC | G | A | - | - |
| Vom2r64 | ENSRNOT00000042677 | 18,707,158 | INTRONIC | G | C | - | - |
| Vom2r64 | ENSRNOT00000042677 | 18,707,389 | INTRONIC | T | G | - | - |
| Vom2r64 | ENSRNOT00000042677 | 18,707,479 | INTRONIC | A | T | - | - |
| Vom2r64 | ENSRNOT00000042677 | 18,707,503 | INTRONIC | A | C | - | - |
| Vom2r64 | ENSRNOT00000042677 | 18,707,669 | INTRONIC | T | G | - | - |
| Vom2r64 | ENSRNOT00000042677 | 18,707,674 | INTRONIC | T | C | - | - |
| Vom2r64 | ENSRNOT00000042677 | 18,707,717 | INTRONIC | T | C | - | - |
| Vom2r64 | ENSRNOT00000042677 | 18,707,801 | INTRONIC | C | G | - | - |
| Vom2r64 | ENSRNOT00000042677 | 18,707,832 | INTRONIC | T | C | - | - |
| Vom2r64 | ENSRNOT00000042677 | 18,707,941 | INTRONIC | T | C | - | - |
| Vom2r64 | ENSRNOT00000042677 | 18,708,077 | INTRONIC | C | T | - | - |
| Vom2r64 | ENSRNOT00000042677 | 18,708,083 | INTRONIC | G | T | - | - |
| Vom2r64 | ENSRNOT00000042677 | 18,708,106 | INTRONIC | G | T | - | - |
| Vom2r64 | ENSRNOT00000042677 | 18,708,171 | INTRONIC | T | G | - | - |
| Vom2r64 | ENSRNOT00000042677 | 18,708,230 | INTRONIC | G | A | - | - |
| Vom2r64 | ENSRNOT00000042677 | 18,708,298 | INTRONIC | T | G | - | - |
| Vom2r64 | ENSRNOT00000042677 | 18,708,313 | INTRONIC | C | T | - | - |
| Vom2r64 | ENSRNOT00000042677 | 18,708,345 | INTRONIC | T | A | - | - |
| Vom2r64 | ENSRNOT00000042677 | 18,708,366 | INTRONIC | T | C | - | - |
| Vom2r64 | ENSRNOT00000042677 | 18,708,723 | INTRONIC | C | T | - | - |
| Vom2r64 | ENSRNOT00000042677 | 18,708,900 | INTRONIC | T | A | - | - |
| Vom2r64 | ENSRNOT00000042677 | 18,708,938 | INTRONIC | T | G | - | - |
| Vom2r64 | ENSRNOT00000042677 | 18,709,033 | INTRONIC | T | C | - | - |
| Vom2r64 | ENSRNOT00000042677 | 18,709,034 | INTRONIC | G | A | - | - |
| Vom2r64 | ENSRNOT00000042677 | 18,709,091 | INTRONIC | T | G | - | - |
| Vom2r64 | ENSRNOT00000042677 | 18,709,224 | INTRONIC | A | T | - | - |
| Vom2r64 | ENSRNOT00000042677 | 18,710,082 | INTRONIC | A | C | - | - |
| Vom2r64 | ENSRNOT00000042677 | 18,710,187 | INTRONIC | C | A | - | - |
| Vom2r64 | ENSRNOT00000042677 | 18,710,214 | INTRONIC | G | T | - | - |
| Vom2r64 | ENSRNOT00000042677 | 18,710,240 | INTRONIC | G | T | - | - |
| Vom2r64 | ENSRNOT00000042677 | 18,710,287 | INTRONIC | T | C | - | - |
| Vom2r64 | ENSRNOT00000042677 | 18,710,372 | INTRONIC | C | A | - | - |
| Vom2r64 | ENSRNOT00000042677 | 18,710,397 | INTRONIC | C | T | - | - |
| Vom2r64 | ENSRNOT00000042677 | 18,710,404 | INTRONIC | A | C | - | - |
| Vom2r64 | ENSRNOT00000042677 | 18,710,467 | INTRONIC | A | G | - | - |
| Vom2r64 | ENSRNOT00000042677 | 18,710,468 | INTRONIC | G | T | - | - |
| Vom2r64 | ENSRNOT00000042677 | 18,710,490 | INTRONIC | G | A | - | - |
| Vom2r64 | ENSRNOT00000042677 | 18,710,611 | INTRONIC | A | G | - | - |
| Vom2r64 | ENSRNOT00000042677 | 18,710,640 | INTRONIC | A | G | - | - |
| Vom2r64 | ENSRNOT00000042677 | 18,710,649 | INTRONIC | T | C | - | - |
| Vom2r64 | ENSRNOT00000042677 | 18,710,687 | INTRONIC | G | T | - | - |
| Vom2r64 | ENSRNOT00000042677 | 18,710,699 | INTRONIC | G | T | - | - |
| Vom2r64 | ENSRNOT00000042677 | 18,710,720 | INTRONIC | T | G | - | - |
| Vom2r64 | ENSRNOT00000042677 | 18,710,724 | INTRONIC | G | T | - | - |
| Vom2r64 | ENSRNOT00000042677 | 18,710,733 | INTRONIC | T | C | - | - |
| Vom2r64 | ENSRNOT00000042677 | 18,710,746 | INTRONIC | C | T | - | - |
| Vom2r64 | ENSRNOT00000042677 | 18,710,774 | INTRONIC | C | T | - | - |
| Vom2r64 | ENSRNOT00000042677 | 18,710,777 | INTRONIC | C | T | - | - |
| Vom2r64 | ENSRNOT00000042677 | 18,710,793 | INTRONIC | C | T | - | - |
| Vom2r64 | ENSRNOT00000042677 | 18,710,852 | INTRONIC | T | C | - | - |
| Vom2r64 | ENSRNOT00000042677 | 18,710,994 | INTRONIC | C | T | - | - |
| Vom2r64 | ENSRNOT00000042677 | 18,711,011 | INTRONIC | C | G | - | - |
| Vom2r64 | ENSRNOT00000042677 | 18,711,061 | INTRONIC | A | G | - | - |
| Vom2r64 | ENSRNOT00000042677 | 18,711,268 | INTRONIC | G | C | - | - |
| Vom2r64 | ENSRNOT00000042677 | 18,711,271 | INTRONIC | C | T | - | - |
| Vom2r64 | ENSRNOT00000042677 | 18,711,334 | INTRONIC | A | C | - | - |
| Vom2r64 | ENSRNOT00000042677 | 18,711,386 | INTRONIC | C | G | - | - |
| Vom2r64 | ENSRNOT00000042677 | 18,711,657 | INTRONIC | C | T | - | - |
| Vom2r64 | ENSRNOT00000042677 | 18,711,659 | INTRONIC | T | C | - | - |
| Vom2r64 | ENSRNOT00000042677 | 18,711,763 | INTRONIC | C | G | - | - |
| Vom2r64 | ENSRNOT00000042677 | 18,711,783 | INTRONIC | A | T | - | - |
| Vom2r64 | ENSRNOT00000042677 | 18,711,892 | INTRONIC | C | A | - | - |
| Vom2r64 | ENSRNOT00000042677 | 18,711,916 | INTRONIC | T | C | - | - |
| Vom2r64 | ENSRNOT00000042677 | 18,712,070 | INTRONIC | C | T | - | - |

|         |                    |            |                       |   |   |   |   |
|---------|--------------------|------------|-----------------------|---|---|---|---|
| Vom2r64 | ENSRNOT00000042677 | 18,712,181 | INTRONIC              | A | G | - | - |
| Vom2r64 | ENSRNOT00000042677 | 18,712,358 | INTRONIC              | G | C | - | - |
| Vom2r64 | ENSRNOT00000042677 | 18,712,411 | INTRONIC              | A | G | - | - |
| Vom2r64 | ENSRNOT00000042677 | 18,712,524 | INTRONIC              | G | A | - | - |
| Vom2r64 | ENSRNOT00000042677 | 18,712,538 | INTRONIC              | G | C | - | - |
| Vom2r64 | ENSRNOT00000042677 | 18,712,639 | INTRONIC              | C | T | - | - |
| Vom2r64 | ENSRNOT00000042677 | 18,712,700 | INTRONIC              | T | C | - | - |
| Vom2r64 | ENSRNOT00000042677 | 18,712,714 | INTRONIC              | G | A | - | - |
| Vom2r64 | ENSRNOT00000042677 | 18,712,789 | INTRONIC              | C | T | - | - |
| Vom2r64 | ENSRNOT00000042677 | 18,712,811 | INTRONIC              | A | C | - | - |
| Vom2r64 | ENSRNOT00000042677 | 18,712,842 | INTRONIC              | A | C | - | - |
| Vom2r64 | ENSRNOT00000042677 | 18,712,844 | INTRONIC              | A | G | - | - |
| Vom2r64 | ENSRNOT00000042677 | 18,712,884 | INTRONIC              | T | A | - | - |
| Vom2r64 | ENSRNOT00000042677 | 18,713,030 | INTRONIC              | G | A | - | - |
| Vom2r64 | ENSRNOT00000042677 | 18,713,109 | INTRONIC              | G | A | - | - |
| Vom2r64 | ENSRNOT00000042677 | 18,713,114 | INTRONIC              | T | C | - | - |
| Vom2r64 | ENSRNOT00000042677 | 18,713,197 | INTRONIC              | G | T | - | - |
| Vom2r64 | ENSRNOT00000042677 | 18,713,223 | INTRONIC              | T | G | - | - |
| Vom2r64 | ENSRNOT00000042677 | 18,713,236 | INTRONIC              | G | A | - | - |
| Vom2r64 | ENSRNOT00000042677 | 18,713,433 | SPLICE_SITE,INTRONIC  | T | C | - | - |
| Vom2r64 | ENSRNOT00000042677 | 18,713,469 | NON_SYNONYMOUS_CODING | A | G | S | P |
| Vom2r64 | ENSRNOT00000042677 | 18,713,519 | NON_SYNONYMOUS_CODING | T | A | K | I |
| Vom2r64 | ENSRNOT00000042677 | 18,713,540 | NON_SYNONYMOUS_CODING | A | C | I | S |
| Vom2r64 | ENSRNOT00000042677 | 18,713,682 | INTRONIC              | G | A | - | - |
| Vom2r64 | ENSRNOT00000042677 | 18,713,811 | INTRONIC              | A | G | - | - |
| Vom2r64 | ENSRNOT00000042677 | 18,713,812 | INTRONIC              | C | T | - | - |
| Vom2r64 | ENSRNOT00000042677 | 18,714,024 | INTRONIC              | A | G | - | - |
| Vom2r64 | ENSRNOT00000042677 | 18,714,208 | SYNONYMOUS_CODING     | T | C | - | - |
| Vom2r64 | ENSRNOT00000042677 | 18,714,220 | NON_SYNONYMOUS_CODING | A | C | D | E |
| Vom2r64 | ENSRNOT00000042677 | 18,714,305 | INTRONIC              | A | G | - | - |
| Vom2r64 | ENSRNOT00000042677 | 18,714,339 | INTRONIC              | T | G | - | - |
| Vom2r64 | ENSRNOT00000042677 | 18,714,367 | INTRONIC              | T | G | - | - |
| Vom2r64 | ENSRNOT00000042677 | 18,714,387 | INTRONIC              | G | A | - | - |
| Vom2r64 | ENSRNOT00000042677 | 18,714,464 | INTRONIC              | C | T | - | - |
| Vom2r64 | ENSRNOT00000042677 | 18,714,534 | INTRONIC              | G | T | - | - |
| Vom2r64 | ENSRNOT00000042677 | 18,714,610 | INTRONIC              | T | A | - | - |
| Vom2r64 | ENSRNOT00000042677 | 18,714,806 | INTRONIC              | T | C | - | - |
| Vom2r64 | ENSRNOT00000042677 | 18,714,887 | INTRONIC              | A | G | - | - |
| Vom2r64 | ENSRNOT00000042677 | 18,714,933 | INTRONIC              | A | T | - | - |
| Vom2r64 | ENSRNOT00000042677 | 18,715,119 | INTRONIC              | G | A | - | - |
| Vom2r64 | ENSRNOT00000042677 | 18,715,205 | INTRONIC              | T | A | - | - |
| Vom2r64 | ENSRNOT00000042677 | 18,715,244 | INTRONIC              | G | A | - | - |
| Vom2r64 | ENSRNOT00000042677 | 18,715,364 | INTRONIC              | G | A | - | - |
| Vom2r64 | ENSRNOT00000042677 | 18,715,400 | INTRONIC              | G | A | - | - |
| Vom2r64 | ENSRNOT00000042677 | 18,715,419 | INTRONIC              | A | G | - | - |
| Vom2r64 | ENSRNOT00000042677 | 18,715,519 | INTRONIC              | C | T | - | - |
| Vom2r64 | ENSRNOT00000042677 | 18,715,574 | INTRONIC              | C | T | - | - |
| Vom2r64 | ENSRNOT00000042677 | 18,715,698 | INTRONIC              | A | G | - | - |
| Vom2r64 | ENSRNOT00000042677 | 18,715,699 | INTRONIC              | T | C | - | - |
| Vom2r64 | ENSRNOT00000042677 | 18,715,847 | INTRONIC              | T | C | - | - |
| Vom2r64 | ENSRNOT00000042677 | 18,715,858 | INTRONIC              | G | C | - | - |
| Vom2r64 | ENSRNOT00000042677 | 18,715,921 | INTRONIC              | A | G | - | - |
| Vom2r64 | ENSRNOT00000042677 | 18,716,055 | INTRONIC              | T | A | - | - |
| Vom2r64 | ENSRNOT00000042677 | 18,716,413 | INTRONIC              | C | A | - | - |
| Vom2r64 | ENSRNOT00000042677 | 18,716,421 | INTRONIC              | A | G | - | - |
| Vom2r64 | ENSRNOT00000042677 | 18,717,899 | INTRONIC              | C | T | - | - |
| Vom2r64 | ENSRNOT00000042677 | 18,717,914 | INTRONIC              | T | C | - | - |
| Vom2r64 | ENSRNOT00000042677 | 18,717,987 | INTRONIC              | A | T | - | - |
| Vom2r64 | ENSRNOT00000042677 | 18,718,038 | INTRONIC              | A | T | - | - |
| Vom2r64 | ENSRNOT00000042677 | 18,720,270 | INTRONIC              | G | A | - | - |
| Vom2r64 | ENSRNOT00000042677 | 18,720,361 | INTRONIC              | G | T | - | - |
| Vom2r64 | ENSRNOT00000042677 | 18,720,500 | INTRONIC              | T | C | - | - |
| Vom2r64 | ENSRNOT00000042677 | 18,720,572 | INTRONIC              | G | C | - | - |
| Vom2r64 | ENSRNOT00000042677 | 18,720,676 | SYNONYMOUS_CODING     | C | T | - | - |
| Vom2r64 | ENSRNOT00000042677 | 18,720,707 | NON_SYNONYMOUS_CODING | C | T | S | N |
| Vom2r64 | ENSRNOT00000042677 | 18,720,832 | SYNONYMOUS_CODING     | G | C | - | - |
| Vom2r64 | ENSRNOT00000042677 | 18,720,857 | NON_SYNONYMOUS_CODING | G | T | P | Q |
| Vom2r64 | ENSRNOT00000042677 | 18,720,893 | NON_SYNONYMOUS_CODING | T | C | K | R |
| Vom2r64 | ENSRNOT00000042677 | 18,720,918 | NON_SYNONYMOUS_CODING | G | A | R | C |
| Vom2r64 | ENSRNOT00000042677 | 18,720,921 | NON_SYNONYMOUS_CODING | T | G | K | Q |
| Vom2r64 | ENSRNOT00000042677 | 18,720,994 | SYNONYMOUS_CODING     | T | A | - | - |
| Vom2r64 | ENSRNOT00000042677 | 18,721,020 | NON_SYNONYMOUS_CODING | G | A | L | F |
| Vom2r64 | ENSRNOT00000042677 | 18,721,054 | SYNONYMOUS_CODING     | G | T | - | - |
| Vom2r64 | ENSRNOT00000042677 | 18,721,110 | NON_SYNONYMOUS_CODING | G | A | R | W |
| Vom2r64 | ENSRNOT00000042677 | 18,721,260 | NON_SYNONYMOUS_CODING | C | G | G | R |
| Vom2r64 | ENSRNOT00000042677 | 18,721,382 | NON_SYNONYMOUS_CODING | G | A | P | L |
| Vom2r64 | ENSRNOT00000042677 | 18,721,386 | NON_SYNONYMOUS_CODING | C | G | G | R |
| Vom2r64 | ENSRNOT00000042677 | 18,721,422 | INTRONIC              | G | A | - | - |
| Vom2r64 | ENSRNOT00000042677 | 18,721,453 | INTRONIC              | C | A | - | - |
| Vom2r64 | ENSRNOT00000042677 | 18,721,500 | INTRONIC              | T | C | - | - |

|         |                    |            |                       |   |   |   |   |
|---------|--------------------|------------|-----------------------|---|---|---|---|
| Vom2r64 | ENSRNOT00000042677 | 18,721,523 | INTRONIC              | G | T | - | - |
| Vom2r64 | ENSRNOT00000042677 | 18,721,524 | INTRONIC              | A | G | - | - |
| Vom2r64 | ENSRNOT00000042677 | 18,721,582 | INTRONIC              | C | T | - | - |
| Vom2r64 | ENSRNOT00000042677 | 18,721,673 | INTRONIC              | A | G | - | - |
| Vom2r64 | ENSRNOT00000042677 | 18,721,688 | INTRONIC              | A | G | - | - |
| Vom2r64 | ENSRNOT00000042677 | 18,721,765 | INTRONIC              | C | A | - | - |
| Vom2r64 | ENSRNOT00000042677 | 18,721,771 | INTRONIC              | T | G | - | - |
| Vom2r64 | ENSRNOT00000042677 | 18,721,800 | INTRONIC              | G | A | - | - |
| Vom2r64 | ENSRNOT00000042677 | 18,721,862 | INTRONIC              | C | T | - | - |
| Vom2r64 | ENSRNOT00000042677 | 18,721,873 | INTRONIC              | A | G | - | - |
| Vom2r64 | ENSRNOT00000042677 | 18,721,888 | INTRONIC              | T | G | - | - |
| Vom2r64 | ENSRNOT00000042677 | 18,721,955 | INTRONIC              | G | T | - | - |
| Vom2r64 | ENSRNOT00000042677 | 18,721,984 | INTRONIC              | T | C | - | - |
| Vom2r64 | ENSRNOT00000042677 | 18,722,021 | INTRONIC              | C | T | - | - |
| Vom2r64 | ENSRNOT00000042677 | 18,722,025 | INTRONIC              | A | C | - | - |
| Vom2r64 | ENSRNOT00000042677 | 18,722,224 | NON_SYNONYMOUS_CODING | T | C | E | G |
| Vom2r64 | ENSRNOT00000042677 | 18,722,266 | NON_SYNONYMOUS_CODING | C | T | G | E |
| Vom2r64 | ENSRNOT00000042677 | 18,722,302 | NON_SYNONYMOUS_CODING | C | T | S | N |
| Vom2r64 | ENSRNOT00000042677 | 18,722,304 | SYNONYMOUS_CODING     | T | A | - | - |
| Vom2r64 | ENSRNOT00000042677 | 18,722,340 | SYNONYMOUS_CODING     | C | T | - | - |
| Vom2r64 | ENSRNOT00000042677 | 18,722,424 | SYNONYMOUS_CODING     | G | A | - | - |
| Vom2r64 | ENSRNOT00000042677 | 18,722,462 | INTRONIC              | C | T | - | - |
| Vom2r64 | ENSRNOT00000042677 | 18,722,553 | INTRONIC              | A | G | - | - |
| Vom2r64 | ENSRNOT00000042677 | 18,722,631 | INTRONIC              | G | T | - | - |
| Vom2r64 | ENSRNOT00000042677 | 18,722,750 | INTRONIC              | C | T | - | - |
| Vom2r64 | ENSRNOT00000042677 | 18,722,771 | INTRONIC              | C | A | - | - |
| Vom2r64 | ENSRNOT00000042677 | 18,722,845 | INTRONIC              | A | T | - | - |
| Vom2r64 | ENSRNOT00000042677 | 18,722,863 | INTRONIC              | C | A | - | - |
| Vom2r64 | ENSRNOT00000042677 | 18,722,970 | INTRONIC              | C | T | - | - |
| Vom2r64 | ENSRNOT00000042677 | 18,723,052 | INTRONIC              | C | T | - | - |
| Vom2r64 | ENSRNOT00000042677 | 18,723,173 | INTRONIC              | A | G | - | - |
| Vom2r64 | ENSRNOT00000042677 | 18,723,181 | INTRONIC              | C | T | - | - |
| Vom2r64 | ENSRNOT00000042677 | 18,723,203 | INTRONIC              | T | A | - | - |
| Vom2r64 | ENSRNOT00000042677 | 18,723,253 | INTRONIC              | G | A | - | - |
| Vom2r64 | ENSRNOT00000042677 | 18,723,323 | INTRONIC              | A | T | - | - |
| Vom2r64 | ENSRNOT00000042677 | 18,723,329 | INTRONIC              | A | T | - | - |
| Vom2r64 | ENSRNOT00000042677 | 18,723,412 | INTRONIC              | C | T | - | - |
| Vom2r64 | ENSRNOT00000042677 | 18,723,501 | INTRONIC              | T | C | - | - |
| Vom2r64 | ENSRNOT00000042677 | 18,723,663 | INTRONIC              | G | A | - | - |
| Vom2r64 | ENSRNOT00000042677 | 18,723,694 | INTRONIC              | C | T | - | - |
| Vom2r64 | ENSRNOT00000042677 | 18,723,695 | INTRONIC              | G | A | - | - |
| Vom2r64 | ENSRNOT00000042677 | 18,723,754 | INTRONIC              | G | T | - | - |
| Vom2r64 | ENSRNOT00000042677 | 18,723,812 | INTRONIC              | A | G | - | - |
| Vom2r64 | ENSRNOT00000042677 | 18,723,896 | INTRONIC              | T | A | - | - |
| Vom2r64 | ENSRNOT00000042677 | 18,724,038 | INTRONIC              | T | C | - | - |
| Vom2r64 | ENSRNOT00000042677 | 18,724,171 | INTRONIC              | C | G | - | - |
| Vom2r64 | ENSRNOT00000042677 | 18,724,184 | INTRONIC              | A | G | - | - |
| Vom2r64 | ENSRNOT00000042677 | 18,724,226 | INTRONIC              | G | A | - | - |
| Vom2r64 | ENSRNOT00000042677 | 18,724,263 | INTRONIC              | A | G | - | - |
| Vom2r64 | ENSRNOT00000042677 | 18,724,316 | INTRONIC              | C | T | - | - |
| Vom2r64 | ENSRNOT00000042677 | 18,724,403 | INTRONIC              | T | C | - | - |
| Vom2r64 | ENSRNOT00000042677 | 18,724,559 | INTRONIC              | T | C | - | - |
| Vom2r64 | ENSRNOT00000042677 | 18,724,564 | INTRONIC              | A | T | - | - |
| Vom2r64 | ENSRNOT00000042677 | 18,724,624 | INTRONIC              | T | A | - | - |
| Vom2r64 | ENSRNOT00000042677 | 18,724,662 | INTRONIC              | T | C | - | - |
| Vom2r64 | ENSRNOT00000042677 | 18,724,684 | INTRONIC              | T | C | - | - |
| Vom2r64 | ENSRNOT00000042677 | 18,724,756 | INTRONIC              | G | A | - | - |
| Vom2r64 | ENSRNOT00000042677 | 18,725,000 | INTRONIC              | C | T | - | - |
| Vom2r64 | ENSRNOT00000042677 | 18,725,147 | INTRONIC              | A | G | - | - |
| Vom2r64 | ENSRNOT00000042677 | 18,725,265 | INTRONIC              | C | G | - | - |
| Vom2r64 | ENSRNOT00000042677 | 18,725,315 | INTRONIC              | C | A | - | - |
| Vom2r64 | ENSRNOT00000042677 | 18,725,328 | INTRONIC              | T | G | - | - |
| Vom2r64 | ENSRNOT00000042677 | 18,725,341 | INTRONIC              | T | C | - | - |
| Vom2r64 | ENSRNOT00000042677 | 18,725,353 | INTRONIC              | C | T | - | - |
| Vom2r64 | ENSRNOT00000042677 | 18,725,411 | INTRONIC              | A | C | - | - |
| Vom2r64 | ENSRNOT00000042677 | 18,725,593 | INTRONIC              | C | G | - | - |
| Vom2r64 | ENSRNOT00000042677 | 18,725,759 | INTRONIC              | T | C | - | - |
| Vom2r64 | ENSRNOT00000042677 | 18,725,761 | INTRONIC              | G | T | - | - |
| Vom2r64 | ENSRNOT00000042677 | 18,725,802 | INTRONIC              | G | T | - | - |
| Vom2r64 | ENSRNOT00000042677 | 18,725,944 | INTRONIC              | A | C | - | - |
| Vom2r64 | ENSRNOT00000042677 | 18,726,052 | INTRONIC              | G | T | - | - |
| Vom2r64 | ENSRNOT00000042677 | 18,726,070 | INTRONIC              | T | A | - | - |
| Vom2r64 | ENSRNOT00000042677 | 18,726,121 | INTRONIC              | T | G | - | - |
| Vom2r64 | ENSRNOT00000042677 | 18,726,295 | INTRONIC              | G | A | - | - |
| Vom2r64 | ENSRNOT00000042677 | 18,726,302 | INTRONIC              | C | T | - | - |
| Vom2r64 | ENSRNOT00000042677 | 18,726,346 | INTRONIC              | T | A | - | - |
| Vom2r64 | ENSRNOT00000042677 | 18,726,421 | INTRONIC              | A | C | - | - |
| Vom2r64 | ENSRNOT00000042677 | 18,726,428 | INTRONIC              | G | C | - | - |
| Vom2r64 | ENSRNOT00000042677 | 18,726,593 | INTRONIC              | T | C | - | - |
| Vom2r64 | ENSRNOT00000042677 | 18,726,701 | INTRONIC              | C | T | - | - |

|         |                    |            |            |   |   |   |   |
|---------|--------------------|------------|------------|---|---|---|---|
| Vom2r64 | ENSRNOT00000042677 | 18,726,851 | INTRONIC   | T | A | - | - |
| Vom2r64 | ENSRNOT00000042677 | 18,726,956 | INTRONIC   | T | C | - | - |
| Vom2r64 | ENSRNOT00000042677 | 18,726,989 | INTRONIC   | C | T | - | - |
| Vom2r64 | ENSRNOT00000042677 | 18,727,121 | INTRONIC   | T | C | - | - |
| Vom2r64 | ENSRNOT00000042677 | 18,727,209 | INTRONIC   | T | C | - | - |
| Vom2r64 | ENSRNOT00000042677 | 18,727,210 | INTRONIC   | G | A | - | - |
| Vom2r64 | ENSRNOT00000042677 | 18,727,228 | INTRONIC   | G | C | - | - |
| Vom2r64 | ENSRNOT00000042677 | 18,727,317 | INTRONIC   | G | C | - | - |
| Vom2r64 | ENSRNOT00000042677 | 18,727,424 | INTRONIC   | C | T | - | - |
| Vom2r64 | ENSRNOT00000042677 | 18,727,497 | INTRONIC   | G | C | - | - |
| Vom2r64 | ENSRNOT00000042677 | 18,727,538 | INTRONIC   | A | C | - | - |
| Vom2r64 | ENSRNOT00000042677 | 18,727,539 | INTRONIC   | G | A | - | - |
| Vom2r64 | ENSRNOT00000042677 | 18,727,648 | INTRONIC   | C | A | - | - |
| Vom2r64 | ENSRNOT00000042677 | 18,727,712 | INTRONIC   | G | T | - | - |
| Vom2r64 | ENSRNOT00000042677 | 18,727,828 | INTRONIC   | G | C | - | - |
| Vom2r64 | ENSRNOT00000042677 | 18,728,055 | INTRONIC   | A | G | - | - |
| Vom2r64 | ENSRNOT00000042677 | 18,728,067 | INTRONIC   | G | A | - | - |
| Vom2r64 | ENSRNOT00000042677 | 18,728,237 | INTRONIC   | A | G | - | - |
| Vom2r64 | ENSRNOT00000042677 | 18,728,363 | INTRONIC   | G | A | - | - |
| Vom2r64 | ENSRNOT00000042677 | 18,728,479 | INTRONIC   | G | A | - | - |
| Vom2r64 | ENSRNOT00000042677 | 18,728,508 | INTRONIC   | A | C | - | - |
| Vom2r64 | ENSRNOT00000042677 | 18,728,549 | INTRONIC   | A | T | - | - |
| Vom2r64 | ENSRNOT00000042677 | 18,728,670 | INTRONIC   | G | C | - | - |
| Vom2r64 | ENSRNOT00000042677 | 18,728,839 | INTRONIC   | T | G | - | - |
| Vom2r64 | ENSRNOT00000042677 | 18,728,867 | INTRONIC   | A | T | - | - |
| Vom2r64 | ENSRNOT00000042677 | 18,728,879 | INTRONIC   | A | G | - | - |
| Vom2r64 | ENSRNOT00000042677 | 18,728,902 | INTRONIC   | A | T | - | - |
| Vom2r64 | ENSRNOT00000042677 | 18,728,917 | INTRONIC   | T | C | - | - |
| Vom2r64 | ENSRNOT00000042677 | 18,728,974 | INTRONIC   | A | T | - | - |
| Vom2r64 | ENSRNOT00000042677 | 18,729,030 | INTRONIC   | T | A | - | - |
| Vom2r64 | ENSRNOT00000042677 | 18,729,064 | INTRONIC   | A | G | - | - |
| Vom2r64 | ENSRNOT00000042677 | 18,729,065 | INTRONIC   | C | T | - | - |
| Vom2r64 | ENSRNOT00000042677 | 18,729,134 | INTRONIC   | C | A | - | - |
| Vom2r64 | ENSRNOT00000042677 | 18,729,157 | INTRONIC   | G | A | - | - |
| Vom2r64 | ENSRNOT00000042677 | 18,729,168 | INTRONIC   | G | T | - | - |
| Vom2r64 | ENSRNOT00000042677 | 18,729,194 | INTRONIC   | G | C | - | - |
| Vom2r64 | ENSRNOT00000042677 | 18,729,208 | INTRONIC   | A | G | - | - |
| Vom2r64 | ENSRNOT00000042677 | 18,729,212 | INTRONIC   | C | T | - | - |
| Vom2r64 | ENSRNOT00000042677 | 18,729,286 | INTRONIC   | A | T | - | - |
| Vom2r64 | ENSRNOT00000042677 | 18,729,547 | INTRONIC   | T | G | - | - |
| Vom2r64 | ENSRNOT00000042677 | 18,729,640 | INTRONIC   | T | G | - | - |
| Vom2r64 | ENSRNOT00000042677 | 18,729,669 | INTRONIC   | T | C | - | - |
| Vom2r64 | ENSRNOT00000042677 | 18,729,760 | INTRONIC   | T | C | - | - |
| Vom2r64 | ENSRNOT00000042677 | 18,729,800 | INTRONIC   | G | T | - | - |
| Vom2r64 | ENSRNOT00000042677 | 18,729,805 | INTRONIC   | A | T | - | - |
| Vom2r64 | ENSRNOT00000042677 | 18,729,826 | INTRONIC   | A | G | - | - |
| Vom2r64 | ENSRNOT00000042677 | 18,729,864 | INTRONIC   | T | C | - | - |
| Vom2r64 | ENSRNOT00000042677 | 18,729,885 | INTRONIC   | T | A | - | - |
| Vom2r64 | ENSRNOT00000042677 | 18,729,926 | INTRONIC   | C | A | - | - |
| Vom2r64 | ENSRNOT00000042677 | 18,729,969 | INTRONIC   | T | C | - | - |
| Vom2r64 | ENSRNOT00000042677 | 18,730,486 | INTRONIC   | C | G | - | - |
| Vom2r64 | ENSRNOT00000042677 | 18,730,658 | INTRONIC   | T | C | - | - |
| Vom2r64 | ENSRNOT00000042677 | 18,730,937 | INTRONIC   | G | A | - | - |
| Vom2r64 | ENSRNOT00000042677 | 18,730,940 | INTRONIC   | A | G | - | - |
| Vom2r64 | ENSRNOT00000042677 | 18,731,010 | INTRONIC   | C | T | - | - |
| Vom2r64 | ENSRNOT00000042677 | 18,731,018 | INTRONIC   | A | G | - | - |
| Vom2r64 | ENSRNOT00000042677 | 18,731,020 | INTRONIC   | G | T | - | - |
| Vom2r64 | ENSRNOT00000042677 | 18,731,131 | INTRONIC   | C | G | - | - |
| Vom2r64 | ENSRNOT00000042677 | 18,731,150 | INTRONIC   | A | G | - | - |
| Vom2r64 | ENSRNOT00000042677 | 18,731,264 | INTRONIC   | T | C | - | - |
| Vom2r64 | ENSRNOT00000042677 | 18,731,272 | INTRONIC   | C | T | - | - |
| Vom2r64 | ENSRNOT00000042677 | 18,732,371 | UPSTREAM   | T | C | - | - |
| Vom2r64 | ENSRNOT00000042677 | 18,732,455 | UPSTREAM   | C | G | - | - |
| Vom2r64 | ENSRNOT00000042677 | 18,733,370 | UPSTREAM   | A | G | - | - |
| Vom2r64 | ENSRNOT00000042677 | 18,733,802 | UPSTREAM   | T | G | - | - |
| Vom2r64 | ENSRNOT00000042677 | 18,733,875 | UPSTREAM   | A | T | - | - |
| Vom2r64 | ENSRNOT00000042677 | 18,733,881 | UPSTREAM   | C | T | - | - |
| Vom2r64 | -                  | 18,740,967 | INTERGENIC | G | C | - | - |
| Vom2r64 | -                  | 18,740,982 | INTERGENIC | T | C | - | - |
| Vom2r64 | -                  | 18,741,003 | INTERGENIC | T | C | - | - |
| Vom2r64 | -                  | 18,741,690 | INTERGENIC | T | A | - | - |
| Vom2r64 | -                  | 18,741,710 | INTERGENIC | G | A | - | - |
| Vom2r64 | -                  | 18,741,945 | INTERGENIC | G | T | - | - |
| Vom2r64 | -                  | 18,742,028 | INTERGENIC | C | T | - | - |
| Vom2r64 | -                  | 18,742,108 | INTERGENIC | C | T | - | - |
| Vom2r64 | -                  | 18,742,134 | INTERGENIC | C | T | - | - |
| Vom2r64 | -                  | 18,742,146 | INTERGENIC | A | C | - | - |
| Vom2r64 | -                  | 18,742,216 | INTERGENIC | T | C | - | - |
| Vom2r64 | -                  | 18,742,217 | INTERGENIC | G | A | - | - |
| Vom2r64 | -                  | 18,742,296 | INTERGENIC | G | T | - | - |

|   |            |            |   |   |   |   |
|---|------------|------------|---|---|---|---|
| - | 18,742,489 | INTERGENIC | G | A | - | - |
| - | 18,742,505 | INTERGENIC | G | T | - | - |
| - | 18,742,520 | INTERGENIC | T | C | - | - |
| - | 18,742,591 | INTERGENIC | A | G | - | - |
| - | 18,742,654 | INTERGENIC | A | G | - | - |
| - | 18,742,858 | INTERGENIC | T | A | - | - |
| - | 18,742,861 | INTERGENIC | C | T | - | - |
| - | 18,742,993 | INTERGENIC | T | C | - | - |
| - | 18,743,106 | INTERGENIC | C | T | - | - |
| - | 18,743,163 | INTERGENIC | T | G | - | - |
| - | 18,743,588 | INTERGENIC | C | A | - | - |
| - | 18,743,602 | INTERGENIC | G | C | - | - |
| - | 18,743,607 | INTERGENIC | A | T | - | - |
| - | 18,743,671 | INTERGENIC | C | G | - | - |
| - | 18,743,693 | INTERGENIC | T | A | - | - |
| - | 18,743,739 | INTERGENIC | T | C | - | - |
| - | 18,743,757 | INTERGENIC | A | T | - | - |
| - | 18,743,761 | INTERGENIC | T | C | - | - |
| - | 18,743,877 | INTERGENIC | G | T | - | - |
| - | 18,743,910 | INTERGENIC | G | C | - | - |
| - | 18,743,947 | INTERGENIC | T | A | - | - |
| - | 18,745,071 | INTERGENIC | A | G | - | - |
| - | 18,745,100 | INTERGENIC | A | G | - | - |
| - | 18,745,106 | INTERGENIC | A | T | - | - |
| - | 18,745,158 | INTERGENIC | C | T | - | - |
| - | 18,745,427 | INTERGENIC | T | G | - | - |
| - | 18,745,439 | INTERGENIC | C | T | - | - |
| - | 18,745,513 | INTERGENIC | T | A | - | - |
| - | 18,745,516 | INTERGENIC | T | G | - | - |
| - | 18,745,560 | INTERGENIC | T | C | - | - |
| - | 18,745,634 | INTERGENIC | C | T | - | - |
| - | 18,746,036 | INTERGENIC | A | C | - | - |
| - | 18,746,095 | INTERGENIC | G | A | - | - |
| - | 18,746,145 | INTERGENIC | A | T | - | - |
| - | 18,746,151 | INTERGENIC | C | T | - | - |
| - | 18,746,177 | INTERGENIC | A | C | - | - |
| - | 18,746,277 | INTERGENIC | A | G | - | - |
| - | 18,746,353 | INTERGENIC | A | C | - | - |
| - | 18,746,387 | INTERGENIC | A | T | - | - |
| - | 18,746,437 | INTERGENIC | T | A | - | - |
| - | 18,746,486 | INTERGENIC | G | C | - | - |
| - | 18,746,608 | INTERGENIC | C | G | - | - |
| - | 18,746,616 | INTERGENIC | G | T | - | - |
| - | 18,746,797 | INTERGENIC | C | A | - | - |
| - | 18,746,970 | INTERGENIC | A | C | - | - |
| - | 18,747,454 | INTERGENIC | G | A | - | - |
| - | 18,747,540 | INTERGENIC | C | T | - | - |
| - | 18,747,599 | INTERGENIC | C | A | - | - |
| - | 18,747,683 | INTERGENIC | G | A | - | - |
| - | 18,747,927 | INTERGENIC | G | A | - | - |
| - | 18,748,169 | INTERGENIC | G | C | - | - |
| - | 18,748,214 | INTERGENIC | G | A | - | - |
| - | 18,748,280 | INTERGENIC | G | A | - | - |
| - | 18,748,298 | INTERGENIC | G | C | - | - |
| - | 18,748,345 | INTERGENIC | G | A | - | - |
| - | 18,748,359 | INTERGENIC | A | C | - | - |
| - | 18,748,754 | INTERGENIC | G | A | - | - |
| - | 18,748,788 | INTERGENIC | G | T | - | - |
| - | 18,748,888 | INTERGENIC | T | A | - | - |
| - | 18,749,026 | INTERGENIC | A | C | - | - |
| - | 18,749,976 | INTERGENIC | A | T | - | - |
| - | 18,750,006 | INTERGENIC | A | C | - | - |
| - | 18,750,013 | INTERGENIC | T | C | - | - |
| - | 18,750,061 | INTERGENIC | T | C | - | - |
| - | 18,750,077 | INTERGENIC | C | T | - | - |
| - | 18,751,093 | INTERGENIC | G | A | - | - |
| - | 18,751,243 | INTERGENIC | G | A | - | - |
| - | 18,751,341 | INTERGENIC | C | T | - | - |
| - | 18,752,987 | INTERGENIC | T | C | - | - |
| - | 18,753,016 | INTERGENIC | G | C | - | - |
| - | 18,753,035 | INTERGENIC | C | G | - | - |
| - | 18,753,053 | INTERGENIC | G | C | - | - |
| - | 18,753,506 | INTERGENIC | T | C | - | - |
| - | 18,753,521 | INTERGENIC | G | A | - | - |
| - | 18,753,766 | INTERGENIC | G | T | - | - |
| - | 18,753,803 | INTERGENIC | C | T | - | - |
| - | 18,753,883 | INTERGENIC | C | T | - | - |
| - | 18,753,926 | INTERGENIC | G | T | - | - |
| - | 18,753,952 | INTERGENIC | T | C | - | - |
| - | 18,753,956 | INTERGENIC | C | T | - | - |

|   |            |            |   |   |   |   |
|---|------------|------------|---|---|---|---|
| - | 18,753,980 | INTERGENIC | G | C | - | - |
| - | 18,754,016 | INTERGENIC | A | C | - | - |
| - | 18,754,284 | INTERGENIC | C | A | - | - |
| - | 18,754,288 | INTERGENIC | C | A | - | - |
| - | 18,756,505 | INTERGENIC | T | G | - | - |
| - | 18,756,568 | INTERGENIC | A | G | - | - |
| - | 18,756,584 | INTERGENIC | T | A | - | - |
| - | 18,756,763 | INTERGENIC | C | T | - | - |
| - | 18,756,847 | INTERGENIC | G | T | - | - |
| - | 18,756,880 | INTERGENIC | C | A | - | - |
| - | 18,757,197 | INTERGENIC | T | C | - | - |
| - | 18,757,216 | INTERGENIC | T | A | - | - |
| - | 18,757,241 | INTERGENIC | G | C | - | - |
| - | 18,757,254 | INTERGENIC | T | A | - | - |
| - | 18,757,280 | INTERGENIC | T | A | - | - |
| - | 18,757,303 | INTERGENIC | T | G | - | - |
| - | 18,757,342 | INTERGENIC | T | G | - | - |
| - | 18,757,347 | INTERGENIC | A | G | - | - |
| - | 18,757,375 | INTERGENIC | T | G | - | - |
| - | 18,757,383 | INTERGENIC | C | T | - | - |
| - | 18,757,483 | INTERGENIC | T | A | - | - |
| - | 18,757,494 | INTERGENIC | G | T | - | - |
| - | 18,757,571 | INTERGENIC | G | C | - | - |
| - | 18,757,583 | INTERGENIC | T | G | - | - |
| - | 18,757,598 | INTERGENIC | A | C | - | - |
| - | 18,757,645 | INTERGENIC | G | T | - | - |
| - | 18,757,668 | INTERGENIC | G | A | - | - |
| - | 18,757,696 | INTERGENIC | T | C | - | - |
| - | 18,757,697 | INTERGENIC | T | C | - | - |
| - | 18,757,812 | INTERGENIC | T | C | - | - |
| - | 18,757,828 | INTERGENIC | G | A | - | - |
| - | 18,757,930 | INTERGENIC | C | T | - | - |
| - | 18,757,958 | INTERGENIC | A | G | - | - |
| - | 18,757,983 | INTERGENIC | T | C | - | - |
| - | 18,758,007 | INTERGENIC | A | G | - | - |
| - | 18,758,056 | INTERGENIC | T | C | - | - |
| - | 18,758,492 | INTERGENIC | T | A | - | - |
| - | 18,759,251 | INTERGENIC | C | T | - | - |
| - | 18,759,349 | INTERGENIC | G | A | - | - |
| - | 18,759,476 | INTERGENIC | A | G | - | - |
| - | 18,759,555 | INTERGENIC | G | T | - | - |
| - | 18,759,670 | INTERGENIC | A | T | - | - |
| - | 18,759,868 | INTERGENIC | C | G | - | - |
| - | 18,759,960 | INTERGENIC | C | T | - | - |
| - | 18,759,971 | INTERGENIC | G | A | - | - |
| - | 18,760,009 | INTERGENIC | T | C | - | - |
| - | 18,760,055 | INTERGENIC | T | C | - | - |
| - | 18,761,560 | INTERGENIC | G | C | - | - |
| - | 18,761,587 | INTERGENIC | A | C | - | - |
| - | 18,761,659 | INTERGENIC | C | A | - | - |
| - | 18,761,670 | INTERGENIC | T | C | - | - |
| - | 18,761,726 | INTERGENIC | T | C | - | - |
| - | 18,761,785 | INTERGENIC | C | T | - | - |
| - | 18,761,801 | INTERGENIC | A | G | - | - |
| - | 18,761,925 | INTERGENIC | T | C | - | - |
| - | 18,761,988 | INTERGENIC | C | T | - | - |
| - | 18,762,029 | INTERGENIC | G | A | - | - |
| - | 18,762,045 | INTERGENIC | C | A | - | - |
| - | 18,762,103 | INTERGENIC | A | T | - | - |
| - | 18,762,106 | INTERGENIC | T | C | - | - |
| - | 18,762,139 | INTERGENIC | T | C | - | - |
| - | 18,762,151 | INTERGENIC | C | A | - | - |
| - | 18,762,205 | INTERGENIC | T | C | - | - |
| - | 18,762,238 | INTERGENIC | C | A | - | - |
| - | 18,762,250 | INTERGENIC | A | G | - | - |
| - | 18,762,393 | INTERGENIC | A | C | - | - |
| - | 18,762,430 | INTERGENIC | G | A | - | - |
| - | 18,764,059 | INTERGENIC | T | A | - | - |
| - | 18,764,145 | INTERGENIC | T | G | - | - |
| - | 18,764,149 | INTERGENIC | T | G | - | - |
| - | 18,764,595 | INTERGENIC | C | T | - | - |
| - | 18,764,662 | INTERGENIC | A | T | - | - |
| - | 18,764,737 | INTERGENIC | G | T | - | - |
| - | 18,765,087 | INTERGENIC | T | C | - | - |
| - | 18,765,354 | INTERGENIC | T | G | - | - |
| - | 18,765,416 | INTERGENIC | T | G | - | - |
| - | 18,765,660 | INTERGENIC | A | G | - | - |
| - | 18,766,002 | INTERGENIC | G | T | - | - |
| - | 18,766,031 | INTERGENIC | C | T | - | - |
| - | 18,766,032 | INTERGENIC | A | G | - | - |

|   |            |            |   |   |   |   |
|---|------------|------------|---|---|---|---|
| - | 18,766,154 | INTERGENIC | G | C | - | - |
| - | 18,766,210 | INTERGENIC | C | T | - | - |
| - | 18,766,267 | INTERGENIC | A | C | - | - |
| - | 18,766,396 | INTERGENIC | A | C | - | - |
| - | 18,766,415 | INTERGENIC | C | A | - | - |
| - | 18,766,545 | INTERGENIC | G | C | - | - |
| - | 18,766,546 | INTERGENIC | G | C | - | - |
| - | 18,766,693 | INTERGENIC | A | G | - | - |
| - | 18,766,715 | INTERGENIC | A | T | - | - |
| - | 18,766,725 | INTERGENIC | G | C | - | - |
| - | 18,766,765 | INTERGENIC | A | C | - | - |
| - | 18,766,840 | INTERGENIC | C | G | - | - |
| - | 18,766,848 | INTERGENIC | T | G | - | - |
| - | 18,766,972 | INTERGENIC | A | C | - | - |
| - | 18,767,623 | INTERGENIC | A | G | - | - |
| - | 18,767,666 | INTERGENIC | A | T | - | - |
| - | 18,767,737 | INTERGENIC | G | A | - | - |
| - | 18,767,765 | INTERGENIC | C | T | - | - |
| - | 18,767,766 | INTERGENIC | A | G | - | - |
| - | 18,767,794 | INTERGENIC | G | A | - | - |
| - | 18,767,801 | INTERGENIC | G | A | - | - |
| - | 18,768,102 | INTERGENIC | A | G | - | - |
| - | 18,768,292 | INTERGENIC | C | G | - | - |
| - | 18,768,310 | INTERGENIC | G | A | - | - |
| - | 18,768,351 | INTERGENIC | C | A | - | - |
| - | 18,768,352 | INTERGENIC | A | G | - | - |
| - | 18,768,380 | INTERGENIC | T | C | - | - |
| - | 18,768,416 | INTERGENIC | A | G | - | - |
| - | 18,768,510 | INTERGENIC | T | C | - | - |
| - | 18,768,626 | INTERGENIC | C | T | - | - |
| - | 18,768,671 | INTERGENIC | A | C | - | - |
| - | 18,769,247 | INTERGENIC | C | T | - | - |
| - | 18,769,252 | INTERGENIC | C | T | - | - |
| - | 18,769,295 | INTERGENIC | T | G | - | - |
| - | 18,769,312 | INTERGENIC | T | A | - | - |
| - | 18,769,411 | INTERGENIC | C | T | - | - |
| - | 18,769,418 | INTERGENIC | T | C | - | - |
| - | 18,770,164 | INTERGENIC | T | C | - | - |
| - | 18,770,169 | INTERGENIC | C | A | - | - |
| - | 18,770,218 | INTERGENIC | C | T | - | - |
| - | 18,770,314 | INTERGENIC | A | C | - | - |
| - | 18,770,411 | INTERGENIC | C | A | - | - |
| - | 18,770,425 | INTERGENIC | T | C | - | - |
| - | 18,770,473 | INTERGENIC | A | G | - | - |
| - | 18,770,545 | INTERGENIC | G | T | - | - |
| - | 18,770,603 | INTERGENIC | G | C | - | - |
| - | 18,770,653 | INTERGENIC | A | T | - | - |
| - | 18,770,946 | INTERGENIC | C | A | - | - |
| - | 18,770,970 | INTERGENIC | A | G | - | - |
| - | 18,770,991 | INTERGENIC | T | C | - | - |
| - | 18,770,998 | INTERGENIC | G | A | - | - |
| - | 18,771,014 | INTERGENIC | T | C | - | - |
| - | 18,771,049 | INTERGENIC | A | T | - | - |
| - | 18,771,312 | INTERGENIC | C | A | - | - |
| - | 18,771,430 | INTERGENIC | A | G | - | - |
| - | 18,771,566 | INTERGENIC | C | T | - | - |
| - | 18,771,577 | INTERGENIC | A | G | - | - |
| - | 18,771,582 | INTERGENIC | C | T | - | - |
| - | 18,771,613 | INTERGENIC | T | C | - | - |
| - | 18,771,671 | INTERGENIC | T | A | - | - |
| - | 18,771,771 | INTERGENIC | A | T | - | - |
| - | 18,771,809 | INTERGENIC | G | A | - | - |
| - | 18,771,829 | INTERGENIC | G | C | - | - |
| - | 18,771,880 | INTERGENIC | T | A | - | - |
| - | 18,771,917 | INTERGENIC | C | G | - | - |
| - | 18,771,954 | INTERGENIC | T | A | - | - |
| - | 18,771,997 | INTERGENIC | G | T | - | - |
| - | 18,772,039 | INTERGENIC | A | G | - | - |
| - | 18,772,388 | INTERGENIC | A | G | - | - |
| - | 18,772,410 | INTERGENIC | G | T | - | - |
| - | 18,772,492 | INTERGENIC | A | C | - | - |
| - | 18,772,868 | INTERGENIC | A | G | - | - |
| - | 18,773,035 | INTERGENIC | C | A | - | - |
| - | 18,773,426 | INTERGENIC | C | A | - | - |
| - | 18,773,510 | INTERGENIC | T | C | - | - |
| - | 18,773,665 | INTERGENIC | C | T | - | - |
| - | 18,773,666 | INTERGENIC | A | G | - | - |
| - | 18,773,697 | INTERGENIC | C | T | - | - |
| - | 18,773,843 | INTERGENIC | T | C | - | - |
| - | 18,773,847 | INTERGENIC | T | C | - | - |

|   |            |            |   |   |   |   |
|---|------------|------------|---|---|---|---|
| - | 18,774,051 | INTERGENIC | C | T | - | - |
| - | 18,774,139 | INTERGENIC | C | G | - | - |
| - | 18,774,165 | INTERGENIC | T | C | - | - |
| - | 18,774,197 | INTERGENIC | A | T | - | - |
| - | 18,774,285 | INTERGENIC | A | T | - | - |
| - | 18,774,309 | INTERGENIC | T | G | - | - |
| - | 18,774,350 | INTERGENIC | G | A | - | - |
| - | 18,774,359 | INTERGENIC | G | T | - | - |
| - | 18,774,412 | INTERGENIC | A | G | - | - |
| - | 18,774,470 | INTERGENIC | T | G | - | - |
| - | 18,774,474 | INTERGENIC | C | T | - | - |
| - | 18,774,727 | INTERGENIC | T | C | - | - |
| - | 18,774,762 | INTERGENIC | G | C | - | - |
| - | 18,775,133 | INTERGENIC | C | T | - | - |
| - | 18,775,193 | INTERGENIC | T | A | - | - |
| - | 18,775,293 | INTERGENIC | A | G | - | - |
| - | 18,775,314 | INTERGENIC | C | T | - | - |
| - | 18,775,467 | INTERGENIC | T | C | - | - |
| - | 18,775,473 | INTERGENIC | T | G | - | - |
| - | 18,775,563 | INTERGENIC | C | G | - | - |
| - | 18,775,612 | INTERGENIC | A | G | - | - |
| - | 18,775,660 | INTERGENIC | T | C | - | - |
| - | 18,775,736 | INTERGENIC | G | A | - | - |
| - | 18,775,793 | INTERGENIC | C | T | - | - |
| - | 18,775,810 | INTERGENIC | C | T | - | - |
| - | 18,775,826 | INTERGENIC | A | G | - | - |
| - | 18,775,865 | INTERGENIC | C | T | - | - |
| - | 18,775,882 | INTERGENIC | A | C | - | - |
| - | 18,776,157 | INTERGENIC | T | G | - | - |
| - | 18,776,180 | INTERGENIC | A | T | - | - |
| - | 18,776,223 | INTERGENIC | T | C | - | - |
| - | 18,776,245 | INTERGENIC | A | G | - | - |
| - | 18,776,246 | INTERGENIC | T | C | - | - |
| - | 18,776,307 | INTERGENIC | T | C | - | - |
| - | 18,776,345 | INTERGENIC | T | C | - | - |
| - | 18,776,368 | INTERGENIC | G | A | - | - |
| - | 18,776,387 | INTERGENIC | C | T | - | - |
| - | 18,776,455 | INTERGENIC | T | C | - | - |
| - | 18,776,530 | INTERGENIC | G | A | - | - |
| - | 18,776,553 | INTERGENIC | T | C | - | - |
| - | 18,776,615 | INTERGENIC | C | T | - | - |
| - | 18,776,616 | INTERGENIC | A | G | - | - |
| - | 18,776,673 | INTERGENIC | G | C | - | - |
| - | 18,776,680 | INTERGENIC | C | T | - | - |
| - | 18,776,813 | INTERGENIC | A | T | - | - |
| - | 18,776,826 | INTERGENIC | G | A | - | - |
| - | 18,776,995 | INTERGENIC | G | T | - | - |
| - | 18,777,059 | INTERGENIC | G | C | - | - |
| - | 18,777,599 | INTERGENIC | A | T | - | - |
| - | 18,777,633 | INTERGENIC | C | A | - | - |
| - | 18,777,645 | INTERGENIC | C | A | - | - |
| - | 18,777,711 | INTERGENIC | T | C | - | - |
| - | 18,777,944 | INTERGENIC | G | A | - | - |
| - | 18,777,982 | INTERGENIC | C | A | - | - |
| - | 18,778,006 | INTERGENIC | C | T | - | - |
| - | 18,778,052 | INTERGENIC | G | C | - | - |
| - | 18,778,139 | INTERGENIC | A | T | - | - |
| - | 18,778,220 | INTERGENIC | G | A | - | - |
| - | 18,778,279 | INTERGENIC | A | C | - | - |
| - | 18,778,306 | INTERGENIC | T | C | - | - |
| - | 18,778,403 | INTERGENIC | T | G | - | - |
| - | 18,778,421 | INTERGENIC | T | G | - | - |
| - | 18,778,435 | INTERGENIC | G | T | - | - |
| - | 18,778,489 | INTERGENIC | C | G | - | - |
| - | 18,778,731 | INTERGENIC | C | G | - | - |
| - | 18,778,810 | INTERGENIC | G | T | - | - |
| - | 18,778,918 | INTERGENIC | T | C | - | - |
| - | 18,778,976 | INTERGENIC | T | G | - | - |
| - | 18,779,032 | INTERGENIC | T | C | - | - |
| - | 18,779,214 | INTERGENIC | A | C | - | - |
| - | 18,779,219 | INTERGENIC | T | C | - | - |
| - | 18,779,302 | INTERGENIC | C | G | - | - |
| - | 18,779,320 | INTERGENIC | A | C | - | - |
| - | 18,779,338 | INTERGENIC | A | C | - | - |
| - | 18,779,421 | INTERGENIC | A | G | - | - |
| - | 18,779,487 | INTERGENIC | T | C | - | - |
| - | 18,779,502 | INTERGENIC | G | A | - | - |
| - | 18,779,531 | INTERGENIC | C | A | - | - |
| - | 18,779,550 | INTERGENIC | T | C | - | - |
| - | 18,779,629 | INTERGENIC | C | T | - | - |



|   |            |            |   |   |   |   |
|---|------------|------------|---|---|---|---|
| - | 18,779,632 | INTERGENIC | T | G | - | - |
| - | 18,779,634 | INTERGENIC | T | C | - | - |
| - | 18,779,726 | INTERGENIC | T | C | - | - |
| - | 18,779,750 | INTERGENIC | G | A | - | - |
| - | 18,779,763 | INTERGENIC | T | C | - | - |
| - | 18,779,779 | INTERGENIC | A | C | - | - |
| - | 18,779,830 | INTERGENIC | T | G | - | - |
| - | 18,779,893 | INTERGENIC | C | T | - | - |
| - | 18,779,922 | INTERGENIC | A | G | - | - |
| - | 18,780,023 | INTERGENIC | T | C | - | - |
| - | 18,780,096 | INTERGENIC | T | A | - | - |
| - | 18,780,106 | INTERGENIC | C | A | - | - |
| - | 18,780,239 | INTERGENIC | T | C | - | - |
| - | 18,780,336 | INTERGENIC | G | A | - | - |
| - | 18,780,344 | INTERGENIC | C | T | - | - |
| - | 18,780,370 | INTERGENIC | C | A | - | - |
| - | 18,780,386 | INTERGENIC | A | G | - | - |
| - | 18,780,407 | INTERGENIC | A | G | - | - |
| - | 18,780,435 | INTERGENIC | G | A | - | - |
| - | 18,780,459 | INTERGENIC | T | C | - | - |
| - | 18,780,545 | INTERGENIC | A | G | - | - |
| - | 18,780,584 | INTERGENIC | A | G | - | - |
| - | 18,780,598 | INTERGENIC | G | A | - | - |
| - | 18,780,641 | INTERGENIC | A | T | - | - |
| - | 18,780,710 | INTERGENIC | A | C | - | - |
| - | 18,780,783 | INTERGENIC | G | T | - | - |
| - | 18,780,804 | INTERGENIC | T | A | - | - |
| - | 18,780,821 | INTERGENIC | A | T | - | - |
| - | 18,780,843 | INTERGENIC | A | T | - | - |
| - | 18,780,844 | INTERGENIC | A | G | - | - |
| - | 18,780,874 | INTERGENIC | G | A | - | - |
| - | 18,780,899 | INTERGENIC | A | G | - | - |
| - | 18,780,932 | INTERGENIC | A | C | - | - |
| - | 18,780,964 | INTERGENIC | A | G | - | - |
| - | 18,780,978 | INTERGENIC | T | C | - | - |
| - | 18,781,002 | INTERGENIC | A | T | - | - |
| - | 18,781,003 | INTERGENIC | A | G | - | - |
| - | 18,781,116 | INTERGENIC | T | G | - | - |
| - | 18,781,158 | INTERGENIC | T | A | - | - |
| - | 18,781,173 | INTERGENIC | G | T | - | - |
| - | 18,781,224 | INTERGENIC | T | C | - | - |
| - | 18,781,248 | INTERGENIC | T | A | - | - |
| - | 18,781,307 | INTERGENIC | T | A | - | - |
| - | 18,781,355 | INTERGENIC | A | T | - | - |
| - | 18,781,360 | INTERGENIC | C | T | - | - |
| - | 18,781,386 | INTERGENIC | G | A | - | - |
| - | 18,781,483 | INTERGENIC | A | G | - | - |
| - | 18,781,577 | INTERGENIC | T | A | - | - |
| - | 18,781,620 | INTERGENIC | G | A | - | - |
| - | 18,781,648 | INTERGENIC | C | T | - | - |
| - | 18,781,672 | INTERGENIC | G | T | - | - |
| - | 18,781,681 | INTERGENIC | T | A | - | - |
| - | 18,781,714 | INTERGENIC | T | A | - | - |
| - | 18,781,736 | INTERGENIC | C | T | - | - |
| - | 18,781,739 | INTERGENIC | G | T | - | - |
| - | 18,781,849 | INTERGENIC | A | T | - | - |
| - | 18,781,859 | INTERGENIC | A | G | - | - |
| - | 18,782,020 | INTERGENIC | T | A | - | - |
| - | 18,782,066 | INTERGENIC | A | T | - | - |
| - | 18,782,078 | INTERGENIC | A | G | - | - |
| - | 18,782,103 | INTERGENIC | A | C | - | - |
| - | 18,782,174 | INTERGENIC | A | C | - | - |
| - | 18,782,199 | INTERGENIC | C | A | - | - |
| - | 18,782,219 | INTERGENIC | G | C | - | - |
| - | 18,782,288 | INTERGENIC | A | G | - | - |
| - | 18,782,310 | INTERGENIC | G | A | - | - |
| - | 18,782,351 | INTERGENIC | A | G | - | - |
| - | 18,782,374 | INTERGENIC | T | C | - | - |
| - | 18,782,375 | INTERGENIC | G | C | - | - |
| - | 18,782,425 | INTERGENIC | T | G | - | - |
| - | 18,782,442 | INTERGENIC | T | G | - | - |
| - | 18,782,453 | INTERGENIC | G | A | - | - |
| - | 18,782,457 | INTERGENIC | T | C | - | - |
| - | 18,782,517 | INTERGENIC | T | A | - | - |
| - | 18,782,601 | INTERGENIC | C | T | - | - |
| - | 18,782,626 | INTERGENIC | T | C | - | - |
| - | 18,782,709 | INTERGENIC | A | G | - | - |
| - | 18,782,728 | INTERGENIC | T | C | - | - |
| - | 18,782,852 | INTERGENIC | C | T | - | - |
| - | 18,782,858 | INTERGENIC | C | T | - | - |

|   |            |            |   |   |   |   |
|---|------------|------------|---|---|---|---|
| - | 18,782,859 | INTERGENIC | C | A | - | - |
| - | 18,782,941 | INTERGENIC | G | A | - | - |
| - | 18,782,943 | INTERGENIC | T | A | - | - |
| - | 18,783,302 | INTERGENIC | G | C | - | - |
| - | 18,783,365 | INTERGENIC | C | A | - | - |
| - | 18,783,419 | INTERGENIC | G | T | - | - |
| - | 18,783,568 | INTERGENIC | C | T | - | - |
| - | 18,783,585 | INTERGENIC | G | C | - | - |
| - | 18,783,620 | INTERGENIC | C | A | - | - |
| - | 18,783,656 | INTERGENIC | A | T | - | - |
| - | 18,783,724 | INTERGENIC | G | A | - | - |
| - | 18,783,748 | INTERGENIC | T | C | - | - |
| - | 18,783,831 | INTERGENIC | C | A | - | - |
| - | 18,783,832 | INTERGENIC | A | G | - | - |
| - | 18,783,844 | INTERGENIC | G | A | - | - |
| - | 18,783,881 | INTERGENIC | C | A | - | - |
| - | 18,783,905 | INTERGENIC | A | G | - | - |
| - | 18,783,950 | INTERGENIC | G | A | - | - |
| - | 18,783,964 | INTERGENIC | G | T | - | - |
| - | 18,783,976 | INTERGENIC | G | A | - | - |
| - | 18,784,176 | INTERGENIC | T | C | - | - |
| - | 18,784,186 | INTERGENIC | T | C | - | - |
| - | 18,784,197 | INTERGENIC | T | A | - | - |
| - | 18,784,301 | INTERGENIC | T | C | - | - |
| - | 18,784,375 | INTERGENIC | A | C | - | - |
| - | 18,784,441 | INTERGENIC | G | T | - | - |
| - | 18,784,535 | INTERGENIC | A | C | - | - |
| - | 18,784,938 | INTERGENIC | C | T | - | - |
| - | 18,785,005 | INTERGENIC | C | A | - | - |
| - | 18,785,128 | INTERGENIC | T | A | - | - |
| - | 18,785,305 | INTERGENIC | G | C | - | - |
| - | 18,786,099 | INTERGENIC | A | G | - | - |
| - | 18,786,128 | INTERGENIC | A | G | - | - |
| - | 18,786,192 | INTERGENIC | C | G | - | - |
| - | 18,786,197 | INTERGENIC | A | G | - | - |
| - | 18,786,256 | INTERGENIC | A | G | - | - |
| - | 18,786,273 | INTERGENIC | T | G | - | - |
| - | 18,788,013 | INTERGENIC | A | T | - | - |
| - | 18,788,042 | INTERGENIC | T | C | - | - |
| - | 18,788,144 | INTERGENIC | C | A | - | - |
| - | 18,788,484 | INTERGENIC | T | C | - | - |
| - | 18,788,525 | INTERGENIC | A | G | - | - |
| - | 18,788,563 | INTERGENIC | C | G | - | - |
| - | 18,788,642 | INTERGENIC | G | A | - | - |
| - | 18,788,671 | INTERGENIC | T | A | - | - |
| - | 18,788,767 | INTERGENIC | C | T | - | - |
| - | 18,788,907 | INTERGENIC | A | T | - | - |
| - | 18,788,967 | INTERGENIC | T | C | - | - |
| - | 18,789,147 | INTERGENIC | C | G | - | - |
| - | 18,789,264 | INTERGENIC | A | T | - | - |
| - | 18,789,287 | INTERGENIC | T | A | - | - |
| - | 18,789,321 | INTERGENIC | C | G | - | - |
| - | 18,789,338 | INTERGENIC | C | T | - | - |
| - | 18,789,385 | INTERGENIC | A | T | - | - |
| - | 18,789,437 | INTERGENIC | T | G | - | - |
| - | 18,789,492 | INTERGENIC | C | G | - | - |
| - | 18,789,542 | INTERGENIC | T | A | - | - |
| - | 18,789,742 | INTERGENIC | C | T | - | - |
| - | 18,789,762 | INTERGENIC | G | A | - | - |
| - | 18,789,789 | INTERGENIC | T | C | - | - |
| - | 18,789,790 | INTERGENIC | G | A | - | - |
| - | 18,789,795 | INTERGENIC | G | A | - | - |
| - | 18,789,813 | INTERGENIC | A | G | - | - |
| - | 18,789,821 | INTERGENIC | G | T | - | - |
| - | 18,790,008 | INTERGENIC | C | T | - | - |
| - | 18,790,014 | INTERGENIC | C | A | - | - |
| - | 18,790,225 | INTERGENIC | A | T | - | - |
| - | 18,790,275 | INTERGENIC | T | C | - | - |
| - | 18,790,307 | INTERGENIC | C | T | - | - |
| - | 18,790,549 | INTERGENIC | C | A | - | - |
| - | 18,790,586 | INTERGENIC | G | A | - | - |
| - | 18,790,609 | INTERGENIC | G | C | - | - |
| - | 18,790,672 | INTERGENIC | G | A | - | - |
| - | 18,792,038 | INTERGENIC | A | G | - | - |
| - | 18,792,118 | INTERGENIC | G | A | - | - |
| - | 18,792,151 | INTERGENIC | C | T | - | - |
| - | 18,792,160 | INTERGENIC | G | T | - | - |
| - | 18,792,228 | INTERGENIC | G | A | - | - |
| - | 18,792,266 | INTERGENIC | A | G | - | - |
| - | 18,792,269 | INTERGENIC | G | C | - | - |

|   |            |            |   |   |   |   |
|---|------------|------------|---|---|---|---|
| - | 18,792,325 | INTERGENIC | A | C | - | - |
| - | 18,792,353 | INTERGENIC | G | C | - | - |
| - | 18,792,441 | INTERGENIC | G | A | - | - |
| - | 18,792,497 | INTERGENIC | A | T | - | - |
| - | 18,792,527 | INTERGENIC | T | G | - | - |
| - | 18,792,645 | INTERGENIC | G | T | - | - |
| - | 18,792,653 | INTERGENIC | G | A | - | - |
| - | 18,792,795 | INTERGENIC | A | T | - | - |
| - | 18,792,973 | INTERGENIC | A | G | - | - |
| - | 18,793,081 | INTERGENIC | C | G | - | - |
| - | 18,793,110 | INTERGENIC | A | G | - | - |
| - | 18,793,136 | INTERGENIC | A | T | - | - |
| - | 18,793,172 | INTERGENIC | C | A | - | - |
| - | 18,793,634 | INTERGENIC | A | T | - | - |
| - | 18,793,765 | INTERGENIC | C | T | - | - |
| - | 18,793,798 | INTERGENIC | T | G | - | - |
| - | 18,793,803 | INTERGENIC | G | A | - | - |
| - | 18,793,811 | INTERGENIC | C | T | - | - |
| - | 18,793,831 | INTERGENIC | C | A | - | - |
| - | 18,793,901 | INTERGENIC | G | A | - | - |
| - | 18,793,907 | INTERGENIC | A | G | - | - |
| - | 18,793,958 | INTERGENIC | A | T | - | - |
| - | 18,794,070 | INTERGENIC | C | G | - | - |
| - | 18,799,080 | INTERGENIC | A | C | - | - |
| - | 18,799,092 | INTERGENIC | T | A | - | - |
| - | 18,800,992 | INTERGENIC | C | A | - | - |
| - | 18,806,097 | INTERGENIC | C | T | - | - |
| - | 18,806,117 | INTERGENIC | C | T | - | - |
| - | 18,806,203 | INTERGENIC | C | T | - | - |
| - | 18,806,229 | INTERGENIC | G | A | - | - |
| - | 18,806,931 | INTERGENIC | T | A | - | - |
| - | 18,806,947 | INTERGENIC | C | G | - | - |
| - | 18,806,968 | INTERGENIC | A | G | - | - |
| - | 18,806,969 | INTERGENIC | T | C | - | - |
| - | 18,806,990 | INTERGENIC | G | A | - | - |
| - | 18,807,153 | INTERGENIC | G | T | - | - |
| - | 18,807,220 | INTERGENIC | G | A | - | - |
| - | 18,810,257 | INTERGENIC | T | C | - | - |
| - | 18,810,264 | INTERGENIC | A | T | - | - |
| - | 18,810,543 | INTERGENIC | T | C | - | - |
| - | 18,810,695 | INTERGENIC | T | A | - | - |
| - | 18,810,951 | INTERGENIC | A | C | - | - |
| - | 18,810,977 | INTERGENIC | T | G | - | - |
| - | 18,810,995 | INTERGENIC | C | T | - | - |
| - | 18,811,089 | INTERGENIC | T | C | - | - |
| - | 18,811,176 | INTERGENIC | C | T | - | - |
| - | 18,811,232 | INTERGENIC | C | T | - | - |
| - | 18,811,311 | INTERGENIC | A | G | - | - |
| - | 18,811,440 | INTERGENIC | G | C | - | - |
| - | 18,811,809 | INTERGENIC | C | T | - | - |
| - | 18,811,812 | INTERGENIC | G | T | - | - |
| - | 18,811,884 | INTERGENIC | G | T | - | - |
| - | 18,811,943 | INTERGENIC | G | A | - | - |
| - | 18,811,956 | INTERGENIC | T | C | - | - |
| - | 18,811,993 | INTERGENIC | C | G | - | - |
| - | 18,812,083 | INTERGENIC | A | T | - | - |
| - | 18,812,095 | INTERGENIC | A | T | - | - |
| - | 18,812,132 | INTERGENIC | G | A | - | - |
| - | 18,812,179 | INTERGENIC | T | C | - | - |
| - | 18,812,272 | INTERGENIC | A | T | - | - |
| - | 18,812,301 | INTERGENIC | G | T | - | - |
| - | 18,812,312 | INTERGENIC | G | C | - | - |
| - | 18,812,373 | INTERGENIC | T | C | - | - |
| - | 18,812,459 | INTERGENIC | T | C | - | - |
| - | 18,812,517 | INTERGENIC | T | G | - | - |
| - | 18,812,573 | INTERGENIC | G | C | - | - |
| - | 18,812,640 | INTERGENIC | T | C | - | - |
| - | 18,812,655 | INTERGENIC | T | C | - | - |
| - | 18,812,798 | INTERGENIC | G | A | - | - |
| - | 18,812,849 | INTERGENIC | A | C | - | - |
| - | 18,812,871 | INTERGENIC | C | A | - | - |
| - | 18,812,950 | INTERGENIC | C | T | - | - |
| - | 18,812,977 | INTERGENIC | A | G | - | - |
| - | 18,813,007 | INTERGENIC | A | G | - | - |
| - | 18,813,008 | INTERGENIC | C | G | - | - |
| - | 18,813,192 | INTERGENIC | C | G | - | - |
| - | 18,813,211 | INTERGENIC | G | A | - | - |
| - | 18,813,422 | INTERGENIC | C | T | - | - |
| - | 18,813,457 | INTERGENIC | T | A | - | - |
| - | 18,813,499 | INTERGENIC | T | A | - | - |

|   |            |            |   |   |   |   |
|---|------------|------------|---|---|---|---|
| - | 18,813,551 | INTERGENIC | T | G | - | - |
| - | 18,813,579 | INTERGENIC | A | G | - | - |
| - | 18,813,601 | INTERGENIC | C | T | - | - |
| - | 18,813,648 | INTERGENIC | C | T | - | - |
| - | 18,813,706 | INTERGENIC | C | A | - | - |
| - | 18,813,735 | INTERGENIC | T | C | - | - |
| - | 18,813,778 | INTERGENIC | C | A | - | - |
| - | 18,813,785 | INTERGENIC | C | A | - | - |
| - | 18,813,825 | INTERGENIC | T | C | - | - |
| - | 18,813,857 | INTERGENIC | G | T | - | - |
| - | 18,813,887 | INTERGENIC | G | C | - | - |
| - | 18,813,898 | INTERGENIC | T | C | - | - |
| - | 18,814,015 | INTERGENIC | C | T | - | - |
| - | 18,814,091 | INTERGENIC | T | C | - | - |
| - | 18,814,107 | INTERGENIC | T | C | - | - |
| - | 18,814,141 | INTERGENIC | G | C | - | - |
| - | 18,814,180 | INTERGENIC | A | G | - | - |
| - | 18,814,220 | INTERGENIC | T | A | - | - |
| - | 18,814,235 | INTERGENIC | G | C | - | - |
| - | 18,814,252 | INTERGENIC | C | T | - | - |
| - | 18,814,284 | INTERGENIC | C | G | - | - |
| - | 18,814,317 | INTERGENIC | T | G | - | - |
| - | 18,814,354 | INTERGENIC | T | C | - | - |
| - | 18,814,378 | INTERGENIC | A | C | - | - |
| - | 18,814,404 | INTERGENIC | G | A | - | - |
| - | 18,814,446 | INTERGENIC | T | G | - | - |
| - | 18,814,518 | INTERGENIC | G | T | - | - |
| - | 18,814,574 | INTERGENIC | A | C | - | - |
| - | 18,814,635 | INTERGENIC | A | C | - | - |
| - | 18,814,772 | INTERGENIC | C | A | - | - |
| - | 18,814,805 | INTERGENIC | G | A | - | - |
| - | 18,814,845 | INTERGENIC | G | A | - | - |
| - | 18,814,846 | INTERGENIC | G | A | - | - |
| - | 18,815,017 | INTERGENIC | A | G | - | - |
| - | 18,815,035 | INTERGENIC | A | G | - | - |
| - | 18,815,109 | INTERGENIC | T | G | - | - |
| - | 18,815,219 | INTERGENIC | C | A | - | - |
| - | 18,815,240 | INTERGENIC | C | T | - | - |
| - | 18,815,284 | INTERGENIC | C | T | - | - |
| - | 18,815,709 | INTERGENIC | A | T | - | - |
| - | 18,815,790 | INTERGENIC | A | G | - | - |
| - | 18,818,690 | INTERGENIC | C | T | - | - |
| - | 18,818,706 | INTERGENIC | A | C | - | - |
| - | 18,818,791 | INTERGENIC | G | C | - | - |
| - | 18,818,876 | INTERGENIC | T | A | - | - |
| - | 18,818,899 | INTERGENIC | G | T | - | - |
| - | 18,819,041 | INTERGENIC | T | A | - | - |
| - | 18,819,046 | INTERGENIC | A | G | - | - |
| - | 18,819,049 | INTERGENIC | A | T | - | - |
| - | 18,819,081 | INTERGENIC | C | A | - | - |
| - | 18,819,102 | INTERGENIC | T | A | - | - |
| - | 18,819,103 | INTERGENIC | T | G | - | - |
| - | 18,819,138 | INTERGENIC | A | C | - | - |
| - | 18,819,197 | INTERGENIC | G | A | - | - |
| - | 18,819,198 | INTERGENIC | A | C | - | - |
| - | 18,819,203 | INTERGENIC | T | C | - | - |
| - | 18,819,268 | INTERGENIC | T | C | - | - |
| - | 18,819,283 | INTERGENIC | T | G | - | - |
| - | 18,819,373 | INTERGENIC | G | A | - | - |
| - | 18,819,380 | INTERGENIC | A | C | - | - |
| - | 18,819,414 | INTERGENIC | T | A | - | - |
| - | 18,819,477 | INTERGENIC | A | T | - | - |
| - | 18,819,481 | INTERGENIC | A | C | - | - |
| - | 18,819,513 | INTERGENIC | C | G | - | - |
| - | 18,819,525 | INTERGENIC | A | G | - | - |
| - | 18,819,565 | INTERGENIC | G | T | - | - |
| - | 18,819,574 | INTERGENIC | T | A | - | - |
| - | 18,819,818 | INTERGENIC | C | G | - | - |
| - | 18,819,820 | INTERGENIC | A | T | - | - |
| - | 18,819,829 | INTERGENIC | T | C | - | - |
| - | 18,819,917 | INTERGENIC | C | T | - | - |
| - | 18,819,925 | INTERGENIC | C | T | - | - |
| - | 18,820,214 | INTERGENIC | C | G | - | - |
| - | 18,820,221 | INTERGENIC | T | A | - | - |
| - | 18,820,277 | INTERGENIC | G | A | - | - |
| - | 18,820,509 | INTERGENIC | T | G | - | - |
| - | 18,820,510 | INTERGENIC | T | A | - | - |
| - | 18,820,876 | INTERGENIC | C | G | - | - |
| - | 18,820,928 | INTERGENIC | T | G | - | - |
| - | 18,820,962 | INTERGENIC | C | T | - | - |

|   |            |            |   |   |   |   |
|---|------------|------------|---|---|---|---|
| - | 18,820,986 | INTERGENIC | A | G | - | - |
| - | 18,820,989 | INTERGENIC | C | A | - | - |
| - | 18,821,012 | INTERGENIC | A | C | - | - |
| - | 18,821,052 | INTERGENIC | G | C | - | - |
| - | 18,821,186 | INTERGENIC | A | G | - | - |
| - | 18,821,195 | INTERGENIC | C | T | - | - |
| - | 18,821,274 | INTERGENIC | C | G | - | - |
| - | 18,821,285 | INTERGENIC | A | G | - | - |
| - | 18,821,390 | INTERGENIC | C | A | - | - |
| - | 18,821,434 | INTERGENIC | G | A | - | - |
| - | 18,821,439 | INTERGENIC | C | T | - | - |
| - | 18,821,465 | INTERGENIC | C | A | - | - |
| - | 18,822,000 | INTERGENIC | A | G | - | - |
| - | 18,822,308 | INTERGENIC | C | A | - | - |
| - | 18,822,310 | INTERGENIC | T | C | - | - |
| - | 18,822,342 | INTERGENIC | G | A | - | - |
| - | 18,822,417 | INTERGENIC | T | G | - | - |
| - | 18,822,868 | INTERGENIC | T | C | - | - |
| - | 18,823,078 | INTERGENIC | A | G | - | - |
| - | 18,823,124 | INTERGENIC | A | G | - | - |
| - | 18,823,126 | INTERGENIC | A | G | - | - |
| - | 18,823,164 | INTERGENIC | A | G | - | - |
| - | 18,823,199 | INTERGENIC | C | G | - | - |
| - | 18,823,223 | INTERGENIC | T | A | - | - |
| - | 18,823,276 | INTERGENIC | A | C | - | - |
| - | 18,823,336 | INTERGENIC | C | T | - | - |
| - | 18,823,343 | INTERGENIC | A | G | - | - |
| - | 18,823,412 | INTERGENIC | A | G | - | - |
| - | 18,823,413 | INTERGENIC | G | A | - | - |
| - | 18,823,606 | INTERGENIC | A | G | - | - |
| - | 18,823,649 | INTERGENIC | T | G | - | - |
| - | 18,823,771 | INTERGENIC | C | T | - | - |
| - | 18,823,817 | INTERGENIC | T | C | - | - |
| - | 18,824,000 | INTERGENIC | G | A | - | - |
| - | 18,824,053 | INTERGENIC | G | T | - | - |
| - | 18,824,094 | INTERGENIC | A | G | - | - |
| - | 18,824,154 | INTERGENIC | T | C | - | - |
| - | 18,824,189 | INTERGENIC | C | T | - | - |
| - | 18,824,193 | INTERGENIC | G | A | - | - |
| - | 18,824,273 | INTERGENIC | G | T | - | - |
| - | 18,824,295 | INTERGENIC | T | C | - | - |
| - | 18,824,370 | INTERGENIC | G | T | - | - |
| - | 18,824,445 | INTERGENIC | T | A | - | - |
| - | 18,824,491 | INTERGENIC | T | G | - | - |
| - | 18,824,533 | INTERGENIC | C | T | - | - |
| - | 18,824,548 | INTERGENIC | G | A | - | - |
| - | 18,824,554 | INTERGENIC | C | A | - | - |
| - | 18,824,742 | INTERGENIC | G | A | - | - |
| - | 18,824,802 | INTERGENIC | T | A | - | - |
| - | 18,824,895 | INTERGENIC | T | C | - | - |
| - | 18,824,935 | INTERGENIC | T | G | - | - |
| - | 18,824,953 | INTERGENIC | T | G | - | - |
| - | 18,825,014 | INTERGENIC | T | G | - | - |
| - | 18,825,074 | INTERGENIC | G | C | - | - |
| - | 18,825,322 | INTERGENIC | G | T | - | - |
| - | 18,825,336 | INTERGENIC | T | C | - | - |
| - | 18,825,368 | INTERGENIC | C | T | - | - |
| - | 18,825,389 | INTERGENIC | G | C | - | - |
| - | 18,825,636 | INTERGENIC | T | G | - | - |
| - | 18,825,668 | INTERGENIC | C | T | - | - |
| - | 18,825,709 | INTERGENIC | T | C | - | - |
| - | 18,825,710 | INTERGENIC | G | A | - | - |
| - | 18,825,802 | INTERGENIC | G | A | - | - |
| - | 18,825,882 | INTERGENIC | G | T | - | - |
| - | 18,825,891 | INTERGENIC | G | T | - | - |
| - | 18,825,937 | INTERGENIC | C | A | - | - |
| - | 18,826,205 | INTERGENIC | C | T | - | - |
| - | 18,826,213 | INTERGENIC | T | C | - | - |
| - | 18,826,320 | INTERGENIC | G | A | - | - |
| - | 18,826,323 | INTERGENIC | T | A | - | - |
| - | 18,826,352 | INTERGENIC | A | G | - | - |
| - | 18,826,417 | INTERGENIC | T | C | - | - |
| - | 18,826,481 | INTERGENIC | T | C | - | - |
| - | 18,826,569 | INTERGENIC | T | C | - | - |
| - | 18,826,631 | INTERGENIC | T | C | - | - |
| - | 18,826,744 | INTERGENIC | G | A | - | - |
| - | 18,826,791 | INTERGENIC | A | T | - | - |
| - | 18,826,874 | INTERGENIC | G | A | - | - |
| - | 18,826,959 | INTERGENIC | C | A | - | - |
| - | 18,827,152 | INTERGENIC | T | A | - | - |

|   |            |            |   |   |   |   |
|---|------------|------------|---|---|---|---|
| - | 18,827,161 | INTERGENIC | T | A | - | - |
| - | 18,827,191 | INTERGENIC | G | A | - | - |
| - | 18,827,372 | INTERGENIC | C | G | - | - |
| - | 18,827,414 | INTERGENIC | G | T | - | - |
| - | 18,827,506 | INTERGENIC | A | G | - | - |
| - | 18,827,553 | INTERGENIC | G | C | - | - |
| - | 18,827,634 | INTERGENIC | C | A | - | - |
| - | 18,827,656 | INTERGENIC | C | T | - | - |
| - | 18,827,740 | INTERGENIC | A | T | - | - |
| - | 18,827,812 | INTERGENIC | T | A | - | - |
| - | 18,827,862 | INTERGENIC | G | A | - | - |
| - | 18,827,867 | INTERGENIC | T | A | - | - |
| - | 18,827,894 | INTERGENIC | G | A | - | - |
| - | 18,827,901 | INTERGENIC | G | A | - | - |
| - | 18,827,999 | INTERGENIC | A | G | - | - |
| - | 18,828,021 | INTERGENIC | T | G | - | - |
| - | 18,828,078 | INTERGENIC | G | C | - | - |
| - | 18,828,216 | INTERGENIC | A | T | - | - |
| - | 18,828,299 | INTERGENIC | T | A | - | - |
| - | 18,828,325 | INTERGENIC | A | G | - | - |
| - | 18,828,361 | INTERGENIC | A | G | - | - |
| - | 18,828,390 | INTERGENIC | C | T | - | - |
| - | 18,828,452 | INTERGENIC | T | A | - | - |
| - | 18,828,514 | INTERGENIC | C | A | - | - |
| - | 18,828,789 | INTERGENIC | G | A | - | - |
| - | 18,828,830 | INTERGENIC | T | C | - | - |
| - | 18,828,905 | INTERGENIC | T | G | - | - |
| - | 18,828,970 | INTERGENIC | C | T | - | - |
| - | 18,829,053 | INTERGENIC | T | G | - | - |
| - | 18,829,134 | INTERGENIC | A | G | - | - |
| - | 18,829,157 | INTERGENIC | A | G | - | - |
| - | 18,829,475 | INTERGENIC | A | G | - | - |
| - | 18,829,612 | INTERGENIC | G | C | - | - |
| - | 18,829,722 | INTERGENIC | A | G | - | - |
| - | 18,829,767 | INTERGENIC | A | G | - | - |
| - | 18,829,778 | INTERGENIC | T | C | - | - |
| - | 18,829,799 | INTERGENIC | A | T | - | - |
| - | 18,829,821 | INTERGENIC | C | A | - | - |
| - | 18,829,864 | INTERGENIC | G | A | - | - |
| - | 18,829,867 | INTERGENIC | A | G | - | - |
| - | 18,829,892 | INTERGENIC | G | A | - | - |
| - | 18,829,905 | INTERGENIC | G | T | - | - |
| - | 18,830,177 | INTERGENIC | G | T | - | - |
| - | 18,830,218 | INTERGENIC | G | T | - | - |
| - | 18,830,243 | INTERGENIC | G | A | - | - |
| - | 18,830,330 | INTERGENIC | C | T | - | - |
| - | 18,830,380 | INTERGENIC | A | T | - | - |
| - | 18,830,501 | INTERGENIC | G | A | - | - |
| - | 18,830,525 | INTERGENIC | A | C | - | - |
| - | 18,830,537 | INTERGENIC | A | C | - | - |
| - | 18,830,851 | INTERGENIC | G | T | - | - |
| - | 18,830,900 | INTERGENIC | T | C | - | - |
| - | 18,830,906 | INTERGENIC | C | T | - | - |
| - | 18,830,941 | INTERGENIC | A | G | - | - |
| - | 18,831,012 | INTERGENIC | T | G | - | - |
| - | 18,831,071 | INTERGENIC | A | G | - | - |
| - | 18,831,202 | INTERGENIC | T | G | - | - |
| - | 18,831,235 | INTERGENIC | G | C | - | - |
| - | 18,831,273 | INTERGENIC | C | T | - | - |
| - | 18,831,292 | INTERGENIC | G | A | - | - |
| - | 18,831,301 | INTERGENIC | C | T | - | - |
| - | 18,831,448 | INTERGENIC | G | T | - | - |
| - | 18,831,517 | INTERGENIC | C | A | - | - |
| - | 18,831,567 | INTERGENIC | T | C | - | - |
| - | 18,831,718 | INTERGENIC | C | T | - | - |
| - | 18,831,990 | INTERGENIC | C | T | - | - |
| - | 18,832,005 | INTERGENIC | A | G | - | - |
| - | 18,832,030 | INTERGENIC | A | T | - | - |
| - | 18,832,066 | INTERGENIC | C | G | - | - |
| - | 18,832,202 | INTERGENIC | T | C | - | - |
| - | 18,832,231 | INTERGENIC | A | G | - | - |
| - | 18,832,351 | INTERGENIC | C | A | - | - |
| - | 18,832,428 | INTERGENIC | C | A | - | - |
| - | 18,832,448 | INTERGENIC | A | G | - | - |
| - | 18,832,462 | INTERGENIC | C | A | - | - |
| - | 18,832,484 | INTERGENIC | T | C | - | - |
| - | 18,832,546 | INTERGENIC | G | A | - | - |
| - | 18,832,558 | INTERGENIC | A | T | - | - |
| - | 18,832,570 | INTERGENIC | A | C | - | - |
| - | 18,832,643 | INTERGENIC | T | C | - | - |

|   |            |            |   |   |   |   |
|---|------------|------------|---|---|---|---|
| - | 18,832,681 | INTERGENIC | A | G | - | - |
| - | 18,832,778 | INTERGENIC | G | A | - | - |
| - | 18,832,798 | INTERGENIC | G | T | - | - |
| - | 18,832,870 | INTERGENIC | T | C | - | - |
| - | 18,832,886 | INTERGENIC | T | C | - | - |
| - | 18,833,764 | INTERGENIC | G | C | - | - |
| - | 18,833,903 | INTERGENIC | A | T | - | - |
| - | 18,833,925 | INTERGENIC | G | A | - | - |
| - | 18,834,215 | INTERGENIC | A | G | - | - |
| - | 18,834,359 | INTERGENIC | T | C | - | - |
| - | 18,834,399 | INTERGENIC | A | C | - | - |
| - | 18,834,454 | INTERGENIC | G | C | - | - |
| - | 18,834,505 | INTERGENIC | T | G | - | - |
| - | 18,834,590 | INTERGENIC | A | C | - | - |
| - | 18,834,692 | INTERGENIC | T | A | - | - |
| - | 18,834,699 | INTERGENIC | G | A | - | - |
| - | 18,834,782 | INTERGENIC | T | C | - | - |
| - | 18,834,821 | INTERGENIC | T | G | - | - |
| - | 18,834,863 | INTERGENIC | T | A | - | - |
| - | 18,834,957 | INTERGENIC | A | G | - | - |
| - | 18,835,083 | INTERGENIC | G | T | - | - |
| - | 18,835,128 | INTERGENIC | T | G | - | - |
| - | 18,835,239 | INTERGENIC | G | T | - | - |
| - | 18,835,251 | INTERGENIC | C | T | - | - |
| - | 18,835,305 | INTERGENIC | T | C | - | - |
| - | 18,835,340 | INTERGENIC | A | G | - | - |
| - | 18,835,379 | INTERGENIC | A | C | - | - |
| - | 18,835,417 | INTERGENIC | T | A | - | - |
| - | 18,835,453 | INTERGENIC | C | T | - | - |
| - | 18,835,657 | INTERGENIC | A | G | - | - |
| - | 18,835,755 | INTERGENIC | T | A | - | - |
| - | 18,835,871 | INTERGENIC | A | G | - | - |
| - | 18,836,345 | INTERGENIC | T | G | - | - |
| - | 18,836,414 | INTERGENIC | C | A | - | - |
| - | 18,836,567 | INTERGENIC | G | A | - | - |
| - | 18,836,710 | INTERGENIC | C | A | - | - |
| - | 18,836,884 | INTERGENIC | G | A | - | - |
| - | 18,836,894 | INTERGENIC | G | A | - | - |
| - | 18,836,955 | INTERGENIC | G | T | - | - |
| - | 18,837,026 | INTERGENIC | T | C | - | - |
| - | 18,837,125 | INTERGENIC | T | A | - | - |
| - | 18,837,216 | INTERGENIC | A | C | - | - |
| - | 18,837,222 | INTERGENIC | A | T | - | - |
| - | 18,837,306 | INTERGENIC | G | T | - | - |
| - | 18,837,318 | INTERGENIC | G | A | - | - |
| - | 18,837,593 | INTERGENIC | C | T | - | - |
| - | 18,837,602 | INTERGENIC | A | T | - | - |
| - | 18,837,693 | INTERGENIC | A | T | - | - |
| - | 18,837,699 | INTERGENIC | A | G | - | - |
| - | 18,837,782 | INTERGENIC | T | C | - | - |
| - | 18,837,796 | INTERGENIC | T | C | - | - |
| - | 18,837,848 | INTERGENIC | A | G | - | - |
| - | 18,837,894 | INTERGENIC | T | C | - | - |
| - | 18,837,929 | INTERGENIC | T | G | - | - |
| - | 18,838,035 | INTERGENIC | T | C | - | - |
| - | 18,838,089 | INTERGENIC | C | T | - | - |
| - | 18,838,098 | INTERGENIC | C | A | - | - |
| - | 18,838,195 | INTERGENIC | T | C | - | - |
| - | 18,838,320 | INTERGENIC | T | A | - | - |
| - | 18,838,409 | INTERGENIC | G | A | - | - |
| - | 18,838,478 | INTERGENIC | G | A | - | - |
| - | 18,838,493 | INTERGENIC | G | T | - | - |
| - | 18,838,535 | INTERGENIC | A | C | - | - |
| - | 18,838,716 | INTERGENIC | G | T | - | - |
| - | 18,838,935 | INTERGENIC | C | A | - | - |
| - | 18,839,064 | INTERGENIC | C | T | - | - |
| - | 18,839,448 | INTERGENIC | G | A | - | - |
| - | 18,839,629 | INTERGENIC | A | G | - | - |
| - | 18,839,841 | INTERGENIC | G | T | - | - |
| - | 18,839,912 | INTERGENIC | A | T | - | - |
| - | 18,839,967 | INTERGENIC | A | G | - | - |
| - | 18,840,093 | INTERGENIC | C | T | - | - |
| - | 18,840,148 | INTERGENIC | T | C | - | - |
| - | 18,840,188 | INTERGENIC | C | T | - | - |
| - | 18,840,387 | INTERGENIC | T | G | - | - |
| - | 18,840,521 | INTERGENIC | G | A | - | - |
| - | 18,840,523 | INTERGENIC | C | A | - | - |
| - | 18,840,564 | INTERGENIC | C | G | - | - |
| - | 18,840,695 | INTERGENIC | G | C | - | - |
| - | 18,841,069 | INTERGENIC | G | T | - | - |

|   |            |            |   |   |   |   |
|---|------------|------------|---|---|---|---|
| - | 18,841,208 | INTERGENIC | T | C | - | - |
| - | 18,841,227 | INTERGENIC | G | C | - | - |
| - | 18,841,351 | INTERGENIC | C | A | - | - |
| - | 18,841,384 | INTERGENIC | T | G | - | - |
| - | 18,841,399 | INTERGENIC | C | G | - | - |
| - | 18,841,445 | INTERGENIC | T | C | - | - |
| - | 18,841,492 | INTERGENIC | T | C | - | - |
| - | 18,841,522 | INTERGENIC | C | T | - | - |
| - | 18,841,700 | INTERGENIC | T | G | - | - |
| - | 18,841,840 | INTERGENIC | G | A | - | - |
| - | 18,842,045 | INTERGENIC | T | G | - | - |
| - | 18,842,233 | INTERGENIC | G | A | - | - |
| - | 18,842,510 | INTERGENIC | T | G | - | - |
| - | 18,842,526 | INTERGENIC | C | A | - | - |
| - | 18,842,553 | INTERGENIC | G | C | - | - |
| - | 18,842,596 | INTERGENIC | T | C | - | - |
| - | 18,842,616 | INTERGENIC | C | T | - | - |
| - | 18,842,707 | INTERGENIC | A | T | - | - |
| - | 18,842,833 | INTERGENIC | A | G | - | - |
| - | 18,842,855 | INTERGENIC | G | T | - | - |
| - | 18,842,876 | INTERGENIC | T | A | - | - |
| - | 18,842,998 | INTERGENIC | T | G | - | - |
| - | 18,843,026 | INTERGENIC | C | T | - | - |
| - | 18,843,029 | INTERGENIC | T | G | - | - |
| - | 18,843,140 | INTERGENIC | T | A | - | - |
| - | 18,843,148 | INTERGENIC | G | C | - | - |
| - | 18,843,151 | INTERGENIC | T | G | - | - |
| - | 18,843,193 | INTERGENIC | A | G | - | - |
| - | 18,843,246 | INTERGENIC | G | T | - | - |
| - | 18,843,302 | INTERGENIC | C | G | - | - |
| - | 18,843,355 | INTERGENIC | T | C | - | - |
| - | 18,843,604 | INTERGENIC | C | T | - | - |
| - | 18,843,681 | INTERGENIC | G | A | - | - |
| - | 18,843,714 | INTERGENIC | G | A | - | - |
| - | 18,843,802 | INTERGENIC | G | A | - | - |
| - | 18,843,889 | INTERGENIC | G | A | - | - |
| - | 18,844,369 | INTERGENIC | G | T | - | - |
| - | 18,844,440 | INTERGENIC | T | G | - | - |
| - | 18,844,453 | INTERGENIC | T | C | - | - |
| - | 18,844,475 | INTERGENIC | A | G | - | - |
| - | 18,844,536 | INTERGENIC | C | T | - | - |
| - | 18,844,579 | INTERGENIC | T | G | - | - |
| - | 18,844,716 | INTERGENIC | C | A | - | - |
| - | 18,844,746 | INTERGENIC | C | A | - | - |
| - | 18,844,824 | INTERGENIC | G | A | - | - |
| - | 18,844,974 | INTERGENIC | A | G | - | - |
| - | 18,845,041 | INTERGENIC | G | T | - | - |
| - | 18,845,051 | INTERGENIC | G | T | - | - |
| - | 18,845,127 | INTERGENIC | G | A | - | - |
| - | 18,845,346 | INTERGENIC | G | A | - | - |
| - | 18,845,619 | INTERGENIC | C | A | - | - |
| - | 18,845,688 | INTERGENIC | T | A | - | - |
| - | 18,845,778 | INTERGENIC | G | A | - | - |
| - | 18,845,826 | INTERGENIC | T | C | - | - |
| - | 18,845,932 | INTERGENIC | A | G | - | - |
| - | 18,846,004 | INTERGENIC | A | G | - | - |
| - | 18,846,008 | INTERGENIC | C | G | - | - |
| - | 18,846,430 | INTERGENIC | G | C | - | - |
| - | 18,846,495 | INTERGENIC | C | A | - | - |
| - | 18,846,506 | INTERGENIC | A | G | - | - |
| - | 18,846,611 | INTERGENIC | A | G | - | - |
| - | 18,846,618 | INTERGENIC | C | T | - | - |
| - | 18,846,666 | INTERGENIC | A | T | - | - |
| - | 18,846,711 | INTERGENIC | T | C | - | - |
| - | 18,846,832 | INTERGENIC | C | T | - | - |
| - | 18,846,996 | INTERGENIC | C | T | - | - |
| - | 18,847,053 | INTERGENIC | T | C | - | - |
| - | 18,847,149 | INTERGENIC | C | T | - | - |
| - | 18,847,227 | INTERGENIC | A | T | - | - |
| - | 18,847,232 | INTERGENIC | A | T | - | - |
| - | 18,847,289 | INTERGENIC | C | T | - | - |
| - | 18,847,330 | INTERGENIC | C | T | - | - |
| - | 18,847,705 | INTERGENIC | C | T | - | - |
| - | 18,847,992 | INTERGENIC | G | C | - | - |
| - | 18,847,994 | INTERGENIC | A | G | - | - |
| - | 18,848,571 | INTERGENIC | C | T | - | - |
| - | 18,848,619 | INTERGENIC | C | A | - | - |
| - | 18,848,681 | INTERGENIC | C | T | - | - |
| - | 18,848,824 | INTERGENIC | A | T | - | - |
| - | 18,848,969 | INTERGENIC | A | G | - | - |



|            |                    |            |                       |   |   |   |   |
|------------|--------------------|------------|-----------------------|---|---|---|---|
| RGD1559730 | ENSRNOT00000037646 | 18,849,154 | UPSTREAM              | T | C | - | - |
| RGD1559730 | ENSRNOT00000037646 | 18,849,165 | UPSTREAM              | A | G | - | - |
| RGD1559730 | ENSRNOT00000037646 | 18,849,305 | UPSTREAM              | A | C | - | - |
| RGD1559730 | ENSRNOT00000037646 | 18,849,430 | UPSTREAM              | G | A | - | - |
| RGD1559730 | ENSRNOT00000037646 | 18,849,453 | UPSTREAM              | C | T | - | - |
| RGD1559730 | ENSRNOT00000037646 | 18,849,534 | UPSTREAM              | G | A | - | - |
| RGD1559730 | ENSRNOT00000037646 | 18,849,764 | UPSTREAM              | C | G | - | - |
| RGD1559730 | ENSRNOT00000037646 | 18,850,030 | UPSTREAM              | G | A | - | - |
| RGD1559730 | ENSRNOT00000037646 | 18,850,053 | UPSTREAM              | G | C | - | - |
| RGD1559730 | ENSRNOT00000037646 | 18,850,496 | UPSTREAM              | G | A | - | - |
| RGD1559730 | ENSRNOT00000037646 | 18,850,752 | UPSTREAM              | T | C | - | - |
| RGD1559730 | ENSRNOT00000037646 | 18,850,763 | UPSTREAM              | A | G | - | - |
| RGD1559730 | ENSRNOT00000037646 | 18,850,774 | UPSTREAM              | T | C | - | - |
| RGD1559730 | ENSRNOT00000037646 | 18,850,847 | UPSTREAM              | C | T | - | - |
| RGD1559730 | ENSRNOT00000037646 | 18,850,864 | UPSTREAM              | T | C | - | - |
| RGD1559730 | ENSRNOT00000037646 | 18,851,277 | UPSTREAM              | C | G | - | - |
| RGD1559730 | ENSRNOT00000037646 | 18,851,427 | UPSTREAM              | T | C | - | - |
| RGD1559730 | ENSRNOT00000037646 | 18,852,798 | UPSTREAM              | G | A | - | - |
| RGD1559730 | ENSRNOT00000037646 | 18,853,577 | UPSTREAM              | G | A | - | - |
| RGD1559730 | ENSRNOT00000037646 | 18,853,691 | UPSTREAM              | C | T | - | - |
| RGD1559730 | ENSRNOT00000037646 | 18,853,754 | UPSTREAM              | A | C | - | - |
| RGD1559730 | ENSRNOT00000037646 | 18,853,898 | UPSTREAM              | G | C | - | - |
| RGD1559730 | ENSRNOT00000037646 | 18,853,988 | UPSTREAM              | C | A | - | - |
| RGD1559730 | ENSRNOT00000037646 | 18,854,016 | UPSTREAM              | A | G | - | - |
| RGD1559730 | ENSRNOT00000037646 | 18,854,200 | SYNONYMOUS_CODING     | C | T | - | - |
| RGD1559730 | ENSRNOT00000037646 | 18,854,640 | NON_SYNONYMOUS_CODING | C | T | T | I |
| RGD1559730 | ENSRNOT00000037646 | 18,854,708 | NON_SYNONYMOUS_CODING | A | G | K | E |
| RGD1559730 | ENSRNOT00000037646 | 18,854,746 | NON_SYNONYMOUS_CODING | G | A | M | I |
| RGD1559730 | ENSRNOT00000037646 | 18,854,748 | NON_SYNONYMOUS_CODING | A | G | D | G |
| RGD1559730 | ENSRNOT00000037646 | 18,854,871 | INTRONIC              | T | A | - | - |
| RGD1559730 | ENSRNOT00000037646 | 18,855,032 | INTRONIC              | A | C | - | - |
| RGD1559730 | ENSRNOT00000037646 | 18,855,187 | INTRONIC              | T | C | - | - |
| RGD1559730 | ENSRNOT00000037646 | 18,855,691 | INTRONIC              | C | A | - | - |
| RGD1559730 | ENSRNOT00000037646 | 18,855,860 | NON_SYNONYMOUS_CODING | C | T | P | L |
| RGD1559730 | ENSRNOT00000037646 | 18,855,948 | SYNONYMOUS_CODING     | G | A | - | - |
| RGD1559730 | ENSRNOT00000037646 | 18,855,953 | NON_SYNONYMOUS_CODING | T | G | V | G |
| RGD1559730 | ENSRNOT00000037646 | 18,856,104 | INTRONIC              | G | T | - | - |
| RGD1559730 | ENSRNOT00000037646 | 18,856,575 | SPLICE_SITE,INTRONIC  | T | C | - | - |
| RGD1559730 | ENSRNOT00000037646 | 18,856,604 | INTRONIC              | G | C | - | - |
| RGD1559730 | ENSRNOT00000037646 | 18,857,583 | INTRONIC              | T | A | - | - |
| RGD1559730 | ENSRNOT00000037646 | 18,857,958 | INTRONIC              | A | G | - | - |
| RGD1559730 | ENSRNOT00000037646 | 18,858,159 | INTRONIC              | A | G | - | - |
| RGD1559730 | ENSRNOT00000037646 | 18,858,344 | INTRONIC              | C | T | - | - |
| RGD1559730 | ENSRNOT00000037646 | 18,858,437 | INTRONIC              | G | T | - | - |
| RGD1559730 | ENSRNOT00000037646 | 18,858,438 | INTRONIC              | A | T | - | - |
| RGD1559730 | ENSRNOT00000037646 | 18,858,485 | INTRONIC              | A | T | - | - |
| RGD1559730 | ENSRNOT00000037646 | 18,858,567 | INTRONIC              | A | C | - | - |
| RGD1559730 | ENSRNOT00000037646 | 18,858,728 | INTRONIC              | A | T | - | - |
| RGD1559730 | ENSRNOT00000037646 | 18,858,735 | INTRONIC              | T | C | - | - |
| RGD1559730 | ENSRNOT00000037646 | 18,858,946 | INTRONIC              | A | G | - | - |
| RGD1559730 | ENSRNOT00000037646 | 18,859,227 | INTRONIC              | A | G | - | - |
| RGD1559730 | ENSRNOT00000037646 | 18,859,255 | INTRONIC              | C | T | - | - |
| RGD1559730 | ENSRNOT00000037646 | 18,859,340 | INTRONIC              | T | A | - | - |
| RGD1559730 | ENSRNOT00000037646 | 18,860,276 | INTRONIC              | G | T | - | - |
| RGD1559730 | ENSRNOT00000037646 | 18,860,295 | INTRONIC              | G | A | - | - |
| RGD1559730 | ENSRNOT00000037646 | 18,860,680 | INTRONIC              | C | T | - | - |
| RGD1559730 | ENSRNOT00000037646 | 18,863,066 | NON_SYNONYMOUS_CODING | C | G | N | K |
| RGD1559730 | ENSRNOT00000037646 | 18,863,115 | NON_SYNONYMOUS_CODING | T | A | F | I |
| RGD1559730 | ENSRNOT00000037646 | 18,863,121 | NON_SYNONYMOUS_CODING | T | C | F | L |
| RGD1559730 | ENSRNOT00000037646 | 18,863,292 | NON_SYNONYMOUS_CODING | T | A | L | M |
| RGD1559730 | ENSRNOT00000037646 | 18,863,319 | NON_SYNONYMOUS_CODING | C | T | P | S |
| RGD1559730 | ENSRNOT00000037646 | 18,863,321 | SYNONYMOUS_CODING     | G | A | - | - |
| RGD1559730 | ENSRNOT00000037646 | 18,863,352 | NON_SYNONYMOUS_CODING | C | G | Q | E |
| RGD1559730 | ENSRNOT00000037646 | 18,863,378 | SYNONYMOUS_CODING     | A | G | - | - |
| RGD1559730 | ENSRNOT00000037646 | 18,863,426 | SYNONYMOUS_CODING     | A | T | - | - |
| RGD1559730 | ENSRNOT00000037646 | 18,863,471 | SYNONYMOUS_CODING     | C | T | - | - |
| RGD1559730 | ENSRNOT00000037646 | 18,863,824 | DOWNSTREAM            | A | T | - | - |
| RGD1559730 | ENSRNOT00000037646 | 18,863,835 | DOWNSTREAM            | C | T | - | - |
| RGD1559730 | ENSRNOT00000037646 | 18,863,873 | DOWNSTREAM            | G | T | - | - |
| RGD1559730 | ENSRNOT00000037646 | 18,863,877 | DOWNSTREAM            | G | T | - | - |
| RGD1559730 | ENSRNOT00000037646 | 18,863,948 | DOWNSTREAM            | A | G | - | - |
| RGD1559730 | ENSRNOT00000037646 | 18,863,977 | DOWNSTREAM            | C | T | - | - |
| RGD1559730 | ENSRNOT00000037646 | 18,864,073 | DOWNSTREAM            | T | G | - | - |
| RGD1559730 | ENSRNOT00000037646 | 18,864,085 | DOWNSTREAM            | G | A | - | - |
| RGD1559730 | ENSRNOT00000037646 | 18,864,179 | DOWNSTREAM            | C | T | - | - |
| RGD1559730 | ENSRNOT00000037646 | 18,865,860 | DOWNSTREAM            | C | T | - | - |
| RGD1559730 | ENSRNOT00000037646 | 18,865,921 | DOWNSTREAM            | G | C | - | - |
| RGD1559730 | ENSRNOT00000037646 | 18,865,929 | DOWNSTREAM            | A | C | - | - |
| RGD1559730 | ENSRNOT00000037646 | 18,866,049 | DOWNSTREAM            | C | T | - | - |
| RGD1559730 | ENSRNOT00000037646 | 18,866,061 | DOWNSTREAM            | A | C | - | - |

|            |                    |            |            |   |   |   |   |
|------------|--------------------|------------|------------|---|---|---|---|
| RGD1559730 | ENSRNOT00000037646 | 18,866,088 | DOWNSTREAM | C | T | - | - |
| RGD1559730 | ENSRNOT00000037646 | 18,866,134 | DOWNSTREAM | T | C | - | - |
| RGD1559730 | ENSRNOT00000037646 | 18,866,138 | DOWNSTREAM | A | C | - | - |
| RGD1559730 | ENSRNOT00000037646 | 18,866,240 | DOWNSTREAM | T | G | - | - |
| RGD1559730 | ENSRNOT00000037646 | 18,867,218 | DOWNSTREAM | T | C | - | - |
| RGD1559730 | ENSRNOT00000037646 | 18,868,183 | DOWNSTREAM | C | G | - | - |
| RGD1559730 | ENSRNOT00000037646 | 18,868,184 | DOWNSTREAM | T | G | - | - |
| -          | -                  | 18,875,363 | INTERGENIC | A | G | - | - |
| -          | -                  | 18,875,385 | INTERGENIC | A | G | - | - |
| -          | -                  | 18,875,542 | INTERGENIC | A | T | - | - |
| -          | -                  | 18,875,689 | INTERGENIC | T | C | - | - |
| -          | -                  | 18,875,778 | INTERGENIC | G | A | - | - |
| -          | -                  | 18,875,783 | INTERGENIC | C | G | - | - |
| -          | -                  | 18,875,818 | INTERGENIC | C | T | - | - |
| -          | -                  | 18,875,826 | INTERGENIC | A | T | - | - |
| -          | -                  | 18,875,885 | INTERGENIC | A | G | - | - |
| -          | -                  | 18,876,039 | INTERGENIC | C | T | - | - |
| -          | -                  | 18,876,236 | INTERGENIC | G | C | - | - |
| -          | -                  | 18,879,466 | INTERGENIC | G | T | - | - |
| -          | -                  | 18,879,508 | INTERGENIC | C | G | - | - |
| -          | -                  | 18,879,664 | INTERGENIC | G | A | - | - |
| -          | -                  | 18,879,685 | INTERGENIC | G | T | - | - |
| -          | -                  | 18,881,410 | INTERGENIC | C | A | - | - |
| -          | -                  | 18,881,440 | INTERGENIC | T | G | - | - |
| -          | -                  | 18,881,708 | INTERGENIC | C | T | - | - |
| -          | -                  | 18,881,714 | INTERGENIC | A | G | - | - |
| -          | -                  | 18,881,931 | INTERGENIC | G | T | - | - |
| -          | -                  | 18,881,986 | INTERGENIC | A | G | - | - |
| -          | -                  | 18,882,108 | INTERGENIC | A | G | - | - |
| -          | -                  | 18,882,138 | INTERGENIC | C | G | - | - |
| -          | -                  | 18,882,173 | INTERGENIC | T | C | - | - |
| -          | -                  | 18,882,547 | INTERGENIC | T | A | - | - |
| -          | -                  | 18,882,739 | INTERGENIC | C | T | - | - |
| -          | -                  | 18,882,755 | INTERGENIC | T | C | - | - |
| -          | -                  | 18,883,327 | INTERGENIC | G | T | - | - |
| -          | -                  | 18,883,980 | INTERGENIC | T | A | - | - |
| -          | -                  | 18,883,993 | INTERGENIC | T | G | - | - |
| -          | -                  | 18,885,470 | INTERGENIC | C | T | - | - |
| -          | -                  | 18,885,514 | INTERGENIC | C | G | - | - |
| -          | -                  | 18,885,818 | INTERGENIC | G | A | - | - |
| -          | -                  | 18,885,843 | INTERGENIC | A | G | - | - |
| -          | -                  | 18,885,867 | INTERGENIC | T | C | - | - |
| -          | -                  | 18,886,143 | INTERGENIC | T | G | - | - |
| -          | -                  | 18,886,186 | INTERGENIC | C | G | - | - |
| -          | -                  | 18,886,219 | INTERGENIC | T | C | - | - |
| -          | -                  | 18,886,241 | INTERGENIC | A | G | - | - |
| -          | -                  | 18,886,258 | INTERGENIC | G | A | - | - |
| -          | -                  | 18,886,265 | INTERGENIC | A | G | - | - |
| -          | -                  | 18,886,294 | INTERGENIC | C | T | - | - |
| -          | -                  | 18,887,084 | INTERGENIC | G | A | - | - |
| -          | -                  | 18,887,097 | INTERGENIC | G | A | - | - |
| -          | -                  | 18,887,206 | INTERGENIC | T | C | - | - |
| -          | -                  | 18,887,389 | INTERGENIC | A | C | - | - |
| -          | -                  | 18,887,405 | INTERGENIC | G | A | - | - |
| -          | -                  | 18,887,489 | INTERGENIC | T | C | - | - |
| -          | -                  | 18,887,555 | INTERGENIC | T | C | - | - |
| -          | -                  | 18,887,562 | INTERGENIC | C | G | - | - |
| -          | -                  | 18,887,606 | INTERGENIC | A | G | - | - |
| -          | -                  | 18,887,633 | INTERGENIC | C | T | - | - |
| -          | -                  | 18,887,658 | INTERGENIC | T | G | - | - |
| -          | -                  | 18,887,807 | INTERGENIC | G | C | - | - |
| -          | -                  | 18,887,822 | INTERGENIC | G | A | - | - |
| -          | -                  | 18,887,873 | INTERGENIC | T | G | - | - |
| -          | -                  | 18,888,359 | INTERGENIC | T | C | - | - |
| -          | -                  | 18,888,531 | INTERGENIC | G | T | - | - |
| -          | -                  | 18,888,573 | INTERGENIC | G | T | - | - |
| -          | -                  | 18,888,592 | INTERGENIC | T | C | - | - |
| -          | -                  | 18,888,835 | INTERGENIC | G | A | - | - |
| -          | -                  | 18,888,951 | INTERGENIC | C | T | - | - |
| -          | -                  | 18,889,114 | INTERGENIC | C | A | - | - |
| -          | -                  | 18,889,248 | INTERGENIC | C | T | - | - |
| -          | -                  | 18,889,252 | INTERGENIC | T | A | - | - |
| -          | -                  | 18,889,301 | INTERGENIC | A | T | - | - |
| -          | -                  | 18,889,475 | INTERGENIC | T | G | - | - |
| -          | -                  | 18,889,508 | INTERGENIC | A | T | - | - |
| -          | -                  | 18,889,555 | INTERGENIC | G | A | - | - |
| -          | -                  | 18,889,600 | INTERGENIC | G | A | - | - |
| -          | -                  | 18,889,825 | INTERGENIC | T | C | - | - |
| -          | -                  | 18,890,047 | INTERGENIC | G | A | - | - |
| -          | -                  | 18,890,107 | INTERGENIC | G | T | - | - |

|   |            |            |   |   |   |   |
|---|------------|------------|---|---|---|---|
| - | 18,890,246 | INTERGENIC | C | T | - | - |
| - | 18,890,366 | INTERGENIC | T | C | - | - |
| - | 18,890,397 | INTERGENIC | A | G | - | - |
| - | 18,890,558 | INTERGENIC | T | C | - | - |
| - | 18,890,559 | INTERGENIC | C | T | - | - |
| - | 18,890,596 | INTERGENIC | G | A | - | - |
| - | 18,890,640 | INTERGENIC | G | A | - | - |
| - | 18,890,743 | INTERGENIC | C | T | - | - |
| - | 18,890,762 | INTERGENIC | G | C | - | - |
| - | 18,890,765 | INTERGENIC | C | T | - | - |
| - | 18,890,766 | INTERGENIC | A | G | - | - |
| - | 18,890,772 | INTERGENIC | A | C | - | - |
| - | 18,890,806 | INTERGENIC | T | A | - | - |
| - | 18,890,908 | INTERGENIC | C | T | - | - |
| - | 18,890,922 | INTERGENIC | G | A | - | - |
| - | 18,890,976 | INTERGENIC | G | A | - | - |
| - | 18,890,989 | INTERGENIC | A | T | - | - |
| - | 18,891,024 | INTERGENIC | G | T | - | - |
| - | 18,891,121 | INTERGENIC | T | C | - | - |
| - | 18,891,142 | INTERGENIC | C | T | - | - |
| - | 18,891,143 | INTERGENIC | T | C | - | - |
| - | 18,891,200 | INTERGENIC | G | A | - | - |
| - | 18,891,674 | INTERGENIC | G | A | - | - |
| - | 18,891,787 | INTERGENIC | G | A | - | - |
| - | 18,891,824 | INTERGENIC | T | C | - | - |
| - | 18,891,840 | INTERGENIC | T | C | - | - |
| - | 18,891,913 | INTERGENIC | C | T | - | - |
| - | 18,892,102 | INTERGENIC | G | T | - | - |
| - | 18,892,125 | INTERGENIC | T | A | - | - |
| - | 18,892,130 | INTERGENIC | G | A | - | - |
| - | 18,892,145 | INTERGENIC | G | T | - | - |
| - | 18,892,183 | INTERGENIC | G | T | - | - |
| - | 18,892,192 | INTERGENIC | T | C | - | - |
| - | 18,892,422 | INTERGENIC | A | C | - | - |
| - | 18,892,434 | INTERGENIC | C | T | - | - |
| - | 18,892,455 | INTERGENIC | G | A | - | - |
| - | 18,892,468 | INTERGENIC | C | A | - | - |
| - | 18,892,471 | INTERGENIC | G | T | - | - |
| - | 18,892,501 | INTERGENIC | C | A | - | - |
| - | 18,892,517 | INTERGENIC | C | T | - | - |
| - | 18,892,534 | INTERGENIC | A | G | - | - |
| - | 18,892,611 | INTERGENIC | T | G | - | - |
| - | 18,892,612 | INTERGENIC | T | G | - | - |
| - | 18,892,827 | INTERGENIC | T | C | - | - |
| - | 18,892,998 | INTERGENIC | A | G | - | - |
| - | 18,893,097 | INTERGENIC | G | A | - | - |
| - | 18,893,110 | INTERGENIC | A | C | - | - |
| - | 18,893,282 | INTERGENIC | G | A | - | - |
| - | 18,893,439 | INTERGENIC | A | G | - | - |
| - | 18,893,719 | INTERGENIC | C | T | - | - |
| - | 18,894,052 | INTERGENIC | A | G | - | - |
| - | 18,894,166 | INTERGENIC | G | A | - | - |
| - | 18,894,360 | INTERGENIC | A | C | - | - |
| - | 18,894,395 | INTERGENIC | T | G | - | - |
| - | 18,894,431 | INTERGENIC | A | T | - | - |
| - | 18,894,569 | INTERGENIC | T | A | - | - |
| - | 18,894,739 | INTERGENIC | C | T | - | - |
| - | 18,894,760 | INTERGENIC | T | C | - | - |
| - | 18,894,788 | INTERGENIC | T | A | - | - |
| - | 18,894,982 | INTERGENIC | C | T | - | - |
| - | 18,894,985 | INTERGENIC | G | C | - | - |
| - | 18,894,990 | INTERGENIC | G | T | - | - |
| - | 18,895,106 | INTERGENIC | G | C | - | - |
| - | 18,895,109 | INTERGENIC | T | C | - | - |
| - | 18,895,218 | INTERGENIC | A | T | - | - |
| - | 18,895,328 | INTERGENIC | T | C | - | - |
| - | 18,895,389 | INTERGENIC | T | C | - | - |
| - | 18,895,417 | INTERGENIC | A | T | - | - |
| - | 18,895,427 | INTERGENIC | T | G | - | - |
| - | 18,895,791 | INTERGENIC | C | G | - | - |
| - | 18,896,400 | INTERGENIC | C | T | - | - |
| - | 18,896,406 | INTERGENIC | G | T | - | - |
| - | 18,896,417 | INTERGENIC | A | G | - | - |
| - | 18,896,435 | INTERGENIC | C | T | - | - |
| - | 18,896,452 | INTERGENIC | G | C | - | - |
| - | 18,896,590 | INTERGENIC | A | G | - | - |
| - | 18,896,619 | INTERGENIC | T | C | - | - |
| - | 18,896,651 | INTERGENIC | T | C | - | - |
| - | 18,896,688 | INTERGENIC | T | G | - | - |
| - | 18,896,690 | INTERGENIC | C | T | - | - |

|   |            |            |   |   |   |   |
|---|------------|------------|---|---|---|---|
| - | 18,896,716 | INTERGENIC | T | C | - | - |
| - | 18,896,719 | INTERGENIC | A | C | - | - |
| - | 18,896,908 | INTERGENIC | A | G | - | - |
| - | 18,896,929 | INTERGENIC | C | A | - | - |
| - | 18,896,935 | INTERGENIC | T | C | - | - |
| - | 18,897,557 | INTERGENIC | G | A | - | - |
| - | 18,897,627 | INTERGENIC | C | T | - | - |
| - | 18,897,662 | INTERGENIC | T | G | - | - |
| - | 18,897,878 | INTERGENIC | A | G | - | - |
| - | 18,897,889 | INTERGENIC | G | T | - | - |
| - | 18,897,935 | INTERGENIC | G | A | - | - |
| - | 18,898,000 | INTERGENIC | T | G | - | - |
| - | 18,898,045 | INTERGENIC | T | A | - | - |
| - | 18,898,047 | INTERGENIC | T | A | - | - |
| - | 18,898,113 | INTERGENIC | T | C | - | - |
| - | 18,898,115 | INTERGENIC | C | A | - | - |
| - | 18,898,150 | INTERGENIC | G | A | - | - |
| - | 18,898,174 | INTERGENIC | C | A | - | - |
| - | 18,898,178 | INTERGENIC | A | G | - | - |
| - | 18,898,204 | INTERGENIC | A | G | - | - |
| - | 18,898,220 | INTERGENIC | C | T | - | - |
| - | 18,898,254 | INTERGENIC | C | A | - | - |
| - | 18,898,267 | INTERGENIC | G | C | - | - |
| - | 18,898,279 | INTERGENIC | T | G | - | - |
| - | 18,898,356 | INTERGENIC | A | T | - | - |
| - | 18,898,418 | INTERGENIC | T | G | - | - |
| - | 18,898,718 | INTERGENIC | A | G | - | - |
| - | 18,898,833 | INTERGENIC | A | G | - | - |
| - | 18,898,918 | INTERGENIC | G | A | - | - |
| - | 18,898,938 | INTERGENIC | A | T | - | - |
| - | 18,898,971 | INTERGENIC | A | G | - | - |
| - | 18,899,097 | INTERGENIC | T | C | - | - |
| - | 18,899,174 | INTERGENIC | A | G | - | - |
| - | 18,899,210 | INTERGENIC | G | A | - | - |
| - | 18,899,246 | INTERGENIC | A | G | - | - |
| - | 18,899,258 | INTERGENIC | C | G | - | - |
| - | 18,899,605 | INTERGENIC | G | A | - | - |
| - | 18,899,628 | INTERGENIC | T | G | - | - |
| - | 18,899,651 | INTERGENIC | C | A | - | - |
| - | 18,899,678 | INTERGENIC | C | T | - | - |
| - | 18,899,726 | INTERGENIC | T | G | - | - |
| - | 18,899,769 | INTERGENIC | G | A | - | - |
| - | 18,899,799 | INTERGENIC | T | G | - | - |
| - | 18,900,257 | INTERGENIC | G | A | - | - |
| - | 18,900,340 | INTERGENIC | A | G | - | - |
| - | 18,900,363 | INTERGENIC | A | C | - | - |
| - | 18,900,368 | INTERGENIC | T | C | - | - |
| - | 18,900,416 | INTERGENIC | C | G | - | - |
| - | 18,900,453 | INTERGENIC | A | G | - | - |
| - | 18,900,471 | INTERGENIC | T | G | - | - |
| - | 18,900,506 | INTERGENIC | A | G | - | - |
| - | 18,900,556 | INTERGENIC | A | G | - | - |
| - | 18,900,710 | INTERGENIC | T | A | - | - |
| - | 18,900,733 | INTERGENIC | G | A | - | - |
| - | 18,900,840 | INTERGENIC | T | C | - | - |
| - | 18,900,902 | INTERGENIC | T | A | - | - |
| - | 18,900,907 | INTERGENIC | T | A | - | - |
| - | 18,900,931 | INTERGENIC | A | C | - | - |
| - | 18,900,936 | INTERGENIC | T | G | - | - |
| - | 18,901,070 | INTERGENIC | A | G | - | - |
| - | 18,901,178 | INTERGENIC | G | T | - | - |
| - | 18,901,266 | INTERGENIC | T | C | - | - |
| - | 18,901,330 | INTERGENIC | A | C | - | - |
| - | 18,901,346 | INTERGENIC | A | C | - | - |
| - | 18,901,363 | INTERGENIC | G | A | - | - |
| - | 18,901,432 | INTERGENIC | G | A | - | - |
| - | 18,901,503 | INTERGENIC | A | G | - | - |
| - | 18,901,524 | INTERGENIC | C | T | - | - |
| - | 18,901,702 | INTERGENIC | T | G | - | - |
| - | 18,901,716 | INTERGENIC | T | C | - | - |
| - | 18,901,723 | INTERGENIC | A | G | - | - |
| - | 18,901,779 | INTERGENIC | A | T | - | - |
| - | 18,901,831 | INTERGENIC | T | A | - | - |
| - | 18,901,896 | INTERGENIC | G | C | - | - |
| - | 18,901,910 | INTERGENIC | T | G | - | - |
| - | 18,901,968 | INTERGENIC | T | G | - | - |
| - | 18,901,975 | INTERGENIC | T | A | - | - |
| - | 18,902,009 | INTERGENIC | G | C | - | - |
| - | 18,902,033 | INTERGENIC | T | G | - | - |
| - | 18,902,036 | INTERGENIC | C | T | - | - |

|   |            |            |   |   |   |   |
|---|------------|------------|---|---|---|---|
| - | 18,902,060 | INTERGENIC | G | T | - | - |
| - | 18,902,098 | INTERGENIC | T | G | - | - |
| - | 18,902,110 | INTERGENIC | G | A | - | - |
| - | 18,902,160 | INTERGENIC | T | G | - | - |
| - | 18,902,245 | INTERGENIC | C | T | - | - |
| - | 18,902,266 | INTERGENIC | G | A | - | - |
| - | 18,902,291 | INTERGENIC | T | C | - | - |
| - | 18,902,909 | INTERGENIC | G | A | - | - |
| - | 18,902,928 | INTERGENIC | C | T | - | - |
| - | 18,902,953 | INTERGENIC | T | A | - | - |
| - | 18,902,983 | INTERGENIC | G | T | - | - |
| - | 18,902,992 | INTERGENIC | A | G | - | - |
| - | 18,903,026 | INTERGENIC | C | A | - | - |
| - | 18,904,365 | INTERGENIC | T | C | - | - |
| - | 18,904,435 | INTERGENIC | C | T | - | - |
| - | 18,904,549 | INTERGENIC | C | T | - | - |
| - | 18,904,554 | INTERGENIC | A | G | - | - |
| - | 18,904,706 | INTERGENIC | C | T | - | - |
| - | 18,904,719 | INTERGENIC | T | C | - | - |
| - | 18,904,826 | INTERGENIC | A | T | - | - |
| - | 18,904,895 | INTERGENIC | G | T | - | - |
| - | 18,904,919 | INTERGENIC | G | A | - | - |
| - | 18,905,093 | INTERGENIC | G | A | - | - |
| - | 18,905,102 | INTERGENIC | A | G | - | - |
| - | 18,905,120 | INTERGENIC | C | T | - | - |
| - | 18,905,477 | INTERGENIC | A | G | - | - |
| - | 18,905,500 | INTERGENIC | C | T | - | - |
| - | 18,905,504 | INTERGENIC | C | A | - | - |
| - | 18,905,505 | INTERGENIC | A | C | - | - |
| - | 18,905,521 | INTERGENIC | G | A | - | - |
| - | 18,905,534 | INTERGENIC | G | A | - | - |
| - | 18,905,664 | INTERGENIC | G | C | - | - |
| - | 18,905,761 | INTERGENIC | C | T | - | - |
| - | 18,905,923 | INTERGENIC | G | A | - | - |
| - | 18,905,975 | INTERGENIC | G | C | - | - |
| - | 18,906,016 | INTERGENIC | C | A | - | - |
| - | 18,906,285 | INTERGENIC | T | C | - | - |
| - | 18,906,374 | INTERGENIC | A | T | - | - |
| - | 18,906,692 | INTERGENIC | G | A | - | - |
| - | 18,906,707 | INTERGENIC | G | A | - | - |
| - | 18,906,861 | INTERGENIC | G | T | - | - |
| - | 18,907,335 | INTERGENIC | T | A | - | - |
| - | 18,907,353 | INTERGENIC | A | C | - | - |
| - | 18,907,381 | INTERGENIC | T | A | - | - |
| - | 18,907,392 | INTERGENIC | T | G | - | - |
| - | 18,907,770 | INTERGENIC | C | A | - | - |
| - | 18,907,851 | INTERGENIC | C | T | - | - |
| - | 18,907,932 | INTERGENIC | C | G | - | - |
| - | 18,908,012 | INTERGENIC | G | T | - | - |
| - | 18,908,055 | INTERGENIC | A | G | - | - |
| - | 18,908,148 | INTERGENIC | C | G | - | - |
| - | 18,908,150 | INTERGENIC | G | A | - | - |
| - | 18,908,194 | INTERGENIC | A | G | - | - |
| - | 18,908,211 | INTERGENIC | C | T | - | - |
| - | 18,908,224 | INTERGENIC | A | T | - | - |
| - | 18,908,225 | INTERGENIC | A | T | - | - |
| - | 18,908,823 | INTERGENIC | C | T | - | - |
| - | 18,909,936 | INTERGENIC | C | T | - | - |
| - | 18,909,941 | INTERGENIC | A | G | - | - |
| - | 18,909,952 | INTERGENIC | G | T | - | - |
| - | 18,910,029 | INTERGENIC | G | C | - | - |
| - | 18,910,094 | INTERGENIC | C | A | - | - |
| - | 18,910,109 | INTERGENIC | T | C | - | - |
| - | 18,910,595 | INTERGENIC | A | G | - | - |
| - | 18,910,645 | INTERGENIC | C | A | - | - |
| - | 18,910,650 | INTERGENIC | T | A | - | - |
| - | 18,910,683 | INTERGENIC | C | T | - | - |
| - | 18,910,701 | INTERGENIC | G | A | - | - |
| - | 18,910,707 | INTERGENIC | T | C | - | - |
| - | 18,910,760 | INTERGENIC | T | G | - | - |
| - | 18,910,820 | INTERGENIC | C | T | - | - |
| - | 18,910,821 | INTERGENIC | G | A | - | - |
| - | 18,910,874 | INTERGENIC | C | T | - | - |
| - | 18,910,977 | INTERGENIC | C | A | - | - |
| - | 18,911,080 | INTERGENIC | C | A | - | - |
| - | 18,911,086 | INTERGENIC | G | A | - | - |
| - | 18,911,126 | INTERGENIC | T | G | - | - |
| - | 18,911,211 | INTERGENIC | C | T | - | - |
| - | 18,911,294 | INTERGENIC | T | C | - | - |
| - | 18,911,367 | INTERGENIC | T | C | - | - |

|            |                    |            |            |   |   |   |   |
|------------|--------------------|------------|------------|---|---|---|---|
| -          | -                  | 18,911,399 | INTERGENIC | A | G | - | - |
| -          | -                  | 18,911,468 | INTERGENIC | T | C | - | - |
| -          | -                  | 18,911,488 | INTERGENIC | C | A | - | - |
| -          | -                  | 18,911,505 | INTERGENIC | G | A | - | - |
| -          | -                  | 18,911,528 | INTERGENIC | T | G | - | - |
| -          | -                  | 18,911,574 | INTERGENIC | C | A | - | - |
| -          | -                  | 18,911,579 | INTERGENIC | T | C | - | - |
| -          | -                  | 18,911,587 | INTERGENIC | T | C | - | - |
| -          | -                  | 18,911,944 | INTERGENIC | G | A | - | - |
| -          | -                  | 18,911,953 | INTERGENIC | C | A | - | - |
| -          | -                  | 18,912,086 | INTERGENIC | A | G | - | - |
| -          | -                  | 18,912,092 | INTERGENIC | G | A | - | - |
| -          | -                  | 18,912,137 | INTERGENIC | T | C | - | - |
| -          | -                  | 18,912,221 | INTERGENIC | T | C | - | - |
| -          | -                  | 18,912,729 | INTERGENIC | G | T | - | - |
| -          | -                  | 18,912,754 | INTERGENIC | T | C | - | - |
| -          | -                  | 18,912,802 | INTERGENIC | G | A | - | - |
| -          | -                  | 18,912,882 | INTERGENIC | T | G | - | - |
| -          | -                  | 18,912,883 | INTERGENIC | C | T | - | - |
| -          | -                  | 18,915,930 | INTERGENIC | C | G | - | - |
| -          | -                  | 18,916,198 | INTERGENIC | T | A | - | - |
| -          | -                  | 18,916,214 | INTERGENIC | G | A | - | - |
| -          | -                  | 18,916,334 | INTERGENIC | A | C | - | - |
| RGD1564052 | ENSRNOT00000065351 | 18,925,262 | DOWNSTREAM | T | A | - | - |
| LOC681196  | ENSRNOT00000042758 | 19,049,772 | UPSTREAM   | T | C | - | - |
| LOC681196  | ENSRNOT00000042758 | 19,050,961 | UPSTREAM   | G | A | - | - |
| LOC681196  | ENSRNOT00000042758 | 19,050,987 | UPSTREAM   | C | T | - | - |
| LOC681196  | ENSRNOT00000042758 | 19,051,047 | UPSTREAM   | T | C | - | - |
| LOC681196  | ENSRNOT00000042758 | 19,051,092 | UPSTREAM   | G | A | - | - |
| LOC681196  | ENSRNOT00000042758 | 19,051,102 | UPSTREAM   | T | C | - | - |
| -          | -                  | 19,185,811 | INTERGENIC | C | A | - | - |
| -          | -                  | 19,185,982 | INTERGENIC | G | A | - | - |
| -          | -                  | 19,186,196 | INTERGENIC | G | T | - | - |
| -          | -                  | 19,188,183 | INTERGENIC | G | A | - | - |
| -          | -                  | 19,188,483 | INTERGENIC | A | G | - | - |
| -          | -                  | 19,188,484 | INTERGENIC | T | A | - | - |
| -          | -                  | 19,188,558 | INTERGENIC | A | C | - | - |
| -          | -                  | 19,188,992 | INTERGENIC | G | A | - | - |
| -          | -                  | 19,189,053 | INTERGENIC | C | T | - | - |
| -          | -                  | 19,189,076 | INTERGENIC | T | G | - | - |
| -          | -                  | 19,189,110 | INTERGENIC | C | G | - | - |
| -          | -                  | 19,189,363 | INTERGENIC | T | G | - | - |
| -          | -                  | 19,189,427 | INTERGENIC | G | T | - | - |
| -          | -                  | 19,189,504 | INTERGENIC | G | A | - | - |
| -          | -                  | 19,189,793 | INTERGENIC | A | G | - | - |
| -          | -                  | 19,190,143 | INTERGENIC | G | T | - | - |
| -          | -                  | 19,190,343 | INTERGENIC | C | A | - | - |
| -          | -                  | 19,190,371 | INTERGENIC | A | G | - | - |
| -          | -                  | 19,190,515 | INTERGENIC | T | A | - | - |
| -          | -                  | 19,190,735 | INTERGENIC | T | C | - | - |
| -          | -                  | 19,190,865 | INTERGENIC | G | C | - | - |
| -          | -                  | 19,191,160 | INTERGENIC | T | C | - | - |
| -          | -                  | 19,191,204 | INTERGENIC | T | G | - | - |
| -          | -                  | 19,191,486 | INTERGENIC | T | G | - | - |
| -          | -                  | 19,191,706 | INTERGENIC | G | A | - | - |
| -          | -                  | 19,191,961 | INTERGENIC | G | A | - | - |
| -          | -                  | 19,191,962 | INTERGENIC | A | G | - | - |
| -          | -                  | 19,192,290 | INTERGENIC | T | C | - | - |
| -          | -                  | 19,192,309 | INTERGENIC | C | T | - | - |
| -          | -                  | 19,192,472 | INTERGENIC | T | A | - | - |
| -          | -                  | 19,192,484 | INTERGENIC | C | T | - | - |
| -          | -                  | 19,192,508 | INTERGENIC | A | C | - | - |
| -          | -                  | 19,192,549 | INTERGENIC | T | C | - | - |
| -          | -                  | 19,192,550 | INTERGENIC | G | A | - | - |
| -          | -                  | 19,192,581 | INTERGENIC | T | C | - | - |
| -          | -                  | 19,192,991 | INTERGENIC | A | G | - | - |
| -          | -                  | 19,193,127 | INTERGENIC | A | C | - | - |
| -          | -                  | 19,193,269 | INTERGENIC | C | T | - | - |
| -          | -                  | 19,193,507 | INTERGENIC | A | G | - | - |
| -          | -                  | 19,193,570 | INTERGENIC | A | T | - | - |
| -          | -                  | 19,193,767 | INTERGENIC | C | T | - | - |
| -          | -                  | 19,193,810 | INTERGENIC | A | G | - | - |
| -          | -                  | 19,193,815 | INTERGENIC | T | C | - | - |
| -          | -                  | 19,194,209 | INTERGENIC | G | A | - | - |
| -          | -                  | 19,194,214 | INTERGENIC | G | A | - | - |
| -          | -                  | 19,194,367 | INTERGENIC | A | G | - | - |
| -          | -                  | 19,194,697 | INTERGENIC | T | A | - | - |
| -          | -                  | 19,194,698 | INTERGENIC | C | A | - | - |
| -          | -                  | 19,194,834 | INTERGENIC | G | C | - | - |
| -          | -                  | 19,194,919 | INTERGENIC | C | G | - | - |

|   |            |            |   |   |   |   |
|---|------------|------------|---|---|---|---|
| - | 19,195,008 | INTERGENIC | A | G | - | - |
| - | 19,195,328 | INTERGENIC | T | C | - | - |
| - | 19,195,400 | INTERGENIC | G | T | - | - |
| - | 19,195,500 | INTERGENIC | A | T | - | - |
| - | 19,195,564 | INTERGENIC | C | G | - | - |
| - | 19,195,894 | INTERGENIC | A | G | - | - |
| - | 19,196,241 | INTERGENIC | G | A | - | - |
| - | 19,196,548 | INTERGENIC | A | T | - | - |
| - | 19,196,553 | INTERGENIC | G | T | - | - |
| - | 19,196,571 | INTERGENIC | G | T | - | - |
| - | 19,196,999 | INTERGENIC | A | T | - | - |
| - | 19,197,197 | INTERGENIC | G | A | - | - |
| - | 19,197,392 | INTERGENIC | T | A | - | - |
| - | 19,197,594 | INTERGENIC | T | A | - | - |
| - | 19,197,943 | INTERGENIC | G | A | - | - |
| - | 19,198,015 | INTERGENIC | A | T | - | - |
| - | 19,198,811 | INTERGENIC | G | C | - | - |
| - | 19,198,827 | INTERGENIC | T | C | - | - |
| - | 19,198,960 | INTERGENIC | A | G | - | - |
| - | 19,199,264 | INTERGENIC | G | C | - | - |
| - | 19,199,640 | INTERGENIC | T | C | - | - |
| - | 19,200,787 | INTERGENIC | A | G | - | - |
| - | 19,203,679 | INTERGENIC | A | G | - | - |
| - | 19,203,684 | INTERGENIC | G | A | - | - |
| - | 19,203,741 | INTERGENIC | C | T | - | - |
| - | 19,203,766 | INTERGENIC | A | G | - | - |
| - | 19,203,865 | INTERGENIC | A | G | - | - |
| - | 19,203,891 | INTERGENIC | G | T | - | - |
| - | 19,204,019 | INTERGENIC | A | G | - | - |
| - | 19,204,104 | INTERGENIC | A | G | - | - |
| - | 19,204,113 | INTERGENIC | A | T | - | - |
| - | 19,204,213 | INTERGENIC | G | A | - | - |
| - | 19,204,331 | INTERGENIC | A | C | - | - |
| - | 19,204,359 | INTERGENIC | A | G | - | - |
| - | 19,204,368 | INTERGENIC | C | T | - | - |
| - | 19,204,478 | INTERGENIC | G | A | - | - |
| - | 19,204,506 | INTERGENIC | C | G | - | - |
| - | 19,204,551 | INTERGENIC | T | A | - | - |
| - | 19,204,590 | INTERGENIC | A | C | - | - |
| - | 19,204,755 | INTERGENIC | A | T | - | - |
| - | 19,205,017 | INTERGENIC | G | A | - | - |
| - | 19,205,052 | INTERGENIC | C | T | - | - |
| - | 19,205,061 | INTERGENIC | T | C | - | - |
| - | 19,205,128 | INTERGENIC | G | A | - | - |
| - | 19,205,134 | INTERGENIC | A | G | - | - |
| - | 19,205,136 | INTERGENIC | A | G | - | - |
| - | 19,205,207 | INTERGENIC | T | A | - | - |
| - | 19,205,357 | INTERGENIC | A | T | - | - |
| - | 19,205,425 | INTERGENIC | T | G | - | - |
| - | 19,205,713 | INTERGENIC | C | G | - | - |
| - | 19,205,900 | INTERGENIC | T | G | - | - |
| - | 19,207,915 | INTERGENIC | A | C | - | - |
| - | 19,208,063 | INTERGENIC | T | C | - | - |
| - | 19,208,066 | INTERGENIC | G | T | - | - |
| - | 19,208,431 | INTERGENIC | T | C | - | - |
| - | 19,209,134 | INTERGENIC | G | A | - | - |
| - | 19,209,156 | INTERGENIC | G | A | - | - |
| - | 19,209,178 | INTERGENIC | G | A | - | - |
| - | 19,209,201 | INTERGENIC | C | T | - | - |
| - | 19,209,288 | INTERGENIC | A | G | - | - |
| - | 19,209,434 | INTERGENIC | A | T | - | - |
| - | 19,209,435 | INTERGENIC | T | C | - | - |
| - | 19,209,917 | INTERGENIC | C | T | - | - |
| - | 19,209,973 | INTERGENIC | T | C | - | - |
| - | 19,210,577 | INTERGENIC | G | C | - | - |
| - | 19,210,693 | INTERGENIC | T | C | - | - |
| - | 19,210,847 | INTERGENIC | A | T | - | - |
| - | 19,211,173 | INTERGENIC | G | T | - | - |
| - | 19,211,888 | INTERGENIC | T | C | - | - |
| - | 19,211,936 | INTERGENIC | T | A | - | - |
| - | 19,212,072 | INTERGENIC | A | G | - | - |
| - | 19,212,150 | INTERGENIC | A | G | - | - |
| - | 19,212,485 | INTERGENIC | G | A | - | - |
| - | 19,212,600 | INTERGENIC | C | G | - | - |
| - | 19,214,062 | INTERGENIC | T | C | - | - |
| - | 19,214,577 | INTERGENIC | A | G | - | - |
| - | 19,214,658 | INTERGENIC | C | T | - | - |
| - | 19,214,964 | INTERGENIC | A | G | - | - |
| - | 19,214,972 | INTERGENIC | T | C | - | - |
| - | 19,215,270 | INTERGENIC | T | G | - | - |

|   |            |            |   |   |   |   |
|---|------------|------------|---|---|---|---|
| - | 19,215,277 | INTERGENIC | G | A | - | - |
| - | 19,215,443 | INTERGENIC | G | A | - | - |
| - | 19,215,496 | INTERGENIC | C | T | - | - |
| - | 19,215,695 | INTERGENIC | C | T | - | - |
| - | 19,215,725 | INTERGENIC | C | A | - | - |
| - | 19,215,780 | INTERGENIC | T | C | - | - |
| - | 19,215,835 | INTERGENIC | A | G | - | - |
| - | 19,216,018 | INTERGENIC | A | G | - | - |
| - | 19,216,065 | INTERGENIC | T | G | - | - |
| - | 19,216,084 | INTERGENIC | C | T | - | - |
| - | 19,216,340 | INTERGENIC | T | A | - | - |
| - | 19,216,677 | INTERGENIC | G | A | - | - |
| - | 19,216,738 | INTERGENIC | A | G | - | - |
| - | 19,216,821 | INTERGENIC | A | T | - | - |
| - | 19,216,895 | INTERGENIC | A | G | - | - |
| - | 19,217,960 | INTERGENIC | A | G | - | - |
| - | 19,218,073 | INTERGENIC | A | T | - | - |
| - | 19,218,178 | INTERGENIC | G | A | - | - |
| - | 19,218,266 | INTERGENIC | C | G | - | - |
| - | 19,218,377 | INTERGENIC | A | T | - | - |
| - | 19,218,378 | INTERGENIC | G | T | - | - |
| - | 19,218,531 | INTERGENIC | C | T | - | - |
| - | 19,218,563 | INTERGENIC | C | T | - | - |
| - | 19,218,579 | INTERGENIC | T | A | - | - |
| - | 19,218,625 | INTERGENIC | G | A | - | - |
| - | 19,218,662 | INTERGENIC | T | C | - | - |
| - | 19,218,818 | INTERGENIC | C | T | - | - |
| - | 19,219,306 | INTERGENIC | T | C | - | - |
| - | 19,230,872 | INTERGENIC | A | G | - | - |
| - | 19,231,080 | INTERGENIC | G | T | - | - |
| - | 19,231,128 | INTERGENIC | C | A | - | - |
| - | 19,231,214 | INTERGENIC | G | A | - | - |
| - | 19,232,065 | INTERGENIC | C | T | - | - |
| - | 19,232,106 | INTERGENIC | G | A | - | - |
| - | 19,232,174 | INTERGENIC | T | C | - | - |
| - | 19,232,203 | INTERGENIC | A | G | - | - |
| - | 19,232,363 | INTERGENIC | T | G | - | - |
| - | 19,232,446 | INTERGENIC | G | A | - | - |
| - | 19,232,452 | INTERGENIC | T | C | - | - |
| - | 19,232,558 | INTERGENIC | G | T | - | - |
| - | 19,232,612 | INTERGENIC | T | C | - | - |
| - | 19,232,629 | INTERGENIC | C | T | - | - |
| - | 19,232,787 | INTERGENIC | G | C | - | - |
| - | 19,232,847 | INTERGENIC | C | A | - | - |
| - | 19,232,891 | INTERGENIC | G | A | - | - |
| - | 19,232,924 | INTERGENIC | G | A | - | - |
| - | 19,233,005 | INTERGENIC | G | T | - | - |
| - | 19,233,109 | INTERGENIC | C | T | - | - |
| - | 19,233,141 | INTERGENIC | A | C | - | - |
| - | 19,233,225 | INTERGENIC | G | A | - | - |
| - | 19,233,352 | INTERGENIC | T | A | - | - |
| - | 19,233,463 | INTERGENIC | C | A | - | - |
| - | 19,233,621 | INTERGENIC | T | G | - | - |
| - | 19,233,846 | INTERGENIC | T | A | - | - |
| - | 19,234,066 | INTERGENIC | C | A | - | - |
| - | 19,234,142 | INTERGENIC | A | G | - | - |
| - | 19,234,196 | INTERGENIC | T | C | - | - |
| - | 19,234,318 | INTERGENIC | A | G | - | - |
| - | 19,234,425 | INTERGENIC | A | C | - | - |
| - | 19,234,471 | INTERGENIC | A | C | - | - |
| - | 19,234,535 | INTERGENIC | G | A | - | - |
| - | 19,234,639 | INTERGENIC | G | C | - | - |
| - | 19,234,667 | INTERGENIC | A | T | - | - |
| - | 19,234,704 | INTERGENIC | G | A | - | - |
| - | 19,234,709 | INTERGENIC | G | A | - | - |
| - | 19,234,788 | INTERGENIC | A | C | - | - |
| - | 19,234,850 | INTERGENIC | G | A | - | - |
| - | 19,234,895 | INTERGENIC | A | C | - | - |
| - | 19,234,989 | INTERGENIC | A | G | - | - |
| - | 19,235,003 | INTERGENIC | G | C | - | - |
| - | 19,235,168 | INTERGENIC | G | A | - | - |
| - | 19,235,192 | INTERGENIC | G | C | - | - |
| - | 19,235,214 | INTERGENIC | A | G | - | - |
| - | 19,235,223 | INTERGENIC | C | T | - | - |
| - | 19,235,252 | INTERGENIC | A | T | - | - |
| - | 19,235,486 | INTERGENIC | T | G | - | - |
| - | 19,235,614 | INTERGENIC | C | T | - | - |
| - | 19,235,748 | INTERGENIC | G | T | - | - |
| - | 19,235,928 | INTERGENIC | G | T | - | - |
| - | 19,236,053 | INTERGENIC | T | A | - | - |



|   |            |            |   |   |   |   |
|---|------------|------------|---|---|---|---|
| - | 19,236,301 | INTERGENIC | G | T | - | - |
| - | 19,236,406 | INTERGENIC | C | T | - | - |
| - | 19,237,171 | INTERGENIC | G | A | - | - |
| - | 19,237,237 | INTERGENIC | T | C | - | - |
| - | 19,237,703 | INTERGENIC | C | T | - | - |
| - | 19,238,068 | INTERGENIC | A | C | - | - |
| - | 19,238,233 | INTERGENIC | A | C | - | - |
| - | 19,238,242 | INTERGENIC | C | T | - | - |
| - | 19,238,296 | INTERGENIC | G | T | - | - |
| - | 19,238,350 | INTERGENIC | A | G | - | - |
| - | 19,238,396 | INTERGENIC | G | A | - | - |
| - | 19,238,414 | INTERGENIC | A | C | - | - |
| - | 19,238,466 | INTERGENIC | A | G | - | - |
| - | 19,238,471 | INTERGENIC | C | T | - | - |
| - | 19,238,554 | INTERGENIC | T | A | - | - |
| - | 19,238,670 | INTERGENIC | T | C | - | - |
| - | 19,238,671 | INTERGENIC | G | A | - | - |
| - | 19,238,814 | INTERGENIC | G | T | - | - |
| - | 19,238,855 | INTERGENIC | T | G | - | - |
| - | 19,238,970 | INTERGENIC | T | G | - | - |
| - | 19,239,122 | INTERGENIC | C | A | - | - |
| - | 19,239,165 | INTERGENIC | A | C | - | - |
| - | 19,239,646 | INTERGENIC | A | G | - | - |
| - | 19,239,677 | INTERGENIC | T | A | - | - |
| - | 19,239,687 | INTERGENIC | C | T | - | - |
| - | 19,239,756 | INTERGENIC | C | T | - | - |
| - | 19,241,678 | INTERGENIC | A | G | - | - |
| - | 19,241,708 | INTERGENIC | T | A | - | - |
| - | 19,241,730 | INTERGENIC | C | T | - | - |
| - | 19,242,023 | INTERGENIC | G | A | - | - |
| - | 19,243,118 | INTERGENIC | G | T | - | - |
| - | 19,243,691 | INTERGENIC | A | T | - | - |
| - | 19,243,731 | INTERGENIC | T | C | - | - |
| - | 19,243,734 | INTERGENIC | G | A | - | - |
| - | 19,243,739 | INTERGENIC | C | T | - | - |
| - | 19,244,278 | INTERGENIC | G | C | - | - |
| - | 19,244,285 | INTERGENIC | A | G | - | - |
| - | 19,244,870 | INTERGENIC | C | A | - | - |
| - | 19,244,888 | INTERGENIC | G | A | - | - |
| - | 19,244,924 | INTERGENIC | G | T | - | - |
| - | 19,244,929 | INTERGENIC | C | T | - | - |
| - | 19,244,963 | INTERGENIC | G | C | - | - |
| - | 19,244,965 | INTERGENIC | G | C | - | - |
| - | 19,244,986 | INTERGENIC | T | C | - | - |
| - | 19,244,988 | INTERGENIC | C | T | - | - |
| - | 19,255,051 | INTERGENIC | G | A | - | - |
| - | 19,255,084 | INTERGENIC | A | T | - | - |
| - | 19,255,086 | INTERGENIC | C | G | - | - |
| - | 19,257,179 | INTERGENIC | A | T | - | - |
| - | 19,257,339 | INTERGENIC | G | A | - | - |
| - | 19,257,393 | INTERGENIC | A | C | - | - |
| - | 19,258,190 | INTERGENIC | G | A | - | - |
| - | 19,258,232 | INTERGENIC | C | T | - | - |
| - | 19,259,463 | INTERGENIC | C | G | - | - |
| - | 19,262,241 | INTERGENIC | A | T | - | - |
| - | 19,262,367 | INTERGENIC | C | A | - | - |
| - | 19,262,389 | INTERGENIC | G | C | - | - |
| - | 19,262,456 | INTERGENIC | T | G | - | - |
| - | 19,265,374 | INTERGENIC | A | G | - | - |
| - | 19,265,543 | INTERGENIC | T | C | - | - |
| - | 19,265,661 | INTERGENIC | G | C | - | - |
| - | 19,265,755 | INTERGENIC | T | C | - | - |
| - | 19,266,263 | INTERGENIC | C | G | - | - |
| - | 19,266,342 | INTERGENIC | C | T | - | - |
| - | 19,266,871 | INTERGENIC | G | A | - | - |
| - | 19,267,483 | INTERGENIC | C | T | - | - |
| - | 19,267,487 | INTERGENIC | G | A | - | - |
| - | 19,267,538 | INTERGENIC | C | T | - | - |
| - | 19,267,640 | INTERGENIC | A | C | - | - |
| - | 19,267,668 | INTERGENIC | G | C | - | - |
| - | 19,267,775 | INTERGENIC | C | G | - | - |
| - | 19,267,817 | INTERGENIC | C | A | - | - |
| - | 19,268,233 | INTERGENIC | T | G | - | - |
| - | 19,268,260 | INTERGENIC | G | C | - | - |
| - | 19,268,311 | INTERGENIC | G | A | - | - |
| - | 19,268,367 | INTERGENIC | C | T | - | - |
| - | 19,269,333 | INTERGENIC | C | G | - | - |
| - | 19,269,898 | INTERGENIC | T | C | - | - |
| - | 19,269,904 | INTERGENIC | A | C | - | - |
| - | 19,269,968 | INTERGENIC | T | C | - | - |

|            |                    |            |                       |   |   |   |   |
|------------|--------------------|------------|-----------------------|---|---|---|---|
|            | -                  | 19,270,026 | INTERGENIC            | A | T | - | - |
|            | -                  | 19,270,047 | INTERGENIC            | C | A | - | - |
|            | -                  | 19,270,074 | INTERGENIC            | G | A | - | - |
|            | -                  | 19,270,080 | INTERGENIC            | T | A | - | - |
| F1M1G9_RAT | ENSRNOT00000040020 | 19,271,025 | DOWNSTREAM            | G | A | - | - |
| F1M1G9_RAT | ENSRNOT00000040020 | 19,271,060 | DOWNSTREAM            | C | T | - | - |
| F1M1G9_RAT | ENSRNOT00000040020 | 19,271,090 | DOWNSTREAM            | T | C | - | - |
| F1M1G9_RAT | ENSRNOT00000040020 | 19,271,091 | DOWNSTREAM            | G | C | - | - |
| F1M1G9_RAT | ENSRNOT00000040020 | 19,271,366 | DOWNSTREAM            | T | C | - | - |
| F1M1G9_RAT | ENSRNOT00000040020 | 19,271,378 | DOWNSTREAM            | G | A | - | - |
| F1M1G9_RAT | ENSRNOT00000040020 | 19,271,543 | DOWNSTREAM            | T | C | - | - |
| F1M1G9_RAT | ENSRNOT00000040020 | 19,271,626 | DOWNSTREAM            | C | G | - | - |
| F1M1G9_RAT | ENSRNOT00000040020 | 19,276,027 | SYNONYMOUS_CODING     | C | T | - | - |
| F1M1G9_RAT | ENSRNOT00000040020 | 19,276,053 | SYNONYMOUS_CODING     | G | A | - | - |
| F1M1G9_RAT | ENSRNOT00000040020 | 19,277,971 | INTRONIC              | A | T | - | - |
| F1M1G9_RAT | ENSRNOT00000040020 | 19,278,872 | INTRONIC              | A | G | - | - |
| F1M1G9_RAT | ENSRNOT00000040020 | 19,279,040 | INTRONIC              | G | A | - | - |
| F1M1G9_RAT | ENSRNOT00000040020 | 19,279,073 | INTRONIC              | C | T | - | - |
| F1M1G9_RAT | ENSRNOT00000040020 | 19,279,178 | INTRONIC              | A | G | - | - |
| F1M1G9_RAT | ENSRNOT00000040020 | 19,284,219 | INTRONIC              | A | T | - | - |
| F1M1G9_RAT | ENSRNOT00000040020 | 19,284,261 | INTRONIC              | A | T | - | - |
| F1M1G9_RAT | ENSRNOT00000040020 | 19,284,293 | INTRONIC              | C | G | - | - |
| F1M1G9_RAT | ENSRNOT00000040020 | 19,284,294 | INTRONIC              | A | G | - | - |
| F1M1G9_RAT | ENSRNOT00000040020 | 19,284,301 | INTRONIC              | T | A | - | - |
| F1M1G9_RAT | ENSRNOT00000040020 | 19,284,321 | INTRONIC              | T | A | - | - |
| F1M1G9_RAT | ENSRNOT00000040020 | 19,284,346 | INTRONIC              | G | T | - | - |
| F1M1G9_RAT | ENSRNOT00000040020 | 19,284,836 | INTRONIC              | T | A | - | - |
| F1M1G9_RAT | ENSRNOT00000040020 | 19,284,843 | INTRONIC              | A | G | - | - |
| F1M1G9_RAT | ENSRNOT00000040020 | 19,286,343 | INTRONIC              | T | C | - | - |
| F1M1G9_RAT | ENSRNOT00000040020 | 19,291,071 | UPSTREAM              | C | A | - | - |
| F1M1G9_RAT | ENSRNOT00000040020 | 19,291,166 | UPSTREAM              | C | G | - | - |
| F1M1G9_RAT | ENSRNOT00000040020 | 19,291,192 | UPSTREAM              | G | C | - | - |
| F1M1G9_RAT | ENSRNOT00000040020 | 19,291,195 | UPSTREAM              | T | C | - | - |
| F1M1G9_RAT | ENSRNOT00000040020 | 19,291,261 | UPSTREAM              | G | A | - | - |
| F1M1G9_RAT | ENSRNOT00000040020 | 19,291,269 | UPSTREAM              | C | T | - | - |
| F1M1G9_RAT | ENSRNOT00000040020 | 19,292,172 | UPSTREAM              | G | A | - | - |
| F1M1G9_RAT | ENSRNOT00000040020 | 19,292,202 | UPSTREAM              | C | T | - | - |
| F1M1G9_RAT | ENSRNOT00000040020 | 19,292,592 | UPSTREAM              | G | T | - | - |
| F1M1G9_RAT | ENSRNOT00000040020 | 19,292,612 | UPSTREAM              | A | G | - | - |
| F1M1G9_RAT | ENSRNOT00000040020 | 19,292,613 | UPSTREAM              | T | A | - | - |
| F1M1G9_RAT | ENSRNOT00000040020 | 19,292,626 | UPSTREAM              | T | C | - | - |
| F1M1G9_RAT | ENSRNOT00000040020 | 19,292,857 | UPSTREAM              | T | A | - | - |
| F1M1G9_RAT | ENSRNOT00000040020 | 19,292,865 | UPSTREAM              | A | G | - | - |
|            | -                  | 19,294,145 | INTERGENIC            | G | C | - | - |
|            | -                  | 19,296,372 | INTERGENIC            | A | G | - | - |
|            | -                  | 19,296,423 | INTERGENIC            | T | A | - | - |
|            | -                  | 19,296,424 | INTERGENIC            | C | T | - | - |
|            | -                  | 19,296,516 | INTERGENIC            | G | A | - | - |
|            | -                  | 19,297,507 | INTERGENIC            | C | A | - | - |
|            | -                  | 19,297,531 | INTERGENIC            | G | A | - | - |
|            | -                  | 19,297,603 | INTERGENIC            | C | A | - | - |
|            | -                  | 19,297,636 | INTERGENIC            | C | G | - | - |
|            | -                  | 19,297,657 | INTERGENIC            | C | T | - | - |
|            | -                  | 19,297,681 | INTERGENIC            | T | G | - | - |
|            | -                  | 19,297,727 | INTERGENIC            | T | C | - | - |
|            | -                  | 19,297,761 | INTERGENIC            | T | C | - | - |
|            | -                  | 19,297,762 | INTERGENIC            | G | T | - | - |
|            | -                  | 19,299,851 | INTERGENIC            | T | C | - | - |
|            | -                  | 19,299,889 | INTERGENIC            | C | G | - | - |
|            | -                  | 19,299,910 | INTERGENIC            | A | G | - | - |
|            | -                  | 19,299,922 | INTERGENIC            | T | C | - | - |
|            | -                  | 19,310,068 | INTERGENIC            | A | C | - | - |
|            | -                  | 19,310,094 | INTERGENIC            | C | G | - | - |
|            | -                  | 19,310,144 | INTERGENIC            | T | C | - | - |
|            | -                  | 19,310,180 | INTERGENIC            | T | A | - | - |
|            | -                  | 19,310,207 | INTERGENIC            | G | C | - | - |
|            | -                  | 19,310,246 | INTERGENIC            | T | C | - | - |
| F1LT44_RAT | ENSRNOT00000041490 | 19,311,753 | UPSTREAM              | A | G | - | - |
| F1LT44_RAT | ENSRNOT00000041490 | 19,311,800 | UPSTREAM              | G | A | - | - |
| F1LT44_RAT | ENSRNOT00000041490 | 19,312,224 | UPSTREAM              | T | A | - | - |
| F1LT44_RAT | ENSRNOT00000041490 | 19,312,247 | UPSTREAM              | T | C | - | - |
| F1LT44_RAT | ENSRNOT00000041490 | 19,312,652 | UPSTREAM              | C | T | - | - |
| F1LT44_RAT | ENSRNOT00000041490 | 19,313,805 | UPSTREAM              | G | C | - | - |
| F1LT44_RAT | ENSRNOT00000041490 | 19,313,917 | UPSTREAM              | T | C | - | - |
| F1LT44_RAT | ENSRNOT00000041490 | 19,313,946 | UPSTREAM              | T | C | - | - |
| F1LT44_RAT | ENSRNOT00000041490 | 19,316,368 | UPSTREAM              | A | G | - | - |
| F1LT44_RAT | ENSRNOT00000041490 | 19,316,435 | UPSTREAM              | A | G | - | - |
| F1LT44_RAT | ENSRNOT00000041490 | 19,317,992 | SYNONYMOUS_CODING     | T | C | - | - |
| F1LT44_RAT | ENSRNOT00000041490 | 19,318,240 | NON_SYNONYMOUS_CODING | G | A | G | E |
| F1LT44_RAT | ENSRNOT00000041490 | 19,319,460 | INTRONIC              | C | A | - | - |

|            |                    |            |                       |   |   |   |   |
|------------|--------------------|------------|-----------------------|---|---|---|---|
| F1LT44_RAT | ENSRNOT00000041490 | 19,319,462 | INTRONIC              | C | T | - | - |
| F1LT44_RAT | ENSRNOT00000041490 | 19,320,988 | INTRONIC              | G | A | - | - |
| F1LT44_RAT | ENSRNOT00000041490 | 19,321,069 | INTRONIC              | C | T | - | - |
| F1LT44_RAT | ENSRNOT00000041490 | 19,321,071 | INTRONIC              | G | T | - | - |
| F1LT44_RAT | ENSRNOT00000041490 | 19,326,397 | INTRONIC              | T | C | - | - |
| F1LT44_RAT | ENSRNOT00000041490 | 19,326,399 | INTRONIC              | C | G | - | - |
| F1LT44_RAT | ENSRNOT00000041490 | 19,327,243 | INTRONIC              | T | C | - | - |
| F1LT44_RAT | ENSRNOT00000041490 | 19,327,272 | INTRONIC              | T | C | - | - |
| F1LT44_RAT | ENSRNOT00000041490 | 19,327,312 | INTRONIC              | T | G | - | - |
| F1LT44_RAT | ENSRNOT00000041490 | 19,327,313 | INTRONIC              | C | G | - | - |
| F1LT44_RAT | ENSRNOT00000041490 | 19,330,719 | INTRONIC              | C | T | - | - |
| F1LT44_RAT | ENSRNOT00000041490 | 19,330,805 | INTRONIC              | T | C | - | - |
| F1LT44_RAT | ENSRNOT00000041490 | 19,330,842 | INTRONIC              | C | T | - | - |
| F1LT44_RAT | ENSRNOT00000041490 | 19,330,849 | INTRONIC              | T | C | - | - |
| F1LT44_RAT | ENSRNOT00000041490 | 19,330,858 | INTRONIC              | G | C | - | - |
| F1LT44_RAT | ENSRNOT00000041490 | 19,333,496 | NON_SYNONYMOUS_CODING | T | C | V | A |
| F1LT44_RAT | ENSRNOT00000041490 | 19,333,584 | DOWNSTREAM            | A | G | - | - |
| F1LT44_RAT | ENSRNOT00000041490 | 19,333,697 | DOWNSTREAM            | A | T | - | - |
| F1LT44_RAT | ENSRNOT00000041490 | 19,333,814 | DOWNSTREAM            | G | C | - | - |
| F1LT44_RAT | ENSRNOT00000041490 | 19,333,845 | DOWNSTREAM            | G | A | - | - |
| F1LT44_RAT | ENSRNOT00000041490 | 19,333,873 | DOWNSTREAM            | C | T | - | - |
| F1LT44_RAT | ENSRNOT00000041490 | 19,333,890 | DOWNSTREAM            | T | G | - | - |
| F1LT44_RAT | ENSRNOT00000041490 | 19,333,906 | DOWNSTREAM            | T | C | - | - |
| F1LT44_RAT | ENSRNOT00000041490 | 19,333,944 | DOWNSTREAM            | C | A | - | - |
| F1LT44_RAT | ENSRNOT00000041490 | 19,333,977 | DOWNSTREAM            | T | C | - | - |
| F1LT44_RAT | ENSRNOT00000041490 | 19,333,978 | DOWNSTREAM            | G | A | - | - |
| F1LT44_RAT | ENSRNOT00000041490 | 19,337,326 | DOWNSTREAM            | T | C | - | - |
| F1LT44_RAT | ENSRNOT00000041490 | 19,337,375 | DOWNSTREAM            | A | G | - | - |
| -          | -                  | 19,338,617 | INTERGENIC            | T | C | - | - |
| -          | -                  | 19,338,643 | INTERGENIC            | C | T | - | - |
| -          | -                  | 19,338,655 | INTERGENIC            | T | C | - | - |
| -          | -                  | 19,338,676 | INTERGENIC            | A | T | - | - |
| -          | -                  | 19,338,705 | INTERGENIC            | T | C | - | - |
| -          | -                  | 19,338,706 | INTERGENIC            | G | A | - | - |
| -          | -                  | 19,338,731 | INTERGENIC            | A | C | - | - |
| -          | -                  | 19,342,240 | INTERGENIC            | A | G | - | - |
| -          | -                  | 19,342,270 | INTERGENIC            | C | T | - | - |
| -          | -                  | 19,342,309 | INTERGENIC            | C | T | - | - |
| -          | -                  | 19,342,344 | INTERGENIC            | G | A | - | - |
| -          | -                  | 19,342,397 | INTERGENIC            | C | A | - | - |
| -          | -                  | 19,346,878 | INTERGENIC            | T | A | - | - |
| -          | -                  | 19,346,926 | INTERGENIC            | T | C | - | - |
| -          | -                  | 19,346,941 | INTERGENIC            | G | A | - | - |
| -          | -                  | 19,346,949 | INTERGENIC            | A | C | - | - |
| -          | -                  | 19,346,977 | INTERGENIC            | T | C | - | - |
| -          | -                  | 19,346,982 | INTERGENIC            | A | C | - | - |
| -          | -                  | 19,347,013 | INTERGENIC            | C | T | - | - |
| -          | -                  | 19,347,209 | INTERGENIC            | T | C | - | - |
| -          | -                  | 19,348,655 | INTERGENIC            | A | G | - | - |
| -          | -                  | 19,348,676 | INTERGENIC            | A | T | - | - |
| -          | -                  | 19,350,270 | INTERGENIC            | G | A | - | - |
| -          | -                  | 19,350,397 | INTERGENIC            | C | T | - | - |
| -          | -                  | 19,350,422 | INTERGENIC            | G | T | - | - |
| -          | -                  | 19,350,543 | INTERGENIC            | C | G | - | - |
| -          | -                  | 19,350,560 | INTERGENIC            | A | G | - | - |
| -          | -                  | 19,350,595 | INTERGENIC            | A | G | - | - |
| -          | -                  | 19,350,613 | INTERGENIC            | A | G | - | - |
| -          | -                  | 19,351,780 | INTERGENIC            | C | T | - | - |
| -          | -                  | 19,351,783 | INTERGENIC            | C | A | - | - |
| -          | -                  | 19,351,826 | INTERGENIC            | A | C | - | - |
| -          | -                  | 19,351,867 | INTERGENIC            | T | C | - | - |
| -          | -                  | 19,351,898 | INTERGENIC            | A | G | - | - |
| -          | -                  | 19,353,038 | INTERGENIC            | C | A | - | - |
| -          | -                  | 19,353,197 | INTERGENIC            | A | G | - | - |
| -          | -                  | 19,353,208 | INTERGENIC            | T | A | - | - |
| -          | -                  | 19,353,267 | INTERGENIC            | G | C | - | - |
| -          | -                  | 19,353,282 | INTERGENIC            | G | C | - | - |
| -          | -                  | 19,353,313 | INTERGENIC            | G | C | - | - |
| -          | -                  | 19,353,327 | INTERGENIC            | A | T | - | - |
| -          | -                  | 19,353,358 | INTERGENIC            | T | A | - | - |
| -          | -                  | 19,353,362 | INTERGENIC            | T | C | - | - |
| -          | -                  | 19,353,426 | INTERGENIC            | C | A | - | - |
| -          | -                  | 19,354,961 | INTERGENIC            | G | A | - | - |
| -          | -                  | 19,355,126 | INTERGENIC            | T | C | - | - |
| -          | -                  | 19,355,705 | INTERGENIC            | A | G | - | - |
| -          | -                  | 19,370,261 | INTERGENIC            | C | A | - | - |
| -          | -                  | 19,370,590 | INTERGENIC            | A | T | - | - |
| -          | -                  | 19,370,671 | INTERGENIC            | A | T | - | - |
| -          | -                  | 19,381,822 | INTERGENIC            | C | T | - | - |
| -          | -                  | 19,381,862 | INTERGENIC            | G | A | - | - |

|            |                    |            |                       |   |   |   |   |
|------------|--------------------|------------|-----------------------|---|---|---|---|
| -          | -                  | 19,383,267 | INTERGENIC            | G | T | - | - |
| -          | -                  | 19,383,277 | INTERGENIC            | T | C | - | - |
| -          | -                  | 19,383,371 | INTERGENIC            | T | A | - | - |
| -          | -                  | 19,383,438 | INTERGENIC            | T | A | - | - |
| -          | -                  | 19,383,968 | INTERGENIC            | A | T | - | - |
| -          | -                  | 19,384,011 | INTERGENIC            | A | G | - | - |
| -          | -                  | 19,384,444 | INTERGENIC            | A | G | - | - |
| -          | -                  | 19,384,845 | INTERGENIC            | A | C | - | - |
| -          | -                  | 19,385,035 | INTERGENIC            | A | G | - | - |
| -          | -                  | 19,385,760 | INTERGENIC            | T | A | - | - |
| F1LW11_RAT | ENSRNOT00000042410 | 19,386,245 | UPSTREAM              | G | A | - | - |
| F1LW11_RAT | ENSRNOT00000042410 | 19,386,458 | UPSTREAM              | T | G | - | - |
| F1LW11_RAT | ENSRNOT00000042410 | 19,387,087 | UPSTREAM              | C | G | - | - |
| F1LW11_RAT | ENSRNOT00000042410 | 19,387,255 | UPSTREAM              | G | A | - | - |
| F1LW11_RAT | ENSRNOT00000042410 | 19,387,739 | UPSTREAM              | G | A | - | - |
| F1LW11_RAT | ENSRNOT00000042410 | 19,388,048 | UPSTREAM              | A | G | - | - |
| F1LW11_RAT | ENSRNOT00000042410 | 19,389,829 | UPSTREAM              | T | C | - | - |
| F1LW11_RAT | ENSRNOT00000042410 | 19,389,955 | UPSTREAM              | C | G | - | - |
| F1LW11_RAT | ENSRNOT00000042410 | 19,390,359 | UPSTREAM              | G | A | - | - |
| F1LW11_RAT | ENSRNOT00000042410 | 19,390,462 | UPSTREAM              | G | A | - | - |
| F1LW11_RAT | ENSRNOT00000042410 | 19,390,500 | UPSTREAM              | C | T | - | - |
| F1LW11_RAT | ENSRNOT00000042410 | 19,390,562 | UPSTREAM              | T | C | - | - |
| F1LW11_RAT | ENSRNOT00000042410 | 19,390,597 | UPSTREAM              | A | G | - | - |
| F1LW11_RAT | ENSRNOT00000042410 | 19,390,875 | UPSTREAM              | A | T | - | - |
| F1LW11_RAT | ENSRNOT00000042410 | 19,390,956 | UPSTREAM              | T | G | - | - |
| F1LW11_RAT | ENSRNOT00000042410 | 19,391,017 | UPSTREAM              | G | A | - | - |
| F1LW11_RAT | ENSRNOT00000042410 | 19,391,127 | UPSTREAM              | A | G | - | - |
| F1LW11_RAT | ENSRNOT00000042410 | 19,391,176 | UPSTREAM              | A | T | - | - |
| F1LW11_RAT | ENSRNOT00000042410 | 19,391,212 | NON_SYNONYMOUS_CODING | T | A | C | S |
| F1LW11_RAT | ENSRNOT00000042410 | 19,391,958 | INTRONIC              | A | G | - | - |
| F1LW11_RAT | ENSRNOT00000042410 | 19,391,963 | INTRONIC              | C | T | - | - |
| F1LW11_RAT | ENSRNOT00000042410 | 19,392,023 | INTRONIC              | C | T | - | - |
| F1LW11_RAT | ENSRNOT00000042410 | 19,392,303 | SYNONYMOUS_CODING     | A | G | - | - |
| F1LW11_RAT | ENSRNOT00000042410 | 19,392,853 | DOWNSTREAM            | C | G | - | - |
| F1LW11_RAT | ENSRNOT00000042410 | 19,393,191 | DOWNSTREAM            | A | T | - | - |
| F1LW11_RAT | ENSRNOT00000042410 | 19,393,384 | DOWNSTREAM            | A | C | - | - |
| F1LW11_RAT | ENSRNOT00000042410 | 19,393,499 | DOWNSTREAM            | G | A | - | - |
| F1LW11_RAT | ENSRNOT00000042410 | 19,393,530 | DOWNSTREAM            | C | A | - | - |
| F1LW11_RAT | ENSRNOT00000042410 | 19,393,592 | DOWNSTREAM            | A | G | - | - |
| F1LW11_RAT | ENSRNOT00000042410 | 19,393,779 | DOWNSTREAM            | C | A | - | - |
| F1LW11_RAT | ENSRNOT00000042410 | 19,393,805 | DOWNSTREAM            | A | G | - | - |
| F1LW11_RAT | ENSRNOT00000042410 | 19,394,072 | DOWNSTREAM            | G | A | - | - |
| F1LW11_RAT | ENSRNOT00000042410 | 19,394,177 | DOWNSTREAM            | C | T | - | - |
| F1LW11_RAT | ENSRNOT00000042410 | 19,394,752 | DOWNSTREAM            | A | T | - | - |
| F1LW11_RAT | ENSRNOT00000042410 | 19,394,928 | DOWNSTREAM            | G | A | - | - |
| F1LW11_RAT | ENSRNOT00000042410 | 19,395,592 | DOWNSTREAM            | T | C | - | - |
| F1LW11_RAT | ENSRNOT00000042410 | 19,395,979 | DOWNSTREAM            | G | C | - | - |
| F1LW11_RAT | ENSRNOT00000042410 | 19,397,199 | DOWNSTREAM            | T | C | - | - |
| -          | -                  | 19,401,049 | INTERGENIC            | A | T | - | - |
| -          | -                  | 19,401,114 | INTERGENIC            | G | C | - | - |
| -          | -                  | 19,401,141 | INTERGENIC            | A | G | - | - |
| -          | -                  | 19,401,153 | INTERGENIC            | C | G | - | - |
| -          | -                  | 19,401,207 | INTERGENIC            | G | A | - | - |
| -          | -                  | 19,401,267 | INTERGENIC            | C | A | - | - |
| -          | -                  | 19,401,269 | INTERGENIC            | A | C | - | - |
| -          | -                  | 19,401,343 | INTERGENIC            | T | C | - | - |
| -          | -                  | 19,401,394 | INTERGENIC            | G | T | - | - |
| -          | -                  | 19,401,395 | INTERGENIC            | T | G | - | - |
| -          | -                  | 19,401,431 | INTERGENIC            | A | G | - | - |
| -          | -                  | 19,401,456 | INTERGENIC            | T | A | - | - |
| -          | -                  | 19,401,678 | INTERGENIC            | G | T | - | - |
| -          | -                  | 19,402,749 | INTERGENIC            | G | A | - | - |
| -          | -                  | 19,402,863 | INTERGENIC            | T | A | - | - |
| -          | -                  | 19,402,918 | INTERGENIC            | C | T | - | - |
| -          | -                  | 19,403,030 | INTERGENIC            | T | A | - | - |
| -          | -                  | 19,406,454 | INTERGENIC            | T | C | - | - |
| -          | -                  | 19,406,538 | INTERGENIC            | T | C | - | - |
| -          | -                  | 19,406,542 | INTERGENIC            | C | A | - | - |
| -          | -                  | 19,406,625 | INTERGENIC            | T | C | - | - |
| -          | -                  | 19,406,640 | INTERGENIC            | A | T | - | - |
| -          | -                  | 19,406,662 | INTERGENIC            | T | C | - | - |
| -          | -                  | 19,406,743 | INTERGENIC            | T | A | - | - |
| -          | -                  | 19,406,758 | INTERGENIC            | T | A | - | - |
| -          | -                  | 19,406,759 | INTERGENIC            | C | T | - | - |
| -          | -                  | 19,406,790 | INTERGENIC            | C | T | - | - |
| -          | -                  | 19,406,791 | INTERGENIC            | A | G | - | - |
| -          | -                  | 19,406,832 | INTERGENIC            | T | A | - | - |
| -          | -                  | 19,406,838 | INTERGENIC            | C | T | - | - |
| -          | -                  | 19,406,891 | INTERGENIC            | A | G | - | - |
| -          | -                  | 19,406,899 | INTERGENIC            | G | A | - | - |

|   |            |            |   |   |   |   |
|---|------------|------------|---|---|---|---|
| - | 19,407,003 | INTERGENIC | T | A | - | - |
| - | 19,407,114 | INTERGENIC | C | G | - | - |
| - | 19,407,165 | INTERGENIC | G | C | - | - |
| - | 19,407,171 | INTERGENIC | C | T | - | - |
| - | 19,407,226 | INTERGENIC | C | A | - | - |
| - | 19,407,342 | INTERGENIC | G | A | - | - |
| - | 19,409,986 | INTERGENIC | G | T | - | - |
| - | 19,409,996 | INTERGENIC | T | C | - | - |
| - | 19,410,025 | INTERGENIC | C | T | - | - |
| - | 19,410,511 | INTERGENIC | T | C | - | - |
| - | 19,410,547 | INTERGENIC | G | A | - | - |
| - | 19,410,619 | INTERGENIC | C | G | - | - |
| - | 19,410,652 | INTERGENIC | A | G | - | - |
| - | 19,410,721 | INTERGENIC | T | G | - | - |
| - | 19,410,967 | INTERGENIC | C | T | - | - |
| - | 19,410,968 | INTERGENIC | T | G | - | - |
| - | 19,411,517 | INTERGENIC | G | A | - | - |
| - | 19,411,519 | INTERGENIC | C | T | - | - |
| - | 19,411,565 | INTERGENIC | G | A | - | - |
| - | 19,411,581 | INTERGENIC | A | C | - | - |
| - | 19,411,627 | INTERGENIC | C | G | - | - |
| - | 19,411,644 | INTERGENIC | G | A | - | - |
| - | 19,411,656 | INTERGENIC | C | T | - | - |
| - | 19,411,711 | INTERGENIC | G | A | - | - |
| - | 19,411,727 | INTERGENIC | G | T | - | - |
| - | 19,411,783 | INTERGENIC | A | C | - | - |
| - | 19,411,942 | INTERGENIC | A | C | - | - |
| - | 19,411,970 | INTERGENIC | C | A | - | - |
| - | 19,412,064 | INTERGENIC | C | G | - | - |
| - | 19,412,117 | INTERGENIC | A | C | - | - |
| - | 19,412,132 | INTERGENIC | A | G | - | - |
| - | 19,412,266 | INTERGENIC | A | G | - | - |
| - | 19,412,312 | INTERGENIC | G | T | - | - |
| - | 19,412,481 | INTERGENIC | T | A | - | - |
| - | 19,412,482 | INTERGENIC | T | C | - | - |
| - | 19,412,526 | INTERGENIC | A | G | - | - |
| - | 19,412,550 | INTERGENIC | T | G | - | - |
| - | 19,412,648 | INTERGENIC | T | C | - | - |
| - | 19,412,697 | INTERGENIC | A | C | - | - |
| - | 19,412,700 | INTERGENIC | A | C | - | - |
| - | 19,412,716 | INTERGENIC | C | T | - | - |
| - | 19,412,920 | INTERGENIC | T | A | - | - |
| - | 19,412,940 | INTERGENIC | G | A | - | - |
| - | 19,412,972 | INTERGENIC | T | G | - | - |
| - | 19,413,585 | INTERGENIC | A | T | - | - |
| - | 19,413,595 | INTERGENIC | A | G | - | - |
| - | 19,413,732 | INTERGENIC | T | A | - | - |
| - | 19,413,735 | INTERGENIC | T | C | - | - |
| - | 19,418,117 | INTERGENIC | G | A | - | - |
| - | 19,418,275 | INTERGENIC | A | T | - | - |
| - | 19,419,388 | INTERGENIC | T | C | - | - |
| - | 19,419,389 | INTERGENIC | T | C | - | - |
| - | 19,419,447 | INTERGENIC | C | T | - | - |
| - | 19,419,448 | INTERGENIC | C | T | - | - |
| - | 19,419,508 | INTERGENIC | C | A | - | - |
| - | 19,419,519 | INTERGENIC | C | T | - | - |
| - | 19,419,800 | INTERGENIC | G | A | - | - |
| - | 19,419,823 | INTERGENIC | T | C | - | - |
| - | 19,419,870 | INTERGENIC | G | C | - | - |
| - | 19,419,943 | INTERGENIC | G | A | - | - |
| - | 19,420,967 | INTERGENIC | A | G | - | - |
| - | 19,421,111 | INTERGENIC | T | A | - | - |
| - | 19,421,294 | INTERGENIC | G | T | - | - |
| - | 19,421,388 | INTERGENIC | A | T | - | - |
| - | 19,421,503 | INTERGENIC | G | A | - | - |
| - | 19,421,515 | INTERGENIC | T | A | - | - |
| - | 19,421,637 | INTERGENIC | C | T | - | - |
| - | 19,421,709 | INTERGENIC | G | T | - | - |
| - | 19,421,808 | INTERGENIC | T | C | - | - |
| - | 19,421,830 | INTERGENIC | C | G | - | - |
| - | 19,421,834 | INTERGENIC | C | A | - | - |
| - | 19,423,090 | INTERGENIC | A | G | - | - |
| - | 19,423,141 | INTERGENIC | A | C | - | - |
| - | 19,424,354 | INTERGENIC | G | A | - | - |
| - | 19,424,396 | INTERGENIC | A | C | - | - |
| - | 19,424,502 | INTERGENIC | C | T | - | - |
| - | 19,425,099 | INTERGENIC | T | C | - | - |
| - | 19,425,112 | INTERGENIC | A | C | - | - |
| - | 19,425,147 | INTERGENIC | G | A | - | - |
| - | 19,430,570 | INTERGENIC | C | T | - | - |

|            |                    |            |            |   |   |   |   |
|------------|--------------------|------------|------------|---|---|---|---|
| -          | -                  | 19,432,845 | INTERGENIC | A | C | - | - |
| -          | -                  | 19,432,958 | INTERGENIC | C | A | - | - |
| -          | -                  | 19,433,041 | INTERGENIC | G | C | - | - |
| -          | -                  | 19,433,578 | INTERGENIC | A | C | - | - |
| -          | -                  | 19,433,738 | INTERGENIC | T | G | - | - |
| -          | -                  | 19,433,766 | INTERGENIC | T | C | - | - |
| -          | -                  | 19,433,819 | INTERGENIC | A | G | - | - |
| -          | -                  | 19,434,505 | INTERGENIC | C | T | - | - |
| -          | -                  | 19,453,215 | INTERGENIC | A | G | - | - |
| -          | -                  | 19,453,248 | INTERGENIC | A | G | - | - |
| LOC681182  | ENSRNOT00000036416 | 19,461,689 | UPSTREAM   | C | T | - | - |
| LOC681182  | ENSRNOT00000036416 | 19,461,712 | UPSTREAM   | A | C | - | - |
| LOC681182  | ENSRNOT00000036416 | 19,461,722 | UPSTREAM   | G | T | - | - |
| D3ZY80_RAT | ENSRNOT00000059675 | 19,531,815 | UPSTREAM   | A | G | - | - |
| D3ZY80_RAT | ENSRNOT00000059675 | 19,533,765 | UPSTREAM   | G | A | - | - |
| D3ZY80_RAT | ENSRNOT00000059675 | 19,535,724 | INTRONIC   | C | G | - | - |
| D3ZY80_RAT | ENSRNOT00000059675 | 19,536,380 | INTRONIC   | G | A | - | - |
| D3ZY80_RAT | ENSRNOT00000059675 | 19,539,041 | INTRONIC   | T | C | - | - |
| D3ZY80_RAT | ENSRNOT00000059675 | 19,539,269 | INTRONIC   | G | A | - | - |
| D3ZY80_RAT | ENSRNOT00000059675 | 19,539,358 | INTRONIC   | C | T | - | - |
| D3ZY80_RAT | ENSRNOT00000059675 | 19,539,426 | INTRONIC   | C | G | - | - |
| D3ZY80_RAT | ENSRNOT00000059675 | 19,539,460 | INTRONIC   | T | G | - | - |
| D3ZY80_RAT | ENSRNOT00000059675 | 19,539,917 | INTRONIC   | G | T | - | - |
| D3ZY80_RAT | ENSRNOT00000059675 | 19,540,064 | INTRONIC   | C | T | - | - |
| D3ZY80_RAT | ENSRNOT00000059675 | 19,540,297 | INTRONIC   | G | A | - | - |
| D3ZY80_RAT | ENSRNOT00000059675 | 19,541,105 | 5PRIME_UTR | A | G | - | - |
| D3ZY80_RAT | ENSRNOT00000059675 | 19,541,698 | INTRONIC   | A | G | - | - |
| D3ZY80_RAT | ENSRNOT00000059675 | 19,543,976 | INTRONIC   | T | C | - | - |
| D3ZY80_RAT | ENSRNOT00000059675 | 19,544,415 | DOWNSTREAM | T | G | - | - |
| D3ZY80_RAT | ENSRNOT00000059675 | 19,544,975 | DOWNSTREAM | G | T | - | - |
| D3ZY80_RAT | ENSRNOT00000059675 | 19,545,389 | DOWNSTREAM | C | T | - | - |
| D3ZY80_RAT | ENSRNOT00000059675 | 19,546,651 | DOWNSTREAM | A | C | - | - |
| D3ZY80_RAT | ENSRNOT00000059675 | 19,546,701 | DOWNSTREAM | G | A | - | - |
| D3ZY80_RAT | ENSRNOT00000059675 | 19,546,702 | DOWNSTREAM | A | G | - | - |
